# Supplementary material for: Preferred evolutionary routes of convergence in Klebsiella pneumoniae favor siderophore acquisition over hypervirulence
Source: Research Square preprint supplement (doi:10.21203/rs.3.rs-8613390/v1), 2026-02-13
Supplement: Supplementary file 1 [file 105fe3029a70db7d516a9ad1.xlsx]

## Sheet: all
Isolate	Collection Date	Country	Isolation Source	MLST	Fig. 1 Phylogeny	ONT data	Accession Genbank	Molecular typing and prediction of virulence and resistance genes from Kleborate (17)
								Yersiniabactin	YbST	Colibactin	CbST	Aerobactin	AbST	Salmochelin	SmST	RmpADC	RmST	rmpA2	peg-344*	Carbapenemase acquired	ESBL acquired	Aminoglycoside acquired	Colistin acquired	Fcyn_acquired	Flq_acquired	MLS_acquired	Phe_acquired	Rif_acquired	Sul_acquired	Tet_acquired	Tgc_acquired	Tmt_acquired	Beta-lactamase acquired	Bla_inhR_acquired	Beta lactamase Chrm	SHV_mutations	Omp_mutations	Col_mutations	Flq_mutations	K_locus	K_type	K_locus_problems	K_locus_confidence	K_locus_identity	K_locus_missing_genes	O_locus	O_type	O_locus_problems	O_locus_confidence
102522	2021-10-12	Georgia	Respiratory	ST268	no	no	SAMN54588090	ybt 10; ICEKp4	381-1LV	-	0	-	0	-	0	-	0	-	-	NDM-5;OXA-48	CTX-M-15	strA.v1*;strB.v1*	-	-	qnrS1	Mrx;mphA	-	-	sul1;sul2	-	-	dfrA12	-	-	SHV-11^	35Q	-	-	-	KL20	K20	-	Typeable	99.97%	-	O1/O2v1	O2a	-	Typeable
102523	2021-10-12	Georgia	Blood	ST15	no	no	SAMN54588091	ybt 16; ICEKp12 (truncated)	448-3LV	-	0	-	0	-	0	-	0	-	-	NDM-5;OXA-48	CTX-M-15	aac(6')-Ib-cr.v2;aadA16*;strA.v1;strB.v1	-	-	qnrB6^	-	catII.2*	arr-3	sul1;sul2	-	-	dfrA27	TEM-1D.v1^	-	SHV-28^	-	OmpK35-49%;OmpK36GD	-	GyrA-83F;GyrA-87A;ParC-80I	KL19	K19	-	Typeable	98.04%	-	O1/O2v2	O2afg	-	Typeable
102524	2021-10-12	Georgia	Respiratory	ST395	no	no	SAMN54588092	ybt 16; ICEKp12 (truncated)	530-4LV	-	0	-	0	-	0	-	0	-	-	OXA-48	CTX-M-15	aac(6')-Ib-cr.v2;aph(3')-VIa*;armA	-	-	qnrS1	mphE.v2;msrE	-	-	sul1	tet(A).v1	-	dfrA1.v1	OXA-1;TEM-1D.v1^	-	SHV-11	35Q	OmpK35-72%;OmpK36GD	MgrB-62%	GyrA-83I;ParC-80I	KL2	K2	?2	Typeable	99.82%	-	O1/O2v1	O1ab	?2	Typeable
102525	2021-10-12	Georgia	Respiratory	ST395	no	no	SAMN54588093	ybt 16; ICEKp12 (truncated)	530-4LV	-	0	-	0	-	0	-	0	-	-	OXA-48	-	aph(3')-VIa*;armA	-	-	qnrS1	mphE.v2;msrE	catA1^	-	sul1	tet(A).v1	-	dfrA1.v1	TEM-1D.v1^	-	SHV-11	35Q	OmpK35-72%;OmpK36GD	MgrB-62%	GyrA-83I;ParC-80I	KL2	K2	?2	Typeable	99.82%	-	O1/O2v1	O1ab	?2	Typeable
102526	2021-10-12	Georgia	Urine	ST395	yes	no	SAMN54588094	ybt 16; ICEKp12 (truncated)	530-4LV	-	0	iuc 1	63	-	0	rmp 1; KpVP-1	147-1LV	rmpA2_6*-47%	peg-344	NDM-1;OXA-48	CTX-M-15	aac(6')-Ib-cr.v2;armA	-	-	qnrS1	Mrx;mphA*;mphE.v2;msrE	catA1^	-	sul1;sul2	tet(A).v1*	-	dfrA1.v1;dfrA5	OXA-1;TEM-1D.v1^	-	SHV-11	35Q	OmpK35-72%;OmpK36GD	MgrB-62%	GyrA-83I;ParC-80I	KL2	K2	?2	Typeable	99.84%	-	O1/O2v1	O1ab	?2	Typeable
102527	2021-10-12	Georgia	Urine	ST15	no	no	SAMN54588095	ybt 16; ICEKp12	448-3LV	-	0	-	0	-	0	-	0	-	-	-	-	aadA2^;rmtB	-	-	-	-	-	-	sul1	-	-	dfrA12^	TEM-1D.v1^	-	SHV-28^	-	OmpK35-49%;OmpK36GD	-	GyrA-83F;GyrA-87A;ParC-80I	KL19	K19	?2	Typeable	98.04%	-	O1/O2v2	O2afg	-	Typeable
102529	2021-10-12	Georgia	Blood	ST395	no	no	SAMN54588096	ybt 16; ICEKp12 (truncated)	530-4LV	-	0	-	0	-	0	-	0	-	-	OXA-48	CTX-M-15	aac(6')-Ib-cr.v2;armA	-	-	qnrS1	mphE.v2;msrE	catA1^	-	sul1	tet(A).v1	-	dfrA1.v1	OXA-1;TEM-1D.v1^	-	SHV-11	35Q	OmpK35-72%;OmpK36GD	MgrB-62%	GyrA-83I;ParC-80I	KL2	K2	?2	Typeable	99.84%	-	O1/O2v1	O1ab	?2	Typeable
102531	2021-10-19	Georgia	Urine	ST512	no	no	SAMN54588097	-	0	-	0	-	0	-	0	-	0	-	-	KPC-3	-	armA	-	-	-	Mrx;mphA;mphE.v2;msrE	catA1^	-	sul1	-	-	dfrA12	-	-	SHV-11	35Q	OmpK35-25%;OmpK36GD	MgrB-79%	GyrA-83I;ParC-80I	KL107	unknown (KL107)	?2	Typeable	99.96%	-	O1/O2v2	O2afg	-	Typeable
102536	2021-10-26	Georgia	Fluid	ST395	yes	no	SAMN54588098	ybt 16; ICEKp12	530-2LV	-	0	iuc 3	88	-	0	-	0	-	-	NDM-5	CTX-M-15	rmtB	-	-	qnrS1	-	catA1^	-	sul1	tet(A).v1	-	dfrA1.v1	-	-	SHV-11	35Q	OmpK35-72%	-	GyrA-83I;ParC-80I	KL2	K2	-	Typeable	99.84%	-	O1/O2v1	O2a	-	Typeable
102537	2021-10-26	Georgia	Wound	ST395	no	no	SAMN54588099	ybt 16; ICEKp12 (truncated)	530-3LV	-	0	-	0	-	0	-	0	-	-	OXA-48	CTX-M-15	aac(6')-Ib-cr.v2	-	-	qnrS1	mphE.v2;msrE	catA1^	-	sul1	tet(A).v1	-	dfrA1.v1	OXA-1;TEM-1D.v1^	-	SHV-11	35Q	OmpK35-72%;OmpK36GD	-	GyrA-83I;ParC-80I	KL2	K2	-	Typeable	99.83%	-	O1/O2v1	O1ab	?2	Typeable
102538	2021-10-26	Georgia	Blood	ST395	yes	no	SAMN54588100	ybt 16; ICEKp12 (truncated)	530-4LV	-	0	iuc 1	63	-	0	rmp 1; KpVP-1	147-1LV	rmpA2_6*-47%	peg-344	NDM-1;OXA-48	CTX-M-15	aac(6')-Ib-cr.v2;armA	-	-	qnrS1	Mrx;mphA*;mphE.v2;msrE	catA1^	-	sul1;sul2	tet(A).v1*	-	dfrA1.v1;dfrA5	OXA-1;TEM-1D.v1^	-	SHV-11	35Q	OmpK35-72%;OmpK36GD	MgrB-62%	GyrA-83I;ParC-80I	KL2	K2	?2	Typeable	99.84%	-	O1/O2v1	O1ab	?2	Typeable
102539	2021-10-26	Georgia	Blood	ST395	no	no	SAMN54588101	ybt 16; ICEKp12 (truncated)	530-4LV	-	0	-	0	-	0	-	0	-	-	OXA-48	CTX-M-15	aac(6')-Ib-cr.v2;armA	-	-	qnrS1	mphE.v2;msrE	catA1^	-	sul1	tet(A).v1	-	dfrA1.v1	OXA-1;TEM-1D.v1^	-	SHV-11	35Q	OmpK35-72%;OmpK36GD	MgrB-62%	GyrA-83I;ParC-80I	KL2	K2	?2	Typeable	99.82%	-	O1/O2v1	O1ab	?2	Typeable
102541	2021-10-26	Georgia	Respiratory	ST395	no	no	SAMN54588102	ybt 16; ICEKp12 (truncated)	530-4LV	-	0	-	0	-	0	-	0	-	-	OXA-48	CTX-M-15	aac(6')-Ib-cr.v2;aph(3')-VIa*;armA	-	-	qnrS1	mphE.v2;msrE	catA1^	-	sul1	tet(A).v1	-	dfrA1.v1	OXA-1;TEM-1D.v1^	-	SHV-11	35Q	OmpK35-72%;OmpK36GD	MgrB-62%	GyrA-83I;ParC-80I	KL2	K2	?2	Typeable	99.84%	-	O1/O2v1	O1ab	?2	Typeable
102542	2021-10-26	Georgia	Blood	ST147	no	no	SAMN54588103	-	0	-	0	-	0	-	0	-	0	-	-	NDM-1	CTX-M-15	aadA*;aph(3')-VI;armA	-	-	qnrS1	mphE.v2;msrE	-	-	sul1;sul2	-	-	dfrA5	OXA-9.v1	-	SHV-11^	35Q	OmpK36TD	-	GyrA-83I;ParC-80I	KL20	K20	?2	Typeable	99.97%	-	O1/O2v1	O2a	-	Typeable
102554	2021-11-08	Georgia	Respiratory	ST45	no	no	SAMN54588104	-	0	-	0	-	0	-	0	-	0	-	-	OXA-48	-	armA	-	-	-	mphE.v2;msrE	-	-	-	tet(D)	-	-	TEM-1D.v1^	-	SHV-1	-	-	-	-	KL24	K24	-	Typeable	99.54%	-	O1/O2v1	O2a	-	Typeable
102561	2021-11-09	Georgia	Respiratory	ST23-KL57	yes	no	SAMN54588105	ybt 9; ICEKp3 (truncated)	583-1LV	-	0	iuc 1	1	-	0	-	0	rmpA2_8*-60%	peg-344	NDM-5;OXA-48	CTX-M-15	aac(3)-IIa.v1^;aac(6')-Ib3^;aadA2^;armA;strA.v1^;strB.v1	-	-	qnrB1.v2^	mphE.v2;msrE	catII.2*	-	sul1;sul2	-	-	dfrA12;dfrA14.v2*	TEM-1D.v1^	-	-	-	OmpK35-22%;OmpK36GD	-	GyrA-83I;ParC-80I	KL57	K57	?2!	Typeable	99.49%	-	O1/O2v2	O2afg	!	Typeable
102564	2021-11-09	Georgia	Urine	ST147	no	no	SAMN54588106	-	0	-	0	-	0	-	0	-	0	-	-	NDM-1	CTX-M-15	aadA*;aph(3')-VI;armA	-	-	qnrS1	mphE.v2;msrE	-	-	sul1;sul2	-	-	dfrA5	OXA-9.v1	-	SHV-11^	35Q	OmpK36TD	-	GyrA-83I;ParC-80I	KL20	K20	-	Typeable	99.97%	-	O1/O2v1	O2a	-	Typeable
102565	2021-11-09	Georgia	Urine	ST395	no	no	SAMN54588107	ybt 16; ICEKp12	530-2LV	-	0	-	0	-	0	-	0	-	-	NDM-5;OXA-48	CTX-M-15	aac(3)-IIa.v1^;aac(6')-Ib-cr.v2	-	-	qnrS1	-	catA1^	-	sul1	tet(A).v1	-	dfrA1.v1	OXA-1;TEM-1D.v1^	-	SHV-11	35Q	OmpK35-72%	-	GyrA-83I;ParC-80I	KL2	K2	-	Typeable	99.84%	-	O1/O2v1	O1ab	-	Typeable
102566	2021-11-09	Georgia	Urine	ST395	yes	no	SAMN54588108	ybt 16; ICEKp12 (truncated)	530-4LV	-	0	iuc 1	63	-	0	rmp 1; KpVP-1	147	rmpA2_6*-47%	peg-344	NDM-1;OXA-48	-	armA	-	-	qnrS1	Mrx;mphA*;mphE.v2;msrE	-	-	sul1	-	-	dfrA5	TEM-1D.v1^	-	SHV-11	35Q	OmpK35-72%;OmpK36GD	MgrB-62%	GyrA-83I;ParC-80I	KL2	K2	?2	Typeable	99.84%	-	O1/O2v1	O1ab	?2	Typeable
102567	2021-11-09	Georgia	Urine	ST395	yes	no	SAMN54588109	ybt 16; ICEKp12	530-2LV	-	0	iuc 3	88	-	0	-	0	-	-	NDM-5	CTX-M-15	rmtB	-	-	qnrS1	-	catA1^	-	sul1	tet(A).v1	-	dfrA1.v1	-	-	SHV-11	35Q	OmpK35-72%	-	GyrA-83I;ParC-80I	KL2	K2	-	Typeable	99.84%	-	O1/O2v1	O2a	-	Typeable
102568	2021-11-09	Georgia	Urine	ST395	yes	no	SAMN54588110	ybt 16; ICEKp12	530-2LV	-	0	iuc 3	88	-	0	-	0	-	-	NDM-5	-	-	-	-	-	-	-	-	sul1	-	-	-	-	-	SHV-11	35Q	OmpK35-72%	-	GyrA-83I;ParC-80I	KL2	K2	-	Typeable	99.84%	-	O1/O2v1	O2a	-	Typeable
102569	2021-11-09	Georgia	Blood	ST395	yes	no	SAMN54588111	ybt 16; ICEKp12	530-2LV	-	0	iuc 3	88	-	0	-	0	-	-	NDM-5	-	-	-	-	-	-	-	-	sul1	-	-	-	-	-	SHV-11	35Q	OmpK35-72%	-	GyrA-83I;ParC-80I	KL2	K2	-	Typeable	99.84%	-	O1/O2v1	O2a	-	Typeable
102572	2021-11-22	Georgia	Blood	ST101	no	no	SAMN54588112	ybt 9; ICEKp3	183-3LV	-	0	-	0	-	0	-	0	-	-	OXA-48	CTX-M-14^	aac(3)-IId^;aadA*;aadA16*;aph(3')-VIb*;aph3-Ia.v1;strA.v1^	-	-	qnrB2.v2^	Mrx;mphA	catB3.v2;floR.v1	arr-3	sul1	tet(A).v1?	-	dfrA14.v2*;dfrA27	OXA-1;OXA-9.v1	-	SHV-1^	-	OmpK35-17%;OmpK36GD	MgrB-62%	GyrA-83Y;GyrA-87N;ParC-80I	KL17	K17	-	Typeable	99.97%	-	O1/O2v1	O1ab	-	Typeable
102577	2021-11-24	Georgia	Blood	ST395	yes	no	SAMN54588113	ybt 16; ICEKp12 (truncated)	530-4LV	-	0	iuc 1	63	-	0	rmp 1; KpVP-1	147	rmpA2_6*-47%	peg-344	NDM-1;OXA-48	CTX-M-15	aac(6')-Ib-cr.v2;armA	-	-	qnrS1	Mrx;mphA*;mphE.v2;msrE	catA1^	-	sul1;sul2	tet(A).v1*	-	dfrA1.v1;dfrA5	OXA-1;TEM-1D.v1^	-	SHV-11	35Q	OmpK35-72%;OmpK36GD	MgrB-62%	GyrA-83I;ParC-80I	KL2	K2	?2	Typeable	99.84%	-	O1/O2v1	O1ab	?2	Typeable
102578	2021-11-24	Georgia	Blood	ST512	no	no	SAMN54588114	-	0	-	0	-	0	-	0	-	0	-	-	KPC-3	-	aph3-Ia.v1^;armA	-	-	-	Mrx;mphA;mphE.v2;msrE	catA1^	-	sul1	-	-	dfrA12	TEM-1D.v1^	-	SHV-11	35Q	OmpK35-25%;OmpK36GD	MgrB-79%	GyrA-83I;ParC-80I	KL107	unknown (KL107)	-	Typeable	99.96%	-	O1/O2v2	O2afg	-	Typeable
102579	2021-11-24	Georgia	Blood	ST147	no	no	SAMN54588115	-	0	-	0	-	0	-	0	-	0	-	-	NDM-1	-	aph(3')-VI;armA	-	-	qnrS1	mphE.v2;msrE	-	-	sul1;sul2	-	-	dfrA5	-	-	SHV-11^	35Q	-	-	GyrA-83I;ParC-80I	KL20	K20	-	Typeable	99.97%	-	O1/O2v1	O2a	-	Typeable
102580	2021-11-24	Georgia	Urine	ST395	no	no	SAMN54588116	ybt 16; ICEKp12 (truncated)	530-4LV	-	0	-	0	-	0	-	0	-	-	OXA-48	CTX-M-15	aac(6')-Ib-cr.v2;aph(3')-VIa*	-	-	qnrS1	-	catA1^	-	sul1	tet(A).v1	-	dfrA1.v1	OXA-1;TEM-103?	-	SHV-11	35Q	OmpK35-72%;OmpK36GD	-	GyrA-83I;ParC-80I	KL2	K2	?2	Typeable	99.84%	-	O1/O2v1	O1ab	?2	Typeable
102581	2021-11-24	Georgia	Urine	ST395	no	no	SAMN54588117	ybt 16; ICEKp12 (truncated)	530-4LV	-	0	-	0	-	0	-	0	-	-	OXA-48	CTX-M-15	aac(6')-Ib-cr.v2;aph(3')-VIa*	-	-	qnrS1	-	catA1^	-	sul1	tet(A).v1	-	dfrA1.v1	OXA-1;TEM-103?	-	SHV-11	35Q	OmpK35-72%;OmpK36GD	-	GyrA-83I;ParC-80I	KL2	K2	?2-	Typeable	99.81%	KL2_04_wza;KL2_03_wzi;KL2_05_wzb	O1/O2v1	O1ab	?2	Typeable
102601	2021-12-07	Georgia	Urine	ST15	no	no	SAMN54588118	ybt 16; ICEKp12	448-3LV	-	0	-	0	-	0	-	0	-	-	NDM-5	CTX-M-15	aadA2^;rmtB	-	-	-	-	catII.2*	-	sul1	-	-	dfrA12^	TEM-1D.v1^	-	SHV-28^	-	OmpK35-49%;OmpK36GD	-	GyrA-83F;GyrA-87A;ParC-80I	KL19	K19	?2	Typeable	98.04%	-	O1/O2v2	O2afg	-	Typeable
102602	2021-12-07	Georgia	Blood	ST395	yes	no	SAMN54588119	ybt 16; ICEKp12 (truncated)	530-4LV	-	0	iuc 1	63	-	0	rmp 1; KpVP-1	147	rmpA2_6*-47%	peg-344	NDM-1;OXA-48	CTX-M-15	aac(6')-Ib-cr.v2;armA	-	-	qnrS1	Mrx;mphA*;mphE.v2;msrE	catA1^	-	sul1;sul2	tet(A).v1*	-	dfrA1.v1;dfrA5	OXA-1;TEM-1D.v1^	-	SHV-11	35Q	OmpK35-72%;OmpK36GD	MgrB-62%	GyrA-83I;ParC-80I	KL2	K2	?2	Typeable	99.84%	-	O1/O2v1	O1ab	?2	Typeable
102603	2021-12-07	Georgia	Blood	ST395	no	no	SAMN54588120	ybt 16; ICEKp12 (truncated)	530-4LV	-	0	-	0	-	0	-	0	-	-	OXA-48	CTX-M-15	aac(6')-Ib-cr.v2;aph(3')-VIa*;armA	-	-	qnrS1	mphE.v2;msrE	catA1^	-	sul1	tet(A).v1	-	dfrA1.v1	OXA-1;TEM-1D.v1^	-	SHV-11	35Q	OmpK35-72%;OmpK36GD	MgrB-62%	GyrA-83I;ParC-80I	KL2	K2	?2	Typeable	99.82%	-	O1/O2v1	O1ab	?2	Typeable
102604	2021-12-07	Georgia	Blood	ST610	no	no	SAMN54588121	ybt 9; ICEKp3	209-1LV	-	0	-	0	-	0	-	0	-	-	NDM-5	CTX-M-3;VEB-1	aac(6')-Ia*;aadA*;ant(2'')-Ia;rmtB	-	-	-	-	cmlA5	arr-2	sul1	-	-	-	OXA-1;OXA-10;TEM-1D.v1^	-	SHV-11^	35Q	-	-	-	KL55	K55	-	Typeable	98.83%	-	O3/O3a	O3/O3a	!	Typeable
102605	2021-12-20	Georgia	Blood	ST610	no	no	SAMN54588122	ybt 9; ICEKp3	209-1LV	-	0	-	0	-	0	-	0	-	-	NDM-5	CTX-M-3*	aadA*;aadA2^;rmtB	-	-	-	-	-	-	sul1	-	-	dfrA12^	OXA-1;TEM-1D.v1^	-	SHV-11^	35Q	-	-	-	KL55	K55	-	Typeable	98.83%	-	O3/O3a	O3/O3a	-	Typeable
102607	2021-12-20	Georgia	Respiratory	ST395	yes	no	SAMN54588123	ybt 16; ICEKp12 (truncated)	530-4LV	-	0	iuc 1	63	-	0	rmp 1; KpVP-1	147-1LV	rmpA2_6*-47%	peg-344	NDM-1;OXA-48	CTX-M-15	aac(6')-Ib-cr.v2;armA	-	-	qnrS1	Mrx;mphA*;mphE.v2;msrE	catA1^	-	sul1;sul2	tet(A).v1	-	dfrA1.v1;dfrA5	OXA-1;TEM-1D.v1^	-	SHV-11	35Q	OmpK35-72%;OmpK36GD	MgrB-74%	GyrA-83I;ParC-80I	KL2	K2	?2	Typeable	99.84%	-	O1/O2v1	O1ab	?2	Typeable
102617	2021-12-21	Georgia	Blood	ST23-KL57	yes	no	SAMN54588124	ybt 9; ICEKp3 (truncated)	583-1LV	-	0	iuc 1	1	-	0	-	0	rmpA2_8*-60%	peg-344	NDM-5;OXA-48	CTX-M-15;SHV-5	aac(3)-IIa.v1^;aac(6')-Ib3^;aadA2^;armA;strA.v1^;strB.v1	-	-	qnrB1.v2^	mphE.v2;msrE	catII.2*	-	sul1;sul2	-	-	dfrA12;dfrA14.v2*	TEM-1D.v1^	-	-	-	OmpK35-22%;OmpK36GD	-	GyrA-83I;ParC-80I	KL57	K57	?3!	Typeable	99.51%	-	O1/O2v2	O2afg	!	Typeable
102618	2021-12-21	Georgia	Respiratory	ST395	yes	no	SAMN54588125	ybt 16; ICEKp12 (truncated)	530-4LV	-	0	iuc 1	63	-	0	rmp 1; KpVP-1	147	rmpA2_6*-47%	peg-344	NDM-1;OXA-48	CTX-M-15	aac(6')-Ib-cr.v2;armA	-	-	qnrS1	Mrx;mphA*;mphE.v2;msrE	catA1^	-	sul1;sul2	tet(A).v1	-	dfrA1.v1;dfrA5	OXA-1;TEM-1D.v1^	-	SHV-11	35Q	OmpK35-72%;OmpK36GD	MgrB-62%	GyrA-83I;ParC-80I	KL2	K2	?2	Typeable	99.84%	-	O1/O2v1	O1ab	?2	Typeable
102619	2021-12-21	Georgia	Respiratory	ST290	no	no	SAMN54588126	ybt 14; ICEKp5	393-1LV	-	0	-	0	-	0	-	0	-	-	-	CTX-M-14	aac(3)-IId^;strA.v1^;strB.v1	-	-	qnrS1	-	catII.2*	-	sul1;sul2	tet(A).v1;tet(D)	-	dfrA1.v1	LAP-2	-	SHV-1	-	-	-	-	KL21	K21	-	Typeable	99.31%	-	O1/O2v1	O1ab	!	Typeable
102620	2021-12-21	Georgia	Blood	ST395	yes	no	SAMN54588127	ybt 16; ICEKp12	530-2LV	-	0	iuc 3	88	-	0	-	0	-	-	NDM-5	CTX-M-15	rmtB	-	-	qnrS1	-	catA1^	-	sul1	tet(A).v1	-	dfrA1.v1	-	-	SHV-11	35Q	OmpK35-72%	-	GyrA-83I;ParC-80I	KL2	K2	-	Typeable	99.84%	-	O1/O2v1	O2a	-	Typeable
102621	2021-12-21	Georgia	Urine	ST395	yes	no	SAMN54588128	ybt 16; ICEKp12 (truncated)	530-4LV	-	0	iuc 1	63	-	0	-	0	rmpA2_6*-47%	-	NDM-1;OXA-48	CTX-M-15	aac(6')-Ib-cr.v2;armA	-	-	qnrS1	Mrx;mphA*;mphE.v2;msrE	catA1^	-	sul1;sul2	tet(A).v1	-	dfrA1.v1;dfrA5	OXA-1;TEM-1D.v1^	-	SHV-11	35Q	OmpK35-72%;OmpK36GD	MgrB-62%	GyrA-83I;ParC-80I	KL2	K2	?2	Typeable	99.84%	-	O1/O2v1	O1ab	?2	Typeable
102622	2021-12-21	Georgia	Respiratory	ST395	yes	yes	SAMN54588129	ybt 16; ICEKp12 (truncated)	530-4LV	-	0	iuc 1	63	-	0	rmp 1; KpVP-1	147	rmpA2_6*-47%	peg-344	OXA-48	CTX-M-15	aac(6')-Ib-cr.v2;aph(3')-VIa*;armA	-	-	qnrS1	Mrx;mphA*;mphE.v2;msrE	CatB4.v1;catA1^	-	sul1	tet(A).v1	-	dfrA1.v1;dfrA5	OXA-1;TEM-1D.v1^	-	SHV-11	35Q	OmpK35-72%;OmpK36GD	MgrB-62%	GyrA-83I;ParC-80I	KL2	K2	?2	Typeable	99.84%	-	O1/O2v1	O1ab	?2	Typeable
102623	2021-12-21	Georgia	Respiratory	ST395	yes	no	SAMN54588130	ybt 16; ICEKp12 (truncated)	530-4LV	-	0	iuc 1	63	-	0	rmp 1; KpVP-1	147-1LV	rmpA2_6*-47%	peg-344	NDM-1;OXA-48	CTX-M-15	aac(6')-Ib-cr.v2;armA	-	-	qnrS1	Mrx;mphA*;mphE.v2;msrE	catA1^	-	sul1;sul2	tet(A).v1*	-	dfrA1.v1;dfrA5	OXA-1;TEM-1D.v1^	-	SHV-11	35Q	OmpK35-72%;OmpK36GD	MgrB-62%	GyrA-83I;ParC-80I	KL2	K2	?2	Typeable	99.84%	-	O1/O2v1	O1ab	?2	Typeable
908343	2021-01-11	Georgia	Respiratory	ST23-KL57	yes	yes	SAMN54589364	ybt 9; ICEKp3 (truncated)	583-1LV	-	0	iuc 1	1	-	0	-	0	rmpA2_8*-60%	peg-344	NDM-5;OXA-48	CTX-M-15;SHV-12	aac(3)-IIa.v1^;aac(6')-Ib-cr5^;armA;strA.v1^;strB.v1	-	-	qnrB1.v2^	mphE.v2;msrE	-	-	sul1;sul2	-	-	dfrA12;dfrA14.v2*	OXA-1;TEM-1D.v1^	-	-	-	OmpK35-22%;OmpK36GD	MgrB-57%	GyrA-83I;ParC-80I	KL57	K57	?3!	Typeable	99.48%	-	O1/O2v2	O2afg	!	Typeable
908271	2021-01-11	Georgia	Blood	ST23-KL57	yes	yes	SAMN54589357	ybt 9; ICEKp3 (truncated)	583-1LV	-	0	iuc 1	1	-	0	-	0	rmpA2_8*-60%	peg-344	OXA-48	CTX-M-15;SHV-12	aac(3)-IIa.v1^;aadA2^;armA;strA.v1^;strB.v1	-	-	qnrB1.v2^	mphE.v2;msrE	-	-	sul1;sul2	-	-	dfrA12;dfrA14.v2*	OXA-1;TEM-1D.v1^	-	-	238S;240K;35Q	OmpK35-22%;OmpK36GD	MgrB-55%	GyrA-83I;ParC-80I	KL57	K57	?2!	Typeable	99.49%	-	O1/O2v2	O2afg	!	Typeable
908247	2021-01-11	Georgia	Blood	ST395	yes	yes	SAMN54589355	ybt 16; ICEKp12 (truncated)	530-4LV	-	0	iuc 1	63	-	0	rmp 1; KpVP-1	147	rmpA2_6*-47%	peg-344	NDM-1;OXA-48	CTX-M-15	aac(6')-Ib-cr.v2;armA	-	-	qnrS1	Mrx;mphA*;mphE.v2;msrE	catA1^	-	sul1;sul2	tet(A).v1	-	dfrA1.v1;dfrA5	OXA-1;TEM-1D.v1^	-	SHV-11	35Q	OmpK35-72%;OmpK36GD	MgrB-62%	GyrA-83I;ParC-80I	KL2	K2	?2	Typeable	99.84%	-	O1/O2v1	O1ab	?2	Typeable
1005401	2021-07-27	Georgia	Blood	ST395	yes	yes	SAMN54589483	ybt 16; ICEKp12 (truncated)	530-4LV	-	0	iuc 1	63	-	0	rmp 1; KpVP-1	147	rmpA2_6*-47%	peg-344	NDM-1;OXA-48	-	aac(6')-Ib-cr.v2;aph(3')-VIa*;armA	-	-	qnrS1	Mrx;mphA*;mphE.v2;msrE	CatB4.v1	-	sul1;sul2	tet(A).v1	-	dfrA1.v1;dfrA5	OXA-1;TEM-1D.v1^	-	SHV-11	35Q	OmpK35-72%;OmpK36GD	MgrB-62%	GyrA-83I;ParC-80I	KL2	K2	?2	Typeable	99.84%	-	O1/O2v1	O1ab	?2	Typeable
1005637	2021-08-24	Georgia	Blood	ST395	yes	yes	SAMN54589490	ybt 16; ICEKp12	530-3LV	-	0	iuc 1	95	-	0	-	0	rmpA2 ONT call	-	OXA-244	CTX-M-15	aac(6')-Ib-cr.v2	-	-	qnrS1	-	catA1^	-	sul1	tet(A).v1	-	dfrA1.v1	OXA-1;TEM-1D.v1^	-	SHV-11	35Q	OmpK35-72%;OmpK36GD	-	GyrA-83I;ParC-80I	KL2	K2	?2	Typeable	99.84%	-	O1/O2v1	O1ab	?2	Typeable
803958	2018-02-22	Georgia	Blood	ST395	yes	yes	SAMN54588910	ybt 16; ICEKp12	530-2LV	-	0	iuc 1	95	-	0	-	0	rmpA2 ONT call	-	OXA-48	CTX-M-15	aadA*;aadA5;ant(2'')-Ia;armA	-	-	qnrS1	mphE.v2;msrE*	catA1^	-	sul1	-	-	dfrA17	TEM-1D.v1^	-	SHV-1^	-	OmpK35-72%;OmpK36_c25t	-	GyrA-83I;ParC-80I	KL2	K2	?2	Typeable	99.84%	-	O1/O2v1	O1ab	?2!	Typeable
804398	2019-02-07	Georgia	Blood	ST48	yes	yes	SAMN54588954	ybt 14; ICEKp5	595-2LV	-	0	iuc 1	1	-	0	-	0	rmpA2 ONT call	-	NDM-5	CTX-M-15	aac(6')-Ib-cr.v2;aadA*;aadA2^;ant(2'')-Ia	-	-	-	-	catA1^	-	sul1	-	-	dfrA12^	-	-	SHV-1^	-	-	-	GyrA-83F	KL62	K62	?2!	Typeable	99.82%	-	O1/O2v1	O1ab	-	Typeable
1004755	2019-01-09	Georgia	Device	ST15	yes	yes	SAMN54589468	ybt 16; ICEKp12	448-3LV	-	0	iuc 1	95	-	0	-	0	rmpA2 ONT call	-	OXA-48	CTX-M-15	aadA*;aadA16*;strA.v1*;strB.v1*	-	-	qnrB6^	-	catII.2*	arr-3	sul1;sul2	-	-	dfrA27	-	-	SHV-28^	-	OmpK35-49%;OmpK36GD	MgrB-51%	GyrA-83F;GyrA-87A;ParC-80I	KL19	K19	?2	Typeable	98.04%	-	O1/O2v2	O1ab	?2-	Typeable
1005419	2021-07-27	Georgia	Respiratory	ST395	yes	yes	SAMN54589484	ybt 16; ICEKp12	530-2LV	-	0	iuc 3	88	-	0	-	0	-	-	NDM-5	CTX-M-15	aac(6')-Ib-cr.v2	-	-	qnrS1	-	catA1^	-	sul1	tet(A).v1	-	dfrA1.v1	OXA-1;TEM-1D.v1^	-	SHV-11	35Q	OmpK35-72%	-	GyrA-83I;ParC-80I	KL2	K2	-	Typeable	99.83%	-	O1/O2v1	O2a	-	Typeable
908553	2021-03-09	Georgia	Respiratory	ST395	yes	yes	SAMN54589385	ybt 16; ICEKp12	530-2LV	-	0	iuc 3	88	-	0	-	0	-	-	NDM-5	CTX-M-15	rmtB	-	-	qnrS1	-	catA1^	-	sul1	tet(A).v1	-	dfrA1.v1	-	-	SHV-11	35Q	OmpK35-72%	-	GyrA-83I;ParC-80I	KL2	K2	-	Typeable	99.84%	-	O1/O2v1	O2a	-	Typeable
804478	2019-05-10	Georgia	Urine	ST5351	yes	yes	SAMN54588961	ybt 16; ICEKp12	530-2LV	-	0	iuc 3	88	-	0	-	0	-	-	-	CTX-M-15	aadA*	-	-	-	-	-	-	sul1	tet(A).v1	-	dfrA1.v1	OXA-1;TEM-1D.v1^	-	SHV-11	35Q	OmpK35-72%	-	GyrA-83I;ParC-80I	KL2	K2	-	Typeable	99.84%	-	O1/O2v1	O2a	-	Typeable
862392	2020-03-27	Georgia	Urine	ST25	yes	yes	SAMN54589077	ybt 2; ICEKp1	323	-	0	iuc 3	64	iro 3 (truncated) Chrm	25	rmp 3; ICEKp1 (truncated) Chrm	0	-	peg-344	NDM-5	-	-	-	-	-	-	-	-	-	-	-	-	-	-	SHV-11^	35Q	-	-	-	KL2	K2	-	Typeable	99.56%	-	O1/O2v2	O1ab	-	Typeable
862502	2020-04-21	Georgia	Urine	ST395	yes	no	SAMN54589088	ybt 16; ICEKp12 (truncated)	530-4LV	-	0	iuc 1	63	-	0	rmp 1; KpVP-1	147-1LV	-	peg-344	NDM-1;OXA-48	CTX-M-15	aac(6')-Ib-cr.v2;armA	-	-	qnrS1	Mrx;mphA*;mphE.v2;msrE	catA1^	-	sul1;sul2	-	-	dfrA5	OXA-1;TEM-1D.v1^	-	SHV-11	35Q	OmpK35-72%;OmpK36GD	-	GyrA-83I;ParC-80I	KL2	K2	?2	Typeable	99.84%	-	O1/O2v1	O1ab	?2	Typeable
908183	2020-12-15	Georgia	Respiratory	ST395	yes	no	SAMN54589349	ybt 16; ICEKp12 (truncated)	530-4LV	-	0	iuc 1	63	-	0	rmp 1; KpVP-1	147-1LV	-	peg-344	NDM-1;OXA-48	CTX-M-15	aac(6')-Ib-cr.v2;armA	-	-	qnrS1	Mrx;mphA*;mphE.v2;msrE	catA1^	-	sul1;sul2	tet(A).v1	-	dfrA1.v1;dfrA5	OXA-1;TEM-1D.v1^	-	SHV-11	35Q	OmpK35-72%;OmpK36GD	MgrB-62%	GyrA-83I;ParC-80I	KL2	K2	?2	Typeable	99.84%	-	O1/O2v1	O1ab	?2	Typeable
908239	2021-01-11	Georgia	Blood	ST395	yes	no	SAMN54589354	ybt 16; ICEKp12 (truncated)	530-4LV	-	0	iuc 1	63	-	0	rmp 1; KpVP-1	147-1LV	-	peg-344	NDM-1;OXA-48	CTX-M-15	aac(6')-Ib-cr.v2;armA	-	-	qnrS1	Mrx;mphA*;mphE.v2;msrE	catA1^	-	sul1;sul2	tet(A).v1	-	dfrA1.v1;dfrA5	OXA-1;TEM-1D.v1^	-	SHV-11	35Q	OmpK35-72%;OmpK36GD	MgrB-62%	GyrA-83I;ParC-80I	KL2	K2	?2	Typeable	99.84%	-	O1/O2v1	O1ab	?2	Typeable
908301	2021-01-11	Georgia	Blood	ST395	yes	no	SAMN54589360	ybt 16; ICEKp12 (truncated)	530-4LV	-	0	iuc 1	63	-	0	rmp 1; KpVP-1	147	-	peg-344	NDM-1;OXA-48	CTX-M-15	aac(6')-Ib-cr.v2;armA	-	-	qnrS1	Mrx;mphA*;mphE.v2;msrE	catA1^	-	sul1;sul2	tet(A).v1	-	dfrA1.v1;dfrA5	OXA-1;TEM-1D.v1^	-	SHV-11	35Q	OmpK35-72%;OmpK36GD	MgrB-62%	GyrA-83I;ParC-80I	KL2	K2	?2	Typeable	99.84%	-	O1/O2v1	O1ab	?2	Typeable
908511	2021-02-23	Georgia	Urine	ST395	yes	no	SAMN54589381	ybt 16; ICEKp12 (truncated)	530-4LV	-	0	iuc 1	63	-	0	rmp 1; KpVP-1	147	rmpA2_6*-47%	peg-344	NDM-1	CTX-M-15	aac(6')-Ib-cr.v2;armA	-	-	qnrS1	Mrx;mphA*;mphE.v2;msrE	catA1^	-	sul1;sul2	tet(A).v1	-	dfrA1.v1;dfrA5	OXA-1;TEM-103?	-	SHV-11	35Q	OmpK35-72%;OmpK36GD	-	GyrA-83I;ParC-80I	KL2	K2	?2	Typeable	99.84%	-	O1/O2v1	O1ab	?2	Typeable
908423	2021-02-09	Georgia	Blood	ST395	yes	no	SAMN54589372	ybt 16; ICEKp12 (truncated)	530-4LV	-	0	iuc 1	63	-	0	rmp 1; KpVP-1	147	-	peg-344	NDM-1;OXA-48	CTX-M-15	aac(6')-Ib-cr.v2;armA	-	-	qnrS1	Mrx;mphA*;mphE.v2;msrE	catA1^	-	sul1;sul2	tet(A).v1	-	dfrA1.v1;dfrA5	OXA-1;TEM-1D.v1^	-	SHV-11	35Q	OmpK35-72%;OmpK36GD	MgrB-62%	GyrA-83I;ParC-80I	KL2	K2	?2	Typeable	99.84%	-	O1/O2v1	O1ab	?2	Typeable
908465	2021-02-23	Georgia	Wound	ST395	yes	no	SAMN54589376	ybt 16; ICEKp12 (truncated)	530-4LV	-	0	iuc 1	63	-	0	rmp 1; KpVP-1	147	-	peg-344	NDM-1;OXA-48	CTX-M-15	aac(6')-Ib-cr.v2;armA	-	-	qnrS1	Mrx;mphA*;mphE.v2;msrE	catA1^	-	sul1;sul2	tet(A).v1	-	dfrA1.v1;dfrA5	OXA-1;TEM-1D.v1^	-	SHV-11	35Q	OmpK35-72%;OmpK36GD	MgrB-62%	GyrA-83I;ParC-80I	KL2	K2	?2	Typeable	99.84%	-	O1/O2v1	O1ab	?2	Typeable
885008	2020-10-20	Georgia	Respiratory	ST395	yes	no	SAMN54589335	ybt 16; ICEKp12 (truncated)	530-4LV	-	0	iuc 1	63	-	0	rmp 1; KpVP-1 (incomplete)	147-1LV	rmpA2_6*-47%	-	NDM-1;OXA-48	CTX-M-15	aac(6')-Ib-cr.v2;armA	-	-	qnrS1	Mrx;mphA*;mphE.v2;msrE	catA1^	-	sul1;sul2	tet(A).v1	-	dfrA1.v1;dfrA5	OXA-1;TEM-1D.v1^	-	SHV-11	35Q	OmpK35-72%;OmpK36GD	-	GyrA-83I;ParC-80I	KL2	K2	?2	Typeable	99.84%	-	O1/O2v1	O1ab	?2	Typeable
908289	2021-01-11	Georgia	Blood	ST395	yes	no	SAMN54589358	ybt 16; ICEKp12 (truncated)	530-4LV	-	0	iuc 1	63	-	0	rmp 1; KpVP-1	147	rmpA2_6*-47%	peg-344	NDM-1;OXA-48	CTX-M-15	aac(6')-Ib-cr.v2;armA	-	-	qnrS1	Mrx;mphA*;mphE.v2;msrE	catA1^	-	sul1;sul2	tet(A).v1	-	dfrA1.v1;dfrA5	OXA-1;TEM-1D.v1^	-	SHV-11	35Q	OmpK35-72%;OmpK36GD	MgrB-62%	GyrA-83I;ParC-80I	KL2	K2	?2	Typeable	99.84%	-	O1/O2v1	O1ab	?2	Typeable
908393	2021-01-25	Georgia	Blood	ST395	yes	no	SAMN54589369	ybt 16; ICEKp12 (truncated)	530-4LV	-	0	iuc 1	63	-	0	rmp 1; KpVP-1	147	rmpA2_6*-47%	peg-344	NDM-1;OXA-48	CTX-M-15	aac(6')-Ib-cr.v2;armA	-	-	qnrS1	Mrx;mphA*;mphE.v2;msrE	catA1^	-	sul1;sul2	tet(A).v1	-	dfrA1.v1;dfrA5	OXA-1;TEM-1D.v1^	-	SHV-11	35Q	OmpK35-72%;OmpK36GD	MgrB-62%	GyrA-83I;ParC-80I	KL2	K2	?2	Typeable	99.84%	-	O1/O2v1	O1ab	?2	Typeable
1005839	2021-09-17	Georgia	Blood	ST23-KL57	yes	no	SAMN54589498	ybt 9; ICEKp3 (truncated)	583-1LV	-	0	iuc 1	1	-	0	-	0	rmpA2_8*-60%	peg-344	NDM-5;OXA-48	CTX-M-15	aac(3)-IIa.v1^;aac(6')-Ib3^;aadA2^;armA;strA.v1^	-	-	qnrB1.v2^	mphE.v2;msrE	catII.2*	-	sul1;sul2	-	-	dfrA12;dfrA14.v2*	TEM-1D.v1^	-	-	-	OmpK35-22%;OmpK36GD	-	GyrA-83I;ParC-80I	KL57	K57	?2!	Typeable	99.49%	-	O1/O2v2	O2afg	!	Typeable
1005427	2021-07-27	Georgia	Respiratory	ST23-KL57	yes	no	SAMN54589485	ybt 9; ICEKp3 (truncated)	583-1LV	-	0	iuc 1	1	-	0	-	0	rmpA2_8*-60%	peg-344	OXA-48	-	aac(3)-IIa.v1^;aac(6')-Ib-cr5^;aadA2^;armA;strA.v1^;strB.v1	-	-	qnrB1.v2^	mphE.v2;msrE	catII.2*	-	sul1;sul2	-	-	dfrA12;dfrA14.v2*	OXA-1;TEM-1D.v1^	-	SHV-1^	-	OmpK35-22%;OmpK36GD	-	GyrA-83I;ParC-80I	KL57	K57	?2!	Typeable	99.49%	-	O1/O2v2	O2afg	!	Typeable
908351	2021-01-11	Georgia	Urine	ST23-KL57	yes	no	SAMN54589365	ybt 9; ICEKp3 (truncated)	583-1LV	-	0	iuc 1	1	-	0	-	0	rmpA2_8*-60%	peg-344	OXA-48	CTX-M-15	aac(6')-Ib3^;aadA2^;armA	-	-	-	mphE.v2;msrE	-	-	sul1	-	-	dfrA12;dfrA14.v2*	-	-	SHV-11^	35Q	OmpK35-22%;OmpK36GD	MgrB-57%	GyrA-83I;ParC-80I	KL57	K57	?3!	Typeable	99.49%	-	O1/O2v2	O2afg	!	Typeable
908609	2021-03-23	Georgia	Respiratory	ST23-KL57	yes	no	SAMN54589390	ybt 9; ICEKp3 (truncated)	583-1LV	-	0	iuc 1	1	-	0	-	0	rmpA2_8*-60%	peg-344	OXA-48	CTX-M-15	aac(3)-IIa.v1^;aac(6')-Ib-cr5*;aadA2^;armA;strA.v1^;strB.v1	-	-	qnrB1.v2^	mphE.v2;msrE	-	-	sul1;sul2	-	-	dfrA12;dfrA14.v2*	OXA-1;TEM-1D.v1^	-	SHV-1^	-	OmpK35-22%;OmpK36GD	-	GyrA-83I;ParC-80I	KL57	K57	?2-!	Typeable	99.58%	KL57_03_wzi	O1/O2v2	O2afg	!	Typeable
908335	2021-01-11	Georgia	Blood	ST23-KL57	yes	no	SAMN54589363	ybt 9; ICEKp3 (truncated)	583-1LV	-	0	iuc 1	1	-	0	-	0	rmpA2_8*-60%	peg-344	OXA-48	CTX-M-15	aac(3)-IIa.v1^;aac(6')-Ib-cr5*;aadA2^;armA;strA.v1^;strB.v1	-	-	qnrB1.v2^	mphE.v2;msrE	-	-	sul1;sul2	-	-	dfrA12;dfrA14.v2*	OXA-1;TEM-1D.v1^	-	-	-	OmpK35-22%;OmpK36GD	MgrB-57%	GyrA-83I;ParC-80I	KL57	K57	?2!	Typeable	99.49%	-	O1/O2v2	O2afg	!	Typeable
908457	2021-02-09	Georgia	Blood	ST395	yes	no	SAMN54589375	ybt 16; ICEKp12 (truncated)	530-4LV	-	0	iuc 1	63	-	0	rmp 1; KpVP-1	147-1LV	rmpA2_6*-47%	peg-344	NDM-1;OXA-48	CTX-M-15	aac(6')-Ib-cr.v2;armA	-	-	qnrS1	Mrx;mphA*;mphE.v2;msrE	catA1^	-	sul1;sul2	tet(A).v1	-	dfrA1.v1;dfrA5	OXA-1;TEM-1D.v1^	-	SHV-11	35Q	OmpK35-72%;OmpK36GD	MgrB-62%	GyrA-83I;ParC-80I	KL2	K2	?3	Typeable	99.85%	-	O1/O2v1	O1ab	?2	Typeable
884878	2020-08-11	Georgia	Blood	ST23-KL57	yes	no	SAMN54589322	ybt 9; ICEKp3 (truncated)	583-1LV	-	0	iuc 1	1	-	0	-	0	rmpA2_8*-60%	peg-344	OXA-48	CTX-M-15	aac(3)-IIa.v1^;aac(6')-Ib3^;aadA2^;armA;strA.v1^;strB.v1	-	-	qnrB1.v2^	mphE.v2;msrE	catII.2*	-	sul1;sul2	-	-	dfrA12;dfrA14.v2*	OXA-1;TEM-1D.v1^	-	-	-	OmpK35-22%;OmpK36GD	-	GyrA-83I;ParC-80I	KL57	K57	?2!	Typeable	99.49%	-	O1/O2v2	O2afg	!	Typeable
908431	2021-02-09	Georgia	Swab	ST395	yes	no	SAMN54589373	ybt 16; ICEKp12 (truncated)	530-4LV	-	0	iuc 1	63	-	0	rmp 1; KpVP-1	147	-	peg-344	OXA-48	CTX-M-15	aac(6')-Ib-cr.v2;aph(3')-VIa*;armA	-	-	qnrS1	Mrx;mphA*;mphE.v2;msrE	catA1^	-	sul1	tet(A).v1	-	dfrA1.v1;dfrA5	OXA-1;TEM-1D.v1^	-	SHV-11	35Q	OmpK35-72%;OmpK36GD	MgrB-62%	GyrA-83I;ParC-80I	KL2	K2	?2	Typeable	99.84%	-	O1/O2v1	O1ab	?2	Typeable
908529	2021-02-23	Georgia	Blood	ST395	yes	no	SAMN54589382	ybt 16; ICEKp12 (truncated)	530-4LV	-	0	iuc 1	63	-	0	rmp 1; KpVP-1	147	rmpA2_6*-47%	peg-344	NDM-1;OXA-48	CTX-M-15	aac(6')-Ib-cr.v2;armA	-	-	qnrS1	Mrx;mphA*;mphE.v2;msrE	catA1^	-	sul1;sul2	tet(A).v1	-	dfrA1.v1;dfrA5	OXA-1;TEM-1D.v1^	-	SHV-11	35Q	OmpK35-72%;OmpK36GD	MgrB-62%	GyrA-83I;ParC-80I	KL2	K2	?2	Typeable	99.84%	-	O1/O2v1	O1ab	?2	Typeable
1005695	2021-08-24	Georgia	Urine	ST395	yes	no	SAMN54589496	ybt 16; ICEKp12 (truncated)	530-4LV	-	0	iuc 1	63	-	0	rmp 1; KpVP-1	147	rmpA2_6*-47%	peg-344	NDM-1;OXA-48	CTX-M-15	aac(6')-Ib-cr.v2;armA	-	-	qnrS1	Mrx;mphA*;mphE.v2;msrE	catA1^	-	sul1;sul2	tet(A).v1	-	dfrA1.v1;dfrA5	OXA-1;TEM-1D.v1^	-	SHV-11	35Q	OmpK35-72%;OmpK36GD	MgrB-62%	GyrA-83I;ParC-80I	KL2	K2	?2	Typeable	99.84%	-	O1/O2v1	O1ab	?2	Typeable
884958	2020-10-06	Georgia	Blood	ST23-KL57	yes	no	SAMN54589330	ybt 9; ICEKp3 (truncated)	583-1LV	-	0	iuc 1	1	-	0	-	0	rmpA2_8*-60%	peg-344	OXA-48	CTX-M-15;SHV-12	aac(3)-IIa.v1^;aac(6')-Ib3^;aadA2^;armA;strA.v1^;strB.v1	-	-	qnrB1.v2^	mphE.v2;msrE	catII.2*	-	sul1;sul2	-	-	dfrA12;dfrA14.v2*	OXA-1;TEM-1D.v1^	-	-	-	OmpK35-22%;OmpK36GD	-	GyrA-83I;ParC-80I	KL57	K57	?2!	Typeable	99.49%	-	O1/O2v2	O2afg	!	Typeable
1005573	2021-08-10	Georgia	Respiratory	ST395	yes	no	SAMN54589487	ybt 16; ICEKp12 (truncated)	530-4LV	-	0	iuc 1	63	-	0	rmp 1; KpVP-1	147-1LV	rmpA2_6*-47%	peg-344	NDM-1;OXA-48	CTX-M-15	aac(6')-Ib-cr.v2;armA	-	-	qnrS1	Mrx;mphA*;mphE.v2;msrE	catA1^	-	sul1;sul2	tet(A).v1	-	dfrA1.v1;dfrA5	OXA-1;TEM-103?	-	SHV-11	35Q	OmpK35-72%;OmpK36GD	-	GyrA-83I;ParC-80I	KL2	K2	?2	Typeable	99.84%	-	O1/O2v1	O1ab	?2	Typeable
884772	2020-06-30	Georgia	Urine	ST395	yes	no	SAMN54589312	ybt 16; ICEKp12 (truncated)	530-4LV	-	0	iuc 1	63	-	0	rmp 1; KpVP-1	147	rmpA2_6*-60%	peg-344	OXA-48	-	aac(6')-Ib-cr.v2;armA	-	-	-	mphE.v2;msrE	catA1^	-	-	-	-	-	OXA-1;TEM-1D.v1^	-	SHV-11	35Q	OmpK35-72%;OmpK36GD	-	GyrA-83I;ParC-80I	KL2	K2	?2	Typeable	99.84%	-	O1/O2v1	O1ab	?2	Typeable
908407	2021-01-25	Georgia	Respiratory	ST395	yes	no	SAMN54589370	ybt 16; ICEKp12 (truncated)	530-4LV	-	0	iuc 1	63	-	0	rmp 1; KpVP-1	147-1LV	rmpA2_6*-60%	peg-344	OXA-48	CTX-M-15	armA	-	-	qnrS1	Mrx;mphA*;mphE.v2;msrE	catA1^	-	sul1;sul2	-	-	dfrA5	TEM-1D.v1^	-	SHV-11	35Q	OmpK35-72%;OmpK36GD	-	GyrA-83I;ParC-80I	KL2	K2	?2	Typeable	99.84%	-	O1/O2v1	O1ab	?2	Typeable
908369	2021-01-25	Georgia	Respiratory	ST395	yes	no	SAMN54589366	ybt 16; ICEKp12 (truncated)	530-4LV	-	0	iuc 1	63	-	0	rmp 1; KpVP-1	147	rmpA2_6*-47%	peg-344	OXA-48; NDM-1	CTX-M-15	aac(6')-Ib-cr.v2;armA	-	-	qnrS1	Mrx;mphA*;mphE.v2;msrE	catA1^	-	sul1;sul2	tet(A).v1	-	dfrA1.v1;dfrA5	OXA-1;TEM-1D.v1^	-	SHV-11	35Q	OmpK35-72%;OmpK36GD	MgrB-62%	GyrA-83I;ParC-80I	KL2	K2	?2	Typeable	99.84%	-	O1/O2v1	O1ab	?2	Typeable
861910	2020-01-08	Georgia	Urine	ST15	yes	no	SAMN54589029	ybt 16; ICEKp12	448-3LV	-	0	iuc 1	95	-	0	-	0	-	-	-	CTX-M-15	aadA*;strA.v1*;strB.v1*	-	-	qnrB6^	-	catII.2*	arr-3	sul1;sul2	-	-	dfrA27	-	-	SHV-28^	-	OmpK35-49%;OmpK36GD	MgrB-49%	GyrA-83F;GyrA-87A;ParC-80I	KL19	K19	?2	Typeable	98.04%	-	O1/O2v2	O1ab	?2-	Typeable
862480	2020-04-21	Georgia	Urine	ST15	yes	no	SAMN54589086	ybt 16; ICEKp12	448-3LV	-	0	iuc 1	95	-	0	-	0	-	-	-	CTX-M-15	aadA*;strA.v1*;strB.v1*	-	-	qnrB6^	-	catII.2*	arr-3	sul1;sul2	-	-	dfrA27	-	-	SHV-28^	-	OmpK35-49%;OmpK36GD	MgrB-60%	GyrA-83F;GyrA-87A;ParC-80I	KL19	K19	?2	Typeable	98.04%	-	O1/O2v2	O1ab	?2-	Typeable
884802	2020-07-14	Georgia	Wound	ST15	yes	no	SAMN54589315	ybt 16; ICEKp12	448-3LV	-	0	iuc 1	95-1LV	-	0	-	0	-	-	OXA-48	CTX-M-15	strA.v1*;strB.v1*	-	-	qnrB6^	-	catII.2*	arr-3	sul1;sul2	-	-	dfrA27	TEM-1D.v1^	-	SHV-28^	-	OmpK35-49%;OmpK36GD	MgrB-51%	GyrA-83F;GyrA-87A;ParC-80I	KL19	K19	?2	Typeable	98.04%	-	O1/O2v2	O1ab	?2-	Typeable
884908	2020-08-25	Georgia	Urine	ST15	yes	no	SAMN54589325	ybt 16; ICEKp12	448-3LV	-	0	iuc 1	95	-	0	-	0	-	-	OXA-48	CTX-M-15	aadA*;aadA16*;strA.v1*;strB.v1*	-	-	qnrB6^	-	catII.2*	arr-3	sul1;sul2	-	-	dfrA27	-	-	SHV-28^	-	OmpK35-49%;OmpK36GD	MgrB-60%	GyrA-83F;GyrA-87A;ParC-80I	KL19	K19	?2	Typeable	98.03%	-	O1/O2v2	O1ab	?2-	Typeable
1004907	2019-02-22	Georgia	Respiratory	ST15	yes	no	SAMN54589475	ybt 16; ICEKp12	448-3LV	-	0	iuc 1 (truncated)	95-1LV	-	0	-	0	-	-	OXA-48	CTX-M-15	aadA*;strA.v1*;strB.v1*	-	-	qnrB6^	-	catII.2*	arr-3	sul1;sul2	-	-	dfrA27	-	-	SHV-28^	-	OmpK35-49%;OmpK36GD	MgrB-51%	GyrA-83F;GyrA-87A;ParC-80I	KL19	K19	?2	Typeable	98.04%	-	O1/O2v2	O1ab	?2-	Typeable
1004763	2019-01-09	Georgia	Respiratory	ST15	yes	no	SAMN54589469	ybt 16; ICEKp12	448-3LV	-	0	iuc 1	95	-	0	-	0	-	-	OXA-48	CTX-M-15	aadA*;aadA16*;strA.v1*;strB.v1*	-	-	qnrB6^	-	catII.2*	arr-3	sul1;sul2	-	-	dfrA27	-	-	SHV-28^	-	OmpK35-49%;OmpK36GD	MgrB-51%	GyrA-83F;GyrA-87A;ParC-80I	KL19	K19	?2	Typeable	98.03%	-	O1/O2v2	O1ab	?2-	Typeable
1004797	2019-01-18	Georgia	Respiratory	ST15	yes	no	SAMN54589470	ybt 16; ICEKp12	448-3LV	-	0	iuc 1	95	-	0	-	0	-	-	OXA-48	CTX-M-15	aadA*;strA.v1*;strB.v1*	-	-	qnrB6^	-	catII.2*	arr-3	sul1;sul2	-	-	dfrA27	-	-	SHV-28^	-	OmpK35-49%;OmpK36GD	MgrB-51%	GyrA-83F;GyrA-87A;ParC-80I	KL19	K19	?2	Typeable	98.04%	-	O1/O2v2	O2afg	?2-	Typeable
884982	2020-10-06	Georgia	Respiratory	ST23-KL57	yes	no	SAMN54589333	ybt 9; ICEKp3 (truncated)	583-1LV	-	0	iuc 1	1	-	0	-	0	rmpA2_8*-60%	peg-344	OXA-48	CTX-M-15;SHV-12	aac(3)-IIa.v1^;aac(6')-Ib-cr5*;aadA2^;armA;strA.v1^;strB.v1	-	-	qnrB1.v2^	mphE.v2;msrE	catII.2*	-	sul1;sul2	-	-	dfrA12;dfrA14.v2*	OXA-1;TEM-1D.v1^	-	-	-	OmpK35-22%;OmpK36GD	-	GyrA-83I;ParC-80I	KL57	K57	?2!	Typeable	99.49%	-	O1/O2v2	O2afg	!	Typeable
1004801	2019-01-26	Georgia	Respiratory	ST15	yes	no	SAMN54589471	ybt 16; ICEKp12	448-3LV	-	0	iuc 1	95	-	0	-	0	-	-	OXA-48	CTX-M-15	aadA*;strA.v1*;strB.v1*	-	-	qnrB6^	-	catII.2*	arr-3	sul1;sul2	-	-	dfrA27	-	-	SHV-28^	-	OmpK35-49%;OmpK36GD	MgrB-51%	GyrA-83F;GyrA-87A;ParC-80I	KL19	K19	?2	Typeable	98.04%	-	O1/O2v2	O1ab	?2-	Typeable
1004827	2019-01-28	Georgia	Respiratory	ST15	yes	no	SAMN54589472	ybt 16; ICEKp12	448-3LV	-	0	iuc 1	95	-	0	-	0	-	-	OXA-48	CTX-M-15	aadA*;strA.v1*;strB.v1*	-	-	qnrB6^	-	catII.2*	arr-3	sul1;sul2	-	-	dfrA27	-	-	SHV-28^	-	OmpK35-49%;OmpK36GD	MgrB-51%	GyrA-83F;GyrA-87A;ParC-80I	KL19	K19	?2	Typeable	98.04%	-	O1/O2v2	O1ab	?2-	Typeable
1004877	2019-02-10	Georgia	Respiratory	ST15	yes	no	SAMN54589473	ybt 16; ICEKp12	448-3LV	-	0	iuc 1	95	-	0	-	0	-	-	OXA-48	CTX-M-15	aadA*;aadA16*;strA.v1*;strB.v1*	-	-	qnrB6^	-	catII.2*	arr-3	sul1;sul2	-	-	dfrA27	-	-	SHV-28^	-	OmpK35-49%;OmpK36GD	MgrB-51%	GyrA-83F;GyrA-87A;ParC-80I	KL19	K19	?2	Typeable	98.04%	-	O1/O2v2	O1ab	?2-	Typeable
1004893	2019-02-15	Georgia	Respiratory	ST15	yes	no	SAMN54589474	ybt 16; ICEKp12	448-3LV	-	0	iuc 1	95	-	0	-	0	-	-	OXA-48	CTX-M-15	aadA*;strA.v1*;strB.v1*	-	-	qnrB6^	-	catII.2*	arr-3	sul1;sul2	-	-	dfrA27	-	-	SHV-28^	-	OmpK35-49%;OmpK36GD	MgrB-51%	GyrA-83F;GyrA-87A;ParC-80I	KL19	K19	?2	Typeable	98.03%	-	O1/O2v2	O1ab	?2-	Typeable
804436	2019-02-14	Georgia	Urine	ST15	yes	no	SAMN54588958	ybt 16; ICEKp12	448-3LV	-	0	iuc 1	95	-	0	-	0	-	-	OXA-48	-	aadA*;strA.v1*;strB.v1*	-	-	qnrB6^	-	catII.2*	arr-3	sul1;sul2	-	-	dfrA27	-	-	SHV-28^	-	OmpK35-49%;OmpK36GD	MgrB-51%	GyrA-83F;GyrA-87A;ParC-80I	KL19	K19	?2	Typeable	98.04%	-	O1/O2v2	O1ab	?2-	Typeable
862052	2020-01-21	Georgia	Respiratory	ST395	yes	no	SAMN54589043	ybt 16; ICEKp12	530-2LV	-	0	iuc 3	88	-	0	-	0	-	-	NDM-5	CTX-M-15	aac(6')-Ib-cr.v2*?;aadA*	-	-	qnrS1	-	catA1^	-	sul1	tet(A).v1	-	dfrA1.v1	OXA-1	TEM-122*	SHV-11	35Q	OmpK35-72%	-	GyrA-83I;ParC-80I	KL2	K2	-	Typeable	99.84%	-	O1/O2v1	O2a	-	Typeable
861452	2020-04-07	Georgia	Urine	ST395	yes	no	SAMN54589011	ybt 16; ICEKp12	530-2LV	-	0	iuc 3	88	-	0	-	0	-	-	NDM-5	CTX-M-15	aac(6')-Ib-cr.v2	-	-	qnrS1	-	catA1^	-	sul1	tet(A).v1	-	dfrA1.v1	OXA-1;TEM-1D.v1^	-	SHV-11	35Q	OmpK35-72%	-	GyrA-83I;ParC-80I	KL2	K2	-	Typeable	99.84%	-	O1/O2v1	O2a	-	Typeable
861460	2020-04-07	Georgia	Respiratory	ST395	yes	no	SAMN54589012	ybt 16; ICEKp12	530-2LV	-	0	iuc 3	88	-	0	-	0	-	-	NDM-5	CTX-M-15	aac(6')-Ib-cr.v2	-	-	qnrS1	-	catA1^	-	sul1	tet(A).v1	-	dfrA1.v1	OXA-1;TEM-1D.v1^	-	SHV-11	35Q	OmpK35-72%	-	GyrA-83I;ParC-80I	KL2	K2	-	Typeable	99.84%	-	O1/O2v1	O2a	-	Typeable
861478	2020-04-21	Georgia	Blood	ST395	yes	no	SAMN54589013	ybt 16; ICEKp12	530-2LV	-	0	iuc 3	88	-	0	-	0	-	-	NDM-5	CTX-M-15	aac(6')-Ib-cr.v2	-	-	qnrS1	-	catA1^	-	sul1	tet(A).v1	-	dfrA1.v1	OXA-1;TEM-1D.v1^	-	SHV-11	35Q	OmpK35-72%	-	GyrA-83I;ParC-80I	KL2	K2	-	Typeable	99.84%	-	O1/O2v1	O2a	-	Typeable
861486	2020-01-08	Georgia	Respiratory	ST395	yes	no	SAMN54589014	ybt 16; ICEKp12	530-2LV	-	0	iuc 3	88	-	0	-	0	-	-	NDM-5	CTX-M-15	aadA*	-	-	qnrS1	-	catA1^	-	sul1	tet(A).v1	-	dfrA1.v1	OXA-1;TEM-1D.v1^	-	SHV-11	35Q	OmpK35-72%	-	GyrA-83I;ParC-80I	KL2	K2	-	Typeable	99.84%	-	O1/O2v1	O2a	-	Typeable
861960	2020-01-08	Georgia	Blood	ST395	yes	no	SAMN54589034	-	0	-	0	iuc 3	88	-	0	-	0	-	-	NDM-5	CTX-M-15	aadA*	-	-	qnrS1	-	catA1^	-	sul1	tet(A).v1	-	dfrA1.v1	OXA-1;TEM-1D.v1^	-	SHV-11	35Q	OmpK35-72%	-	GyrA-83I;ParC-80I	KL2	K2	-	Typeable	99.84%	-	O1/O2v1	O2a	-	Typeable
862002	2020-01-14	Georgia	Blood	ST395	yes	no	SAMN54589038	ybt 16; ICEKp12	530-2LV	-	0	iuc 3	88	-	0	-	0	-	-	NDM-5	CTX-M-15	aac(6')-Ib-cr.v2	-	-	qnrS1	-	catA1^	-	sul1	tet(A).v1	-	dfrA1.v1	OXA-1;TEM-1D.v1^	-	SHV-11	35Q	OmpK35-72%	-	GyrA-83I;ParC-80I	KL2	K2	-	Typeable	99.84%	-	O1/O2v1	O2a	-	Typeable
862010	2020-01-14	Georgia	Respiratory	ST395	yes	no	SAMN54589039	ybt 16; ICEKp12	530-2LV	-	0	iuc 3	88	-	0	-	0	-	-	NDM-5	CTX-M-15	aadA*	-	-	qnrS1	-	catA1^	-	sul1	tet(A).v1	-	dfrA1.v1	OXA-1;TEM-1D.v1^	-	SHV-11	35Q	OmpK35-72%	-	GyrA-83I;ParC-80I	KL2	K2	-	Typeable	99.83%	-	O1/O2v1	O2a	-	Typeable
862036	2020-01-14	Georgia	Urine	ST395	yes	no	SAMN54589041	ybt 16; ICEKp12	530-2LV	-	0	iuc 3	88	-	0	-	0	-	-	NDM-5	CTX-M-15	aadA*	-	-	qnrS1	-	catA1^	-	sul1	tet(A).v1	-	dfrA1.v1	OXA-1;TEM-1D.v1^	-	SHV-11	35Q	OmpK35-72%	-	GyrA-83I;ParC-80I	KL2	K2	-	Typeable	99.84%	-	O1/O2v1	O2a	-	Typeable
862086	2020-02-04	Georgia	Respiratory	ST395	yes	no	SAMN54589046	ybt 16; ICEKp12	530-2LV	-	0	iuc 3	88	-	0	-	0	-	-	NDM-5	CTX-M-15	aac(6')-Ib-cr.v2	-	-	qnrS1	-	catA1^	-	sul1	tet(A).v1	-	dfrA1.v1	OXA-1;TEM-1D.v1^	-	SHV-11	35Q	OmpK35-72%	-	GyrA-83I;ParC-80I	KL2	K2	-	Typeable	99.84%	-	O1/O2v1	O2a	-	Typeable
862094	2020-02-04	Georgia	Respiratory	ST395	yes	no	SAMN54589047	ybt 16; ICEKp12	530-2LV	-	0	iuc 3	88	-	0	-	0	-	-	NDM-5	CTX-M-15	aac(6')-Ib-cr.v2	-	-	qnrS1	-	catA1^	-	sul1	tet(A).v1	-	dfrA1.v1	OXA-1;TEM-1D.v1^	-	SHV-11	35Q	OmpK35-72%	-	GyrA-83I;ParC-80I	KL2	K2	-	Typeable	99.84%	-	O1/O2v1	O2a	-	Typeable
862124	2020-02-18	Georgia	Respiratory	ST395	yes	no	SAMN54589050	ybt 16; ICEKp12	530-2LV	-	0	iuc 3	88	-	0	-	0	-	-	NDM-5	CTX-M-15	aac(6')-Ib-cr.v2	-	-	qnrS1	-	catA1^	-	sul1	tet(A).v1	-	dfrA1.v1	OXA-1;TEM-1D.v1^	-	SHV-11	35Q	OmpK35-72%	-	GyrA-83I;ParC-80I	KL2	K2	-	Typeable	99.84%	-	O1/O2v1	O2a	-	Typeable
862166	2020-02-25	Georgia	Respiratory	ST395	yes	no	SAMN54589054	ybt 16; ICEKp12	530-2LV	-	0	iuc 3	88	-	0	-	0	-	-	NDM-5	CTX-M-15	aac(6')-Ib-cr.v2	-	-	qnrS1	-	catA1^	-	sul1	tet(A).v1	-	dfrA1.v1	OXA-1;TEM-1D.v1^	-	SHV-11	35Q	OmpK35-72%	-	GyrA-83I;ParC-80I	KL2	K2	-	Typeable	99.84%	-	O1/O2v1	O2a	-	Typeable
1005935	2021-09-17	Georgia	Blood	ST395	yes	no	SAMN54589499	ybt 16; ICEKp12	530-2LV	-	0	iuc 3	88	-	0	-	0	-	-	NDM-5	CTX-M-15	aac(3)-IIa.v1^;aac(6')-Ib-cr.v2;rmtB	-	-	qnrS1	-	catA1^	-	sul1	tet(A).v1	-	dfrA1.v1;dfrA12	OXA-1;TEM-1D.v1^	-	SHV-11	35Q	OmpK35-72%;OmpK36GD	-	GyrA-83I;ParC-80I	KL2	K2	-	Typeable	99.84%	-	O1/O2v1	O2a	-	Typeable
862182	2020-02-25	Georgia	Respiratory	ST395	yes	no	SAMN54589056	ybt 16; ICEKp12	530-2LV	-	0	iuc 3	88	-	0	-	0	-	-	NDM-5	CTX-M-15	aac(6')-Ib-cr.v2	-	-	qnrS1	-	catA1^	-	sul1	tet(A).v1	-	dfrA1.v1	OXA-1;TEM-1D.v1^	-	SHV-11	35Q	OmpK35-72%	-	GyrA-83I;ParC-80I	KL2	K2	-	Typeable	99.84%	-	O1/O2v1	O2a	-	Typeable
862318	2020-03-17	Georgia	Respiratory	ST395	yes	no	SAMN54589069	ybt 16; ICEKp12	530-2LV	-	0	iuc 3	88	-	0	-	0	-	-	NDM-5	CTX-M-15	aac(6')-Ib-cr.v2	-	-	qnrS1	-	catA1^	-	sul1	tet(A).v1	-	dfrA1.v1	OXA-1;TEM-1D.v1^	-	SHV-11	35Q	OmpK35-72%	-	GyrA-83I;ParC-80I	KL2	K2	-	Typeable	99.84%	-	O1/O2v1	O2a	-	Typeable
862414	2020-03-27	Georgia	Urine	ST395	yes	no	SAMN54589079	ybt 16; ICEKp12	530-2LV	-	0	iuc 3	88	-	0	-	0	-	-	NDM-5	CTX-M-15	aac(6')-Ib-cr.v2	-	-	qnrS1	-	catA1^	-	sul1	tet(A).v1	-	dfrA1.v1	OXA-1;TEM-1D.v1^	-	SHV-11	35Q	OmpK35-72%	-	GyrA-83I;ParC-80I	KL2	K2	-	Typeable	99.84%	-	O1/O2v1	O2a	-	Typeable
862464	2020-04-21	Georgia	Urine	ST395	yes	no	SAMN54589084	ybt 16; ICEKp12	530-2LV	-	0	iuc 3	88	-	0	-	0	-	-	NDM-5	CTX-M-15	aac(6')-Ib-cr.v2	-	-	qnrS1	-	catA1^	-	sul1	tet(A).v1	-	dfrA1.v1	OXA-1;TEM-1D.v1^	-	SHV-11	35Q	OmpK35-72%	-	GyrA-83I;ParC-80I	KL2	K2	-	Typeable	99.84%	-	O1/O2v1	O2a	-	Typeable
862510	2020-05-05	Georgia	Wound	ST395	yes	no	SAMN54589089	ybt 16; ICEKp12	530-2LV	-	0	iuc 3	88	-	0	-	0	-	-	NDM-5	CTX-M-15	aac(6')-Ib-cr.v2	-	-	qnrS1	-	catA1^	-	sul1	tet(A).v1	-	dfrA1.v1	OXA-1;TEM-1D.v1^	-	SHV-11	35Q	OmpK35-72%	-	GyrA-83I;ParC-80I	KL2	K2	-	Typeable	99.84%	-	O1/O2v1	O2a	-	Typeable
862536	2020-05-05	Georgia	Blood	ST395	yes	no	SAMN54589091	ybt 16; ICEKp12	530-2LV	-	0	iuc 3	88	-	0	-	0	-	-	NDM-5	CTX-M-15	aac(6')-Ib-cr.v2	-	-	qnrS1	-	catA1^	-	sul1	tet(A).v1	-	dfrA1.v1	OXA-1;TEM-1D.v1^	-	SHV-11	35Q	OmpK35-72%	-	GyrA-83I;ParC-80I	KL2	K2	-	Typeable	99.84%	-	O1/O2v1	O2a	-	Typeable
862586	2020-05-19	Georgia	Urine	ST395	yes	no	SAMN54589096	ybt 16; ICEKp12	530-2LV	-	0	iuc 3	88	-	0	-	0	-	-	NDM-5	CTX-M-15	aac(3)-IIa.v1^;aac(6')-Ib-cr.v2;aadA2^;rmtB	-	-	qnrS1	-	catA1^	-	sul1	tet(A).v1	-	dfrA1.v1;dfrA12	OXA-1;TEM-1D.v1^	-	SHV-11	35Q	OmpK35-72%	-	GyrA-83I;ParC-80I	KL2	K2	-	Typeable	99.84%	-	O1/O2v1	O2a	-	Typeable
862616	2020-05-19	Georgia	Blood	ST395	yes	no	SAMN54589099	ybt 16; ICEKp12	530-2LV	-	0	iuc 3	88	-	0	-	0	-	-	NDM-5	CTX-M-15	aadA*	-	-	-	-	-	-	sul1	tet(A).v1	-	dfrA1.v1	OXA-1;TEM-1D.v1^	-	SHV-11	35Q	OmpK35-72%	-	GyrA-83I;ParC-80I	KL2	K2	-	Typeable	99.84%	-	O1/O2v1	O2a	-	Typeable
884588	2020-07-28	Georgia	Urine	ST395	yes	no	SAMN54589294	ybt 16; ICEKp12	530-2LV	-	0	iuc 3	88	-	0	-	0	-	-	NDM-5	CTX-M-15	aadA*	-	-	qnrS1	-	catA1^	-	sul1	tet(A).v1	-	dfrA1.v1	OXA-1;TEM-1D.v1^	-	SHV-11	35Q	OmpK35-72%	-	GyrA-83I;ParC-80I	KL2	K2	-	Typeable	99.84%	-	O1/O2v1	O2a	-	Typeable
908499	2021-02-23	Georgia	Respiratory	ST395	yes	no	SAMN54589379	ybt 16; ICEKp12	530-2LV	-	0	iuc 3	88	-	0	-	0	-	-	NDM-5	CTX-M-15	rmtB	-	-	-	-	-	-	sul1	tet(A).v1	-	dfrA1.v1	-	-	SHV-11	35Q	OmpK35-72%	-	GyrA-83I;ParC-80I	KL2	K2	-	Typeable	99.84%	-	O1/O2v1	O2a	-	Typeable
908537	2021-03-09	Georgia	Blood	ST395	yes	no	SAMN54589383	ybt 16; ICEKp12	530-2LV	-	0	iuc 3	88	-	0	-	0	-	-	NDM-5	CTX-M-15	rmtB	-	-	qnrS1	-	catA1^	-	sul1	tet(A).v1	-	dfrA1.v1	-	-	SHV-11	35Q	OmpK35-72%	-	GyrA-83I;ParC-80I	KL2	K2	-	Typeable	99.84%	-	O1/O2v1	O2a	-	Typeable
908545	2021-03-09	Georgia	Blood	ST395	yes	no	SAMN54589384	ybt 16; ICEKp12	530-2LV	-	0	iuc 3	88	-	0	-	0	-	-	NDM-5	CTX-M-15	rmtB	-	-	qnrS1	-	catA1^	-	sul1	tet(A).v1	-	dfrA1.v1	-	-	SHV-11	35Q	OmpK35-72%	-	GyrA-83I;ParC-80I	KL2	K2	-	Typeable	99.84%	-	O1/O2v1	O2a	-	Typeable
884596	2020-07-28	Georgia	Blood	ST395	yes	no	SAMN54589295	ybt 16; ICEKp12	530-2LV	-	0	iuc 3	88	-	0	-	0	-	-	NDM-5	CTX-M-15	aac(6')-Ib-cr.v2	-	-	qnrS1	-	catA1^	-	sul1	tet(A).v1	-	dfrA1.v1	OXA-1;TEM-1D.v1^	-	SHV-11	35Q	OmpK35-72%	-	GyrA-83I;ParC-80I	KL2	K2	-	Typeable	99.84%	-	O1/O2v1	O2a	-	Typeable
908561	2021-03-09	Georgia	Respiratory	ST395	yes	no	SAMN54589386	ybt 16; ICEKp12	530-2LV	-	0	iuc 3	88	-	0	-	0	-	-	NDM-5	CTX-M-15	rmtB	-	-	qnrS1	-	catA1^	-	sul1	tet(A).v1	-	dfrA1.v1	-	-	SHV-11	35Q	OmpK35-72%	-	GyrA-83I;ParC-80I	KL2	K2	-	Typeable	99.84%	-	O1/O2v1	O2a	-	Typeable
884600	2020-09-22	Georgia	Wound	ST395	yes	no	SAMN54589296	ybt 16; ICEKp12	530-2LV	-	0	iuc 3	88	-	0	-	0	-	-	NDM-5	CTX-M-15	aac(6')-Ib-cr.v2	-	-	qnrS1	-	catA1^	-	sul1	tet(A).v1	-	dfrA1.v1	OXA-1;TEM-1D.v1^	-	SHV-11	35Q	OmpK35-72%	-	GyrA-83I;ParC-80I	KL2	K2	-	Typeable	99.84%	-	O1/O2v1	O2a	-	Typeable
908579	2021-03-09	Georgia	Respiratory	ST395	yes	no	SAMN54589387	ybt 16; ICEKp12	530-2LV	-	0	iuc 3	88	-	0	-	0	-	-	NDM-5	CTX-M-15	rmtB	-	-	qnrS1	-	catA1^	-	sul1	tet(A).v1	-	dfrA1.v1	-	-	SHV-11	35Q	OmpK35-72%	-	GyrA-83I;ParC-80I	KL2	K2	-	Typeable	99.84%	-	O1/O2v1	O2a	-	Typeable
908595	2021-03-23	Georgia	Respiratory	ST395	yes	no	SAMN54589389	ybt 16; ICEKp12	530-2LV	-	0	iuc 3	88	-	0	-	0	-	-	NDM-5	CTX-M-15	rmtB	-	-	qnrS1	-	catA1^	-	sul1	tet(A).v1	-	dfrA1.v1	-	-	SHV-11	35Q	OmpK35-72%	-	GyrA-83I;ParC-80I	KL2	K2	!	Typeable	99.87%	-	O1/O2v1	O2a	-	Typeable
908617	2021-03-23	Georgia	Respiratory	ST395	yes	no	SAMN54589391	ybt 16; ICEKp12	530-2LV	-	0	iuc 3	88	-	0	-	0	-	-	NDM-5	CTX-M-15	rmtB	-	-	qnrS1	-	catA1^	-	sul1	tet(A).v1	-	dfrA1.v1	-	-	SHV-11	35Q	OmpK35-72%	-	GyrA-83I;ParC-80I	KL2	K2	-	Typeable	99.84%	-	O1/O2v1	O2a	-	Typeable
884626	2020-08-11	Georgia	Blood	ST395	yes	no	SAMN54589298	ybt 16; ICEKp12	530-2LV	-	0	iuc 3	88	-	0	-	0	-	-	NDM-5	CTX-M-15	aac(6')-Ib-cr.v2	-	-	qnrS1	-	catA1^	-	sul1	tet(A).v1	-	dfrA1.v1	OXA-1;TEM-1D.v1^	-	SHV-11	35Q	OmpK35-72%	-	GyrA-83I;ParC-80I	KL2	K2	-	Typeable	99.84%	-	O1/O2v1	O2a	-	Typeable
884634	2020-06-02	Georgia	Blood	ST395	yes	no	SAMN54589299	ybt 16; ICEKp12	530-2LV	-	0	iuc 3	88	-	0	-	0	-	-	NDM-5	CTX-M-15	aac(6')-Ib-cr.v2	-	-	qnrS1	-	catA1^	-	sul1	tet(A).v1	-	dfrA1.v1	OXA-1;TEM-1D.v1^	-	SHV-11	35Q	OmpK35-72%	-	GyrA-83I;ParC-80I	KL2	K2	-	Typeable	99.84%	-	O1/O2v1	O2a	-	Typeable
884642	2020-06-02	Georgia	Blood	ST395	yes	no	SAMN54589300	ybt 16; ICEKp12	530-2LV	-	0	iuc 3	88	-	0	-	0	-	-	NDM-5	CTX-M-15	aac(6')-Ib-cr.v2	-	-	qnrS1	-	catA1^	-	sul1	tet(A).v1	-	dfrA1.v1	OXA-1;TEM-1D.v1^	-	SHV-11	35Q	OmpK35-72%	-	GyrA-83I;ParC-80I	KL2	K2	-	Typeable	99.84%	-	O1/O2v1	O2a	-	Typeable
908633	2021-04-06	Georgia	Wound	ST395	yes	no	SAMN54589392	ybt 16; ICEKp12	530-2LV	-	0	iuc 3	88	-	0	-	0	-	-	NDM-5	CTX-M-15	rmtB	-	-	qnrS1	-	catA1^	-	sul1	tet(A).v1	-	dfrA1.v1	-	-	SHV-11	35Q	OmpK35-72%	-	GyrA-83I;ParC-80I	KL2	K2	-	Typeable	99.84%	-	O1/O2v1	O2a	-	Typeable
884714	2020-06-02	Georgia	Blood	ST395	yes	no	SAMN54589306	ybt 16; ICEKp12	530-2LV	-	0	iuc 3	88	-	0	-	0	-	-	NDM-5	CTX-M-15	aac(6')-Ib-cr.v2	-	-	qnrS1	-	catA1^	-	sul1	tet(A).v1	-	dfrA1.v1	OXA-1;TEM-1D.v1^	-	SHV-11	35Q	OmpK35-72%	-	GyrA-83I;ParC-80I	KL2	K2	-	Typeable	99.84%	-	O1/O2v1	O2a	-	Typeable
884748	2020-06-16	Georgia	Blood	ST395	yes	no	SAMN54589309	ybt 16; ICEKp12	530-2LV	-	0	iuc 3	88	-	0	-	0	-	-	NDM-5	CTX-M-15	aac(6')-Ib-cr.v2	-	-	qnrS1	-	catA1^	-	sul1	tet(A).v1	-	dfrA1.v1	OXA-1;TEM-1D.v1^	-	SHV-11	35Q	OmpK35-72%	-	GyrA-83I;ParC-80I	KL2	K2	-	Typeable	99.84%	-	O1/O2v1	O2a	-	Typeable
908133	2020-11-17	Georgia	Respiratory	ST395	yes	no	SAMN54589344	ybt 16; ICEKp12	530-2LV	-	0	iuc 3	88	-	0	-	0	-	-	NDM-5	CTX-M-15	aadA*	-	-	qnrS1	-	catA1^	-	sul1	tet(A).v1	-	dfrA1.v1	OXA-1;TEM-1D.v1^	-	SHV-11	35Q	OmpK35-72%	-	GyrA-83I;ParC-80I	KL2	K2	-	Typeable	99.84%	-	O1/O2v1	O2a	-	Typeable
862300	2020-03-17	Georgia	Respiratory	ST395	yes	no	SAMN54589068	ybt 16; ICEKp12	530-2LV	-	0	iuc 3	88	-	0	-	0	-	-	NDM-5	CTX-M-15	aac(6')-Ib-cr.v2	-	-	qnrS1	-	catA1^	-	sul1	tet(A).v1	-	dfrA1.v1	OXA-1	-	SHV-11	35Q	OmpK35-72%	-	GyrA-83I;ParC-80I	KL2	K2	-	Typeable	99.84%	-	O1/O2v1	O2a	-	Typeable
862578	2020-05-19	Georgia	Respiratory	ST395	yes	no	SAMN54589095	ybt 16; ICEKp12	530-2LV	-	0	iuc 3	88	-	0	-	0	-	-	NDM-5	CTX-M-15	aac(6')-Ib-cr.v2	-	-	-	-	catA1^	-	sul1	tet(A).v1	-	dfrA1.v1	OXA-1	-	SHV-11	35Q	OmpK35-72%	-	GyrA-83I;ParC-80I	KL2	K2	-	Typeable	99.84%	-	O1/O2v1	O2a	-	Typeable
908141	2020-12-01	Georgia	Respiratory	ST395	yes	no	SAMN54589345	ybt 16; ICEKp12	530-2LV	-	0	iuc 3	88	-	0	-	0	-	-	NDM-5	CTX-M-15	rmtB	-	-	qnrS1	-	catA1^	-	sul1	tet(A).v1	-	dfrA1.v1	-	-	SHV-11	35Q	OmpK35-72%	-	GyrA-83I;ParC-80I	KL2	K2	-	Typeable	99.84%	-	O1/O2v1	O2a	-	Typeable
861898	2020-01-08	Georgia	Respiratory	ST395	yes	no	SAMN54589027	-	0	-	0	iuc 3	88	-	0	-	0	-	-	NDM-5	-	aac(6')-Ib-cr.v2*;aadA*	-	-	-	-	-	-	sul1	-	-	-	TEM-1D.v1^	-	SHV-11	35Q	OmpK35-72%	-	GyrA-83I;ParC-80I	KL2	K2	-	Typeable	99.84%	-	O1/O2v1	O2a	!	Typeable
908641	2021-04-06	Georgia	Respiratory	ST395	yes	no	SAMN54589393	ybt 16; ICEKp12	530-2LV	-	0	iuc 3	88	-	0	-	0	-	-	NDM-5	CTX-M-15	rmtB	-	-	qnrS1	-	catA1^	-	sul1	tet(A).v1	-	dfrA1.v1	-	-	SHV-11	35Q	OmpK35-72%	-	GyrA-83I;ParC-80I	KL2	K2	-	Typeable	99.84%	-	O1/O2v1	O2a	-	Typeable
946675	2021-06-29	Georgia	Urine	ST395	yes	no	SAMN54589407	ybt 16; ICEKp12	530-2LV	-	0	iuc 3	88	-	0	-	0	-	-	NDM-5	CTX-M-15	rmtB	-	-	qnrS1	-	catA1^	-	sul1	tet(A).v1	-	dfrA1.v1	-	-	SHV-11	35Q	OmpK35-72%	-	GyrA-83I;ParC-80I	KL2	K2	-	Typeable	99.84%	-	O1/O2v1	O2a	-	Typeable
1005397	2021-07-27	Georgia	Urine	ST395	yes	no	SAMN54589482	ybt 16; ICEKp12	530-2LV	-	0	iuc 3	88	-	0	-	0	-	-	NDM-5	CTX-M-15	rmtB	-	-	qnrS1	-	catA1^	-	sul1	tet(A).v1	-	dfrA1.v1	-	-	SHV-11	35Q	OmpK35-72%	-	GyrA-83I;ParC-80I	KL2	K2	?3	Typeable	99.85%	-	O1/O2v1	O2a	-	Typeable
884618	2020-08-11	Georgia	Respiratory	ST395	yes	no	SAMN54589297	ybt 16; ICEKp12	530-2LV	-	0	iuc 3	88	-	0	-	0	-	-	NDM-5	-	aac(6')-Ib-cr.v2*;aadA*	-	-	-	-	-	-	sul1	-	-	-	TEM-1D.v1^	-	SHV-11	35Q	OmpK35-72%	-	GyrA-83I;ParC-80I	KL2	K2	-	Typeable	99.84%	-	O1/O2v1	O2a	-	Typeable
862108	2020-02-11	Georgia	Blood	ST395	yes	no	SAMN54589048	ybt 16; ICEKp12	530-2LV	-	0	iuc 3	88	-	0	-	0	-	-	NDM-5	-	-	-	-	-	-	-	-	sul1	-	-	-	-	-	SHV-11	35Q	OmpK35-72%	-	GyrA-83I;ParC-80I	KL2	K2	-	Typeable	99.84%	-	O1/O2v1	O2a	-	Typeable
1005565	2021-08-10	Georgia	Urine	ST395	yes	no	SAMN54589486	ybt 16; ICEKp12	530-2LV	-	0	iuc 3	88	-	0	-	0	-	-	NDM-5	CTX-M-15	rmtB	-	-	qnrS1	-	catA1^	-	sul1	tet(A).v1	-	dfrA1.v1	-	-	SHV-11	35Q	OmpK35-72%	-	GyrA-83I;ParC-80I	KL2	K2	-	Typeable	99.84%	-	O1/O2v1	O2a	-	Typeable
1005581	2021-08-10	Georgia	Respiratory	ST395	yes	no	SAMN54589488	ybt 16; ICEKp12	530-2LV	-	0	iuc 3	88	-	0	-	0	-	-	NDM-5	CTX-M-15	rmtB	-	-	qnrS1	-	catA1^	-	sul1	tet(A).v1	-	dfrA1.v1	-	-	SHV-11	35Q	OmpK35-72%	-	GyrA-83I;ParC-80I	KL2	K2	-	Typeable	99.84%	-	O1/O2v1	O2a	-	Typeable
862116	2020-02-11	Georgia	Urine	ST395	yes	no	SAMN54589049	ybt 16; ICEKp12	530-2LV	-	0	iuc 3	88	-	0	-	0	-	-	NDM-5	-	-	-	-	-	-	-	-	sul1	-	-	-	-	-	SHV-11	35Q	OmpK35-72%	-	GyrA-83I;ParC-80I	KL2	K2	-	Typeable	99.84%	-	O1/O2v1	O2a	-	Typeable
862174	2020-02-25	Georgia	Respiratory	ST395	yes	no	SAMN54589055	ybt 16; ICEKp12	530-2LV	-	0	iuc 3	88	-	0	-	0	-	-	NDM-5	-	-	-	-	-	-	-	-	sul1	-	-	-	-	-	SHV-11	35Q	OmpK35-72%	-	GyrA-83I;ParC-80I	KL2	K2	-	Typeable	99.84%	-	O1/O2v1	O2a	-	Typeable
862288	2020-03-17	Georgia	Respiratory	ST395	yes	no	SAMN54589066	ybt 16; ICEKp12	530-2LV	-	0	iuc 3	88	-	0	-	0	-	-	NDM-5	-	-	-	-	-	-	-	-	sul1	-	-	-	-	-	SHV-11	35Q	OmpK35-72%	-	GyrA-83I;ParC-80I	KL2	K2	-	Typeable	99.84%	-	O1/O2v1	O2a	-	Typeable
1005653	2021-08-24	Georgia	Urine	ST395	yes	no	SAMN54589492	ybt 16; ICEKp12	530-2LV	-	0	iuc 3	88	-	0	-	0	-	-	NDM-5	CTX-M-15	rmtB	-	-	qnrS1	-	catA1^	-	sul1	tet(A).v1	-	dfrA1.v1	-	-	SHV-11	35Q	OmpK35-72%;OmpK36-53%	-	GyrA-83I;ParC-80I	KL2	K2	-	Typeable	99.84%	-	O1/O2v1	O2a	-	Typeable
862560	2020-05-05	Georgia	Respiratory	ST395	yes	no	SAMN54589094	ybt 16; ICEKp12	530-2LV	-	0	iuc 3	88	-	0	-	0	-	-	NDM-5	-	-	-	-	-	-	-	-	sul1	-	-	-	-	-	SHV-11	35Q	OmpK35-72%	-	GyrA-83I;ParC-80I	KL2	K2	-	Typeable	99.84%	-	O1/O2v1	O2a	-	Typeable
862594	2020-05-19	Georgia	Wound	ST395	yes	no	SAMN54589097	ybt 16; ICEKp12	530-2LV	-	0	iuc 3	88	-	0	-	0	-	-	NDM-5	-	-	-	-	-	-	-	-	sul1	-	-	-	-	-	SHV-11	35Q	OmpK35-72%	-	GyrA-83I;ParC-80I	KL2	K2	-	Typeable	99.84%	-	O1/O2v1	O2a	-	Typeable
1005661	2021-08-24	Georgia	Urine	ST395	yes	no	SAMN54589493	ybt 16; ICEKp12	530-2LV	-	0	iuc 3	88	-	0	-	0	-	-	NDM-5	CTX-M-15	rmtB	-	-	qnrS1	-	catA1^	-	sul1	tet(A).v1	-	dfrA1.v1	-	-	SHV-11	35Q	OmpK35-72%	-	GyrA-83I;ParC-80I	KL2	K2	-	Typeable	99.84%	-	O1/O2v1	O2a	-	Typeable
908377	2021-01-25	Georgia	Blood	ST395	yes	no	SAMN54589367	ybt 16; ICEKp12	530-2LV	-	0	iuc 3	88	-	0	-	0	-	-	NDM-5	-	-	-	-	qnrS1	-	-	-	sul1	tet(A).v1	-	dfrA1.v1	TEM-1D.v1^	-	SHV-11	35Q	OmpK35-72%	-	GyrA-83I;ParC-80I	KL2	K2	-	Typeable	99.84%	-	O1/O2v1	O2a	-	Typeable
908415	2021-02-09	Georgia	Urine	ST395	yes	no	SAMN54589371	ybt 16; ICEKp12	530-2LV	-	0	iuc 3	88	-	0	-	0	-	-	NDM-5	-	-	-	-	-	-	-	-	sul1	-	-	-	-	-	SHV-11	35Q	OmpK35-72%	-	GyrA-83I;ParC-80I	KL2	K2	-	Typeable	99.84%	-	O1/O2v1	O2a	-	Typeable
908481	2021-02-23	Georgia	Urine	ST395	yes	no	SAMN54589378	ybt 16; ICEKp12	530-2LV	-	0	iuc 3	88	-	0	-	0	-	-	NDM-5	-	-	-	-	-	-	-	-	sul1	-	-	-	-	-	SHV-11	35Q	OmpK35-72%	-	GyrA-83I;ParC-80I	KL2	K2	-	Typeable	99.84%	-	O1/O2v1	O2a	-	Typeable
1005645	2021-08-24	Georgia	Urine	ST395	yes	no	SAMN54589491	ybt 16; ICEKp12	530-2LV	-	0	iuc 3	88	-	0	-	0	-	-	NDM-5	-	-	-	-	-	-	-	-	sul1	-	-	-	-	-	SHV-11	35Q	OmpK35-72%	-	GyrA-83I;ParC-80I	KL2	K2	-	Typeable	99.77%	-	O1/O2v1	O2a	-	Typeable
861792	2019-12-10	Georgia	Respiratory	ST395	yes	no	SAMN54589017	ybt 16; ICEKp12	530-2LV	-	0	iuc 3	88	-	0	-	0	-	-	NDM-5	CTX-M-15	aadA*	-	-	qnrS1	-	catA1^	-	sul1	tet(A).v1	-	dfrA1.v1	OXA-1;TEM-1D.v1^	-	SHV-11	35Q	OmpK35-72%	-	GyrA-83I;ParC-80I	KL2	K2	-	Typeable	99.84%	-	O1/O2v1	O2a	-	Typeable
861822	2019-12-10	Georgia	Blood	ST395	yes	no	SAMN54589020	ybt 16; ICEKp12	530-2LV	-	0	iuc 3	88	-	0	-	0	-	-	NDM-5	CTX-M-15	aadA*	-	-	qnrS1	-	-	-	sul1	tet(A).v1	-	dfrA1.v1	OXA-1;TEM-1D.v1^	-	SHV-11	35Q	OmpK35-72%	-	GyrA-83I;ParC-80I	KL2	K2	-	Typeable	99.84%	-	O1/O2v1	O2a	-	Typeable
861830	2019-12-18	Georgia	Respiratory	ST395	yes	no	SAMN54589021	ybt 16; ICEKp12	530-2LV	-	0	iuc 3	88	-	0	-	0	-	-	NDM-5	CTX-M-15	aac(6')-Ib-cr.v2*;aadA*	-	-	qnrS1	-	catA1^	-	sul1	tet(A).v1	-	dfrA1.v1	OXA-1;TEM-1D.v1^	-	SHV-11	35Q	OmpK35-72%	-	GyrA-83I;ParC-80I	KL2	K2	-	Typeable	99.84%	-	O1/O2v1	O2a	-	Typeable
861856	2019-12-18	Georgia	Blood	ST395	yes	no	SAMN54589023	ybt 16; ICEKp12	530-2LV	-	0	iuc 3	88	-	0	-	0	-	-	NDM-5	CTX-M-15	aac(6')-Ib-cr.v2	-	-	qnrS1	-	catA1^	-	sul1	tet(A).v1	-	dfrA1.v1	OXA-1;TEM-1D.v1^	-	SHV-11	35Q	OmpK35-72%	-	GyrA-83I;ParC-80I	KL2	K2	-	Typeable	99.84%	-	O1/O2v1	O2a	-	Typeable
804444	2019-03-01	Georgia	Blood	ST395	yes	no	SAMN54588959	ybt 16; ICEKp12	530-2LV	-	0	iuc 3	88	-	0	-	0	-	-	-	CTX-M-15	aac(3)-IIa.v1^;aadA*	-	-	-	-	catA1^	-	sul1	tet(A).v1	-	dfrA1.v1	OXA-1;TEM-1D.v1^	-	SHV-11	35Q	OmpK35-72%	-	GyrA-83I;ParC-80I	KL2	K2	-	Typeable	99.84%	-	O1/O2v1	O2a	-	Typeable
804494	2019-07-25	Georgia	Urine	ST395	yes	no	SAMN54588963	ybt 16; ICEKp12	530-2LV	-	0	iuc 3	88	-	0	-	0	-	-	-	CTX-M-15	aac(3)-IIa.v1^;aadA*	-	-	qnrS1	-	catA1^	-	sul1	tet(A).v1	-	dfrA1.v1	OXA-1;TEM-1D.v1^	-	SHV-11	35Q	OmpK35-72%	-	GyrA-83I;ParC-80I	KL2	K2	-	Typeable	99.84%	-	O1/O2v1	O2a	-	Typeable
804486	2019-07-05	Georgia	Urine	ST395	yes	no	SAMN54588962	ybt 16; ICEKp12	530-2LV	-	0	iuc 3	88	-	0	-	0	-	-	-	CTX-M-15	aac(6')-Ib-cr.v2	-	-	-	-	-	-	sul1	tet(A).v1	-	dfrA1.v1	OXA-1	-	SHV-11	35Q	OmpK35-72%	-	GyrA-83I;ParC-80I	KL2	K2	-	Typeable	99.84%	-	O1/O2v1	O2a	-	Typeable
803878	2018-01-25	Georgia	Blood	ST395	yes	no	SAMN54588902	ybt 16; ICEKp12	530-2LV	-	0	iuc 3	88	-	0	-	0	-	-	-	CTX-M-15	aadA*	-	-	qnrS1	-	catA1^	-	sul1	tet(A).v1	-	dfrA1.v1	OXA-1;TEM-1D.v1^	-	SHV-11	35Q	OmpK35-72%	-	GyrA-83I;ParC-80I	KL2	K2	-	Typeable	99.83%	-	O1/O2v1	O2a	-	Typeable
803886	2018-01-25	Georgia	Blood	ST395	yes	no	SAMN54588903	ybt 16; ICEKp12	530-2LV	-	0	iuc 3	88	-	0	-	0	-	-	-	CTX-M-15	aadA*	-	-	qnrS1	-	catA1^	-	sul1	tet(A).v1	-	dfrA1.v1	OXA-1;TEM-1D.v1^	-	SHV-11	35Q	OmpK35-72%	-	GyrA-83I;ParC-80I	KL2	K2	-	Typeable	99.83%	-	O1/O2v1	O2a	-	Typeable
804402	2019-02-07	Georgia	Urine	ST395	yes	no	SAMN54588955	ybt 16; ICEKp12	530-2LV	-	0	iuc 1	95	-	0	-	0	-	-	OXA-48	CTX-M-15	aadA*;ant(2'')-Ia	-	-	qnrS1	-	catA1^	-	sul1	-	-	-	TEM-1D.v1^	-	SHV-1^	-	OmpK35-72%;OmpK36_c25t	-	GyrA-83I;ParC-80I	KL2	K2	?3	Typeable	99.84%	-	O1/O2v1	O1ab	?2!	Typeable
803894	2018-01-25	Georgia	Blood	ST395	yes	no	SAMN54588904	ybt 16; ICEKp12	530-2LV	-	0	iuc 3	88	-	0	-	0	-	-	-	CTX-M-15	aadA*	-	-	qnrS1	-	catA1^	-	sul1	tet(A).v1	-	dfrA1.v1	OXA-1;TEM-1D.v1^	-	SHV-11	35Q	OmpK35-72%	-	GyrA-83I;ParC-80I	KL2	K2	-	Typeable	99.84%	-	O1/O2v1	O2a	-	Typeable
804460	2019-03-22	Georgia	Urine	ST395	yes	no	SAMN54588960	ybt 16; ICEKp12	530-2LV	-	0	iuc 1	95	-	0	-	0	-	-	OXA-48	CTX-M-15	aadA*;aadA5;ant(2'')-Ia;armA	-	-	qnrS1	mphE.v2;msrE*	catA1^	-	sul1	-	-	dfrA17	TEM-1D.v1^	-	SHV-1^	-	OmpK35-72%;OmpK36_c25t	-	GyrA-83I;ParC-80I	KL2	K2	?2	Typeable	99.83%	-	O1/O2v1	O1ab	?2	Typeable
803908	2018-01-25	Georgia	Blood	ST395	yes	no	SAMN54588905	ybt 16; ICEKp12	530-2LV	-	0	iuc 3	88	-	0	-	0	-	-	-	CTX-M-15	aadA*	-	-	qnrS1	-	catA1^	-	sul1	tet(A).v1	-	dfrA1.v1	OXA-1;TEM-1D.v1^	-	SHV-11	35Q	OmpK35-72%	-	GyrA-83I;ParC-80I	KL2	K2	-	Typeable	99.84%	-	O1/O2v1	O2a	-	Typeable
803966	2018-02-22	Georgia	Urine	ST395	yes	no	SAMN54588911	ybt 16; ICEKp12	530-2LV	-	0	iuc 3	88	-	0	-	0	-	-	-	CTX-M-15	aadA*	-	-	qnrS1	-	catA1^	-	sul1	tet(A).v1	-	dfrA1.v1	OXA-1;TEM-1D.v1^	-	SHV-11	35Q	OmpK35-72%	-	GyrA-83I;ParC-80I	KL2	K2	-	Typeable	99.84%	-	O1/O2v1	O2a	-	Typeable
804024	2018-05-04	Georgia	Blood	ST395	yes	no	SAMN54588917	ybt 16; ICEKp12	530-2LV	-	0	iuc 3	88	-	0	-	0	-	-	-	CTX-M-15	aadA*	-	-	qnrS1	-	catA1^	-	sul1	tet(A).v1	-	dfrA1.v1	OXA-1;TEM-1D.v1^	-	SHV-11	35Q	OmpK35-72%	-	GyrA-83I;ParC-80I	KL2	K2	-	Typeable	99.84%	-	O1/O2v1	O2a	-	Typeable
804040	2018-05-11	Georgia	Blood	ST395	yes	no	SAMN54588919	ybt 16; ICEKp12	530-2LV	-	0	iuc 3	88	-	0	-	0	-	-	-	CTX-M-15	aadA*	-	-	qnrS1	-	catA1^	-	sul1	tet(A).v1	-	dfrA1.v1	OXA-1;TEM-1D.v1^	-	SHV-11	35Q	OmpK35-72%	-	GyrA-83I;ParC-80I	KL2	K2	-	Typeable	99.84%	-	O1/O2v1	O2a	-	Typeable
804090	2018-06-22	Georgia	Urine	ST395	yes	no	SAMN54588924	ybt 16; ICEKp12	530-2LV	-	0	iuc 3	88	-	0	-	0	-	-	-	CTX-M-15	aadA*	-	-	qnrS1	-	catA1^	-	sul1	tet(A).v1	-	dfrA1.v1	OXA-1;TEM-1D.v1^	-	SHV-11	35Q	OmpK35-72%	-	GyrA-83I;ParC-80I	KL2	K2	-	Typeable	99.84%	-	O1/O2v1	O2a	-	Typeable
804104	2018-07-12	Georgia	Blood	ST395	yes	no	SAMN54588925	ybt 16; ICEKp12	530-2LV	-	0	iuc 3	88	-	0	-	0	-	-	-	CTX-M-15	aac(3)-IIa.v1^;aac(6')-Ib-cr.v2	-	-	qnrS1	-	catA1^	-	sul1	tet(A).v1	-	dfrA1.v1	OXA-1;TEM-1D.v1^	-	SHV-11	35Q	OmpK35-72%	-	GyrA-83I;ParC-80I	KL2	K2	-	Typeable	99.84%	-	O1/O2v1	O2a	-	Typeable
804314	2018-11-29	Georgia	Blood	ST395	yes	no	SAMN54588946	ybt 16; ICEKp12	530-2LV	-	0	iuc 3	88	-	0	-	0	-	-	-	CTX-M-15	aac(3)-IIa.v1^;aadA*	-	-	qnrS1	-	catA1^	-	sul1	tet(A).v1	-	dfrA1.v1	OXA-1;TEM-1D.v1^	-	SHV-11	35Q	OmpK35-72%	-	GyrA-83I;ParC-80I	KL2	K2	-	Typeable	99.84%	-	O1/O2v1	O2a	-	Typeable
1004641	2018-02-18	Georgia	Respiratory	ST395	yes	no	SAMN54589464	ybt 16; ICEKp12	530-2LV	-	0	iuc 3	88	-	0	-	0	-	-	-	CTX-M-15	aac(6')-Ib-cr.v2*;aadA*	-	-	qnrS1	-	catA1^	-	sul1	tet(A).v1	-	dfrA1.v1	OXA-1;TEM-1D.v1^	-	SHV-11	35Q	OmpK35-72%	-	GyrA-83I;ParC-80I	KL2	K2	-	Typeable	99.84%	-	O1/O2v1	O2a	-	Typeable
1004659	2018-04-20	Georgia	Respiratory	ST395	yes	no	SAMN54589465	ybt 16; ICEKp12	530-2LV	-	0	iuc 3	88	-	0	-	0	-	-	-	CTX-M-15	aadA*	-	-	qnrS1	-	catA1^	-	sul1	tet(A).v1	-	dfrA1.v1	OXA-1;TEM-1D.v1^	-	SHV-11	35Q	OmpK35-72%	-	GyrA-83I;ParC-80I	KL2	K2	-	Typeable	99.84%	-	O1/O2v1	O2a	-	Typeable
1004667	2018-04-25	Georgia	Respiratory	ST395	yes	no	SAMN54589466	ybt 16; ICEKp12	530-2LV	-	0	iuc 3	88	-	0	-	0	-	-	-	CTX-M-15	aadA*	-	-	qnrS1	-	catA1^	-	sul1	tet(A).v1	-	dfrA1.v1	OXA-1;TEM-1D.v1^	-	SHV-11	35Q	OmpK35-72%	-	GyrA-83I;ParC-80I	KL2	K2	-	Typeable	99.84%	-	O1/O2v1	O2a	-	Typeable
803940	2018-02-22	Georgia	Blood	ST395	yes	no	SAMN54588909	ybt 16; ICEKp12	530-2LV	-	0	iuc 1	95	-	0	-	0	-	-	-	CTX-M-15	aadA*;ant(2'')-Ia	-	-	qnrS1	-	catA1^	-	sul1	-	-	-	TEM-1D.v1^	-	SHV-1^	-	OmpK35-72%;OmpK36_c25t	-	GyrA-83I;ParC-80I	KL2	K2	?2	Typeable	99.84%	-	O1/O2v1	O1ab	?2!	Typeable
804162	2018-09-21	Georgia	Blood	ST395	yes	no	SAMN54588931	ybt 14; ICEKp12	586-2LV	-	0	iuc 1	95	-	0	-	0	-	-	OXA-48	CTX-M-15	aac(6')-Ib-cr.v2;aadA*;ant(2'')-Ia	-	-	qnrS1	-	catA1^	-	sul1	tet(A).v1	-	dfrA1.v1	OXA-1;TEM-1D.v1^	-	SHV-11	35Q	OmpK35-72%;OmpK36GD	-	GyrA-83I;ParC-80I	KL108	unknown (KL108)	?2	Typeable	99.97%	-	O1/O2v2	O1ab	-	Typeable
804082	2018-06-22	Georgia	Blood	ST395	yes	no	SAMN54588923	ybt 16; ICEKp12	530-3LV	-	0	iuc 1	95	-	0	-	0	-	-	OXA-48	CTX-M-15	aadA*;aadA5;ant(2'')-Ia;armA	-	-	qnrS1	mphE.v2;msrE*	catA1^	-	sul1	-	-	dfrA17	TEM-1D.v1^	-	SHV-1^	-	OmpK35-72%;OmpK36_c25t	-	GyrA-83I;ParC-80I	KL2	K2	?2	Typeable	99.84%	-	O1/O2v1	O1ab	?2!	Typeable
804170	2018-10-09	Georgia	Blood	ST395	yes	no	SAMN54588932	ybt 16; ICEKp12	530-2LV	-	0	iuc 1	95	-	0	-	0	-	-	OXA-48	CTX-M-15	aadA*;aadA5;ant(2'')-Ia;armA	-	-	qnrS1	mphE.v2;msrE*	catA1^	-	sul1	-	-	dfrA17	TEM-1D.v1^	-	SHV-1^	-	OmpK35-72%;OmpK36_c25t	-	GyrA-83I;ParC-80I	KL2	K2	?2	Typeable	99.83%	-	O1/O2v1	O1ab	?2!	Typeable
804284	2018-10-19	Georgia	Blood	ST395	yes	no	SAMN54588943	ybt 16; ICEKp12	530-2LV	-	0	iuc 1	95	-	0	-	0	-	-	OXA-48	CTX-M-15	aadA*;aadA5;ant(2'')-Ia;armA	-	-	qnrS1	mphE.v2;msrE*	catA1^	-	sul1	-	-	dfrA17	TEM-1D.v1^	-	SHV-1^	-	OmpK35-72%;OmpK36_c25t	-	GyrA-83I;ParC-80I	KL2	K2	?2	Typeable	99.83%	-	O1/O2v1	O1ab	?2!	Typeable
804306	2018-10-26	Georgia	Urine	ST395	yes	no	SAMN54588945	ybt 16; ICEKp12	530-2LV	-	0	iuc 1	95	-	0	-	0	-	-	OXA-48	CTX-M-15	aadA*;aadA5;ant(2'')-Ia;armA	-	-	qnrS1	mphE.v2;msrE*	catA1^	-	sul1	-	-	dfrA17	TEM-1D.v1^	-	SHV-1^	-	OmpK35-72%;OmpK36_c25t	MgrB-15%	GyrA-83I;ParC-80I	KL2	K2	?2	Typeable	99.83%	-	O1/O2v1	O1ab	?2!	Typeable
862368	2020-03-27	Georgia	Respiratory	ST395	yes	no	SAMN54589074	ybt 16; ICEKp12	530-2LV	-	0	iuc 3	88	-	0	-	0	-	-	-	-	-	-	-	-	-	-	-	-	-	-	-	-	-	SHV-11	35Q	OmpK35-72%	-	GyrA-83I;ParC-80I	KL2	K2	-	Typeable	99.84%	-	O1/O2v1	O2a	-	Typeable
884722	2020-06-02	Georgia	Respiratory	ST395	yes	no	SAMN54589307	ybt 16; ICEKp12	530-2LV	-	0	iuc 3	88	-	0	-	0	-	-	-	-	-	-	-	-	-	-	-	-	-	-	-	-	-	SHV-11	35Q	OmpK35-72%	-	GyrA-83I;ParC-80I	KL2	K2	-	Typeable	99.84%	-	O1/O2v1	O2a	-	Typeable
803730	2017-10-24	Georgia	Blood	ST395	yes	no	SAMN54588888	ybt 16; ICEKp12	530-2LV	-	0	iuc 3	88	-	0	-	0	-	-	-	-	aac(6')-Ib-cr.v2*;aadA*	-	-	-	-	-	-	-	-	-	-	TEM-1D.v1^	-	SHV-11	35Q	OmpK35-72%	-	GyrA-83I;ParC-80I	KL2	K2	-	Typeable	99.84%	-	O1/O2v1	O2a	-	Typeable
803748	2017-10-24	Georgia	Blood	ST395	yes	no	SAMN54588889	ybt 16; ICEKp12	530-2LV	-	0	iuc 3	88	-	0	-	0	-	-	-	-	aac(6')-Ib-cr.v2*;aadA*	-	-	-	-	-	-	-	-	-	-	TEM-1D.v1^	-	SHV-11	35Q	OmpK35-72%	-	GyrA-83I;ParC-80I	KL2	K2	-	Typeable	99.84%	-	O1/O2v1	O2a	-	Typeable
803844	2018-01-25	Georgia	Blood	ST395	yes	no	SAMN54588899	ybt 16; ICEKp12	530-2LV	-	0	iuc 3	88	-	0	-	0	-	-	-	-	aac(6')-Ib-cr.v2*;aadA*	-	-	-	-	-	-	-	-	-	-	TEM-1D.v1^	-	SHV-11	35Q	OmpK35-72%	-	GyrA-83I;ParC-80I	KL2	K2	-	Typeable	99.84%	-	O1/O2v1	O2a	-	Typeable
803852	2018-01-25	Georgia	Blood	ST395	yes	no	SAMN54588900	ybt 16; ICEKp12	530-2LV	-	0	iuc 3	88	-	0	-	0	-	-	-	-	aac(6')-Ib-cr.v2*;aadA*	-	-	-	-	-	-	-	-	-	-	TEM-1D.v1^	-	SHV-11	35Q	OmpK35-72%	-	GyrA-83I;ParC-80I	KL2	K2	-	Typeable	99.84%	-	O1/O2v1	O2a	-	Typeable
862376	2020-03-27	Georgia	Wound	ST147	no	no	SAMN54589075	-	0	-	0	-	0	-	0	-	0	-	-	NDM-1	CTX-M-15	aadA*;aph(3')-VI;armA	-	-	qnrS1	mphE.v2;msrE	-	-	sul1;sul2	-	-	dfrA5	OXA-9.v1	-	SHV-11^	35Q	-	-	GyrA-83I;ParC-80I	KL20	K20	-	Typeable	99.97%	-	O1/O2v1	O2a	-	Typeable
884764	2020-06-30	Georgia	Respiratory	ST147	no	no	SAMN54589311	-	0	-	0	-	0	-	0	-	0	-	-	NDM-1	CTX-M-15	aadA*;aph(3')-VI;armA	-	-	qnrS1	mphE.v2;msrE	-	-	sul1;sul2	-	-	dfrA5	OXA-9.v1	-	SHV-11^	35Q	-	-	GyrA-83I;ParC-80I	KL20	K20	-	Typeable	99.97%	-	O1/O2v1	O2a	-	Typeable
884966	2020-10-06	Georgia	Wound	ST147	no	no	SAMN54589331	-	0	-	0	-	0	-	0	-	0	-	-	NDM-1	CTX-M-15	aadA*;aph(3')-VI;armA	-	-	qnrS1	mphE.v2;msrE	-	-	sul1;sul2	-	-	dfrA5	OXA-9.v1	-	SHV-11^	35Q	-	-	GyrA-83I;ParC-80I	KL20	K20	-	Typeable	99.97%	-	O1/O2v1	O2a	-	Typeable
862158	2020-02-25	Georgia	Urine	ST15	no	no	SAMN54589053	ybt 16; ICEKp12	448-3LV	-	0	-	0	-	0	-	0	-	-	NDM-5;OXA-48	CTX-M-15	aadA2^;rmtB	-	-	-	-	catII.2*	-	sul1	-	-	dfrA12^	TEM-1D.v1^	-	SHV-28^	-	OmpK35-49%;OmpK36GD	MgrB-49%	GyrA-83F;GyrA-87A;ParC-80I	KL19	K19	-	Typeable	98.04%	-	O1/O2v2	O2afg	-	Typeable
862456	2020-04-21	Georgia	Blood	ST15	no	no	SAMN54589083	ybt 16; ICEKp12	448-3LV	-	0	-	0	-	0	-	0	-	-	NDM-5;OXA-48	CTX-M-15	aadA2^;rmtB	-	-	-	-	catII.2*	-	sul1	-	-	dfrA12^	TEM-1D.v1^	-	SHV-28^	-	OmpK35-49%;OmpK36GD	-	GyrA-83F;GyrA-87A;ParC-80I	KL19	K19	-	Typeable	98.04%	-	O1/O2v2	O2afg	-	Typeable
862528	2020-05-05	Georgia	Blood	ST15	no	no	SAMN54589090	ybt 16; ICEKp12	448-3LV	-	0	-	0	-	0	-	0	-	-	NDM-5;OXA-48	CTX-M-15	aadA2^;rmtB	-	-	-	-	catII.2*	-	sul1	-	-	dfrA12^	TEM-1D.v1^	-	SHV-28^	-	OmpK35-49%;OmpK36GD	-	GyrA-83F;GyrA-87A;ParC-80I	KL19	K19	-	Typeable	98.04%	-	O1/O2v2	O2afg	-	Typeable
862608	2020-05-19	Georgia	Fluid	ST15	no	no	SAMN54589098	ybt 16; ICEKp12	448-3LV	-	0	-	0	-	0	-	0	-	-	NDM-5;OXA-48	CTX-M-15	aadA2^;rmtB	-	-	-	-	catII.2*	-	sul1	-	-	dfrA12^	TEM-1D.v1^	-	SHV-28^	-	OmpK35-49%;OmpK36GD	-	GyrA-83F;GyrA-87A;ParC-80I	KL19	K19	-	Typeable	98.04%	-	O1/O2v2	O2afg	-	Typeable
884692	2020-06-02	Georgia	Blood	ST15	no	no	SAMN54589304	ybt 16; ICEKp12	448-3LV	-	0	-	0	-	0	-	0	-	-	NDM-5;OXA-48	CTX-M-15	aadA2^;rmtB	-	-	-	-	catII.2*	-	sul1	-	-	dfrA12^	TEM-1D.v1^	-	SHV-28^	-	OmpK35-49%;OmpK36GD	-	GyrA-83F;GyrA-87A;ParC-80I	KL19	K19	-	Typeable	98.04%	-	O1/O2v2	O2afg	-	Typeable
884730	2020-06-16	Georgia	Pus	ST15	no	no	SAMN54589308	ybt 16; ICEKp12	448-3LV	-	0	-	0	-	0	-	0	-	-	NDM-5;OXA-48	CTX-M-15	aadA2^;rmtB	-	-	-	-	catII.2*	-	sul1	-	-	dfrA12^	TEM-1D.v1^	-	SHV-28^	-	OmpK35-49%;OmpK36GD	-	GyrA-83F;GyrA-87A;ParC-80I	KL19	K19	-	Typeable	98.04%	-	O1/O2v2	O2afg	-	Typeable
884886	2020-08-25	Georgia	Blood	ST15	no	no	SAMN54589323	ybt 16; ICEKp12	448-3LV	-	0	-	0	-	0	-	0	-	-	NDM-5;OXA-48	CTX-M-15	aadA2^;rmtB	-	-	-	-	catII.2*	-	sul1	-	-	dfrA12^	TEM-1D.v1^	-	SHV-28^	-	OmpK35-49%;OmpK36GD	MgrB-60%	GyrA-83F;GyrA-87A;ParC-80I	KL19	K19	-	Typeable	98.04%	-	O1/O2v2	O2afg	?2	Typeable
884894	2020-08-25	Georgia	Fluid	ST15	no	no	SAMN54589324	ybt 16; ICEKp12	448-3LV	-	0	-	0	-	0	-	0	-	-	NDM-5;OXA-48	CTX-M-15	aadA2^;rmtB	-	-	-	-	catII.2*	-	sul1	-	-	dfrA12^	TEM-1D.v1^	-	SHV-28^	-	OmpK35-49%;OmpK36GD	MgrB-60%	GyrA-83F;GyrA-87A;ParC-80I	KL19	K19	-	Typeable	98.04%	-	O1/O2v2	O2afg	?2	Typeable
884916	2020-08-25	Georgia	Urine	ST15	no	no	SAMN54589326	ybt 16; ICEKp12	448-3LV	-	0	-	0	-	0	-	0	-	-	NDM-5;OXA-48	CTX-M-15	aadA2^;rmtB	-	-	-	-	catII.2*	-	sul1	-	-	dfrA12^	TEM-1D.v1^	-	SHV-28^	-	OmpK35-49%;OmpK36GD	-	GyrA-83F;GyrA-87A;ParC-80I	KL19	K19	?2	Typeable	98.10%	-	O1/O2v2	O2afg	-	Typeable
908205	2020-12-15	Georgia	Blood	ST395	no	no	SAMN54589351	ybt 16; ICEKp12	530-2LV	-	0	-	0	-	0	-	0	-	-	NDM-5;OXA-48	CTX-M-15	aac(3)-IIa.v1^;aac(6')-Ib-cr.v2	-	-	qnrS1	-	catA1^	-	sul1	tet(A).v1	-	dfrA1.v1	OXA-1;TEM-1D.v1^	-	SHV-11	35Q	OmpK35-72%	-	GyrA-83I;ParC-80I	KL2	K2	-	Typeable	99.84%	-	O1/O2v1	O1ab	-	Typeable
861902	2020-01-08	Georgia	Blood	ST105	no	no	SAMN54589028	ybt 14; ICEKp5	151-1LV	-	0	-	0	-	0	-	0	-	-	NDM-5	CTX-M-3	aadA2^;rmtB	-	-	-	-	catA1^	-	sul1	tet(D)	-	dfrA12^	TEM-1D.v1^	-	SHV-1^	-	-	-	-	KL102	Capsule null	!	Typeable	99.62%	-	O1/O2v2	O2afg	-	Typeable
861978	2020-01-14	Georgia	Respiratory	ST15	no	no	SAMN54589035	ybt 16; ICEKp12	448-3LV	-	0	-	0	-	0	-	0	-	-	NDM-5	CTX-M-15	aadA2^;rmtB	-	-	-	-	catII.2*	-	sul1	-	-	dfrA12^	TEM-1D.v1^	-	SHV-28^	-	OmpK35-49%;OmpK36GD	-	GyrA-83F;GyrA-87A;ParC-80I	KL19	K19	?2	Typeable	98.04%	-	O1/O2v2	O2afg	?2	Typeable
861986	2020-01-14	Georgia	Respiratory	ST15	no	no	SAMN54589036	ybt 16; ICEKp12	448-3LV	-	0	-	0	-	0	-	0	-	-	NDM-5	CTX-M-15	aadA2^;rmtB	-	-	-	-	catII.2*	-	sul1	-	-	dfrA12^	TEM-1D.v1^	-	SHV-28^	-	OmpK35-49%;OmpK36GD	-	GyrA-83F;GyrA-87A;ParC-80I	KL19	K19	?2	Typeable	98.04%	-	O1/O2v2	O2afg	?2	Typeable
861994	2020-01-14	Georgia	Respiratory	ST15	no	no	SAMN54589037	ybt 16; ICEKp12	448-3LV	-	0	-	0	-	0	-	0	-	-	NDM-5	CTX-M-15	aadA2^;rmtB	-	-	-	-	catII.2*	-	sul1	-	-	dfrA12^	TEM-1D.v1^	-	SHV-28^	-	OmpK35-49%;OmpK36GD	-	GyrA-83F;GyrA-87A;ParC-80I	KL19	K19	?2-	Typeable	97.96%	KL19_04_wza;KL19_03_wzi;KL19_05_wzb	O1/O2v2	O2afg	?2	Typeable
884706	2020-06-02	Georgia	Blood	ST15	no	no	SAMN54589305	ybt 16; ICEKp12	448-3LV	-	0	-	0	-	0	-	0	-	-	NDM-5	CTX-M-15	aadA2^;rmtB	-	-	-	-	catII.2*	-	sul1	-	-	dfrA12^	TEM-1D.v1^	-	SHV-28^	-	OmpK35-49%;OmpK36GD	-	GyrA-83F;GyrA-87A;ParC-80I	KL19	K19	-	Typeable	98.04%	-	O1/O2v2	O2afg	-	Typeable
884798	2020-07-14	Georgia	Urine	ST15	no	no	SAMN54589314	ybt 16; ICEKp12	448-3LV	-	0	-	0	-	0	-	0	-	-	NDM-5	CTX-M-15	aadA2^;rmtB	-	-	-	-	catII.2*	-	sul1	-	-	dfrA12^	TEM-1D.v1^	-	SHV-28^	-	OmpK35-49%;OmpK36GD	-	GyrA-83F;GyrA-87A;ParC-80I	KL19	K19	-	Typeable	98.04%	-	O1/O2v2	O2afg	-	Typeable
1005371	2021-07-27	Georgia	Respiratory	ST147	no	no	SAMN54589481	-	0	-	0	-	0	-	0	-	0	-	-	NDM-1	CTX-M-15	aadA*;aph(3')-VI;armA	-	-	qnrS1	mphE.v2;msrE	-	-	sul1;sul2	-	-	dfrA5	OXA-9.v1	-	SHV-11^	35Q	OmpK36TD	-	GyrA-83I;ParC-80I	KL20	K20	-	Typeable	99.97%	-	O1/O2v1	O2a	-	Typeable
884676	2020-10-20	Georgia	Urine	ST15	no	no	SAMN54589303	ybt 16; ICEKp12	448-3LV	-	0	-	0	-	0	-	0	-	-	-	CTX-M-15	aadA2^;rmtB	-	-	-	-	catII.2*	-	sul1	-	-	dfrA12^	TEM-1D.v1^	-	SHV-28^	-	OmpK35-49%;OmpK36GD	-	GyrA-83F;GyrA-87A;ParC-80I	KL19	K19	-	Typeable	98.04%	-	O1/O2v2	O2afg	-	Typeable
862406	2020-03-27	Georgia	Respiratory	ST15	no	no	SAMN54589078	ybt 16; ICEKp12	448-3LV	-	0	-	0	-	0	-	0	-	-	-	CTX-M-15	-	-	-	-	-	catII.2*	-	sul1	-	-	dfrA12^	-	-	SHV-28^	-	OmpK35-49%;OmpK36GD	-	GyrA-83F;GyrA-87A;ParC-80I	KL19	K19	-	Typeable	98.04%	-	O1/O2v2	O2afg	-	Typeable
908385	2021-01-25	Georgia	Urine	ST15	no	no	SAMN54589368	ybt 16; ICEKp12 (truncated)	448-4LV	-	0	-	0	-	0	-	0	-	-	-	CTX-M-15	aadA*;armA;strA.v1*;strB.v1*	-	-	-	mphE.v2;msrE	catII.2*	arr-3	sul1;sul2	-	-	dfrA27	-	-	SHV-28^	-	OmpK35-49%;OmpK36GD	-	GyrA-83F;GyrA-87A;ParC-80I	KL19	K19	-	Typeable	98.04%	-	O1/O2v2	O1ab	-	Typeable
884650	2020-07-28	Georgia	Fluid	ST15	no	no	SAMN54589301	ybt 16; ICEKp12	448-3LV	-	0	-	0	-	0	-	0	-	-	-	CTX-M-15	aadA2^	-	-	-	-	catII.2*	-	sul1	-	-	dfrA12^	-	-	SHV-28^	-	OmpK35-49%;OmpK36GD	-	GyrA-83F;GyrA-87A;ParC-80I	KL19	K19	-	Typeable	98.04%	-	O1/O2v2	O2afg	-	Typeable
861928	2020-01-08	Georgia	Blood	ST16	no	no	SAMN54589030	-	0	-	0	-	0	-	0	-	0	-	-	NDM-5	CTX-M-15	aac(6')-Ib-cr.v2;aadA2^	-	-	-	Mrx;mphA	-	-	sul1	-	-	dfrA12	OXA-1;TEM-1D.v1^	-	SHV-1	-	-	-	GyrA-83F;GyrA-87N;ParC-84K	KL51	K51	-	Typeable	99.96%	-	O3b	O3b	-	Typeable
861944	2020-01-08	Georgia	Urine	ST16	no	no	SAMN54589032	-	0	-	0	-	0	-	0	-	0	-	-	NDM-5	CTX-M-15	aac(6')-Ib-cr.v2;aadA2^	-	-	-	Mrx;mphA	-	-	sul1	-	-	dfrA12	OXA-1;TEM-1D.v1^	-	SHV-1	-	-	-	GyrA-83F;GyrA-87N;ParC-84K	KL51	K51	-	Typeable	99.95%	-	O3b	O3b	-	Typeable
862422	2020-04-07	Georgia	Fluid	ST290	no	no	SAMN54589080	ybt 14; ICEKp5	393-1LV	-	0	-	0	-	0	-	0	-	-	NDM-5	CTX-M-14;CTX-M-3;VEB-1	aac(6')-Ia*;aadA*;ant(2'')-Ia;rmtB;strA.v1^;strB.v1	-	-	-	-	cmlA5	arr-2	sul1;sul2	tet(A).v1	-	dfrA1.v1	OXA-10;TEM-1D.v1^	-	SHV-1	-	OmpK35-7%	-	-	KL21	K21	-	Typeable	99.31%	-	O1/O2v1	O1ab	!	Typeable
884756	2020-06-30	Georgia	Blood	ST290	no	no	SAMN54589310	ybt 14; ICEKp5	393-1LV	-	0	-	0	-	0	-	0	-	-	NDM-5	CTX-M-14;CTX-M-3;VEB-1	aac(6')-Ia*;aadA*;ant(2'')-Ia;rmtB	-	-	-	-	cmlA5	arr-2	sul1	-	-	-	OXA-10;TEM-1D.v1^	-	SHV-1	-	OmpK35-7%	-	-	KL21	K21	-	Typeable	99.31%	-	O1/O2v1	O1ab	!	Typeable
862140	2020-02-18	Georgia	Blood	ST290	no	no	SAMN54589052	ybt 14; ICEKp5	393-1LV	-	0	-	0	-	0	-	0	-	-	NDM-5	CTX-M-14;CTX-M-3	ant(2'')-Ia;rmtB;strA.v1^;strB.v1	-	-	-	-	-	-	sul1;sul2	tet(A).v1	-	dfrA1.v1	TEM-1D.v1^	-	SHV-1	-	OmpK35-7%	-	-	KL21	K21	-	Typeable	99.31%	-	O1/O2v1	O1ab	!	Typeable
862204	2020-03-04	Georgia	Blood	ST290	no	no	SAMN54589058	ybt 14; ICEKp5	393-1LV	-	0	-	0	-	0	-	0	-	-	NDM-5	CTX-M-14;CTX-M-3	ant(2'')-Ia;rmtB;strA.v1^;strB.v1	-	-	-	-	-	-	sul1;sul2	tet(A).v1	-	dfrA1.v1	TEM-1D.v1^	-	SHV-1	-	OmpK35-7%	-	-	KL21	K21	-	Typeable	99.31%	-	O1/O2v1	O1ab	!	Typeable
861952	2020-01-08	Georgia	Urine	ST307	no	no	SAMN54589033	ybt 10; ICEKp4	384	-	0	-	0	-	0	-	0	-	-	NDM-5	CTX-M-15	aac(3)-IIa.v1^;aac(6')-Ib-cr.v2;aadA2^;strA.v1^;strB.v1	-	-	-	-	-	-	sul1;sul2	-	-	dfrA12^;dfrA14.v2*	OXA-1;TEM-1D.v1^	-	SHV-28^	-	OmpK35-21%	-	GyrA-83I;ParC-80I	KL102	Capsule null	!	Typeable	99.64%	-	O1/O2v2	O2afg	-	Typeable
1005275	2021-07-13	Georgia	Respiratory	ST1517	no	no	SAMN54589479	-	0	-	0	-	0	-	0	-	0	-	-	-	CTX-M-15	aadA2^;aph3-Ia.v1^;strA.v1*;strB.v1*	-	-	qnrS1	Mrx;mphA	-	-	sul1;sul2	tet(A).v1	-	dfrA12	-	-	SHV-11^	35Q	-	-	-	KL15	K15	-	Typeable	99.84%	-	O4	O4	-	Typeable
1006035	2021-09-28	Georgia	Respiratory	ST395	no	no	SAMN54589500	ybt 16; ICEKp12 (truncated)	530-4LV	-	0	-	0	-	0	-	0	-	-	NDM-1;OXA-48	CTX-M-15	aac(6')-Ib-cr.v2	-	-	qnrS1	Mrx;mphA*	catA1^	-	sul1	tet(A).v1	-	dfrA1.v1;dfrA5	OXA-1;TEM-103?	-	SHV-11	35Q	OmpK35-72%;OmpK36GD	-	GyrA-83I;ParC-80I	KL2	K2	?3	Typeable	99.84%	-	O1/O2v1	O1ab	?2	Typeable
1005283	2021-07-13	Georgia	Blood	ST36	no	no	SAMN54589480	-	0	-	0	-	0	-	0	-	0	-	-	-	CTX-M-14	aac(3)-IId^;strA.v1^;strB.v1	-	-	qnrS1	-	catII.2*	-	sul1;sul2	tet(A).v1;tet(D)	-	dfrA1.v1	LAP-2	-	SHV-11^	35Q	-	-	-	KL27	K27	-	Typeable	100.00%	-	O1/O2v2	O2afg	-	Typeable
862472	2020-04-21	Georgia	Respiratory	ST219	no	no	SAMN54589085	ybt 13; ICEKp2	303-1LV	-	0	-	0	-	0	-	0	-	-	-	CTX-M-15	strA.v1*;strB.v1*	-	-	qnrS1	-	-	-	sul2	-	-	-	-	-	SHV-1^	-	-	-	-	KL114	unknown (KL114)	-	Typeable	99.85%	-	O1/O2v1	O1ab	-	Typeable
1005687	2021-08-24	Georgia	Urine	ST15	no	no	SAMN54589495	ybt 16; ICEKp12 (truncated)	448-3LV	-	0	-	0	-	0	-	0	-	-	NDM-5;OXA-48	CTX-M-15	strB.v1	-	-	qnrB6^	-	catII.2*	arr-3	sul1;sul2	-	-	dfrA27	TEM-1D.v1^	-	SHV-28^	-	OmpK35-49%;OmpK36GD	-	GyrA-83F;GyrA-87A;ParC-80I	KL19	K19	-	Typeable	98.04%	-	O1/O2v2	O2afg	-	Typeable
946595	2021-05-18	Georgia	Fluid	ST15	no	no	SAMN54589406	ybt 16; ICEKp12	448-3LV	-	0	-	0	-	0	-	0	-	-	NDM-5;OXA-48	-	aac(6')-Ib-cr.v2;aadA16*;strB.v1	-	-	qnrB6^	-	catII.2*	arr-3	sul1;sul2	-	-	dfrA27	TEM-1D.v1^	-	SHV-28^	-	OmpK35-49%;OmpK36GD	-	GyrA-83F;GyrA-87A;ParC-80I	KL19	K19	-	Typeable	98.04%	-	O1/O2v2	O2afg	-	Typeable
884836	2020-07-28	Georgia	Fluid	ST307	no	no	SAMN54589318	ybt 10; ICEKp4	384	-	0	-	0	-	0	-	0	-	-	NDM-5	CTX-M-15	aac(6')-Ib-cr.v2;aadA5;armA;rmtB;strA.v1^;strB.v1	-	-	qnrB1.v2^	mphE.v2;msrE	-	-	sul1;sul2	tet(A).v1	-	dfrA14.v2*;dfrA17	OXA-1;TEM-1D.v1^	-	SHV-28^	-	OmpK35-21%	-	GyrA-83I;ParC-80I	KL102	unknown (KL102)	-	Typeable	99.66%	-	O1/O2v2	O2afg	-	Typeable
884990	2020-10-06	Georgia	Respiratory	ST307	no	no	SAMN54589334	ybt 10; ICEKp4	384	-	0	-	0	-	0	-	0	-	-	NDM-5	CTX-M-15	aac(6')-Ib-cr.v2;aadA5;armA;rmtB;strA.v1^;strB.v1	-	-	qnrB1.v2^	mphE.v2;msrE	-	-	sul1;sul2	tet(A).v1	-	dfrA14.v2*;dfrA17	OXA-1;TEM-1D.v1^	-	SHV-28^	-	OmpK35-21%	-	GyrA-83I;ParC-80I	KL102	unknown (KL102)	-	Typeable	99.66%	-	O1/O2v2	O2afg	-	Typeable
908221	2020-12-15	Georgia	Respiratory	ST307	no	no	SAMN54589353	-	0	-	0	-	0	-	0	-	0	-	-	NDM-5	CTX-M-15	aac(3)-IIa.v1^;aac(6')-Ib-cr.v2;strA.v1^;strB.v1	-	-	-	-	-	-	sul1;sul2	-	-	dfrA14.v2*	OXA-1;TEM-1D.v1^	-	SHV-28^	-	-	-	GyrA-83I;ParC-80I	KL102	unknown (KL102)	-	Typeable	99.66%	-	O1/O2v2	O2afg	-	Typeable
862028	2020-01-14	Georgia	Fluid	ST309	no	no	SAMN54589040	-	0	-	0	-	0	-	0	-	0	-	-	NDM-5	-	aadA5;armA	-	-	-	mphE.v2;msrE	-	-	sul1	-	-	dfrA17	-	-	SHV-11^	35Q	OmpK35-25%	-	-	KL42	K42	!	Typeable	99.99%	-	O4	O4	-	Typeable
862334	2020-03-17	Georgia	Urine	ST309	no	no	SAMN54589071	-	0	-	0	-	0	-	0	-	0	-	-	NDM-5	-	aac(6')-Ib'.v1;aadA*;aadA5;armA	-	-	-	mphE.v2;msrE	-	-	sul1	-	-	dfrA17	-	-	SHV-11^	35Q	OmpK35-25%	-	-	KL42	K42	!	Typeable	100.00%	-	O4	O4	-	Typeable
884860	2020-08-11	Georgia	Blood	ST290	no	no	SAMN54589321	ybt 14; ICEKp5	393-1LV	-	0	-	0	-	0	-	0	-	-	-	CTX-M-14;CTX-M-3	-	-	-	-	-	-	-	-	-	-	-	TEM-1D.v1^	-	SHV-1	-	OmpK35-7%	-	-	KL21	K21	-	Typeable	99.31%	-	O1/O2v1	O1ab	!	Typeable
862190	2020-03-04	Georgia	Blood	ST290	no	no	SAMN54589057	ybt 14; ICEKp5	393-1LV	-	0	-	0	-	0	-	0	-	-	-	CTX-M-14	strA.v1^;strB.v1	-	-	-	-	-	-	sul1;sul2	tet(A).v1	-	dfrA1.v1	TEM-1D.v1^	-	SHV-1	-	OmpK35-8%	-	-	KL21	K21	-	Typeable	99.31%	-	O1/O2v1	O1ab	!	Typeable
862342	2020-03-27	Georgia	Respiratory	ST307	no	no	SAMN54589072	-	0	-	0	-	0	-	0	-	0	-	-	-	CTX-M-15	aac(3)-IIa.v1^;aac(6')-Ib-cr.v2;strA.v1^;strB.v1	-	-	qnrB1.v2^	-	-	-	sul2	tet(A).v1	-	dfrA14.v2*	OXA-1;TEM-1D.v1^	-	SHV-28^	-	-	-	GyrA-83I;ParC-80I	KL102	unknown (KL102)	-	Typeable	99.66%	-	O1/O2v2	O2afg	-	Typeable
862552	2020-05-05	Georgia	Blood	ST309	no	no	SAMN54589093	-	0	-	0	-	0	-	0	-	0	-	-	-	-	aac(6')-Ib'.v1;aadA*;aadA5;armA	-	-	-	mphE.v2;msrE	-	-	sul1	-	-	dfrA17	-	-	SHV-11^	35Q	OmpK35-25%	-	-	KL42	K42	!	Typeable	99.99%	-	O4	O4	-	Typeable
908327	2021-01-11	Georgia	Urine	ST15	no	no	SAMN54589362	ybt 16; ICEKp12	448-3LV	-	0	-	0	-	0	-	0	-	-	NDM-5	CTX-M-15	aadA2^;rmtB	-	-	-	-	catII.2*	-	sul1	-	-	dfrA12^	TEM-1D.v1^	-	SHV-28^	-	OmpK35-49%;OmpK36GD	-	GyrA-83F;GyrA-87A;ParC-80I	KL19	K19	-	Typeable	98.03%	-	O1/O2v2	O2afg	-	Typeable
908659	2021-04-06	Georgia	Respiratory	ST290	no	no	SAMN54589394	ybt 14; ICEKp5	393-1LV	-	0	-	0	-	0	-	0	-	-	NDM-5	CTX-M-14;CTX-M-3;VEB-1	aac(6')-Ia*;aadA*;ant(2'')-Ia;rmtB	-	-	-	-	cmlA5	arr-2	sul1	-	-	-	OXA-10;TEM-1D.v1^	-	SHV-1	-	OmpK35-7%	-	-	KL21	K21	-	Typeable	99.31%	-	O1/O2v1	O1ab	!	Typeable
804348	2018-12-21	Georgia	Urine	ST147	no	no	SAMN54588949	-	0	-	0	-	0	-	0	-	0	-	-	NDM-1	CTX-M-15	aac(6')-Ib-cr.v2;aadA*;armA;rmtC	-	-	-	mphE.v2;msrE*	cmlA5	arr-2	sul1	-	-	-	OXA-1;OXA-10;TEM-1D.v1^	-	SHV-11^	35Q	OmpK36GD	-	GyrA-83I;ParC-80I	KL64	K64	?2	Typeable	99.99%	-	O1/O2v1	O2ac	-	Typeable
803860	2018-01-25	Georgia	Blood	ST15	no	no	SAMN54588901	ybt 15; ICEKp11	230-1LV	-	0	-	0	-	0	-	0	-	-	-	CTX-M-15	aac(6')-Ib-cr.v2;aadA16*;strA.v1*;strB.v1*	-	-	qnrB6^	-	catII.2*	arr-3	sul1;sul2	-	-	dfrA27	TEM-1D.v1^	-	SHV-28^	-	OmpK35-49%	-	GyrA-83I;ParC-80I	KL27	K27	-	Typeable	99.98%	-	O1/O2v2	O1ab	-	Typeable
803916	2018-01-25	Georgia	Blood	ST15	no	no	SAMN54588906	ybt 15; ICEKp11	230-1LV	-	0	-	0	-	0	-	0	-	-	-	CTX-M-15	aac(6')-Ib-cr.v2;aadA16*;strA.v1*;strB.v1*	-	-	qnrB6^	-	catII.2*	arr-3	sul1;sul2	-	-	dfrA27	TEM-1D.v1^	-	SHV-28^	-	OmpK35-49%	-	GyrA-83I;ParC-80I	KL27	K27	-	Typeable	99.98%	-	O1/O2v2	O1ab	-	Typeable
804074	2018-06-22	Georgia	Urine	ST15	no	no	SAMN54588922	-	0	-	0	-	0	-	0	-	0	-	-	-	-	aadA*;aadA16*;strA.v1*;strB.v1*	-	-	qnrB6^	-	catII.2*	arr-3	sul1;sul2	-	-	dfrA27	-	-	SHV-28^	-	OmpK35-49%	-	GyrA-83F;GyrA-87A;ParC-80I	KL19	K19	?2	Typeable	97.81%	-	O1/O2v2	O1ab	-	Typeable
804154	2018-09-20	Georgia	Blood	ST15	no	no	SAMN54588930	ybt 16; ICEKp12	448-3LV	-	0	-	0	-	0	-	0	-	-	-	-	aadA*;aadA16*;armA;strA.v1*;strB.v1*	-	-	qnrB6^	mphE.v2;msrE	catII.2*	arr-3	sul1;sul2	-	-	dfrA27	-	-	SHV-28^	-	OmpK35-49%	-	GyrA-83F;GyrA-87A;ParC-80I	KL19	K19	-	Typeable	98.04%	-	O1/O2v2	O1ab	-	Typeable
803714	2017-10-20	Georgia	Blood	ST16	no	no	SAMN54588886	ybt 10; ICEKp4	91-1LV	-	0	-	0	-	0	-	0	-	-	-	CTX-M-15	aac(6')-Ib-cr.v2;aadA2^;aph3-Ia.v1^	-	-	-	Mrx;mphA	-	-	sul1	tet(A).v1	-	dfrA12	OXA-1;TEM-1D.v1^	-	SHV-1	-	-	-	GyrA-83F;GyrA-87N;ParC-84K	KL51	K51	-	Typeable	100.00%	-	O3b	O3b	-	Typeable
803722	2017-10-20	Georgia	Blood	ST16	no	no	SAMN54588887	ybt 10; ICEKp4	91-1LV	-	0	-	0	-	0	-	0	-	-	-	CTX-M-15	aac(6')-Ib-cr.v2;aadA2^;aph3-Ia.v1^	-	-	-	Mrx;mphA	-	-	sul1	tet(A).v1	-	dfrA12	OXA-1;TEM-1D.v1^	-	SHV-1	-	-	-	GyrA-83F;GyrA-87N;ParC-84K	KL51	K51	-	Typeable	100.00%	-	O3b	O3b	-	Typeable
1005599	2021-08-10	Georgia	Pus	ST395	no	no	SAMN54589489	ybt 16; ICEKp12	530-2LV	-	0	-	0	-	0	-	0	-	-	NDM-5;OXA-48	CTX-M-15	aac(3)-IIa.v1^;aac(6')-Ib-cr.v2	-	-	qnrS1	-	catA1^	-	sul1	tet(A).v1	-	dfrA1.v1	OXA-1;TEM-1D.v1^	-	SHV-11	35Q	OmpK35-72%	-	GyrA-83I;ParC-80I	KL2	K2	-	Typeable	99.84%	-	O1/O2v1	O1ab	-	Typeable
861848	2019-12-18	Georgia	Respiratory	ST15	no	no	SAMN54589022	ybt 16; ICEKp12	448-3LV	-	0	-	0	-	0	-	0	-	-	-	CTX-M-15	aadA*;strA.v1*;strB.v1*	-	-	qnrB6^	-	-	-	sul1;sul2	-	-	-	-	-	SHV-28^	-	OmpK35-49%;OmpK36GD	-	GyrA-83F;GyrA-87A;ParC-80I	KL19	K19	-	Typeable	98.04%	-	O1/O2v2	O1ab	-	Typeable
861814	2019-12-10	Georgia	Blood	ST16	no	no	SAMN54589019	-	0	-	0	-	0	-	0	-	0	-	-	NDM-5	CTX-M-15	aac(6')-Ib-cr.v2;armA	-	-	-	Mrx;mphA;mphE.v2;msrE	-	-	sul1	-	-	dfrA12	OXA-1;TEM-1D.v1^	-	SHV-1	-	-	-	GyrA-83F;GyrA-87N;ParC-84K	KL51	K51	-	Typeable	99.99%	-	O3b	O3b	-	Typeable
861776	2019-12-03	Georgia	Blood	ST16	no	no	SAMN54589016	ybt 10; ICEKp4	91-1LV	-	0	-	0	-	0	-	0	-	-	-	CTX-M-15	aac(6')-Ib-cr.v2;aadA2^;aph3-Ia.v1^	-	-	-	Mrx;mphA	-	-	sul1	tet(A).v1	-	dfrA12	OXA-1;TEM-1D.v1^	-	SHV-1	-	-	-	GyrA-83F;GyrA-87N;ParC-84K	KL51	K51	!	Typeable	100.00%	-	O3b	O3b	-	Typeable
804364	2019-01-17	Georgia	Urine	ST219	no	no	SAMN54588951	ybt 28; ICEKp6	222-5LV	-	0	-	0	-	0	-	0	-	-	-	CTX-M-15	aadA2^;strA.v1*;strB.v1*	-	-	qnrS1	Mrx;mphA	-	-	sul1;sul2	-	-	dfrA12	-	-	SHV-1^	-	-	-	-	KL114	unknown (KL114)	-	Typeable	99.85%	-	O1/O2v1	O1ab	-	Typeable
862132	2020-02-18	Georgia	Urine	ST395	no	no	SAMN54589051	ybt 16; ICEKp12	530-2LV	-	0	-	0	-	0	-	0	-	-	NDM-5	-	-	-	-	-	-	-	-	sul1	-	-	-	-	-	SHV-11	35Q	OmpK35-72%	-	GyrA-83I;ParC-80I	KL2	K2	-	Typeable	99.84%	-	O1/O2v1	O2a	-	Typeable
862044	2020-01-14	Georgia	Blood	ST45	no	no	SAMN54589042	ybt 10; ICEKp4	80	-	0	-	0	-	0	-	0	-	-	NDM-5	CTX-M-3	ant(2'')-Ia;rmtB	-	-	-	-	-	-	sul1	-	-	-	TEM-1D.v1^	-	SHV-1	-	-	-	-	KL52	K52	?3!	Typeable	99.94%	-	OL13	O13	?3!	Typeable
862212	2020-03-04	Georgia	Urine	ST45	no	no	SAMN54589059	ybt 10; ICEKp4	80	-	0	-	0	-	0	-	0	-	-	NDM-5	CTX-M-15	aac(6')-Ib-cr.v2;aadA2^;rmtB;strA.v1^;strB.v1	-	-	-	-	-	-	sul1;sul2*	-	-	dfrA12^	OXA-1;TEM-1D.v1^	-	SHV-1	-	OmpK35-30%	-	-	KL52	K52	?5!	Typeable	99.95%	-	OL13	O13	?3!	Typeable
862060	2020-01-21	Georgia	Blood	ST610	no	no	SAMN54589044	ybt 9; ICEKp3	209-1LV	-	0	-	0	-	0	-	0	-	-	NDM-5	CTX-M-3	aadA*;aadA2^;rmtB	-	-	-	-	-	-	sul1	-	-	dfrA12^	OXA-1;TEM-1D.v1^	-	SHV-11^	35Q	-	-	-	KL55	K55	-	Typeable	98.83%	-	O3/O3a	O3/O3a	-	Typeable
862078	2020-01-21	Georgia	Blood	ST610	no	no	SAMN54589045	ybt 9; ICEKp3	209-1LV	-	0	-	0	-	0	-	0	-	-	NDM-5	CTX-M-3	aadA*;aadA2^	-	-	-	-	-	-	sul1	-	-	dfrA12^	OXA-1;TEM-1D.v1^	-	SHV-11^	35Q	-	-	-	KL55	K55	-	Typeable	98.83%	-	O3/O3a	O3/O3a	-	Typeable
1005073	2019-09-13	Georgia	Urine	ST280	no	no	SAMN54589478	-	0	-	0	-	0	-	0	-	0	-	-	-	CTX-M-15	aac(6')-Ib-cr.v2;strA.v1^;strB.v1	-	-	qnrB1.v2^	-	-	-	sul2	tet(A).v1	-	dfrA14.v2*	OXA-1;TEM-1D.v1^	-	SHV-27	156D	-	-	-	KL23	K23	-	Typeable	99.98%	-	O1/O2v2	O2afg	?2	Typeable
861880	2019-12-26	Georgia	Blood	ST290	no	no	SAMN54589026	ybt 14; ICEKp5	393-1LV	-	0	-	0	-	0	-	0	-	-	NDM-5	CTX-M-14;CTX-M-3	aadA2^;rmtB;strA.v1^;strB.v1	-	-	qnrS1	-	catII.2*	-	sul1;sul2	tet(A).v1;tet(D)	-	dfrA1.v1;dfrA12^	LAP-2;TEM-1D.v1^	-	SHV-1	-	-	-	-	KL21	K21	-	Typeable	99.31%	-	O1/O2v1	O1ab	!	Typeable
804410	2019-02-07	Georgia	Urine	ST307	no	no	SAMN54588956	ybt 10; ICEKp4	384	-	0	-	0	-	0	-	0	-	-	NDM-5	CTX-M-3	aac(3)-IIa.v1^;aac(6')-Ib-cr.v2;aadA2^;rmtB;strA.v1^;strB.v1	-	-	-	-	-	-	sul1;sul2	-	-	dfrA12^;dfrA14.v2*	OXA-1;TEM-1D.v1^	-	SHV-28^	-	OmpK35-21%	-	GyrA-83I;ParC-80I	KL102	unknown (KL102)	-	Typeable	99.66%	-	O1/O2v2	O2afg	-	Typeable
862430	2020-04-21	Georgia	Blood	ST610	no	no	SAMN54589081	ybt 9; ICEKp3	209-1LV	-	0	-	0	-	0	-	0	-	-	NDM-5	CTX-M-3	aadA*;aadA2^;rmtB	-	-	-	-	-	-	sul1	-	-	dfrA12^	OXA-1;TEM-1D.v1^	-	SHV-11^	35Q	-	-	-	KL55	K55	-	Typeable	98.83%	-	O3/O3a	O3/O3a	-	Typeable
908473	2021-02-23	Georgia	Respiratory	ST395	no	no	SAMN54589377	ybt 16; ICEKp12	530-2LV	-	0	-	0	-	0	-	0	-	-	NDM-5	CTX-M-15	aac(6')-Ib-cr.v2;aadA5;armA;rmtB	-	-	qnrS1	mphE.v2;msrE	catA1^	-	sul1	tet(A).v1	-	dfrA1.v1;dfrA17	OXA-1;TEM-1D.v1^	-	SHV-11	35Q	OmpK35-72%	-	GyrA-83I;ParC-80I	KL2	K2	-	Typeable	99.84%	-	O1/O2v1	O1ab	-	Typeable
861768	2019-11-26	Georgia	Urine	ST309	no	no	SAMN54589015	-	0	-	0	-	0	-	0	-	0	-	-	-	-	aac(6')-Ib'.v1;aadA*;aadA5	-	-	-	-	-	-	sul1	-	-	dfrA17	-	-	SHV-11^	35Q	OmpK35-25%;OmpK36_c25t	-	-	KL42	K42	?2!	Typeable	99.99%	-	O4	O4	?2	Typeable
1005679	2021-08-24	Georgia	Urine	ST610	no	no	SAMN54589494	ybt 9; ICEKp3	209-1LV	-	0	-	0	-	0	-	0	-	-	NDM-5	CTX-M-3	aadA*;aadA2^;rmtB	-	-	-	-	-	-	sul1	-	-	dfrA12^	OXA-1;TEM-1D.v1^	-	SHV-11^	35Q	-	-	-	KL55	K55	-	Typeable	98.83%	-	O3/O3a	O3/O3a	-	Typeable
884828	2020-07-28	Georgia	Wound	ST15	no	no	SAMN54589317	ybt 16; ICEKp12	448-3LV	-	0	-	0	-	0	-	0	-	-	OXA-48	CTX-M-15	strA.v1*;strB.v1*	-	-	qnrB6^	-	catII.2*	arr-3	sul1;sul2	-	-	dfrA27	TEM-1D.v1^	-	SHV-28^	-	OmpK35-49%;OmpK36GD	MgrB-51%	GyrA-83F;GyrA-87A;ParC-80I	KL19	K19	?2	Typeable	98.04%	-	O1/O2v2	O1ab	?2-	Typeable
1005821	2021-09-17	Georgia	Urine	ST610	no	no	SAMN54589497	ybt 9; ICEKp3	209-1LV	-	0	-	0	-	0	-	0	-	-	NDM-5	CTX-M-3	aadA*;rmtB	-	-	-	-	-	-	sul1	-	-	dfrA12^	OXA-1;TEM-1D.v1^	-	SHV-11^	35Q	-	-	-	KL55	K55	-	Typeable	98.82%	-	O3/O3a	O3/O3a	-	Typeable
1006085	2021-09-28	Georgia	Blood	ST101	no	no	SAMN54589505	ybt 9; ICEKp3	183-3LV	-	0	-	0	-	0	-	0	-	-	OXA-48	CTX-M-14^	aac(3)-IId^;aadA*;aadA16*;aph(3')-VIb*;aph3-Ia.v1;strA.v1^	-	-	qnrB2.v2^	Mrx;mphA	catB3.v2;floR.v1	arr-3	sul1	tet(A).v1?	-	dfrA14.v2*;dfrA27	OXA-1;OXA-9.v1	-	SHV-1^	-	OmpK35-17%;OmpK36GD	MgrB-62%	GyrA-83Y;GyrA-87N;ParC-80I	KL17	K17	-	Typeable	99.97%	-	O1/O2v1	O1ab	-	Typeable
1006051	2021-09-28	Georgia	Urine	ST15	no	no	SAMN54589502	ybt 16; ICEKp12	448-3LV	-	0	-	0	-	0	-	0	-	-	OXA-48	CTX-M-15	armA;strB.v1	-	-	qnrB6^	mphE.v2;msrE	catII.2*	arr-3	sul1;sul2	-	-	dfrA27	TEM-1D.v1^	-	SHV-28^	-	OmpK35-49%;OmpK36GD	-	GyrA-83F;GyrA-87A;ParC-80I	KL19	K19	-	Typeable	98.04%	-	O1/O2v2	O2afg	-	Typeable
804380	2019-01-31	Georgia	Blood	ST35	no	no	SAMN54588953	ybt 14; ICEKp5	151-1LV	-	0	-	0	-	0	-	0	-	-	-	CTX-M-15	aac(3)-IId^;aph3-Ia.v1^;strA.v1^;strB.v1	-	-	-	-	-	-	sul2*	tet(D)	-	-	-	-	SHV-33	-	-	-	-	KL22	K22	-	Typeable	99.79%	-	O1/O2v1	O1ab	-	Typeable
862544	2020-05-05	Georgia	Blood	ST610	no	no	SAMN54589092	ybt 9; ICEKp3	209-1LV	-	0	-	0	-	0	-	0	-	-	NDM-5	CTX-M-3	aadA*;aadA2^;rmtB	-	-	-	-	-	-	sul1	-	-	dfrA12^	OXA-1;TEM-1D.v1^	-	SHV-11^	35Q	-	-	-	KL55	K55	-	Typeable	98.83%	-	O3/O3a	O3/O3a	-	Typeable
884852	2020-08-11	Georgia	Blood	ST610	no	no	SAMN54589320	ybt 9; ICEKp3	209-1LV	-	0	-	0	-	0	-	0	-	-	NDM-5	CTX-M-3	aadA*;aadA2^;rmtB	-	-	-	-	-	-	sul1	-	-	dfrA12^	OXA-1;TEM-1D.v1^	-	SHV-11^	35Q	-	-	-	KL55	K55	-	Typeable	98.83%	-	O3/O3a	O3/O3a	-	Typeable
884932	2020-09-22	Georgia	Blood	ST610	no	no	SAMN54589328	ybt 9; ICEKp3	209-1LV	-	0	-	0	-	0	-	0	-	-	NDM-5	CTX-M-3	aadA*;aadA2^;rmtB	-	-	-	-	-	-	sul1	-	-	dfrA12^	OXA-1;TEM-1D.v1^	-	SHV-11^	35Q	-	-	-	KL55	K55	-	Typeable	98.83%	-	O3/O3a	O3/O3a	-	Typeable
884974	2020-10-06	Georgia	Blood	ST15	no	no	SAMN54589332	ybt 16; ICEKp12	448-3LV	-	0	-	0	-	0	-	0	-	-	OXA-48	CTX-M-15	strA.v1*;strB.v1*	-	-	qnrB6^	-	catII.2*	arr-3	sul1;sul2	-	-	dfrA27	TEM-1D.v1^	-	SHV-28^	-	OmpK35-49%;OmpK36GD	MgrB-49%	GyrA-83F;GyrA-87A;ParC-80I	KL19	K19	?2	Typeable	98.04%	-	O1/O2v2	O1ab	?2-	Typeable
885032	2020-11-03	Georgia	Respiratory	ST15	no	no	SAMN54589338	ybt 16; ICEKp12	448-3LV	-	0	-	0	-	0	-	0	-	-	OXA-48	CTX-M-15	armA	-	-	qnrS1	mphE.v2;msrE	catA1^	-	sul1	tet(A).v1	-	dfrA1.v1	TEM-1D.v1^	-	SHV-28^	-	OmpK35-49%;OmpK36GD	MgrB-62%	GyrA-83F;GyrA-87A;ParC-80I	KL19	K19	?2	Typeable	98.04%	-	O1/O2v2	O1ab	-	Typeable
862262	2020-03-10	Georgia	Respiratory	ST15	no	no	SAMN54589064	ybt 16; ICEKp12 (truncated)	448-4LV	-	0	-	0	-	0	-	0	-	-	OXA-48	CTX-M-15	aadA*;aadA16*;armA;strA.v1*;strB.v1*	-	-	qnrB6^	mphE.v2;msrE	catII.2*	arr-3	sul1;sul2	-	-	dfrA27	-	-	SHV-28^	-	OmpK35-49%;OmpK36GD	-	GyrA-83F;GyrA-87A;ParC-80I	KL19	K19	-	Typeable	98.04%	-	O1/O2v2	O1ab	-	Typeable
884780	2020-07-14	Georgia	Urine	ST15	no	no	SAMN54589313	ybt 16; ICEKp12 (truncated)	448-4LV	-	0	-	0	-	0	-	0	-	-	OXA-48	CTX-M-15	aadA*;armA;strA.v1*;strB.v1*	-	-	qnrB6^	mphE.v2;msrE	catII.2*	arr-3	sul1;sul2	-	-	dfrA27	-	-	SHV-28^	-	OmpK35-49%;OmpK36GD	-	GyrA-83F;GyrA-87A;ParC-80I	KL19	K19	-	Typeable	98.04%	-	O1/O2v2	O1ab	-	Typeable
1006043	2021-09-28	Georgia	Respiratory	ST395	no	no	SAMN54589501	ybt 16; ICEKp12 (truncated)	530-4LV	-	0	-	0	-	0	-	0	-	-	OXA-48	CTX-M-15	aac(6')-Ib-cr.v2;aph(3')-VIa*;armA	-	-	qnrS1	mphE.v2;msrE	catA1^	-	sul1	tet(A).v1	-	dfrA1.v1	OXA-1;TEM-1D.v1^	-	SHV-11	35Q	OmpK35-72%;OmpK36GD	MgrB-62%	GyrA-83I;ParC-80I	KL2	K2	?2	Typeable	99.84%	-	O1/O2v1	O1ab	?2	Typeable
804120	2018-08-23	Georgia	Blood	ST268	no	no	SAMN54588927	ybt 10; ICEKp4	481	-	0	-	0	-	0	-	0	-	-	-	CTX-M-15	strA.v1^	-	-	qnrB1.v2^	-	catA1^	-	sul2	tet(A).v1	-	dfrA14.v2*	TEM-1	-	SHV-11^	35Q	-	-	-	KL20	K20	?2	Typeable	99.97%	-	O1/O2v1	O2a	-	Typeable
804200	2018-10-11	Georgia	Blood	ST268	no	no	SAMN54588935	ybt 9; ICEKp3	208-1LV	-	0	-	0	-	0	-	0	-	-	-	-	-	-	-	-	-	-	-	-	-	-	-	-	-	SHV-1^	-	-	-	-	KL20	K20	-	Typeable	99.96%	-	O1/O2v1	O2a	-	Typeable
803974	2018-03-01	Georgia	Blood	ST290	no	no	SAMN54588912	ybt 14; ICEKp5	393	-	0	-	0	-	0	-	0	-	-	-	CTX-M-14	-	-	-	qnrS1	-	-	-	sul1	tet(A).v1	-	dfrA1.v1	LAP-2	-	SHV-1	-	-	-	-	KL21	K21	-	Typeable	99.31%	-	O1/O2v1	O1ab	-	Typeable
804226	2018-10-19	Georgia	Blood	ST307	no	no	SAMN54588937	ybt 10; ICEKp4	384	-	0	-	0	-	0	-	0	-	-	-	CTX-M-15	aac(6')-Ib-cr.v2;strA.v1^;strB.v1	-	-	qnrB1.v2^	-	-	-	sul2	tet(A).v1	-	dfrA14.v2*	OXA-1;TEM-1D.v1^	-	SHV-28^	-	OmpK35-21%	-	GyrA-83I;ParC-80I	KL102	unknown (KL102)	-	Typeable	99.66%	-	O1/O2v2	O2afg	-	Typeable
1006069	2021-09-28	Georgia	Respiratory	ST395	no	no	SAMN54589503	ybt 16; ICEKp12 (truncated)	530-4LV	-	0	-	0	-	0	-	0	-	-	OXA-48	CTX-M-15	aac(6')-Ib-cr.v2;armA	-	-	qnrS1	mphE.v2;msrE	catA1^	-	sul1	tet(A).v1	-	dfrA1.v1	OXA-1;TEM-1D.v1^	-	SHV-11	35Q	OmpK35-72%;OmpK36GD	MgrB-62%	GyrA-83I;ParC-80I	KL2	K2	?2	Typeable	99.84%	-	O1/O2v1	O1ab	?3	Typeable
1006077	2021-09-28	Georgia	Blood	ST395	no	no	SAMN54589504	ybt 16; ICEKp12 (truncated)	530-4LV	-	0	-	0	-	0	-	0	-	-	OXA-48	CTX-M-15	aac(6')-Ib-cr.v2;aph(3')-VIa*;armA	-	-	qnrS1	mphE.v2;msrE	catA1^	-	sul1	tet(A).v1	-	dfrA1.v1	OXA-1;TEM-1D.v1^	-	SHV-11	35Q	OmpK35-72%;OmpK36GD	MgrB-62%	GyrA-83I;ParC-80I	KL2	K2	?2	Typeable	99.84%	-	O1/O2v1	O1ab	?2	Typeable
884844	2020-07-28	Georgia	Blood	ST15	no	no	SAMN54589319	ybt 16; ICEKp12 (truncated)	448-4LV	-	0	-	0	-	0	-	0	-	-	OXA-48	CTX-M-15	aadA*;aadA16*;armA;strA.v1*;strB.v1*	-	-	qnrB6^	mphE.v2;msrE	catII.2*	arr-3	sul1;sul2	-	-	dfrA27	-	-	SHV-28^	-	OmpK35-49%;OmpK36GD	-	GyrA-83F;GyrA-87A;ParC-80I	KL19	K19	-	Typeable	98.04%	-	O1/O2v2	O1ab	-	Typeable
885040	2020-11-17	Georgia	Blood	ST610	no	no	SAMN54589339	ybt 9; ICEKp3	209-1LV	-	0	-	0	-	0	-	0	-	-	NDM-5	CTX-M-3	aadA*;aadA2^;rmtB	-	-	-	-	-	-	sul1	-	-	dfrA12^	OXA-1;TEM-1D.v1^	-	SHV-11^	35Q	-	-	-	KL55	K55	-	Typeable	98.83%	-	O3/O3a	O3/O3a	-	Typeable
862220	2020-03-10	Georgia	Respiratory	ST15	no	no	SAMN54589060	ybt 16; ICEKp12 (truncated)	448-4LV	-	0	-	0	-	0	-	0	-	-	OXA-48	-	armA	-	-	-	mphE.v2;msrE	catA1^	-	sul1	tet(A).v1	-	dfrA1.v1	-	-	SHV-28^	-	OmpK35-49%;OmpK36GD	MgrB-62%	GyrA-83F;GyrA-87A;ParC-80I	KL19	K19	?2	Typeable	98.03%	-	O1/O2v2	O1ab	-	Typeable
884570	2020-07-14	Georgia	Respiratory	ST395	no	no	SAMN54589293	-	0	-	0	-	0	-	0	-	0	-	-	-	CTX-M-3	aac(3)-IIa.v1*?;aac(6')-Ib-cr.v2;armA	-	-	-	mphE.v2;msrE	catA1^	-	-	tet(A).v1	-	dfrA1.v1	OXA-1;TEM-1D.v1^	-	SHV-11	35Q	OmpK35-72%	-	GyrA-83I;ParC-80I	KL2	K2	-	Typeable	99.84%	-	O1/O2v1	O1ab	?2	Typeable
862384	2020-03-27	Georgia	Urine	ST395	no	no	SAMN54589076	ybt 16; ICEKp12	530-2LV	-	0	-	0	-	0	-	0	-	-	-	-	-	-	-	qnrS1	-	catA1^	-	sul1	tet(A).v1	-	dfrA1.v1	TEM-1D.v1^	-	SHV-11	35Q	OmpK35-72%	-	GyrA-83I;ParC-80I	KL2	K2	-	Typeable	99.84%	-	O1/O2v1	O1ab	-	Typeable
884668	2020-10-20	Georgia	Urine	ST405	no	no	SAMN54589302	ybt 27; ICEKp22	312-1LV	-	0	-	0	-	0	-	0	-	-	-	CTX-M-15	aac(3)-IIa.v1^;aac(6')-Ib-cr.v2;strA.v1^;strB.v1	-	-	qnrB1.v2^	-	-	-	sul2	tet(A).v1	-	dfrA14.v2*	OXA-1;TEM-1D.v1^	-	SHV-76	35Q	OmpK36_c25t	-	-	KL151	unknown (KL151)	-	Typeable	99.68%	-	O4	O4	?2	Typeable
1006093	2021-09-28	Georgia	Blood	ST395	no	no	SAMN54589506	ybt 16; ICEKp12 (truncated)	530-4LV	-	0	-	0	-	0	-	0	-	-	OXA-48	CTX-M-15	aac(6')-Ib-cr.v2;aph(3')-VIa*;armA	-	-	qnrS1	mphE.v2;msrE	catA1^	-	sul1	tet(A).v1	-	dfrA1.v1	OXA-1;TEM-1D.v1^	-	SHV-11	35Q	OmpK35-72%;OmpK36GD	MgrB-62%	GyrA-83I;ParC-80I	KL2	K2	?2	Typeable	99.84%	-	O1/O2v1	O1ab	?2	Typeable
861936	2020-01-08	Georgia	Urine	ST45	no	no	SAMN54589031	ybt 10; ICEKp4	78-1LV	-	0	-	0	-	0	-	0	-	-	-	-	-	-	-	-	-	-	-	-	-	-	-	-	-	SHV-1	-	-	-	-	KL62	Capsule null	!	Typeable	99.92%	-	O1/O2v1	O2a	-	Typeable
804250	2018-10-19	Georgia	Blood	ST3154	no	no	SAMN54588940	-	0	-	0	-	0	-	0	-	0	-	-	-	CTX-M-15	-	-	-	-	-	-	-	-	-	-	dfrA14.v2*	-	-	SHV-65	-	-	-	-	KL62	K62	?2	Typeable	99.82%	-	O1/O2v1	O1ab	-	Typeable
862296	2020-03-17	Georgia	Blood	ST502	no	no	SAMN54589067	-	0	-	0	-	0	-	0	-	0	-	-	-	-	-	-	-	qnrS1	-	-	-	-	-	-	-	-	-	SHV-62	35Q	-	-	-	KL15	K15	-	Typeable	99.92%	-	O4	O4	-	Typeable
908263	2021-01-11	Georgia	Surgical tissue	ST512	no	no	SAMN54589356	-	0	-	0	-	0	-	0	-	0	-	-	KPC-3	-	aadA2^;aph3-Ia.v1^	-	-	-	Mrx;mphA	catA1^	-	sul1	-	-	dfrA12	-	-	SHV-11	35Q	OmpK35-25%;OmpK36GD	MgrB-79%	GyrA-83I;ParC-80I	KL107	unknown (KL107)	-	Typeable	99.95%	-	O1/O2v2	O2afg	-	Typeable
908297	2021-01-11	Georgia	Fluid	ST512	no	no	SAMN54589359	-	0	-	0	-	0	-	0	-	0	-	-	KPC-3	-	-	-	-	-	-	-	-	-	-	-	-	-	-	SHV-11	35Q	OmpK35-25%;OmpK36GD	MgrB-79%	GyrA-83I;ParC-80I	KL107	unknown (KL107)	-	Typeable	99.95%	-	O1/O2v2	O2afg	-	Typeable
862326	2020-03-17	Georgia	Urine	ST502	no	no	SAMN54589070	-	0	-	0	-	0	-	0	-	0	-	-	KPC-2	-	-	-	-	qnrS1	-	-	-	-	-	-	-	-	-	SHV-62	35Q	-	-	-	KL15	K15	-	Typeable	99.92%	-	O4	O4	-	Typeable
908319	2021-01-11	Georgia	Urine	ST512	no	no	SAMN54589361	-	0	-	0	-	0	-	0	-	0	-	-	KPC-3	-	armA	-	-	-	mphE.v2;msrE	-	-	sul1	-	-	-	-	-	SHV-11	35Q	OmpK35-25%;OmpK36GD	MgrB-79%	GyrA-83I;ParC-80I	KL107	unknown (KL107)	-	Typeable	99.96%	-	OL13	O13	-	Untypeable
804330	2018-12-07	Georgia	Blood	ST35	no	no	SAMN54588948	ybt 14; ICEKp5	151-1LV	-	0	-	0	-	0	-	0	-	-	-	CTX-M-15	aac(3)-IId^;aph3-Ia.v1^;strA.v1^;strB.v1	-	-	-	-	-	-	sul2*	tet(D)	-	-	-	-	SHV-33	-	-	-	-	KL22	K22	-	Typeable	99.79%	-	O1/O2v1	O1ab	-	Typeable
908449	2021-02-09	Georgia	Urine	ST512	no	no	SAMN54589374	-	0	-	0	-	0	-	0	-	0	-	-	KPC-3	-	aadA2;aph3-Ia.v1^	-	-	-	Mrx;mphA	catA1^	-	sul1	-	-	dfrA12	-	-	SHV-11	35Q	OmpK35-25%;OmpK36GD	MgrB-79%	GyrA-83I;ParC-80I	KL107	unknown (KL107)	-	Typeable	99.96%	-	O1/O2v2	O2afg	-	Typeable
804322	2018-12-07	Georgia	Blood	ST35	no	no	SAMN54588947	ybt 14; ICEKp5	151-1LV	-	0	-	0	-	0	-	0	-	-	-	-	-	-	-	-	-	-	-	-	-	-	-	-	-	SHV-33	-	-	-	-	KL22	K22	-	Typeable	99.79%	-	O1/O2v1	O1ab	-	Typeable
804356	2018-12-21	Georgia	Blood	ST353	no	no	SAMN54588950	ybt 10; ICEKp4	377	-	0	-	0	-	0	-	0	-	-	-	CTX-M-15	-	-	-	qnrS1	-	-	-	-	-	-	-	TEM-1D.v1^	-	SHV-11^	35Q	-	-	-	KL110	unknown (KL110)	?3	Typeable	99.54%	-	O3b	O3b	?4	Typeable
908587	2021-03-09	Georgia	Urine	ST512	no	no	SAMN54589388	-	0	-	0	-	0	-	0	-	0	-	-	KPC-3	-	aadA2^;aph3-Ia.v1^	-	-	-	Mrx;mphA	catA1^	-	sul1	-	-	dfrA12	-	-	SHV-11	35Q	OmpK35-25%;OmpK36GD	MgrB-79%	GyrA-83I;ParC-80I	KL107	unknown (KL107)	-	Typeable	99.95%	-	O1/O2v2	O2afg	-	Typeable
862238	2020-03-10	Georgia	Respiratory	ST512	no	no	SAMN54589061	-	0	-	0	-	0	-	0	-	0	-	-	KPC-3	-	aadA2	-	-	-	-	-	-	sul1	-	-	-	-	-	SHV-11	35Q	OmpK35-25%;OmpK36GD	MgrB-79%	GyrA-83I;ParC-80I	KL107	unknown (KL107)	-	Typeable	99.99%	-	O1/O2v2	O2afg	-	Typeable
803756	2017-10-24	Georgia	Blood	ST11	no	no	SAMN54588890	ybt 15; ICEKp11	230	-	0	-	0	-	0	-	0	-	-	NDM-5	CTX-M-3	aadA16*;aadA2^;rmtB	-	-	-	-	-	-	sul1	-	-	dfrA12^;dfrA27	TEM-1D.v1^	-	SHV-11	35Q	OmpK35-0%	-	GyrA-83I;ParC-80I	KL27	K27	-	Typeable	100.00%	-	O1/O2v2	O2afg	-	Typeable
862246	2020-03-10	Georgia	Respiratory	ST512	no	no	SAMN54589062	-	0	-	0	-	0	-	0	-	0	-	-	KPC-3	-	aadA2	-	-	-	-	-	-	sul1	-	-	-	-	-	SHV-11	35Q	OmpK35-25%;OmpK36GD	MgrB-79%	GyrA-83I;ParC-80I	KL107	unknown (KL107)	-	Typeable	99.99%	-	O1/O2v2	O2afg	-	Typeable
908503	2021-02-23	Georgia	Blood	ST395	no	no	SAMN54589380	ybt 16; ICEKp12 (truncated)	530-4LV	-	0	-	0	-	0	-	0	-	-	OXA-48	-	aph(3')-VIa*;armA	-	-	-	mphE.v2;msrE	-	-	-	-	-	-	TEM-1D.v1^	-	SHV-11	35Q	OmpK35-72%;OmpK36GD	MgrB-62%	GyrA-83I;ParC-80I	KL2	K2	?2	Typeable	99.84%	-	O1/O2v1	O1ab	?2	Typeable
803802	2017-11-03	Georgia	Blood	ST307	no	no	SAMN54588895	ybt 10; ICEKp4	384	-	0	-	0	-	0	-	0	-	-	-	CTX-M-15	aac(3)-IIa.v1^;aac(6')-Ib-cr.v2;strA.v1^;strB.v1	-	-	-	-	-	-	sul2	-	-	dfrA14.v2*	OXA-1;TEM-1D.v1^	-	SHV-28^	-	OmpK35-21%	-	GyrA-83I;ParC-80I	KL102	unknown (KL102)	-	Typeable	99.66%	-	O1/O2v2	O2afg	-	Typeable
862270	2020-03-10	Georgia	Blood	ST512	no	no	SAMN54589065	-	0	-	0	-	0	-	0	-	0	-	-	KPC-3	-	aadA2;aph3-Ia.v1^	-	-	-	Mrx;mphA	catA1^	-	sul1	-	-	dfrA12	-	-	SHV-11	35Q	OmpK35-25%;OmpK36GD	MgrB-79%	GyrA-83I;ParC-80I	KL107	unknown (KL107)	-	Typeable	99.96%	-	O1/O2v2	O2afg	-	Typeable
862448	2020-04-21	Georgia	Respiratory	ST512	no	no	SAMN54589082	-	0	-	0	-	0	-	0	-	0	-	-	KPC-3	-	aadA2;aph3-Ia.v1^	-	-	-	Mrx;mphA	catA1^	-	sul1	-	-	dfrA12	-	-	SHV-11	35Q	OmpK35-25%;OmpK36GD	MgrB-79%	GyrA-83I;ParC-80I	KL107	unknown (KL107)	-	Typeable	99.96%	-	O1/O2v2	O2afg	-	Typeable
862498	2020-04-21	Georgia	Respiratory	ST512	no	no	SAMN54589087	-	0	-	0	-	0	-	0	-	0	-	-	KPC-3	-	aac(6')-Ib'.v1;aph3-Ia.v1^;armA	-	-	-	Mrx;mphA;mphE.v2;msrE	catA1^	-	sul1	-	-	dfrA12	-	-	SHV-11	35Q	OmpK35-25%;OmpK36GD	MgrB-79%	GyrA-83I;ParC-80I	KL107	unknown (KL107)	-	Typeable	99.96%	-	OL13	O13	-	Untypeable
884810	2020-07-14	Georgia	Respiratory	ST512	no	no	SAMN54589316	-	0	-	0	-	0	-	0	-	0	-	-	KPC-3	-	armA	-	-	-	mphE.v2;msrE	-	-	sul1	-	-	-	-	-	SHV-11	35Q	OmpK35-25%;OmpK36GD	MgrB-79%	GyrA-83I;ParC-80I	KL107	unknown (KL107)	-	Typeable	99.96%	-	OL13	O13	-	Untypeable
885016	2020-10-20	Georgia	Urine	ST512	no	no	SAMN54589336	-	0	-	0	-	0	-	0	-	0	-	-	KPC-3	-	aadA2^;aph3-Ia.v1^	-	-	-	Mrx;mphA	catA1^	-	sul1	-	-	dfrA12	-	-	SHV-11	35Q	OmpK35-25%;OmpK36GD	MgrB-79%	GyrA-83I;ParC-80I	KL107	unknown (KL107)	-	Typeable	99.95%	-	O1/O2v2	O2afg	-	Typeable
885024	2020-11-03	Georgia	Blood	ST512	no	no	SAMN54589337	-	0	-	0	-	0	-	0	-	0	-	-	KPC-3	-	aph3-Ia.v1^;armA	-	-	-	Mrx;mphA;mphE.v2;msrE	catA1^	-	sul1	-	-	dfrA12	-	-	SHV-11	35Q	OmpK35-25%;OmpK36GD	MgrB-79%	GyrA-83I;ParC-80I	KL107	unknown (KL107)	-	Typeable	99.96%	-	OL13	O13	-	Untypeable
908159	2020-12-01	Georgia	Urine	ST512	no	no	SAMN54589346	-	0	-	0	-	0	-	0	-	0	-	-	KPC-3	-	aph3-Ia.v1^;armA	-	-	-	Mrx;mphA;mphE.v2;msrE	catA1^	-	sul1	-	-	dfrA12	-	-	SHV-11	35Q	OmpK35-25%;OmpK36GD	MgrB-79%	GyrA-83I;ParC-80I	KL107	unknown (KL107)	-	Typeable	99.96%	-	OL13	O13	-	Untypeable
908167	2020-12-15	Georgia	Urine	ST512	no	no	SAMN54589347	-	0	-	0	-	0	-	0	-	0	-	-	KPC-3	-	aadA2^;aph3-Ia.v1^	-	-	-	Mrx;mphA	catA1^	-	sul1	-	-	dfrA12	-	-	SHV-11	35Q	OmpK35-25%;OmpK36GD	MgrB-79%	GyrA-83I;ParC-80I	KL107	unknown (KL107)	-	Typeable	99.95%	-	O1/O2v2	O2afg	-	Typeable
908175	2020-12-15	Georgia	Wound	ST512	no	no	SAMN54589348	-	0	-	0	-	0	-	0	-	0	-	-	KPC-3	-	aph3-Ia.v1^;armA	-	-	-	Mrx;mphA;mphE.v2;msrE	catA1^	-	sul1	-	-	dfrA12	-	-	SHV-11	35Q	OmpK35-25%;OmpK36GD	MgrB-79%	GyrA-83I;ParC-80I	KL107	unknown (KL107)	-	Typeable	99.96%	-	OL13	O13	-	Untypeable
861806	2019-12-10	Georgia	Respiratory	ST395	no	no	SAMN54589018	ybt 16; ICEKp12	530-2LV	-	0	-	0	-	0	-	0	-	-	OXA-48	CTX-M-15	aac(6')-Ib-cr.v2	-	-	qnrS1	-	catA1^	-	sul1	tet(A).v1	-	dfrA1.v1	OXA-1;TEM-1D.v1^	-	SHV-11	35Q	OmpK35-72%;OmpK36GD	PmrB-59%	GyrA-83I;ParC-80I	KL2	K2	-	Typeable	99.84%	-	O1/O2v1	O1ab	?2	Typeable
861864	2019-12-26	Georgia	Blood	ST395	no	no	SAMN54589024	ybt 16; ICEKp12	530-2LV	-	0	-	0	-	0	-	0	-	-	-	CTX-M-3	aac(6')-Ib-cr.v2	-	-	qnrS1	-	catA1^	-	-	-	-	-	OXA-1;TEM-1D.v1^	-	SHV-11	35Q	OmpK35-72%	-	GyrA-83I;ParC-80I	KL2	K2	!	Typeable	99.78%	-	O1/O2v1	O1ab	-	Typeable
861872	2019-12-26	Georgia	Urine	ST462	no	no	SAMN54589025	-	0	-	0	-	0	-	0	-	0	-	-	-	CTX-M-14	strA.v1^;strB.v1	-	-	-	-	-	-	sul1;sul2	tet(A).v1	-	dfrA1.v1	-	-	SHV-11^	35Q	-	-	-	KL149	Capsule null	!	Typeable	99.90%	-	O4	O4	-	Typeable
862350	2020-03-27	Georgia	Fluid	ST562	no	no	SAMN54589073	-	0	-	0	-	0	-	0	-	0	-	-	-	CTX-M-3	aac(3)-IIg;aac(6')-IIc;strA.v1;strB.v1	mcr-9.1	-	qnrB4	-	catII.2*	-	sul1	tet(D)	-	dfrA19*	DHA-1;TEM-1D.v1^	-	-	-	-	-	-	KL18	K18	-	Typeable	99.99%	-	O1/O2v1	O1ab	-	Typeable
862254	2020-03-10	Georgia	Respiratory	ST395	no	no	SAMN54589063	ybt 16; ICEKp12	530-2LV	-	0	-	0	-	0	-	0	-	-	OXA-48	CTX-M-15	aac(3)-IIa.v1^;aac(6')-Ib-cr.v2	-	-	qnrS1	-	catA1^	-	sul1	tet(A).v1	-	dfrA1.v1	OXA-1;TEM-1D.v1^	-	SHV-11	35Q	OmpK35-72%	-	GyrA-83I;ParC-80I	KL2	K2	-	Typeable	99.84%	-	O1/O2v1	O1ab	-	Typeable
803772	2017-11-03	Georgia	Urine	ST36	no	no	SAMN54588892	-	0	-	0	-	0	-	0	-	0	-	-	-	CTX-M-14	aac(3)-IId^;strA.v1^;strB.v1	-	-	qnrS1	-	catII.2*	-	sul1;sul2	tet(A).v1;tet(D)	-	dfrA1.v1	LAP-2;TEM-1D.v1^	-	SHV-11^	35Q	-	-	-	KL27	K27	-	Typeable	100.00%	-	O1/O2v2	O2afg	-	Typeable
803780	2017-11-03	Georgia	Urine	ST36	no	no	SAMN54588893	-	0	-	0	-	0	-	0	-	0	-	-	-	CTX-M-14	aac(3)-IId^;strA.v1^;strB.v1	-	-	qnrS1	-	catII.2*	-	sul1;sul2	tet(A).v1;tet(D)	-	dfrA1.v1	LAP-2;TEM-1D.v1^	-	SHV-11^	35Q	-	-	-	KL27	K27	-	Typeable	100.00%	-	O1/O2v2	O2afg	-	Typeable
808466	2017-11-03	Georgia	Urine	ST36	no	no	SAMN54588965	-	0	-	0	-	0	-	0	-	0	-	-	-	CTX-M-14	aac(3)-IId^;strA.v1^;strB.v1	-	-	qnrS1	-	catII.2*	-	sul1;sul2	tet(A).v1;tet(D)	-	dfrA1.v1	LAP-2;TEM-1D.v1^	-	SHV-11^	35Q	-	-	-	KL27	K27	-	Typeable	100.00%	-	O1/O2v2	O2afg	-	Typeable
803650	2017-09-01	Georgia	Blood	ST307	no	no	SAMN54588880	ybt 9; ICEKp3	187	-	0	-	0	-	0	-	0	-	-	OXA-48	CTX-M-15	aac(3)-IIa.v1^;aac(6')-Ib-cr.v2;strB.v1	-	-	-	-	-	-	sul2	-	-	dfrA14.v2*	OXA-1;TEM-1D.v1^	-	SHV-28^	-	-	-	GyrA-83I;ParC-80I	KL102	unknown (KL102)	-	Typeable	99.66%	-	O1/O2v2	O2afg	-	Typeable
803668	2017-10-02	Georgia	Blood	ST395	no	no	SAMN54588881	ybt 16; ICEKp12	530-2LV	-	0	-	0	-	0	-	0	-	-	OXA-48	CTX-M-15	aac(6')-Ib-cr.v2	-	-	qnrS1	-	catA1^	-	sul1	tet(A).v1	-	dfrA1.v1	OXA-1;TEM-1D.v1^	-	SHV-11	35Q	OmpK35-72%	-	GyrA-83I;ParC-80I	KL2	K2	-	Typeable	99.84%	-	O1/O2v1	O1ab	-	Typeable
803676	2017-10-02	Georgia	Blood	ST395	no	no	SAMN54588882	ybt 16; ICEKp12	530-2LV	-	0	-	0	-	0	-	0	-	-	OXA-48	CTX-M-15	aac(6')-Ib-cr.v2	-	-	qnrS1	-	catA1^	-	sul1	tet(A).v1	-	dfrA1.v1	OXA-1;TEM-1D.v1^	-	SHV-11	35Q	OmpK35-72%	-	GyrA-83I;ParC-80I	KL2	K2	-	Typeable	99.84%	-	O1/O2v1	O1ab	-	Typeable
803684	2017-10-02	Georgia	Blood	ST395	no	no	SAMN54588883	ybt 16; ICEKp12	530-2LV	-	0	-	0	-	0	-	0	-	-	OXA-48	CTX-M-15	aac(6')-Ib-cr.v2	-	-	qnrS1	-	catA1^	-	sul1	tet(A).v1	-	dfrA1.v1	OXA-1;TEM-1D.v1^	-	SHV-11	35Q	OmpK35-72%	-	GyrA-83I;ParC-80I	KL2	K2	-	Typeable	99.84%	-	O1/O2v1	O1ab	-	Typeable
803692	2017-10-02	Georgia	Blood	ST395	no	no	SAMN54588884	ybt 16; ICEKp12	530-2LV	-	0	-	0	-	0	-	0	-	-	OXA-48	CTX-M-15	aac(6')-Ib-cr.v2	-	-	qnrS1	-	catA1^	-	sul1	tet(A).v1	-	dfrA1.v1	OXA-1;TEM-1D.v1^	-	SHV-11	35Q	OmpK35-72%	-	GyrA-83I;ParC-80I	KL2	K2	-	Typeable	99.84%	-	O1/O2v1	O1ab	-	Typeable
803706	2017-10-10	Georgia	Urine	ST395	no	no	SAMN54588885	ybt 16; ICEKp12	530-2LV	-	0	-	0	-	0	-	0	-	-	OXA-48	CTX-M-15	aac(6')-Ib-cr.v2	-	-	qnrS1	-	catA1^	-	sul1	tet(A).v1	-	dfrA1.v1	OXA-1;TEM-1D.v1^	-	SHV-11	35Q	OmpK35-72%	-	GyrA-83I;ParC-80I	KL2	K2	-	Typeable	99.84%	-	O1/O2v1	O1ab	!	Typeable
803810	2017-12-21	Georgia	Blood	ST395	no	no	SAMN54588896	ybt 16; ICEKp12	530-2LV	-	0	-	0	-	0	-	0	-	-	OXA-48	CTX-M-15	aac(6')-Ib-cr.v2	-	-	qnrS1	-	catA1^	-	sul1	tet(A).v1	-	dfrA1.v1	OXA-1;TEM-1D.v1^	-	SHV-11	35Q	OmpK35-72%	-	GyrA-83I;ParC-80I	KL2	K2	-	Typeable	99.84%	-	O1/O2v1	O1ab	-	Typeable
803828	2017-12-21	Georgia	Blood	ST395	no	no	SAMN54588897	ybt 16; ICEKp12	530-2LV	-	0	-	0	-	0	-	0	-	-	-	CTX-M-15	aac(3)-IIa.v1^;aac(6')-Ib-cr.v2;armA	-	-	qnrS1	mphE.v2;msrE	catA1^	-	sul1	tet(A).v1	-	dfrA1.v1	OXA-1;TEM-1D.v1^	-	SHV-11	35Q	OmpK35-72%	-	GyrA-83I;ParC-80I	KL2	K2	-	Typeable	99.84%	-	O1/O2v1	O1ab	-	Typeable
803836	2017-12-21	Georgia	Blood	ST395	no	no	SAMN54588898	ybt 16; ICEKp12	530-2LV	-	0	-	0	-	0	-	0	-	-	-	CTX-M-15	aac(3)-IIa.v1^;aac(6')-Ib-cr.v2;armA	-	-	qnrS1	mphE.v2;msrE	catA1^	-	sul1	tet(A).v1	-	dfrA1.v1	OXA-1;TEM-1D.v1^	-	SHV-11	35Q	OmpK35-72%	-	GyrA-83I;ParC-80I	KL2	K2	-	Typeable	99.84%	-	O1/O2v1	O1ab	-	Typeable
803982	2018-03-09	Georgia	Blood	ST395	no	no	SAMN54588913	ybt 16; ICEKp12	530-2LV	-	0	-	0	-	0	-	0	-	-	-	CTX-M-15	aac(6')-Ib-cr.v2;armA	-	-	qnrS1	mphE.v2;msrE	catA1^	-	sul1	tet(A).v1	-	dfrA1.v1	OXA-1;TEM-1D.v1^	-	SHV-11	35Q	OmpK35-72%	MgrB-70%	GyrA-83I;ParC-80I	KL2	K2	-	Typeable	99.84%	-	O1/O2v1	O1ab	-	Typeable
804016	2018-04-19	Georgia	Urine	ST395	no	no	SAMN54588916	ybt 16; ICEKp12	530-2LV	-	0	-	0	-	0	-	0	-	-	-	CTX-M-15	aac(6')-Ib-cr.v2;armA	-	-	qnrS1	mphE.v2;msrE	catA1^	-	sul1	tet(A).v1	-	dfrA1.v1	OXA-1;TEM-1D.v1^	-	SHV-11	35Q	OmpK35-72%	-	GyrA-83I;ParC-80I	KL2	K2	-	Typeable	99.84%	-	O1/O2v1	O1ab	-	Typeable
804196	2018-10-10	Georgia	Urine	ST395	no	no	SAMN54588934	ybt 16; ICEKp12	530-2LV	-	0	-	0	-	0	-	0	-	-	-	CTX-M-15	aac(6')-Ib-cr.v2	-	-	-	-	catA1^	-	sul1	tet(A).v1	-	dfrA1.v1	OXA-1;TEM-1D.v1^	-	SHV-11	35Q	OmpK35-72%	-	GyrA-83I;ParC-80I	KL2	K2	-	Typeable	99.83%	-	O1/O2v1	O1ab	?2	Typeable
1004739	2018-11-30	Georgia	Respiratory	ST395	no	no	SAMN54589467	ybt 16; ICEKp12	530-2LV	-	0	-	0	-	0	-	0	-	-	-	CTX-M-15	aac(3)-IIa.v1^;aac(6')-Ib-cr.v2	-	-	qnrS1	-	catA1^	-	sul1	tet(A).v1	-	dfrA1.v1	OXA-1;TEM-1D.v1^	-	SHV-11	35Q	OmpK35-72%	-	GyrA-83I;ParC-80I	KL2	K2	-	Typeable	99.84%	-	O1/O2v1	O1ab	-	Typeable
804372	2019-01-25	Georgia	Urine	ST462	no	no	SAMN54588952	-	0	-	0	-	0	-	0	-	0	-	-	-	-	-	-	-	qnrS1	-	-	-	sul1	tet(A).v1	-	dfrA1.v1	LAP-2	-	SHV-11^	35Q	-	-	-	KL9	K9	-	Typeable	99.74%	-	O1/O2v2	O2afg	-	Typeable
884924	2020-09-22	Georgia	Blood	ST395	no	no	SAMN54589327	ybt 16; ICEKp12	530-2LV	-	0	-	0	-	0	-	0	-	-	OXA-48	CTX-M-15	aac(6')-Ib-cr.v2	-	-	qnrS1	-	catA1^	-	sul1	tet(A).v1	-	dfrA1.v1	OXA-1;TEM-1D.v1^	-	SHV-11	35Q	OmpK35-72%	-	GyrA-83I;ParC-80I	KL2	K2	-	Typeable	99.84%	-	O1/O2v1	O1ab	-	Typeable
884940	2020-09-22	Georgia	Blood	ST395	no	no	SAMN54589329	ybt 16; ICEKp12	530-2LV	-	0	-	0	-	0	-	0	-	-	OXA-48	CTX-M-15	aac(3)-IIa.v1^;aac(6')-Ib-cr.v2	-	-	qnrS1	-	catA1^	-	sul1	tet(A).v1	-	dfrA1.v1	OXA-1;TEM-1D.v1^	-	SHV-11	35Q	OmpK35-72%	-	GyrA-83I;ParC-80I	KL2	K2	-	Typeable	99.84%	-	O1/O2v1	O1ab	-	Typeable
804112	2018-07-20	Georgia	Urine	ST45	no	no	SAMN54588926	ybt 10; ICEKp4	78-1LV	-	0	-	0	-	0	-	0	-	-	-	CTX-M-15	aph3-Ia.v1*;strA.v1^;strB.v1	-	-	-	-	catA1^	-	sul2	tet(D)	-	dfrA14.v2*	TEM-1D.v1^	-	SHV-1	-	-	-	-	KL62	K62	-	Typeable	99.93%	-	O1/O2v1	O2a	-	Typeable
804268	2018-10-19	Georgia	Blood	ST15	no	no	SAMN54588941	ybt 16; ICEKp12	448-3LV	-	0	-	0	-	0	-	0	-	-	OXA-48	-	aac(6')-Ib-cr.v2;aadA16*;strA.v1*;strB.v1*	-	-	qnrB6^	-	-	arr-3	sul1;sul2	-	-	dfrA27	TEM-1D.v1^	-	SHV-28^	-	OmpK35-49%;OmpK36GD	-	GyrA-83F;GyrA-87A;ParC-80I	KL19	K19	-	Typeable	98.04%	-	O1/O2v2	O1ab	?2	Typeable
804276	2018-10-19	Georgia	Blood	ST15	no	no	SAMN54588942	ybt 16; ICEKp12	448-3LV	-	0	-	0	-	0	-	0	-	-	OXA-48	-	strA.v1*;strB.v1*	-	-	qnrB6^	-	-	arr-3	sul1;sul2	-	-	dfrA27	TEM-1D.v1^	-	SHV-28^	-	OmpK35-49%;OmpK36GD	-	GyrA-83F;GyrA-87A;ParC-80I	KL19	K19	?2	Typeable	98.12%	-	O1/O2v2	O1ab	?2	Typeable
804146	2018-08-31	Georgia	Urine	ST395	no	no	SAMN54588929	ybt 16; ICEKp12	530-2LV	-	0	-	0	-	0	-	0	-	-	OXA-48	-	aac(6')-Ib-cr.v2	-	-	-	-	catA1^	-	sul1	tet(A).v1	-	dfrA1.v1	OXA-1	-	SHV-11	35Q	OmpK35-72%;OmpK36GD;OmpK36_c25t	-	GyrA-83I;ParC-80I	KL2	K2	!	Typeable	99.85%	-	O1/O2v1	O1ab	-	Typeable
804058	2018-06-04	Georgia	Urine	ST395	no	no	SAMN54588920	ybt 16; ICEKp12	530-2LV	-	0	-	0	-	0	-	0	-	-	OXA-48	CTX-M-15	aadA5;armA	-	-	qnrS1	mphE.v2;msrE*	catA1^	-	sul1	-	-	dfrA17	TEM-1D.v1^	-	SHV-1^	-	OmpK35-72%;OmpK36_c25t	-	GyrA-83I;ParC-80I	KL2	K2	?2	Typeable	99.84%	-	O1/O2v1	O1ab	?2!	Typeable
804218	2018-10-19	Georgia	Blood	ST395	no	no	SAMN54588936	ybt 16; ICEKp12	530-2LV	-	0	-	0	-	0	-	0	-	-	OXA-48	CTX-M-15	aadA5;armA	-	-	qnrS1	mphE.v2;msrE*	catA1^	-	sul1	-	-	dfrA17	TEM-1D.v1^	-	SHV-1^	-	OmpK35-72%;OmpK36_c25t	-	GyrA-83I;ParC-80I	KL2	K2	?2	Typeable	99.83%	-	O1/O2v1	O1ab	?2!	Typeable
803990	2018-04-05	Georgia	Blood	ST395	no	no	SAMN54588914	ybt 16; ICEKp12	530-2LV	-	0	-	0	-	0	-	0	-	-	NDM-5	CTX-M-15	aac(3)-IIa.v1^;aac(6')-Ib-cr.v2;armA;rmtB	-	-	qnrS1	mphE.v2;msrE	catA1^	-	sul1	tet(A).v1	-	dfrA1.v1;dfrA12	OXA-1;TEM-1D.v1^	-	SHV-11	35Q	OmpK35-72%	-	GyrA-83I;ParC-80I	KL2	K2	-	Typeable	99.84%	-	O1/O2v1	O1ab	-	Typeable
804008	2018-04-13	Georgia	Blood	ST395	no	no	SAMN54588915	ybt 16; ICEKp12	530-2LV	-	0	-	0	-	0	-	0	-	-	NDM-5	CTX-M-15	aac(3)-IIa.v1^;aac(6')-Ib-cr.v2;armA;rmtB	-	-	qnrS1	mphE.v2;msrE	catA1^	-	sul1	tet(A).v1	-	dfrA1.v1;dfrA12	OXA-1;TEM-1D.v1^	-	SHV-11	35Q	OmpK35-72%	-	GyrA-83I;ParC-80I	KL2	K2	-	Typeable	99.84%	-	O1/O2v1	O1ab	-	Typeable
804428	2019-02-14	Georgia	Blood	ST512	no	no	SAMN54588957	-	0	-	0	-	0	-	0	-	0	-	-	KPC-3	-	aadA2^	-	-	-	Mrx;mphA	catA1^	-	sul1	-	-	dfrA12	-	-	SHV-11	35Q	OmpK35-25%;OmpK36GD	MgrB-79%	GyrA-83I;ParC-80I	KL107	unknown (KL107)	-	Typeable	99.96%	-	O1/O2v2	O2afg	-	Typeable
804032	2018-05-11	Georgia	Blood	ST397	no	no	SAMN54588918	ybt 4; plasmid	31-1LV	-	0	-	0	-	0	-	0	-	-	NDM-5	CTX-M-3	aadA2^;rmtB	-	-	-	-	-	-	sul1	-	-	dfrA12	TEM-1D.v1^	-	SHV-1^	-	-	-	-	KL158	unknown (KL158)	-	Typeable	99.93%	-	O1/O2v1	O1ab	-	Typeable
804066	2018-06-14	Georgia	Blood	ST397	no	no	SAMN54588921	ybt 4; plasmid	31-2LV	-	0	-	0	-	0	-	0	-	-	NDM-5	CTX-M-3	aadA2^;rmtB	-	-	-	-	-	-	sul1	-	-	dfrA12	TEM-1D.v1^	-	SHV-1^	-	-	-	-	KL158	unknown (KL158)	-	Typeable	99.93%	-	O1/O2v1	O1ab	-	Typeable
804138	2018-08-31	Georgia	Urine	ST512	no	no	SAMN54588928	-	0	-	0	-	0	-	0	-	0	-	-	KPC-3	-	armA	-	-	-	mphE.v2	-	-	sul1	-	-	-	-	-	SHV-11	35Q	OmpK35-25%;OmpK36GD	MgrB-79%	GyrA-83I;ParC-80I	KL107	unknown (KL107)	!	Typeable	99.98%	-	O1/O2v2	O2afg	-	Typeable
803924	2018-01-25	Georgia	Blood	ST557	no	no	SAMN54588907	-	0	-	0	-	0	-	0	-	0	-	-	NDM-5	CTX-M-15	aac(3)-IIa.v1;aadA2^;aph(3')-VIa*;rmtB;strA.v1;strB.v1	-	-	-	-	catA1^	-	sul1;sul2	-	-	dfrA1.v1;dfrA12^;dfrA14.v2*	TEM-1D.v1^	-	SHV-1^	-	-	-	-	KL116	unknown (KL116)	-	Typeable	99.64%	-	O1/O2v1	O1ab	-	Typeable
803932	2018-02-20	Georgia	Blood	ST557	no	no	SAMN54588908	-	0	-	0	-	0	-	0	-	0	-	-	-	CTX-M-15	aac(3)-IIa.v1;aph(3')-VIa*;strA.v1;strB.v1	-	-	-	-	catA1^	-	sul1;sul2	-	-	dfrA1.v1;dfrA14.v2*	TEM-1D.v1^	-	SHV-1^	-	-	-	-	KL116	unknown (KL116)	-	Typeable	99.64%	-	O1/O2v1	O1ab	-	Typeable
803764	2017-11-03	Georgia	Blood	ST557	no	no	SAMN54588891	-	0	-	0	-	0	-	0	-	0	-	-	-	CTX-M-15	aac(3)-IIa.v1;aph(3')-VIa*;strA.v1;strB.v1	-	-	-	-	catA1^	-	sul1;sul2	-	-	dfrA1.v1;dfrA14.v2*	TEM-1D.v1^	-	SHV-1^	-	-	-	-	KL116	unknown (KL116)	-	Typeable	99.64%	-	O1/O2v1	O1ab	-	Typeable
803798	2017-11-03	Georgia	Urine	ST557	no	no	SAMN54588894	-	0	-	0	-	0	-	0	-	0	-	-	-	CTX-M-15	aac(3)-IIa.v1;aph(3')-VIa*;strA.v1;strB.v1	-	-	-	-	catA1^	-	sul1;sul2	-	-	dfrA1.v1;dfrA14.v2*	TEM-1D.v1^	-	SHV-1^	-	-	-	-	KL116	unknown (KL116)	-	Typeable	99.64%	-	O1/O2v1	O1ab	-	Typeable
908191	2020-12-15	Georgia	Blood	ST395	no	no	SAMN54589350	ybt 16; ICEKp12	530-2LV	-	0	-	0	-	0	-	0	-	-	OXA-48	CTX-M-15	aac(3)-IIa.v1^;aac(6')-Ib-cr.v2	-	-	qnrS1	-	catA1^	-	sul1	tet(A).v1	-	dfrA1.v1	OXA-1;TEM-1D.v1^	-	SHV-11	35Q	OmpK35-72%	-	GyrA-83I;ParC-80I	KL2	K2	?2	Typeable	99.83%	-	O1/O2v1	O1ab	-	Typeable
908213	2020-12-15	Georgia	Respiratory	ST395	no	no	SAMN54589352	ybt 16; ICEKp12	530-2LV	-	0	-	0	-	0	-	0	-	-	OXA-48	CTX-M-15	aac(3)-IIa.v1^;aac(6')-Ib-cr.v2	-	-	qnrS1	-	catA1^	-	sul1	tet(A).v1	-	dfrA1.v1	OXA-1;TEM-1D.v1^	-	SHV-11	35Q	OmpK35-72%	-	GyrA-83I;ParC-80I	KL2	K2	?2	Typeable	99.83%	-	O1/O2v1	O1ab	-	Typeable
862624	2020-05-19	Georgia	Blood	ST610	no	no	SAMN54589100	ybt 9; ICEKp3	209-1LV	-	0	-	0	-	0	-	0	-	-	-	CTX-M-3	aadA15*	-	-	-	-	-	-	sul1	-	-	-	OXA-1;TEM-1D.v1^	-	SHV-11^	35Q	-	-	-	KL55	K55	-	Typeable	98.83%	-	O3/O3a	O3/O3a	-	Typeable
804234	2018-10-19	Georgia	Blood	ST627	no	no	SAMN54588938	ybt 16; ICEKp12	448-1LV	-	0	-	0	-	0	-	0	-	-	-	CTX-M-14	aac(3)-IId^	-	-	qnrS1	-	-	-	sul1	tet(A).v1	-	dfrA1.v1	LAP-2	-	SHV-115	240K	-	-	-	KL24	K24	-	Typeable	99.96%	-	O1/O2v1	O1ab	-	Typeable
804242	2018-10-19	Georgia	Blood	ST627	no	no	SAMN54588939	ybt 16; ICEKp12	448-1LV	-	0	-	0	-	0	-	0	-	-	-	CTX-M-14	aac(3)-IId^;strA.v1^;strB.v1	-	-	qnrS1	-	catII.2*	-	sul1;sul2	tet(A).v1;tet(D)	-	dfrA1.v1	LAP-2	-	SHV-115	240K	-	-	-	KL24	K24	-	Typeable	99.96%	-	O1/O2v1	O1ab	-	Typeable
804292	2018-10-19	Georgia	Blood	ST627	no	no	SAMN54588944	ybt 16; ICEKp12	448-1LV	-	0	-	0	-	0	-	0	-	-	-	CTX-M-14	aac(3)-IId^;strA.v1^;strB.v1	-	-	qnrS1	-	catII.2*	-	sul1;sul2	tet(A).v1;tet(D)	-	dfrA1.v1	LAP-2	-	SHV-115	240K	-	-	-	KL24	K24	-	Typeable	99.96%	-	O1/O2v1	O1ab	-	Typeable
804188	2018-10-09	Georgia	Blood	ST627	no	no	SAMN54588933	ybt 16; ICEKp12	448-1LV	-	0	-	0	-	0	-	0	-	-	-	-	strA.v1^;strB.v1	-	-	-	-	-	-	sul1;sul2	tet(A).v1	-	dfrA1.v1	-	-	SHV-115	240K	-	-	-	KL24	K24	-	Typeable	99.96%	-	O1/O2v1	O1ab	-	Typeable
1005049	2019-05-16	Georgia	Urine	ST873	no	no	SAMN54589477	-	0	-	0	-	0	-	0	-	0	-	-	-	-	-	-	-	-	-	-	-	-	-	-	-	-	-	SHV-27^	156D	-	-	-	KL52	K52	?3	Typeable	99.92%	-	OL13	O13	?4!	Typeable
1004915	2019-03-01	Georgia	Respiratory	ST889	no	no	SAMN54589476	ybt 14; ICEKp5	151	-	0	-	0	-	0	-	0	-	-	-	-	-	-	-	-	-	-	-	-	-	-	-	-	-	SHV-108^	35Q	-	-	-	KL54	K54	-	Typeable	99.80%	-	O1/O2v1	O1ab	-	Typeable
503163	2014-02-19	Jordan	Unknown	ST152	no	no	SAMN54588269	-	0	-	0	-	0	-	0	-	0	-	-	-	CTX-M-15	aac(6')-Ib-cr.v2;aadA2^;aph3-Ia.v1^	-	-	-	-	-	-	sul1	-	-	dfrA12	OXA-1;TEM-1D.v1^	-	SHV-1^	-	-	-	-	KL149	unknown (KL149)	-	Typeable	99.99%	-	O4	O4	-	Typeable
503756	2014-02-24	Jordan	Unknown	ST405	no	no	SAMN54588270	ybt 27; ICEKp22	312-1LV	-	0	-	0	-	0	-	0	-	-	-	CTX-M-15	aac(6')-Ib-cr.v2;strA.v1^;strB.v1	-	-	qnrB1.v2^	-	-	-	sul2	tet(A).v1	-	dfrA14.v2*	OXA-1;TEM-1D.v1^	-	SHV-76	35Q	-	-	-	KL151	unknown (KL151)	-	Typeable	99.68%	-	O4	O4	-	Typeable
505107	2016-05-04	Jordan	Unknown	ST592	yes	yes	SAMN54588271	-	0	-	0	iuc 1	5	iro 1	1	rmp 1; KpVP-1 (truncated)	26-1LV	rmpA2_5-54%	peg-344	-	-	-	-	-	-	-	-	-	-	-	-	-	-	-		164H;omega-loop=HWETELNEALPGDARD	-	-	-	KL57	K57	?4	Typeable	99.93%	-	O3b	O3b	?2	Typeable
505727	2014-02-19	Jordan	Unknown	ST1686	no	no	SAMN54588272	-	0	-	0	-	0	-	0	-	0	-	-	-	-	-	-	-	-	-	-	-	-	-	-	-	-	-	SHV-171	-	-	-	-	KL113	unknown (KL113)	-	Typeable	98.60%	-	O1/O2v1	O1ab	-	Typeable
505736	2014-02-19	Jordan	Unknown	ST1686	no	no	SAMN54588273	-	0	-	0	-	0	-	0	-	0	-	-	-	-	-	-	-	-	-	-	-	-	-	-	-	-	-	SHV-171	-	-	-	-	KL113	unknown (KL113)	-	Typeable	98.60%	-	O1/O2v1	O1ab	-	Typeable
510330	2014-02-19	Jordan	Unknown	ST1480	no	no	SAMN54588274	ybt 4; plasmid	65	-	0	-	0	-	0	-	0	-	-	-	-	-	-	-	-	-	-	-	-	-	-	-	-	-	SHV-11^	35Q	-	-	-	KL39	K39	?6	Typeable	98.64%	-	O3b	O3b	?6	Typeable
510428	2014-02-19	Jordan	Unknown	ST29	no	no	SAMN54588275	ybt 13; ICEKp2	500	-	0	-	0	-	0	-	0	-	-	-	-	-	-	-	-	-	-	-	-	-	-	-	-	-	SHV-187	-	-	-	-	KL54	K54	-	Typeable	99.95%	-	O1/O2v2	O1ab	-	Typeable
510525	2014-02-19	Jordan	Unknown	ST14	no	no	SAMN54588276	-	0	-	0	-	0	-	0	-	0	-	-	-	CTX-M-15	aac(3)-IIa.v1^;aac(6')-Ib-cr.v2	-	-	qnrB1.v2^	-	-	-	-	tet(A).v1	-	dfrA14.v2*	OXA-1	-	SHV-28^	-	-	-	-	KL2	K2	?2+	Typeable	99.82%	-	O1/O2v1	O1ab	-	Typeable
510561	2014-02-19	Jordan	Unknown	ST14	no	no	SAMN54588277	-	0	-	0	-	0	-	0	-	0	-	-	-	CTX-M-15	aac(3)-IIa.v1^;aac(6')-Ib-cr.v2	-	-	qnrB1.v2^	-	-	-	-	tet(A).v1	-	dfrA14.v2*	OXA-1	-	SHV-28^	-	-	-	-	KL2	K2	-	Typeable	99.82%	-	O1/O2v1	O1ab	-	Typeable
510570	2014-02-19	Jordan	Unknown	ST14	no	no	SAMN54588278	-	0	-	0	-	0	-	0	-	0	-	-	-	-	strA.v1*;strB.v1*	-	-	qnrB1.v2^	-	catII.2*	-	sul2	-	-	dfrA14.v2*	TEM-1D.v1^	-	SHV-28	-	-	-	-	KL2	K2	-	Typeable	99.84%	-	O1/O2v1	O1ab	-	Typeable
510589	2014-02-19	Jordan	Unknown	ST45	no	no	SAMN54588279	ybt 10; ICEKp4	78	-	0	-	0	-	0	-	0	-	-	-	CTX-M-15	aac(3)-IIa.v1^;aac(6')-Ib-cr.v2;strA.v1^;strB.v1	-	-	qnrB1.v2^	-	-	-	sul2	tet(A).v1	-	dfrA14.v2*	OXA-1;TEM-1D.v1^	-	SHV-1	-	-	-	-	KL62	K62	-	Typeable	99.97%	-	O1/O2v1	O2a	-	Typeable
510604	2014-02-19	Jordan	Unknown	ST420	no	no	SAMN54588280	ybt 10; ICEKp4	80	-	0	-	0	-	0	-	0	-	-	-	CTX-M-15	aac(3)-IIa.v1^;aac(6')-Ib-cr.v2;strA.v1^;strB.v1	-	-	-	-	-	-	sul2^	-	-	dfrA14.v2*	OXA-1;TEM-1D.v1^	-	SHV-75	-	-	-	-	KL20	K20	-	Typeable	99.96%	-	O1/O2v1	O1ab	-	Typeable
510613	2014-02-19	Jordan	Unknown	ST307	no	no	SAMN54588281	-	0	-	0	-	0	-	0	-	0	-	-	-	CTX-M-15	aac(3)-IIa.v1^;aac(6')-Ib-cr.v2;strA.v1^;strB.v1	-	-	qnrB1.v2^	-	-	-	sul2	tet(A).v1	-	dfrA14.v2*	OXA-1;TEM-1D.v1^	-	SHV-28^	-	-	-	GyrA-83I;ParC-80I	KL102	unknown (KL102)	-	Typeable	99.66%	-	O1/O2v2	O2afg	-	Typeable
510622	2014-02-19	Jordan	Unknown	ST77-2LV	no	no	SAMN54588282	ybt 4; plasmid	375	-	0	-	0	-	0	-	0	-	-	-	-	-	-	-	-	-	-	-	-	-	-	-	-	-	SHV-27	156D	-	-	-	KL116	unknown (KL116)	-	Typeable	99.84%	-	O1/O2v1	O2a	-	Typeable
510710	2014-02-19	Jordan	Unknown	ST45	no	no	SAMN54588283	ybt 10; ICEKp4	78-1LV	-	0	-	0	-	0	-	0	-	-	-	CTX-M-15	aac(3)-IIa.v1^;aadA*	-	-	-	-	-	-	-	tet(D)	-	dfrA14.v2*	OXA-9.v1	-	SHV-1	-	-	-	-	KL62	K62	-	Typeable	99.97%	-	O1/O2v1	O2a	-	Typeable
510738	2014-02-19	Jordan	Unknown	ST45	no	no	SAMN54588284	ybt 10; ICEKp4	78-1LV	-	0	-	0	-	0	-	0	-	-	-	CTX-M-15	aac(3)-IIa.v1^;aadA*	-	-	-	-	-	-	-	tet(D)	-	dfrA14.v2*	OXA-9.v1	-	SHV-1	-	-	-	-	KL62	K62	-	Typeable	99.97%	-	O1/O2v1	O2a	-	Typeable
510747	2014-02-19	Jordan	Unknown	ST45	no	no	SAMN54588285	ybt 10; ICEKp4	78-1LV	-	0	-	0	-	0	-	0	-	-	-	CTX-M-15	aac(3)-IIa.v1^;aadA*	-	-	-	-	-	-	-	tet(D)	-	dfrA14.v2*	OXA-9.v1	-	SHV-1	-	-	-	-	KL62	K62	-	Typeable	99.97%	-	O1/O2v1	O2a	-	Typeable
510756	2014-02-19	Jordan	Unknown	ST45	no	no	SAMN54588286	ybt 10; ICEKp4	78-1LV	-	0	-	0	-	0	-	0	-	-	OXA-48	CTX-M-15	aac(3)-IIa.v1^;aadA*	-	-	-	-	-	-	-	tet(D)	-	dfrA14.v2*	OXA-9.v1	-	SHV-1	-	-	-	-	KL62	K62	-	Typeable	99.97%	-	O1/O2v1	O2a	-	Typeable
510765	2014-02-19	Jordan	Unknown	ST391	no	no	SAMN54588287	-	0	-	0	-	0	-	0	-	0	-	-	-	CTX-M-15	aac(3)-IId^;aadA2;strA.v1*;strB.v1*	-	-	qnrB1.v1	-	cmlA4*	-	sul1;sul2	tet(D)^	-	dfrA14.v2*;dfrA15.v2*	TEM-1D.v1^	-	SHV-11^	35Q	-	-	-	KL30	K30	-	Typeable	97.45%	-	O1/O2v2	O1ab	-	Typeable
510783	2014-02-19	Jordan	Unknown	ST420	no	no	SAMN54588288	ybt 10; ICEKp4	80	-	0	-	0	-	0	-	0	-	-	-	CTX-M-15	aac(3)-IIa.v1^;aac(6')-Ib-cr.v2;strA.v1^;strB.v1	-	-	-	-	-	-	-	-	-	dfrA14.v2*	OXA-1;TEM-1D.v1^	-	SHV-75	-	-	-	-	KL20	K20	-	Typeable	99.96%	-	O1/O2v1	O1ab	-	Typeable
510792	2014-02-19	Jordan	Unknown	ST45	no	no	SAMN54588289	ybt 10; ICEKp4	78-1LV	-	0	-	0	-	0	-	0	-	-	-	CTX-M-15	aac(3)-IIa.v1^;aadA*	-	-	-	-	-	-	-	tet(D)	-	dfrA14.v2*	OXA-9.v1	-	SHV-1	-	-	-	-	KL62	K62	-	Typeable	99.97%	-	O1/O2v1	O2a	?2	Typeable
510914	2014-02-19	Jordan	Unknown	ST14	no	no	SAMN54588290	-	0	-	0	-	0	-	0	-	0	-	-	VIM-4	CTX-M-15	aac(3)-IIa.v1^;aac(6')-Ib-cr.v2;aac(6')-Il;ant(2'')-Ia;strA.v1;strB.v1	mcr-9.1	-	qnrB1.v2^	-	-	-	-	-	-	dfrA1.v2;dfrA14.v2*	OXA-1	-	SHV-28^	-	-	-	-	KL2	K2	-	Typeable	99.84%	-	O1/O2v1	O1ab	-	Typeable
511065	2014-02-19	Jordan	Unknown	ST14	no	no	SAMN54588291	-	0	-	0	-	0	-	0	-	0	-	-	-	CTX-M-15	aac(6')-Ib-cr.v2;strA.v1;strB.v1	-	-	qnrB1.v2^	-	-	-	-	-	-	dfrA14.v2*	OXA-1	-	SHV-28^	-	-	-	-	KL2	K2	!	Typeable	99.82%	-	O1/O2v1	O1ab	-	Typeable
511074	2014-02-19	Jordan	Unknown	ST29	no	no	SAMN54588292	ybt 14; ICEKp5	151	-	0	-	0	-	0	-	0	-	-	-	CTX-M-15	aac(3)-IIa.v1^;aac(6')-Ib-cr.v2;strA.v1^;strB.v1	-	-	qnrB1.v2^	-	-	-	sul2	tet(A).v1	-	dfrA14.v2*	OXA-1;TEM-1D.v1^	-	SHV-187	-	-	-	-	KL19	K19	-	Typeable	98.03%	-	O1/O2v2	O1ab	-	Typeable
511092	2014-02-19	Jordan	Unknown	ST14	yes	yes	SAMN54588293	ybt 10; ICEKp4	107	-	0	iuc 5	62-2LV	-	0	-	0	-	-	-	CTX-M-15	aadA5;strA.v1^;strB.v1	-	fosA3	qnrB1.v2^	-	-	-	sul1;sul2	tet(A).v1	-	dfrA14.v2*;dfrA17	-	-	SHV-100	-	-	-	-	KL16	K16	-	Typeable	99.74%	-	O1/O2v1	O1ab	-	Typeable
511144	2014-02-19	Jordan	Unknown	ST14	no	no	SAMN54588294	ybt 14; ICEKp5	442-1LV	-	0	-	0	-	0	-	0	-	-	-	CTX-M-15	strA.v1;strB.v1	-	-	-	-	-	-	-	-	-	dfrA14.v2*	-	-	SHV-28^	-	-	-	-	KL2	K2	-	Typeable	99.84%	-	O1/O2v1	O1ab	-	Typeable
511171	2014-02-19	Jordan	Unknown	ST14	no	no	SAMN54588295	ybt 14; ICEKp5	442-1LV	-	0	-	0	-	0	-	0	-	-	-	CTX-M-15	strA.v1;strB.v1	-	-	-	-	-	-	-	-	-	dfrA14.v2*	-	-	SHV-28^	-	-	-	-	KL2	K2	-	Typeable	99.84%	-	O1/O2v1	O1ab	-	Typeable
511348	2014-02-24	Jordan	Unknown	ST14	no	no	SAMN54588296	-	0	-	0	-	0	-	0	-	0	-	-	VIM-4	CTX-M-15	aac(3)-IIa.v1^;aac(6')-Ib-cr.v2;aac(6')-Il;ant(2'')-Ia;strA.v1;strB.v1	mcr-9.1	-	qnrB1.v2^	-	CatB4.v1	-	-	-	-	dfrA1.v2;dfrA14.v2*	OXA-1	-	SHV-28^	-	-	-	-	KL2	K2	-	Typeable	99.84%	-	O1/O2v1	O1ab	-	Typeable
511384	2014-02-24	Jordan	Unknown	ST198	no	no	SAMN54588297	ybt 9; ICEKp3	462-1LV	-	0	-	0	-	0	-	0	-	-	-	-	aadA^	-	-	-	-	-	-	sul1	-	-	-	-	-	SHV-77^	35Q	-	-	-	KL10	K10	-	Typeable	98.62%	-	O1/O2v1	O1ab	-	Typeable
511393	2014-02-24	Jordan	Unknown	ST20	no	no	SAMN54588298	-	0	-	0	-	0	-	0	-	0	-	-	-	-	strA.v1;strB.v1	-	-	-	-	-	-	-	-	-	-	-	-	SHV-187	-	-	-	-	KL28	K28	-	Typeable	99.76%	-	O1/O2v2	O1ab	-	Typeable
511409	2014-02-24	Jordan	Unknown	ST20	no	no	SAMN54588299	-	0	-	0	-	0	-	0	-	0	-	-	-	-	strA.v1;strB.v1	-	-	-	-	-	-	-	-	-	-	-	-	SHV-187	-	-	-	-	KL28	K28	-	Typeable	99.76%	-	O1/O2v2	O1ab	-	Typeable
511427	2014-02-24	Jordan	Unknown	ST420	no	no	SAMN54588300	ybt 10; ICEKp4	80	-	0	-	0	-	0	-	0	-	-	-	CTX-M-15	aac(3)-IIa.v1^;aac(6')-Ib-cr.v2;strA.v1^;strB.v1	-	-	-	-	-	-	sul2*	-	-	dfrA14.v2*	OXA-1;TEM-1D.v1^	-	SHV-1^	-	-	-	-	KL20	K20	-	Typeable	99.96%	-	O1/O2v1	O1ab	-	Typeable
511436	2014-02-24	Jordan	Unknown	ST420	no	no	SAMN54588301	ybt 10; ICEKp4	80	-	0	-	0	-	0	-	0	-	-	-	CTX-M-15	aac(3)-IIa.v1^;aac(6')-Ib-cr.v2;strA.v1^;strB.v1	-	-	-	-	-	-	sul2	-	-	dfrA14.v2*	OXA-1;TEM-1D.v1^	-	SHV-75	-	-	-	-	KL20	K20	-	Typeable	99.96%	-	O1/O2v1	O1ab	-	Typeable
511454	2014-02-24	Jordan	Unknown	ST405	no	no	SAMN54588302	ybt 27; ICEKp22	312-1LV	-	0	-	0	-	0	-	0	-	-	-	CTX-M-15	aac(6')-Ib-cr.v2;strA.v1^;strB.v1	-	-	qnrB1.v2^	-	-	-	-	tet(A).v1	-	dfrA14.v2*	OXA-1;TEM-1D.v1^	-	SHV-76	35Q	-	-	GyrA-87H	KL151	unknown (KL151)	-	Typeable	99.68%	-	O4	O4	-	Typeable
511506	2014-02-24	Jordan	Unknown	ST420	no	no	SAMN54588303	ybt 10; ICEKp4	80	-	0	-	0	-	0	-	0	-	-	-	CTX-M-15	strA.v1^;strB.v1	-	-	-	-	-	-	sul2*	-	-	dfrA14.v2*	-	-	SHV-75	-	-	-	-	KL20	K20	-	Typeable	99.96%	-	O1/O2v1	O1ab	-	Typeable
511533	2014-02-24	Jordan	Unknown	ST420	no	no	SAMN54588304	ybt 10; ICEKp4	80	-	0	-	0	-	0	-	0	-	-	-	CTX-M-15	aac(3)-IIa.v1^;aac(6')-Ib-cr.v2;strA.v1^;strB.v1	-	-	-	-	-	-	sul2*	-	-	dfrA14.v2*	OXA-1;TEM-1D.v1^	-	SHV-75	-	-	-	-	KL20	K20	-	Typeable	99.96%	-	O1/O2v1	O1ab	-	Typeable
511542	2014-02-24	Jordan	Unknown	ST420	no	no	SAMN54588305	ybt 10; ICEKp4	80	-	0	-	0	-	0	-	0	-	-	-	CTX-M-15	aac(3)-IIa.v1^;aac(6')-Ib-cr.v2;strA.v1^;strB.v1	-	-	-	-	-	-	sul2*	-	-	dfrA14.v2*	OXA-1;TEM-1D.v1^	-	SHV-1^	-	-	-	-	KL20	K20	-	Typeable	99.96%	-	O1/O2v1	O1ab	-	Typeable
511551	2014-02-24	Jordan	Unknown	ST29	no	no	SAMN54588306	ybt 14; ICEKp5	151	-	0	-	0	-	0	-	0	-	-	-	CTX-M-15	aac(3)-IIa.v1^;aac(6')-Ib-cr.v2;strA.v1^;strB.v1	-	-	qnrB1.v2^	-	-	-	sul2	tet(A).v1	-	dfrA14.v2*	OXA-1;TEM-1D.v1^	-	SHV-187	-	-	-	-	KL19	K19	-	Typeable	98.03%	-	O1/O2v2	O1ab	-	Typeable
511719	2014-02-24	Jordan	Unknown	ST14	no	no	SAMN54588307	-	0	-	0	-	0	-	0	-	0	-	-	-	CTX-M-15	aac(6')-Ib-cr.v2;strA.v1;strB.v1	-	-	qnrB1.v2^	-	-	-	-	-	-	dfrA14.v2*	OXA-1	-	SHV-28^	-	-	-	-	KL2	K2	!	Typeable	99.82%	-	O1/O2v1	O1ab	-	Typeable
511728	2014-02-24	Jordan	Unknown	ST1564	no	no	SAMN54588308	-	0	-	0	-	0	-	0	-	0	-	-	-	CTX-M-15	aac(6')-Ib-cr.v2;strA.v1^;strB.v1	-	-	qnrB1.v2^	-	-	-	sul2	tet(A).v1	-	dfrA14.v2*	OXA-1;TEM-1D.v1^	-	SHV-201	-	-	-	-	KL126	unknown (KL126)	?5	Typeable	98.00%	-	OL13	O13	?8+!	Typeable
511791	2014-02-24	Jordan	Unknown	ST405	no	no	SAMN54588309	ybt 27; ICEKp22	312-1LV	-	0	-	0	-	0	-	0	-	-	-	CTX-M-15	aac(6')-Ib-cr.v2;strA.v1^;strB.v1	-	-	qnrB1.v2^	-	-	-	sul2	tet(A).v1	-	dfrA14.v2*	OXA-1;TEM-1D.v1^	-	SHV-76	35Q	-	-	-	KL151	unknown (KL151)	-	Typeable	99.68%	-	O4	O4	-	Typeable
511843	2014-02-24	Jordan	Unknown	ST540	no	no	SAMN54588310	-	0	-	0	-	0	-	0	-	0	-	-	-	CTX-M-15	aac(6')-Ib-cr.v2;aadA2;aadA^;aph(3')-Ia*;strA.v1;strB.v1	-	-	qnrB1.v2^	-	cmlA1*	-	sul2;sul3	tet(A).v1	-	dfrA14.v2*	OXA-1^	-	SHV-42	25S	-	-	-	KL13	K13	-	Typeable	99.95%	-	O1/O2v1	O1ab	-	Typeable
512453	2014-12-15	Jordan	Unknown	ST831	no	no	SAMN54588312	ybt 10; ICEKp4	89-2LV	-	0	-	0	-	0	-	0	-	-	-	CTX-M-15	aac(6')-Ib-cr.v2;aph3-Ia.v1^;strA.v1^;strB.v1	-	-	qnrB1.v2^	-	-	-	sul2*	-	-	dfrA14.v2*	OXA-1;TEM-1D.v1^	-	SHV-11^	35Q	-	-	-	KL18	K18	-	Typeable	99.85%	-	O1/O2v1	O1ab	-	Typeable
512462	2014-12-15	Jordan	Unknown	ST278	no	no	SAMN54588313	-	0	-	0	-	0	-	0	-	0	-	-	-	CTX-M-15	strA.v1^;strB.v1	-	-	qnrB1.v2^;qnrS1	-	-	-	sul2	tet(A).v1	-	dfrA14.v2*	TEM-1D.v1^	-	SHV-27	156D	-	-	-	KL136	unknown (KL136)	?2	Typeable	99.63%	-	O1/O2v2	O2afg	-	Typeable
512480	2014-12-15	Jordan	Unknown	ST307	no	no	SAMN54588314	-	0	-	0	-	0	-	0	-	0	-	-	-	CTX-M-15	aac(3)-IIa.v1^;aac(6')-Ib-cr.v2;strA.v1^;strB.v1	-	-	qnrB1.v2^	-	-	-	sul2	tet(A).v1	-	dfrA14.v2*	OXA-1;TEM-206	-	SHV-28^	-	-	-	GyrA-83I;ParC-80I	KL102	unknown (KL102)	-	Typeable	99.66%	-	O1/O2v2	O2afg	-	Typeable
512499	2014-12-15	Jordan	Unknown	ST14	no	no	SAMN54588315	-	0	-	0	-	0	-	0	-	0	-	-	-	CTX-M-15	aac(3)-IIa.v1^;aac(6')-Ib-cr.v2;strA.v1;strB.v1	-	-	qnrB1.v2^	-	-	-	-	-	-	dfrA14.v2*	OXA-1	-	SHV-28^	-	-	-	-	KL2	K2	-	Typeable	99.83%	-	O1/O2v1	O1ab	-	Typeable
512505	2014-12-15	Jordan	Unknown	ST831	no	no	SAMN54588316	ybt 10; ICEKp4	89-2LV	-	0	-	0	-	0	-	0	-	-	-	CTX-M-15	aac(6')-Ib-cr.v2;aph3-Ia.v1^;strA.v1^;strB.v1	-	-	qnrB1.v2^	-	-	-	sul2*	-	-	dfrA14.v2*	OXA-1;TEM-1D.v1^	-	SHV-11^	35Q	-	-	-	KL18	K18	-	Typeable	99.85%	-	O1/O2v1	O1ab	-	Typeable
512514	2014-12-15	Jordan	Unknown	ST5118	no	no	SAMN54588317	-	0	-	0	-	0	-	0	-	0	-	-	-	CTX-M-15;TEM-169^	-	-	-	-	-	-	-	-	-	-	-	-	-	SHV-1^	-	-	-	-	KL16	K16	-	Typeable	99.76%	-	O1/O2v1	O1ab	-	Typeable
512532	2014-12-15	Jordan	Unknown	ST45	no	no	SAMN54588318	ybt 10; ICEKp4	78-1LV	-	0	-	0	-	0	-	0	-	-	-	CTX-M-15	aac(3)-IIa.v1^;aac(6')-Ib-cr.v2;strA.v1^;strB.v1	-	-	qnrB1.v2^	-	-	-	sul2	tet(A).v1	-	dfrA14.v2*	OXA-1;TEM-1D.v1^	-	SHV-1	-	-	-	-	KL62	K62	-	Typeable	99.97%	-	O1/O2v1	O2a	-	Typeable
512541	2014-12-15	Jordan	Unknown	ST45	no	no	SAMN54588319	ybt 10; ICEKp4	78-1LV	-	0	-	0	-	0	-	0	-	-	-	CTX-M-15	aac(3)-IIa.v1^;aac(6')-Ib-cr.v2;strA.v1^;strB.v1	-	-	qnrB1.v2^	-	-	-	sul2	tet(A).v1	-	dfrA14.v2*	OXA-1;TEM-1D.v1^	-	SHV-1	-	-	-	-	KL62	K62	-	Typeable	99.97%	-	O1/O2v1	O2a	-	Typeable
512550	2014-12-15	Jordan	Unknown	ST307	no	no	SAMN54588320	-	0	-	0	-	0	-	0	-	0	-	-	-	CTX-M-15	aac(3)-IIa.v1^;aac(6')-Ib-cr.v2;strA.v1^;strB.v1	-	-	qnrB1.v2^	-	-	-	sul2	tet(A).v1	-	dfrA14.v2*	OXA-1;TEM-206	-	SHV-28^	-	-	-	GyrA-83I;ParC-80I	KL102	unknown (KL102)	-	Typeable	99.65%	-	O1/O2v2	O2afg	-	Typeable
512569	2014-12-15	Jordan	Unknown	ST45	no	no	SAMN54588321	ybt 10; ICEKp4	78-1LV	-	0	-	0	-	0	-	0	-	-	-	CTX-M-15	strA.v1^;strB.v1	-	-	-	-	-	-	sul2	-	-	dfrA14.v2*	TEM-1D.v1^	-	SHV-1	-	-	-	-	KL62	K62	-	Typeable	99.97%	-	O1/O2v1	O2a	-	Typeable
512587	2014-12-15	Jordan	Unknown	ST14	no	no	SAMN54588322	-	0	-	0	-	0	-	0	-	0	-	-	-	CTX-M-15	strA.v1^;strB.v1	-	-	qnrB1.v2^	-	-	-	sul2	tet(A).v1	-	dfrA14.v2*	-	-	SHV-28^	-	-	-	-	KL2	K2	-	Typeable	99.84%	-	O1/O2v1	O1ab	-	Typeable
512602	2016-05-04	Jordan	Unknown	ST147	no	no	SAMN54588323	ybt 10; ICEKp4	384	-	0	-	0	-	0	-	0	-	-	NDM-1;OXA-48	CTX-M-15	aac(3)-IIa.v1^;aac(6')-Ib-Hangzhou*;aph3-Ia.v1^;strA.v1;strB.v1	-	-	-	Mrx;mphA	catII.2*	arr-2	-	-	-	dfrA12	OXA-1	-	SHV-11^	35Q	OmpK35-76%	-	GyrA-83I;ParC-80I	KL64	K64	-	Typeable	100.00%	-	O1/O2v1	O2a	-	Typeable
512611	2016-05-04	Jordan	Unknown	ST592	yes	no	SAMN54588324	-	0	-	0	iuc 1	5	iro 1	1	rmp 1; KpVP-1	26	rmpA2_5-54%	peg-344	-	-	-	-	-	-	-	-	-	-	-	-	-	-	-	SHV-26*	164H;omega-loop=HWETELNEALPGDARD	-	-	-	KL57	K57	?5	Typeable	99.93%	-	O3b	O3b	?3	Typeable
512657	2016-05-04	Jordan	Unknown	ST896	no	no	SAMN54588325	-	0	-	0	-	0	-	0	-	0	-	-	-	CTX-M-15	-	-	-	-	-	-	-	-	-	-	-	-	-	SHV-11^	35Q	-	-	-	KL3	K3	!	Typeable	99.71%	-	O1/O2v2	O2afg	-	Typeable
512684	2016-05-04	Jordan	Unknown	ST592	yes	no	SAMN54588326	-	0	-	0	iuc 1	5	iro 1	1	rmp 1; KpVP-1	26	rmpA2_5-54%	peg-344	-	-	-	-	-	-	-	-	-	-	-	-	-	-	-	SHV-26*	164H;omega-loop=HWETELNEALPGDARD	-	-	-	KL57	K57	?4	Typeable	99.93%	-	O3b	O3b	?2	Typeable
512718	2016-05-04	Jordan	Unknown	ST896	no	no	SAMN54588327	-	0	-	0	-	0	-	0	-	0	-	-	-	CTX-M-15	-	-	-	-	-	-	-	-	-	-	-	-	-	SHV-11^	35Q	-	-	-	KL3	K3	!	Typeable	99.71%	-	O1/O2v2	O2afg	-	Typeable
512745	2016-05-04	Jordan	Unknown	ST592	yes	yes	SAMN54588328	-	0	-	0	iuc 1	5	iro 1	1	rmp 1; KpVP-1	26	rmpA2_5-54%	peg-344	-	-	-	-	-	-	-	-	-	-	-	-	-	-	-		164H;omega-loop=HWETELNEALPGDARD	-	-	-	KL57	K57	?4!	Typeable	99.93%	-	O3b	O3b	?2	Typeable
512754	2016-05-04	Jordan	Unknown	ST784	no	no	SAMN54588329	-	0	-	0	-	0	-	0	-	0	-	-	-	CTX-M-15	aadA2^;aph3-Ia.v1^;strA.v1*;strB.v1*	-	-	qnrS1	Mrx;mphA	catII.2*	-	sul1;sul2	tet(A).v1	-	dfrA12	-	-	SHV-1	-	-	-	-	KL146	unknown (KL146)	-	Typeable	97.28%	-	O1/O2v2	O2afg	-	Typeable
513160	2016-05-04	Jordan	Unknown	ST4316-1LV	no	no	SAMN54588331	-	0	-	0	-	0	-	0	-	0	-	-	-	-	-	-	-	-	-	-	-	-	-	-	-	-	-	LEN-27^	-	-	-	-	KL107	unknown (KL107)	-	Typeable	98.90%	-	O3/O3a	O3/O3a	-	Typeable
513267	2016-05-04	Jordan	Unknown	ST101	no	no	SAMN54588332	ybt 9; ICEKp3 (truncated)	183-2LV	-	0	-	0	-	0	-	0	-	-	OXA-48	CTX-M-15	aac(3)-IIa.v1^;aadA2;aadA^;aph(3')-VIb*;strA.v1	-	-	-	mphA	cmlA1*;floR.v1*	-	sul3	-	-	dfrA14.v2*	-	-	SHV-1^	-	OmpK35-17%;OmpK36GD	MgrB-34%	GyrA-83Y;GyrA-87N;ParC-80I	KL17	K17	-	Typeable	99.98%	-	O1/O2v1	O1ab	?2	Typeable
513294	2016-05-04	Jordan	Unknown	ST101	no	no	SAMN54588334	ybt 9; ICEKp3 (truncated)	183-2LV	-	0	-	0	-	0	-	0	-	-	OXA-48	CTX-M-14^;CTX-M-15	aac(3)-IIa.v1^;aadA2;aadA^;aph(3')-VIb*;strA.v1;strA.v1	-	-	-	Mrx;mphA	cmlA1*;floR.v1*	-	sul3	-	-	dfrA14.v2*	-	-	SHV-1^	-	OmpK35-17%;OmpK36GD	MgrB-36%	GyrA-83Y;GyrA-87N;ParC-80I	KL17	K17	-	Typeable	99.97%	-	O1/O2v1	O1ab	?2	Typeable
513328	2016-05-04	Jordan	Unknown	ST101	no	no	SAMN54588335	ybt 9; ICEKp3 (truncated)	183-2LV	-	0	-	0	-	0	-	0	-	-	OXA-48	CTX-M-14^;CTX-M-15	aac(3)-IIa.v1^;aadA2;aadA^;aph(3')-VIb*;strA.v1;strA.v1	-	-	-	Mrx;mphA	cmlA1*;floR.v1*	-	sul3	-	-	dfrA14.v2*	-	-	SHV-1^	-	OmpK35-17%;OmpK36GD	MgrB-36%	GyrA-83Y;GyrA-87N;ParC-80I	KL17	K17	-	Typeable	99.98%	-	O1/O2v1	O1ab	-	Typeable
513364	2014-02-24	Jordan	Unknown	ST485	no	no	SAMN54588336	-	0	-	0	-	0	-	0	-	0	-	-	-	CTX-M-15	aac(3)-IIa.v1^	-	-	qnrB1.v1	-	-	-	-	tet(A).v1	-	-	OXA-1	-	SHV-27^	156D	OmpK35-46%	-	GyrA-83I	KL28	K28	-	Typeable	99.84%	-	O1/O2v1	O2a	-	Typeable
513382	2014-02-24	Jordan	Unknown	ST342	no	no	SAMN54588337	-	0	-	0	-	0	-	0	-	0	-	-	-	-	-	-	-	-	-	-	-	-	-	-	-	-	-	SHV-60	35Q	-	-	-	KL30	K30	-	Typeable	97.39%	-	O1/O2v2	O1ab	-	Typeable
513416	2014-02-24	Jordan	Unknown	ST152	no	no	SAMN54588338	ybt 9; ICEKp3	518-1LV	-	0	-	0	-	0	-	0	-	-	-	-	-	-	-	-	-	-	-	-	-	-	-	-	-	SHV-1^	-	-	-	-	KL46	K46	?3	Typeable	99.75%	-	O3b	O3b	?4	Typeable
513452	2014-02-24	Jordan	Unknown	ST409	no	no	SAMN54588339	-	0	-	0	-	0	-	0	-	0	-	-	-	-	strA.v1;strB.v1	-	-	-	-	-	-	-	tet(B).v2*;tetR	-	-	-	-	SHV-27	156D	-	-	-	KL183	unknown (KL183)	?6	Typeable	98.57%	-	OL13	O13	?7+!	Typeable
513489	2014-02-24	Jordan	Unknown	ST16	no	no	SAMN54588340	ybt 10; ICEKp4	91-1LV	-	0	-	0	-	0	-	0	-	-	-	CTX-M-15	aac(6')-Ib-cr.v2;aadA2^;aph3-Ia.v1^	-	-	-	Mrx;mphA	-	-	sul1	tet(A).v1	-	dfrA12	OXA-1;TEM-1D.v1^	-	SHV-1	-	-	-	GyrA-83F;GyrA-87N;ParC-84K	KL51	K51	-	Typeable	100.00%	-	O3b	O3b	-	Typeable
513531	2014-12-15	Jordan	Unknown	ST14	no	no	SAMN54588341	ybt 10; ICEKp4	107-1LV	-	0	-	0	-	0	-	0	-	-	-	-	aph3-Ia.v1^;strA.v1^;strB.v1	-	-	-	-	-	-	sul1;sul2*	tet(D)	-	dfrA7	-	-	SHV-1^	-	-	-	-	KL16	K16	-	Typeable	99.74%	-	O1/O2v1	O1ab	-	Typeable
513629	2014-02-24	Jordan	Unknown	ST29	no	no	SAMN54588342	ybt 14; ICEKp5	151	-	0	-	0	-	0	-	0	-	-	-	CTX-M-15	aac(3)-IIa.v1^;aac(6')-Ib-cr.v2;aadA2^;aph3-Ia.v1^;strA.v1^;strB.v1	mcr-8.1	-	qnrB1.v2^	Mrx;mphA	floR.v1*	-	sul1;sul2	tet(A).v1	-	dfrA12;dfrA14.v2*	OXA-1;TEM-1D.v1^	-	SHV-187	-	-	-	-	KL19	K19	-	Typeable	98.03%	-	O1/O2v2	O1ab	-	Typeable
513647	2014-02-24	Jordan	Unknown	ST5966	no	no	SAMN54588343	-	0	-	0	-	0	-	0	-	0	-	-	-	CTX-M-15	aac(3)-IIa.v1^;aac(6')-Ib-cr.v2;strA.v1^;strB.v1	-	-	qnrB1.v2^	-	-	-	sul2	tet(A).v1	-	dfrA14.v2*	OXA-1;TEM-1D.v1^	-	SHV-1^	-	-	-	-	KL124	unknown (KL124)	!	Typeable	98.20%	-	O1/O2v1	O1ab	-	Typeable
513665	2014-02-24	Jordan	Unknown	ST29	no	no	SAMN54588344	ybt 14; ICEKp5	151	-	0	-	0	-	0	-	0	-	-	-	CTX-M-15	aac(3)-IIa.v1^;aac(6')-Ib-cr.v2;strA.v1^;strB.v1	-	-	qnrB1.v2^	-	-	-	sul2	tet(A).v1	-	dfrA14.v2*	OXA-1;TEM-1D.v1^	-	SHV-187	-	-	-	-	KL19	K19	?2	Typeable	98.05%	-	O1/O2v2	O1ab	-	Typeable
513692	2014-02-24	Jordan	Unknown	ST29	no	no	SAMN54588345	ybt 14; ICEKp5	151	-	0	-	0	-	0	-	0	-	-	-	CTX-M-15	aac(3)-IIa.v1^;aac(6')-Ib-cr.v2;aadA2^;aph3-Ia.v1^;strA.v1^;strB.v1	mcr-8.1	-	qnrB1.v2^	Mrx;mphA	floR.v1*	-	sul1;sul2	tet(A).v1	-	dfrA12;dfrA14.v2*	OXA-1;TEM-1D.v1^	-	SHV-187	-	-	-	-	KL19	K19	-	Typeable	98.03%	-	O1/O2v2	O1ab	-	Typeable
513717	2014-02-24	Jordan	Unknown	ST15	no	no	SAMN54588346	-	0	-	0	-	0	-	0	-	0	-	-	-	CTX-M-15	aac(3)-IIa.v1^;aac(6')-Ib-cr.v2;aadA2^;aph3-Ia.v1^;strA.v1^;strB.v1	mcr-8.1	-	qnrB1.v2^	Mrx;mphA	floR.v1*	-	sul1;sul2	tet(A).v1	-	dfrA12;dfrA14.v2*	OXA-1;TEM-1D.v1^	-	SHV-28^	-	-	-	GyrA-83F;GyrA-87A;ParC-80I	KL39	K39	?2	Typeable	99.31%	-	O1/O2v1	O1ab	-	Typeable
513762	2014-02-24	Jordan	Unknown	ST307	no	no	SAMN54588347	-	0	-	0	-	0	-	0	-	0	-	-	-	CTX-M-15	aac(3)-IIa.v1^;aac(6')-Ib-cr.v2;strA.v1^;strB.v1	-	-	qnrB1.v2^	-	-	-	sul2	tet(A).v1	-	dfrA14.v2*	OXA-1;TEM-1D.v1^	-	SHV-28^	-	-	-	GyrA-83I;ParC-80I	KL102	unknown (KL102)	-	Typeable	99.66%	-	O1/O2v2	O2afg	-	Typeable
513799	2014-02-24	Jordan	Unknown	ST29	no	no	SAMN54588348	ybt 14; ICEKp5	151	-	0	-	0	-	0	-	0	-	-	-	CTX-M-15	aac(3)-IIa.v1^;aac(6')-Ib-cr.v2;strA.v1^;strB.v1	-	-	qnrB1.v2^	-	-	-	sul2	tet(A).v1	-	dfrA14.v2*	OXA-1;TEM-1D.v1^	-	SHV-187	-	-	-	-	KL19	K19	-	Typeable	98.03%	-	O1/O2v2	O1ab	-	Typeable
513896	2014-12-15	Jordan	Unknown	ST171	no	no	SAMN54588349	-	0	-	0	-	0	-	0	-	0	-	-	-	-	-	-	-	-	-	-	-	-	-	-	-	-	-	SHV-27	156D	-	-	-	KL122	unknown (KL122)	-	Typeable	99.92%	-	O1/O2v2	O1ab	-	Typeable
513939	2014-12-15	Jordan	Unknown	ST15	no	no	SAMN54588350	ybt 10; ICEKp4	28	-	0	-	0	-	0	-	0	-	-	-	CTX-M-15	aac(6')-Ib-cr.v2;aadA2^;aph3-Ia.v1^	-	-	-	Mrx;mphA	-	-	sul1	tet(A).v1	-	dfrA12	OXA-1;TEM-1D.v1^	-	SHV-28^	-	-	-	GyrA-83F;GyrA-87A;ParC-80I	KL24	K24	-	Typeable	100.00%	-	O1/O2v1	O1ab	-	Typeable
514008	2014-02-24	Jordan	Unknown	ST16	no	no	SAMN54588351	ybt 10; ICEKp4	91-1LV	-	0	-	0	-	0	-	0	-	-	-	CTX-M-15	aac(6')-Ib-cr.v2;aadA2^;aph3-Ia.v1^	-	-	-	Mrx;mphA	-	-	sul1	tet(A).v1	-	dfrA12	OXA-1;TEM-1D.v1^	-	SHV-1	-	-	-	GyrA-83F;GyrA-87N;ParC-84K	KL51	K51	-	Typeable	100.00%	-	O3b	O3b	-	Typeable
514062	2014-02-24	Jordan	Unknown	ST37	no	no	SAMN54588352	-	0	-	0	-	0	-	0	-	0	-	-	-	CTX-M-15	aac(3)-IIa.v1^;aac(6')-Ib-cr.v2;strA.v1^;strB.v1	-	-	qnrB1.v2^	-	-	-	sul2	-	-	dfrA14.v2*	OXA-1;TEM-1D.v1^	-	SHV-11^	35Q	-	-	-	KL15	K15	-	Typeable	99.84%	-	O4	O4	-	Typeable
514099	2014-12-15	Jordan	Unknown	ST101	no	no	SAMN54588353	ybt 9; ICEKp3	183-1LV	-	0	-	0	-	0	-	0	-	-	OXA-48	CTX-M-14^	aac(3)-IIa.v1^;aadA2;aph(3')-VIb*;strA.v1	-	-	-	Mrx;mphA	cmlA1*;floR.v1*	-	sul3	-	-	dfrA14.v2*	OXA-9.v1	-	SHV-1^	-	OmpK35-17%;OmpK36GD	-	GyrA-83Y;GyrA-87N;ParC-80I	KL17	K17	-	Typeable	99.91%	-	O1/O2v1	O1ab	-	Typeable
514141	2014-12-15	Jordan	Unknown	ST278	no	no	SAMN54588354	-	0	-	0	-	0	-	0	-	0	-	-	-	CTX-M-15	strA.v1^;strB.v1	-	-	qnrB1.v2^;qnrS1	-	-	-	sul2	tet(A).v1	-	dfrA14.v2*	TEM-1D.v1^	-	SHV-27	156D	-	-	-	KL136	unknown (KL136)	-	Typeable	99.61%	-	O1/O2v2	O2afg	-	Typeable
514187	2014-12-15	Jordan	Unknown	ST278	no	no	SAMN54588355	-	0	-	0	-	0	-	0	-	0	-	-	-	CTX-M-15	strA.v1^;strB.v1	-	-	qnrB1.v2^;qnrS1	-	-	-	sul2	tet(A).v1	-	dfrA14.v2*	TEM-1D.v1^	-	SHV-27	156D	-	-	-	KL136	unknown (KL136)	?2	Typeable	99.63%	-	O1/O2v2	O2afg	-	Typeable
514257	2014-12-15	Jordan	Unknown	ST881	no	no	SAMN54588356	-	0	-	0	-	0	-	0	-	0	-	-	-	CTX-M-14	aac(3)-IId^;strA.v1^;strB.v1	-	-	qnrS1	-	-	-	sul1;sul2	tet(A).v1	-	dfrA1.v1	LAP-2	-	SHV-27	156D	-	-	-	KL2	K2	-	Typeable	99.56%	-	O1/O2v2	O1ab	-	Typeable
514293	2014-12-15	Jordan	Unknown	ST14	no	no	SAMN54588357	-	0	-	0	-	0	-	0	-	0	-	-	-	-	-	-	-	-	-	-	-	-	-	-	-	-	-	SHV-28^	-	-	-	-	KL2	K2	-	Typeable	99.81%	-	O1/O2v1	O1ab	-	Typeable
514363	2014-12-15	Jordan	Unknown	ST45	no	no	SAMN54588358	ybt 10; ICEKp4	78-1LV	-	0	-	0	-	0	-	0	-	-	-	CTX-M-15	aac(3)-IIa.v1^;aac(6')-Ib-cr.v2;strA.v1^;strB.v1	-	-	qnrB1.v2^	-	-	-	sul2	tet(A).v1	-	dfrA14.v2*	OXA-1;TEM-1D.v1^	-	SHV-1	-	-	-	-	KL62	K62	-	Typeable	99.97%	-	O1/O2v1	O2a	-	Typeable
514460	2014-12-15	Jordan	Unknown	ST985	no	no	SAMN54588359	ybt 16; ICEKp12	277-1LV	-	0	-	0	-	0	-	0	-	-	-	CTX-M-15	aac(3)-IIa.v1^;aac(6')-Ib-cr.v2;strA.v1^;strB.v1	-	-	qnrB1.v2^	-	-	-	sul2	tet(A).v1	-	dfrA14.v2*	OXA-1;TEM-1D.v1^	-	SHV-187	-	-	-	-	KL39	K39	-	Typeable	99.80%	-	O1/O2v2	O1ab	-	Typeable
514479	2014-12-15	Jordan	Unknown	ST101	no	no	SAMN54588360	-	0	-	0	-	0	-	0	-	0	-	-	-	CTX-M-15	strA.v1^;strB.v1	-	-	qnrS1	-	-	-	sul2	tet(A).v1	-	dfrA14.v2*	TEM-1D.v1^	-	SHV-1^	-	-	-	-	KL17	K17	-	Typeable	99.99%	-	O1/O2v1	O1ab	-	Typeable
514512	2014-12-15	Jordan	Unknown	ST101	no	no	SAMN54588361	ybt 9; ICEKp3	183	-	0	-	0	-	0	-	0	-	-	-	CTX-M-15	aac(3)-IIa.v1^;aac(6')-Ib-cr.v2	-	-	-	-	-	-	-	tet(D)	-	dfrA14.v2*	OXA-1;TEM-1D.v1^	-	SHV-1^	-	OmpK35-17%;OmpK36GD	-	GyrA-83Y;GyrA-87N;ParC-80I	KL17	K17	-	Typeable	99.99%	-	O1/O2v1	O1ab	-	Typeable
514691	2014-12-15	Jordan	Unknown	ST219	no	no	SAMN54588362	-	0	-	0	-	0	-	0	-	0	-	-	-	CTX-M-15	aadA2^;aph3-Ia.v1^;strB.v1	-	-	qnrS1	Mrx;mphA	-	-	sul1;sul2	tet(A).v1	-	dfrA12	TEM-1D.v1^	-	SHV-1^	-	-	-	-	KL114	unknown (KL114)	-	Typeable	99.83%	-	O1/O2v1	O1ab	-	Typeable
514743	2014-12-15	Jordan	Unknown	ST219	no	no	SAMN54588363	-	0	-	0	-	0	-	0	-	0	-	-	-	CTX-M-15	aadA2^;aph3-Ia.v1^;strB.v1	-	-	qnrS1	Mrx;mphA	-	-	sul1;sul2	tet(A).v1	-	dfrA12	TEM-1D.v1^	-	SHV-1^	-	-	-	-	KL114	unknown (KL114)	-	Typeable	99.83%	-	O1/O2v1	O1ab	-	Typeable
514822	2014-12-15	Jordan	Unknown	ST14	no	no	SAMN54588364	ybt 16; ICEKp12	530	-	0	-	0	-	0	-	0	-	-	-	-	-	-	-	-	-	-	-	-	-	-	-	-	-	SHV-28^	-	-	-	-	KL2	K2	-	Typeable	99.84%	-	O1/O2v1	O1ab	-	Typeable
514840	2014-12-15	Jordan	Unknown	ST14	no	no	SAMN54588365	ybt 16; ICEKp12	530	-	0	-	0	-	0	-	0	-	-	-	-	-	-	-	-	-	-	-	-	-	-	-	-	-	SHV-28^	-	-	-	-	KL2	Capsule null	!	Typeable	99.84%	-	O1/O2v1	O1ab	?3	Typeable
514877	2014-12-15	Jordan	Unknown	ST14	no	no	SAMN54588366	ybt 10; ICEKp4	107-1LV	-	0	-	0	-	0	-	0	-	-	-	-	aph3-Ia.v1^;strA.v1^;strB.v1	-	-	-	-	-	-	sul1;sul2*	tet(D)	-	dfrA7	-	-	SHV-1^	-	-	-	-	KL16	K16	-	Typeable	99.74%	-	O1/O2v1	O1ab	-	Typeable
514910	2016-05-04	Jordan	Unknown	ST20	no	no	SAMN54588367	-	0	-	0	-	0	-	0	-	0	-	-	-	CTX-M-14^	aph(3')-VIb*;strA.v1	-	-	-	-	-	-	-	-	-	-	-	-	SHV-187	-	-	-	-	KL28	K28	-	Typeable	99.76%	-	O1/O2v2	O1ab	-	Typeable
514929	2016-05-04	Jordan	Human	ST11	no	no	SAMN54588368	ybt 9; ICEKp3	183	-	0	-	0	-	0	-	0	-	-	NDM-1	-	aac(3)-IIa.v1^;aac(6')-Ib-Hangzhou*, rmtF	-	-	-	-	-	arr-2	-	-	-	-	OXA-1	-	SHV-11	35Q	-	-	GyrA-83I;ParC-80I	KL15	K15	?2	Typeable	99.92%	-	O4	O4	?2	Typeable
514938	2016-05-04	Jordan	Unknown	ST1418	no	no	SAMN54588369	ybt 10; ICEKp4	78	-	0	-	0	-	0	-	0	-	-	-	CTX-M-15	aac(3)-IIa.v1;strA.v1*;strB.v1*	-	-	-	-	catII.2*	-	sul2	tet(D)	-	dfrA14.v2*	TEM-1D.v1^	-	SHV-1*	-	-	-	-	KL13	K13	?3	Typeable	99.45%	-	O3b	O3b	?4	Typeable
514965	2016-05-04	Jordan	Unknown	ST1412	no	no	SAMN54588370	-	0	-	0	-	0	-	0	-	0	-	-	-	CTX-M-15	aadA2^;aph3-Ia.v1^;strA.v1*;strB.v1*	-	-	qnrS1	Mrx;mphA	-	-	sul1;sul2	-	-	dfrA12	-	-	SHV-1	-	-	-	-	KL107	unknown (KL107)	-	Typeable	99.96%	-	O1/O2v2	O2afg	-	Typeable
514974	2016-05-04	Jordan	Human	ST11	no	no	SAMN54588371	ybt 9; ICEKp3	183	-	0	-	0	-	0	-	0	-	-	NDM-1	-	aac(3)-IIa.v1^, rmtF	-	-	-	-	-	arr-2	-	-	-	-	OXA-1	-	SHV-11	35Q	-	-	GyrA-83I;ParC-80I	KL15	K15	?2	Typeable	99.92%	-	O4	O4	?2	Typeable
515061	2014-12-15	Jordan	Unknown	ST25	no	no	SAMN54588372	-	0	-	0	-	0	-	0	-	0	-	-	-	-	strA.v1;strB.v1	-	-	-	-	catA1*	-	sul1;sul2	tet(D)	-	dfrA15.v2	-	-	SHV-1^	-	-	-	-	KL2	K2	-	Typeable	99.56%	-	O1/O2v2	O1ab	-	Typeable
515070	2014-12-15	Jordan	Unknown	ST25	no	no	SAMN54588373	-	0	-	0	-	0	-	0	-	0	-	-	-	-	strA.v1;strB.v1	-	-	-	-	catA1*	-	sul1;sul2	tet(D)	-	dfrA15.v2	-	-	SHV-1^	-	-	-	-	KL2	K2	-	Typeable	99.56%	-	O1/O2v2	O1ab	-	Typeable
515089	2014-12-15	Jordan	Unknown	ST268	no	no	SAMN54588374	ybt 10; ICEKp4	481	-	0	-	0	-	0	-	0	-	-	-	CTX-M-15	aadA*	-	-	-	-	-	-	-	-	-	-	OXA-1	-	SHV-11^	35Q	-	-	-	KL20	K20	-	Typeable	99.97%	-	O1/O2v1	O2a	-	Typeable
515247	2016-05-04	Jordan	Unknown	ST23-KL1	no	no	SAMN54588375	ybt 1; ICEKp10	53-1LV	clb 2	29	-	0	-	0	-	0	-	-	NDM-1;OXA-48	CTX-M-14^;CTX-M-15	aadA*;strA.v1	-	-	-	-	-	-	-	-	-	-	-	-	SHV-11^	35Q	-	-	-	KL1	K1	-	Typeable	99.99%	-	O1/O2v2	O1ab	!	Typeable
515256	2016-05-04	Jordan	Unknown	ST383	no	no	SAMN54588376	-	0	-	0	-	0	-	0	-	0	-	-	OXA-48	CTX-M-14^	aac(3)-IIa.v1;aph(3')-VIb*;strA.v1	-	-	-	Mrx;mphA	catA1^	-	-	tet(A).v1	-	dfrA14.v2*	TEM-1D.v1^	-	SHV-1	-	OmpK35-10%;OmpK36GD	-	GyrA-83F;GyrA-87N;ParC-80I	KL30	K30	!	Typeable	97.43%	-	O1/O2v2	O1ab	-	Typeable
515274	2016-05-04	Jordan	Unknown	ST383	no	no	SAMN54588377	-	0	-	0	-	0	-	0	-	0	-	-	OXA-48	CTX-M-14^	aph(3')-VIb*;strA.v1	-	-	-	Mrx;mphA	catA1^	-	-	tet(A).v1	-	dfrA14.v2*	-	-	SHV-1	-	OmpK35-10%;OmpK36GD	-	GyrA-83F;GyrA-87N;ParC-80I	KL30	K30	!	Typeable	97.43%	-	O1/O2v2	O1ab	-	Typeable
515283	2016-05-04	Jordan	Unknown	ST152	no	no	SAMN54588378	ybt 10; ICEKp4	325-1LV	-	0	-	0	-	0	-	0	-	-	NDM-1	CTX-M-15	aac(6')-Ib4*;aph3-Ia.v1^;rmtC;strA.v1^;strB.v1	-	-	-	Mrx;mphA	-	-	sul1*;sul2	-	-	dfrA14.v2*	OXA-1;TEM-1D.v1^	-	SHV-1^	-	-	-	GyrA-83F;GyrA-87A;ParC-80I	KL149	unknown (KL149)	-	Typeable	99.98%	-	O4	O4	-	Typeable
515292	2016-05-04	Jordan	Unknown	ST45	no	no	SAMN54588379	ybt 10; ICEKp4	78	-	0	-	0	-	0	-	0	-	-	-	-	aac(3)-IIa.v1;aadA*	-	-	qnrS1	-	cmlA5;floR.v1*	arr-2	sul3	tet(A).v1*	-	-	OXA-10	-	SHV-11^	35Q	-	-	-	KL62	K62	?2	Typeable	99.97%	-	O1/O2v1	O2a	?2	Typeable
515308	2016-05-04	Jordan	Unknown	ST323	no	no	SAMN54588380	-	0	-	0	-	0	-	0	-	0	-	-	NDM-1	CTX-M-15	aadA^;aph(3')-VI	-	-	qnrS1	-	-	-	sul1	-	-	-	-	-	SHV-1^	-	-	-	-	KL21	K21	?3	Typeable	99.99%	-	O3b	O3b	?2	Typeable
515335	2016-05-04	Jordan	Unknown	ST48	no	no	SAMN54588381	ybt 10; ICEKp4	81	-	0	-	0	-	0	-	0	-	-	-	CTX-M-15;SHV-5^	aac(3)-IIg;aac(6')-IIc;aadA*	-	-	qnrB4	-	catA1^	-	sul1^	tet(A).v1	-	dfrA30*	DHA-25;OXA-1	-	-	238S;240K	-	-	GyrA-83F	KL124	unknown (KL124)	-	Typeable	99.80%	-	O1/O2v1	O1ab	-	Typeable
515432	2014-12-15	Jordan	Unknown	ST1399	yes	yes	SAMN54588382	ybt 14; ICEKp5	145-2LV	-	0	iuc 1	63	-	0	-	0	rmpA2_6*-47%	-	-	CTX-M-15;SHV-12^	aac(6')-Ib'.v1;ant(2'')-Ia;strA.v1^;strB.v1	-	-	qnrS1	-	cmlA5	-	sul1;sul2^	-	-	dfrA7	TEM-1D.v1^	-	-	238S;240K;35Q	OmpK35-59%	-	GyrA-83Y	KL43	K43	-	Typeable	99.97%	-	O1/O2v1	O2ac	-	Typeable
515502	2014-12-15	Jordan	Unknown	ST37	no	no	SAMN54588383	-	0	-	0	-	0	-	0	-	0	-	-	-	CTX-M-15	aac(3)-IIa.v1^;aac(6')-Ib-cr.v2;strA.v1^;strB.v1	-	-	qnrB1.v2^	-	-	-	sul2	tet(A).v1	-	dfrA14.v2*	OXA-1;TEM-1D.v1^	-	SHV-11^	35Q	-	-	-	KL15	K15	-	Typeable	99.84%	-	O4	O4	-	Typeable
515511	2014-12-15	Jordan	Unknown	ST607	no	no	SAMN54588384	ybt 15; ICEKp11	238-4LV	-	0	-	0	-	0	-	0	-	-	-	CTX-M-15	aac(6')-Ib-cr.v2	-	-	-	-	-	-	-	-	-	-	OXA-1	-	SHV-1^	-	-	-	-	KL48	K48	-	Typeable	97.73%	-	O1/O2v1	O1ab	-	Typeable
515539	2016-05-04	Jordan	Unknown	ST383	no	no	SAMN54588385	-	0	-	0	-	0	-	0	-	0	-	-	OXA-48	CTX-M-14^	aac(3)-IIa.v1;aph(3')-VIb*;strA.v1	-	-	-	Mrx;mphA	catA1^	-	-	tet(A).v1	-	dfrA14.v2*	TEM-1D.v1^	-	SHV-1	-	OmpK35-10%;OmpK36GD	-	GyrA-83F;GyrA-87N;ParC-80I	KL30	K30	!	Typeable	97.43%	-	O1/O2v2	O1ab	-	Typeable
515548	2016-05-04	Jordan	Unknown	ST147	no	no	SAMN54588386	ybt 9; ICEKp3	173-2LV	-	0	-	0	-	0	-	0	-	-	-	CTX-M-15	aadA*;aadA2^;aph3-Ia.v1^;strA.v1*;strB.v1*	-	-	qnrS1	Mrx;mphA	-	-	sul1;sul2	-	-	dfrA12	OXA-9.v1	-	SHV-11^	35Q	OmpK35-25%	-	GyrA-83I;ParC-80I	KL64	K64	-	Typeable	99.99%	-	O1/O2v1	O2a	-	Typeable
515557	2016-05-04	Jordan	Unknown	ST383	no	no	SAMN54588387	-	0	-	0	-	0	-	0	-	0	-	-	OXA-48	CTX-M-14^	aac(3)-IIa.v1;aph(3')-VIb*;strA.v1, rmtF	-	-	-	Mrx;mphA	catA1^	-	-	tet(A).v1	-	dfrA14.v2*	TEM-1D.v1^	-	SHV-1	-	OmpK35-10%;OmpK36GD	-	GyrA-83F;GyrA-87N;ParC-80I	KL30	K30	!	Typeable	97.43%	-	O1/O2v2	O1ab	-	Typeable
515566	2016-05-04	Jordan	Unknown	ST147	no	no	SAMN54588388	ybt 9; ICEKp3	173-2LV	-	0	-	0	-	0	-	0	-	-	NDM-1	CTX-M-15	aadA*;aadA2^;aph(3')-VI;aph3-Ia.v1^;strA.v1*;strB.v1*	-	-	qnrS1	Mrx;mphA	-	arr-3	sul1;sul2	-	-	dfrA12	OXA-9.v1	-	SHV-11^	35Q	OmpK35-25%	-	GyrA-83I;ParC-80I	KL64	K64	-	Typeable	100.00%	-	O1/O2v1	O2a	-	Typeable
515575	2016-05-04	Jordan	Human	ST11	no	no	SAMN54588389	ybt 9; ICEKp3 (truncated)	183-1LV	-	0	-	0	-	0	-	0	-	-	NDM-1	CTX-M-15	aac(3)-IIa.v1^;aadA2^;aph3-Ia.v1^	-	-	-	Mrx;mphA	-	arr-2	sul1	-	-	dfrA12	OXA-1	-	SHV-11	35Q	-	-	GyrA-83I;ParC-80I	KL15	K15	-	Typeable	99.92%	-	O4	O4	-	Typeable
515593	2016-05-04	Jordan	Unknown	ST3154	no	no	SAMN54588390	-	0	-	0	-	0	-	0	-	0	-	-	-	CTX-M-15	strA.v1^;strB.v1	-	-	qnrB1.v2^	-	-	-	sul2	tet(A).v1	-	dfrA14.v2*	TEM-1D.v1^	-	SHV-65^	-	-	-	-	KL8	K8	?4!	Typeable	98.63%	-	O1/O2v2	O1ab	?2	Typeable
515654	2016-05-04	Jordan	Unknown	ST1408	no	no	SAMN54588391	-	0	-	0	-	0	-	0	-	0	-	-	-	-	-	-	-	-	-	-	-	-	-	-	-	-	-	SHV-11^	35Q	-	-	-	KL102	unknown (KL102)	-	Typeable	99.69%	-	O1/O2v2	O2afg	!	Typeable
516255	2016-05-04	Jordan	Unknown	ST14	no	no	SAMN54588392	-	0	-	0	-	0	-	0	-	0	-	-	NDM-1	CTX-M-15	aac(3)-IIa.v1^;aadA*;aph(3')-VI	-	-	qnrB1.v2^;qnrS1	-	-	-	-	tet(A).v1	-	dfrA14.v2*	OXA-1	-	SHV-28^	-	-	-	-	KL2	K2	-	Typeable	99.80%	-	O1/O2v1	O1ab	-	Typeable
516264	2016-05-04	Jordan	Unknown	ST45	no	no	SAMN54588393	ybt 10; ICEKp4	78	-	0	-	0	-	0	-	0	-	-	-	-	-	-	-	-	-	-	-	-	-	-	-	-	-	SHV-1	-	-	-	-	KL24	K24	-	Typeable	99.53%	-	O1/O2v1	O2a	-	Typeable
516282	2016-05-04	Jordan	Unknown	ST16	no	no	SAMN54588394	ybt 10; ICEKp4	91-2LV	-	0	-	0	-	0	-	0	-	-	-	CTX-M-15	aadA2^	-	-	-	Mrx;mphA	-	-	sul1	-	-	dfrA12	TEM-1D.v1^	-	SHV-1	-	-	-	GyrA-83F;GyrA-87N;ParC-84K	KL51	K51	-	Typeable	100.00%	-	O3b	O3b	-	Typeable
516291	2016-05-04	Jordan	Unknown	ST16	no	no	SAMN54588395	ybt 10; ICEKp4	91-2LV	-	0	-	0	-	0	-	0	-	-	-	CTX-M-15	aadA2^	-	-	-	Mrx;mphA	-	-	sul1	-	-	dfrA12	TEM-1D.v1^	-	SHV-1	-	-	-	GyrA-83F;GyrA-87N;ParC-84K	KL51	K51	-	Typeable	100.00%	-	O3b	O3b	-	Typeable
516307	2016-05-04	Jordan	Unknown	ST101	no	no	SAMN54588396	ybt 9; ICEKp3 (truncated)	183-2LV	-	0	-	0	-	0	-	0	-	-	OXA-48	CTX-M-14^;CTX-M-15	aac(3)-IIa.v1^;aadA2;aadA^;aph(3')-VIb*;strA.v1	-	-	-	Mrx;mphA	cmlA1*;floR.v1*	-	sul3	-	-	dfrA14.v2*	-	-	SHV-1^	-	OmpK35-17%;OmpK36GD	MgrB-34%	GyrA-83Y;GyrA-87N;ParC-80I	KL17	K17	-	Typeable	99.98%	-	O1/O2v1	O1ab	?2	Typeable
516343	2016-05-04	Jordan	Unknown	ST307	yes	yes	SAMN54588397	-	0	-	0	iuc 1	1	-	0	-	0	rmpA2_8*-60%	-	-	CTX-M-15	aac(3)-IIa.v1^;aac(6')-Ib-cr.v2;aadA^	-	-	qnrB1.v2^	-	-	-	sul1	tet(A).v1	-	dfrA14.v2*	OXA-1	-	SHV-28^	-	-	-	GyrA-83I;ParC-80I	KL102	unknown (KL102)	-	Typeable	99.66%	-	O1/O2v2	O2afg	-	Typeable
516352	2016-05-04	Jordan	Unknown	ST307	yes	no	SAMN54588398	-	0	-	0	iuc 1	1	-	0	-	0	rmpA2_8*-60%	-	-	CTX-M-15	aac(3)-IIa.v1^;aac(6')-Ib-cr.v2;aadA	-	-	qnrB1.v2^	-	-	-	sul1	tet(A).v1	-	dfrA14.v2*	OXA-1	-	SHV-28^	-	-	-	GyrA-83I;ParC-80I	KL102	unknown (KL102)	-	Typeable	99.66%	-	O1/O2v2	O2afg	-	Typeable
516370	2016-05-04	Jordan	Unknown	ST307	yes	no	SAMN54588399	-	0	-	0	iuc 1	1	-	0	-	0	rmpA2_8*-60%	-	-	CTX-M-15	aac(3)-IIa.v1^;aac(6')-Ib-cr.v2;aadA^	-	-	qnrB1.v2^	-	-	-	sul1	tet(A).v1	-	dfrA14.v2*	OXA-1	-	SHV-28^	-	-	-	GyrA-83I;ParC-80I	KL102	unknown (KL102)	-	Typeable	99.66%	-	O1/O2v2	O2afg	-	Typeable
516404	2016-05-04	Jordan	Unknown	ST147	no	no	SAMN54588400	ybt 9; ICEKp3	173-2LV	-	0	-	0	-	0	-	0	-	-	NDM-1	CTX-M-15	aadA*;aph(3')-VI	-	-	qnrS1	-	-	arr-3	sul1	-	-	-	OXA-9.v1	-	SHV-11^	35Q	OmpK35-25%	-	GyrA-83I;ParC-80I	KL64	K64	-	Typeable	100.00%	-	O1/O2v1	O2a	-	Typeable
516422	2016-05-04	Jordan	Unknown	ST6	no	no	SAMN54588401	ybt 14; ICEKp5	376	-	0	-	0	-	0	-	0	-	-	-	CTX-M-15	strA.v1^;strB.v1	-	-	qnrS1	-	-	-	sul2	tet(A).v1	-	dfrA14.v2*	TEM-1D.v1^	-	SHV-1	-	-	-	-	KL7	K7	-	Typeable	99.51%	-	O1/O2v1	O1ab	-	Typeable
516431	2016-05-04	Jordan	Unknown	ST4422	no	no	SAMN54588402	-	0	-	0	-	0	-	0	-	0	-	-	-	CTX-M-15	aac(3)-IIa.v1^;aac(6')-Ib-cr.v2;strA.v1^;strB.v1	-	-	qnrB1.v2^	-	-	-	sul2	tet(A).v1	-	dfrA14.v2*	OXA-1;TEM-1D.v1^	-	SHV-11^	35Q	-	-	-	KL52	K52	?6	Typeable	99.82%	-	OL13	O13	?6+!	Typeable
516459	2016-05-04	Jordan	Unknown	ST147	no	no	SAMN54588403	ybt 9; ICEKp3	173-2LV	-	0	-	0	-	0	-	0	-	-	NDM-1	CTX-M-15	aadA*;aph(3')-VI	-	-	qnrS1	-	-	arr-3	sul1	-	-	-	OXA-9.v1	-	SHV-11^	35Q	OmpK35-25%	-	GyrA-83I;ParC-80I	KL64	K64	-	Typeable	100.00%	-	O1/O2v1	O2a	-	Typeable
516501	2016-05-04	Jordan	Unknown	ST16	no	no	SAMN54588404	ybt 10; ICEKp4	91-1LV	-	0	-	0	-	0	-	0	-	-	-	CTX-M-15	aadA2^	-	-	-	Mrx;mphA	-	-	sul1	-	-	dfrA12	-	-	SHV-1	-	-	-	GyrA-83F;GyrA-87N;ParC-84K	KL51	K51	-	Typeable	100.00%	-	O3b	O3b	-	Typeable
516529	2016-05-04	Jordan	Unknown	ST147	no	no	SAMN54588405	ybt 9; ICEKp3	173-2LV	-	0	-	0	-	0	-	0	-	-	NDM-1	CTX-M-15	aadA*;aph(3')-VI	-	-	qnrS1	-	-	arr-3	sul1	-	-	-	OXA-9.v1	-	SHV-11^	35Q	OmpK35-25%	-	GyrA-83I;ParC-80I	KL64	K64	-	Typeable	100.00%	-	O1/O2v1	O2a	-	Typeable
516608	2016-05-04	Jordan	Unknown	ST147	no	no	SAMN54588406	ybt 9; ICEKp3	173-2LV	-	0	-	0	-	0	-	0	-	-	-	-	-	-	-	-	-	-	-	-	-	-	-	-	-	SHV-11^	35Q	OmpK35-25%	-	GyrA-83I;ParC-80I	KL64	K64	-	Typeable	100.00%	-	O1/O2v1	O2a	-	Typeable
516635	2016-05-04	Jordan	Unknown	ST391	no	no	SAMN54588407	-	0	-	0	-	0	-	0	-	0	-	-	-	CTX-M-15	aac(3)-IIa.v1;strA.v1*;strB.v1*	-	-	qnrB1.v1	-	-	-	sul2	tet(D)^	-	dfrA14.v2*	TEM-1D.v1^	-	SHV-11^	35Q	-	-	-	KL30	K30	-	Typeable	97.45%	-	O1/O2v2	O1ab	-	Typeable
516653	2016-05-04	Jordan	Unknown	ST147	no	no	SAMN54588408	ybt 9; ICEKp3	173-2LV	-	0	-	0	-	0	-	0	-	-	-	-	-	-	-	-	-	-	-	-	-	-	-	-	-	SHV-11^	35Q	OmpK35-25%	-	GyrA-83I;ParC-80I	KL64	K64	-	Typeable	100.00%	-	O1/O2v1	O2a	-	Typeable
516662	2016-05-04	Jordan	Unknown	ST147	no	no	SAMN54588409	ybt 9; ICEKp3	173-2LV	-	0	-	0	-	0	-	0	-	-	NDM-1	CTX-M-15	aadA*;aph(3')-VI	-	-	qnrS1	-	-	arr-3	sul1	-	-	-	OXA-9.v1	-	SHV-11^	35Q	OmpK35-25%	-	GyrA-83I;ParC-80I	KL64	K64	-	Typeable	100.00%	-	O1/O2v1	O2a	-	Typeable
516714	2016-05-04	Jordan	Unknown	ST15	no	no	SAMN54588410	ybt 10; ICEKp4	28	-	0	-	0	-	0	-	0	-	-	OXA-48	CTX-M-55	aac(3)-IIa.v1^;aac(6')-Ib-cr.v2;strA.v1^;strB.v1	-	-	-	-	floR.v1*	-	sul2	tet(A).v1	-	-	OXA-1	-	SHV-28^	-	OmpK35-0%	-	ParC-80I	KL24	K24	!	Typeable	99.20%	-	O1/O2v1	O1ab	-	Typeable
516732	2016-05-04	Jordan	Unknown	ST2425	no	no	SAMN54588411	-	0	-	0	-	0	-	0	-	0	-	-	-	-	-	-	-	-	-	-	-	-	-	-	-	-	-	SHV-11^	35Q	-	-	-	KL7	K7	?3+	Typeable	99.56%	-	O3b	O3b	?3	Typeable
516741	2016-05-04	Jordan	Unknown	ST147	no	no	SAMN54588412	ybt 9; ICEKp3	173-2LV	-	0	-	0	-	0	-	0	-	-	-	-	-	-	-	-	-	-	-	-	-	-	-	-	-	SHV-11^	35Q	OmpK35-25%	-	GyrA-83I;ParC-80I	KL64	K64	-	Typeable	100.00%	-	O1/O2v1	O2a	-	Typeable
516802	2016-05-04	Jordan	Unknown	ST45	no	no	SAMN54588413	ybt 10; ICEKp4	78	-	0	-	0	-	0	-	0	-	-	-	-	-	-	-	-	-	-	-	-	tet(D)	-	-	-	-	SHV-1	-	-	-	-	KL43	K43	-	Typeable	99.73%	-	O1/O2v1	O2a	-	Typeable
516893	2016-05-04	Jordan	Unknown	ST38	no	no	SAMN54588414	-	0	-	0	-	0	-	0	-	0	-	-	NDM-1	CTX-M-15	aadA*	-	-	qnrS1	-	-	-	-	-	-	-	-	-	SHV-11^	35Q	OmpK35-21%	-	GyrA-83F;GyrA-87A;ParC-80I	KL52	K52	?3	Typeable	99.92%	-	OL13	O13	?3!	Typeable
517014	2016-05-04	Jordan	Unknown	ST20	no	no	SAMN54588415	-	0	-	0	-	0	-	0	-	0	-	-	-	-	aac(3)-IId^;aac(6')-Ib-cr.v2^;aadA16*;aph3-Ia.v1;strA.v1;strB.v1	-	-	qnrB2.v2^;qnrS1	Mrx;mphA	catB3.v2;floR.v1	arr-3	sul1	tet(A).v1?	-	dfrA27	OXA-1	-	SHV-187	-	-	-	-	KL28	K28	-	Typeable	99.75%	-	O1/O2v2	O1ab	-	Typeable
517023	2016-05-04	Jordan	Unknown	ST14	no	no	SAMN54588416	ybt 10; ICEKp4	107	-	0	-	0	-	0	-	0	-	-	-	CTX-M-15	aac(6')-Ib-cr.v2;strA.v1^;strB.v1	-	-	qnrB1.v2^	-	-	-	sul2	tet(A).v1	-	dfrA14.v2*	OXA-1	-	SHV-100	-	-	-	-	KL16	K16	-	Typeable	99.74%	-	O1/O2v1	O1ab	-	Typeable
517078	2016-05-04	Jordan	Unknown	ST405	no	no	SAMN54588417	ybt 27; ICEKp22	312	-	0	-	0	-	0	-	0	-	-	-	CTX-M-15	aac(3)-IIa.v1^;aac(6')-Ib-cr.v2;strA.v1^;strB.v1	-	-	qnrB1.v2^	-	-	-	sul2	tet(A).v1	-	dfrA14.v2*	OXA-1;TEM-1D.v1^	-	SHV-76	35Q	-	-	-	KL151	unknown (KL151)	-	Typeable	99.67%	-	O4	O4	-	Typeable
517087	2016-05-04	Jordan	Unknown	ST405	no	no	SAMN54588418	ybt 27; ICEKp22	312	-	0	-	0	-	0	-	0	-	-	-	CTX-M-15	aac(3)-IIa.v1^;aac(6')-Ib-cr.v2;strA.v1^;strB.v1	-	-	qnrB1.v2^	-	-	-	sul2	tet(A).v1	-	dfrA14.v2*	OXA-1;TEM-1D.v1^	-	SHV-76	35Q	-	-	-	KL151	unknown (KL151)	-	Typeable	99.67%	-	O4	O4	-	Typeable
517096	2016-05-04	Jordan	Unknown	ST405	no	no	SAMN54588419	ybt 27; ICEKp22	312	-	0	-	0	-	0	-	0	-	-	-	CTX-M-15	aac(3)-IIa.v1^;aac(6')-Ib-cr.v2;strA.v1^;strB.v1	-	-	qnrB1.v2^	-	-	-	sul2	tet(A).v1	-	dfrA14.v2*	OXA-1;TEM-1D.v1^	-	SHV-76	35Q	-	-	-	KL151	unknown (KL151)	-	Typeable	99.67%	-	O4	O4	-	Typeable
517111	2016-05-04	Jordan	Unknown	ST405	no	no	SAMN54588420	ybt 27; ICEKp22	312	-	0	-	0	-	0	-	0	-	-	-	CTX-M-15	aac(3)-IIa.v1^;aac(6')-Ib-cr.v2;strA.v1^;strB.v1	-	-	qnrB1.v2^	-	-	-	sul2	tet(A).v1	-	dfrA14.v2*	OXA-1;TEM-1D.v1^	-	SHV-76	35Q	-	-	-	KL151	unknown (KL151)	-	Typeable	99.67%	-	O4	O4	-	Typeable
517139	2016-05-04	Jordan	Unknown	ST20	no	no	SAMN54588421	-	0	-	0	-	0	-	0	-	0	-	-	-	-	aac(3)-IId^;aac(6')-Ib-cr.v2^;aadA16*;aph3-Ia.v1;strA.v1;strB.v1	-	-	qnrB2.v2^;qnrS1	Mrx;mphA	catB3.v2;floR.v1	arr-3	sul1	tet(A).v1?	-	dfrA27	OXA-1	-	SHV-187	-	-	-	-	KL28	K28	-	Typeable	99.75%	-	O1/O2v2	O1ab	-	Typeable
517148	2016-05-04	Jordan	Unknown	ST873	no	no	SAMN54588422	ybt 8; ICEKp9	554	-	0	-	0	-	0	-	0	-	-	-	CTX-M-15	aac(3)-IIa.v1^;aac(6')-Ib-cr.v2;strA.v1^;strB.v1	-	-	qnrB1.v2^	-	-	-	sul2	tet(A).v1	-	dfrA14.v2*	OXA-1^;TEM-1D.v1^	-	SHV-27^	156D	-	-	-	KL52	K52	?3	Typeable	99.93%	-	OL13	O13	?4	Typeable
517193	2016-05-04	Jordan	Unknown	ST1241	no	no	SAMN54588423	ybt 14; ICEKp5	354-5LV	-	0	-	0	-	0	-	0	-	-	-	-	-	-	-	-	-	-	-	-	-	-	-	-	-	SHV-1	-	-	-	-	KL7	K7	-	Typeable	99.53%	-	O1/O2v2	O2afg	-	Typeable
517209	2016-05-04	Jordan	Unknown	ST101	no	no	SAMN54588424	ybt 9; ICEKp3	183-1LV	-	0	-	0	-	0	-	0	-	-	OXA-48	CTX-M-14^	aac(3)-IIa.v1^;aadA*;aadA2;aph(3')-VIb*;strA.v1	-	-	-	Mrx;mphA	cmlA1*;floR.v1*	-	sul3	tet(D)	-	dfrA14.v2*	OXA-9.v1	-	SHV-1^	-	OmpK35-17%;OmpK36GD	-	GyrA-83Y;GyrA-87N;ParC-80I	KL17	K17	-	Typeable	99.97%	-	O1/O2v1	O1ab	-	Typeable
517254	2016-05-04	Jordan	Unknown	ST231	no	no	SAMN54588425	-	0	-	0	-	0	-	0	-	0	-	-	-	CTX-M-27	aac(3)-IId*;aadA2^;aadA^;aph3-Ia.v1^	-	-	qnrB2.v2^	Mrx;mphA	-	arr-3	sul1	tet(A).v1	-	dfrA12;dfrA27	TEM-1D.v1^	-	SHV-1^	-	-	-	GyrA-83I;ParC-80I	KL51	K51	?3!	Typeable	99.72%	-	O1/O2v2	O1ab	-	Typeable
517281	2016-05-04	Jordan	Unknown	ST147	no	no	SAMN54588426	-	0	-	0	-	0	-	0	-	0	-	-	NDM-5;OXA-181	CTX-M-15	aac(6')-Ib*;aadA2^, rmtF	-	-	qnrB1.v2^	-	catII.2*	arr-2	sul1	-	-	dfrA12	-	-	SHV-11^	35Q	OmpK35-76%;OmpK36TD	-	GyrA-83I;ParC-80I	KL64	K64	-	Typeable	100.00%	-	O1/O2v1	O2a	-	Typeable
517290	2016-05-04	Jordan	Unknown	ST231	no	no	SAMN54588427	-	0	-	0	-	0	-	0	-	0	-	-	-	-	aac(3)-IId*;aac(6')-Ib-cr.v2;aadA16*;aadA2^;aadA^;aph3-Ia.v1^	-	-	qnrB2.v2^	Mrx;mphA	-	arr-3	sul1	tet(A).v1	-	dfrA12;dfrA27	TEM-1D.v1^	-	SHV-1^	-	-	-	GyrA-83I;ParC-80I	KL51	K51	?3!	Typeable	99.72%	-	O1/O2v2	O1ab	-	Typeable
517306	2016-05-04	Jordan	Unknown	ST231	no	no	SAMN54588428	-	0	-	0	-	0	-	0	-	0	-	-	-	-	aac(3)-IId*;aadA2^;aadA^;aph3-Ia.v1^	-	-	qnrB2.v2^	Mrx;mphA	-	arr-3	sul1	tet(A).v1	-	dfrA12;dfrA27	TEM-1D.v1^	-	SHV-1^	-	-	-	GyrA-83I;ParC-80I	KL51	K51	?3!	Typeable	99.72%	-	O1/O2v2	O1ab	-	Typeable
517315	2016-05-04	Jordan	Unknown	ST231	no	no	SAMN54588429	-	0	-	0	-	0	-	0	-	0	-	-	-	-	aac(3)-IId*;aadA2^;aadA^;aph3-Ia.v1^	-	-	qnrB2.v2^	Mrx;mphA	-	arr-3	sul1	tet(A).v1	-	dfrA12;dfrA27	TEM-1D.v1^	-	SHV-1^	-	-	-	GyrA-83I;ParC-80I	KL51	K51	?3!	Typeable	99.72%	-	O1/O2v2	O1ab	-	Typeable
517333	2016-05-04	Jordan	Unknown	ST36	no	no	SAMN54588430	ybt 9; ICEKp3	183-1LV	-	0	-	0	-	0	-	0	-	-	-	-	-	-	-	-	-	-	-	-	-	-	-	-	-	SHV-11^	35Q	-	-	-	KL27	K27	-	Typeable	99.97%	-	O1/O2v2	O2afg	-	Typeable
517342	2016-05-04	Jordan	Unknown	ST147	no	no	SAMN54588431	-	0	-	0	-	0	-	0	-	0	-	-	NDM-5;OXA-181	CTX-M-15	aac(6')-Ib*;aadA2^, rmtF	-	-	qnrB1.v2^	-	catII.2*	arr-2	sul1	-	-	dfrA12	-	-	SHV-11^	35Q	OmpK35-76%;OmpK36TD	-	GyrA-83I;ParC-80I	KL64	K64	-	Typeable	100.00%	-	O1/O2v1	O2a	-	Typeable
517351	2016-05-04	Jordan	Unknown	ST1399	no	no	SAMN54588432	ybt 14; ICEKp5	145-2LV	-	0	-	0	-	0	-	0	-	-	-	CTX-M-15;SHV-12^	ant(2'')-Ia;strA.v1^;strB.v1	-	-	qnrS1	-	cmlA5	-	sul1;sul2^	-	-	-	-	-	-	238S;240K;35Q	OmpK35-59%	-	GyrA-83Y	KL43	K43	?2	Typeable	99.97%	-	O1/O2v1	O2ac	-	Typeable
517360	2016-05-04	Jordan	Unknown	ST1399	no	no	SAMN54588433	ybt 14; ICEKp5	145-2LV	-	0	-	0	-	0	-	0	-	-	-	CTX-M-15;SHV-12^	aac(6')-Ib'.v1;ant(2'')-Ia;strA.v1^;strB.v1	-	-	qnrS1	-	cmlA5	-	sul1;sul2^	-	-	-	TEM-1D.v1^	-	-	238S;240K;35Q	OmpK35-59%	-	GyrA-83Y	KL43	K43	?2	Typeable	99.97%	-	O1/O2v1	O2ac	-	Typeable
517421	2014-12-15	Jordan	Unknown	ST101	no	no	SAMN54588434	ybt 9; ICEKp3	183-2LV	-	0	-	0	-	0	-	0	-	-	OXA-48	CTX-M-14^	strA.v1	-	-	-	-	-	-	-	-	-	dfrA14.v2*	-	-	SHV-1^	-	OmpK35-17%;OmpK36GD	-	GyrA-83Y;GyrA-87N;ParC-80I	KL17	K17	-	Typeable	99.94%	-	O1/O2v1	O1ab	-	Typeable
517485	2014-12-15	Jordan	Unknown	ST1399	yes	yes	SAMN54588435	ybt 14; ICEKp5 (truncated)	145-3LV	-	0	iuc 1	63	-	0	-	0	rmpA2 ONT call	-	-	CTX-M-15;SHV-12	aac(6')-Ib'.v1;ant(2'')-Ia;strA.v1^;strB.v1	-	-	qnrS1	-	cmlA5	-	sul1;sul2^	-	-	dfrA7	TEM-1D.v1^	-	SHV-11^	35Q	OmpK35-59%	-	GyrA-83Y	KL43	K43	-	Typeable	99.97%	-	O1/O2v1	O2ac	-	Typeable
517698	2016-05-04	Jordan	Unknown	ST14	no	no	SAMN54588436	-	0	-	0	-	0	-	0	-	0	-	-	-	CTX-M-15	aac(3)-IIa.v1^;aac(6')-Ib-cr.v2;strA.v1^;strB.v1	-	-	qnrB1.v2^	-	-	-	sul2	tet(A).v1	-	dfrA14.v2*	OXA-1;TEM-1D.v1^	-	SHV-28^	-	-	-	-	KL2	K2	-	Typeable	99.83%	-	O1/O2v1	O1ab	-	Typeable
517829	2016-05-04	Jordan	Unknown	ST16	no	no	SAMN54588437	ybt 10; ICEKp4 (truncated)	91-4LV	-	0	-	0	-	0	-	0	-	-	-	CTX-M-15	aadA2^	-	-	-	Mrx;mphA	-	-	sul1	-	-	dfrA12	TEM-1D.v1^	-	SHV-1	-	-	-	GyrA-83F;GyrA-87N;ParC-84K	KL51	K51	-	Typeable	99.97%	-	O3b	O3b	-	Typeable
517856	2016-05-04	Jordan	Unknown	ST16	no	no	SAMN54588438	ybt 10; ICEKp4 (truncated)	91-4LV	-	0	-	0	-	0	-	0	-	-	-	CTX-M-15	aadA2^	-	-	-	Mrx;mphA	-	-	sul1	-	-	dfrA12	TEM-1D.v1^	-	SHV-1	-	-	-	GyrA-83F;GyrA-87N;ParC-84K	KL51	K51	-	Typeable	99.97%	-	O3b	O3b	-	Typeable
517865	2016-05-04	Jordan	Unknown	ST16	no	no	SAMN54588439	ybt 10; ICEKp4 (truncated)	91-4LV	-	0	-	0	-	0	-	0	-	-	-	CTX-M-15	aac(6')-Ib-cr.v2;aadA2^	-	-	-	Mrx;mphA	CatB4.v1	-	sul1	tet(A).v1	-	dfrA12	OXA-1;TEM-1D.v1^	-	SHV-1	-	-	-	GyrA-83F;GyrA-87N;ParC-84K	KL51	K51	!	Typeable	99.97%	-	O3b	O3b	-	Typeable
517874	2016-05-04	Jordan	Unknown	ST1399	no	no	SAMN54588440	ybt 14; ICEKp5	145-2LV	-	0	-	0	-	0	-	0	-	-	-	CTX-M-15; SHV-12	aac(6')-Ib'.v1;ant(2'')-Ia;strA.v1^;strB.v1	-	-	qnrS1	-	cmlA5	-	sul1;sul2^	-	-	-	TEM-1D.v1^	-	SHV-11^	35Q	OmpK35-59%	-	GyrA-83Y	KL43	K43	?2	Typeable	99.97%	-	O1/O2v1	O2ac	-	Typeable
518110	2016-05-04	Jordan	Unknown	ST3248	no	no	SAMN54588441	-	0	-	0	-	0	-	0	-	0	-	-	-	CTX-M-15	aac(3)-IIa.v1^;aac(6')-Ib-cr.v2;strA.v1^;strB.v1	-	-	qnrB1.v2^	-	-	-	sul2	tet(A).v1	-	dfrA14.v2*	OXA-1;TEM-1D.v1^	-	SHV-28^	-	-	-	GyrA-83I;ParC-80I	KL102	unknown (KL102)	-	Typeable	99.66%	-	O1/O2v2	O2afg	-	Typeable
518147	2016-05-04	Jordan	Unknown	ST1119	no	no	SAMN54588442	-	0	-	0	-	0	-	0	-	0	-	-	NDM-1	CTX-M-15	aac(3)-IIa.v1^;aac(3)-IIg;aac(6')-IIc;aadA*;aph(3')-VI	-	-	qnrB4;qnrS1	-	catA1^	-	sul1^	tet(A).v1	-	dfrA30*	DHA-25;OXA-1^;OXA-9.v1	-	SHV-11^	35Q	-	-	-	KL110	unknown (KL110)	?3	Typeable	99.62%	-	O3b	O3b	?4	Typeable
518156	2016-05-04	Jordan	Human	ST11	no	no	SAMN54588443	ybt 9; ICEKp3	183	-	0	-	0	-	0	-	0	-	-	NDM-1	-	aac(3)-IIa.v1^;aac(6')-Ib-cr.v1^, rmtF	-	-	-	-	-	arr-2	-	-	-	-	OXA-1	-	SHV-11	35Q	-	-	GyrA-83I;ParC-80I	KL15	K15	-	Typeable	99.92%	-	O4	O4	?2	Typeable
518183	2016-05-04	Jordan	Human	ST11	no	no	SAMN54588444	ybt 9; ICEKp3	183	-	0	-	0	-	0	-	0	-	-	NDM-1	-	aac(3)-IIa.v1^, rmtF	-	-	-	-	-	arr-2	-	-	-	-	OXA-1	-	SHV-11	35Q	-	-	GyrA-83I;ParC-80I	KL15	K15	?2	Typeable	99.92%	-	O4	O4	?2	Typeable
518226	2016-05-04	Jordan	Unknown	ST22	no	no	SAMN54588445	-	0	-	0	-	0	-	0	-	0	-	-	-	CTX-M-14^;CTX-M-15	aac(3)-IIa.v1^;aac(6')-Ib-cr.v2;aph(3')-VIb*;aph3-Ia.v1*;strA.v1	-	-	qnrB1.v2^	-	-	-	-	tet(D)	-	dfrA14.v2*	OXA-1	-	SHV-1^	-	-	-	-	KL9	K9	-	Typeable	99.99%	-	O1/O2v2	O2afg	-	Typeable
518235	2016-05-04	Jordan	Unknown	ST22	no	no	SAMN54588446	-	0	-	0	-	0	-	0	-	0	-	-	-	CTX-M-14^;CTX-M-15	aac(3)-IIa.v1^;aac(6')-Ib-cr.v2;aph(3')-VIb*;aph3-Ia.v1*;strA.v1	-	-	qnrB1.v2^	-	-	-	-	tet(D)	-	dfrA14.v2*	OXA-1	-	SHV-1^	-	-	-	-	KL9	K9	-	Typeable	99.99%	-	O1/O2v2	O2afg	-	Typeable
518244	2016-05-04	Jordan	Unknown	ST22	no	no	SAMN54588447	-	0	-	0	-	0	-	0	-	0	-	-	-	CTX-M-14^;CTX-M-15	aac(3)-IIa.v1^;aac(6')-Ib-cr.v2;aph(3')-VIb*;aph3-Ia.v1*;strA.v1	-	-	qnrB1.v2^	-	-	-	-	tet(D)	-	dfrA14.v2*	OXA-1	-	SHV-1^	-	-	-	-	KL9	K9	-	Typeable	99.99%	-	O1/O2v2	O2afg	-	Typeable
518253	2016-05-04	Jordan	Unknown	ST22	no	no	SAMN54588448	-	0	-	0	-	0	-	0	-	0	-	-	-	CTX-M-14^;CTX-M-15	aac(3)-IIa.v1^;aac(6')-Ib-cr.v2;aph(3')-VIb*;aph3-Ia.v1*;strA.v1	-	-	qnrB1.v2^	-	-	-	-	tet(D)	-	dfrA14.v2*	OXA-1	-	SHV-1^	-	-	-	-	KL9	K9	-	Typeable	99.99%	-	O1/O2v2	O2afg	-	Typeable
518369	2016-05-04	Jordan	Unknown	ST2534	no	no	SAMN54588449	ybt 9; ICEKp12	210-1LV	-	0	-	0	-	0	-	0	-	-	-	CTX-M-15	strA.v1^;strB.v1	-	-	-	-	-	-	sul2	tet(D)	-	dfrA14.v2*	TEM-1D.v1^	-	SHV-1*	-	-	-	-	KL62	K62	-	Typeable	99.96%	-	O1/O2v1	O1ab	-	Typeable
518457	2014-12-15	Jordan	Unknown	ST1399	yes	no	SAMN54588450	ybt 14; ICEKp5	145-2LV	-	0	iuc 1	63	-	0	-	0	-	-	-	CTX-M-15	aac(6')-Ib'.v1;ant(2'')-Ia;strA.v1^;strB.v1	-	-	qnrS1	-	cmlA5	-	sul1;sul2^	-	-	dfrA7	TEM-1D.v1^	-	SHV-11^	35Q	OmpK35-59%	-	GyrA-83Y	KL43	K43	-	Typeable	99.97%	-	O1/O2v1	O2ac	-	Typeable
518475	2014-12-15	Jordan	Unknown	ST101	no	no	SAMN54588451	ybt 9; ICEKp3	183-2LV	-	0	-	0	-	0	-	0	-	-	-	-	-	-	-	-	-	-	-	-	-	-	dfrA14.v2*	-	-	SHV-1^	-	OmpK35-17%;OmpK36GD	-	GyrA-83Y;GyrA-87N;ParC-80I	KL17	K17	-	Typeable	99.94%	-	O1/O2v1	O1ab	-	Typeable
518484	2014-12-15	Jordan	Unknown	ST1399	yes	no	SAMN54588452	ybt 14; ICEKp5	145-2LV	-	0	iuc 1	63	-	0	-	0	-	-	-	CTX-M-15;SHV-12^	ant(2'')-Ia;strA.v1^;strB.v1	-	-	qnrS1	-	cmlA5	-	sul1;sul2^	-	-	dfrA7	-	-	-	238S;240K;35Q	OmpK35-59%	-	GyrA-83Y	KL43	K43	-	Typeable	99.97%	-	O1/O2v1	O2ac	-	Typeable
518563	2014-12-15	Jordan	Unknown	ST14	no	no	SAMN54588453	-	0	-	0	-	0	-	0	-	0	-	-	-	CTX-M-15	strA.v1^;strB.v1	-	-	qnrB1.v2^	-	-	-	sul2	tet(A).v1	-	dfrA14.v2*	-	-	SHV-28^	-	-	-	-	KL2	K2	-	Typeable	99.84%	-	O1/O2v1	O1ab	-	Typeable
518590	2014-12-15	Jordan	Unknown	ST14	no	no	SAMN54588454	-	0	-	0	-	0	-	0	-	0	-	-	-	CTX-M-15	strA.v1^;strB.v1	-	-	qnrB1.v2^	-	-	-	sul2	tet(A).v1	-	dfrA14.v2*	-	-	SHV-28^	-	-	-	-	KL2	K2	-	Typeable	99.84%	-	O1/O2v1	O1ab	-	Typeable
518624	2016-05-04	Jordan	Human	ST11	no	no	SAMN54588455	ybt 9; ICEKp3	183	-	0	-	0	-	0	-	0	-	-	NDM-1	-	aac(3)-IIa.v1^;aph3-Ia.v1^, rmtF	-	-	qnrS1	Mrx;mphA	-	arr-2	-	-	-	-	OXA-1	-	-	-	-	-	GyrA-83I;ParC-80I	KL15	K15	-	Typeable	99.92%	-	O4	O4	-	Typeable
518633	2016-05-04	Jordan	Human	ST11	no	no	SAMN54588456	ybt 9; ICEKp3	183	-	0	-	0	-	0	-	0	-	-	NDM-1	-	aac(3)-IIa.v1^;aph3-Ia.v1^	-	-	qnrS1	Mrx;mphA	-	arr-2	-	-	-	-	OXA-1	-	SHV-11^	35Q	-	-	GyrA-83I;ParC-80I	KL15	K15	-	Typeable	99.92%	-	O4	O4	-	Typeable
518651	2016-05-04	Jordan	Unknown	ST6498	no	no	SAMN54588457	ybt 4; plasmid	375-1LV	-	0	-	0	-	0	-	0	-	-	-	-	-	-	-	-	-	-	-	-	-	-	-	-	-	SHV-75*	-	-	-	-	KL25	K25	!	Typeable	99.71%	-	O1/O2v1	O1ab	-	Typeable
518703	2016-05-04	Jordan	Unknown	ST43	no	no	SAMN54588458	-	0	-	0	-	0	-	0	-	0	-	-	-	CTX-M-15	strA.v1^;strB.v1	-	-	qnrB1.v2^	-	-	-	sul2	-	-	dfrA14.v2*	TEM-1D.v1^	-	SHV-11^	35Q	-	-	-	KL61	K61	-	Typeable	98.31%	-	O1/O2v1	O1ab	-	Typeable
518712	2016-05-04	Jordan	Unknown	ST43	no	no	SAMN54588459	-	0	-	0	-	0	-	0	-	0	-	-	-	CTX-M-15	strA.v1^;strB.v1	-	-	qnrB1.v2^	-	-	-	sul2	-	-	dfrA14.v2*	TEM-1D.v1^	-	SHV-11^	35Q	-	-	-	KL61	K61	-	Typeable	98.31%	-	O1/O2v1	O1ab	-	Typeable
518749	2016-05-04	Jordan	Unknown	ST22	no	no	SAMN54588460	-	0	-	0	-	0	-	0	-	0	-	-	-	CTX-M-14^;CTX-M-15	aac(3)-IIa.v1^;aac(6')-Ib-cr.v2;aph(3')-VIb*;aph3-Ia.v1*;strA.v1	-	-	qnrB1.v2^	-	-	-	-	tet(D)	-	dfrA14.v2*	OXA-1	-	SHV-1^	-	-	-	-	KL9	K9	-	Typeable	99.99%	-	O1/O2v2	O2afg	-	Typeable
518758	2016-05-04	Jordan	Unknown	ST22	no	no	SAMN54588461	-	0	-	0	-	0	-	0	-	0	-	-	-	CTX-M-14^;CTX-M-15	aac(3)-IIa.v1^;aac(6')-Ib-cr.v2;aph(3')-VIb*;aph3-Ia.v1*;strA.v1	-	-	qnrB1.v2^	-	-	-	sul1*	tet(D)	-	dfrA14.v2*	OXA-1	-	SHV-1^	-	-	-	-	KL9	K9	-	Typeable	99.99%	-	O1/O2v2	O2afg	-	Typeable
518767	2016-05-04	Jordan	Unknown	ST43	no	no	SAMN54588462	-	0	-	0	-	0	-	0	-	0	-	-	-	CTX-M-15	strA.v1^;strB.v1	-	-	qnrB1.v2^	-	-	-	sul2	-	-	dfrA14.v2*	TEM-1D.v1^	-	SHV-11^	35Q	-	-	-	KL61	K61	-	Typeable	98.31%	-	O1/O2v1	O1ab	-	Typeable
518776	2016-05-04	Jordan	Unknown	ST43	no	no	SAMN54588463	-	0	-	0	-	0	-	0	-	0	-	-	-	CTX-M-15	strA.v1^;strB.v1	-	-	qnrB1.v2^	-	-	-	sul2	-	-	dfrA14.v2*	TEM-1D.v1^	-	SHV-11^	35Q	-	-	-	KL61	K61	-	Typeable	98.31%	-	O1/O2v1	O1ab	-	Typeable
518785	2016-05-04	Jordan	Unknown	ST22	no	no	SAMN54588464	-	0	-	0	-	0	-	0	-	0	-	-	-	CTX-M-14^;CTX-M-15	aac(3)-IIa.v1^;aac(6')-Ib-cr.v2;aph(3')-VIb*;aph3-Ia.v1*;strA.v1	-	-	qnrB1.v2^	-	-	-	-	tet(D)	-	dfrA14.v2*	OXA-1	-	SHV-1^	-	-	-	-	KL9	K9	-	Typeable	99.99%	-	O1/O2v2	O2afg	-	Typeable
518891	2016-05-04	Jordan	Unknown	ST320	no	no	SAMN54588465	ybt 4; plasmid	31	-	0	-	0	-	0	-	0	-	-	-	-	-	-	-	-	-	-	-	-	-	-	-	-	-	SHV-11^	35Q	-	-	-	KL9	K9	-	Typeable	99.95%	-	O1/O2v2	O1ab	-	Typeable
518961	2016-05-04	Jordan	Unknown	ST37	no	no	SAMN54588467	-	0	-	0	-	0	-	0	-	0	-	-	-	CTX-M-27;SHV-12	aac(3)-IV;aac(6')-Ib-cr.v2;aadA16*;aph(4)-Ia;armA	-	-	qnrB4	Mrx;mphA;mphE.v2;msrE	floR.v1*	arr-3	sul1	tet(D)	-	dfrA27	DHA-1	-		35Q	-	-	GyrA-83I;ParC-80I	KL38	K38	-	Typeable	99.86%	-	O3b	O3b	-	Typeable
518970	2016-05-04	Jordan	Unknown	ST22-3LV	no	no	SAMN54588468	-	0	-	0	-	0	-	0	-	0	-	-	-	-	-	-	-	qnrB4	Mrx;mphA	-	-	sul1	-	-	dfrA17	DHA-1	-	SHV-93^	156D;35Q	-	-	-	KL112	unknown (KL112)	-	Typeable	99.54%	-	O1/O2v2	O2afg	-	Typeable
518998	2016-05-04	Jordan	Unknown	ST2201	no	no	SAMN54588469	-	0	-	0	-	0	-	0	-	0	-	-	-	-	-	-	-	-	-	-	-	-	-	-	-	-	-	SHV-11^	35Q	-	-	-	KL57	K57	-	Typeable	99.94%	-	O3/O3a	O3/O3a	-	Typeable
519119	2014-12-15	Jordan	Unknown	ST37	no	no	SAMN54588470	ybt 9; ICEKp3	480-1LV	-	0	-	0	-	0	-	0	-	-	-	CTX-M-15	aac(3)-IIa.v1^;aac(6')-Ib-cr.v2;aph3-Ia.v1*	-	-	-	-	-	-	-	-	-	dfrA14.v2*	OXA-1	-	SHV-11^	35Q	-	-	-	KL15	K15	-	Typeable	99.84%	-	O4	O4	-	Typeable
519137	2014-12-15	Jordan	Unknown	ST101	no	no	SAMN54588471	ybt 9; ICEKp3	183-2LV	-	0	-	0	-	0	-	0	-	-	-	-	-	-	-	-	-	-	-	-	-	-	dfrA14.v2*	-	-	SHV-1^	-	OmpK35-17%;OmpK36GD	-	GyrA-83Y;GyrA-87N;ParC-80I	KL17	K17	-	Typeable	99.94%	-	O1/O2v1	O1ab	-	Typeable
519207	2014-12-15	Jordan	Unknown	ST14	no	no	SAMN54588472	-	0	-	0	-	0	-	0	-	0	-	-	-	CTX-M-15	aac(3)-IIa.v1^;aac(6')-Ib-cr.v2	-	-	qnrB1.v2^	-	-	-	-	tet(A).v1	-	dfrA14.v2*	OXA-1	-	SHV-28^	-	-	-	-	KL2	K2	-	Typeable	99.82%	-	O1/O2v1	O1ab	-	Typeable
519243	2016-05-04	Jordan	Unknown	ST147	no	no	SAMN54588473	ybt 9; ICEKp3	173-2LV	-	0	-	0	-	0	-	0	-	-	NDM-1	CTX-M-15	aac(6')-Ib'.v1;aac(6')-Ib-cr.v2;aadA*;aph(3')-VI	-	-	qnrS1	-	-	arr-3	sul1	-	-	-	OXA-9.v1;TEM-1D.v1^	-	SHV-11^	35Q	OmpK35-25%	-	GyrA-83I;ParC-80I	KL64	K64	-	Typeable	100.00%	-	O1/O2v1	O2a	-	Typeable
519313	2016-05-04	Jordan	Unknown	ST147	no	no	SAMN54588474	ybt 9; ICEKp3	173-2LV	-	0	-	0	-	0	-	0	-	-	NDM-1	CTX-M-15	aac(6')-Ib'.v1;aac(6')-Ib-cr.v2;aadA*;aph(3')-VI	-	-	qnrS1	-	-	arr-3	sul1	-	-	-	OXA-9.v1;TEM-1D.v1^	-	SHV-11^	35Q	OmpK35-25%	-	GyrA-83I;ParC-80I	KL64	K64	-	Typeable	100.00%	-	O1/O2v1	O2a	-	Typeable
519322	2016-05-04	Jordan	Unknown	ST37	no	no	SAMN54588475	-	0	-	0	-	0	-	0	-	0	-	-	-	CTX-M-27;SHV-12	aac(3)-IV;aac(6')-Ib-cr.v2;aadA16*;aph(4)-Ia;armA	-	-	qnrB4	Mrx;mphA;mphE.v2;msrE	floR.v1*	arr-3	sul1	tet(D)	-	dfrA27	DHA-1	-		35Q	-	MgrB-53%	GyrA-83I;ParC-80I	KL38	K38	-	Typeable	99.86%	-	O3b	O3b	-	Typeable
519359	2016-05-04	Jordan	Unknown	ST16	no	no	SAMN54588476	ybt 10; ICEKp4	91-1LV	-	0	-	0	-	0	-	0	-	-	-	CTX-M-15	aac(6')-Ib-cr.v2;aadA2^;aph3-Ia.v1^	-	-	-	Mrx;mphA	CatB4.v1	-	sul1	tet(A).v1	-	dfrA12	OXA-1;TEM-1D.v1^	-	SHV-1	-	-	-	GyrA-83F;GyrA-87N;ParC-84K	KL51	K51	-	Typeable	100.00%	-	O3b	O3b	-	Typeable
519386	2016-05-04	Jordan	Unknown	ST147	no	no	SAMN54588477	ybt 9; ICEKp3	173-2LV	-	0	-	0	-	0	-	0	-	-	NDM-1	CTX-M-15	aac(6')-Ib'.v1;aac(6')-Ib-cr.v2;aadA*;aph(3')-VI	-	-	qnrS1	-	-	arr-3	sul1	-	-	-	OXA-9.v1;TEM-1D.v1^	-	SHV-11^	35Q	OmpK35-25%	-	GyrA-83I;ParC-80I	KL64	K64	-	Typeable	100.00%	-	O1/O2v1	O2a	-	Typeable
520230	2016-05-04	Jordan	Unknown	ST22	no	no	SAMN54588478	-	0	-	0	-	0	-	0	-	0	-	-	-	CTX-M-14^;CTX-M-15	aac(3)-IIa.v1^;aac(6')-Ib-cr.v2;aph(3')-VIb*;aph3-Ia.v1*;strA.v1	-	-	qnrB1.v2^	-	-	-	-	tet(D)	-	dfrA14.v2*	OXA-1	-	SHV-1^	-	-	-	-	KL9	K9	?2	Typeable	99.99%	-	O1/O2v2	O2afg	-	Typeable
520249	2016-05-04	Jordan	Unknown	ST22	no	no	SAMN54588479	-	0	-	0	-	0	-	0	-	0	-	-	-	CTX-M-14^;CTX-M-15	aac(3)-IIa.v1^;aac(6')-Ib-cr.v2;aph(3')-VIb*;aph3-Ia.v1*;strA.v1	-	-	qnrB1.v2^	-	-	-	-	tet(D)	-	dfrA14.v2*	OXA-1	-	SHV-1^	-	-	-	-	KL9	K9	-	Typeable	99.99%	-	O1/O2v2	O2afg	-	Typeable
520258	2016-05-04	Jordan	Unknown	ST22	no	no	SAMN54588480	-	0	-	0	-	0	-	0	-	0	-	-	-	CTX-M-14^;CTX-M-15	aac(3)-IIa.v1^;aac(6')-Ib-cr.v2;aph(3')-VIb*;aph3-Ia.v1*;strA.v1	-	-	qnrB1.v2^	-	-	-	-	tet(D)	-	dfrA14.v2*	OXA-1	-	SHV-1^	-	-	-	-	KL9	K9	-	Typeable	99.99%	-	O1/O2v2	O2afg	-	Typeable
520328	2016-05-04	Jordan	Unknown	ST22	no	no	SAMN54588481	-	0	-	0	-	0	-	0	-	0	-	-	-	CTX-M-14^;CTX-M-15	aac(3)-IIa.v1^;aac(6')-Ib-cr.v2;aph(3')-VIb*;aph3-Ia.v1*;strA.v1	-	-	qnrB1.v2^	-	-	-	-	tet(D)	-	dfrA14.v2*	OXA-1	-	SHV-1^	-	-	-	-	KL9	K9	-	Typeable	99.99%	-	O1/O2v2	O2afg	-	Typeable
520337	2016-05-04	Jordan	Unknown	ST22	no	no	SAMN54588482	-	0	-	0	-	0	-	0	-	0	-	-	-	CTX-M-14^;CTX-M-15	aac(3)-IIa.v1^;aac(6')-Ib-cr.v2;aph(3')-VIb*;aph3-Ia.v1*;strA.v1	-	-	qnrB1.v2^	-	-	-	-	tet(D)	-	dfrA14.v2*	OXA-1	-	SHV-1^	-	-	-	-	KL9	K9	-	Typeable	99.99%	-	O1/O2v2	O2afg	-	Typeable
520346	2016-05-04	Jordan	Unknown	ST147	no	no	SAMN54588483	ybt 10; ICEKp4	384	-	0	-	0	-	0	-	0	-	-	NDM-1;OXA-48	CTX-M-15	aac(3)-IIa.v1^;aph3-Ia.v1^;strA.v1;strB.v1, rmtF	-	-	-	Mrx;mphA	catII.2*	arr-2	-	-	-	dfrA12	OXA-1	-	SHV-11^	35Q	OmpK35-76%	-	GyrA-83I;ParC-80I	KL64	K64	-	Typeable	100.00%	-	O1/O2v1	O2a	-	Typeable
520355	2016-05-04	Jordan	Unknown	ST484-2LV	no	no	SAMN54588484	-	0	-	0	-	0	-	0	-	0	-	-	-	-	-	-	-	-	-	-	-	-	-	-	-	-	-	SHV-103*	35Q	-	-	-	KL103	unknown (KL103)	-	Typeable	98.92%	-	O1/O2v1	O1ab	-	Typeable
520364	2016-05-04	Jordan	Unknown	ST22	no	no	SAMN54588485	-	0	-	0	-	0	-	0	-	0	-	-	-	CTX-M-14^;CTX-M-15	aac(3)-IIa.v1^;aac(6')-Ib-cr.v2;aph(3')-VIb*;aph3-Ia.v1*;strA.v1	-	-	qnrB1.v2^	-	-	-	-	tet(D)	-	dfrA14.v2*	OXA-1	-	SHV-1^	-	-	-	-	KL9	K9	-	Typeable	99.99%	-	O1/O2v2	O2afg	-	Typeable
520373	2016-05-04	Jordan	Unknown	ST22	no	no	SAMN54588486	-	0	-	0	-	0	-	0	-	0	-	-	-	CTX-M-14^;CTX-M-15	aac(3)-IIa.v1^;aac(6')-Ib-cr.v2;aph(3')-VIb*;aph3-Ia.v1*;strA.v1	-	-	qnrB1.v2^	-	-	-	-	tet(D)	-	dfrA14.v2*	OXA-1	-	SHV-1^	-	-	-	-	KL9	K9	-	Typeable	99.99%	-	O1/O2v2	O2afg	-	Typeable
523680	2014-12-15	Jordan	Unknown	ST278	no	no	SAMN54588487	-	0	-	0	-	0	-	0	-	0	-	-	-	CTX-M-15;SHV-2^	strA.v1^;strB.v1	-	-	qnrB1.v2^;qnrS1	-	-	-	sul2	tet(A).v1	-	dfrA14.v2*	TEM-1D.v1^	-	-	238S	-	-	-	KL136	unknown (KL136)	-	Typeable	99.61%	-	O1/O2v2	O2afg	-	Typeable
101985	2021-09-14	Kenya	Wound	ST3717	no	no	SAMN54588079	ybt 10; ICEKp4	107-1LV	-	0	-	0	-	0	-	0	-	-	-	CTX-M-15	strA.v1*;strB.v1*	-	-	qnrB6^	-	catII.2*	arr-3	sul1;sul2	-	-	dfrA27	TEM-1D.v1^	-	SHV-1^	-	OmpK36-20%	-	-	KL57	Capsule null	!	Typeable	98.05%	-	O1/O2v2	O1ab	!	Typeable
101999	2021-06-10	Kenya	Wound	ST1307	no	no	SAMN54588080	-	0	-	0	-	0	-	0	-	0	-	-	-	CTX-M-15	aadA2^;aph3-Ia.v1^;strA.v1^	-	-	qnrS1	Mrx;mphA	-	-	sul1;sul2	tet(A).v2	-	dfrA12	-	-	SHV-11^	35Q	-	-	-	KL127	unknown (KL127)	?5	Typeable	100.00%	-	OL13	O13	?7+!	Typeable
102014	2021-06-14	Kenya	Wound	ST1213	no	no	SAMN54588081	-	0	-	0	-	0	-	0	-	0	-	-	-	CTX-M-15	-	-	-	qnrS1	-	-	-	-	-	-	dfrA14.v2*	-	-	SHV-1^	-	-	-	-	KL103	unknown (KL103)	-	Typeable	98.91%	-	O1/O2v1	O1ab	-	Typeable
102016	2021-06-15	Kenya	Wound	ST1180-1LV	no	no	SAMN54588082	-	0	-	0	-	0	-	0	-	0	-	-	-	CTX-M-15	aac(3)-IIa.v1^;aac(6')-Ib-cr.v2;strA.v1^;strB.v1	-	-	qnrB1.v2^	-	-	-	sul2	tet(A).v1	-	dfrA14.v2*	OXA-1;TEM-1D.v1^	-	SHV-36^	35Q	-	-	-	KL140	unknown (KL140)	-	Typeable	99.82%	-	O3b	O3b	-	Typeable
102024	2021-09-21	Kenya	Wound	ST218	yes	yes	SAMN54588083	ybt 10; ICEKp4 (truncated)	89-2LV	-	0	iuc 1	78	iro 1	1-1LV	rmp 1; KpVP-1 (truncated)	126-1LV	rmpA2_2*-47%	peg-344	-	CTX-M-15	aac(3)-IId^;aac(6')-Ib-cr.v2^;aadA2^;aph3-Ia.v1;rmtB;strA.v1^;strB.v1	-	-	-	-	catII.2*	arr-3	sul2*	tet(A).v1;tet(G).v1	-	dfrA12	TEM-1D.v1^	-	SHV-1^	-	-	-	-	KL57	K57	-	Typeable	99.52%	-	O1/O2v2	O2afg	-	Typeable
102031	2021-11-02	Kenya	Wound	ST17	no	no	SAMN54588084	-	0	-	0	-	0	-	0	-	0	-	-	-	CTX-M-15	aac(6')-Ib-cr.v2;aadA16*;strA.v1*;strB.v1*	-	-	-	-	catII.2*	arr-3	sul1;sul2	-	-	dfrA27	TEM-1D.v1^	-	SHV-11^	35Q	-	-	-	KL23	K23	-	Typeable	99.92%	-	O1/O2v2	O1ab	-	Typeable
102034	2021-11-22	Kenya	Urine	ST1307	no	no	SAMN54588085	-	0	-	0	-	0	-	0	-	0	-	-	-	CTX-M-15	aadA2^;aph3-Ia.v1^;strA.v1^	-	-	qnrS1	Mrx;mphA	floR.v1	-	sul1;sul2	tet(A).v1?	-	dfrA12	-	-	SHV-11^	35Q	-	-	-	KL127	unknown (KL127)	?5	Typeable	100.00%	-	OL13	O13	?7+!	Typeable
102044	2021-11-08	Kenya	Wound	ST469	no	no	SAMN54588086	-	0	-	0	-	0	-	0	-	0	-	-	-	CTX-M-15	aadA2^;aph3-Ia.v1^;strA.v1*;strB.v1*	-	-	qnrS1	Mrx;mphA	catII.2*	-	sul1;sul2	tet(A).v1	-	dfrA12	-	-	SHV-11^	35Q	-	-	-	KL139	unknown (KL139)	?4	Typeable	99.52%	-	O3b	O3b	?5	Typeable
102046	2021-06-02	Kenya	Wound	ST39	no	no	SAMN54588087	ybt 16; ICEKp12	287	-	0	-	0	-	0	-	0	-	-	-	CTX-M-15	aac(3)-IIa.v1;aph3-Ia.v1^	-	-	-	-	catA1^	-	sul1	tet(A).v1	-	dfrA7	TEM-1D.v1^	-	SHV-11^	35Q	-	-	-	KL149	unknown (KL149)	-	Typeable	99.32%	-	O1/O2v2	O1ab	-	Typeable
102048	2021-07-07	Kenya	Wound	ST39	no	no	SAMN54588088	ybt 14; ICEKp5	595-1LV	-	0	-	0	-	0	-	0	-	-	-	CTX-M-15	aac(3)-IIa.v1^;aac(6')-Ib-cr.v2;strA.v1^;strB.v1	-	-	qnrB1.v2^	-	-	-	sul2	tet(A).v1	-	dfrA14.v2*	OXA-1;TEM-1D.v1^	-	SHV-1^	-	-	-	-	KL23	K23	-	Typeable	99.94%	-	O1/O2v2	O1ab	-	Typeable
102060	2021-11-23	Kenya	Wound	ST39	no	no	SAMN54588089	ybt 14; ICEKp5	595-1LV	-	0	-	0	-	0	-	0	-	-	-	CTX-M-15	aac(3)-IIa.v1^;aac(6')-Ib-cr.v2;strA.v1^;strB.v1	-	-	qnrB1.v2^	-	-	-	sul2	-	-	dfrA14.v2*	OXA-1;TEM-1D.v1^	-	SHV-1^	-	-	-	-	KL23	K23	-	Typeable	99.94%	-	O1/O2v2	O1ab	-	Typeable
366562	2015-07-12	Kenya	Urine	ST147	no	no	SAMN54588151	ybt 10; ICEKp4	384	-	0	-	0	-	0	-	0	-	-	OXA-181	CTX-M-15	aac(6')-Ib;rmtF;strB.v1	-	-	-	mphA	-	arr-2	sul2	-	-	dfrA14.v2*	TEM-1D.v1^	-	SHV-11^	35Q	OmpK35-76%;OmpK36TD	MgrB-89%	GyrA-83I;GyrA-87G;ParC-80I	KL64	K64	-	Typeable	100.00%	-	O1/O2v1	O2a	-	Typeable
366571	2015-05-11	Kenya	Respiratory	ST147	no	no	SAMN54588152	ybt 10; ICEKp4	384	-	0	-	0	-	0	-	0	-	-	OXA-181	CTX-M-15	aac(6')-Ib;rmtF;strB.v1	-	-	-	mphA	-	arr-2	sul2	-	-	dfrA14.v2*	TEM-1D.v1^	-	SHV-11^	35Q	OmpK35-76%;OmpK36TD	-	GyrA-83I;ParC-80I	KL64	K64	-	Typeable	100.00%	-	O1/O2v1	O2a	-	Typeable
366580	2015-05-10	Kenya	Blood	ST147	no	no	SAMN54588153	ybt 10; ICEKp4	384	-	0	-	0	-	0	-	0	-	-	OXA-181	CTX-M-15	aac(6')-Ib;rmtF;strB.v1	-	-	-	mphA	-	arr-2	sul2	-	-	dfrA14.v2*	TEM-1D.v1^	-	SHV-11^	35Q	OmpK35-76%;OmpK36TD	-	GyrA-83I;ParC-80I	KL64	K64	-	Typeable	100.00%	-	O1/O2v1	O2a	-	Typeable
366599	2015-05-13	Kenya	Blood	ST147	no	no	SAMN54588154	ybt 10; ICEKp4	384	-	0	-	0	-	0	-	0	-	-	OXA-181	CTX-M-15	aac(6')-Ib;rmtF;strA.v1;strB.v1	-	-	-	mphA	-	arr-2	sul2	-	-	dfrA14.v2*	TEM-1D.v1^	-	SHV-11^	35Q	OmpK35-76%;OmpK36TD	-	GyrA-83I;ParC-80I	KL64	K64	-	Typeable	100.00%	-	O1/O2v1	O2a	-	Typeable
366605	2015-05-16	Kenya	Blood	ST147	no	no	SAMN54588155	ybt 10; ICEKp4	384	-	0	-	0	-	0	-	0	-	-	OXA-181	CTX-M-15	aac(6')-Ib;rmtF;strB.v1	-	-	-	mphA	-	arr-2	sul2	-	-	dfrA14.v2*	TEM-1D.v1^	-	SHV-11^	35Q	OmpK35-76%;OmpK36TD	-	GyrA-83I;ParC-80I	KL64	K64	-	Typeable	100.00%	-	O1/O2v1	O2a	-	Typeable
366614	2015-06-19	Kenya	Respiratory	ST147	no	no	SAMN54588156	ybt 10; ICEKp4	384	-	0	-	0	-	0	-	0	-	-	OXA-181	CTX-M-15	aac(6')-Ib;rmtF;strB.v1	-	-	-	mphA	-	arr-2	sul2	-	-	dfrA14.v2*	TEM-1D.v1^	-	SHV-11^	35Q	OmpK35-76%;OmpK36TD	-	GyrA-83I;ParC-80I	KL64	K64	-	Typeable	100.00%	-	O1/O2v1	O2a	-	Typeable
366623	2015-07-25	Kenya	Urine	ST147	no	no	SAMN54588157	ybt 10; ICEKp4	384	-	0	-	0	-	0	-	0	-	-	OXA-181	CTX-M-15	aac(6')-Ib;rmtF	-	-	qnrB1.v2^	Mrx;mphA	-	arr-2	-	-	-	dfrA14.v2*	-	-	SHV-11^	35Q	OmpK35-76%;OmpK36TD	-	GyrA-83I;ParC-80I	KL64	K64	-	Typeable	100.00%	-	O1/O2v1	O2a	-	Typeable
366632	2015-07-29	Kenya	Urine	ST37	no	no	SAMN54588158	-	0	-	0	-	0	-	0	-	0	-	-	-	CTX-M-15	aac(3)-IId^;aac(6')-Ib-cr.v2^;aadA2^;rmtB;strA.v1^;strB.v1*	-	-	qnrB4	-	-	arr-3	sul2*	tet(A).v1;tet(G).v1	-	dfrA12	DHA-1;TEM-1D.v1^	-	SHV-11^	35Q	-	-	-	KL136	unknown (KL136)	-	Typeable	99.90%	-	O1/O2v2	O1ab	-	Typeable
366641	2015-07-29	Kenya	Wound	ST3430	no	no	SAMN54588159	-	0	-	0	-	0	-	0	-	0	-	-	-	CTX-M-15	aac(3)-IIa.v1^;aac(6')-Ib-cr.v2;aadA5;aph3-Ia.v1^;strA.v1^;strB.v1	-	-	qnrS1	Mrx;mphA	catII.2*	-	sul1;sul2	tet(A).v1	-	dfrA17	OXA-1;TEM-1D.v1^	-	SHV-77^	35Q	-	-	-	KL52	K52	-	Typeable	99.94%	-	OL13	O13	!	Typeable
366863	2015-11-16	Kenya	Perianal swab	ST35	no	no	SAMN54588160	ybt 9; ICEKp3 (truncated)	183-1LV	-	0	-	0	-	0	-	0	-	-	-	CTX-M-15	aac(3)-IId^;aadA2^;aph3-Ia.v1;rmtB;strA.v1^;strB.v1	-	-	-	-	catII.2*	-	sul2?	tet(A).v1;tet(D);tet(G).v1	-	dfrA12;dfrA5	TEM-1D.v1^	-	SHV-33	-	-	-	-	KL16	K16	-	Typeable	99.71%	-	O1/O2v1	O1ab	-	Typeable
366997	2015-11-16	Kenya	Urine	ST48	no	no	SAMN54588161	ybt 14; ICEKp12	586-1LV	-	0	-	0	-	0	-	0	-	-	-	CTX-M-15	aac(3)-IIa.v1^;aac(6')-Ib-cr.v2;aadA2^	-	-	-	Mrx;mphA	catA1^	-	sul1	tet(A).v1	-	dfrA12	OXA-1;TEM-1D.v1^	-	SHV-1^	-	OmpK36-44%	-	GyrA-83Y	KL62	K62	?2!	Typeable	99.82%	-	O1/O2v1	O1ab	-	Typeable
367905	2015-11-16	Kenya	Urine	ST70	no	no	SAMN54588162	ybt 8; ICEKp9	195	-	0	-	0	-	0	-	0	-	-	-	CTX-M-15	aac(3)-IIa.v1^;aac(6')-Ib-cr.v2;strA.v1^;strB.v1	-	-	qnrB1.v2^	-	-	-	sul2	tet(A).v1	-	dfrA14.v2*	OXA-1;TEM-1D.v1^	-	SHV-32	156D	-	-	-	KL136	unknown (KL136)	-	Typeable	99.88%	-	O1/O2v2	O1ab	-	Typeable
367914	2015-11-16	Kenya	Wound	ST15	no	no	SAMN54588163	ybt 10; ICEKp4	162	-	0	-	0	-	0	-	0	-	-	-	CTX-M-15	aac(3)-IIa.v1^;aac(6')-Ib-cr.v2;aadA^;strA.v1^;strB.v1	-	-	-	Mrx;mphA	catA1*;catII.2*	-	sul1^;sul2	tet(A).v1	-	dfrA15.v2	OXA-1;TEM-1D.v1^	-	SHV-28^	-	OmpK36-0%	-	GyrA-83F;GyrA-87A;ParC-80I	KL24	K24	-	Typeable	100.00%	-	O1/O2v1	O1ab	-	Typeable
367923	2012-03-04	Kenya	Surveillance	ST392	no	no	SAMN54588164	-	0	-	0	-	0	-	0	-	0	-	-	NDM-1	CTX-M-15	aac(6')-Ib-cr.v2;armA;strA.v1^;strB.v1	-	-	qnrB1.v2^	mphE.v2;msrE	-	-	sul1;sul2	tet(A).v1	-	dfrA14.v2*	OXA-1;TEM-1D.v1^	-	SHV-11^	35Q	-	-	GyrA-83I;ParC-80I	KL27	K27	-	Typeable	99.78%	-	O4	O4	-	Typeable
367932	2015-11-16	Kenya	Human	ST11	no	no	SAMN54588165	-	0	-	0	-	0	-	0	-	0	-	-	-	-	aac(6')-Ib-cr.v2^;aph3-Ia.v1^	-	-	qnrB4	Mrx;mphA	catA1^;catB3.v2	arr-3	sul1	-	-	dfrA12	DHA-1;OXA-1	-	SHV-11	35Q	OmpK36-75%	-	GyrA-83I;ParC-80I	KL105	unknown (KL105)	-	Typeable	100.00%	-	O1/O2v2	O2afg	?2!	Typeable
367941	2015-11-16	Kenya	Human	ST11	no	no	SAMN54588166	-	0	-	0	-	0	-	0	-	0	-	-	-	-	aac(6')-Ib-cr.v2^;aph3-Ia.v1^	-	-	qnrB4	Mrx;mphA	catA1^;catB3.v2	arr-3	sul1	-	-	dfrA12	DHA-1;OXA-1	-	SHV-11	35Q	OmpK36-75%	-	GyrA-83I;ParC-80I	KL105	unknown (KL105)	-	Typeable	100.00%	-	O1/O2v2	O2afg	?2!	Typeable
367950	2013-03-14	Kenya	Human	ST11	no	no	SAMN54588167	ybt 15; ICEKp11	230-2LV	-	0	-	0	-	0	-	0	-	-	NDM-1	CTX-M-15	aac(6')-Ib'.v1;aac(6')-Ib-cr.v2;strA.v1^;strB.v1	-	-	QnrB76^	Mrx;mphA	catII.2*	-	sul2	tet(A).v1	-	dfrA14.v2*	OXA-1	-	SHV-11	35Q	-	-	GyrA-83F;GyrA-87A;ParC-80I	KL24	K24	?2!	Typeable	99.98%	-	O1/O2v1	O2a	-	Typeable
367969	2013-08-06	Kenya	Human	ST11	no	no	SAMN54588168	ybt 15; ICEKp11	230-1LV	-	0	-	0	-	0	-	0	-	-	NDM-1	CTX-M-15	aac(6')-Ib'.v1;aac(6')-Ib-cr.v2;strA.v1^;strB.v1	-	-	QnrB76^	Mrx;mphA	catII.2*	-	sul2	tet(A).v1	-	dfrA14.v2*	OXA-1	-	SHV-11	35Q	-	-	GyrA-83F;GyrA-87A;ParC-80I	KL24	K24	?2!	Typeable	99.96%	-	O1/O2v1	O2a	-	Typeable
367978	2015-11-16	Kenya	Urine	ST147	no	no	SAMN54588169	ybt 14; ICEKp5	354-2LV	-	0	-	0	-	0	-	0	-	-	NDM-1	CTX-M-15	aac(6')-Ib;aac(6')-Ib-cr.v2;rmtF	-	-	qnrB1.v1	ereA2*	cmlA5	arr-2	sul1*	-	-	-	OXA-1	-	SHV-11^	35Q	-	-	GyrA-83Y;GyrA-87A;ParC-80I	KL10	K10	?3	Typeable	98.99%	-	O3/O3a	O3/O3a	?4	Typeable
367987	2015-11-16	Kenya	Human	ST11	no	no	SAMN54588170	ybt 9; ICEKp3	183	-	0	-	0	-	0	-	0	-	-	-	-	aac(6')-Ib?;rmtF	-	-	-	-	-	arr-2	-	-	-	-	-	-	SHV-11	35Q	-	-	GyrA-83I;ParC-80I	KL15	K15	-	Typeable	99.92%	-	O4	O4	-	Typeable
367996	2014-02-20	Kenya	Unknown	ST147	no	no	SAMN54588171	ybt 10; ICEKp4	384	-	0	-	0	-	0	-	0	-	-	OXA-181	CTX-M-15	aac(6')-Ib;rmtF	-	-	qnrB1.v2^	Mrx;mphA	-	arr-2	-	-	-	dfrA14.v2*	-	-	SHV-11^	35Q	OmpK35-76%;OmpK36TD	-	GyrA-83I;ParC-80I	KL64	K64	-	Typeable	100.00%	-	O1/O2v1	O2a	?2	Typeable
368001	2015-11-16	Kenya	Unknown	ST14	no	no	SAMN54588172	-	0	-	0	-	0	-	0	-	0	-	-	NDM-1	CTX-M-15	aac(6')-Ib-cr.v2;aadA2^;aph(3')-VI;armA;sat-2	-	-	qnrB1.v2^	mphE.v2^;msrE	catA1^	-	sul1	-	-	dfrA1.v1;dfrA12	OXA-1	-	SHV-28^	-	OmpK36GD	-	GyrA-83Y;GyrA-87G;ParC-80I	KL2	K2	?2	Typeable	99.78%	-	O1/O2v1	O1ab	?2	Typeable
368010	2015-11-16	Kenya	Portovac fluid	ST16	no	no	SAMN54588173	-	0	-	0	-	0	-	0	-	0	-	-	NDM-5	CTX-M-15	aac(6')-Ib-cr.v2;aadA2^	-	-	-	Mrx;ermB.v1*;mphA*	-	-	sul1	-	-	dfrA12	OXA-1;TEM-1D.v1^	-	SHV-1	-	OmpK35-3%	-	GyrA-83F;GyrA-87N;ParC-84K	KL51	K51	-	Typeable	100.00%	-	O3b	O3b	-	Typeable
368029	2014-06-11	Kenya	Blood	ST147	no	no	SAMN54588174	-	0	-	0	-	0	-	0	-	0	-	-	NDM-1	CTX-M-15;SHV-12	aac(3)-IIa.v1^;aac(6')-Ib-cr.v2;strA.v1^;strB.v1	-	-	qnrB1.v2^	-	-	-	sul2	tet(A).v1	-	dfrA14.v2*	OXA-1;TEM-1D.v1^	-	-	238S;240K;35Q	-	-	GyrA-83Y;GyrA-87A;ParC-80I	KL10	K10	?3	Typeable	99.01%	-	O3/O3a	O3/O3a	?4	Typeable
368038	2014-06-11	Kenya	Blood	ST147	no	no	SAMN54588175	-	0	-	0	-	0	-	0	-	0	-	-	NDM-1	CTX-M-15;SHV-12	aac(3)-IIa.v1^;aac(6')-Ib-cr.v2;strA.v1^;strB.v1	-	-	qnrB1.v2^	-	-	-	sul2	tet(A).v1	-	dfrA14.v2*	OXA-1;TEM-1D.v1^	-	-	238S;240K;35Q	-	-	GyrA-83Y;GyrA-87A;ParC-80I	KL10	K10	?3	Typeable	99.03%	-	O3/O3a	O3/O3a	?4	Typeable
368047	2015-11-16	Kenya	Blood	ST147	no	no	SAMN54588176	-	0	-	0	-	0	-	0	-	0	-	-	NDM-1	CTX-M-15;SHV-12	aac(3)-IIa.v1^;aac(6')-Ib-cr.v2;strA.v1^;strB.v1	-	-	qnrB1.v2^	-	-	-	sul2	tet(A).v1	-	dfrA14.v2*	OXA-1;TEM-1D.v1^	-	-	-	-	-	GyrA-83Y;GyrA-87A;ParC-80I	KL10	K10	?3	Typeable	98.91%	-	O3/O3a	O3/O3a	?4	Typeable
368056	2014-07-01	Kenya	Respiratory	ST147	no	no	SAMN54588177	ybt 10; ICEKp4	384	-	0	-	0	-	0	-	0	-	-	OXA-181	CTX-M-15	aac(6')-Ib;rmtF	-	-	qnrB1.v2^	Mrx;mphA	-	arr-2	-	-	-	dfrA14.v2*	-	-	SHV-11^	35Q	OmpK35-76%;OmpK36TD	-	GyrA-83I;ParC-80I	KL64	K64	-	Typeable	100.00%	-	O1/O2v1	O2a	-	Typeable
368065	2014-07-03	Kenya	Respiratory	ST147	no	no	SAMN54588178	ybt 10; ICEKp4	384	-	0	-	0	-	0	-	0	-	-	OXA-181	CTX-M-15	aac(6')-Ib;rmtF	-	-	qnrB1.v2^	Mrx;mphA	-	arr-2	-	-	-	dfrA14.v2*	-	-	SHV-11^	35Q	OmpK35-76%;OmpK36TD	-	GyrA-83I;ParC-80I	KL64	K64	-	Typeable	100.00%	-	O1/O2v1	O2a	-	Typeable
368074	2014-08-02	Kenya	Respiratory	ST147	no	no	SAMN54588179	-	0	-	0	-	0	-	0	-	0	-	-	NDM-1	CTX-M-15;SHV-12	aac(3)-IIa.v1^;aac(6')-Ib-cr.v2;strA.v1^;strB.v1	-	-	qnrB1.v2^	-	-	-	sul2	tet(A).v1	-	dfrA14.v2*	OXA-1;TEM-1D.v1^	-	-	238S;240K;35Q	-	-	GyrA-83Y;GyrA-87A;ParC-80I	KL10	K10	?3	Typeable	98.99%	-	O3/O3a	O3/O3a	?4	Typeable
368083	2014-08-02	Kenya	Blood	ST147	no	no	SAMN54588180	-	0	-	0	-	0	-	0	-	0	-	-	NDM-1	CTX-M-15;SHV-12	aac(3)-IIa.v1^;aac(6')-Ib-cr.v2;strA.v1^;strB.v1	-	-	qnrB1.v2^	-	-	-	sul2	tet(A).v1	-	dfrA14.v2*	OXA-1;TEM-1D.v1^	-	SHV-11^	238S;240K;35Q;35Q	-	-	GyrA-83Y;GyrA-87A;ParC-80I	KL10	K10	?3	Typeable	98.99%	-	O3/O3a	O3/O3a	?4	Typeable
368092	2014-08-06	Kenya	Blood	ST147	no	no	SAMN54588181	-	0	-	0	-	0	-	0	-	0	-	-	NDM-1	CTX-M-15;SHV-12	aac(3)-IIa.v1^;aac(6')-Ib-cr.v2;strA.v1^;strB.v1	-	-	qnrB1.v2^	-	-	-	sul2	tet(A).v1	-	dfrA14.v2*	OXA-1;TEM-1D.v1^	-	-	238S;240K;35Q	-	-	GyrA-83Y;GyrA-87A;ParC-80I	KL10	K10	?3	Typeable	98.99%	-	O3/O3a	O3/O3a	?4	Typeable
368108	2014-10-11	Kenya	Peritoneal fluid	ST147	no	no	SAMN54588182	-	0	-	0	-	0	-	0	-	0	-	-	NDM-1	CTX-M-15;SHV-12	aac(3)-IIa.v1^;aac(6')-Ib-cr.v2;strA.v1^;strB.v1	-	-	qnrB1.v2^	-	-	-	sul2	tet(A).v1	-	dfrA14.v2*	OXA-1;TEM-1D.v1^	-	-	-	-	-	GyrA-83Y;GyrA-87A;ParC-80I	KL10	K10	?3	Typeable	99.01%	-	O3/O3a	O3/O3a	?4	Typeable
368117	2015-11-16	Kenya	Blood	ST147	no	no	SAMN54588183	-	0	-	0	-	0	-	0	-	0	-	-	NDM-1	CTX-M-15;SHV-12	aac(3)-IIa.v1^;aac(6')-Ib-cr.v2;strA.v1^;strB.v1	-	-	qnrB1.v2^	-	-	-	sul2	tet(A).v1	-	dfrA14.v2*	OXA-1;TEM-1D.v1^	-	-	-	-	-	GyrA-83Y;GyrA-87A;ParC-80I	KL10	K10	?3	Typeable	98.99%	-	O3/O3a	O3/O3a	?4	Typeable
368126	2015-01-12	Kenya	Respiratory	ST14	no	no	SAMN54588184	ybt 14; ICEKp5	140	-	0	-	0	-	0	-	0	-	-	OXA-181	CTX-M-15	aac(3)-IIa.v1^;aac(6')-Ib-cr.v2;sat-2	-	-	-	Mrx;ereA2*;mphA	cmlA5	arr-2	sul1*	-	-	dfrA1.v1	OXA-1;OXA-9.v1	-	SHV-28^	-	OmpK35-66%;OmpK36GD	-	GyrA-83Y;GyrA-87G;ParC-80I	KL2	K2	-	Typeable	99.81%	-	O1/O2v1	O1ab	?2	Typeable
368135	2015-11-16	Kenya	Unknown	ST147	no	no	SAMN54588185	ybt 10; ICEKp4	384	-	0	-	0	-	0	-	0	-	-	OXA-181	CTX-M-15	aac(6')-Ib;rmtF;strB.v1	-	-	-	mphA	-	arr-2	sul2	-	-	dfrA14.v2*	TEM-1D.v1^	-	SHV-11^	35Q	OmpK35-76%;OmpK36TD	-	GyrA-83I;ParC-80I	KL64	K64	-	Typeable	100.00%	-	O1/O2v1	O2a	-	Typeable
368144	2015-03-04	Kenya	Wound	ST15	no	no	SAMN54588186	-	0	-	0	-	0	-	0	-	0	-	-	-	CTX-M-15	aac(3)-IIa.v1^;aac(6')-Ib-cr.v2;strA.v1^;strB.v1	-	-	qnrB1.v2^	-	-	-	sul2	-	-	dfrA14.v2*	OXA-1;TEM-1D.v1^	-	SHV-28^	-	-	-	GyrA-83F;GyrA-87A;ParC-80I	KL112	unknown (KL112)	-	Typeable	99.53%	-	O1/O2v1	O1ab	-	Typeable
368153	2015-11-16	Kenya	Urine	ST147	no	no	SAMN54588187	ybt 10; ICEKp4	384	-	0	-	0	-	0	-	0	-	-	OXA-181	CTX-M-15	aac(6')-Ib;rmtF	-	-	-	Mrx;mphA	-	arr-2	-	-	-	dfrA14.v2*	-	-	SHV-11^	35Q	OmpK35-76%;OmpK36TD	-	GyrA-83I;ParC-80I	KL64	K64	-	Typeable	100.00%	-	O1/O2v1	O2a	-	Typeable
368287	2015-08-12	Kenya	Wound	ST147	no	no	SAMN54588188	ybt 10; ICEKp4	384	-	0	-	0	-	0	-	0	-	-	OXA-181	CTX-M-15	aac(6')-Ib;rmtF	-	-	-	mphA	-	arr-2	-	-	-	dfrA14.v2*	-	-	SHV-11^	35Q	OmpK35-76%;OmpK36TD	-	GyrA-83I;ParC-80I	KL64	K64	-	Typeable	100.00%	-	O1/O2v1	O2a	-	Typeable
368311	2015-11-16	Kenya	Urine	ST231	yes	yes	SAMN54588189	ybt 14; ICEKp5	376	-	0	iuc 5	61-3LV	-	0	-	0	-	-	OXA-232	CTX-M-15	aac(6')-Ib?;aadA2^; rmtF (plasmid)	-	-	qnrS1	Mrx;ermB.v1*;mphA	catA1^	arr-2	sul1	-	-	dfrA12	-	-	SHV-1^	-	OmpK35-30%;OmpK36TD	-	GyrA-83I;ParC-80I	KL51	K51	!	Typeable	99.67%	-	O1/O2v2	O1ab	?2	Typeable
368320	2015-09-29	Kenya	Blood	ST38	no	no	SAMN54588190	ybt 14; ICEKp5	354-3LV	-	0	-	0	-	0	-	0	-	-	OXA-232?	CTX-M-15	aac(3)-IIa.v1^;aac(6')-Ib-cr.v2;strA.v1^;strB.v1	-	-	qnrB1.v2^	-	-	-	sul2	tet(A).v1	-	dfrA14.v2*	OXA-1;TEM-1D.v1^	-	SHV-11^	35Q	OmpK35-21%;OmpK36GD	-	GyrA-83F;GyrA-87A;ParC-80I	KL52	K52	?3	Typeable	99.94%	-	OL13	O13	?3!	Typeable
387291	2015-11-15	Kenya	Wound	ST20	no	no	SAMN54588195	ybt 14; ICEKp5	135-1LV	-	0	-	0	-	0	-	0	-	-	-	CTX-M-15	-	-	-	-	-	-	-	-	-	-	-	-	-	SHV-187	-	-	-	-	KL28	K28	-	Typeable	99.80%	-	O1/O2v2	O1ab	-	Typeable
488606	2017-04-12	Kenya	Wound	ST15	no	no	SAMN54588258	-	0	-	0	-	0	-	0	-	0	-	-	-	-	aac(3)-IV;aac(6')-Ib-cr.v2;aadA16*;aadA2;aadA^;aph(3')-Ia;aph(4)-Ia;armA;strA.v1*;strB.v1	mcr-8.1	-	qnrB4	mphE.v2;msrE	cmlA1*;floR.v1*	arr-3	sul1;sul3	-	tmexC1^;tmexD1;toprJ1	dfrA27	DHA-1	-	SHV-28^	-	OmpK35-21%	-	GyrA-83F;GyrA-87A;ParC-80I	KL166	unknown (KL166)	-	Typeable	99.49%	-	O1/O2v2	O1ab	-	Typeable
488679	2017-02-14	Kenya	Urine	ST15	no	no	SAMN54588259	ybt 9; ICEKp3	183-2LV	-	0	-	0	-	0	-	0	-	-	-	-	aadA*	-	-	-	ereA2*	cmlA5	arr-2	sul1*	-	-	dfrA14.v2*	-	-	SHV-28^	-	OmpK35-87%	-	GyrA-83F;GyrA-87A;ParC-80I	KL112	unknown (KL112)	-	Typeable	99.53%	-	O1/O2v1	O1ab	?2	Typeable
488703	2017-06-28	Kenya	Wound	ST551	no	no	SAMN54588260	-	0	-	0	-	0	-	0	-	0	-	-	-	-	aph3-Ia.v1^;strA.v1^;strB.v1	-	-	-	-	-	-	sul1;sul2*	tet(D)	-	dfrA7	-	-	SHV-1^	-	-	-	-	KL10	K10	-	Typeable	98.63%	-	O1/O2v1	O1ab	-	Typeable
488855	2016-06-15	Kenya	Wound	ST39	no	no	SAMN54588261	ybt 14; ICEKp5	135-1LV	-	0	-	0	-	0	-	0	-	-	-	-	strA.v1^;strB.v1	-	-	-	-	-	-	sul2*	-	-	-	-	-	SHV-1^	-	-	-	-	KL62	K62	!	Typeable	99.82%	-	O1/O2v1	O1ab	-	Typeable
488952	2015-09-07	Kenya	Wound	ST15	no	no	SAMN54588262	ybt 9; ICEKp3	183-2LV	-	0	-	0	-	0	-	0	-	-	-	CTX-M-15	aac(3)-IIa.v1^;aac(6')-Ib-cr.v2;aadA*;aadA2^;aph(3')-Ia*;strA.v1*;strB.v1*	-	-	-	Mrx;mphA	floR.v2*	arr-2	sul1;sul2	tet(D)	-	dfrA12;dfrA14.v2*	OXA-1;OXA-10	-	SHV-28^	-	OmpK35-64%	-	GyrA-83F;GyrA-87A;ParC-80I	KL24	Capsule null	!	Typeable	99.98%	-	O1/O2v1	O1ab	-	Typeable
489021	2017-04-24	Kenya	Wound	ST37	no	no	SAMN54588263	-	0	-	0	-	0	-	0	-	0	-	-	-	-	-	-	-	-	-	-	-	-	-	-	-	-	-	SHV-11^	35Q	-	-	-	KL145	unknown (KL145)	?3-+!	Untypeable	97.75%	KL145_01_galF;KL145_22_rmlC;KL145_02_cpsACP	OL103	unknown (OL103)	?2	Typeable
489100	2016-04-06	Kenya	Wound	ST364	no	no	SAMN54588264	-	0	-	0	-	0	-	0	-	0	-	-	-	CTX-M-15	aac(3)-IIa.v1^;aac(6')-Ib-cr.v2;aadA5;aph3-Ia.v1^;strA.v1^;strB.v1	-	-	qnrB1.v2^	Mrx;mphA	-	-	sul1;sul2	tet(A).v1;tet(D)	-	dfrA14.v2*;dfrA17	OXA-1;TEM-1D.v1^	-	-	-	-	-	-	KL166	unknown (KL166)	-	Typeable	99.90%	-	O1/O2v2	O1ab	-	Typeable
537203	2017-07-10	Kenya	Wound	ST966	no	no	SAMN54588489	-	0	-	0	-	0	-	0	-	0	-	-	-	-	aph3-Ia.v1^	-	-	-	-	-	-	-	-	-	-	-	-	SHV-41	-	-	-	-	KL102	unknown (KL102)	-	Typeable	99.67%	-	O1/O2v1	O2a	-	Typeable
537230	2017-04-12	Kenya	Wound	ST15	no	no	SAMN54588490	-	0	-	0	-	0	-	0	-	0	-	-	-	-	aac(3)-IV;aac(6')-Ib-cr.v2;aadA16*;aadA2;aadA^;aph(3')-Ia;aph(4)-Ia;armA;strA.v1*;strB.v1	mcr-8.1	-	qnrB4	mphE.v2;msrE	cmlA1*;floR.v1*	arr-3	sul1;sul3	-	tmexC1^;tmexD1;toprJ1	dfrA27	DHA-1	-	SHV-28^	-	OmpK35-21%	-	GyrA-83F;GyrA-87A;ParC-80I	KL166	unknown (KL166)	-	Typeable	99.49%	-	O1/O2v2	O1ab	-	Typeable
537276	2017-06-14	Kenya	Urine	ST15	no	no	SAMN54588491	ybt 9; ICEKp3	183-2LV	-	0	-	0	-	0	-	0	-	-	-	-	aadA*	-	-	-	ereA2*	cmlA5	arr-2	sul1*	-	-	dfrA14.v2*	-	-	SHV-28^	-	OmpK35-87%	-	GyrA-83F;GyrA-87A;ParC-80I	KL112	unknown (KL112)	-	Typeable	99.53%	-	O1/O2v1	O1ab	?2	Typeable
537601	2017-11-29	Kenya	Urine	ST15	no	no	SAMN54588492	ybt 9; ICEKp3 (truncated)	174-1LV	-	0	-	0	-	0	-	0	-	-	-	CTX-M-15	aac(3)-IIa.v1^;aac(6')-Ib-cr.v2;strA.v1^;strB.v1	-	-	qnrB1.v2^	-	-	-	sul2	tet(A).v1	-	dfrA14.v2*	OXA-1;TEM-1D.v1^	-	SHV-28^	-	-	-	GyrA-83F;GyrA-87A;ParC-80I	KL112	unknown (KL112)	-	Typeable	99.53%	-	O1/O2v1	O1ab	-	Typeable
537674	2017-04-10	Kenya	Wound	ST37	no	no	SAMN54588493	-	0	-	0	-	0	-	0	-	0	-	-	-	-	-	-	-	-	-	-	-	-	-	-	-	-	-	SHV-11^	35Q	-	-	-	KL145	unknown (KL145)	-+!	Typeable	97.63%	KL145_01_galF;KL145_22_rmlC;KL145_02_cpsACP	OL103	unknown (OL103)	-	Typeable
537762	2017-11-07	Kenya	Urine	ST307	no	no	SAMN54588494	-	0	-	0	-	0	-	0	-	0	-	-	-	CTX-M-15	aac(3)-IIa.v1^;aac(6')-Ib-cr.v2;strB.v1	-	-	qnrB1.v2^	-	CatB4.v1	-	sul2	tet(A).v1	-	dfrA14.v2*	OXA-1;TEM-1D.v1^	-	SHV-28^	-	-	-	GyrA-83I;ParC-80I	KL102	unknown (KL102)	-	Typeable	99.66%	-	O1/O2v2	O2afg	-	Typeable
569929	2017-07-10	Kenya	Swab	ST966	no	no	SAMN54588520	-	0	-	0	-	0	-	0	-	0	-	-	-	-	aadA2^;aph3-Ia.v1^	-	-	qnrB4	Mrx;mphA	-	-	sul1	-	-	dfrA12	DHA-1	-	SHV-41	-	-	-	-	KL102	unknown (KL102)	-	Typeable	99.67%	-	O1/O2v1	O2a	-	Typeable
570101	2018-01-17	Kenya	Wound	ST607	no	no	SAMN54588521	ybt 14; ICEKp12	586	-	0	-	0	-	0	-	0	-	-	-	CTX-M-15	aac(3)-IIa.v1;aac(6')-Ib-cr.v2;aadA16*;strA.v1;strB.v1*	-	-	-	-	-	arr-3	sul1;sul2	tet(D)	-	dfrA27	SCO-1;TEM-103*	-	SHV-1^	-	-	-	-	KL25	K25	!	Typeable	99.69%	-	O1/O2v1	O1ab	?2	Typeable
570165	2017-12-11	Kenya	Wound	ST607	no	no	SAMN54588522	ybt 14; ICEKp12	586	-	0	-	0	-	0	-	0	-	-	-	CTX-M-15	aac(3)-IIa.v1;strB.v1*	-	-	qnrB6^	-	catII.2*	arr-3	sul1;sul2	tet(D)	-	dfrA27	SCO-1;TEM-1D.v1^	-	SHV-1^	-	-	-	-	KL25	K25	!	Typeable	99.69%	-	O1/O2v1	O1ab	-	Typeable
570217	2018-03-12	Kenya	Urine	ST14	no	no	SAMN54588523	-	0	-	0	-	0	-	0	-	0	-	-	-	CTX-M-15	aac(6')-Ib-cr.v2;strA.v1^;strB.v1	-	-	qnrB1.v2^	-	-	-	sul2	tet(A).v1	-	dfrA14.v2*	OXA-1	-	SHV-28^	-	-	-	-	KL2	K2	-	Typeable	99.83%	-	O1/O2v1	O1ab	-	Typeable
570244	2018-04-18	Kenya	Swab	ST55	no	no	SAMN54588524	-	0	-	0	-	0	-	0	-	0	-	-	-	CTX-M-98	aac(3)-IId^;aac(6')-Ib-cr.v2;aadA16*;aph3-Ia.v1;strA.v1^;strB.v1	-	-	qnrS1	Mrx;mphA	floR.v1*	arr-3	sul1;sul2*	tet(A).v1	-	dfrA27	-	-	SHV-11^	35Q	-	-	-	KL50	Capsule null	?3!	Typeable	97.99%	-	O3b	O3b	?2	Typeable
570314	2017-11-07	Kenya	Urine	ST307	no	no	SAMN54588525	-	0	-	0	-	0	-	0	-	0	-	-	-	CTX-M-15	aac(3)-IIa.v1^;aac(6')-Ib-cr.v2;strA.v1^;strB.v1	-	-	qnrB1.v2^	-	-	-	sul2	tet(A).v1	-	dfrA14.v2*	OXA-1;TEM-1D.v1^	-	SHV-28^	-	-	-	GyrA-83I;ParC-80I	KL102	unknown (KL102)	-	Typeable	99.66%	-	O1/O2v2	O2afg	-	Typeable
570332	2017-11-29	Kenya	Swab	ST39	no	no	SAMN54588526	ybt 16; ICEKp12	294-1LV	-	0	-	0	-	0	-	0	-	-	-	CTX-M-15	aac(3)-IId^;aac(6')-Ib-cr.v2;aadA16*	-	-	-	-	-	arr-3	sul1	-	-	dfrA27	-	-	SHV-11^	35Q	-	-	-	KL2	K2	-	Typeable	99.81%	-	O1/O2v1	O1ab	-	Typeable
570493	2018-02-26	Kenya	Urine	ST751	no	no	SAMN54588527	ybt 9; ICEKp3	183	-	0	-	0	-	0	-	0	-	-	-	CTX-M-15	strA.v1^;strB.v1	-	-	qnrB6^	Mrx;mphA	catII.2*	arr-3	sul1;sul2	tet(D)	-	dfrA14.v2*;dfrA27	TEM-1D.v1^	-	SHV-11	35Q	OmpK35-70%	-	GyrA-83I;ParC-80I	KL125	unknown (KL125)	-	Typeable	93.61%	-	O3b	O3b	-	Typeable
570509	2018-02-28	Kenya	Swab	ST307	no	no	SAMN54588528	ybt 14; ICEKp12	586	-	0	-	0	-	0	-	0	-	-	-	CTX-M-15	aac(3)-IIa.v1^;aac(6')-Ib-cr.v2;strA.v1^;strB.v1	-	-	qnrB1.v2^	-	-	-	sul2	-	-	dfrA14.v2*	OXA-1;TEM-1D.v1^	-	SHV-28^	-	-	-	GyrA-83I;ParC-80I	KL102	unknown (KL102)	-	Typeable	99.66%	-	O1/O2v2	O2afg	-	Typeable
612780	2018-07-10	Kenya	Swab	ST1786	no	no	SAMN54588600	-	0	-	0	-	0	-	0	-	0	-	-	-	CTX-M-14	aac(3)-IId^;strA.v1^;strB.v1	-	-	qnrS1	-	-	-	sul1;sul2	tet(A).v1;tet(D)	-	dfrA1.v1	LAP-2	-	SHV-11^	35Q	-	-	-	KL38	K38	-	Typeable	99.91%	-	O3b	O3b	-	Typeable
612823	2018-06-05	Kenya	Swab	ST307	no	no	SAMN54588601	-	0	-	0	-	0	-	0	-	0	-	-	-	CTX-M-15	aac(3)-IIa.v1^;aac(6')-Ib-cr.v2;strA.v1^;strB.v1	-	-	-	-	-	-	sul2	-	-	dfrA14.v2*	OXA-1;TEM-1D.v1^	-	SHV-28^	-	OmpK35-0%	-	GyrA-83I;ParC-80I	KL102	unknown (KL102)	-	Typeable	99.65%	-	O1/O2v2	O2afg	-	Typeable
612920	2018-09-11	Kenya	Swab	ST48	no	no	SAMN54588602	ybt 9; ICEKp3	193	-	0	-	0	-	0	-	0	-	-	-	CTX-M-15	aac(3)-IIa.v1;aadA2^;strA.v1^;strB.v1	-	-	-	Mrx;mphA	-	-	sul1;sul2^	-	-	dfrA12	SCO-1;TEM-1D.v1^	-	SHV-11^	35Q	-	-	-	KL62	K62	?2!	Typeable	99.82%	-	O1/O2v1	O1ab	-	Typeable
612948	2015-09-17	Kenya	Urine	ST3397	no	no	SAMN54588603	-	0	-	0	-	0	-	0	-	0	-	-	-	-	strA.v1^;strB.v1	-	-	-	-	-	-	sul2*	tet(D)	-	-	-	-	SHV-33	-	-	-	-	KL8	K8	-	Typeable	99.92%	-	O1/O2v2	O1ab	-	Typeable
613017	2018-06-06	Kenya	Swab	ST188	no	no	SAMN54588604	-	0	-	0	-	0	-	0	-	0	-	-	-	CTX-M-15	aac(6')-Ib-cr.v2;aadA16*;strA.v1*;strB.v1*	-	-	qnrS1	-	-	arr-3	sul1;sul2	-	-	dfrA27	TEM-1D.v1^	-	SHV-37	35Q	-	-	-	KL116	unknown (KL116)	-	Typeable	99.91%	-	O1/O2v1	O1ab	-	Typeable
613062	2018-06-27	Kenya	Urine	ST17	no	no	SAMN54588605	ybt 16; ICEKp12	277	-	0	-	0	-	0	-	0	-	-	-	CTX-M-15	aac(3)-IIa.v1;aac(6')-Ib-cr.v2;aadA16*	-	-	qnrS1	-	catA1^;catII.2*	arr-3	sul1;sul2?	-	-	dfrA27	TEM-1D.v1^	-	SHV-11^	35Q	-	-	-	KL25	K25	?2!	Typeable	99.67%	-	O5	O5	-	Typeable
613114	2018-08-06	Kenya	Swab	ST101	no	no	SAMN54588606	-	0	-	0	-	0	-	0	-	0	-	-	-	CTX-M-15	strA.v1^;strB.v1	-	-	qnrS1	-	-	-	sul2	tet(A).v1	-	dfrA14.v2*	TEM-1D.v1^	-	SHV-1^	-	-	-	-	KL17	K17	-	Typeable	99.99%	-	O1/O2v1	O1ab	-	Typeable
613178	2018-10-16	Kenya	Swab	ST336	no	no	SAMN54588607	-	0	-	0	-	0	-	0	-	0	-	-	-	CTX-M-15	aph3-Ia.v1^;strA.v1^;strB.v1?	-	-	-	Mrx;mphA	-	-	sul2*	-	-	dfrA14.v2*	-	TEM-30	SHV-11^	35Q	-	-	-	KL25	K25	!	Typeable	99.65%	-	O5	O5	-	Typeable
613187	2018-05-11	Kenya	Swab	ST15	no	no	SAMN54588608	-	0	-	0	-	0	-	0	-	0	-	-	-	CTX-M-15	aac(3)-IIa.v1^;aac(6')-Ib-cr.v2;aadA*;aadA2^;aph(3')-Ia*;strA.v1*;strB.v1*	-	-	-	Mrx;mphA	floR.v2*	arr-2	sul1;sul2	tet(D)	-	dfrA12;dfrA14.v2*	OXA-1;OXA-10	-	SHV-28^	-	OmpK35-64%	-	GyrA-83F;GyrA-87A;ParC-80I	KL24	Capsule null	!	Typeable	99.98%	-	O1/O2v1	O1ab	-	Typeable
613196	2018-07-12	Kenya	Swab	ST3692	no	no	SAMN54588609	-	0	-	0	-	0	-	0	-	0	-	-	-	-	-	-	-	-	-	-	-	-	-	-	-	-	-	SHV-71	146V	-	-	-	KL8	K8	-	Typeable	99.75%	-	O1/O2v2	O2afg	-	Typeable
613211	2018-06-07	Kenya	Swab	ST307	no	no	SAMN54588610	ybt 9; ICEKp3	183	-	0	-	0	-	0	-	0	-	-	-	CTX-M-15	aac(3)-IIa.v1^;aac(6')-Ib-cr.v2;strA.v1^;strB.v1	-	-	qnrB1.v2^	-	-	-	sul2	tet(A).v1	-	dfrA14.v2*	OXA-1;TEM-1D.v1^	-	SHV-28^	-	-	-	GyrA-83I;ParC-80I	KL102	unknown (KL102)	-	Typeable	99.66%	-	O1/O2v2	O2afg	-	Typeable
613275	2018-04-16	Kenya	Swab	ST607	no	no	SAMN54588611	ybt 14; ICEKp12	586	-	0	-	0	-	0	-	0	-	-	-	CTX-M-15	aac(3)-IIa.v1;aac(6')-Ib-cr.v2;aadA16*;strB.v1	-	-	qnrB6^	-	catII.2*	arr-3	sul1;sul2	tet(D)	-	dfrA27	SCO-1;TEM-1D.v1^	-	SHV-1^	-	-	-	-	KL25	K25	!	Typeable	99.69%	-	O1/O2v1	O1ab	-	Typeable
613318	2018-06-05	Kenya	Swab	ST14	no	no	SAMN54588612	ybt 9; ICEKp3	183-2LV	-	0	-	0	-	0	-	0	-	-	-	CTX-M-15	aac(3)-IIa.v1^;aac(6')-Ib-cr.v2;strA.v1^;strB.v1	-	-	-	-	-	-	sul2	-	-	dfrA14.v2*	OXA-1;TEM-1D.v1^	-	SHV-28^	-	-	-	-	KL2	K2	-	Typeable	99.83%	-	O1/O2v1	O1ab	?2	Typeable
613381	2018-07-04	Kenya	Swab	ST3717	no	no	SAMN54588613	-	0	-	0	-	0	-	0	-	0	-	-	-	CTX-M-15	strA.v1*;strB.v1*	-	-	qnrB6^	-	catII.2*	arr-3	sul1;sul2	-	-	dfrA27	TEM-1D.v1^	-	SHV-1^	-	-	-	-	KL57	K57	!	Typeable	99.53%	-	O1/O2v2	O1ab	-	Typeable
613390	2018-07-09	Kenya	Pus	ST607	no	no	SAMN54588614	ybt 14; ICEKp12	586	-	0	-	0	-	0	-	0	-	-	-	CTX-M-15	aac(3)-IIa.v1;strB.v1*	-	-	qnrB6^	-	catII.2*	arr-3	sul1;sul2	tet(D)	-	dfrA27	TEM-1D.v1^	-	SHV-1^	-	-	-	-	KL25	K25	!	Typeable	99.69%	-	O1/O2v1	O1ab	-	Typeable
613433	2018-07-25	Kenya	Swab	ST336	no	no	SAMN54588615	ybt 15; ICEKp11	230-1LV	-	0	-	0	-	0	-	0	-	-	-	CTX-M-15	aac(3)-IIa.v1^;aac(6')-Ib-cr.v2;aph3-Ia.v1^;strA.v1^;strB.v1	-	-	qnrB1.v2^	Mrx;mphA	-	-	sul2*	tet(A).v1	-	dfrA14.v2*	OXA-1;TEM-1D.v1^	-	SHV-11^	35Q	-	-	-	KL111	unknown (KL111)	-	Typeable	99.71%	-	O3b	O3b	-	Typeable
613442	2018-07-25	Kenya	Swab	ST336	no	no	SAMN54588616	ybt 15; ICEKp11	230-1LV	-	0	-	0	-	0	-	0	-	-	-	CTX-M-15	aac(3)-IIa.v1^;aac(6')-Ib-cr.v2;aph3-Ia.v1^;strA.v1^;strB.v1	-	-	qnrB1.v2^	Mrx;mphA	-	-	sul2	tet(A).v1	-	dfrA14.v2*	OXA-1;TEM-1D.v1^	-	SHV-11^	35Q	-	-	-	KL111	unknown (KL111)	-	Typeable	99.71%	-	O3b	O3b	-	Typeable
613512	2018-08-13	Kenya	Pus	ST711	no	no	SAMN54588617	ybt 15; ICEKp11	273-2LV	-	0	-	0	-	0	-	0	-	-	-	CTX-M-15	aac(6')-Ib-cr.v2;strA.v1^;strB.v1	-	-	qnrB1.v2^	-	-	-	sul2	tet(A).v1	-	dfrA14.v2*	OXA-1;TEM-1D.v1^	-	SHV-187	-	-	-	-	KL54	K54	-	Typeable	99.94%	-	O1/O2v2	O1ab	-	Typeable
613682	2018-04-12	Kenya	Environmental	ST15	no	no	SAMN54588618	ybt 9; ICEKp3	183-1LV	-	0	-	0	-	0	-	0	-	-	NDM-1	CTX-M-15	aac(3)-IIa.v1^;aac(3)-IId^;aac(6')-Ib-cr.v2;aac(6')-Ib-cr.v2^;aadA*;aadA2^;aph3-Ia.v1;rmtB;strA.v1^;strB.v1	-	-	qnrB4	Mrx;ereA2*;mphA	catII.2*;cmlA5	arr-3	-	tet(A).v1;tet(G).v1	-	dfrA12;dfrA14.v2*	DHA-1;OXA-1;TEM-1D.v1^	-	SHV-28^	-	OmpK35-87%	-	GyrA-83F;GyrA-87A;ParC-80I	KL112	unknown (KL112)	-	Typeable	99.53%	-	O1/O2v1	O1ab	-	Typeable
613691	2018-04-12	Kenya	Environmental	ST15	no	no	SAMN54588619	ybt 9; ICEKp3	183-1LV	-	0	-	0	-	0	-	0	-	-	NDM-1	CTX-M-15	aac(3)-IId^;aac(6')-Ib-cr.v2^;aadA*;aadA2^;aph3-Ia.v1;rmtB;strA.v1^;strB.v1	-	-	qnrB4	ereA2*	catII.2*;cmlA5	-	sul2*	tet(A).v1;tet(G).v1	-	dfrA12;dfrA14.v2*	DHA-1;TEM-1D.v1^	-	SHV-28^	-	OmpK35-87%	-	GyrA-83F;GyrA-87A;ParC-80I	KL112	unknown (KL112)	-	Typeable	99.53%	-	O1/O2v1	O1ab	-	Typeable
613707	2018-04-12	Kenya	Environmental	ST15	no	no	SAMN54588620	ybt 9; ICEKp3	183-1LV	-	0	-	0	-	0	-	0	-	-	NDM-1	CTX-M-15	aac(3)-IId^;aac(6')-Ib-cr.v2^;aadA*;aadA2^;aph3-Ia.v1;rmtB;strA.v1^;strB.v1	-	-	qnrB4	ereA2*	catII.2*;cmlA5	-	sul2^	tet(A).v1;tet(G).v1	-	dfrA12;dfrA14.v2*	DHA-1;TEM-1D.v1^	-	SHV-28^	-	OmpK35-87%	-	GyrA-83F;GyrA-87A;ParC-80I	KL112	unknown (KL112)	-	Typeable	99.53%	-	O1/O2v1	O1ab	-	Typeable
613716	2018-04-12	Kenya	Environmental	ST15	no	no	SAMN54588621	ybt 9; ICEKp3	183-1LV	-	0	-	0	-	0	-	0	-	-	NDM-1	CTX-M-15	aac(3)-IId^;aac(6')-Ib-cr.v2^;aadA2^;aph3-Ia.v1;rmtB;strA.v1^;strB.v1	-	-	qnrB4	-	catII.2*	arr-3	sul2^	tet(A).v1;tet(G).v1	-	dfrA12;dfrA14.v2*	DHA-1;TEM-1D.v1^	-	SHV-28^	-	OmpK35-87%	-	GyrA-83F;GyrA-87A;ParC-80I	KL112	unknown (KL112)	-	Typeable	99.53%	-	O1/O2v1	O1ab	-	Typeable
613725	2018-04-12	Kenya	Environmental	ST15	no	no	SAMN54588622	ybt 9; ICEKp3	183-1LV	-	0	-	0	-	0	-	0	-	-	NDM-1	CTX-M-15	aac(3)-IId^;aac(6')-Ib-cr.v2^;aadA2^;aph3-Ia.v1;rmtB;strA.v1^;strB.v1*	-	-	qnrB4	-	catII.2*	arr-3	sul2*	tet(A).v1;tet(G).v1	-	dfrA12;dfrA14.v2*	DHA-1;TEM-1D.v1^	-	SHV-28^	-	OmpK35-87%	-	GyrA-83F;GyrA-87A;ParC-80I	KL112	unknown (KL112)	-	Typeable	99.53%	-	O1/O2v1	O1ab	-	Typeable
613804	2018-04-12	Kenya	Environmental	ST14	no	no	SAMN54588623	-	0	-	0	-	0	-	0	-	0	-	-	-	CTX-M-15	-	-	-	qnrB6^	-	catII.2*	arr-3	sul1;sul2	tet(D)	-	dfrA27	-	-	SHV-28^	-	-	-	-	KL2	K2	-	Typeable	99.84%	-	O1/O2v1	O1ab	-	Typeable
613813	2018-04-12	Kenya	Environmental	ST14	no	no	SAMN54588624	-	0	-	0	-	0	-	0	-	0	-	-	-	CTX-M-15	-	-	-	qnrB6^	-	catII.2*	arr-3	sul1;sul2	tet(D)	-	dfrA27	-	-	SHV-28^	-	-	-	-	KL2	K2	-	Typeable	99.84%	-	O1/O2v1	O1ab	-	Typeable
613877	2018-04-22	Kenya	Environmental	ST29	no	no	SAMN54588625	-	0	-	0	-	0	-	0	-	0	-	-	-	CTX-M-15	aac(6')-Ib-cr.v2;strA.v1^;strB.v1	-	-	qnrB1.v2^	Mrx;mphA	-	-	sul2	tet(A).v1	-	dfrA14.v2*	OXA-1;TEM-103*?	-	SHV-187	-	-	-	-	KL30	K30	!	Typeable	97.80%	-	O1/O2v2	O1ab	-	Typeable
613886	2018-04-22	Kenya	Environmental	ST14	no	no	SAMN54588626	-	0	-	0	-	0	-	0	-	0	-	-	-	CTX-M-15	-	-	-	qnrB6^	-	-	arr-3	sul1;sul2	-	-	dfrA27	-	-	SHV-28^	-	-	-	-	KL2	Capsule null	!	Typeable	99.85%	-	O1/O2v1	O1ab	-	Typeable
613938	2018-06-13	Kenya	Environmental	ST307	no	no	SAMN54588627	ybt 16; ICEKp12	287	-	0	-	0	-	0	-	0	-	-	-	CTX-M-15	aac(3)-IIa.v1^;strA.v1*;strB.v1*	-	-	qnrB6^	-	catII.2*	arr-3	sul1;sul2	tet(D)	-	dfrA27	TEM-1D.v1^	-	SHV-28^	-	OmpK35-32%	-	GyrA-83I;ParC-80I	KL102	unknown (KL102)	-	Typeable	99.66%	-	O1/O2v2	O2afg	-	Typeable
613992	2018-06-13	Kenya	Environmental	ST4868	no	no	SAMN54588628	-	0	-	0	-	0	-	0	-	0	-	-	-	CTX-M-15	aac(3)-IId^;aac(6')-Ib-cr.v2^;aadA*;sat-2;strA.v1^;strB.v1	-	-	qnrB4	-	-	arr-3	sul1*;sul2*	tet(A).v1	-	dfrA1.v1	DHA-1	-	SHV-11^	35Q	-	-	-	KL153	unknown (KL153)	-	Typeable	99.96%	-	O1/O2v2	O2afg	-	Typeable
614016	2018-06-13	Kenya	Environmental	ST15	no	no	SAMN54588629	ybt 9; ICEKp3	183-1LV	-	0	-	0	-	0	-	0	-	-	-	CTX-M-15	aac(3)-IIa.v1^;aac(6')-Ib-cr.v2;aadA*	-	-	-	ereA2*	cmlA5	arr-2	sul1*	-	-	dfrA14.v2*	OXA-1	-	SHV-28^	-	OmpK35-87%	-	GyrA-83F;GyrA-87A;ParC-80I	KL112	unknown (KL112)	?2	Typeable	99.55%	-	O1/O2v1	O1ab	-	Typeable
614034	2018-06-22	Kenya	Environmental	ST101	no	no	SAMN54588630	-	0	-	0	-	0	-	0	-	0	-	-	-	CTX-M-15	strA.v1^;strB.v1	-	-	qnrS1	-	-	-	sul2	tet(A).v1	-	dfrA14.v2*	TEM-1D.v1^	-	SHV-1^	-	-	-	-	KL17	K17	-	Typeable	99.99%	-	O1/O2v1	O1ab	-	Typeable
614052	2018-06-22	Kenya	Environmental	ST789	no	no	SAMN54588631	-	0	-	0	-	0	-	0	-	0	-	-	-	CTX-M-15	aac(6')-Ib-cr.v2;aadA^	-	-	qnrS1	-	-	-	sul1^	-	-	dfrA15.v2	OXA-1;TEM-1D.v1	-	SHV-25	35Q	-	-	-	KL18	K18	-	Typeable	99.81%	-	O1/O2v1	O1ab	-	Typeable
614131	2018-09-19	Kenya	Environmental	ST14	no	no	SAMN54588632	ybt 9; ICEKp3	183-2LV	-	0	-	0	-	0	-	0	-	-	-	CTX-M-15	aac(3)-IIa.v1^;aac(6')-Ib-cr.v2;strA.v1^;strB.v1	-	-	-	-	-	-	sul2	-	-	dfrA14.v2*	OXA-1;TEM-1D.v1^	-	SHV-28^	-	OmpK35-17%	-	-	KL2	K2	-	Typeable	99.84%	-	O1/O2v1	O1ab	-	Typeable
614201	2018-09-26	Kenya	Environmental	ST1838	no	no	SAMN54588633	-	0	-	0	-	0	-	0	-	0	-	-	-	CTX-M-15	aac(2')-IIa*	-	-	-	-	-	-	-	-	-	-	-	-	SHV-11^	35Q	-	-	-	KL14	K14	-	Typeable	99.86%	-	O3b	O3b	-	Typeable
614274	2018-09-26	Kenya	Environmental	ST15	no	no	SAMN54588634	-	0	-	0	-	0	-	0	-	0	-	-	-	CTX-M-15	aac(3)-IIa.v1^;aac(6')-Ib-cr.v2;strA.v1^;strB.v1	-	-	-	-	-	-	sul2	-	-	dfrA14.v2*	OXA-1;TEM-1D.v1^	-	SHV-28^	-	-	-	GyrA-83F;GyrA-87A;ParC-80I	KL112	unknown (KL112)	-	Typeable	99.51%	-	O1/O2v1	O1ab	-	Typeable
614450	2018-03-15	Kenya	Environmental	ST35	no	no	SAMN54588635	ybt 8; ICEKp9 (truncated)	195-1LV	-	0	-	0	-	0	-	0	-	-	-	CTX-M-15	aac(3)-IIa.v1	-	-	-	-	-	-	-	-	-	-	TEM-1D.v1^	-	SHV-33	-	-	-	-	KL16	K16	-	Typeable	99.73%	-	O1/O2v1	O1ab	-	Typeable
618864	2018-07-25	Kenya	Swab	ST336	no	no	SAMN54588636	ybt 15; ICEKp11	230-1LV	-	0	-	0	-	0	-	0	-	-	-	CTX-M-15	aac(3)-IIa.v1^;aac(6')-Ib-cr.v2;aph3-Ia.v1^;strA.v1^;strB.v1	-	-	qnrB1.v2^	Mrx;mphA	-	-	sul2	tet(A).v1	-	dfrA14.v2*	OXA-1;TEM-1D.v1^	-	SHV-11^	35Q	-	-	-	KL111	unknown (KL111)	?2!	Typeable	99.69%	-	O3b	O3b	-	Typeable
618872	2018-07-25	Kenya	Swab	ST336	no	no	SAMN54588637	ybt 15; ICEKp11	230-1LV	-	0	-	0	-	0	-	0	-	-	-	CTX-M-15	aac(3)-IIa.v1^;aac(6')-Ib-cr.v2;aph3-Ia.v1^;strA.v1^;strB.v1	-	-	qnrB1.v2^	Mrx;mphA	-	-	sul2	tet(A).v1	-	dfrA14.v2*	OXA-1;TEM-1D.v1^	-	SHV-11^	35Q	-	-	-	KL111	unknown (KL111)	?2	Typeable	99.72%	-	O3b	O3b	-	Typeable
618928	2018-05-11	Kenya	Swab	ST15	no	no	SAMN54588638	ybt 9; ICEKp3	183-2LV	-	0	-	0	-	0	-	0	-	-	-	-	aac(3)-IIa.v1^;aadA*;aph(3')-Ia*	-	-	-	-	floR.v2*	arr-2	sul1;sul2	-	-	dfrA14.v2*	OXA-10	-	SHV-28^	-	OmpK35-64%	-	GyrA-83F;GyrA-87A;ParC-80I	KL104	unknown (KL104)	?3-	Untypeable	98.58%	KL104_04_wza;KL104_06_wzc;KL104_15_wecB;KL104_07;KL104_12;KL104_19_rfbp;KL104_05_wzb;KL104_14;KL104_03_wzi;KL104_10;KL104_13;KL104_20_gnd;KL104_11;KL104_21_manC;KL104_18;KL104_09_wzx;KL104_08_wzx	O1/O2v1	O1ab	-	Typeable
618936	2018-04-16	Kenya	Swab	ST607	no	no	SAMN54588639	ybt 14; ICEKp12	586	-	0	-	0	-	0	-	0	-	-	-	CTX-M-15	aac(3)-IIa.v1;aac(6')-Ib-cr.v2;aadA16*;strB.v1*	-	-	qnrB6^	-	catII.2*	arr-3	sul1;sul2	tet(D)	-	dfrA27	SCO-1;TEM-1D.v1^	-	SHV-1^	-	-	-	-	KL25	K25	?2!	Typeable	99.71%	-	O1/O2v1	O1ab	-	Typeable
619166	2018-06-22	Kenya	Environmental	ST789	no	no	SAMN54588640	-	0	-	0	-	0	-	0	-	0	-	-	-	CTX-M-15	aac(6')-Ib-cr.v2;aadA^	-	-	qnrS1	-	-	-	sul1^	-	-	dfrA15.v2	OXA-1;TEM-1D.v1	-	SHV-25	35Q	-	-	-	KL18	K18	?2	Typeable	99.82%	-	O1/O2v1	O1ab	-	Typeable
619204	2018-04-12	Kenya	Environmental	ST14	no	no	SAMN54588641	-	0	-	0	-	0	-	0	-	0	-	-	-	CTX-M-15	-	-	-	qnrB6^	-	catII.2*	arr-3	sul1;sul2	tet(D)	-	dfrA27	-	-	SHV-28^	-	-	-	-	KL2	K2	-	Typeable	99.84%	-	O1/O2v1	O1ab	-	Typeable
619212	2018-04-12	Kenya	Environmental	ST14	no	no	SAMN54588642	-	0	-	0	-	0	-	0	-	0	-	-	-	CTX-M-15	-	-	-	qnrB6^	-	catII.2*	arr-3	sul1;sul2	tet(D)	-	dfrA27	-	-	SHV-28^	-	-	-	-	KL2	K2	?2	Typeable	99.85%	-	O1/O2v1	O1ab	-	Typeable
619220	2018-04-12	Kenya	Environmental	ST15	no	no	SAMN54588643	ybt 9; ICEKp3	183-1LV	-	0	-	0	-	0	-	0	-	-	NDM-1	CTX-M-15	aac(3)-IId^;aac(6')-Ib-cr.v2^;aadA*;aadA2^;aph3-Ia.v1;rmtB;strA.v1*;strB.v1*	-	-	qnrB4	Mrx;ereA2*;mphA	catII.2*;cmlA5	-	sul2	tet(A).v1;tet(G).v1	-	dfrA12;dfrA14.v2*	DHA-1;TEM-1D.v1^	-	SHV-28^	-	OmpK35-87%	-	GyrA-83F;GyrA-87A;ParC-80I	KL112	unknown (KL112)	-	Typeable	99.53%	-	O1/O2v1	O1ab	-	Typeable
619238	2018-04-12	Kenya	Environmental	ST15	no	no	SAMN54588644	ybt 9; ICEKp3	183-1LV	-	0	-	0	-	0	-	0	-	-	NDM-1	CTX-M-15	aac(3)-IId^;aac(6')-Ib-cr.v2^;aadA*;aadA2^;aph3-Ia.v1;rmtB;strA.v1*;strB.v1	-	-	qnrB4	Mrx;ereA2*;mphA	catII.2*;cmlA5	-	sul2	tet(A).v1;tet(G).v1	-	dfrA12;dfrA14.v2*	DHA-1;TEM-1D.v1^	-	SHV-28^	-	OmpK35-87%	-	GyrA-83F;GyrA-87A;ParC-80I	KL112	unknown (KL112)	?2	Typeable	99.55%	-	O1/O2v1	O1ab	-	Typeable
702229	2018-11-05	Kenya	Wound	ST218	yes	no	SAMN54588734	ybt 10; ICEKp4	89-2LV	-	0	iuc 1	78	iro 1	1-1LV	rmp 1; KpVP-1 (truncated)	126-1LV	rmpA2_2*-47%	peg-344	-	CTX-M-15	aac(3)-IId^;aac(6')-Ib-cr.v2^;aadA2^;aph3-Ia.v1;rmtB;strA.v1^;strB.v1	-	-	-	-	catII.2*	arr-3	sul2*	tet(A).v1;tet(G).v1	-	dfrA12	TEM-1D.v1^	-	SHV-1^	-	-	-	-	KL57	K57	-	Typeable	99.52%	-	O1/O2v2	O2afg	-	Typeable
918571	2021-03-15	Kenya	Wound	ST111	no	no	SAMN54589397	ybt 13; ICEKp2	464	-	0	-	0	-	0	-	0	-	-	-	-	aadA2	-	-	-	-	-	-	sul1*;sul2	tet(D)	-	dfrA16.v2	-	-	SHV-11^	35Q	-	-	-	KL63	K63	-	Typeable	99.77%	-	O1/O2v2	O1ab	-	Typeable
918651	2021-05-24	Kenya	Wound	ST1307	no	no	SAMN54589401	-	0	-	0	-	0	-	0	-	0	-	-	-	CTX-M-15	aac(3)-IIa.v1^;strA.v1^;strB.v1	-	-	qnrB6^	-	-	arr-3	sul1;sul2	tet(D)	-	dfrA27	OXA-1;TEM-1D.v1^	-	SHV-1^	-	-	-	-	KL127	unknown (KL127)	?5	Typeable	100.00%	-	OL13	O13	?7+!	Typeable
701573	2018-04-16	Kenya	Urine	ST107	no	no	SAMN54588728	-	0	-	0	-	0	-	0	-	0	-	-	-	-	aadA2^;strA.v1;strB.v1	-	-	qnrS1	-	-	-	sul1;sul2	tet(A).v1	-	dfrA12	LAP-2	-	SHV-1^	-	-	-	-	KL3	K3	!	Typeable	99.72%	-	O1/O2v2	O1ab	-	Typeable
702287	2019-05-09	Kenya	Wound	ST14	no	no	SAMN54588740	ybt 14; ICEKp5	135	-	0	-	0	-	0	-	0	-	-	-	CTX-M-15	aac(3)-IId^	-	-	-	-	catII.2*	-	sul2	-	-	dfrA30*	TEM-1D.v1^	-	SHV-28^	-	-	-	-	KL2	K2	-	Typeable	99.82%	-	O1/O2v1	O1ab	-	Typeable
824868	2020-01-08	Kenya	Wound	ST17	no	no	SAMN54588991	-	0	-	0	-	0	-	0	-	0	-	-	-	CTX-M-15	strA.v1^;strB.v1	-	-	-	Mrx;mphA	-	-	sul2	-	-	dfrA14.v2*	TEM-1D.v1^	-	SHV-11^	35Q	-	-	-	KL23	K23	-	Typeable	99.94%	-	O1/O2v2	O2afg	-	Typeable
702253	2019-03-06	Kenya	Wound	ST1411	no	no	SAMN54588737	-	0	-	0	-	0	-	0	-	0	-	-	-	CTX-M-15	aac(3)-IIa.v1;aadA^;strB.v1	-	-	-	-	catA1*	-	sul1^;sul2	tet(A).v1	-	dfrA15.v2	SCO-1;TEM-1D.v1^	-	SHV-11^	35Q	-	-	-	KL61	K61	?3	Typeable	98.45%	-	O5	O5	?3	Typeable
824818	2019-11-27	Kenya	Wound	ST147	no	no	SAMN54588990	ybt 9; ICEKp3	173-3LV	-	0	-	0	-	0	-	0	-	-	NDM-1	CTX-M-15	aadA*;aph(3')-VI	-	-	qnrS1	-	catB3.v2	arr-3	sul1	-	-	-	OXA-1;OXA-9.v1	-	SHV-11^	35Q	OmpK35-25%	-	GyrA-83I;ParC-80I	KL64	K64	-	Typeable	100.00%	-	O1/O2v1	O2a	-	Typeable
918635	2021-01-21	Kenya	Wound	ST2816	no	no	SAMN54589400	-	0	-	0	-	0	-	0	-	0	-	-	-	-	aph3-Ia.v1^;strA.v1^;strB.v1	-	-	-	-	catA1^	-	sul2*	tet(A).v1	-	dfrA7	TEM-1D.v1^	-	SHV-11^	35Q	-	-	-	KL30	K30	!	Typeable	97.43%	-	O1/O2v1	O1ab	-	Typeable
918765	2021-03-08	Kenya	Urine	ST297	no	no	SAMN54589404	-	0	-	0	-	0	-	0	-	0	-	-	-	-	-	-	-	-	-	-	-	-	-	-	-	-	-	SHV-220	-	-	-	-	KL10	K10	-	Typeable	98.64%	-	O1/O2v1	O1ab	-	Typeable
918601	2021-05-11	Kenya	Wound	ST348	no	no	SAMN54589399	ybt 14; ICEKp5	595	-	0	-	0	-	0	-	0	-	-	-	CTX-M-15	aac(3)-IIa.v1;aph3-Ia.v1^;strA.v1^;strB.v1	-	-	-	Mrx;mphA^	-	-	sul2*	-	-	dfrA14.v2*	TEM-1D.v1^	-	SHV-11^	35Q	-	-	-	KL23	K23	-	Typeable	99.93%	-	O1/O2v1	O1ab	-	Typeable
918723	2021-05-24	Kenya	Wound	ST39	no	no	SAMN54589403	ybt 14; ICEKp5	595	-	0	-	0	-	0	-	0	-	-	-	CTX-M-15	aadA2^	-	-	-	Mrx;mphA	-	-	sul1	-	-	dfrA12;dfrA15.v2	TEM-1D.v1^	-	SHV-1^	-	-	-	-	KL23	K23	-	Typeable	99.94%	-	O1/O2v2	O2afg	-	Typeable
824906	2020-02-18	Kenya	Urine	ST219	no	no	SAMN54588993	ybt 14; ICEKp5	354	-	0	-	0	-	0	-	0	-	-	-	CTX-M-15	aac(3)-IIa.v1^;aac(6')-Ib-cr.v2;aadA2^;strA.v1*;strB.v1*	-	-	qnrS1	Mrx;mphA	catII.2*	-	sul1;sul2	-	-	dfrA12	OXA-1	-	SHV-1^	-	-	-	-	KL114	unknown (KL114)	-	Typeable	99.85%	-	O1/O2v1	O1ab	-	Typeable
918483	2020-12-17	Kenya	Wound	ST234	no	no	SAMN54589395	-	0	-	0	-	0	-	0	-	0	-	-	-	CTX-M-14	aadA2^;aph3-Ia.v1^	-	-	qnrB4	Mrx;mphA	-	-	sul1	tet(D)	-	dfrA12	DHA-1	-	SHV-27	156D	-	-	-	KL122	unknown (KL122)	-	Typeable	99.90%	-	O1/O2v2	O1ab	-	Typeable
824884	2020-01-31	Kenya	Urine	ST37	no	no	SAMN54588992	-	0	-	0	-	0	-	0	-	0	-	-	-	-	strA.v1^;strB.v1	-	-	-	-	catII.2*	-	sul2	tet(D)	-	-	TEM-1D.v1^	-	SHV-11^	35Q	-	-	-	KL118	unknown (KL118)	?3	Typeable	99.98%	-	OL13	O13	?4!	Typeable
918505	2021-03-01	Kenya	Wound	ST15	no	no	SAMN54589396	ybt 10; ICEKp4	17-2LV	-	0	-	0	-	0	-	0	-	-	NDM-5	CTX-M-15	aadA2^;rmtB;strA.v1^;strB.v1	-	-	qnrB1.v2^	Mrx;ermB.v1*;mphA*	-	-	sul1;sul2	tet(A).v1	-	dfrA12;dfrA14.v2*	TEM-1D.v1^	-	SHV-28^	-	-	-	GyrA-83F;GyrA-87A;ParC-80I	KL112	unknown (KL112)	-	Typeable	99.53%	-	O1/O2v1	O1ab	-	Typeable
918811	2021-02-28	Kenya	Wound	ST15	no	no	SAMN54589405	ybt 10; ICEKp4	17-2LV	-	0	-	0	-	0	-	0	-	-	NDM-5	CTX-M-15	aadA2^;rmtB;strA.v1^;strB.v1	-	-	qnrB1.v2^	Mrx;ermB.v1*;mphA*	-	-	sul1;sul2	tet(A).v1	-	dfrA12;dfrA14.v2*	TEM-1D.v1^	-	SHV-28^	-	-	-	GyrA-83F;GyrA-87A;ParC-80I	KL112	unknown (KL112)	-	Typeable	99.53%	-	O1/O2v1	O1ab	-	Typeable
832740	2016-03-09	Kenya	Wound	ST15	no	no	SAMN54589004	ybt 9; ICEKp3 (truncated)	183-2LV	-	0	-	0	-	0	-	0	-	-	-	CTX-M-15	aac(3)-IIa.v1^;aac(6')-Ib-cr.v2;aadA2^;strA.v1*;strB.v1*	-	-	-	Mrx;mphA	-	-	sul1;sul2	tet(D)	-	dfrA12;dfrA14.v2*	OXA-1	-	SHV-28^	-	OmpK35-64%	-	GyrA-83F;GyrA-87A;ParC-80I	KL24	Capsule null	!	Typeable	99.98%	-	O1/O2v1	O1ab	-	Typeable
702203	2019-07-08	Kenya	Wound	ST1626	no	no	SAMN54588732	-	0	-	0	-	0	-	0	-	0	-	-	-	CTX-M-15	aac(3)-IIa.v1^;aac(6')-Ib-cr.v2;aadA*;sat-2;strA.v1^;strB.v1	-	-	qnrA1^	-	catA1^	arr-2	sul1;sul2	tet(A).v1	-	dfrA1.v1;dfrA14.v2*	OXA-1;OXA-10;TEM-1D.v1^	SHV-52	-	35Q;69I	-	-	-	KL151	unknown (KL151)	-	Typeable	100.00%	-	O5	O5	-	Typeable
702295	2019-04-15	Kenya	Urine	ST1801	no	no	SAMN54588741	-	0	-	0	-	0	-	0	-	0	-	-	-	CTX-M-15	aac(3)-IIa.v1^;aac(6')-Ib-cr.v2;strA.v1^;strB.v1	-	-	qnrB1.v2^	-	-	-	sul2	tet(A).v1	-	dfrA14.v2*	OXA-1	-	SHV-11^	35Q	-	-	-	KL35	K35	-	Typeable	99.69%	-	O1/O2v1	O1ab	-	Typeable
825022	2019-10-31	Kenya	Wound	ST1927	no	no	SAMN54588997	ybt 15; ICEKp11	230	-	0	-	0	-	0	-	0	-	-	-	CTX-M-15	aac(3)-IIa.v1^;aac(6')-Ib-cr.v2;aadA2^	-	-	qnrS1	Mrx	-	-	sul1;sul2	-	-	dfrA12	TEM-1D.v1^	-	SHV-11^	35Q	-	-	-	KL2	K2	-	Typeable	99.56%	-	O1/O2v2	O1ab	-	Typeable
825160	2019-11-26	Kenya	Urine	ST198	no	no	SAMN54588999	-	0	-	0	-	0	-	0	-	0	-	-	-	-	strA.v1^;strB.v1	-	-	-	-	-	-	sul2	tet(D)	-	dfrA14.v2*	TEM-1D.v1^	-	SHV-77^	35Q	-	-	-	KL62	K62	-	Typeable	99.91%	-	O1/O2v1	O1ab	-	Typeable
702333	2019-02-04	Kenya	Wound	ST219	no	no	SAMN54588744	ybt 14; ICEKp5	354-1LV	-	0	-	0	-	0	-	0	-	-	NDM-1	CTX-M-15	aac(6')-Ib3^;aadA2^;aph3-Ia.v1^;rmtC;strA.v1*;strB.v1*	-	-	qnrS1	Mrx;mphA	floR.v2*	-	sul1;sul2	tet(A).v1	-	dfrA12	CMY-6*	-	SHV-1^	-	-	-	-	KL114	unknown (KL114)	-	Typeable	99.85%	-	O1/O2v1	O1ab	-	Typeable
701871	2019-07-01	Kenya	Wound	ST2279	no	no	SAMN54588729	-	0	-	0	-	0	-	0	-	0	-	-	-	CTX-M-15	aac(3)-IIa.v1^;aac(6')-Ib-cr.v2;strA.v1^;strB.v1	-	-	qnrB1.v2^	-	-	-	sul2	tet(A).v1	-	dfrA14.v2*	OXA-1;TEM-1D.v1^	-	SHV-1^	-	-	-	-	KL3	K3	!	Typeable	99.52%	-	O1/O2v2	O2afg	-	Typeable
825224	2019-03-04	Kenya	Wound	ST25	no	no	SAMN54589000	-	0	-	0	-	0	-	0	-	0	-	-	-	-	strA.v1;strB.v1	-	-	-	-	-	-	sul1;sul2	tet(D)	-	dfrA15.v2	-	-	SHV-11^	35Q	-	-	-	KL2	K2	-	Typeable	99.55%	-	O1/O2v2	O1ab	-	Typeable
702237	2019-01-29	Kenya	Wound	ST307	no	no	SAMN54588735	-	0	-	0	-	0	-	0	-	0	-	-	-	CTX-M-15	aac(3)-IIa.v1^;aac(6')-Ib-cr.v2;strA.v1^;strB.v1	-	-	qnrB1.v2^	-	-	-	sul2	tet(A).v1	-	dfrA14.v2*	OXA-1;TEM-1D.v1^	-	SHV-28^	-	-	-	GyrA-83I;ParC-80I	KL102	unknown (KL102)	-	Typeable	99.66%	-	O1/O2v2	O2afg	-	Typeable
918677	2019-10-30	Kenya	Wound	ST3483	no	no	SAMN54589402	-	0	-	0	-	0	-	0	-	0	-	-	-	CTX-M-15	aac(6')-Ib-cr.v2;strA.v1^;strB.v1	-	-	qnrB1.v2^	-	-	-	sul2	tet(A).v1	-	dfrA14.v2*	OXA-1;TEM-1D.v1^	-	SHV-1^	-	-	-	-	KL18	K18	-	Typeable	99.85%	-	O1/O2v1	O1ab	-	Typeable
702181	2019-06-18	Kenya	Wound	ST35	no	no	SAMN54588730	ybt 14; ICEKp5	354-2LV	-	0	-	0	-	0	-	0	-	-	-	CTX-M-15;TEM-169^	strA.v1^;strB.v1	-	-	qnrB1.v2^	-	-	-	sul2	tet(A).v1	-	dfrA14.v2*	-	-	SHV-33*	-	-	-	-	KL108	unknown (KL108)	-	Typeable	99.25%	-	O1/O2v2	O1ab	-	Typeable
918589	2021-03-25	Kenya	Wound	ST45	no	no	SAMN54589398	ybt 10; ICEKp4	78-2LV	-	0	-	0	-	0	-	0	-	-	-	-	strA.v1*;strB.v1*	-	-	-	-	catII.2*	-	sul2	-	-	dfrA14.v2*	TEM-1D.v1^	-	SHV-1	-	-	-	-	KL5	K5	?3	Typeable	99.35%	-	O3b	O3b	?2	Typeable
825128	2020-03-18	Kenya	Urine	ST48	no	no	SAMN54588998	ybt 9; ICEKp3	193	-	0	-	0	-	0	-	0	-	-	-	CTX-M-15	aac(3)-IIa.v1;strA.v1^;strB.v1	-	-	-	Mrx;mphA	-	-	sul2^	-	-	-	SCO-1;TEM-1D.v1^	-	SHV-11^	35Q	-	-	-	KL62	K62	?2!	Typeable	99.82%	-	O1/O2v1	O1ab	-	Typeable
825006	2018-06-27	Kenya	Wound	ST3609	no	no	SAMN54588996	-	0	-	0	-	0	-	0	-	0	-	-	-	-	strA.v1;strB.v1	-	-	-	-	-	-	sul1;sul2	tet(D)	-	dfrA5	TEM-1D.v1^	-	SHV-1^	-	-	-	-	KL117	unknown (KL117)	?2	Typeable	99.95%	-	O1/O2v1	O1ab	-	Typeable
702211	2018-07-23	Kenya	Wound	ST37	no	no	SAMN54588733	-	0	-	0	-	0	-	0	-	0	-	-	-	-	aadA2	-	-	-	-	catII.2*	-	sul1;sul2	tet(D)	-	dfrA16.v2	TEM-1D.v1^	-	SHV-11^	35Q	-	-	-	KL136	unknown (KL136)	-	Typeable	99.90%	-	O1/O2v2	O2afg	-	Typeable
702199	2018-05-08	Kenya	Wound	ST45	no	no	SAMN54588731	ybt 10; ICEKp4	80	-	0	-	0	-	0	-	0	-	-	-	CTX-M-15	aac(3)-IIa.v1;strA.v1^;strB.v1	-	-	-	Mrx;mphA	-	-	sul2*	-	-	dfrA14.v2*	TEM-1D.v1^	-	SHV-1	-	-	-	-	KL52	K52	?3!	Typeable	99.93%	-	OL13	O13	?3!	Typeable
702325	2019-02-12	Kenya	Wound	ST485	no	no	SAMN54588743	ybt 10; ICEKp4	78-1LV	-	0	-	0	-	0	-	0	-	-	-	-	strA.v1^;strB.v1	-	-	-	-	-	-	sul2*	tet(D)^	-	-	TEM-1D.v1^	-	SHV-1	-	-	-	-	KL183	unknown (KL183)	?4+	Typeable	98.30%	-	OL13	O13	?4!	Typeable
702279	2019-03-26	Kenya	Wound	ST551	no	no	SAMN54588739	-	0	-	0	-	0	-	0	-	0	-	-	-	CTX-M-15	aac(6')-Ib-cr.v2;aadA16*;aph3-Ia.v1^;strA.v1*;strB.v1*	-	-	qnrB1.v2^	Mrx;mphA	catII.2*	arr-3	sul1;sul2	tet(D)	-	dfrA14.v2*;dfrA27	TEM-1D.v1^	-	SHV-11^	35Q	-	-	-	KL10	K10	-	Typeable	98.63%	-	O1/O2v1	O1ab	-	Typeable
702245	2019-02-06	Kenya	Wound	ST6	no	no	SAMN54588736	ybt 14; ICEKp5	376	-	0	-	0	-	0	-	0	-	-	-	CTX-M-15	strA.v1^;strB.v1	-	-	qnrB1.v2^	-	-	-	sul2	-	-	dfrA14.v2*	TEM-1D.v1^	-	SHV-1	-	-	-	-	KL7	K7	-	Typeable	99.52%	-	O1/O2v1	O1ab	-	Typeable
824980	2018-02-07	Kenya	Urine	ST5596	no	no	SAMN54588995	-	0	-	0	-	0	-	0	-	0	-	-	-	-	aph3-Ia.v1^;strA.v1^;strB.v1	-	-	-	-	-	-	sul1;sul2*	tet(D)	-	dfrA7	-	-	SHV-11^	35Q	-	-	-	KL15	K15	-	Typeable	99.84%	-	O4	O4	-	Typeable
702261	2019-03-26	Kenya	Wound	ST711	no	no	SAMN54588738	ybt 16; ICEKp12	277	-	0	-	0	-	0	-	0	-	-	-	CTX-M-15	aac(6')-Ib-cr.v2;strA.v1^;strB.v1	-	-	-	-	CatB4.v1	-	sul2	tet(A).v1	-	dfrA14.v2*	OXA-1;TEM-1D.v1^	-	SHV-187	-	-	-	-	KL54	K54	-	Typeable	99.94%	-	O1/O2v2	O1ab	-	Typeable
824964	2015-06-02	Kenya	Wound	ST45	no	no	SAMN54588994	-	0	-	0	-	0	-	0	-	0	-	-	-	-	aph3-Ia.v1^;strA.v1^;strB.v1	-	-	-	-	-	-	sul1;sul2*	tet(D)	-	dfrA7	-	-	SHV-1	-	-	-	-	KL24	K24	-	Typeable	99.54%	-	O1/O2v1	O2a	-	Typeable
702309	2018-11-12	Kenya	Wound	ST836	no	no	SAMN54588742	ybt 10; ICEKp4	106	-	0	-	0	-	0	-	0	-	-	-	CTX-M-15	aac(3)-IId^;aph3-Ia.v1^	-	-	-	Mrx;mphA	-	-	sul2	-	-	dfrA14.v2*;dfrA30*	TEM-1D.v1^	-	SHV-77^	35Q	-	-	-	KL30	K30	?2	Typeable	97.05%	-	O1/O2v1	O1ab	-	Typeable
21769	2011-03-15	Peru	Surveillance	ST15	no	no	SAMN54587952	-	0	-	0	-	0	-	0	-	0	-	-	-	-	aac(3)-IV;aadA2;aadA^;aph(4)-Ia;aph3-Ia.v1^	-	-	qnrB19^	Mrx;mphA	cmlA1*	-	sul1;sul2;sul3	tet(A).v1	-	dfrA12	TEM-1D.v1^	-	-	-	-	-	GyrA-83F;GyrA-87A;ParC-80I	KL24	K24	-	Typeable	99.98%	-	O1/O2v1	O1ab	-	Typeable
21770	2011-03-15	Peru	Surveillance	ST15	no	no	SAMN54587953	-	0	-	0	-	0	-	0	-	0	-	-	-	SHV-12	aac(3)-IV;aadA2*;aadA^;aph(4)-Ia	-	-	qnrB19^	Mrx;mphA	cmlA1*	-	sul2;sul3	-	-	-	-	-	-	-	-	-	GyrA-83F;GyrA-87A;ParC-80I	KL24	K24	-	Typeable	99.98%	-	O1/O2v1	O1ab	-	Typeable
21771	2011-03-15	Peru	Surveillance	ST15	no	no	SAMN54587954	-	0	-	0	-	0	-	0	-	0	-	-	-	SHV-55^	aac(3)-IV;aadA^;aph(4)-Ia;aph3-Ia.v1^	-	-	qnrB19^	Mrx;mphA	cmlA1*	-	sul1;sul2;sul3	tet(A).v1	-	dfrA12	TEM-1D.v1^	-	-	238S;240K	-	-	GyrA-83F;GyrA-87A;ParC-80I	KL24	K24	-	Typeable	99.98%	-	O1/O2v1	O1ab	-	Typeable
21772	2011-03-15	Peru	Surveillance	ST15	no	no	SAMN54587955	-	0	-	0	-	0	-	0	-	0	-	-	-	-	aac(3)-IV;aadA2;aadA^;aph(4)-Ia;aph3-Ia.v1^	-	-	qnrB19^	Mrx;mphA	cmlA1*	-	sul1;sul2;sul3	tet(A).v1	-	dfrA12	TEM-1D.v1^	-	-	-	-	-	GyrA-83F;GyrA-87A;ParC-80I	KL24	K24	-	Typeable	99.98%	-	O1/O2v1	O1ab	-	Typeable
21773	2011-03-15	Peru	Surveillance	ST15	no	no	SAMN54587956	-	0	-	0	-	0	-	0	-	0	-	-	-	CTX-M-15	aac(3)-IIa.v1^;aac(6')-Ib-cr.v2;aadA2^;strB.v1	-	-	qnrB1.v2^	-	catA1^	-	sul1;sul2	tet(A).v1	-	dfrA12;dfrA14.v2*	OXA-1;TEM-1D.v1^	-	SHV-28^	-	-	-	GyrA-83F;GyrA-87A;ParC-80I	KL24	K24	?2	Typeable	99.98%	-	O1/O2v1	O1ab	-	Typeable
21775	2011-03-24	Peru	Blood	ST342	no	no	SAMN54587957	-	0	-	0	-	0	-	0	-	0	-	-	-	CTX-M-15	aac(3)-IIa.v1^;aac(6')-Ib-cr.v2;strA.v1^;strB.v1	-	-	qnrB1.v2^	-	-	-	sul2	tet(A).v1	-	dfrA14.v2*	OXA-1;TEM-1D.v1^	-	SHV-60	35Q	-	-	-	KL30	K30	-	Typeable	97.40%	-	O1/O2v2	O1ab	-	Typeable
21776	2011-03-24	Peru	Blood	ST342	no	no	SAMN54587958	-	0	-	0	-	0	-	0	-	0	-	-	-	CTX-M-15	aac(3)-IIa.v1^;aac(6')-Ib-cr.v2;strA.v1^;strB.v1	-	-	qnrB1.v2^	-	-	-	sul2	tet(A).v1	-	dfrA14.v2*	OXA-1;TEM-1D.v1^	-	SHV-60	35Q	-	-	-	KL30	K30	-	Typeable	97.40%	-	O1/O2v2	O1ab	-	Typeable
21777	2011-03-24	Peru	Human	ST11	no	no	SAMN54587959	ybt 10; ICEKp4	97-4LV	-	0	-	0	-	0	-	0	-	-	-	CTX-M-15;CTX-M-2^;SHV-12	aac(6')-Ib-cr.v2;aph(3')-VIa;strA.v1^;strB.v1	-	-	qnrB1.v2^;qnrB19^	-	-	arr-3	sul1;sul2	tet(A).v1;tet(D)	-	dfrA14.v2*	OXA-1	-	-	238S;240K;35Q	OmpK35-64%	-	GyrA-83I;ParC-80I	KL141	unknown (KL141)	?2	Typeable	99.64%	-	O4	O4	-	Typeable
21779	2011-03-24	Peru	Human	ST11	no	no	SAMN54587960	ybt 10; ICEKp4	97-4LV	-	0	-	0	-	0	-	0	-	-	-	CTX-M-2^;SHV-12	aac(3)-IIa.v1;aac(6')-Ib-cr.v2^;aadA2;aph(3')-VIa;rmtG^	-	-	qnrB19^	-	catB3.v2	arr-3	sul1;sul2	tet(D)	-	-	OXA-1	-	-	238S;240K;35Q	OmpK35-64%	-	GyrA-83I;ParC-80I	KL141	unknown (KL141)	?2	Typeable	99.67%	-	O4	O4	-	Typeable
21780	2011-03-24	Peru	Human	ST11	no	no	SAMN54587961	ybt 10; ICEKp4	97-4LV	-	0	-	0	-	0	-	0	-	-	-	CTX-M-2^;SHV-12^	aac(3)-IIa.v1;aac(6')-Ib-cr.v2^;aadA2;aph(3')-VIa	-	-	-	-	catB3.v2	arr-3	sul1;sul2	-	-	-	OXA-1	-	-	238S;240K;35Q	OmpK35-64%	-	GyrA-83I;ParC-80I	KL141	unknown (KL141)	-	Typeable	99.67%	-	O4	O4	-	Typeable
21781	2011-03-24	Peru	Blood	ST70	no	no	SAMN54587962	ybt 8; ICEKp9 (truncated)	195-1LV	-	0	-	0	-	0	-	0	-	-	-	CTX-M-15	aac(3)-IIa.v1^;aac(6')-Ib-cr.v2;strA.v1^;strB.v1	-	-	-	-	-	-	sul2	-	-	-	OXA-1;TEM-1D.v1^	-	SHV-32	156D	-	-	GyrA-87N	KL136	unknown (KL136)	-	Typeable	99.88%	-	O1/O2v2	O1ab	-	Typeable
21782	2011-03-24	Peru	Blood	ST70	no	no	SAMN54587963	ybt 8; ICEKp9	195	-	0	-	0	-	0	-	0	-	-	-	CTX-M-15	aac(3)-IIa.v1^;aac(6')-Ib-cr.v2;strA.v1^;strB.v1	-	-	-	-	-	-	sul2	-	-	-	OXA-1;TEM-1D.v1^	-	SHV-32	156D	-	-	GyrA-87N	KL136	unknown (KL136)	-	Typeable	99.88%	-	O1/O2v2	O1ab	-	Typeable
21783	2011-03-24	Peru	Blood	ST70	no	no	SAMN54587964	ybt 8; ICEKp9	195	-	0	-	0	-	0	-	0	-	-	-	CTX-M-15	aac(3)-IIa.v1^;aac(6')-Ib-cr.v2;strA.v1^;strB.v1	-	-	-	-	-	-	sul2	-	-	-	OXA-1	-	SHV-32	156D	-	-	GyrA-87N	KL136	unknown (KL136)	-	Typeable	99.88%	-	O1/O2v2	O1ab	-	Typeable
21784	2011-04-15	Peru	Blood	ST151	no	no	SAMN54587965	ybt 10; ICEKp4	350	-	0	-	0	-	0	-	0	-	-	-	CTX-M-15	aac(3)-IIa.v1^;aac(6')-Ib-cr.v2;strA.v1^;strB.v1	-	-	qnrB1.v2^	-	-	-	sul2	tet(A).v1	-	dfrA14.v2*	OXA-1;TEM-1D.v1^	-	SHV-1^	-	-	-	-	KL30	K30	-	Typeable	99.75%	-	O1/O2v2	O1ab	-	Typeable
21786	2011-03-29	Peru	Blood	ST1373	no	no	SAMN54587966	ybt 8; ICEKp9	195	-	0	-	0	-	0	-	0	-	-	-	CTX-M-15;CTX-M-8	aac(3)-IIa.v1^;aadA*;strA.v1^;strB.v1	-	-	qnrB1.v2^;qnrE1	-	-	-	sul2	tet(A).v1	-	dfrA14.v2*	OXA-1;OXA-9.v1	-	SHV-11^	35Q	-	-	-	KL38	K38	-	Typeable	99.93%	-	O3b	O3b	-	Typeable
21787	2011-04-07	Peru	Blood	ST151	no	no	SAMN54587967	ybt 10; ICEKp4	350	-	0	-	0	-	0	-	0	-	-	-	CTX-M-15	aac(3)-IIa.v1^;aac(6')-Ib-cr.v2;strA.v1^;strB.v1	-	-	qnrB1.v2^	-	-	-	sul2	tet(A).v1	-	dfrA14.v2*	OXA-1;TEM-1D.v1^	-	SHV-1^	-	-	-	-	KL30	K30	-	Typeable	99.75%	-	O1/O2v2	O1ab	-	Typeable
21789	2011-04-07	Peru	Blood	ST151	no	no	SAMN54587968	ybt 10; ICEKp4	350	-	0	-	0	-	0	-	0	-	-	-	CTX-M-15	aac(3)-IIa.v1^;aac(6')-Ib-cr.v2;strA.v1^;strB.v1	-	-	qnrB1.v2^	-	-	-	sul2	tet(A).v1	-	dfrA14.v2*	OXA-1;TEM-1D.v1^	-	SHV-1^	-	-	-	-	KL30	K30	-	Typeable	99.75%	-	O1/O2v2	O1ab	-	Typeable
21790	2011-03-21	Peru	Urine	ST340	no	no	SAMN54587969	ybt 13; ICEKp2	299-1LV	-	0	-	0	-	0	-	0	-	-	-	-	aadA2	-	-	-	-	-	-	sul1	-	-	-	-	-	SHV-11	35Q	OmpK35-0%	-	GyrA-83I;ParC-80I	KL15	K15	-	Typeable	99.98%	-	O4	O4	-	Typeable
21793	2011-10-18	Peru	Respiratory	ST70	no	no	SAMN54587970	ybt 8; ICEKp9	195	-	0	-	0	-	0	-	0	-	-	-	-	aac(3)-IIa.v1^;aac(6')-Ib-cr.v2	-	-	qnrB1.v2^	-	-	-	-	-	-	-	OXA-1	-	SHV-32	156D	-	-	-	KL136	unknown (KL136)	-	Typeable	99.88%	-	O1/O2v2	O1ab	-	Typeable
21794	2011-10-22	Peru	Respiratory	ST70	no	no	SAMN54587971	ybt 8; ICEKp9	195	-	0	-	0	-	0	-	0	-	-	-	CTX-M-15	aac(3)-IIa.v1^;aac(6')-Ib-cr.v2;strA.v1^	-	-	qnrB1.v2^	-	-	-	sul2	-	-	dfrA14.v2*	OXA-1;TEM-1D.v1^	-	SHV-32	156D	-	-	-	KL136	unknown (KL136)	-	Typeable	99.88%	-	O1/O2v2	O1ab	-	Typeable
21795	2011-11-30	Peru	Respiratory	ST37	no	no	SAMN54587972	ybt 16; ICEKp12	277-3LV	-	0	-	0	-	0	-	0	-	-	-	-	-	-	-	-	-	catII.2*	-	sul2	-	-	dfrA18*	-	-	SHV-1^	-	-	-	-	KL12	K12	?3	Typeable	99.97%	-	OL103	unknown (OL103)	?2	Typeable
21797	2011-12-06	Peru	Urine	ST37	no	no	SAMN54587973	ybt 16; ICEKp12	277-3LV	-	0	-	0	-	0	-	0	-	-	-	-	-	-	-	-	-	catII.2*	-	sul2	-	-	dfrA18*	-	-	SHV-11^	35Q	-	-	-	KL12	K12	?3	Typeable	99.95%	-	OL103	unknown (OL103)	?2	Typeable
21798	2011-12-06	Peru	Wound	ST15	no	no	SAMN54587974	ybt 10; ICEKp4	28-1LV	-	0	-	0	-	0	-	0	-	-	-	CTX-M-15;SHV-5	aac(6')-Ib-cr.v2;aadA2^;aph3-Ia.v1^	-	-	-	Mrx;mphA	-	-	sul1	tet(A).v1	-	dfrA12	OXA-1;TEM-1D.v1^	-	-	238S;240K	-	-	GyrA-83F;GyrA-87A;ParC-80I	KL24	K24	-	Typeable	99.98%	-	O1/O2v1	O1ab	-	Typeable
21799	2011-12-26	Peru	Subgaleal secretion	ST37	no	no	SAMN54587975	ybt 14; ICEKp5	354	-	0	-	0	-	0	-	0	-	-	-	CTX-M-3	-	-	fosA3	-	-	-	-	sul2	-	-	-	-	-	SHV-11^	35Q	-	-	-	KL136	unknown (KL136)	-	Typeable	99.88%	-	O1/O2v2	O2afg	-	Typeable
21802	2012-01-12	Peru	Wound	ST70	no	no	SAMN54587976	ybt 8; ICEKp9	195	-	0	-	0	-	0	-	0	-	-	-	CTX-M-15	aac(3)-IIa.v1^;aac(6')-Ib-cr.v2;strA.v1^;strB.v1	-	-	qnrB1.v2^	-	-	-	sul2	tet(A).v1	-	dfrA14.v2*	OXA-1;TEM-1D.v1^	-	SHV-32	156D	-	-	-	KL136	unknown (KL136)	-	Typeable	99.88%	-	O1/O2v2	O1ab	-	Typeable
21803	2012-02-08	Peru	Wound	ST37	no	no	SAMN54587977	ybt 14; ICEKp5	354	-	0	-	0	-	0	-	0	-	-	-	CTX-M-3	-	-	fosA3	-	-	-	-	sul2	-	-	-	-	-	SHV-11^	35Q	-	-	-	KL136	unknown (KL136)	-	Typeable	99.88%	-	O1/O2v2	O2afg	-	Typeable
21804	2012-01-01	Peru	Respiratory	ST70	no	no	SAMN54587978	ybt 8; ICEKp9	195	-	0	-	0	-	0	-	0	-	-	-	CTX-M-15	aac(3)-IIa.v1^;aac(6')-Ib-cr.v2;strA.v1^;strB.v1	-	-	qnrB1.v2^	-	-	-	sul2	-	-	dfrA14.v2*	OXA-1;TEM-1D.v1^	-	SHV-32	156D	OmpK35-85%	-	-	KL136	unknown (KL136)	-	Typeable	99.88%	-	O1/O2v2	O1ab	-	Typeable
21805	2012-03-01	Peru	Wound	ST45	no	no	SAMN54587979	ybt 10; ICEKp4	78	-	0	-	0	-	0	-	0	-	-	-	-	-	-	-	-	-	-	-	-	-	-	-	-	-	SHV-1	-	-	-	-	KL24	K24	-	Typeable	99.56%	-	O1/O2v1	O2a	-	Typeable
21806	2012-03-12	Peru	Respiratory	ST45	no	no	SAMN54587980	ybt 10; ICEKp4	78	-	0	-	0	-	0	-	0	-	-	-	CTX-M-2;SHV-5	aac(6')-Ib-cr.v2	-	-	qnrVC1	Mrx;mphA	catA1^;catB3.v2	arr-3	sul1;sul2	tet(D)	-	-	OXA-1	-	-	238S;240K	-	-	-	KL24	K24	-	Typeable	99.56%	-	O1/O2v1	O2a	-	Typeable
21807	2012-03-23	Peru	Wound	ST348	no	no	SAMN54587981	-	0	-	0	-	0	-	0	-	0	-	-	-	CTX-M-15	aac(3)-IIa.v1^;aac(6')-Ib-cr.v2;strA.v1^;strB.v1	-	-	qnrB1.v2^	-	-	-	sul2	tet(A).v1	-	dfrA14.v2*	OXA-1;TEM-1D.v1^	-	SHV-11^	35Q	-	-	-	KL62	K62	-	Typeable	99.94%	-	O1/O2v1	O1ab	-	Typeable
21810	2012-05-01	Peru	Respiratory	ST70	no	no	SAMN54587982	ybt 8; ICEKp9	195	-	0	-	0	-	0	-	0	-	-	-	CTX-M-15	aac(6')-Ib-cr.v2;aac(6')-Il;aadA1.v1;strA.v1^;strB.v1	-	-	qnrB1.v2^;qnrB19^	-	catA1*	-	sul2	-	-	dfrA14.v2*	OXA-1;TEM-1D.v1^	-	-	-	OmpK35-85%	-	-	KL136	unknown (KL136)	-	Typeable	99.88%	-	O1/O2v2	O1ab	-	Typeable
21811	2012-05-01	Peru	Umbilical secretion	ST15	no	no	SAMN54587983	-	0	-	0	-	0	-	0	-	0	-	-	-	CTX-M-15	aac(3)-IIa.v1^;aac(6')-Ib-cr.v2;strA.v1^;strB.v1	-	-	-	-	-	-	sul2	tet(A).v1	-	dfrA14.v2*	OXA-1;TEM-1D.v1^	-	SHV-28^	-	-	-	GyrA-83F;GyrA-87A;ParC-80I	KL48	K48	-	Typeable	97.71%	-	O1/O2v1	O1ab	-	Typeable
21812	2012-04-30	Peru	Respiratory	ST15	no	no	SAMN54587984	ybt 10; ICEKp4	28	-	0	-	0	-	0	-	0	-	-	-	CTX-M-15	aac(6')-Ib-cr.v2;aadA2^;aph3-Ia.v1^	-	-	-	Mrx;mphA	-	-	sul1	tet(A).v1	-	dfrA12	OXA-1;TEM-1D.v1^	-	SHV-28^	-	-	-	GyrA-83F;GyrA-87A;ParC-80I	KL24	K24	-	Typeable	100.00%	-	O1/O2v1	O1ab	-	Typeable
21813	2012-05-06	Peru	Device	ST14	no	no	SAMN54587985	ybt 13; ICEKp2	299	-	0	-	0	-	0	-	0	-	-	-	-	-	-	-	-	-	-	-	-	tet(D)	-	-	-	-	SHV-28^	-	-	-	-	KL2	K2	-	Typeable	99.83%	-	O1/O2v1	O1ab	-	Typeable
21815	2012-05-03	Peru	Urine	ST15	no	no	SAMN54587986	ybt 10; ICEKp4	28	-	0	-	0	-	0	-	0	-	-	-	CTX-M-15	aac(6')-Ib-cr.v2;aadA2^;aph3-Ia.v1^	-	-	-	Mrx;mphA	-	-	sul1	tet(A).v1	-	dfrA12	OXA-1;TEM-1D.v1^	-	SHV-28^	-	-	-	GyrA-83F;GyrA-87A;ParC-80I	KL24	K24	-	Typeable	100.00%	-	O1/O2v1	O1ab	-	Typeable
21816	2012-06-27	Peru	Urine	ST895	no	no	SAMN54587987	-	0	-	0	-	0	-	0	-	0	-	-	-	CTX-M-27	aac(3)-IV;aac(6')-Ib-cr.v2;aadA16*;aadA^;aph(3')-Ia*;aph(4)-Ia	-	-	qnrB2.v2^	Mrx;mphA	floR.v1*	arr-3	sul1;sul3	tet(D)	-	dfrA27	-	-	SHV-11	35Q	-	-	GyrA-83I;ParC-80I	KL155	unknown (KL155)	?4+	Typeable	99.29%	-	OL13	O13	?2!	Typeable
21819	2012-09-30	Peru	Unknown	ST273	no	no	SAMN54587988	-	0	-	0	-	0	-	0	-	0	-	-	-	CTX-M-15	aac(3)-IIa.v1^;aac(6')-Ib-cr.v2;strA.v1^;strB.v1	-	-	qnrB1.v2^	-	-	-	sul2	tet(A).v1	-	dfrA14.v2*	OXA-1;TEM-1D.v1^	-	SHV-11^	35Q	-	-	GyrA-83I;ParC-80I	KL74	K74	?3	Typeable	99.41%	-	OL104	unknown (OL104)	?2	Typeable
21820	2012-09-30	Peru	Unknown	ST273	no	no	SAMN54587989	-	0	-	0	-	0	-	0	-	0	-	-	-	CTX-M-15	aac(3)-IIa.v1^;aac(6')-Ib-cr.v2;strA.v1^;strB.v1	-	-	qnrB1.v2^	-	-	-	sul2	tet(A).v1	-	dfrA14.v2*	OXA-1;TEM-1D.v1^	-	SHV-11^	35Q	-	-	GyrA-83I;ParC-80I	KL74	K74	?3	Typeable	99.42%	-	OL104	unknown (OL104)	?2	Typeable
21822	2013-02-19	Peru	Respiratory	ST307	no	no	SAMN54587990	-	0	-	0	-	0	-	0	-	0	-	-	-	CTX-M-15	aac(3)-IIa.v1^;aac(6')-Ib-cr.v2;strA.v1^;strB.v1	-	-	qnrB1.v2^	-	-	-	sul2	tet(A).v1	-	dfrA14.v2*	OXA-1;TEM-1D.v1^	-	SHV-28^	-	-	-	GyrA-83I;ParC-80I	KL102	unknown (KL102)	-	Typeable	99.66%	-	O1/O2v2	O2afg	-	Typeable
21823	2013-03-01	Peru	Respiratory	ST15	no	no	SAMN54587991	-	0	-	0	-	0	-	0	-	0	-	-	-	CTX-M-15	aac(3)-IIa.v1^;aac(6')-Ib-cr.v2;strA.v1^;strB.v1	-	-	qnrB1.v2^	-	-	-	sul2	tet(A).v1	-	dfrA14.v2*	OXA-1;TEM-1D.v1^	-	SHV-28^	-	-	-	GyrA-83F;GyrA-87A;ParC-80I	KL48	K48	-	Typeable	97.71%	-	O1/O2v1	O1ab	-	Typeable
21824	2013-03-19	Peru	Respiratory	ST15	no	no	SAMN54587992	-	0	-	0	-	0	-	0	-	0	-	-	-	CTX-M-15	aac(6')-Ib-cr.v2;aac(6')-Il;aadA1.v1;strA.v1^;strB.v1	-	-	qnrB1.v2^;qnrB19^	-	catA1*	-	sul2	tet(A).v1	-	dfrA14.v2*	OXA-1;TEM-1D.v1^	-	SHV-28^	-	-	-	GyrA-83F;GyrA-87A;ParC-80I	KL48	K48	-	Typeable	97.71%	-	O1/O2v1	O1ab	-	Typeable
21825	2013-03-06	Peru	Respiratory	ST307	no	no	SAMN54587993	-	0	-	0	-	0	-	0	-	0	-	-	-	CTX-M-15	aac(3)-IIa.v1^;aac(6')-Ib-cr.v2;strA.v1^;strB.v1	-	-	qnrB1.v2^	-	-	-	sul2	tet(A).v1	-	dfrA14.v2*	OXA-1;TEM-1D.v1^	-	SHV-28^	-	-	-	GyrA-83I;ParC-80I	KL102	unknown (KL102)	-	Typeable	99.66%	-	O1/O2v2	O2afg	-	Typeable
21826	2013-04-24	Peru	Respiratory	ST322	no	no	SAMN54587994	-	0	-	0	-	0	-	0	-	0	-	-	-	-	-	-	-	-	-	-	-	-	-	-	-	-	-	SHV-11^	35Q	-	-	-	KL17	K17	-	Typeable	99.51%	-	O4	O4	-	Typeable
21827	2013-05-04	Peru	Device	ST15	no	no	SAMN54587995	-	0	-	0	-	0	-	0	-	0	-	-	-	CTX-M-15	aac(6')-Ib-cr.v2;aadA2^;aph3-Ia.v1^	-	-	-	Mrx;mphA	-	-	sul1	tet(A).v1	-	dfrA12	OXA-1;TEM-1D.v1^	-	SHV-28^	-	-	-	GyrA-83F;GyrA-87A;ParC-80I	KL64	K64	-	Typeable	99.79%	-	O1/O2v1	O1ab	-	Typeable
21828	2013-05-03	Peru	Blood	ST15	no	no	SAMN54587996	-	0	-	0	-	0	-	0	-	0	-	-	-	CTX-M-15	aac(6')-Ib-cr.v2;aadA2^;aph3-Ia.v1^	-	-	-	Mrx;mphA	-	-	sul1	tet(A).v1	-	dfrA12	OXA-1;TEM-1D.v1^	-	SHV-28^	-	-	-	GyrA-83F;GyrA-87A;ParC-80I	KL64	K64	-	Typeable	99.79%	-	O1/O2v1	O1ab	-	Typeable
21829	2013-05-20	Peru	Respiratory	ST15	no	no	SAMN54587997	ybt 10; ICEKp4	28	-	0	-	0	-	0	-	0	-	-	-	CTX-M-15	aac(6')-Ib-cr.v2;aadA2^;aph3-Ia.v1^	-	-	-	Mrx;mphA	-	-	sul1	tet(A).v1	-	dfrA12	OXA-1;TEM-1D.v1^	-	SHV-28^	-	-	-	GyrA-83F;GyrA-87A;ParC-80I	KL24	K24	-	Typeable	99.75%	-	O1/O2v1	O1ab	-	Typeable
21830	2013-05-20	Peru	Respiratory	ST15	no	no	SAMN54587998	ybt 10; ICEKp4	28	-	0	-	0	-	0	-	0	-	-	-	CTX-M-15	aac(6')-Ib-cr.v2;aadA2^;aph3-Ia.v1^	-	-	-	Mrx;mphA	-	-	sul1	tet(A).v1	-	dfrA12	OXA-1;TEM-1D.v1^	-	SHV-28^	-	-	-	GyrA-83F;GyrA-87A;ParC-80I	KL24	K24	-	Typeable	100.00%	-	O1/O2v1	O1ab	-	Typeable
21831	2013-05-29	Peru	Respiratory	ST380	yes	yes	SAMN54587999	ybt 16; ICEKp12 (truncated)	279-1LV	-	0	iuc 2	14	iro 3 (truncated)	12	rmp 2; KpVP-2	7	-	peg-344	-	-	-	-	-	-	-	-	-	-	-	-	-	-	-	SHV-207	-	-	-	-	KL2	K2	-	Typeable	99.80%	-	O1/O2v1	O1ab	!	Typeable
21833	2013-08-02	Peru	Device	ST348	no	no	SAMN54588000	ybt 10; ICEKp4	350	-	0	-	0	-	0	-	0	-	-	-	CTX-M-15	aac(6')-Ib-cr.v2;strA.v1^;strB.v1	-	-	qnrB1.v2^	-	-	-	sul2	tet(A).v1	-	dfrA14.v2*	OXA-1;TEM-1D.v1^	-	SHV-11^	35Q	-	-	-	KL62	K62	-	Typeable	99.94%	-	O1/O2v1	O1ab	-	Typeable
21834	2013-08-07	Peru	Blood	ST348	no	no	SAMN54588001	ybt 10; ICEKp4	350	-	0	-	0	-	0	-	0	-	-	-	CTX-M-15	aac(6')-Ib-cr.v2;strA.v1^;strB.v1	-	-	qnrB1.v2^	-	-	-	sul2	tet(A).v1	-	dfrA14.v2*	OXA-1;TEM-1D.v1^	-	SHV-11^	35Q	-	-	-	KL62	K62	-	Typeable	99.94%	-	O1/O2v1	O1ab	-	Typeable
21835	2013-09-24	Peru	Surveillance	ST661	no	no	SAMN54588002	-	0	-	0	-	0	-	0	-	0	-	-	-	CTX-M-15	aac(3)-IIa.v1^;aac(6')-Ib-cr.v2;strA.v1^;strB.v1	-	-	qnrB1.v2^	-	-	-	sul2	tet(A).v1	-	dfrA14.v2*	OXA-1	-	SHV-27	156D	-	-	-	KL109	unknown (KL109)	-	Typeable	99.77%	-	O1/O2v2	O2afg	-	Typeable
21836	2013-09-24	Peru	Colostomy secretion	ST15	no	no	SAMN54588003	ybt 9; ICEKp3	174	-	0	-	0	-	0	-	0	-	-	-	CTX-M-15	aac(3)-IIa.v1^;aac(6')-Ib-cr.v2;strA.v1^;strB.v1	-	-	-	-	-	-	sul2	-	-	dfrA14.v2*	OXA-1;TEM-1D.v1^	-	SHV-28^	-	-	-	GyrA-83F;GyrA-87A;ParC-80I	KL112	unknown (KL112)	-	Typeable	99.53%	-	O1/O2v1	O1ab	-	Typeable
21837	2013-09-24	Peru	Colostomy secretion	ST661	no	no	SAMN54588004	-	0	-	0	-	0	-	0	-	0	-	-	-	CTX-M-15	aac(3)-IIa.v1^;aac(6')-Ib-cr.v2;strA.v1^;strB.v1	-	-	qnrB1.v2^	-	-	-	sul2	tet(A).v1	-	dfrA14.v2*	OXA-1	-	SHV-27	156D	-	-	-	KL109	unknown (KL109)	-	Typeable	99.77%	-	O1/O2v2	O2afg	-	Typeable
21838	2013-08-24	Peru	Fluid	ST1401	no	no	SAMN54588005	-	0	-	0	-	0	-	0	-	0	-	-	-	SHV-5	-	-	-	-	-	-	-	-	-	-	-	-	-	-	238S;240K	-	-	-	KL146	unknown (KL146)	?2	Typeable	97.21%	-	O1/O2v2	O2afg	-	Typeable
21839	2013-08-04	Peru	Respiratory	ST299	no	no	SAMN54588006	-	0	-	0	-	0	-	0	-	0	-	-	-	-	-	-	-	-	-	-	-	-	-	-	-	-	-	SHV-1	-	-	-	-	KL7	K7	?2	Typeable	99.51%	-	O1/O2v1	O1ab	-	Typeable
21840	2013-08-22	Peru	Wound	ST348	no	no	SAMN54588007	ybt 10; ICEKp4	350	-	0	-	0	-	0	-	0	-	-	-	CTX-M-15	aac(6')-Ib-cr.v2;strA.v1^;strB.v1	-	-	qnrB1.v2^	-	-	-	sul2	tet(A).v1	-	dfrA14.v2*	OXA-1;TEM-1D.v1^	-	SHV-11^	35Q	-	-	-	KL62	K62	-	Typeable	99.94%	-	O1/O2v1	O1ab	-	Typeable
21841	2013-10-17	Peru	Respiratory	ST893	yes	yes	SAMN54588008	ybt 19; ICEKp16	566	-	0	iuc 1	1	iro 1	1	rmp 1; KpVP-1	26	rmpA2_8*	peg-344	-	-	-	-	-	-	-	-	-	-	-	-	-	-	-	SHV-1	-	-	-	-	KL20	K20	?3	Typeable	99.49%	-	O3/O3a	O3/O3a	?2	Typeable
21842	2013-09-14	Peru	Secretion	ST13	no	no	SAMN54588009	-	0	-	0	-	0	-	0	-	0	-	-	-	CTX-M-15	aac(3)-IIa.v1^;aac(6')-Ib-cr.v2;strA.v1^;strB.v1	-	-	qnrB1.v2^	-	-	-	sul2	tet(A).v1	-	dfrA14.v2*	OXA-1	-	SHV-1^	-	-	-	-	KL3	K3	!	Typeable	99.97%	-	O1/O2v2	O1ab	-	Typeable
21843	2013-09-14	Peru	Blood	ST498	no	no	SAMN54588010	-	0	clb 3	17-1LV	-	0	-	0	-	0	-	-	-	-	aac(3)-IIa.v1;aac(6')-Ian;aadA1.v1^;strA.v1;strB.v1*	-	-	-	-	-	-	sul1	-	-	dfrA1.v2	SCO-1;TEM-1D.v1^	-	SHV-11^	35Q	-	-	-	KL62	K62	-	Typeable	99.93%	-	O1/O2v1	O1ab	-	Typeable
21844	2013-09-16	Peru	Blood	ST432	no	no	SAMN54588011	-	0	-	0	-	0	-	0	-	0	-	-	-	CTX-M-15	aac(6')-Ib-cr.v2;aac(6')-Il;aadA1.v1;strA.v1^;strB.v1	-	-	qnrB1.v2^;qnrB19^	-	catA1*	-	sul2	tet(A).v1	-	dfrA14.v2*	OXA-1;TEM-1D.v1^	-	SHV-60^	35Q	OmpK35-16%	-	-	KL57	K57	?3	Typeable	99.92%	-	O3b	O3b	?2	Typeable
21845	2013-09-16	Peru	Blood	ST432	no	no	SAMN54588012	-	0	-	0	-	0	-	0	-	0	-	-	-	CTX-M-15	aac(6')-Ib-cr.v2;aac(6')-Il;aadA1.v1;strA.v1^;strB.v1	-	-	qnrB1.v2^;qnrB19^	-	catA1*	-	sul2	tet(A).v1	-	dfrA14.v2*	OXA-1;TEM-1D.v1^	-	SHV-60^	35Q	OmpK35-16%	-	-	KL57	K57	?3	Typeable	99.92%	-	O3b	O3b	?2	Typeable
21846	2013-12-11	Peru	Urine	ST15	no	no	SAMN54588013	ybt 9; ICEKp3	174	-	0	-	0	-	0	-	0	-	-	-	CTX-M-15	aac(3)-IIa.v1^;aac(6')-Ib-cr.v2;strA.v1^;strB.v1	-	-	-	-	-	-	sul2	-	-	dfrA14.v2*	OXA-1;TEM-1D.v1^	-	SHV-28^	-	-	-	GyrA-83F;GyrA-87A;ParC-80I	KL112	unknown (KL112)	?2	Typeable	99.55%	-	O1/O2v1	O1ab	-	Typeable
21847	2013-12-11	Peru	Urine	ST15	no	no	SAMN54588014	ybt 9; ICEKp3	174	-	0	-	0	-	0	-	0	-	-	-	CTX-M-15	aac(3)-IIa.v1^;aac(6')-Ib-cr.v2;strA.v1^;strB.v1	-	-	-	-	-	-	sul2	-	-	dfrA14.v2*	OXA-1;TEM-1D.v1^	-	SHV-28^	-	-	-	GyrA-83F;GyrA-87A;ParC-80I	KL112	unknown (KL112)	-	Typeable	99.53%	-	O1/O2v1	O1ab	-	Typeable
21918	2012-04-30	Peru	Blood	ST15	no	no	SAMN54588015	ybt 10; ICEKp4	28	-	0	-	0	-	0	-	0	-	-	-	-	-	-	-	-	-	-	-	-	-	-	-	-	-	SHV-28^	-	-	-	GyrA-83F;GyrA-87A;ParC-80I	KL24	K24	-	Typeable	100.00%	-	O1/O2v1	O1ab	-	Typeable
22119	2012-02-17	Peru	Pharyngeal secretion	ST1161	no	no	SAMN54588016	-	0	-	0	-	0	-	0	-	0	-	-	-	CTX-M-15	aac(3)-IIa.v1;aac(3)-IV;aac(6')-Ian;aadA2^;aadA^;aph(4)-Ia;aph3-Ia.v1^	-	-	qnrB19^	Mrx;mphA	cmlA1*;floR.v2*	-	sul1;sul2;sul3	tet(A).v1	-	dfrA12	SCO-1*;TEM-1D.v1^	-	-	-	OmpK35-40%	-	GyrA-83L;GyrA-87Y;ParC-80I	KL19	K19	?2	Typeable	98.02%	-	O1/O2v2	O1ab	-	Typeable
22121	2012-07-17	Peru	Respiratory	ST13	no	no	SAMN54588017	-	0	-	0	-	0	-	0	-	0	-	-	-	CTX-M-15	aac(3)-IIa.v1^;aac(6')-Ib-cr.v2;strA.v1^;strB.v1	-	-	qnrB1.v2^;qnrB19^	-	-	-	sul2	tet(A).v1	-	dfrA14.v2*	OXA-1;TEM-1D.v1^	-	SHV-1^	-	-	-	-	KL124	unknown (KL124)	-	Typeable	99.73%	-	O1/O2v1	O1ab	-	Typeable
22131	2012-09-17	Peru	Colon	ST15	no	no	SAMN54588018	-	0	-	0	-	0	-	0	-	0	-	-	-	CTX-M-15	aac(3)-IIa.v1^;aac(6')-Ib-cr.v2;strA.v1^;strB.v1	-	-	qnrB1.v2^	-	-	-	sul2	tet(A).v1	-	dfrA14.v2*	OXA-1;TEM-1D.v1^	-	SHV-28^	-	-	-	GyrA-83F;GyrA-87A;ParC-80I	KL48	K48	-	Typeable	97.71%	-	O1/O2v1	O1ab	-	Typeable
22228	2012-09-29	Peru	Respiratory	ST45	no	no	SAMN54588019	ybt 10; ICEKp4	78-1LV	-	0	-	0	-	0	-	0	-	-	-	CTX-M-15	aac(3)-IIa.v1*;aac(6')-Ib-cr.v2;strA.v1^;strB.v1	-	-	qnrB1.v2^	-	-	-	sul2	tet(A).v1	-	dfrA14.v2*	OXA-1;TEM-1D.v1^	-	SHV-1	-	-	-	-	KL62	K62	-	Typeable	99.97%	-	O1/O2v1	O2a	-	Typeable
22229	2012-10-11	Peru	Blood	ST15	no	no	SAMN54588020	-	0	-	0	-	0	-	0	-	0	-	-	-	CTX-M-15	aac(3)-IIa.v1^;aac(6')-Ib-cr.v2;strA.v1^;strB.v1	-	-	qnrB1.v2^	-	-	-	sul2	tet(A).v1	-	dfrA14.v2*	OXA-1	-	SHV-28^	-	-	-	GyrA-83F;GyrA-87A;ParC-80I	KL48	K48	-	Typeable	97.68%	-	O1/O2v1	O1ab	-	Typeable
22230	2013-05-14	Peru	Respiratory	ST198	no	no	SAMN54588021	ybt 16; ICEKp12	424-2LV	-	0	-	0	-	0	-	0	-	-	-	CTX-M-15	aac(3)-IIa.v1^;aac(6')-Ib-cr.v2;strA.v1^;strB.v1	-	-	qnrB1.v2^	-	catA1^	-	sul2	tet(A).v1	-	dfrA14.v2*	OXA-1	-	SHV-77^	35Q	OmpK35-64%	-	-	KL30	K30	!	Typeable	97.44%	-	O1/O2v1	O1ab	-	Typeable
22231	2013-05-20	Peru	Blood	ST25	no	no	SAMN54588022	ybt 14; ICEKp5	355-2LV	-	0	-	0	-	0	-	0	-	-	-	CTX-M-15	aac(3)-IIa.v1^;aac(6')-Ib-cr.v2;strA.v1^;strB.v1	-	-	qnrB1.v2^	-	-	-	sul2	tet(A).v1	-	dfrA14.v2*	OXA-1	-	SHV-1^	-	-	-	-	KL2	K2	-	Typeable	99.52%	-	O1/O2v2	O1ab	-	Typeable
22232	2013-06-18	Peru	Respiratory	ST405	no	no	SAMN54588023	ybt 13; ICEKp2	500	-	0	-	0	-	0	-	0	-	-	-	CTX-M-15	aac(3)-IIa.v1^;aac(6')-Ib-cr.v2;strA.v1^;strB.v1	-	-	qnrB1.v2^	-	CatB4.v1	-	sul2	tet(A).v1	-	dfrA14.v2*	OXA-1;TEM-1D.v1^	-	SHV-76^	35Q	-	-	-	KL151	unknown (KL151)	-	Typeable	99.70%	-	O4	O4	-	Typeable
22234	2013-07-17	Peru	Respiratory	ST39	no	no	SAMN54588024	-	0	-	0	-	0	-	0	-	0	-	-	-	CTX-M-14	aac(3)-IId^;strA.v1^;strB.v1	-	-	qnrS1	-	-	-	sul1;sul2	tet(A).v1;tet(D)	-	dfrA1.v1	LAP-2	-	SHV-11^	35Q	-	-	-	KL23	K23	-	Typeable	99.94%	-	O1/O2v2	O1ab	-	Typeable
22235	2013-09-10	Peru	Pharyngeal secretion	ST110	no	no	SAMN54588025	-	0	-	0	-	0	-	0	-	0	-	-	-	-	aadA2;strA.v1;strB.v1	-	-	-	-	catII.2*;cmlA4*	-	sul1;sul2	-	-	dfrA15.v2*	-	-	SHV-1	-	-	-	-	KL108	unknown (KL108)	-	Typeable	99.24%	-	O1/O2v2	O1ab	-	Typeable
22236	2013-09-23	Peru	Abdominal secretion	ST15	no	no	SAMN54588026	-	0	-	0	-	0	-	0	-	0	-	-	-	-	aac(3)-IV;aadA2^;aadA^;aph(4)-Ia;aph3-Ia.v1^	-	-	qnrB19^	Mrx;mphA	cmlA1*	arr-3	sul1;sul3	tet(D)	-	dfrA12;dfrA27	-	-	SHV-106*	35Q	OmpK35-0%	-	GyrA-83F;GyrA-87A;ParC-80I	KL110	unknown (KL110)	-	Typeable	99.69%	-	O1/O2v1	O1ab	-	Typeable
22237	2013-10-11	Peru	Urine	ST629	no	no	SAMN54588027	-	0	-	0	-	0	-	0	-	0	-	-	-	CTX-M-15	aac(3)-IIa.v1^;aac(6')-Ib-cr.v2;rmtG^	-	-	-	-	-	-	sul2	tet(A).v1	-	dfrA14.v2*	OXA-1	-	SHV-11^	35Q	-	-	GyrA-83I;ParC-80I	KL10	Capsule null	?3!	Typeable	99.13%	-	O3/O3a	O3/O3a	?4	Typeable
22238	2013-10-30	Peru	Wound	ST13	no	no	SAMN54588028	-	0	-	0	-	0	-	0	-	0	-	-	-	CTX-M-15	aac(3)-IIa.v1^;aac(6')-Ib-cr.v2;strA.v1^;strB.v1	-	-	qnrB1.v2^	-	-	-	sul2	tet(A).v1	-	dfrA14.v2*	OXA-1	-	SHV-1^	-	-	-	-	KL3	K3	!	Typeable	99.97%	-	O1/O2v2	O1ab	-	Typeable
22239	2013-10-31	Peru	Pharyngeal secretion	ST15	no	no	SAMN54588029	ybt 9; ICEKp3	174	-	0	-	0	-	0	-	0	-	-	-	CTX-M-15	aac(3)-IIa.v1^;aac(6')-Ib-cr.v2;strA.v1^;strB.v1	-	-	-	-	-	-	sul2	-	-	dfrA14.v2*	OXA-1;TEM-1D.v1^	-	SHV-28^	-	-	-	GyrA-83F;GyrA-87A;ParC-80I	KL112	unknown (KL112)	-	Typeable	99.53%	-	O1/O2v1	O1ab	-	Typeable
22240	2013-11-13	Peru	Blood	ST15	no	no	SAMN54588030	ybt 9; ICEKp3	174	-	0	-	0	-	0	-	0	-	-	-	CTX-M-15	strA.v1^;strB.v1	-	-	-	-	-	-	sul2	-	-	-	TEM-1D.v1^	-	SHV-28^	-	-	-	GyrA-83F;GyrA-87A;ParC-80I	KL112	unknown (KL112)	-	Typeable	99.53%	-	O1/O2v1	O1ab	-	Typeable
22241	2013-11-15	Peru	Endotracheal tube secretion	ST15	no	no	SAMN54588031	-	0	-	0	-	0	-	0	-	0	-	-	-	CTX-M-15	aac(6')-Ian;aac(6')-Ib-cr.v2;strA.v1^;strB.v1	-	-	qnrB1.v2^	-	floR.v2*	-	sul2	tet(A).v1	-	dfrA14.v2*	OXA-1;SCO-1*;TEM-1D.v1^	-	SHV-28^	-	-	-	GyrA-83F;GyrA-87A;ParC-80I	KL48	K48	-	Typeable	97.71%	-	O1/O2v1	O1ab	-	Typeable
22242	2013-12-05	Peru	Blood	ST441	no	no	SAMN54588032	-	0	-	0	-	0	-	0	-	0	-	-	-	CTX-M-15	aac(3)-IIa.v1^;aac(6')-Ib-cr.v2;strA.v1^;strB.v1	-	-	-	-	-	-	sul2	-	-	dfrA14.v2*	OXA-1;TEM-1D.v1^	-	SHV-168^	146V	-	-	-	KL62	K62	-	Typeable	99.89%	-	O1/O2v1	O2a	-	Typeable
22243	2013-12-11	Peru	Blood	ST6234	no	no	SAMN54588033	-	0	-	0	-	0	-	0	-	0	-	-	-	CTX-M-15	aac(3)-IIa.v1^;aac(6')-Ib-cr.v2;strA.v1^;strB.v1	-	-	qnrB1.v2^	-	CatB4.v1?	-	sul2	tet(A).v1	-	dfrA14.v2*	OXA-1;TEM-1D.v1^	-	SHV-11^	35Q	-	-	-	KL42	K42	-	Typeable	100.00%	-	O4	O4	-	Typeable
22244	2013-12-23	Peru	Endotracheal tube secretion	ST441	no	no	SAMN54588034	-	0	-	0	-	0	-	0	-	0	-	-	-	CTX-M-15	aac(3)-IIa.v1^;aac(6')-Ib-cr.v2;strA.v1^;strB.v1	-	-	-	-	-	-	sul2	-	-	dfrA14.v2*	OXA-1;TEM-1D.v1^	-	SHV-168^	146V	-	-	-	KL62	K62	-	Typeable	99.89%	-	O1/O2v1	O2a	-	Typeable
22245	2013-12-24	Peru	Human	ST11	no	no	SAMN54588035	ybt 9; ICEKp3	183	-	0	-	0	-	0	-	0	-	-	-	CTX-M-15	aac(6')-Ian;aac(6')-Ib-cr.v2;aadA2^;aph3-Ia.v1^;strA.v1^;strB.v1	-	-	qnrS1	Mrx;mphA	floR.v1*	-	sul1;sul2	tet(A).v1	-	dfrA12	LAP-2;OXA-1;SCO-1*;TEM-1D.v1^	-	SHV-11	35Q	-	-	GyrA-83I;ParC-80I	KL15	K15	-	Typeable	99.92%	-	O4	O4	?2	Typeable
22246	2013-12-30	Peru	Blood	ST11	no	no	SAMN54588036	ybt 9; ICEKp3	183	-	0	-	0	-	0	-	0	-	-	-	CTX-M-15	aac(3)-IIa.v1^;aac(6')-Ian;aac(6')-Ib-cr.v2;aadA2^;aph3-Ia.v1^;strA.v1^;strB.v1	-	-	qnrS1	Mrx;mphA	floR.v1*	-	sul1;sul2	tet(A).v1	-	dfrA12	LAP-2;OXA-1;SCO-1*;TEM-1D.v1^	-	SHV-11	35Q	-	-	GyrA-83I;ParC-80I	KL15	K15	-	Typeable	99.92%	-	O4	O4	?2	Typeable
22247	2013-12-30	Peru	Urine	ST4845	no	no	SAMN54588037	-	0	-	0	-	0	-	0	-	0	-	-	-	CTX-M-15	aac(3)-IIa.v1^;aac(6')-Ib-cr.v2;strA.v1^;strB.v1	-	-	qnrS1	-	-	-	sul1;sul2	tet(A).v1	-	dfrA1.v1	OXA-1;TEM-1D.v1^	-	SHV-76	35Q	-	-	-	KL15	K15	?2-+	Typeable	97.22%	KL15_13_wckI;KL15_10_wcsR;KL15_14_wzx;KL15_11_wcaN;KL15_12_wzy;KL15_08_wceN;KL15_09_wceM;KL15_04_wza	O4	O4	-*	Untypeable
22248	2011-11-19	Peru	Urine	ST656	no	no	SAMN54588038	ybt 14; ICEKp5	382	-	0	-	0	-	0	-	0	-	-	-	CTX-M-15; SHV-12	aac(6')-Ib-cr.v2;aadA2^;aadA^;aph3-Ia.v1^;rmtG^;strA.v1;strB.v1	-	-	qnrB19^	Mrx;mphA	catB3.v2;cmlA1*	arr-3	sul2;sul3	-	-	dfrA12	OXA-1	-	-	-	OmpK35-18%	-	GyrA-83I;ParC-80I	KL177	unknown (KL177)	?7	Typeable	98.28%	-	OL13	O13	?7+!	Typeable
22250	2011-08-18	Peru	Pharyngeal secretion	ST833	no	no	SAMN54588039	-	0	-	0	-	0	-	0	-	0	-	-	-	CTX-M-15	aac(3)-IIa.v1^;aadA*;rmtG^;strA.v1^;strB.v1	-	-	qnrB1.v2^	-	floR.v1	-	sul2	tet(A).v1?	-	dfrA14.v2*	OXA-1;OXA-9.v1;TEM-1D.v1^	-	SHV-11	35Q	-	-	GyrA-83I;ParC-80I	KL52	K52	?6	Typeable	99.88%	-	OL13	O13	?6!	Typeable
22251	2011-10-06	Peru	Wound	ST348	no	no	SAMN54588040	-	0	-	0	-	0	-	0	-	0	-	-	-	CTX-M-15	aac(3)-IIa.v1^;aac(6')-Ib-cr.v2;strA.v1^;strB.v1	-	-	qnrB1.v2^	-	-	-	sul2	tet(A).v1	-	dfrA14.v2*	OXA-1;TEM-1D.v1^	-	SHV-11^	35Q	-	-	-	KL62	K62	-	Typeable	99.94%	-	O1/O2v1	O1ab	-	Typeable
22254	2011-11-11	Peru	Wound	ST13	no	no	SAMN54588041	-	0	-	0	-	0	-	0	-	0	-	-	-	CTX-M-15	aac(3)-IIa.v1^;aac(6')-Ib-cr.v2;strA.v1^;strB.v1	-	-	qnrB1.v2^	-	-	-	sul2	tet(A).v1	-	dfrA14.v2*	OXA-1	-	SHV-1^	-	-	-	-	KL3	K3	!	Typeable	99.97%	-	O1/O2v2	O1ab	-	Typeable
22255	2011-12-16	Peru	Urine	ST101	no	no	SAMN54588042	ybt 9; ICEKp3	183	-	0	-	0	-	0	-	0	-	-	-	CTX-M-15;CTX-M-24^	aac(3)-IId^;aac(6')-Ib-cr.v2;aph3-Ia.v1^;strA.v1*;strB.v1*	-	-	-	ermB.v1*	-	-	sul2	tet(D)	-	dfrA14.v2*	OXA-1;TEM-1D.v1^	-	SHV-1^	-	-	-	GyrA-83Y;GyrA-87G;ParC-80I	KL17	Capsule null	!	Typeable	100.00%	-	O1/O2v1	O1ab	-	Typeable
22256	2012-02-03	Peru	Respiratory	ST348	no	no	SAMN54588043	-	0	-	0	-	0	-	0	-	0	-	-	-	CTX-M-15	aac(3)-IIa.v1^;aac(6')-Ib-cr.v2;strA.v1^;strB.v1	-	-	qnrB1.v2^	-	-	-	sul2	tet(A).v1	-	dfrA14.v2*	OXA-1;TEM-1D.v1^	-	SHV-11^	35Q	-	-	-	KL62	K62	-	Typeable	99.94%	-	O1/O2v1	O1ab	-	Typeable
22258	2012-02-20	Peru	Urine	ST1161	no	no	SAMN54588044	-	0	-	0	-	0	-	0	-	0	-	-	-	CTX-M-15	aac(3)-IIa.v1;aac(3)-IV;aac(6')-Ian;aadA2^;aadA^;aph(4)-Ia;aph3-Ia.v1^	-	-	qnrB19^	Mrx;mphA	cmlA1*	-	sul1;sul2;sul3	tet(A).v1	-	dfrA12	SCO-1*;TEM-1D.v1^	-	SHV-187	-	OmpK35-40%	-	GyrA-83L;GyrA-87Y;ParC-80I	KL19	K19	-	Typeable	98.04%	-	O1/O2v2	O1ab	-	Typeable
22260	2012-07-19	Peru	Human	ST11	no	no	SAMN54588045	ybt 10; ICEKp4	97-4LV	-	0	-	0	-	0	-	0	-	-	-	CTX-M-15	aac(3)-IIa.v1;aac(6')-Ian;aac(6')-Ib-cr.v2^;aadA2;strB.v1	-	-	qnrB4	Mrx;mphA	catA1^;catB3.v2;floR.v2*	arr-3	sul1;sul2	-	-	-	DHA-1;OXA-1;SCO-1*;TEM-1D.v1^	-	SHV-11	35Q	OmpK35-64%	-	GyrA-83I;ParC-80I	KL141	unknown (KL141)	?2	Typeable	99.67%	-	O4	O4	-	Typeable
22261	2012-07-25	Peru	Human	ST11	no	no	SAMN54588046	ybt 10; ICEKp4	97-4LV	-	0	-	0	-	0	-	0	-	-	-	CTX-M-2^	aac(3)-IIa.v1;aac(6')-Ib-cr.v2^;aadA2;aph(3')-VIa;rmtG^	-	-	qnrB19^	-	catB3.v2	arr-3	sul1;sul2	tet(D)	-	-	OXA-1	-	-	-	OmpK35-64%	-	GyrA-83I;ParC-80I	KL141	unknown (KL141)	-	Typeable	99.67%	-	O4	O4	-	Typeable
22265	2012-09-20	Peru	Respiratory	ST1583	no	no	SAMN54588047	-	0	-	0	-	0	-	0	-	0	-	-	-	-	aac(3)-IV;aadA2;aadA^;aph(4)-Ia;aph3-Ia.v1^	-	-	qnrB19^	Mrx;mphA	cmlA1*	-	sul1;sul3	-	-	dfrA12	-	-	-	-	-	-	GyrA-83I;ParC-80I	KL102	unknown (KL102)	-	Typeable	99.69%	-	O1/O2v2	O2afg	-	Typeable
22266	2012-11-23	Peru	Urine	ST1583	no	no	SAMN54588048	-	0	-	0	-	0	-	0	-	0	-	-	-	-	aac(3)-IV;aadA2;aadA^;aph(4)-Ia	-	-	qnrB19^	-	cmlA1*	-	sul3	-	-	dfrA12	-	-	SHV-27	156D	-	-	GyrA-83I;ParC-80I	KL102	unknown (KL102)	-	Typeable	99.69%	-	O1/O2v2	O2afg	-	Typeable
22267	2012-12-17	Peru	Respiratory	ST1271	no	no	SAMN54588049	-	0	-	0	-	0	-	0	-	0	-	-	-	CTX-M-15	aac(3)-IIa.v1;aac(3)-IV;aac(6')-Ian;aadA2^;aadA^;aph(4)-Ia;strA.v1;strB.v1	-	-	qnrB5*	Mrx;mphA*	cmlA1*;floR.v2*	-	sul1;sul2;sul3	-	-	dfrA12	SCO-1*;TEM-1D.v1^	-	-	-	OmpK35-0%	-	GyrA-83Y	KL108	unknown (KL108)	-	Typeable	99.78%	-	O1/O2v2	O1ab	-	Typeable
22269	2013-02-16	Peru	Human	ST11	no	no	SAMN54588050	ybt 10; ICEKp4	97-4LV	-	0	-	0	-	0	-	0	-	-	-	-	aac(6')-Ib-cr.v2^;aadA2;aadA^;aph3-Ia.v1^	-	-	qnrB19^	Mrx;mphA	catA1^;catB3.v2;cmlA1*	arr-3	sul1;sul3	tet(A).v1	-	dfrA12	OXA-1	-	SHV-11	35Q	OmpK35-64%	-	GyrA-83I;ParC-80I	KL141	unknown (KL141)	-	Typeable	99.67%	-	O4	O4	-	Typeable
22270	2013-02-19	Peru	Human	ST11	no	no	SAMN54588051	-	0	-	0	-	0	-	0	-	0	-	-	-	CTX-M-2^;SHV-12	aac(3)-IIa.v1;aac(6')-Ib-cr.v2;aph(3')-VIa;rmtG^	-	-	qnrB19^	-	catB3.v2	arr-3	sul1;sul2	-	-	-	OXA-1	-	-	238S;240K;35Q	-	-	GyrA-83I;ParC-80I	KL23	K23	-	Typeable	99.92%	-	O1/O2v2	O2afg	-	Typeable
22271	2013-02-19	Peru	Human	ST11	no	no	SAMN54588052	-	0	-	0	-	0	-	0	-	0	-	-	-	CTX-M-2^;SHV-12	aac(3)-IIa.v1;aac(6')-Ib-cr.v2;aph(3')-VIa;rmtG^;strB.v1	-	-	qnrB19^	-	catB3.v2	arr-3	sul1;sul2	-	-	dfrA14.v2	OXA-1	-	-	238S;240K;35Q	-	-	GyrA-83I;ParC-80I	KL23	K23	-	Typeable	99.92%	-	O1/O2v2	O2afg	-	Typeable
22272	2012-08-23	Peru	Respiratory	ST129	no	no	SAMN54588053	-	0	-	0	-	0	-	0	-	0	-	-	-	-	aac(3)-IV;aph(4)-Ia;strA.v1;strB.v1	-	-	qnrB19^;qnrE2	-	cmlA1*	-	sul1;sul2;sul3	tet(D)	-	dfrA12	-	-	-	-	-	-	-	KL108	unknown (KL108)	-	Typeable	100.00%	-	O1/O2v2	O1ab	-	Typeable
22273	2012-09-05	Peru	Respiratory	ST147	no	no	SAMN54588054	-	0	-	0	-	0	-	0	-	0	-	-	-	CTX-M-15	aac(3)-IIa.v1^;aac(3)-IV;aac(6')-Ib-cr.v2;aadA2;aadA^;aph(4)-Ia;strA.v1^;strB.v1	-	-	qnrB1.v2^;qnrB19^	-	cmlA1*	-	sul2;sul3	tet(A).v1	-	dfrA14.v2*	OXA-1	-	SHV-11^	35Q	-	-	GyrA-83I;ParC-80I	KL64	K64	-	Typeable	100.00%	-	O1/O2v1	O2a	-	Typeable
22274	2013-03-23	Peru	Blood	ST1758	no	no	SAMN54588055	-	0	-	0	-	0	-	0	-	0	-	-	-	CTX-M-15	aac(3)-IIa.v1^;aac(6')-Ib-cr.v2;strA.v1^;strB.v1	-	-	qnrB1.v2^	-	-	-	sul2	tet(A).v1	-	dfrA14.v2*	OXA-1;TEM-1D.v1^	-	SHV-1^	-	-	-	-	KL27	K27	-	Typeable	99.80%	-	O4	O4	-	Typeable
22276	2013-04-26	Peru	Endometrial secretion	ST551	no	no	SAMN54588056	-	0	-	0	-	0	-	0	-	0	-	-	-	CTX-M-15	aac(3)-IIa.v1^;aac(6')-Ib-cr.v2;strA.v1^;strB.v1	-	-	qnrS1	-	-	-	sul2	-	-	dfrA14.v2*	LAP-2;OXA-1;TEM-1D.v1^	-	SHV-11^	35Q	-	-	-	KL10	K10	-	Typeable	98.64%	-	O1/O2v1	O1ab	-	Typeable
22277	2013-05-17	Peru	Device	ST147	no	no	SAMN54588057	-	0	-	0	-	0	-	0	-	0	-	-	-	CTX-M-15	aac(6')-Ib-cr.v2;strA.v1^;strB.v1	-	-	qnrB1.v2^;qnrB19^	-	-	-	sul2	tet(A).v1	-	dfrA14.v2*	OXA-1;TEM-1D.v1^	-	SHV-11^	35Q	-	-	GyrA-83I;ParC-80I	KL20	K20	-	Typeable	99.97%	-	O1/O2v1	O2a	-	Typeable
22278	2011-12-13	Peru	Urine	ST101	no	no	SAMN54588058	ybt 9; ICEKp3	183	-	0	-	0	-	0	-	0	-	-	-	CTX-M-15;CTX-M-24^	aac(3)-IId^;aac(6')-Ib-cr.v2;aph3-Ia.v1^;strA.v1*;strB.v1*	-	-	-	ermB.v1*	-	-	sul2	tet(D)	-	dfrA14.v2*	OXA-1;TEM-1D.v1^	-	SHV-1^	-	-	-	GyrA-83Y;GyrA-87G;ParC-80I	KL17	K17	-	Typeable	100.00%	-	O1/O2v1	O1ab	-	Typeable
22279	2012-03-23	Peru	Respiratory	ST348	no	no	SAMN54588059	ybt 10; ICEKp4	80-1LV	-	0	-	0	-	0	-	0	-	-	-	CTX-M-15	aac(3)-IIa.v1^;aac(6')-Ib-cr.v2;strA.v1^;strB.v1	-	-	qnrB1.v2^	-	-	-	sul2	tet(A).v1	-	dfrA14.v2*	OXA-1;TEM-1D.v1^	-	SHV-11^	35Q	-	-	-	KL62	K62	-	Typeable	99.94%	-	O1/O2v1	O1ab	-	Typeable
22280	2012-04-02	Peru	Respiratory	ST13	no	no	SAMN54588060	-	0	-	0	-	0	-	0	-	0	-	-	-	CTX-M-15	aac(3)-IIa.v1^;aac(6')-Ib-cr.v2;strA.v1^;strB.v1	-	-	qnrB1.v2^	-	-	-	sul2	tet(A).v1	-	dfrA14.v2*	OXA-1	-	SHV-1^	-	-	-	-	KL3	K3	!	Typeable	99.97%	-	O1/O2v2	O1ab	-	Typeable
22281	2012-05-18	Peru	Respiratory	ST198	no	no	SAMN54588061	ybt 16; ICEKp12	424-2LV	-	0	-	0	-	0	-	0	-	-	-	CTX-M-15	aac(3)-IIa.v1^;aac(6')-Ib-cr.v2;strA.v1^;strB.v1	-	-	qnrB1.v2^	-	catA1^	-	sul2^	tet(A).v1	-	dfrA14.v2*	OXA-1	-	SHV-77^	35Q	-	-	-	KL30	K30	!	Typeable	97.44%	-	O1/O2v1	O1ab	-	Typeable
22282	2012-05-24	Peru	Endometrial secretion	ST1271	no	no	SAMN54588062	-	0	-	0	-	0	-	0	-	0	-	-	-	CTX-M-2; SHV-12	aac(3)-IV;aac(6')-Ib-cr.v2;aadA2;aadA^;aph(3')-VIa;aph(4)-Ia;rmtG^;strA.v1;strB.v1	-	-	qnrB5*	Mrx;mphA	catB3.v2;cmlA1*	arr-3	sul1;sul2;sul3	-	-	-	OXA-1	-	-	-	-	MgrB-51%	GyrA-83Y	KL28	K28	-	Typeable	99.74%	-	O1/O2v2	O1ab	-	Typeable
22283	2012-06-30	Peru	Pharyngeal secretion	ST1271	no	no	SAMN54588063	-	0	-	0	-	0	-	0	-	0	-	-	-	-	aac(3)-IV;aadA2^;aadA^;aph(4)-Ia;strA.v1;strB.v1	-	-	qnrB5*	Mrx;mphA	catA1^;cmlA1*	-	sul1;sul3	-	-	dfrA12	-	-	SHV-187*	-	OmpK35-0%	-	GyrA-83Y	KL28	K28	-	Typeable	99.74%	-	O1/O2v2	O1ab	-	Typeable
22285	2012-08-23	Peru	Urine	ST5765	no	no	SAMN54588064	-	0	-	0	-	0	-	0	-	0	-	-	-	CTX-M-15	aac(3)-IIa.v1^;aac(6')-Ib-cr.v2;strA.v1^;strB.v1	-	-	qnrB1.v2^	-	-	-	sul2	tet(A).v1	-	dfrA14.v2*	OXA-1;TEM-1D.v1^	-	SHV-11^	35Q	-	-	-	KL31	K31	?4	Typeable	99.77%	-	O3b	O3b	?2	Typeable
875282	2018-03-20	Peru	Blood	ST147	yes	yes	SAMN54589117	-	0	-	0	iuc 5	62-2LV	-	0	-	0	-	-	NDM-1	CTX-M-15; TEM-26^	aac(3)-IIa.v1*;aac(6')-Ib-cr.v2;aadA2;aadA5;aadA^	mcr-1.1	-	qnrE2	lnuF.v1*	catA1^;catB3.v2;cmlA1*	arr-3	sul1;sul3	-	-	dfrA17	OXA-1	-	SHV-11^	35Q	-	-	GyrA-83I;ParC-80I	KL64	K64	-	Typeable	100.00%	-	O1/O2v1	O2a	-	Typeable
875152	2017-06-26	Peru	Respiratory	ST147	yes	no	SAMN54589105	-	0	-	0	iuc 5	62-2LV	-	0	-	0	-	-	NDM-1	CTX-M-15;TEM-17^	aac(3)-IIa.v1*;aac(6')-Ib-cr.v2;aadA2;aadA5;aadA^	-	-	-	lnuF.v1*	catA1^;catB3.v2;cmlA1*	arr-3	sul1;sul3	-	-	dfrA17	OXA-1	-	SHV-11^	35Q	-	-	GyrA-83I;ParC-80I	KL64	K64	-	Typeable	100.00%	-	O1/O2v1	O2a	-	Typeable
875178	2017-07-03	Peru	Respiratory	ST147	yes	no	SAMN54589107	-	0	-	0	iuc 5	62-2LV	-	0	-	0	-	-	NDM-1	CTX-M-15;TEM-17^	aac(3)-IIa.v1*;aac(6')-Ib-cr.v2;aadA2;aadA5;aadA^	-	-	qnrE2	lnuF.v1*	catA1^;catB3.v2;cmlA1*	arr-3	sul1;sul3	-	-	dfrA17	OXA-1	-	SHV-11^	35Q	-	-	GyrA-83I;ParC-80I	KL64	K64	-	Typeable	100.00%	-	O1/O2v1	O2a	-	Typeable
875992	2018-12-31	Peru	Respiratory	ST147	yes	no	SAMN54589187	-	0	-	0	iuc 5	62-2LV	-	0	-	0	-	-	NDM-1	CTX-M-15;TEM-26^	aac(3)-IIa.v1*;aac(6')-Ib-cr.v2;aadA5	-	-	qnrE2	-	catA1^;catB3.v2	arr-3	sul1	-	-	dfrA17	OXA-1	-	SHV-11^	35Q	-	-	GyrA-83I;ParC-80I	KL64	K64	-	Typeable	100.00%	-	O1/O2v1	O2a	-	Typeable
876808	2018-02-15	Peru	Wound	ST1	no	no	SAMN54589263	-	0	-	0	-	0	-	0	-	0	-	-	-	CTX-M-15	aac(3)-IIa.v1^;aac(6')-Ib-cr.v2;aadA2^;aph3-Ia.v1^;strA.v1^;strB.v1	-	-	qnrS1	Mrx;mphA	-	-	sul1;sul2	-	-	dfrA12;dfrA14.v2*	LAP-2;OXA-1;TEM-1D.v1^	-	SHV-1^	-	OmpK35-18%	-	GyrA-83I;ParC-80I	KL45	K45	-	Typeable	99.66%	-	O1/O2v2	O1ab	-	Typeable
875732	2018-09-08	Peru	Urine	ST1	no	no	SAMN54589161	-	0	-	0	-	0	-	0	-	0	-	-	-	-	aac(6')-IIc;aac(6')-Ib-cr.v2;aph3-Ia.v1*	-	-	qnrB1.v2^	-	-	-	sul1	tet(A).v1	-	dfrA14.v2*	OXA-1	-	SHV-1^	-	OmpK35-18%	MgrB-51%	GyrA-83I;ParC-80I	KL45	K45	?3	Typeable	99.62%	-	O1/O2v2	O1a	!	Typeable
877046	2019-06-16	Peru	Wound	ST1	no	no	SAMN54589286	-	0	-	0	-	0	-	0	-	0	-	-	-	CTX-M-15	aac(3)-IIa.v1^;aac(6')-Ib-cr.v2;strA.v1^;strB.v1	-	-	qnrB1.v2^	-	floR.v1*	-	sul2	tet(A).v1	-	dfrA14.v2*	OXA-1;TEM-1D.v1^	-	SHV-1^	-	OmpK35-18%	-	GyrA-83I;ParC-80I	KL45	K45	-	Typeable	99.68%	-	O1/O2v2	O1ab	-	Typeable
876938	2019-04-02	Peru	Wound	ST1045	no	no	SAMN54589276	-	0	-	0	-	0	-	0	-	0	-	-	-	CTX-M-15	aac(3)-IIa.v1^;aac(6')-Ib-cr.v2;aph(3')-IIa;strA.v1^;strB.v1	-	-	qnrB1.v2^	-	floR.v1*	-	sul2	tet(A).v1	-	dfrA14.v2*	TEM-1D.v1^	-	SHV-28^	-	-	-	GyrA-83F;GyrA-87A;ParC-80I	KL104	unknown (KL104)	?3	Typeable	99.83%	-	O1/O2v2	O1ab	-	Typeable
876962	2019-04-10	Peru	Wound	ST1045	no	no	SAMN54589279	-	0	-	0	-	0	-	0	-	0	-	-	-	CTX-M-15	aac(3)-IIa.v1^;aac(6')-Ib-cr.v2;aph(3')-IIa;strA.v1^;strB.v1	-	-	qnrB1.v2^	-	floR.v1*	-	sul2	tet(A).v1	-	dfrA14.v2*	TEM-1D.v1^	-	SHV-28^	-	-	-	GyrA-83F;GyrA-87A;ParC-80I	KL104	unknown (KL104)	?3	Typeable	99.83%	-	O1/O2v2	O1ab	-	Typeable
876874	2018-10-26	Peru	Wound	ST1045	no	no	SAMN54589270	-	0	-	0	-	0	-	0	-	0	-	-	-	CTX-M-15	aac(3)-IIa.v1^;aac(6')-Ib-cr.v2;aadA*;aadA2;aph(3')-IIa;strA.v1^;strB.v1	-	-	qnrB1.v2^	-	cmlA1*;floR.v1*	-	sul2;sul3	tet(A).v1	-	dfrA14.v2*;dfrA16.v2	CARB-2.v1^;TEM-1D.v1^	-	SHV-28^	-	-	-	GyrA-83F;GyrA-87A;ParC-80I	KL104	unknown (KL104)	?3	Typeable	99.83%	-	O1/O2v2	O1ab	-	Typeable
876904	2019-02-12	Peru	Wound	ST11	no	no	SAMN54589273	ybt 10; ICEKp4	26	-	0	-	0	-	0	-	0	-	-	-	CTX-M-15	aac(3)-IId^;aac(6')-Ib-cr.v2;strA.v1*;strB.v1*	-	-	qnrB1.v2^	-	-	-	sul2	tet(D)	-	dfrA14.v2*	OXA-1;TEM-1D.v1^	-	SHV-11	35Q	-	-	GyrA-83I;ParC-80I	KL105	unknown (KL105)	-	Typeable	99.98%	-	O1/O2v2	O2afg	-	Typeable
876988	2019-04-12	Peru	Wound	ST11	no	no	SAMN54589280	ybt 9; ICEKp3	183	-	0	-	0	-	0	-	0	-	-	-	CTX-M-15	aac(3)-IIa.v1^;aac(6')-Ib-cr.v2;aadA2^;aph3-Ia.v1^	-	-	qnrE1	Mrx;ermB.v1*;mphA	floR.v1	-	sul1	tet(A).v1?	-	dfrA12	OXA-1;TEM-1D.v1^	-	SHV-11	35Q	-	-	GyrA-83I;ParC-80I	KL64	K64	-	Typeable	99.98%	-	O1/O2v1	O2a	-	Typeable
877062	2019-07-18	Peru	Wound	ST11	no	no	SAMN54589288	-	0	-	0	-	0	-	0	-	0	-	-	-	CTX-M-15	aac(3)-IIa.v1^;aac(3)-IV;aac(6')-Ib-cr.v2;aadA2;aadA^;aph(4)-Ia;strA.v1^;strB.v1	-	-	qnrB1.v2^	-	cmlA1*	-	sul1;sul2;sul3	tet(A).v1	-	dfrA14.v2*	OXA-1;TEM-1D.v1^	-	SHV-11	35Q	OmpK35-10%	-	GyrA-83I;ParC-80I	KL64	K64	-	Typeable	100.00%	-	O1/O2v1	O2a	-	Typeable
875128	2017-03-07	Peru	Urine	ST11	no	no	SAMN54589102	ybt 10; ICEKp4	97-5LV	-	0	-	0	-	0	-	0	-	-	-	CTX-M-2^	aac(3)-IIa.v1;aac(6')-Ib-cr.v2;aadA2	-	-	qnrB4	-	catB3.v2	arr-3	sul1;sul2	-	-	-	DHA-1;OXA-1	-	SHV-11	35Q	OmpK35-64%	-	GyrA-83I;ParC-80I	KL141	unknown (KL141)	?2	Typeable	99.68%	-	O4	O4	-	Typeable
875136	2017-05-21	Peru	Urine	ST11	no	no	SAMN54589103	-	0	-	0	-	0	-	0	-	0	-	-	-	-	aac(6')-Ib-cr.v2^;aph3-Ia.v1^	-	-	qnrB4*	Mrx;mphA	catA1^;catB3.v2	arr-3	sul1	-	-	-	DHA-1;OXA-1*	-	SHV-11	35Q	OmpK35-40%;OmpK36-0%	-	GyrA-83I;GyrA-87N;ParC-80I	KL15	K15	!	Typeable	99.90%	-	O4	O4	-	Typeable
875896	2019-01-24	Peru	Blood	ST147	no	no	SAMN54589177	-	0	-	0	-	0	-	0	-	0	-	-	NDM-1	CTX-M-15;TEM-26^	aac(3)-IIa.v1*;aac(6')-Ib-cr.v2;aadA2^	-	-	qepA2*;qnrE2	Mrx;ermB.v1*;mphA*	catA1^;catB3.v2	arr-3	sul1	-	-	dfrA12	OXA-1	-	SHV-11^	35Q	OmpK36_c25t	-	GyrA-83I;ParC-80I	KL64	K64	-	Typeable	100.00%	-	O1/O2v1	O2a	-	Typeable
875900	2019-01-05	Peru	Fluid	ST147	no	no	SAMN54589178	-	0	-	0	-	0	-	0	-	0	-	-	-	-	aac(3)-IV^;aadA2^;aph(4)-Ia;aph3-Ia.v1^	-	-	-	-	floR.v1*	-	sul2	tet(A).v1	-	dfrA12	TEM-1D.v1^	-	SHV-11^	35Q	-	-	GyrA-83I;ParC-80I	KL14	K14	?3	Typeable	100.00%	-	O3b	O3b	?4	Typeable
875942	2019-01-07	Peru	Urine	ST147	no	no	SAMN54589182	-	0	-	0	-	0	-	0	-	0	-	-	-	SHV-12	aadA2^;aph3-Ia.v1^;strA.v1;strB.v1	-	-	qnrS1	Mrx;mphA	-	-	sul1;sul2	tet(A).v1	-	dfrA12	LAP-2	-	-	238S;240K;35Q	-	-	GyrA-83I;ParC-80I	KL64	K64	-	Typeable	99.99%	-	O1/O2v1	O2a	-	Typeable
875506	2018-08-06	Peru	Urine	ST11	no	no	SAMN54589138	ybt 9; ICEKp3	183	-	0	-	0	-	0	-	0	-	-	KPC-2	CTX-M-96*	aac(3)-IIa.v1^;aac(6')-Ib-cr.v2;rmtG;strA.v1^;strB.v1	-	-	qnrB1.v2^;qnrS1	-	-	-	sul2	tet(A).v1	-	dfrA14.v2*	LAP-2;OXA-1;TEM-1D.v1^	-	SHV-11	35Q	-	-	GyrA-83I;ParC-80I	KL15	K15	-	Typeable	99.92%	-	O4	O4	-	Typeable
875598	2018-08-06	Peru	Urine	ST11	no	no	SAMN54589147	ybt 9; ICEKp3	183	-	0	-	0	-	0	-	0	-	-	KPC-2	CTX-M-15^	aac(3)-IIa.v1^;aac(6')-Ib-cr.v2;rmtG;strA.v1^;strB.v1	-	-	qnrB1.v2^;qnrS1	-	-	-	sul2	tet(A).v1	-	dfrA14.v2*	LAP-2;OXA-1;TEM-1D.v1^	-	SHV-11	35Q	-	-	GyrA-83I;ParC-80I	KL15	K15	-	Typeable	99.92%	-	O4	O4	-	Typeable
875812	2018-11-23	Peru	Blood	ST11	no	no	SAMN54589169	ybt 9; ICEKp3	183	-	0	-	0	-	0	-	0	-	-	KPC-2	CTX-M-15^	aac(3)-IIa.v1^;aac(6')-Ib-cr.v2;rmtG;strA.v1^;strB.v1	-	-	qnrB1.v2^;qnrS1	-	-	-	sul2	tet(A).v1	-	dfrA14.v2*	LAP-2;OXA-1;TEM-1D.v1^	-	SHV-11	35Q	-	-	GyrA-83I;ParC-80I	KL15	K15	-	Typeable	99.92%	-	O4	O4	-	Typeable
875492	2018-09-24	Peru	Urine	ST11	no	no	SAMN54589137	ybt 9; ICEKp3	183	-	0	-	0	-	0	-	0	-	-	KPC-2	CTX-M-15	aac(3)-IIa.v1^;aac(6')-Ib-cr.v2;strA.v1^;strB.v1	-	-	qnrB1.v2^;qnrS1	-	-	-	sul2	tet(A).v1	-	dfrA14.v2*	LAP-2;OXA-1;TEM-1D.v1^	-	SHV-11	35Q	-	-	GyrA-83I;ParC-80I	KL15	K15	-	Typeable	99.92%	-	O4	O4	-	Typeable
875580	2018-10-15	Peru	Urine	ST11	no	no	SAMN54589146	ybt 9; ICEKp3	183	-	0	-	0	-	0	-	0	-	-	KPC-2	CTX-M-15	aac(3)-IIa.v1^;aac(6')-Ib-cr.v2;strA.v1^;strB.v1	-	-	qnrB1.v2^;qnrS1	-	-	-	sul2	tet(A).v1	-	dfrA14.v2*	LAP-2;OXA-1;TEM-1D.v1^	-	SHV-11	35Q	-	-	GyrA-83I;ParC-80I	KL15	K15	-	Typeable	99.92%	-	O4	O4	-	Typeable
876778	2018-01-12	Peru	Wound	ST11	no	no	SAMN54589260	-	0	-	0	-	0	-	0	-	0	-	-	-	CTX-M-55	aac(6')-Ib-cr.v2^;aadA2^;aph3-Ia.v1^;rmtB	-	fosA3	qnrB4*	Mrx;mphA	catA1^;catB3.v2	arr-3	sul1	tet(A).v1	-	dfrA12	DHA-1;OXA-1*	-	SHV-11	35Q	OmpK35-40%	-	GyrA-83I;ParC-80I	KL15	K15	-	Typeable	99.92%	-	O4	O4	-	Typeable
875160	2017-07-18	Peru	Respiratory	ST147	no	no	SAMN54589106	-	0	-	0	-	0	-	0	-	0	-	-	NDM-1	CTX-M-15;TEM-12	aac(3)-IIa.v1*;aac(6')-Ib-cr.v2;aadA5	-	-	qnrE2	-	catA1^;catB3.v2	arr-3	sul1	-	-	dfrA17	OXA-1	-	SHV-11^	35Q	-	-	GyrA-83I;ParC-80I	KL64	K64	-	Typeable	100.00%	-	O1/O2v1	O2a	-	Typeable
875984	2018-12-04	Peru	Blood	ST11	no	no	SAMN54589186	-	0	-	0	-	0	-	0	-	0	-	-	-	CTX-M-27	aac(6')-Ib-cr.v2;aadA16*;aph3-Ia.v1^	-	-	qnrB4	Mrx;mphA	floR.v1*	arr-3	sul1	tet(D)	-	dfrA27	DHA-1	-	SHV-11	35Q	OmpK35-8%	-	GyrA-83I;ParC-80I	KL111	unknown (KL111)	-	Typeable	99.63%	-	O3b	O3b	-	Typeable
876816	2018-03-22	Peru	Wound	ST11	no	no	SAMN54589264	ybt 9; ICEKp3	183	-	0	-	0	-	0	-	0	-	-	-	CTX-M-15	aac(3)-IIa.v1^;aac(6')-Ian;aac(6')-Ib-cr.v2;strA.v1^;strB.v1	-	-	-	Mrx;mphA	-	arr-3	sul1;sul2	-	-	dfrA14.v2*	OXA-1;SCO-1*;TEM-1D.v1^	-	SHV-11	35Q	-	-	GyrA-83I;ParC-80I	KL15	K15	-	Typeable	99.92%	-	O4	O4	?2	Typeable
875320	2018-04-07	Peru	Urine	ST11	no	no	SAMN54589121	ybt 9; ICEKp3	183	-	0	-	0	-	0	-	0	-	-	-	CTX-M-15	aac(6')-Ib-cr.v2;aadA2^;aph3-Ia.v1^	-	-	qnrE1	Mrx;mphA	catII.2*	-	sul1	tet(A).v1	-	dfrA12	OXA-1	-	SHV-11	35Q	-	-	GyrA-83I;ParC-80I	KL15	K15	-	Typeable	99.92%	-	O4	O4	?2	Typeable
875678	2018-10-21	Peru	Blood	ST11	no	no	SAMN54589155	ybt 9; ICEKp3	183	-	0	-	0	-	0	-	0	-	-	-	CTX-M-15	aac(3)-IIa.v1^;strA.v1^;strB.v1	-	-	-	-	-	-	sul2	-	-	-	-	-	SHV-11	35Q	OmpK36-75%	MgrB-0%	GyrA-83I;ParC-80I	KL15	K15	-	Typeable	99.92%	-	O4	O4	?2	Typeable
875426	2018-07-03	Peru	Blood	ST147	no	no	SAMN54589130	-	0	-	0	-	0	-	0	-	0	-	-	NDM-1	CTX-M-15;TEM-26^	aac(3)-IIa.v1*;aac(6')-Ib-cr.v2;aadA2^	-	-	qepA2*;qnrE2	Mrx;ermB.v1*;mphA*	catA1^;catB3.v2	arr-3	sul1	-	-	dfrA12	OXA-1	-	SHV-11^	35Q	-	-	GyrA-83I;ParC-80I	KL64	K64	-	Typeable	100.00%	-	O1/O2v1	O2a	-	Typeable
875556	2018-09-30	Peru	Device	ST147	no	no	SAMN54589143	-	0	-	0	-	0	-	0	-	0	-	-	NDM-1	CTX-M-15;TEM-26^	aac(3)-IIa.v1*;aac(6')-Ib-cr.v2	-	-	qnrE2	-	catB3.v2	arr-3	sul1	-	-	-	OXA-1	-	SHV-11^	35Q	-	-	GyrA-83I;ParC-80I	KL64	K64	-	Typeable	100.00%	-	O1/O2v1	O2a	-	Typeable
875602	2018-07-15	Peru	Fluid	ST147	no	no	SAMN54589148	-	0	-	0	-	0	-	0	-	0	-	-	NDM-1	CTX-M-15;TEM-26^	aac(3)-IIa.v1*;aac(6')-Ib-cr.v2;aadA2^	-	-	qepA2*;qnrE2	Mrx;ermB.v1*;mphA*	catA1^;catB3.v2	arr-3	sul1	-	-	dfrA12	OXA-1	-	SHV-11^	35Q	OmpK36-75%	-	GyrA-83I;ParC-80I	KL64	K64	-	Typeable	100.00%	-	O1/O2v1	O2a	-	Typeable
875740	2018-11-24	Peru	Urine	ST147	no	no	SAMN54589162	-	0	-	0	-	0	-	0	-	0	-	-	NDM-1	CTX-M-15;TEM-26^	aac(3)-IIa.v1*;aac(6')-Ib-cr.v2;aadA2^	-	-	qepA2*;qnrE2	ermB.v1*;mphA*	catA1^;catB3.v2	arr-3	sul1	-	-	dfrA12	OXA-1	-	SHV-11^	35Q	OmpK36_c25t	-	GyrA-83I;ParC-80I	KL64	K64	-	Typeable	100.00%	-	O1/O2v1	O2a	-	Typeable
875838	2018-11-24	Peru	Urine	ST147	no	no	SAMN54589171	-	0	-	0	-	0	-	0	-	0	-	-	NDM-1	CTX-M-15;TEM-26^	aac(3)-IIa.v1*;aac(6')-Ib-cr.v2;aadA2^	-	-	qepA2*;qnrE2	Mrx;ermB.v1*;mphA*	catA1^;catB3.v2	arr-3	sul1	-	-	dfrA12	OXA-1	-	SHV-11^	35Q	OmpK36_c25t	-	GyrA-83I;ParC-80I	KL64	K64	-	Typeable	100.00%	-	O1/O2v1	O2a	-	Typeable
875846	2018-11-15	Peru	Blood	ST147	no	no	SAMN54589172	-	0	-	0	-	0	-	0	-	0	-	-	NDM-1	CTX-M-15;TEM-26^	aac(3)-IIa.v1*;aac(6')-Ib-cr.v2;aadA2^;strB.v1	-	-	qepA2*;qnrE2	Mrx;ermB.v1*;mphA*	catA1^;catB3.v2	arr-3	sul1;sul2	-	-	dfrA12;dfrA14.v2	OXA-1	-	SHV-11^	35Q	OmpK36_c25t	-	GyrA-83I;ParC-80I	KL64	K64	-	Typeable	100.00%	-	O1/O2v1	O2a	-	Typeable
875870	2018-12-01	Peru	Blood	ST147	no	no	SAMN54589175	-	0	-	0	-	0	-	0	-	0	-	-	NDM-1	CTX-M-15;TEM-26^	aac(3)-IIa.v1*;aac(6')-Ib-cr.v2;aadA2^	-	-	qepA2*;qnrE2	Mrx;ermB.v1*;mphA*	catA1^;catB3.v2	arr-3	sul1	-	-	dfrA12	OXA-1	-	SHV-11^	35Q	OmpK36_c25t	-	GyrA-83I;ParC-80I	KL64	K64	-	Typeable	100.00%	-	O1/O2v1	O2a	-	Typeable
875758	2018-11-15	Peru	Blood	ST147	no	no	SAMN54589163	-	0	-	0	-	0	-	0	-	0	-	-	NDM-1	CTX-M-15;TEM-17^	aac(3)-IIa.v1*;aac(6')-Ib-cr.v2;aadA2^	-	-	qepA2*;qnrE2	Mrx;ermB.v1*;mphA*	catA1^;catB3.v2	arr-3	sul1	-	-	dfrA12	OXA-1	-	SHV-11^	35Q	OmpK36_c25t	-	GyrA-83I;ParC-80I	KL64	K64	-	Typeable	100.00%	-	O1/O2v1	O2a	-	Typeable
876752	2017-11-30	Peru	Wound	ST15	no	no	SAMN54589258	-	0	-	0	-	0	-	0	-	0	-	-	-	CTX-M-15	aac(3)-IIa.v1^;aac(6')-Ib-cr.v2;strA.v1^;strB.v1	-	-	qnrB1.v2^	-	-	-	sul2	tet(A).v1	-	dfrA14.v2*	OXA-1	-	SHV-28^	-	-	-	GyrA-83F;GyrA-87A;ParC-80I	KL48	K48	-	Typeable	97.70%	-	O1/O2v1	O1ab	-	Typeable
875396	2018-06-20	Peru	Urine	ST15	no	no	SAMN54589127	-	0	-	0	-	0	-	0	-	0	-	-	NDM-1	PER-2	aac(6')-Ian;aac(6')-Ib-cr.v2	-	-	qnrVC1	-	catB3.v2;catII.1*	arr-3	sul1;sul2	-	-	dfrA6.1*	OXA-1	-	SHV-28^	-	OmpK35-35%	-	GyrA-83F;GyrA-87A;ParC-80I	KL64	K64	-	Typeable	99.79%	-	O1/O2v1	O1ab	-	Typeable
875232	2018-01-17	Peru	Urine	ST15	no	no	SAMN54589112	-	0	-	0	-	0	-	0	-	0	-	-	NDM-1	CTX-M-15;TEM-26^	aac(3)-IIa.v1*;aac(6')-Ib-cr.v2;aadA2^;aph3-Ia.v1^;strB.v1	-	-	qnrE2	Mrx;mphA	catA1^	arr-3	sul1;sul2	tet(A).v1	-	dfrA12;dfrA14.v2	OXA-1	-	SHV-28^	-	-	-	GyrA-83F;GyrA-87A;ParC-80I	KL24	K24	?2	Typeable	99.99%	-	O1/O2v1	O1ab	-	Typeable
875388	2018-06-19	Peru	Urine	ST15	no	no	SAMN54589126	ybt 10; ICEKp4	28	-	0	-	0	-	0	-	0	-	-	NDM-1	CTX-M-15;TEM-26^	aac(3)-IIa.v1*;aac(6')-Ib-cr.v2;aadA2^;aph3-Ia.v1^	-	-	qnrE2	Mrx;mphA	catA1^;catB3.v2	arr-3	sul1	tet(A).v1	-	dfrA12	OXA-1	-	SHV-28^	-	-	-	GyrA-83F;GyrA-87A;ParC-80I	KL24	K24	-	Typeable	100.00%	-	O1/O2v1	O1ab	-	Typeable
875976	2018-12-05	Peru	Urine	ST15	no	no	SAMN54589185	-	0	-	0	-	0	-	0	-	0	-	-	-	CTX-M-15	aac(6')-Ib-cr.v2;aadA2^;strA.v1^;strB.v1	-	-	qepA2*;qnrB1.v2^	-	-	-	sul1;sul2	tet(D)	-	dfrA12;dfrA14.v2*	OXA-1;TEM-1D.v1^	-	SHV-28^	-	-	-	GyrA-83F;GyrA-87A;ParC-80I	KL48	K48	-	Typeable	97.70%	-	O1/O2v1	O1ab	-	Typeable
876832	2018-05-24	Peru	Wound	ST15	no	no	SAMN54589266	-	0	-	0	-	0	-	0	-	0	-	-	-	CTX-M-15	aac(3)-IIa.v1^;aac(6')-Ib-cr.v2;aadA2^;aph3-Ia.v1^;strA.v1^	-	-	-	-	catA1^	-	sul1;sul2	tet(A).v1	-	dfrA12;dfrA14.v2*	OXA-1	-	SHV-28^	-	-	-	GyrA-83F;GyrA-87A;ParC-80I	KL117	unknown (KL117)	-	Typeable	99.95%	-	O1/O2v1	O1ab	-	Typeable
875266	2018-02-19	Peru	Urine	ST2031	no	no	SAMN54589115	-	0	-	0	-	0	-	0	-	0	-	-	NDM-1	TEM-26^	aac(3)-IIa.v1*;armA	-	-	qnrE2	mphE.v2;msrE	catA1^;catB3.v2	arr-3	sul1;sul2	-	-	dfrA27	OXA-1	-	SHV-11	35Q	OmpK35-38%	-	GyrA-83I;ParC-80I	KL102	unknown (KL102)	-	Typeable	99.64%	-	O1/O2v2	O1ab	-	Typeable
875274	2018-03-22	Peru	Urine	ST2031	no	no	SAMN54589116	-	0	-	0	-	0	-	0	-	0	-	-	NDM-1	CTX-M-27;TEM-26^	aac(3)-IIa.v1*;aadA16*;aph3-Ia.v1^;armA	-	-	qnrE2	Mrx;mphA;mphE.v2;msrE	catB3.v2;floR.v1*	arr-3	sul1;sul2	tet(D)	-	dfrA27	OXA-1	-	SHV-11	35Q	OmpK35-38%	-	GyrA-83I;ParC-80I	KL102	unknown (KL102)	-	Typeable	99.64%	-	O1/O2v2	O1ab	-	Typeable
875312	2018-05-16	Peru	Abscess	ST2031	no	no	SAMN54589120	-	0	-	0	-	0	-	0	-	0	-	-	NDM-1	CTX-M-27;TEM-26^	aac(3)-IIa.v1*;aph3-Ia.v1^;armA	-	-	qnrE2	Mrx;mphA;mphE.v2;msrE	catA1^;catB3.v2;floR.v1*	arr-3	sul1;sul2	tet(D)	-	dfrA27	OXA-1	-	SHV-11	35Q	OmpK35-38%	-	GyrA-83I;ParC-80I	KL102	unknown (KL102)	-	Typeable	99.64%	-	O1/O2v2	O1ab	-	Typeable
875362	2018-05-22	Peru	Respiratory	ST2031	no	no	SAMN54589124	-	0	-	0	-	0	-	0	-	0	-	-	NDM-1	CTX-M-27;TEM-26^	aac(3)-IIa.v1*;aac(6')-Ib-cr.v2;aadA16*;armA	-	-	qnrE2	Mrx;mphA;mphE.v2;msrE	catA1^;catB3.v2;floR.v1*	arr-3	sul1;sul2	tet(D)	-	dfrA27	OXA-1	-	SHV-11	35Q	OmpK35-38%	-	GyrA-83I;ParC-80I	KL102	unknown (KL102)	-	Typeable	99.64%	-	O1/O2v2	O1ab	-	Typeable
877020	2019-05-16	Peru	Wound	ST15	no	no	SAMN54589284	-	0	-	0	-	0	-	0	-	0	-	-	-	CTX-M-15	aac(3)-IIa.v1^;aac(6')-Ib-cr.v2;strA.v1^	-	-	-	-	floR.v1*	-	sul2	tet(A).v1?	-	dfrA14.v2*	OXA-1;TEM-1D.v1^	-	SHV-28^	-	-	-	GyrA-83F;GyrA-87A;ParC-80I	KL64	K64	-	Typeable	99.79%	-	O1/O2v1	O1ab	-	Typeable
877054	2019-06-25	Peru	Wound	ST15	no	no	SAMN54589287	-	0	-	0	-	0	-	0	-	0	-	-	-	CTX-M-15	aac(3)-IIa.v1^;aac(6')-Ib-cr.v2;strA.v1^;strB.v1	-	-	qnrB1.v2^	-	-	-	sul2	tet(A).v1	-	dfrA14.v2*	OXA-1;TEM-1D.v1^	-	SHV-28^	-	-	-	GyrA-83F;GyrA-87A;ParC-80I	KL24	Capsule null	!	Typeable	100.00%	-	O1/O2v1	O1ab	-	Typeable
876890	2019-01-03	Peru	Wound	ST15	no	no	SAMN54589272	-	0	-	0	-	0	-	0	-	0	-	-	-	CTX-M-15; SHV-12	aac(3)-IIa.v1;aac(6')-Ian;aadA16*;aadA2^;aph3-Ia.v1^;strA.v1;strB.v1	-	-	qnrB19^	Mrx;mphA	catA1^	-	sul1;sul2	-	-	dfrA12	SCO-1*;TEM-1D.v1^	-	-	-	OmpK35-64%	-	GyrA-83F;GyrA-87A;ParC-80I	KL24	K24	-	Typeable	99.98%	-	O1/O2v1	O1ab	-	Typeable
875304	2018-04-07	Peru	Wound	ST307	no	no	SAMN54589119	-	0	-	0	-	0	-	0	-	0	-	-	NDM-1	TEM-12	aac(3)-IIa.v1*;aac(6')-Ib-cr.v2	-	-	qnrE2	-	catA1^;catB3.v2	arr-3	sul1	-	-	-	OXA-1	-	SHV-28^	-	-	-	GyrA-83I;ParC-80I	KL102	unknown (KL102)	-	Typeable	99.66%	-	O1/O2v2	O2afg	-	Typeable
875224	2018-01-15	Peru	Respiratory	ST307	no	no	SAMN54589111	-	0	-	0	-	0	-	0	-	0	-	-	NDM-1	CTX-M-15;TEM-26^	aac(6')-Ib-cr.v2;strA.v1^;strB.v1	-	-	qnrB1.v2^;qnrE2	-	catA1^	arr-3	sul1;sul2	tet(A).v1	-	dfrA14.v2*	OXA-1	-	SHV-28^	-	-	-	GyrA-83I;ParC-80I	KL102	unknown (KL102)	?2	Typeable	99.65%	-	O1/O2v2	O2afg	-	Typeable
875290	2018-03-31	Peru	Blood	ST307	no	no	SAMN54589118	-	0	-	0	-	0	-	0	-	0	-	-	NDM-1	CTX-M-15;TEM-26^	aac(3)-IIa.v1*;aac(6')-Ib-cr.v2;strA.v1^;strB.v1	-	-	qnrB1.v2^;qnrE2	-	catA1^	arr-3	sul1;sul2	tet(A).v1	-	dfrA14.v2*	OXA-1	-	SHV-28^	-	-	-	GyrA-83I;ParC-80I	KL102	unknown (KL102)	?2	Typeable	99.61%	-	O1/O2v2	O2afg	-	Typeable
875804	2018-11-13	Peru	Blood	ST307	no	no	SAMN54589168	-	0	-	0	-	0	-	0	-	0	-	-	NDM-1	CTX-M-15;TEM-26^	aac(6')-Ib-cr.v2;strA.v1^;strB.v1	-	-	qnrB1.v2^;qnrE2	-	-	arr-3	sul1;sul2	tet(A).v1	-	dfrA14.v2*	OXA-1	-	SHV-28^	-	-	-	GyrA-83I;ParC-80I	KL102	unknown (KL102)	-	Typeable	99.66%	-	O1/O2v2	O2afg	-	Typeable
875468	2018-09-13	Peru	Blood	ST348	no	no	SAMN54589134	ybt 22; ICEKp12	13-1LV	-	0	-	0	-	0	-	0	-	-	NDM-1	CTX-M-15;TEM-26	aac(3)-IIa.v1*;aac(6')-Ib-cr.v2;strA.v1^;strB.v1	-	-	qnrE2	-	catA1^;catB3.v2	arr-3	sul1;sul2	-	-	-	OXA-1	-	SHV-11^	35Q	OmpK36-63%	-	-	KL62	K62	-	Typeable	99.93%	-	O1/O2v1	O1ab	-	Typeable
875522	2018-10-05	Peru	Surveillance	ST348	no	no	SAMN54589140	ybt 22; ICEKp12	13-1LV	-	0	-	0	-	0	-	0	-	-	NDM-1	CTX-M-15;TEM-12^	aac(3)-IIa.v1*;aac(6')-Ib-cr.v2;strA.v1^;strB.v1	-	-	qnrB1.v2^;qnrE2	-	catA1^;catB3.v2	arr-3	sul1;sul2	-	-	dfrA14.v2*	OXA-1	-	SHV-11^	35Q	OmpK36-63%	-	-	KL62	K62	-	Typeable	99.93%	-	O1/O2v1	O1ab	-	Typeable
875572	2018-10-12	Peru	Blood	ST348	no	no	SAMN54589145	ybt 22; ICEKp12	13-1LV	-	0	-	0	-	0	-	0	-	-	NDM-1	CTX-M-15;TEM-12^	aac(3)-IIa.v1*;aac(6')-Ib-cr.v2;strA.v1^;strB.v1	-	-	qnrE2	-	catA1^;catB3.v2	arr-3	sul1;sul2	-	-	-	OXA-1	-	SHV-11^	35Q	OmpK36-63%	-	-	KL62	K62	-	Typeable	99.93%	-	O1/O2v1	O1ab	-	Typeable
875686	2018-10-23	Peru	Fluid	ST348	no	no	SAMN54589156	ybt 22; ICEKp12	13-1LV	-	0	-	0	-	0	-	0	-	-	NDM-1	CTX-M-15; TEM-12	aac(3)-IIa.v1*;aac(6')-Ib-cr.v2;strA.v1^;strB.v1	-	-	qnrE2	-	catA1^;catB3.v2	arr-3	sul1;sul2	-	-	-	OXA-1	-	SHV-11^	35Q	OmpK36-63%	-	-	KL62	K62	-	Typeable	99.93%	-	O1/O2v1	O1ab	-	Typeable
875530	2018-10-05	Peru	Surveillance	ST348	no	no	SAMN54589141	ybt 22; ICEKp12	13-1LV	-	0	-	0	-	0	-	0	-	-	NDM-1	CTX-M-15	aac(6')-Ib-cr.v2;strA.v1^;strB.v1	-	-	qnrB1.v2^	-	catA1^;catB3.v2	arr-3	sul1;sul2	-	-	dfrA14.v2*	OXA-1;TEM-1D.v1^	-	SHV-11^	35Q	OmpK36-63%	-	-	KL62	K62	-	Typeable	99.93%	-	O1/O2v1	O1ab	-	Typeable
875918	2019-01-08	Peru	Respiratory	ST1844	no	no	SAMN54589179	-	0	-	0	-	0	-	0	-	0	-	-	KPC-2	-	rmtG	-	-	-	-	-	-	sul2	-	-	-	TEM-1D.v1^	-	SHV-28^	-	OmpK35-5%	-	GyrA-83F;GyrA-87A;ParC-80I	KL54	K54	-	Typeable	99.95%	-	O1/O2v2	O1ab	-	Typeable
875926	2019-01-23	Peru	Abscess	ST1844	no	no	SAMN54589180	-	0	-	0	-	0	-	0	-	0	-	-	KPC-2	-	rmtG;strA.v1*;strB.v1*	-	-	qnrB6^	-	catII.2*	arr-3	sul1;sul2	tet(D)	-	dfrA27	TEM-1D.v1^	-	SHV-28^	-	OmpK35-5%	-	GyrA-83F;GyrA-87A;ParC-80I	KL54	Capsule null	!	Typeable	99.76%	-	O1/O2v2	O1ab	-	Typeable
875934	2019-01-25	Peru	Wound	ST1844	no	no	SAMN54589181	-	0	-	0	-	0	-	0	-	0	-	-	KPC-2	CTX-M-12	rmtG	-	-	-	-	-	-	sul2	-	-	-	TEM-1D.v1^	-	SHV-28^	-	OmpK35-5%	-	GyrA-83F;GyrA-87A;ParC-80I	KL54	K54	-	Typeable	99.98%	-	O1/O2v2	O1ab	-	Typeable
875548	2018-10-05	Peru	Surveillance	ST348	no	no	SAMN54589142	ybt 22; ICEKp12	13-1LV	-	0	-	0	-	0	-	0	-	-	NDM-1	CTX-M-15	aac(6')-Ib-cr.v2;strA.v1^;strB.v1	-	-	-	-	catA1^;catB3.v2	arr-3	sul1;sul2	-	-	-	OXA-1;TEM-1D.v1^	-	SHV-11^	35Q	OmpK36-63%	-	-	KL62	K62	-	Typeable	99.93%	-	O1/O2v1	O1ab	-	Typeable
875820	2018-12-15	Peru	Blood	ST348	no	no	SAMN54589170	ybt 22; ICEKp12	13-1LV	-	0	-	0	-	0	-	0	-	-	NDM-1	CTX-M-15	aac(3)-IIa.v1*;aac(6')-Ib-cr.v2;strA.v1^;strB.v1	-	-	qnrE2	-	catA1^;catB3.v2	arr-3	sul1;sul2	-	-	-	OXA-1;TEM-1D.v1^	-	SHV-11^	35Q	OmpK36-63%	-	-	KL62	K62	-	Typeable	99.93%	-	O1/O2v1	O1ab	-	Typeable
875854	2018-11-29	Peru	Urine	ST348	no	no	SAMN54589173	ybt 22; ICEKp12	13-1LV	-	0	-	0	-	0	-	0	-	-	NDM-1	CTX-M-15	aac(3)-IIa.v1*;aac(6')-Ib-cr.v2;strA.v1^;strB.v1	-	-	qnrE2	-	catA1^;catB3.v2	arr-3	sul1;sul2	-	-	-	OXA-1;TEM-1D.v1^	-	SHV-11^	35Q	OmpK36-63%	-	-	KL62	K62	-	Typeable	99.93%	-	O1/O2v1	O1ab	-	Typeable
875862	2018-12-15	Peru	Blood	ST348	no	no	SAMN54589174	ybt 22; ICEKp12	13-1LV	-	0	-	0	-	0	-	0	-	-	NDM-1	CTX-M-15	aac(3)-IIa.v1*;aac(6')-Ib-cr.v2;strA.v1^;strB.v1	-	-	qnrE2	-	catA1^;catB3.v2	arr-3	sul1;sul2	-	-	-	OXA-1;TEM-1D.v1^	-	SHV-11^	35Q	OmpK36-63%	-	-	KL62	K62	-	Typeable	99.93%	-	O1/O2v1	O1ab	-	Typeable
875790	2018-11-02	Peru	Urine	ST45	no	no	SAMN54589167	ybt 10; ICEKp4	78	-	0	-	0	-	0	-	0	-	-	NDM-1	TEM-26^	aac(3)-IIa.v1*;aac(6')-Ib-cr.v2	-	-	qnrB19^;qnrE2	Mrx;mphA	catA1^	-	sul1	-	-	-	OXA-1	-	SHV-1	-	OmpK36_c25t	-	-	KL62	K62	-	Typeable	99.97%	-	O1/O2v1	O2a	-	Typeable
875240	2018-02-08	Peru	Blood	ST45	no	no	SAMN54589113	ybt 10; ICEKp4	78	-	0	-	0	-	0	-	0	-	-	NDM-1	CTX-M-15;TEM-26^	aac(3)-IIa.v1*;aac(6')-Ib-cr.v2;aadA2^;aph3-Ia.v1^	-	-	qnrB19^;qnrE2	Mrx;mphA	catA1^	arr-3	sul1	-	-	dfrA12	OXA-1	-	SHV-1	-	-	-	-	KL62	K62	-	Typeable	99.97%	-	O1/O2v1	O2a	?2	Typeable
875476	2018-08-22	Peru	Fluid	ST17	no	no	SAMN54589135	ybt 15; ICEKp11	231	-	0	-	0	-	0	-	0	-	-	KPC-2	CTX-M-12	rmtG	-	-	-	-	-	-	sul2	-	-	dfrA26	TEM-1D.v1^	-	SHV-11^	35Q	-	-	-	KL25	K25	!	Typeable	99.65%	-	O5	O5	-	Typeable
875484	2018-09-06	Peru	Fluid	ST17	no	no	SAMN54589136	ybt 15; ICEKp11	231	-	0	-	0	-	0	-	0	-	-	KPC-2	CTX-M-12	rmtG	-	-	-	-	-	-	sul2	-	-	dfrA26	TEM-1D.v1^	-	SHV-11^	35Q	-	MgrB-60%	-	KL25	K25	!	Typeable	99.65%	-	O5	O5	-	Typeable
875418	2018-07-01	Peru	Urine	ST45	no	no	SAMN54589129	ybt 10; ICEKp4	78	-	0	-	0	-	0	-	0	-	-	NDM-1	CTX-M-15;TEM-26^	aac(3)-IIa.v1*;aac(6')-Ib-cr.v2;aadA2^;aph3-Ia.v1^	-	-	qnrB19^;qnrE2	Mrx;mphA	catA1^	arr-3	sul1	tet(A).v1	-	dfrA12	OXA-1	-	SHV-1	-	-	-	-	KL62	K62	-	Typeable	99.97%	-	O1/O2v1	O2a	-	Typeable
875628	2018-07-21	Peru	Device	ST45	no	no	SAMN54589150	ybt 10; ICEKp4	78	-	0	-	0	-	0	-	0	-	-	NDM-1	CTX-M-15;TEM-26^	aac(3)-IIa.v1*;aac(6')-Ib-cr.v2;aadA2^;aph3-Ia.v1^	-	-	qnrB19^;qnrE2	Mrx;mphA	catA1^	arr-3	sul1	tet(A).v1	-	dfrA12	OXA-1	-	SHV-1	-	-	-	-	KL62	K62	-	Typeable	99.97%	-	O1/O2v1	O2a	-	Typeable
875636	2018-07-21	Peru	Device	ST45	no	no	SAMN54589151	ybt 10; ICEKp4	78	-	0	-	0	-	0	-	0	-	-	NDM-1	CTX-M-15;TEM-26^	aac(3)-IIa.v1*;aac(6')-Ib-cr.v2;aadA2^;aph3-Ia.v1^	-	-	qnrE2	Mrx;mphA	catA1^	arr-3	sul1	tet(A).v1	-	dfrA12	OXA-1	-	SHV-1	-	-	-	-	KL62	K62	-	Typeable	99.97%	-	O1/O2v1	O2a	-	Typeable
876996	2019-04-12	Peru	Wound	ST219	no	no	SAMN54589281	-	0	-	0	-	0	-	0	-	0	-	-	-	CTX-M-15	aadA2^;strA.v1*;strB.v1*	-	-	qnrS1	Mrx;mphA	-	-	sul1;sul2	tet(A).v1	-	dfrA12	-	-	SHV-1^	-	-	-	-	KL114	unknown (KL114)	-	Typeable	99.85%	-	O1/O2v1	O1ab	-	Typeable
875708	2018-09-28	Peru	Blood	ST45	no	no	SAMN54589158	ybt 10; ICEKp4	78	-	0	-	0	-	0	-	0	-	-	NDM-1	CTX-M-15;TEM-26^	aac(3)-IIa.v1*;aac(6')-Ib-cr.v2;aadA2^;aph3-Ia.v1^	-	-	qnrB19^;qnrE2	Mrx;mphA	catA1^	arr-3	sul1	tet(A).v1	-	dfrA12	OXA-1	-	SHV-1	-	-	-	-	KL62	K62	-	Typeable	99.97%	-	O1/O2v1	O2a	-	Typeable
875774	2018-10-22	Peru	Urine	ST45	no	no	SAMN54589165	ybt 10; ICEKp4	78	-	0	-	0	-	0	-	0	-	-	NDM-1	CTX-M-15;TEM-26^	aac(3)-IIa.v1*;aac(6')-Ib-cr.v2;aadA2^;aph3-Ia.v1^	-	-	qnrB19^;qnrE2	Mrx;mphA	catA1^	arr-3	sul1	tet(A).v1	-	dfrA12	OXA-1	-	SHV-1	-	-	-	-	KL62	K62	-	Typeable	99.97%	-	O1/O2v1	O2a	-	Typeable
876794	2018-02-15	Peru	Wound	ST184	no	no	SAMN54589262	-	0	-	0	-	0	-	0	-	0	-	-	-	CTX-M-15	aac(3)-IIa.v1^;aac(6')-Ib-cr.v2;strA.v1^;strB.v1	-	-	qnrB1.v2^	-	-	-	sul2	-	-	dfrA14.v2*	OXA-1;TEM-1D.v1^	-	SHV-27	156D	-	-	-	KL62	K62	?4	Typeable	99.65%	-	O1/O2v2	O1ab	-	Typeable
875782	2018-10-30	Peru	Urine	ST45	no	no	SAMN54589166	ybt 10; ICEKp4	78	-	0	-	0	-	0	-	0	-	-	NDM-1	CTX-M-15;TEM-26^	aac(3)-IIa.v1*;aac(6')-Ib-cr.v2;aadA2^;aph3-Ia.v1^	-	-	qnrB19^;qnrE2	Mrx;mphA	catA1^	arr-3	sul1	tet(A).v1	-	dfrA12	OXA-1	-	SHV-1	-	-	-	-	KL62	K62	-	Typeable	99.97%	-	O1/O2v1	O2a	-	Typeable
877012	2019-05-16	Peru	Wound	ST297	no	no	SAMN54589283	-	0	-	0	-	0	-	0	-	0	-	-	-	-	strA.v1;strB.v1	-	-	-	-	-	-	-	-	-	-	-	-	SHV-220	-	-	-	-	KL158	unknown (KL158)	-	Typeable	99.93%	-	O1/O2v1	O1ab	-	Typeable
875968	2019-01-22	Peru	Urine	ST307	no	no	SAMN54589184	-	0	-	0	-	0	-	0	-	0	-	-	-	CTX-M-15	strA.v1^;strB.v1	-	-	qnrB19^	-	-	-	sul2	-	-	dfrA14.v2*	-	-	SHV-28^	-	-	-	GyrA-83I;ParC-80I	KL102	unknown (KL102)	-	Typeable	99.66%	-	O1/O2v2	O2afg	!	Typeable
875258	2018-02-13	Peru	Blood	ST45	no	no	SAMN54589114	ybt 10; ICEKp4	78	-	0	-	0	-	0	-	0	-	-	NDM-1	CTX-M-15;TEM-26	aac(3)-IIa.v1*;aac(6')-Ib-cr.v2;aadA2^;aph3-Ia.v1^	-	-	qnrB19^;qnrE2	Mrx;mphA	catA1^	arr-3	sul1	tet(A).v1	-	dfrA12	OXA-1	-	SHV-1	-	-	-	-	KL62	K62	-	Typeable	99.97%	-	O1/O2v1	O2a	-	Typeable
875400	2018-06-27	Peru	Blood	ST45	no	no	SAMN54589128	ybt 10; ICEKp4	78	-	0	-	0	-	0	-	0	-	-	NDM-1	CTX-M-15;TEM-17^	aac(3)-IIa.v1*;aac(6')-Ib-cr.v2;aadA2^	-	-	qnrB19^;qnrE2	Mrx;mphA	catA1^	arr-3	sul1	tet(A).v1	-	dfrA12	OXA-1	-	SHV-1	-	-	-	-	KL62	K62	-	Typeable	99.97%	-	O1/O2v1	O2a	-	Typeable
875716	2018-09-15	Peru	Respiratory	ST45	no	no	SAMN54589159	ybt 10; ICEKp4	78	-	0	-	0	-	0	-	0	-	-	NDM-1	CTX-M-15;TEM-17^	aac(3)-IIa.v1*;aac(6')-Ib-cr.v2;aadA2^;aph3-Ia.v1^	-	-	qnrB19^;qnrE2	Mrx;mphA	catA1^	arr-3	sul1	tet(A).v1	-	dfrA12	OXA-1	-	SHV-1	-	-	-	-	KL62	K62	-	Typeable	99.97%	-	O1/O2v1	O2a	-	Typeable
875442	2018-07-12	Peru	Urine	ST2031	no	no	SAMN54589132	-	0	-	0	-	0	-	0	-	0	-	-	-	CTX-M-27	aac(3)-IV;aac(6')-Ib-cr.v2;aadA16*;aadA2;aadA^;aph(4)-Ia;aph3-Ia.v1^;armA	-	-	qnrB4	Mrx;mphA;mphE.v2;msrE	catB3.v2;cmlA1*;floR.v1*	arr-3	sul1;sul3	tet(D)	-	dfrA27	OXA-1	-	SHV-11	35Q	OmpK35-38%	-	GyrA-83I;ParC-80I	KL102	unknown (KL102)	-	Typeable	99.64%	-	O1/O2v2	O1ab	-	Typeable
875610	2018-07-19	Peru	Urine	ST2031	no	no	SAMN54589149	-	0	-	0	-	0	-	0	-	0	-	-	-	CTX-M-27	aac(3)-IV;aac(6')-Ib-cr.v2;aadA16*;aadA2;aadA^;aph(4)-Ia;aph3-Ia.v1^;armA	-	-	qnrB4	Mrx;mphA;mphE.v2;msrE	catB3.v2;cmlA1*;floR.v1*	arr-3	sul1;sul3	tet(D)	-	dfrA27	OXA-1	-	SHV-11	35Q	OmpK35-38%	-	GyrA-83I;ParC-80I	KL102	unknown (KL102)	-	Typeable	99.64%	-	O1/O2v2	O1ab	-	Typeable
876920	2019-04-02	Peru	Wound	ST323	no	no	SAMN54589275	-	0	-	0	-	0	-	0	-	0	-	-	-	CTX-M-15	aac(3)-IIa.v1^;aac(6')-Ib-cr.v2;strA.v1^;strB.v1	-	-	qnrB1.v2^	-	-	-	sul2	tet(A).v1	-	dfrA14.v2*	OXA-1;TEM-1D.v1^	-	SHV-1^	-	-	-	-	KL21	K21	?3	Typeable	100.00%	-	O3b	O3b	?4	Typeable
877096	2019-04-27	Peru	Urine	ST340	no	no	SAMN54589291	-	0	-	0	-	0	-	0	-	0	-	-	NDM-1	CTX-M-15	aac(3)-IIa.v1;aac(6')-Ian;aadA*;strA.v1^;strB.v1	-	-	qnrB19^;qnrE2	-	catA1^;catB3.v2	arr-3	sul1;sul2	-	-	dfrA14.v2*	OXA-1;OXA-9.v1;SCO-1*;TEM-1D.v1^	-	SHV-11	35Q	-	-	GyrA-83I;ParC-80I	KL15	K15	-	Typeable	99.94%	-	O4	O4	-	Typeable
877100	2019-10-18	Peru	Blood	ST340	no	no	SAMN54589292	-	0	-	0	-	0	-	0	-	0	-	-	NDM-1	CTX-M-15	aac(3)-IIa.v1;aac(6')-Ian;aadA*;rmtG^;strA.v1^;strB.v1	-	-	qnrB19^;qnrE2	-	catA1^;catB3.v2	arr-3	sul1;sul2	-	-	dfrA14.v2*	OXA-1;OXA-9.v1;SCO-1*	-	SHV-11	35Q	-	-	GyrA-83I;ParC-80I	KL15	K15	-	Typeable	99.94%	-	O4	O4	-	Typeable
875950	2019-01-14	Peru	Urine	ST348	no	no	SAMN54589183	ybt 22; ICEKp12 (truncated)	13-2LV	-	0	-	0	-	0	-	0	-	-	-	CTX-M-15	aac(3)-IIa.v1^;aac(6')-Ib-cr.v2;strA.v1^;strB.v1	-	-	qnrB1.v2^	-	-	-	sul2	tet(A).v1	-	dfrA14.v2*	OXA-1;TEM-1D.v1^	-	SHV-11^	35Q	-	-	GyrA-87Y	KL62	K62	-	Typeable	99.94%	-	O1/O2v1	O1ab	!	Typeable
876946	2019-04-03	Peru	Wound	ST348	no	no	SAMN54589277	ybt 22; ICEKp12	13-1LV	-	0	-	0	-	0	-	0	-	-	-	CTX-M-15	aac(3)-IIa.v1^;aac(6')-Ib-cr.v2;strA.v1^;strB.v1	-	-	qnrB1.v2^	-	-	-	sul2	tet(A).v1	-	dfrA14.v2*	OXA-1;TEM-1D.v1^	-	SHV-11^	35Q	-	-	-	KL62	K62	-	Typeable	99.93%	-	O1/O2v1	O1ab	-	Typeable
875724	2018-09-10	Peru	Respiratory	ST219	no	no	SAMN54589160	-	0	-	0	-	0	-	0	-	0	-	-	KPC-2	CTX-M-15	aadA2^;strA.v1*;strB.v1*	-	-	qnrS1	Mrx;mphA	catII.2*	-	sul1;sul2	tet(A).v1	-	dfrA12	-	-	SHV-1^	-	OmpK36-84%	MgrB-0%	-	KL114	unknown (KL114)	-	Typeable	99.85%	-	O1/O2v1	O1ab	-	Typeable
876954	2019-04-03	Peru	Wound	ST348	no	no	SAMN54589278	ybt 22; ICEKp12	13-1LV	-	0	-	0	-	0	-	0	-	-	-	CTX-M-15	aac(3)-IIa.v1^;aac(6')-Ib-cr.v2;strA.v1^;strB.v1	-	-	qnrB1.v2^	-	-	-	sul2	tet(A).v1	-	dfrA14.v2*	OXA-1;TEM-1D.v1^	-	SHV-11^	35Q	-	-	-	KL62	K62	-	Typeable	99.93%	-	O1/O2v1	O1ab	-	Typeable
876840	2018-08-20	Peru	Wound	ST219-1LV	no	no	SAMN54589267	-	0	-	0	-	0	-	0	-	0	-	-	-	CTX-M-15	aac(3)-IIa.v1^;strA.v1^;strB.v1	-	-	qnrB17*	-	-	arr-3	sul1;sul2	tet(A).v1*	-	dfrA14.v2*;dfrA27	OXA-1	-	SHV-1^	-	-	-	-	KL121	unknown (KL121)	-	Typeable	99.99%	-	O1/O2v1	O1ab	-	Typeable
875766	2018-10-14	Peru	Blood	ST45	no	no	SAMN54589164	ybt 10; ICEKp4	78	-	0	-	0	-	0	-	0	-	-	NDM-1	CTX-M-15;TEM-17	aac(3)-IIa.v1*;aac(6')-Ib-cr.v2;aadA2^;aph3-Ia.v1^	-	-	qnrB19^;qnrE2	Mrx;mphA	catA1^	arr-3	sul1	tet(A).v1	-	dfrA12	OXA-1	-	SHV-1	-	-	-	-	KL62	K62	-	Typeable	99.97%	-	O1/O2v1	O2a	-	Typeable
877004	2019-04-16	Peru	Wound	ST37	no	no	SAMN54589282	-	0	-	0	-	0	-	0	-	0	-	-	-	CTX-M-15	aac(3)-IIa.v1^;aac(6')-Ib-cr.v2;strA.v1^;strB.v1	-	-	qnrB1.v2^	-	-	-	sul2	tet(A).v1	-	dfrA14.v2*	OXA-1;TEM-1D.v1^	-	SHV-11^	35Q	-	-	-	KL12	K12	?3	Typeable	99.95%	-	OL103	unknown (OL103)	?2	Typeable
877038	2019-05-23	Peru	Wound	ST37	no	no	SAMN54589285	-	0	-	0	-	0	-	0	-	0	-	-	-	CTX-M-15	aac(3)-IIa.v1^;aac(6')-Ib-cr.v2;aadA16*;strA.v1^;strB.v1	-	-	qnrB66*	-	-	arr-3	sul1;sul2	tet(A).v1?	-	dfrA14.v2*;dfrA27	OXA-1	-	SHV-11^	35Q	-	-	-	KL15	K15	-	Typeable	99.84%	-	O4	O4	-	Typeable
875370	2018-06-11	Peru	Respiratory	ST45	no	no	SAMN54589125	ybt 10; ICEKp4	78	-	0	-	0	-	0	-	0	-	-	NDM-1	CTX-M-15;TEM-12^	aac(3)-IIa.v1*;aac(6')-Ib-cr.v2;aadA2^;aph3-Ia.v1^	-	-	qnrB19^;qnrE2	Mrx;mphA	catA1^	arr-3	sul1	tet(A).v1	-	dfrA12	OXA-1	-	SHV-1	-	-	-	-	KL62	K62	-	Typeable	99.97%	-	O1/O2v1	O2a	-	Typeable
875694	2018-10-01	Peru	Urine	ST45	no	no	SAMN54589157	ybt 10; ICEKp4	78	-	0	-	0	-	0	-	0	-	-	NDM-1	CTX-M-15;TEM-12^	aac(3)-IIa.v1*;aac(6')-Ib-cr.v2;aadA2^;aph3-Ia.v1^	-	-	qnrB19^;qnrE2	Mrx;mphA	catA1^	arr-3	sul1	tet(A).v1	-	dfrA12	OXA-1	-	SHV-1	-	-	-	-	KL62	K62	-	Typeable	99.97%	-	O1/O2v1	O2a	-	Typeable
875354	2018-05-24	Peru	Urine	ST45	no	no	SAMN54589123	ybt 10; ICEKp4	80	-	0	-	0	-	0	-	0	-	-	NDM-1	CTX-M-15;TEM-12	aac(3)-IIa.v1*;aac(6')-Ib-cr.v2;strA.v1^;strB.v1	-	-	qnrE2;qnrS1	ermB.v1*	catA1^;catB3.v2	arr-3	sul1;sul2	tet(A).v1	-	dfrA14.v2*	OXA-1	-	SHV-1	-	-	-	-	KL52	K52	?3	Typeable	99.95%	-	OL13	O13	?3!	Typeable
875434	2018-07-05	Peru	Blood	ST45	no	no	SAMN54589131	ybt 10; ICEKp4	78	-	0	-	0	-	0	-	0	-	-	NDM-1	CTX-M-15;TEM-12	aac(3)-IIa.v1*;aac(6')-Ib-cr.v2;aadA2^	-	-	qnrB19^;qnrE2	Mrx;mphA	catA1^	arr-3	sul1	tet(A).v1	-	dfrA12	OXA-1	-	SHV-1	-	-	-	-	KL62	K62	-	Typeable	99.97%	-	O1/O2v1	O2a	-	Typeable
875660	2018-08-31	Peru	Respiratory	ST45	no	no	SAMN54589154	ybt 10; ICEKp4	78	-	0	-	0	-	0	-	0	-	-	NDM-1	CTX-M-15;TEM-12	aac(3)-IIa.v1*;aac(6')-Ib-cr.v2;aadA2^;aph3-Ia.v1^	-	-	qnrB19^;qnrE2	Mrx;mphA	catA1^	arr-3	sul1	tet(A).v1	-	dfrA12	OXA-1	-	SHV-1	-	-	-	-	KL62	K62	-	Typeable	99.97%	-	O1/O2v1	O2a	-	Typeable
875450	2018-07-13	Peru	Wound	ST45	no	no	SAMN54589133	ybt 10; ICEKp4	78	-	0	-	0	-	0	-	0	-	-	NDM-1	CTX-M-15	aac(3)-IIa.v1*;aac(6')-Ib-cr.v2;aadA2^	-	-	qnrB19^;qnrE2	Mrx;mphA	catA1^	arr-3	sul1	tet(A).v1	-	dfrA12	OXA-1;TEM-1D.v1^	-	SHV-1	-	-	-	-	KL62	K62	-	Typeable	99.97%	-	O1/O2v1	O2a	-	Typeable
875652	2018-08-27	Peru	Blood	ST307	no	no	SAMN54589153	-	0	-	0	-	0	-	0	-	0	-	-	IMP-74	CTX-M-15	aac(6')-IIc;aac(6')-Ib-cr.v2;strA.v1^;strB.v1	-	-	qnrB1.v2^	-	-	-	sul1;sul2	tet(A).v1	-	dfrA14.v2*	OXA-1;OXA-2;TEM-1D.v1^	-	SHV-28^	-	-	MgrB-11%	GyrA-83I;ParC-80I	KL102	unknown (KL102)	-	Typeable	99.66%	-	O1/O2v2	O2afg	-	Typeable
876786	2018-01-25	Peru	Wound	ST307	no	no	SAMN54589261	-	0	-	0	-	0	-	0	-	0	-	-	-	CTX-M-15	aac(3)-IIa.v1^;aac(6')-Ib-cr.v2;aadA^;aph(3')-IIa;rmtG^;sph.v1;strA.v1^;strB.v1	-	-	qnrB1.v2^	mphB.v1	-	-	sul1;sul2	tet(A).v1;tet(B).v2*;tetR	-	dfrA14.v2*	OXA-1;TEM-1D.v1^	-	SHV-28^	-	OmpK35-48%	-	GyrA-83I;ParC-80I	KL102	unknown (KL102)	-	Typeable	99.64%	-	O1/O2v2	O2afg	-	Typeable
876824	2018-05-19	Peru	Wound	ST340	no	no	SAMN54589265	-	0	-	0	-	0	-	0	-	0	-	-	-	CTX-M-15	aac(3)-IIa.v1;aac(6')-Ian;aadA*;rmtG^;strA.v1^;strB.v1	-	-	qnrB19^	-	-	-	sul2	-	-	dfrA14.v2*	OXA-9.v1;SCO-1*	-	SHV-11	35Q	-	-	GyrA-83I;ParC-80I	KL15	K15	-	Typeable	99.94%	-	O4	O4	-	Typeable
875644	2018-08-14	Peru	Urine	ST45	no	no	SAMN54589152	ybt 10; ICEKp4	78-1LV	-	0	-	0	-	0	-	0	-	-	NDM-1	CTX-M-15	aac(3)-IIa.v1*;aac(6')-Ib-cr.v2;aadA2^;aph3-Ia.v1^	-	-	qnrB19^;qnrE2	Mrx;mphA	catA1^	-	sul1	tet(A).v1	-	dfrA12	OXA-1;TEM-1D.v1^	-	SHV-1	-	-	-	-	KL62	K62	-	Typeable	99.97%	-	O1/O2v1	O2a	-	Typeable
875346	2018-05-10	Peru	Respiratory	ST584	no	no	SAMN54589122	-	0	-	0	-	0	-	0	-	0	-	-	NDM-1	TEM-26^	aac(3)-IIa.v1*;aac(6')-Ib-cr.v2	-	-	qnrE2	-	catB3.v2	arr-3	sul1	-	-	-	OXA-1	-	SHV-168^	146V	-	-	-	KL38	K38	-	Typeable	99.96%	-	O3b	O3b	-	Typeable
877070	2019-08-21	Peru	Wound	ST39	no	no	SAMN54589289	-	0	-	0	-	0	-	0	-	0	-	-	-	CTX-M-15	aac(3)-IIa.v1^;aac(6')-Ib-cr.v2;strA.v1^;strB.v1	-	-	qnrB1.v2^	-	-	-	sul2	tet(A).v1	-	dfrA14.v2*	OXA-1;TEM-1D.v1^	-	SHV-11^	35Q	-	-	-	KL149	unknown (KL149)	-	Typeable	99.32%	-	O1/O2v2	O1ab	-	Typeable
875514	2018-10-03	Peru	Fluid	ST39	no	no	SAMN54589139	-	0	-	0	-	0	-	0	-	0	-	-	KPC-2	CTX-M-15	aac(3)-IIa.v1^;aac(6')-Ib-cr.v2;strA.v1^;strB.v1	-	-	qnrB1.v2^	-	-	-	sul2	tet(A).v1	-	dfrA14.v2*	OXA-1	-	SHV-11^	35Q	-	-	-	KL149	unknown (KL149)	-	Typeable	99.32%	-	O1/O2v2	O1ab	-	Typeable
875564	2018-10-12	Peru	Fluid	ST39	no	no	SAMN54589144	-	0	-	0	-	0	-	0	-	0	-	-	KPC-2	CTX-M-15	aac(3)-IIa.v1^;aac(6')-Ib-cr.v2;strA.v1^;strB.v1	-	-	qnrB1.v2^	-	-	-	sul2	tet(A).v1	-	dfrA14.v2*	OXA-1	-	SHV-11^	35Q	-	-	-	KL149	unknown (KL149)	-	Typeable	99.32%	-	O1/O2v2	O1ab	-	Typeable
876744	2017-11-29	Peru	Wound	ST307	no	no	SAMN54589257	-	0	-	0	-	0	-	0	-	0	-	-	-	CTX-M-15	aac(3)-IIa.v1^;aac(6')-Ib-cr.v2;aadA2^;strA.v1^;strB.v1	-	-	qnrB1.v2^;qnrE2	Mrx;mphA	catA1^	-	sul1^;sul2	tet(A).v1	-	dfrA12;dfrA14.v2*	OXA-1;TEM-1D.v1^	-	SHV-1^	-	-	-	GyrA-83I;ParC-80I	KL102	unknown (KL102)	-	Typeable	99.66%	-	O1/O2v2	O2afg	-	Typeable
876760	2017-12-11	Peru	Abscess	ST348	no	no	SAMN54589259	ybt 14; ICEKp5	355-2LV	-	0	-	0	-	0	-	0	-	-	-	CTX-M-15	aac(3)-IIa.v1^;aac(6')-Ib-cr.v2;strA.v1^;strB.v1	-	-	qnrB1.v2^	-	-	-	sul2	tet(A).v1	-	dfrA14.v2*	OXA-1;TEM-1D.v1^	-	SHV-11^	35Q	-	-	-	KL62	K62	-	Typeable	99.93%	-	O1/O2v1	O1ab	-	Typeable
875186	2017-11-16	Peru	Urine	ST25	no	no	SAMN54589108	ybt 9; ICEKp3	183-1LV	-	0	-	0	-	0	-	0	-	-	OXA-181	CTX-M-15	aac(6')-Ib-cr.v2*;strA.v1^;strB.v1	-	-	qnrB1.v2^;qnrS1	-	-	-	sul2	tet(A).v1	-	dfrA14.v2*	OXA-1;TEM-1D.v1^	-	SHV-11^	35Q	OmpK36-11%	-	-	KL2	K2	-	Typeable	99.56%	-	O1/O2v2	O1ab	-	Typeable
875208	2017-11-29	Peru	Device	ST25	no	no	SAMN54589110	ybt 9; ICEKp3	183-1LV	-	0	-	0	-	0	-	0	-	-	OXA-181	CTX-M-15	aac(6')-Ib-cr.v2*;strA.v1^;strB.v1	-	-	qnrB1.v2^;qnrS1	-	-	-	sul2	tet(A).v1	-	dfrA14.v2*	OXA-1;TEM-1D.v1^	-	SHV-11^	35Q	OmpK36-11%	-	-	KL2	K2	-	Typeable	99.56%	-	O1/O2v2	O1ab	-	Typeable
875194	2017-11-16	Peru	Blood	ST45	no	no	SAMN54589109	ybt 10; ICEKp4	78	-	0	-	0	-	0	-	0	-	-	-	CTX-M-15	aac(6')-Ib-cr.v2;aadA2^;aph3-Ia.v1^	-	-	-	Mrx;mphA	-	-	sul1	tet(A).v1	-	dfrA12	OXA-1;TEM-1D.v1^	-	SHV-1	-	-	-	-	KL62	K62	-	Typeable	99.97%	-	O1/O2v1	O2a	-!	Typeable
876736	2017-10-06	Peru	Wound	ST462	no	no	SAMN54589256	-	0	-	0	-	0	-	0	-	0	-	-	-	CTX-M-55	aac(3)-IIa.v1^;aac(6')-Ib-cr.v2;aph(3')-IIa;strA.v1^;strB.v1	-	fosA3	qnrB1.v2^	-	-	-	sul2	tet(A).v1	-	dfrA14.v2*	OXA-1	-	SHV-11^	35Q	-	-	-	KL149	unknown (KL149)	-	Typeable	99.90%	-	O4	O4	-	Typeable
875110	2017-01-26	Peru	Urine	ST485	no	no	SAMN54589101	-	0	-	0	-	0	-	0	-	0	-	-	KPC-2	-	aac(3)-IId^;aac(6')-Ian;aac(6')-Ib-cr.v2^;strB.v1*	-	-	-	Mrx;mphA	catB3.v2	-	sul1;sul2	-	-	-	OXA-1;TEM-1D.v1^	SHV-52	-	35Q;69I	-	-	-	KL25	K25	!	Typeable	99.65%	-	O5	O5	-	Typeable
875144	2017-05-30	Peru	Blood	ST556	no	no	SAMN54589104	-	0	-	0	-	0	-	0	-	0	-	-	KPC-2	CTX-M-15	aadA2^;aph3-Ia.v1^	-	-	-	Mrx;mphA	-	-	sul1	tet(A).v1	-	dfrA12	-	-	SHV-11^	35Q	-	-	-	KL62	K62	-	Typeable	99.93%	-	O1/O2v1	O2a	-	Typeable
877088	2019-09-13	Peru	Wound	ST70	no	no	SAMN54589290	-	0	-	0	-	0	-	0	-	0	-	-	-	CTX-M-15	aac(3)-IIa.v1^;aac(6')-Ib-cr.v2;strA.v1^;strB.v1	-	-	qnrB1.v2^	-	-	-	sul2	-	-	dfrA14.v2*	OXA-1	-	SHV-32	156D	-	-	-	KL62	K62	?2	Typeable	99.78%	-	O1/O2v1	O1ab	-	Typeable
876728	2017-10-12	Peru	Wound	ST629	no	no	SAMN54589255	-	0	-	0	-	0	-	0	-	0	-	-	-	CTX-M-15	aac(3)-IIa.v1^;aac(6')-Ib-cr.v2;strA.v1^;strB.v1	-	-	qnrB1.v2^	-	-	arr-3	sul1;sul2	tet(A).v1	-	dfrA14.v2*	OXA-1;TEM-1D.v1^	-	SHV-11^	35Q	-	-	GyrA-83I;ParC-80I	KL10	K10	?3	Typeable	99.13%	-	O3/O3a	O3/O3a	?4	Typeable
875888	2018-12-12	Peru	Device	ST629	no	no	SAMN54589176	-	0	-	0	-	0	-	0	-	0	-	-	KPC-2	CTX-M-3-like	aac(6')-Ib-cr.v2;rmtG;strA.v1^;strB.v1	-	-	qnrB1.v2^	-	-	-	sul2	tet(A).v1	-	dfrA14.v2*	OXA-1;TEM-1D.v1^	-	SHV-11^	35Q	-	-	GyrA-83I;ParC-80I	KL10	K10	?3	Typeable	99.13%	-	O3/O3a	O3/O3a	?4	Typeable
876866	2018-09-12	Peru	Wound	ST70	no	no	SAMN54589269	-	0	-	0	-	0	-	0	-	0	-	-	-	CTX-M-15	aac(3)-IIa.v1^;aac(6')-Ib-cr.v2;strA.v1^;strB.v1	-	-	qnrB1.v2^	-	-	-	sul2	tet(A).v1	-	dfrA14.v2*	OXA-1	-	SHV-32	156D	-	-	-	KL62	K62	?3	Typeable	99.79%	-	O1/O2v1	O1ab	-	Typeable
876882	2018-11-10	Peru	Wound	ST70	no	no	SAMN54589271	-	0	-	0	-	0	-	0	-	0	-	-	-	CTX-M-15	aac(3)-IIa.v1^;aac(6')-Ib-cr.v2;strA.v1^;strB.v1	-	-	qnrB1.v2^	-	-	-	sul2	tet(A).v1	-	dfrA14.v2*	OXA-1	-	SHV-32	156D	-	-	-	KL62	K62	?2	Typeable	99.78%	-	O1/O2v1	O1ab	-	Typeable
876710	2017-08-19	Peru	Wound	ST70	no	no	SAMN54589254	-	0	-	0	-	0	-	0	-	0	-	-	-	CTX-M-15	aac(3)-IIa.v1^;aac(6')-Ib-cr.v2;strA.v1^;strB.v1	-	-	qnrB1.v2^	-	-	-	sul2	tet(A).v1	-	dfrA14.v2*	OXA-1	-	SHV-32	156D	-	-	-	KL62	K62	?3	Typeable	99.79%	-	O1/O2v1	O1ab	-	Typeable
876912	2019-02-13	Peru	Wound	ST995	no	no	SAMN54589274	-	0	-	0	-	0	-	0	-	0	-	-	-	CTX-M-15	aac(3)-IIa.v1^;aac(6')-Ib-cr.v2;strA.v1^;strB.v1	-	-	qnrB1.v2^	-	-	-	sul2	tet(A).v1	-	dfrA14.v2*	OXA-1;TEM-1D.v1^	-	-	-	-	-	-	KL117	unknown (KL117)	-	Typeable	99.85%	-	O1/O2v1	O1ab	-	Typeable
876858	2018-08-28	Peru	Wound	ST833	no	no	SAMN54589268	-	0	-	0	-	0	-	0	-	0	-	-	-	CTX-M-15	aac(3)-IIa.v1^;aac(6')-Ib-cr.v2;aadA2;aadA^;aph(4)-Ia;strA.v1^;strB.v1	-	-	qnrB1.v2^	-	cmlA1*;floR.v1	-	sul2;sul3	tet(A).v1?	-	dfrA14.v2*	OXA-1;TEM-1D.v1^	-	SHV-11	35Q	-	-	GyrA-83I;ParC-80I	KL52	K52	?3!	Typeable	99.91%	-	OL13	O13	?3!	Typeable
876042	2017-06-13	Peru (from Honduras)	Fluid	ST11	no	no	SAMN54589190	ybt 14; ICEKp5	376-1LV	-	0	-	0	-	0	-	0	-	-	NDM-1	CTX-M-15	aac(6')-Ib3^;aadA1.v1;aadA2^;aph3-Ia.v1^;rmtC;sat-2	-	-	qnrB1.v2^	Mrx;erm(42)*;mphA	catA1^	-	sul1;sul2	tet(D)	-	dfrA1.v1;dfrA12;dfrA14.v2*	CMY-4.v1;OXA-1;TEM-1D.v1^	-	SHV-11	35Q	OmpK35-7%	-	GyrA-83I;ParC-80I	KL141	unknown (KL141)	-	Typeable	99.66%	-	O4	O4	-	Typeable
876156	2017-12-16	Peru (from Honduras)	Tissue	ST11	no	no	SAMN54589200	ybt 14; ICEKp5	376-1LV	-	0	-	0	-	0	-	0	-	-	NDM-1	CTX-M-15	aadA1.v1;sat-2	-	-	qnrB1.v2^	erm(42)*	catA1^	-	sul1;sul2	tet(D)	-	dfrA1.v1;dfrA14.v2*	CMY-4.v1;OXA-1;TEM-1D.v1^	-	SHV-11	35Q	OmpK35-7%	-	GyrA-83I;ParC-80I	KL141	unknown (KL141)	-	Typeable	99.66%	-	O4	O4	-	Typeable
876332	2018-04-25	Peru (from Honduras)	Tissue	ST11	no	no	SAMN54589218	ybt 14; ICEKp5	376-1LV	-	0	-	0	-	0	-	0	-	-	KPC-2;NDM-1	CTX-M-15	aac(6')-Ib-cr5*;aadA1.v1;sat-2	-	-	qnrB1.v2^	erm(42)*	catA1^	-	sul1;sul2	tet(D)	-	dfrA1.v1;dfrA14.v2*	CMY-4.v1;OXA-1	-	SHV-11	35Q	OmpK35-7%	-	GyrA-83I;ParC-80I	KL141	unknown (KL141)	-	Typeable	99.66%	-	O4	O4	-	Typeable
876496	2018-07-16	Peru (from Honduras)	Blood	ST107	no	no	SAMN54589233	-	0	-	0	-	0	-	0	-	0	-	-	NDM-1	CTX-M-15	aac(3)-IId^;aac(6')-Ib-cr.v2;aph(3')-VI;armA;strA.v1*;strB.v1*	-	-	-	mphE.v2^;msrE	catA1^	-	sul1;sul2	tet(D)	-	dfrA12;dfrA14.v2*	OXA-1;TEM-1D.v1^	-	SHV-1^	-	OmpK36-0%	-	-	KL103	unknown (KL103)	-	Typeable	98.94%	-	O1/O2v1	O1ab	-	Typeable
876526	2018-07-24	Peru (from Honduras)	Blood	ST107	no	no	SAMN54589236	-	0	-	0	-	0	-	0	-	0	-	-	NDM-1	CTX-M-15	aac(3)-IId^;aac(6')-Ib-cr.v2;aph(3')-VI;armA;strA.v1*;strB.v1*	-	-	-	mphE.v2^;msrE	catA1^	-	sul1;sul2	tet(D)	-	dfrA12;dfrA14.v2*	OXA-1;TEM-1D.v1^	-	SHV-1^	-	-	-	-	KL103	unknown (KL103)	-	Typeable	98.94%	-	O1/O2v1	O1ab	-	Typeable
876534	2018-07-22	Peru (from Honduras)	Blood	ST107	no	no	SAMN54589237	-	0	-	0	-	0	-	0	-	0	-	-	NDM-1	CTX-M-15	aac(3)-IId^;aac(6')-Ib-cr.v2;aph(3')-VI;armA;strA.v1*;strB.v1*	-	-	-	mphE.v2^;msrE	catA1^	-	sul1;sul2	tet(D)	-	dfrA12;dfrA14.v2*	OXA-1;TEM-1D.v1^	-	SHV-1^	-	-	-	-	KL103	unknown (KL103)	-	Typeable	98.94%	-	O1/O2v1	O1ab	-	Typeable
876622	2018-09-21	Peru (from Honduras)	Blood	ST107	no	no	SAMN54589246	-	0	-	0	-	0	-	0	-	0	-	-	NDM-1	CTX-M-15	aac(3)-IId^;aac(6')-Ib-cr.v2;aph(3')-VI;armA;strA.v1*;strB.v1*	-	-	-	mphE.v2^;msrE	catA1^	-	sul1;sul2	tet(D)	-	dfrA12;dfrA14.v2*	OXA-1;TEM-1D.v1^	-	SHV-1^	-	-	-	-	KL103	unknown (KL103)	-	Typeable	98.94%	-	O1/O2v1	O1ab	-!	Typeable
876542	2018-08-09	Peru (from Honduras)	Fluid	ST107	no	no	SAMN54589238	-	0	-	0	-	0	-	0	-	0	-	-	NDM-1	-	aac(6')-Ib-cr.v2;aph(3')-VI;armA;strA.v1*;strB.v1*	-	-	-	mphE.v2^;msrE	-	-	sul1;sul2	-	-	dfrA12;dfrA14.v2*	OXA-1	-	SHV-1^	-	-	-	-	KL103	unknown (KL103)	-	Typeable	98.94%	-	O1/O2v1	O1ab	-	Typeable
876278	2018-03-31	Peru (from Honduras)	Blood	ST11	no	no	SAMN54589212	ybt 14; ICEKp5	376-1LV	-	0	-	0	-	0	-	0	-	-	NDM-1	CTX-M-15	aac(6')-Ib3^;aadA1.v1;aadA2^;aph3-Ia.v1^;rmtC;sat-2	-	-	qnrB1.v2^	Mrx;erm(42)*;mphA	catA1^	-	sul1;sul2	tet(D)	-	dfrA1.v1;dfrA12;dfrA14.v2*	CMY-4.v1;OXA-1;TEM-1D.v1^	-	SHV-11	35Q	OmpK35-7%	-	GyrA-83I;ParC-80I	KL141	unknown (KL141)	-	Typeable	99.66%	-	O4	O4	-	Typeable
876084	2017-10-20	Peru (from Honduras)	Device	ST1109	no	no	SAMN54589194	-	0	-	0	-	0	-	0	-	0	-	-	NDM-1	CTX-M-15;TEM-52^	aac(3)-IIa.v1^;aac(6')-Ian;aac(6')-Ib3^;aadA1.v1^;rmtC;strA.v1;strB.v1	-	-	-	-	catA1^	-	sul1	-	-	dfrA1.v2	CMY-6	-	SHV-61	35Q	-	-	-	KL54	K54	-	Typeable	99.99%	-	O1/O2v2	O1ab	-	Typeable
876092	2017-10-15	Peru (from Honduras)	Abscess	ST14	no	no	SAMN54589195	-	0	-	0	-	0	-	0	-	0	-	-	NDM-1	CTX-M-15	aac(6')-Ib-cr5^;aadA1.v1^;rmtC	-	-	qnrB1.v2^	-	catA1^	-	sul1	tet(D)	-	dfrA1.v2;dfrA14.v2*	CMY-6;OXA-1	-	SHV-28^	-	-	-	-	KL16	K16	-	Typeable	99.73%	-	O1/O2v1	O1ab	-	Typeable
876286	2018-03-31	Peru (from Honduras)	Blood	ST11	no	no	SAMN54589213	ybt 14; ICEKp5	376-1LV	-	0	-	0	-	0	-	0	-	-	NDM-1	CTX-M-15	aac(6')-Ib3^;aadA1.v1;aadA2^;aph3-Ia.v1^;rmtC;sat-2	-	-	qnrB1.v2^	Mrx;erm(42)*;mphA	catA1^	-	sul1;sul2	tet(D)	-	dfrA1.v1;dfrA12;dfrA14.v2*	CMY-4.v1;OXA-1;TEM-1D.v1^	-	SHV-11	35Q	OmpK35-7%	-	GyrA-83I;ParC-80I	KL141	unknown (KL141)	-	Typeable	99.66%	-	O4	O4	-	Typeable
876294	2018-03-31	Peru (from Honduras)	Blood	ST11	no	no	SAMN54589214	ybt 14; ICEKp5	376-1LV	-	0	-	0	-	0	-	0	-	-	NDM-1	CTX-M-15	aac(6')-Ib3^;aadA1.v1;aadA2^;aph3-Ia.v1^;rmtC;sat-2	-	-	qnrB1.v2^	Mrx;erm(42)*;mphA	catA1^	-	sul1;sul2	tet(D)	-	dfrA1.v1;dfrA12;dfrA14.v2*	CMY-4.v1;OXA-1;TEM-1D.v1^	-	SHV-11	35Q	OmpK35-7%	-	GyrA-83I;ParC-80I	KL141	unknown (KL141)	-	Typeable	99.66%	-	O4	O4	-	Typeable
876308	2018-03-31	Peru (from Honduras)	Respiratory	ST11	no	no	SAMN54589215	ybt 14; ICEKp5	376-1LV	-	0	-	0	-	0	-	0	-	-	NDM-1	CTX-M-15	aac(6')-Ib3^;aadA1.v1;aadA2^;aph3-Ia.v1^;rmtC;sat-2	-	-	qnrB1.v2^	Mrx;erm(42)*;mphA	catA1^	-	sul1;sul2	tet(D)	-	dfrA1.v1;dfrA12;dfrA14.v2*	CMY-4.v1;OXA-1;TEM-1D.v1^	-	SHV-11	35Q	OmpK35-7%	-	GyrA-83I;ParC-80I	KL141	unknown (KL141)	-	Typeable	99.66%	-	O4	O4	-	Typeable
876500	2018-07-10	Peru (from Honduras)	Blood	ST11	no	no	SAMN54589234	ybt 14; ICEKp5	376-1LV	-	0	-	0	-	0	-	0	-	-	NDM-1	CTX-M-15	aac(6')-Ib-cr5^;aadA1.v1;aadA2^;aph3-Ia.v1^;sat-2	-	-	qnrB1.v2^	Mrx;erm(42)*;mphA	catA1^	-	sul1;sul2	tet(D)	-	dfrA1.v1;dfrA12;dfrA14.v2*	CMY-4.v1;OXA-1;TEM-1D.v1^	-	SHV-11	35Q	OmpK35-7%	-	GyrA-83I;ParC-80I	KL141	unknown (KL141)	-	Typeable	99.66%	-	O4	O4	-	Typeable
876518	2018-07-10	Peru (from Honduras)	Blood	ST11	no	no	SAMN54589235	ybt 14; ICEKp5	376-1LV	-	0	-	0	-	0	-	0	-	-	NDM-1	CTX-M-15	aac(6')-Ib-cr5*;aadA1.v1;aadA2^;aph3-Ia.v1^;sat-2	-	-	qnrB1.v2^	Mrx;erm(42)*;mphA	catA1^	-	sul1;sul2	tet(D)	-	dfrA1.v1;dfrA12;dfrA14.v2*	CMY-4.v1;OXA-1;TEM-1D.v1^	-	SHV-11	35Q	OmpK35-7%	-	GyrA-83I;ParC-80I	KL141	unknown (KL141)	-	Typeable	99.66%	-	O4	O4	-	Typeable
876324	2018-04-22	Peru (from Honduras)	Urine	ST11	no	no	SAMN54589217	-	0	-	0	-	0	-	0	-	0	-	-	NDM-1	CTX-M-15	aac(3)-IIa.v1^;aac(6')-Ib3^;aadA1.v1;rmtC;sat-2;strA.v1^;strB.v1	-	-	qnrB1.v2^	Mrx;erm(42)*;mphA	catA1^	arr-3	sul1;sul2	tet(A).v1	-	dfrA1.v1;dfrA14.v2*	CMY-4.v1;OXA-1*;TEM-1D.v1^	-	SHV-11	35Q	OmpK35-40%	-	GyrA-83I;ParC-80I	KL15	K15	-	Typeable	99.92%	-	O4	O4	?2	Typeable
876446	2018-06-25	Peru (from Honduras)	Fluid	ST11	no	no	SAMN54589228	ybt 10; ICEKp4	26-1LV	-	0	-	0	-	0	-	0	-	-	-	CTX-M-15	aac(3)-IId^;aac(6')-Ib-cr.v2;aph3-Ia.v1^	-	-	qnrB1.v2^;qnrB4	Mrx;mphA	-	arr-3	sul1	tet(D)	-	dfrA14.v2*	DHA-1;OXA-1;TEM-1	-	SHV-11	35Q	-	-	GyrA-83I;ParC-80I	KL105	unknown (KL105)	-	Typeable	99.98%	-	O1/O2v2	O2afg	-	Typeable
876068	2017-09-04	Peru (from Honduras)	Fluid	ST147	no	no	SAMN54589192	-	0	-	0	-	0	-	0	-	0	-	-	NDM-1	-	aac(3)-IIa.v1^;aac(6')-Ib3^;aph3-Ia.v1^;rmtC;strA.v1;strB.v1	-	-	-	-	catA1*	-	sul1	tet(A).v1;tet(D)	-	dfrA1.v1	CMY-6;OXA-1;TEM-1D.v1^	-	SHV-11^	35Q	OmpK35-7%	-	GyrA-83I;ParC-80I	KL64	K64	-	Typeable	99.99%	-	O1/O2v1	O2a	-	Typeable
876592	2018-08-11	Peru (from Honduras)	Urine	ST111-1LV	no	no	SAMN54589243	ybt 14; ICEKp5	382-1LV	-	0	-	0	-	0	-	0	-	-	NDM-1	CTX-M-15	aac(3)-IId^;aac(6')-Ib-cr.v2;aph(3')-VI;armA;strA.v1*;strB.v1*	-	-	-	mphE.v2^;msrE	-	-	sul1;sul2	tet(A).v1;tet(D)	-	dfrA12;dfrA14.v2*	OXA-1;TEM-1D.v1^	-	SHV-11^	35Q	-	-	GyrA-83I	KL45	K45	-	Typeable	99.72%	-	O1/O2v2	O1ab	-	Typeable
876316	2018-04-17	Peru (from Honduras)	Blood	ST11-1LV	no	no	SAMN54589216	-	0	-	0	-	0	-	0	-	0	-	-	NDM-1	CTX-M-15	aac(6')-Ib-cr5^;aadA1.v1;aadA5;armA;sat-2;strA.v1;strB.v1	-	-	qnrB19^	erm(42)*;mphE.v2;msrE	catB3.v2	-	sul1;sul2	-	-	dfrA1.v1;dfrA17	CMY-4.v1;OXA-1	-	SHV-11^	35Q	-	-	GyrA-83I;ParC-80I	KL136	unknown (KL136)	-	Typeable	99.88%	-	O1/O2v2	O2afg	-	Typeable
876630	2018-09-12	Peru (from Honduras)	Fluid	ST147	no	no	SAMN54589247	ybt 9; ICEKp3	177	-	0	-	0	-	0	-	0	-	-	NDM-1	CTX-M-15	aac(6')-Ib3^;aadA5;rmtC	-	-	-	Mrx;ermB.v1*;mphA	-	-	sul1	tet(A).v1*	-	dfrA17	CMY-6	-	SHV-11^	35Q	OmpK35-17%;OmpK36GD	-	GyrA-83I;ParC-80I	KL64	K64	-	Typeable	100.00%	-	O1/O2v1	O2a	-	Typeable
876260	2018-03-30	Peru (from Honduras)	Wound	ST147	no	no	SAMN54589211	ybt 9; ICEKp3	177	-	0	-	0	-	0	-	0	-	-	NDM-1	CTX-M-15	aac(6')-Ib3*;aadA1.v1;aadA5;rmtB;sat-2;strA.v1	-	-	-	Mrx;erm(42)*;ermB.v1*;mphA	catII.2*	arr-3	sul2	tet(A).v1;tet(G).v1	-	dfrA1.v1;dfrA17;dfrA27	CMY-4.v1;TEM-1D.v1^	-	SHV-11^	35Q	OmpK35-17%	-	GyrA-83I;ParC-80I	KL64	K64	-	Typeable	100.00%	-	O1/O2v1	O2a	-	Typeable
876358	2018-05-18	Peru (from Honduras)	Respiratory	ST147	no	no	SAMN54589220	ybt 9; ICEKp3	177	-	0	-	0	-	0	-	0	-	-	NDM-1	CTX-M-15	aac(6')-Ib3^;aadA1.v1;aadA5;rmtC;sat-2	-	-	-	Mrx;erm(42)*;ermB.v1*;mphA	-	-	sul1;sul2	-	-	dfrA1.v1;dfrA17	CMY-4.v1;TEM-1D.v1^	-	SHV-11^	35Q	OmpK35-17%	-	GyrA-83I;ParC-80I	KL64	K64	-	Typeable	100.00%	-	O1/O2v1	O2a	-	Typeable
876550	2018-08-06	Peru (from Honduras)	Tissue	ST147	no	no	SAMN54589239	ybt 9; ICEKp3	177	-	0	-	0	-	0	-	0	-	-	NDM-1	CTX-M-15	aac(6')-Ib3^;rmtC;sat-2	-	-	-	Mrx;erm(42)*;ermB.v1*;mphA	-	-	sul1;sul2	-	-	dfrA1.v1;dfrA17	CMY-4.v1;TEM-1D.v1^	-	SHV-11^	35Q	OmpK35-17%	-	GyrA-83I;ParC-80I	KL64	K64	-	Typeable	100.00%	-	O1/O2v1	O2a	-	Typeable
876568	2018-08-06	Peru (from Honduras)	Tissue	ST147	no	no	SAMN54589240	ybt 9; ICEKp3	177	-	0	-	0	-	0	-	0	-	-	NDM-1	CTX-M-15	aac(6')-Ib3^;rmtC;sat-2	-	-	-	Mrx;erm(42)*;ermB.v1*;mphA	-	-	sul1;sul2	-	-	dfrA1.v1;dfrA17	CMY-4.v1;TEM-1D.v1^	-	SHV-11^	35Q	OmpK35-17%	-	GyrA-83I;ParC-80I	KL64	K64	-	Typeable	100.00%	-	O1/O2v1	O2a	-	Typeable
876584	2018-08-09	Peru (from Honduras)	Abscess	ST147	no	no	SAMN54589242	ybt 9; ICEKp3	177	-	0	-	0	-	0	-	0	-	-	NDM-1	CTX-M-15	aac(6')-Ib3^;rmtC;sat-2	-	-	-	Mrx;erm(42)*;ermB.v1*;mphA	-	-	sul1;sul2	-	-	dfrA1.v1;dfrA17	CMY-4.v1;TEM-1D.v1^	-	SHV-11^	35Q	OmpK35-17%	-	GyrA-83I;ParC-80I	KL64	K64	-	Typeable	100.00%	-	O1/O2v1	O2a	-	Typeable
876614	2018-08-21	Peru (from Honduras)	Urine	ST147	no	no	SAMN54589245	ybt 9; ICEKp3	177	-	0	-	0	-	0	-	0	-	-	NDM-1	CTX-M-15	aac(6')-Ib3*;aadA1.v1;aadA5?;aph3-Ia.v1^;sat-2	-	-	-	Mrx;erm(42)*;mphA	-	-	sul1;sul2	-	-	dfrA1.v1;dfrA17	CMY-4.v1;TEM-1D.v1^	-	SHV-11^	35Q	OmpK35-17%	-	GyrA-83I;ParC-80I	KL64	K64	-	Typeable	100.00%	-	O1/O2v1	O2a	-	Typeable
876454	2018-06-29	Peru (from Honduras)	Urine	ST147	no	no	SAMN54589229	-	0	-	0	-	0	-	0	-	0	-	-	NDM-1	-	aac(3)-IIa.v1^;rmtC;strA.v1;strB.v1	-	-	-	-	-	-	sul1	tet(A).v1	-	dfrA1.v1	CMY-6;OXA-1	-	SHV-11^	35Q	OmpK35-7%	-	GyrA-83I;ParC-80I	KL64	K64	-	Typeable	99.98%	-	O1/O2v1	O2a	-	Typeable
876606	2018-08-21	Peru (from Honduras)	Urine	ST147	no	no	SAMN54589244	ybt 9; ICEKp3	177	-	0	-	0	-	0	-	0	-	-	NDM-1	-	rmtC;sat-2	-	-	-	Mrx;erm(42)*;ermB.v1*;mphA	-	-	sul1;sul2	-	-	dfrA1.v1	CMY-4.v1	-	SHV-11^	35Q	OmpK35-17%	-	GyrA-83I;ParC-80I	KL64	K64	-	Typeable	100.00%	-	O1/O2v1	O2a	-	Typeable
876122	2017-11-07	Peru (from Honduras)	Blood	ST307	no	no	SAMN54589197	-	0	-	0	-	0	-	0	-	0	-	-	NDM-1	CTX-M-15	aac(3)-IIa.v1^;aac(6')-Ib-cr5^;rmtC	-	-	qnrB1.v2^	-	-	-	sul1	tet(A).v1	-	dfrA14.v2*	CMY-6;OXA-1	-	SHV-28^	-	-	-	GyrA-83I;ParC-80I	KL102	unknown (KL102)	-	Typeable	99.66%	-	O1/O2v2	O2afg	-	Typeable
876148	2017-11-07	Peru (from Honduras)	Blood	ST307	no	no	SAMN54589199	-	0	-	0	-	0	-	0	-	0	-	-	NDM-1	CTX-M-15	aac(3)-IIa.v1^;aac(6')-Ib-cr5^;rmtC	-	-	qnrB1.v2^	-	-	-	sul1	tet(A).v1	-	dfrA14.v2*	CMY-6	-	SHV-28^	-	-	-	GyrA-83I;ParC-80I	KL102	unknown (KL102)	-	Typeable	99.66%	-	O1/O2v2	O2afg	-	Typeable
876412	2018-06-03	Peru (from Honduras)	Wound	ST16	no	no	SAMN54589225	-	0	-	0	-	0	-	0	-	0	-	-	NDM-1	CTX-M-15	aac(6')-Ib-cr5^;rmtC;sat-2	-	-	-	Mrx;erm(42)*;mphA	-	-	sul1;sul2	tet(A).v1	-	dfrA1.v1	CMY-4.v1;OXA-1	-	SHV-1	-	OmpK35-48%;OmpK36TD	-	GyrA-83F;GyrA-87N;ParC-84K	KL51	K51	-	Typeable	100.00%	-	O3b	O3b	-	Typeable
876050	2017-09-05	Peru (from Honduras)	Fluid	ST37	no	no	SAMN54589191	-	0	-	0	-	0	-	0	-	0	-	-	NDM-1	CTX-M-15	aac(3)-IId^;aac(6')-Ib3^;aadA1.v1;rmtC;sat-2	-	-	-	erm(42)*	-	-	sul1;sul2	tet(D)	-	dfrA1.v1;dfrA14.v2*	CMY-4.v1;OXA-1;TEM-1D.v1^	-	SHV-11^	35Q	OmpK35-64%	-	-	KL12	K12	?3	Typeable	99.95%	-	OL103	unknown (OL103)	?2	Typeable
876076	2017-09-19	Peru (from Honduras)	Blood	ST37	no	no	SAMN54589193	-	0	-	0	-	0	-	0	-	0	-	-	NDM-1	-	aac(6')-Ib3^;rmtC;strA.v1;strB.v1*	-	-	-	-	-	-	sul1	-	-	dfrA21	CMY-6;TEM-1D.v1^	-	SHV-11^	35Q	OmpK35-88%;OmpK36-11%	-	-	KL12	K12	?3	Typeable	99.96%	-	OL103	unknown (OL103)	?2	Typeable
876420	2018-06-06	Peru (from Honduras)	Wound	ST16	no	no	SAMN54589226	-	0	-	0	-	0	-	0	-	0	-	-	NDM-1	CTX-M-15	aac(6')-Ib-cr5^;rmtC;sat-2	-	-	-	Mrx;erm(42)*;mphA	-	-	sul1;sul2	tet(A).v1	-	dfrA1.v1	CMY-4.v1;OXA-1	-	SHV-1	-	OmpK35-48%;OmpK36TD	-	GyrA-83F;GyrA-87N;ParC-84K	KL51	K51	-	Typeable	100.00%	-	O3b	O3b	-	Typeable
876130	2017-11-17	Peru (from Honduras)	Device	ST37	no	no	SAMN54589198	-	0	-	0	-	0	-	0	-	0	-	-	NDM-1	-	aadA1.v1;sat-2	-	-	-	erm(42)*	-	-	sul1;sul2	-	-	dfrA1.v1	CMY-4.v1	-	SHV-11^	35Q	-	-	-	KL15	K15	-	Typeable	99.82%	-	O4	O4	-	Typeable
876000	2017-04-12	Peru (from Honduras)	Fluid	ST392	no	no	SAMN54589188	-	0	-	0	-	0	-	0	-	0	-	-	NDM-1	CTX-M-15	aac(3)-IId^;aac(6')-Ib3^;aadA1.v1;rmtC;sat-2	-	-	qnrB1.v2^	erm(42)*	-	-	sul1;sul2	tet(D)	-	dfrA1.v1;dfrA14.v2*	CMY-4.v1;OXA-1;TEM-1D.v1^	-	SHV-11^	35Q	OmpK35-22%	-	GyrA-83I;ParC-80I	KL27	K27	-	Typeable	99.79%	-	O4	O4	-	Typeable
876034	2017-04-23	Peru (from Honduras)	Abscess	ST392	no	no	SAMN54589189	-	0	-	0	-	0	-	0	-	0	-	-	NDM-1	CTX-M-15	aac(3)-IId^;aac(6')-Ib3^;aadA1.v1;rmtC;sat-2	-	-	qnrB1.v2^	erm(42)*	-	-	sul1;sul2	tet(D)	-	dfrA1.v1;dfrA14.v2*	CMY-4.v1;OXA-1;TEM-1D.v1^	-	SHV-11^	35Q	OmpK35-22%	-	GyrA-83I;ParC-80I	KL27	K27	-	Typeable	99.79%	-	O4	O4	-	Typeable
876438	2018-06-21	Peru (from Honduras)	Device	ST17	no	no	SAMN54589227	-	0	-	0	-	0	-	0	-	0	-	-	NDM-1	CTX-M-15	aadA2^;aph(3')-VI;armA;strA.v1*;strB.v1*	-	-	qnrB1.v2^	mphE.v2^;msrE	-	-	sul1;sul2	tet(D)	-	dfrA12	-	-	SHV-11^	35Q	-	-	-	KL7	K7	-	Typeable	99.54%	-	O1/O2v2	O2afg	-	Typeable
876462	2018-06-29	Peru (from Honduras)	Fluid	ST17	no	no	SAMN54589230	-	0	-	0	-	0	-	0	-	0	-	-	NDM-1	CTX-M-15	aadA2^;aph(3')-VI;armA;strA.v1*;strB.v1*	-	-	qnrB1.v2^	mphE.v2^;msrE	-	-	sul1;sul2	tet(D)	-	dfrA12	-	-	SHV-11^	35Q	-	-	-	KL7	K7	-	Typeable	99.54%	-	O1/O2v2	O2afg	-	Typeable
876488	2018-07-07	Peru (from Honduras)	Fluid	ST17	no	no	SAMN54589232	-	0	-	0	-	0	-	0	-	0	-	-	NDM-1	CTX-M-15	aadA2^;aph(3')-VI;armA;strA.v1*;strB.v1*	-	-	qnrB1.v2^	mphE.v2^;msrE	-	-	sul1;sul2	tet(D)	-	dfrA12	-	-	SHV-11^	35Q	-	-	-	KL7	K7	-	Typeable	99.54%	-	O1/O2v2	O2afg	-	Typeable
876340	2018-04-25	Peru (from Honduras)	Fluid	ST17	no	no	SAMN54589219	ybt 15; ICEKp11	230	-	0	-	0	-	0	-	0	-	-	NDM-1	CTX-M-15;SHV-12^	aac(3)-IId^;aac(6')-Ib-cr.v2	-	-	qnrB1.v2^	-	-	-	-	tet(D)	-	dfrA14.v2*	OXA-1;TEM-1D.v1^	-	-	238S;240K;35Q	-	-	-	KL25	K25	!	Typeable	99.61%	-	O5	O5	-	Typeable
876202	2018-01-24	Peru (from Honduras)	Fluid	ST17	no	no	SAMN54589205	ybt 15; ICEKp11	230	-	0	-	0	-	0	-	0	-	-	NDM-1	CTX-M-15;SHV-12	aac(3)-IId^;aac(6')-Ib-cr.v2	-	-	qnrB1.v2^	-	-	-	-	tet(D)	-	dfrA14.v2*	OXA-1;TEM-1	-	-	-	-	-	-	KL25	K25	!	Typeable	99.61%	-	O5	O5	-	Typeable
876244	2018-01-28	Peru (from Honduras)	Fluid	ST17	no	no	SAMN54589209	ybt 15; ICEKp11	230	-	0	-	0	-	0	-	0	-	-	NDM-1	CTX-M-15;SHV-12	aac(3)-IId^;aac(6')-Ib-cr.v2	-	-	qnrB1.v2^	-	-	-	-	tet(D)	-	dfrA14.v2*	OXA-1;TEM-1	-	-	238S;240K;35Q	-	-	-	KL25	K25	!	Typeable	99.61%	-	O5	O5	-	Typeable
876252	2018-01-26	Peru (from Honduras)	Fluid	ST17	no	no	SAMN54589210	ybt 15; ICEKp11	230	-	0	-	0	-	0	-	0	-	-	NDM-1	CTX-M-15	aac(3)-IId^;aac(6')-Ib-cr.v2	-	-	qnrB1.v2^	-	-	-	-	tet(D)	-	dfrA14.v2*	OXA-1;TEM-1D.v1^	-	-	-	-	-	-	KL25	K25	?2!	Typeable	99.61%	-	O5	O5	-	Typeable
876180	2018-01-13	Peru (from Honduras)	Device	ST17	no	no	SAMN54589203	ybt 15; ICEKp11	230	-	0	-	0	-	0	-	0	-	-	NDM-1	CTX-M-15;SHV-12	aac(3)-IId^;aac(6')-Ib-cr.v2	-	-	qnrB1.v2^	-	-	-	-	tet(D)	-	dfrA14.v2*	OXA-1;TEM-1D.v1^	-		35Q	-	-	-	KL25	K25	!	Typeable	99.61%	-	O5	O5	-	Typeable
876172	2018-01-04	Peru (from Honduras)	Fluid	ST342	no	no	SAMN54589202	-	0	-	0	-	0	-	0	-	0	-	-	NDM-1	CTX-M-15	aac(3)-IIa.v1^;aac(6')-Ib-cr5^;rmtC;strA.v1^;strB.v1	-	-	qnrB1.v2^	-	-	-	sul1;sul2	tet(A).v1	-	dfrA14.v2*	CMY-6;OXA-1;TEM-1D.v1^	-	SHV-60	35Q	-	-	-	KL30	K30	-	Typeable	97.40%	-	O1/O2v2	O1ab	-	Typeable
876198	2018-01-15	Peru (from Honduras)	Wound	ST342	no	no	SAMN54589204	-	0	-	0	-	0	-	0	-	0	-	-	NDM-1	CTX-M-15	aac(3)-IIa.v1^;aac(6')-Ib-cr5*;rmtC;strA.v1^;strB.v1	-	-	qnrB1.v2^	-	-	-	sul1;sul2	tet(A).v1	-	dfrA14.v2*	CMY-6;OXA-1;TEM-1D.v1^	-	SHV-60	35Q	-	-	-	KL30	K30	-	Typeable	97.40%	-	O1/O2v2	O1ab	-	Typeable
876210	2018-01-22	Peru (from Honduras)	Bone marrow	ST342	no	no	SAMN54589206	-	0	-	0	-	0	-	0	-	0	-	-	NDM-1	CTX-M-15	aac(3)-IIa.v1^;aac(6')-Ib-cr5^;rmtC;strA.v1^;strB.v1	-	-	qnrB1.v2^	-	-	-	sul1;sul2	tet(A).v1	-	dfrA14.v2*	CMY-6;OXA-1;TEM-1D.v1^	-	SHV-60	35Q	-	-	-	KL30	K30	-	Typeable	97.40%	-	O1/O2v2	O1ab	-	Typeable
876404	2018-05-29	Peru (from Honduras)	Fluid	ST342	no	no	SAMN54589224	-	0	-	0	-	0	-	0	-	0	-	-	NDM-1	CTX-M-15	aac(3)-IIa.v1^;aac(6')-Ib-cr5^;rmtC;strA.v1^;strB.v1	-	-	qnrB1.v2^	-	-	-	sul1;sul2	tet(A).v1	-	dfrA14.v2*	CMY-6;OXA-1;TEM-1D.v1^	-	SHV-60	35Q	-	-	-	KL30	K30	-	Typeable	97.40%	-	O1/O2v2	O1ab	-	Typeable
876648	2018-09-18	Peru (from Honduras)	Fluid	ST364	no	no	SAMN54589248	-	0	-	0	-	0	-	0	-	0	-	-	NDM-1	-	aadA5;aph3-Ia.v1^	-	-	-	Mrx;mphA	-	-	sul1	tet(D)	-	dfrA17	TEM-135.v2	-	SHV-11^	35Q	-	-	-	KL166	unknown (KL166)	-	Typeable	99.90%	-	O1/O2v2	O1ab	-	Typeable
876470	2018-07-08	Peru (from Honduras)	Fluid	ST37	no	no	SAMN54589231	ybt 10; ICEKp4	564-1LV	-	0	-	0	-	0	-	0	-	-	NDM-1	CTX-M-15	aac(6')-Ib3^;aadA1.v1;aadA2^;rmtC;sat-2	-	-	qnrB1.v2^;qnrS1	erm(42)*	-	-	sul1;sul2	tet(D)	-	dfrA1.v1;dfrA12	CMY-4.v1;OXA-1;TEM-1D.v1^	-	SHV-11^	35Q	OmpK35-69%	-	-	KL12	K12	?3	Typeable	99.95%	-	OL103	unknown (OL103)	?2	Typeable
876374	2018-05-14	Peru (from Honduras)	Fluid	ST45	no	no	SAMN54589221	ybt 10; ICEKp4	78	-	0	-	0	-	0	-	0	-	-	NDM-1	CTX-M-15	aac(3)-IId^;aac(6')-Ib-cr5*;rmtC	-	-	qnrB1.v2^	-	-	-	sul1	tet(D)	-	dfrA14.v2*	CMY-6;OXA-1;TEM-1	-	SHV-1^	-	-	-	-	KL24	K24	?2	Typeable	99.54%	-	O1/O2v1	O2a	-	Typeable
876390	2018-05-28	Peru (from Honduras)	Fluid	ST45	no	no	SAMN54589223	ybt 10; ICEKp4	78	-	0	-	0	-	0	-	0	-	-	NDM-1	CTX-M-15	aac(3)-IId^;aac(6')-Ib-cr5*;rmtC	-	-	qnrB1.v2^	-	-	-	sul1	tet(D)	-	dfrA14.v2*	CMY-6;OXA-1;TEM-1	-	SHV-1^	-	-	-	-	KL24	K24	?2	Typeable	99.54%	-	O1/O2v1	O2a	-	Typeable
876236	2018-01-24	Peru (from Honduras)	Blood	ST258	no	no	SAMN54589208	-	0	-	0	-	0	-	0	-	0	-	-	KPC-2	CTX-M-15	aac(3)-IId^;aac(3)-IV;aadA2;aph(4)-Ia;aph3-Ia.v1^	-	-	qnrB1.v2^	Mrx;mphA	catA1^;cmlA1*	-	sul3	tet(D)	-	dfrA14.v2*	OXA-1	-	SHV-11	35Q	OmpK35-25%	-	GyrA-83I;ParC-80I	KL25	K25	!	Typeable	99.65%	-	O5	O5	-	Typeable
876576	2018-08-06	Peru (from Honduras)	Fluid	ST743-1LV	no	no	SAMN54589241	-	0	-	0	-	0	-	0	-	0	-	-	NDM-1	CTX-M-15;SHV-12	aac(6')-Ib-cr.v2;aadA5;armA	-	-	qnrB19^	mphE.v2;msrE	catB3.v2	-	sul1	-	-	dfrA17	OXA-1	-	-	238S;240K;35Q	-	-	-	KL8	K8	!	Typeable	98.41%	-	O5	O5	-	Typeable
876164	2017-12-27	Peru (from Honduras)	Blood	ST2632	no	no	SAMN54589201	-	0	-	0	-	0	-	0	-	0	-	-	KPC-2	CTX-M-15	aac(3)-IIa.v1;aac(6')-Ian;aadA2^;aph3-Ia.v1^;strB.v1*	-	-	qnrS1	Mrx;mphA	catA1^;cmlA4*	-	sul1;sul2	-	-	dfrA12;dfrA15.v2*	-	-	SHV-93^	156D;35Q	OmpK36-40%	-	-	KL54	K54	-	Typeable	99.78%	-	O1/O2v2	O1ab	-	Typeable
876382	2018-05-15	Peru (from Honduras)	Abscess	ST39	no	no	SAMN54589222	-	0	-	0	-	0	-	0	-	0	-	-	-	CTX-M-15	aac(3)-IIa.v1^;aac(6')-Ib3*;aadA1.v1;sat-2	-	-	qnrB1.v2^	erm(42)*	-	-	sul1;sul2	tet(A).v1	-	dfrA1.v1;dfrA14.v2*	CMY-4.v1;OXA-1	-	SHV-11^	35Q	-	-	-	KL23	K23	-	Typeable	99.94%	-	O1/O2v2	O1ab	-	Typeable
876114	2017-10-23	Peru (from Honduras)	Blood	ST45	no	no	SAMN54589196	ybt 10; ICEKp4	78-1LV	-	0	-	0	-	0	-	0	-	-	-	CTX-M-15	aac(3)-IId^;aac(6')-Ib-cr.v2	-	-	-	-	catA1^	-	-	tet(D)	-	dfrA14.v2*	OXA-1;TEM-1D.v1^	-	SHV-1	-	-	-	-	KL24	K24	?3-	Typeable	99.53%	KL24_12_wcuE	O1/O2v1	O2a	-	Typeable
876228	2018-01-24	Peru (from Honduras)	Wound	ST45	no	no	SAMN54589207	ybt 10; ICEKp4	78	-	0	-	0	-	0	-	0	-	-	KPC-2	CTX-M-15	aac(6')-Ian;aac(6')-Ib-cr.v2;aadA2^;aph3-Ia.v1^;strB.v1*	-	-	qnrS1	Mrx;mphA	catA1^	-	sul1;sul2	tet(D)	-	dfrA12;dfrA14.v2*	OXA-1	-	SHV-1	-	-	-	-	KL24	K24	?3-	Typeable	99.53%	KL24_12_wcuE	O1/O2v1	O2a	-	Typeable
876698	2018-12-01	Peru (from Panama)	Blood	ST111	no	no	SAMN54589253	-	0	-	0	-	0	-	0	-	0	-	-	KPC-2	-	aac(6')-Ib-cr.v2;aadA16*;aadA2	-	-	-	-	-	arr-3	sul1	tet(D)	-	dfrA21;dfrA27	-	-	SHV-11^	35Q	-	-	-	KL63	Capsule null	!	Typeable	99.80%	-	O1/O2v2	O2afg	!	Typeable
876656	2018-12-01	Peru (from Panama)	Fluid	ST147	no	no	SAMN54589249	-	0	-	0	-	0	-	0	-	0	-	-	-	CTX-M-15	aac(3)-IIa.v1^;aac(6')-Ib-cr.v2;strA.v1^;strB.v1	-	-	qnrB19^	-	-	-	sul2	tet(A).v1	-	dfrA14.v2*	OXA-1;TEM-1D.v1^	-	SHV-11^	35Q	OmpK36-46%	-	GyrA-83I;ParC-80I	KL81	K81	?6	Typeable	99.82%	-	OL13	O13	?8!	Typeable
876664	2018-06-01	Peru (from Panama)	Surveillance	ST152	no	no	SAMN54589250	ybt 10; ICEKp4	325	-	0	-	0	-	0	-	0	-	-	-	CTX-M-15	aac(3)-IIa.v1^;strA.v1^;strB.v1	-	-	qnrB6^	-	catA1^	arr-3	sul1;sul2	-	-	dfrA27	OXA-1;TEM-1D.v1^	-	SHV-1^	-	OmpK36-0%	-	GyrA-83F;GyrA-87A;ParC-80I	KL149	unknown (KL149)	-	Typeable	99.98%	-	O4	O4	-	Typeable
876672	2018-11-01	Peru (from Panama)	Fluid	ST37	no	no	SAMN54589251	-	0	-	0	-	0	-	0	-	0	-	-	CTX-M-33	-	aac(6')-Ib-cr.v2;ant(2'')-Ia	-	-	qnrA1	mphE.v2;msrE	-	-	sul1*	-	-	dfrA19*	FOX-5;OXA-1	-	SHV-11^	35Q	OmpK35-43%;OmpK36-75%	MgrB-62%	-	KL12	K12	?3	Typeable	99.95%	-	OL103	unknown (OL103)	?2	Typeable
876680	2018-12-01	Peru (from Panama)	Urine	ST307	no	no	SAMN54589252	-	0	-	0	-	0	-	0	-	0	-	-	NDM-5	CTX-M-15	aac(3)-IIa.v1^;aac(6')-Ib-cr.v2;strA.v1^;strB.v1	-	-	qnrB1.v2^	-	-	-	sul2	tet(A).v1	-	dfrA14.v2*	OXA-1;TEM-1D.v1^	-	SHV-28^	-	-	-	GyrA-83I;ParC-80I	KL102	unknown (KL102)	-	Typeable	99.65%	-	O1/O2v2	O2afg	-	Typeable
681012	2018-06-03	Philippines	Device	ST147	no	no	SAMN54588660	ybt 10; ICEKp4	91-1LV	-	0	-	0	-	0	-	0	-	-	KPC-2	-	-	-	-	-	erm(42)^	catII.2*	-	-	-	-	dfrA14.v2*	OXA-1;TEM-1D.v1^	-	SHV-11^	35Q	OmpK35-28%	-	GyrA-83I;ParC-80I	KL64	K64	-	Typeable	100.00%	-	O1/O2v1	O2a	-	Typeable
681020	2015-09-14	Philippines	Blood	ST340	no	no	SAMN54588661	ybt 9; ICEKp3	183	-	0	-	0	-	0	-	0	-	-	NDM-7	CTX-M-15	aac(3)-IIa.v1^;aac(6')-Ib-cr.v2;aadA2^;strA.v1^;strB.v1	-	-	qnrB1.v2^	erm(42)^	-	-	sul1;sul2	tet(A).v1	-	dfrA12;dfrA14.v2*	OXA-1;TEM-1D.v1^	-	SHV-11	35Q	-	-	GyrA-83I;ParC-80I	KL15	K15	-	Typeable	99.98%	-	O4	O4	-	Typeable
681038	2015-10-01	Philippines	Blood	ST340	no	no	SAMN54588662	ybt 9; ICEKp3	183	-	0	-	0	-	0	-	0	-	-	NDM-7	CTX-M-15	aac(3)-IIa.v1^;aac(6')-Ib-cr.v2;aadA2^;strA.v1^;strB.v1	-	-	qnrB1.v2^	erm(42)^	-	-	sul1;sul2	tet(A).v1	-	dfrA12;dfrA14.v2*	OXA-1;TEM-1D.v1^	-	SHV-11	35Q	-	-	GyrA-83I;ParC-80I	KL15	K15	-	Typeable	99.98%	-	O4	O4	-	Typeable
681046	2015-10-04	Philippines	Wound	ST231	no	no	SAMN54588663	ybt 10; ICEKp4	91	-	0	-	0	-	0	-	0	-	-	NDM-1	CTX-M-15	aac(6')-Ib-cr.v2;aadA16*;rmtC	-	-	qnrB6^	Mrx;mphA	-	arr-3	sul1	tet(A).v1	-	dfrA14.v2*;dfrA27	TEM-1D.v1^	-	SHV-1^	-	OmpK35-7%	-	GyrA-83I;ParC-80I	KL51	K51	!	Typeable	99.72%	-	O1/O2v2	O1ab	-	Typeable
681054	2015-10-18	Philippines	Urine	ST340	no	no	SAMN54588664	ybt 9; ICEKp3	183	-	0	-	0	-	0	-	0	-	-	NDM-7	CTX-M-15	aac(3)-IIa.v1^;aac(6')-Ib-cr.v2;aadA2^;strA.v1^;strB.v1	-	-	qnrB1.v2^	erm(42)^	-	-	sul1;sul2	tet(A).v1	-	dfrA12;dfrA14.v2*	OXA-1;TEM-1D.v1^	-	SHV-11	35Q	-	-	GyrA-83I;ParC-80I	KL15	K15	-	Typeable	99.98%	-	O4	O4	-	Typeable
681062	2015-10-28	Philippines	Wound	ST231	no	no	SAMN54588665	ybt 10; ICEKp4	91	-	0	-	0	-	0	-	0	-	-	NDM-1	CTX-M-15	aac(6')-Ib-cr.v2;aadA16*;rmtC	-	-	qnrB6^	Mrx;erm(42)^;mphA	-	arr-3	sul1	tet(A).v1	-	dfrA12;dfrA14.v2*;dfrA27	TEM-1D.v1^	-	SHV-1^	-	OmpK35-7%	-	GyrA-83I;ParC-80I	KL51	K51	?2!	Typeable	99.74%	-	O1/O2v2	O1ab	-	Typeable
681070	2017-05-31	Philippines	Urine	ST359	no	no	SAMN54588666	-	0	-	0	-	0	-	0	-	0	-	-	NDM-1	SHV-12	aadA*;aph(3')-Ia	-	-	qnrA1;qnrS1	Mrx;mphA*	floR.v2*	-	sul1;sul2	-	-	-	OXA-10	-	-	-	OmpK35-21%	-	-	KL62	K62	?3!	Typeable	99.64%	-	O1/O2v2	O1ab	-	Typeable
681088	2017-06-11	Philippines	Device	ST392	no	no	SAMN54588667	-	0	-	0	-	0	-	0	-	0	-	-	-	CTX-M-15	aac(6')-Ib-cr.v2;aadA2;strA.v1^;strB.v1	-	-	qnrB1.v2^	-	floR.v1*	-	sul2;sul3	-	-	dfrA12;dfrA14.v2*	OXA-1;TEM-1D.v1^	-	SHV-11^	35Q	-	-	GyrA-83I;ParC-80I	KL27	K27	-	Typeable	99.77%	-	O4	O4	-	Typeable
681096	2017-06-06	Philippines	Device	ST147	no	no	SAMN54588668	-	0	-	0	-	0	-	0	-	0	-	-	NDM-1	CTX-M-15;SHV-12	aac(6')-Ib-cr.v2;aadA*;aadA16*;strA.v1^;strB.v1	-	-	qnrB17*?;qnrS1	Mrx;erm(42)^;mphA	cmlA5;floR.v2*	arr-2;arr-3	sul1;sul2	tet(A).v1	-	dfrA14.v2*;dfrA27	OXA-1;OXA-10;TEM-1D.v1^	-	-	-	OmpK35-30%	-	GyrA-83I;ParC-80I	KL169	unknown (KL169)	?8+	Typeable	99.99%	-	OL104	unknown (OL104)	?4	Typeable
681100	2017-10-13	Philippines	Human	ST4	no	no	SAMN54588669	-	0	-	0	-	0	-	0	-	0	-	-	NDM-7	CTX-M-15	aac(6')-Ib-cr.v2;aadA16*;aph3-Ia.v1^;strA.v1;strB.v1	-	-	qnrB6^;qnrS1	Mrx;mphA	floR.v2*	arr-3	sul1;sul2	-	-	dfrA12;dfrA27	TEM-1D.v1^	-	SHV-11^	35Q	-	-	GyrA-83F;GyrA-87N;ParC-80I	KL13	K13	-	Typeable	99.94%	-	O1/O2v1	O1ab	-	Typeable
681118	2017-10-13	Philippines	Human	ST4	no	no	SAMN54588670	-	0	-	0	-	0	-	0	-	0	-	-	NDM-7	CTX-M-15	aadA16*;aph3-Ia.v1^;strA.v1;strB.v1	-	-	qnrB6^;qnrS1	Mrx;mphA	floR.v2*	arr-3	sul1;sul2	-	-	dfrA12;dfrA27	TEM-1D.v1^	-	SHV-11^	35Q	-	-	GyrA-83F;GyrA-87N;ParC-80I	KL13	K13	-	Typeable	99.94%	-	O1/O2v1	O1ab	-	Typeable
681126	2017-10-21	Philippines	Human	ST4	no	no	SAMN54588671	-	0	-	0	-	0	-	0	-	0	-	-	NDM-7	CTX-M-15	aac(6')-Ib-cr.v2;aadA16*;aph3-Ia.v1^;strA.v1;strB.v1	-	-	qnrB6^;qnrS1	Mrx;mphA	floR.v2*	arr-3	sul1;sul2	-	-	dfrA12;dfrA27	-	-	SHV-11^	35Q	-	-	GyrA-83F;GyrA-87N;ParC-80I	KL13	K13	-	Typeable	99.94%	-	O1/O2v1	O1ab	-	Typeable
681134	2018-04-20	Philippines	Blood	ST147	no	no	SAMN54588672	ybt 16; ICEKp12	280	-	0	-	0	-	0	-	0	-	-	NDM-1	CTX-M-15	aadA*;aph(3')-Ia;aph(3')-VI;strA.v1;strB.v1	-	-	qnrS1	Mrx;mphA*	cmlA5;floR.v2*	arr-2	sul1;sul2	-	-	dfrA14.v2*	OXA-10	-	SHV-11^	35Q	OmpK35-7%	-	GyrA-83I;ParC-80I	KL64	K64	-	Typeable	100.00%	-	O1/O2v1	O2a	-	Typeable
681142	2018-04-24	Philippines	Human	ST273	no	no	SAMN54588673	-	0	-	0	-	0	-	0	-	0	-	-	NDM-7	CTX-M-15	aac(3)-IId^;aac(6')-Ib-cr.v2;aadA5;strB.v1	-	-	qnrB1.v2^	Mrx;mphA	-	-	sul1;sul2	tet(A).v1;tet(D)	-	dfrA14.v2*;dfrA17	OXA-1;TEM-1D.v1^	-	SHV-11^	35Q	-	-	GyrA-83I;ParC-80I	KL74	K74	?4	Typeable	99.42%	-	OL104	unknown (OL104)	?2	Typeable
681150	2018-07-02	Philippines	Respiratory	ST147	no	no	SAMN54588674	ybt 16; ICEKp12	280	-	0	-	0	-	0	-	0	-	-	NDM-7	CTX-M-15	aac(6')-Ib-cr.v2;aadA16*;strA.v1;strB.v1	-	-	qnrB1.v1;qnrS1	Mrx;erm(42)^;mphA	-	arr-3	sul1	tet(A).v1	-	dfrA27	TEM-1D.v1^	-	-	-	OmpK35-7%	-	GyrA-83I;ParC-80I	KL64	K64	-	Typeable	100.00%	-	O1/O2v1	O2a	-	Typeable
681168	2018-07-28	Philippines	Stool	ST147	no	no	SAMN54588675	ybt 10; ICEKp4	91-1LV	-	0	-	0	-	0	-	0	-	-	KPC-2	-	aac(6')-Ib-cr.v2;strA.v1^;strB.v1	-	-	qnrB1.v2^	erm(42)^	catII.2*	-	sul2	tet(A).v1	-	dfrA14.v2*	OXA-1	-	SHV-11^	35Q	OmpK35-28%	-	GyrA-83I;ParC-80I	KL64	K64	-	Typeable	100.00%	-	O1/O2v1	O2a	-	Typeable
681176	2018-08-21	Philippines	Unknown	ST147	no	no	SAMN54588676	ybt 10; ICEKp4	91-1LV	-	0	-	0	-	0	-	0	-	-	KPC-2	CTX-M-15	aac(6')-Ib-cr.v2;strA.v1^;strB.v1	-	-	qnrB1.v2^	erm(42)^	catII.2*	-	sul2	tet(A).v1	-	dfrA14.v2*	OXA-1	-	SHV-11^	35Q	OmpK35-28%	-	GyrA-83I;ParC-80I	KL64	K64	-	Typeable	100.00%	-	O1/O2v1	O2a	-	Typeable
681184	2018-09-23	Philippines	Blood	ST147	no	no	SAMN54588677	ybt 10; ICEKp4	91-1LV	-	0	-	0	-	0	-	0	-	-	KPC-2	-	aac(6')-Ib-cr.v2;strA.v1^;strB.v1	-	-	qnrB1.v2^	erm(42)^	-	-	sul2	tet(A).v1	-	dfrA14.v2*	OXA-1	-	SHV-11^	35Q	OmpK35-28%	-	GyrA-83I;ParC-80I	KL64	K64	-	Typeable	100.00%	-	O1/O2v1	O2a	-	Typeable
681192	2018-09-03	Philippines	Respiratory	ST147	no	no	SAMN54588678	-	0	-	0	-	0	-	0	-	0	-	-	NDM-1	SHV-12	aadA*;aph(3')-Ia;aph3-Ia.v1^;strA.v1*;strB.v1	-	-	qnrA1;qnrS1	-	floR.v2*	-	sul1;sul2	tet(D)	-	dfrA25	OXA-10;TEM-1D.v1^	-	-	-	OmpK35-4%	-	GyrA-83I;ParC-80I	KL128	unknown (KL128)	-	Typeable	99.97%	-	O3b	O3b	-	Typeable
715571	2017-11-04	Philippines	Wound	ST15	no	no	SAMN54588746	-	0	-	0	-	0	-	0	-	0	-	-	KPC-2	SHV-12	aac(3)-IIa.v1^;aac(6')-Ib-cr.v2;aadA*;aadA2^	-	-	qnrB1.v1	Mrx;mphA	cmlA5	arr-2	sul1	tet(A).v1	-	dfrA12;dfrA14.v2*	OXA-1;OXA-10	-	-	-	-	-	GyrA-83F;GyrA-87A;ParC-80I	KL112	unknown (KL112)	-	Typeable	99.53%	-	O1/O2v1	O1ab	-	Typeable
825854	2016-09-09	Philippines	Wound	ST280	no	no	SAMN54589002	-	0	-	0	-	0	-	0	-	0	-	-	NDM-1	CTX-M-15	aac(6')-Ib-cr.v2;rmtC	-	-	qnrB1.v2^	-	-	-	sul1*	tet(A).v1	-	-	OXA-1*	-	SHV-27	156D	-	-	-	KL23	K23	-	Typeable	99.98%	-	O1/O2v2	O2afg	?2	Typeable
715589	2018-05-27	Philippines	Human	ST231	no	no	SAMN54588747	ybt 10; ICEKp4	91	-	0	-	0	-	0	-	0	-	-	NDM-1	CTX-M-15	aadA16*;rmtC	-	-	qnrB6^;qnrS1	Mrx;mphA	-	arr-3	sul1	-	-	dfrA27	TEM-1D.v1^	-	SHV-1^	-	OmpK35-7%	-	GyrA-83I;ParC-80I	KL51	K51	?2!	Typeable	99.74%	-	O1/O2v2	O1ab	-	Typeable
715597	2018-05-14	Philippines	Human	ST392	no	no	SAMN54588748	-	0	-	0	-	0	-	0	-	0	-	-	NDM-1	CTX-M-15;SHV-12	aac(6')-Ib-cr.v2;aadA*;aadA16*;aph(3')-Ia;strA.v1^;strB.v1	-	-	qnrA1;qnrB1.v2^;qnrB6^	Mrx	catII.2*;floR.v2*	arr-3	sul1;sul2	tet(A).v1	-	dfrA14.v2*;dfrA27	OXA-1*;OXA-10;TEM-1D.v1^	-	-	238S;240K;35Q	OmpK35-64%	-	GyrA-83I;ParC-80I	KL27	K27	-	Typeable	99.79%	-	O4	O4	?2	Typeable
825846	2016-04-08	Philippines	Urine	ST273	no	no	SAMN54589001	-	0	-	0	-	0	-	0	-	0	-	-	-	CTX-M-15	aac(6')-Ib-cr.v2;strA.v1*;strB.v1*	-	-	qnrS1	-	catII.2*	-	sul2	tet(D)	-	-	OXA-1;TEM-1D.v1^	-	SHV-11^	35Q	OmpK35-18%	-	GyrA-83I;ParC-80I	KL15	K15	-	Typeable	99.98%	-	O4	O4	-	Typeable
715563	2017-10-20	Philippines	Wound	ST147	no	no	SAMN54588745	ybt 16; ICEKp12	280-1LV	-	0	-	0	-	0	-	0	-	-	NDM-7	CTX-M-15;SHV-31^	aac(6')-Ib-cr.v2;aadA16*	-	-	qnrB1.v1	Mrx;mphA	-	arr-3	sul1	tet(A).v1	-	dfrA27	TEM-1D.v1^	-	-	240K;35Q	OmpK35-7%	-	GyrA-83I;ParC-80I	KL64	K64	-	Typeable	100.00%	-	O1/O2v1	O2a	-	Typeable
365572	2016-01-27	Thailand	Urine	ST14	no	no	SAMN54588133	-	0	-	0	-	0	-	0	-	0	-	-	NDM-1;OXA-232	CTX-M-15	aadA*;aadA2^;aph(3')-VI;armA;sat-2	-	-	qnrB1.v2^	mphE.v2^;msrE	catA1^	-	sul1	tet(D)	-	dfrA1.v1;dfrA12;dfrA14.v2*	OXA-1;OXA-9.v1	-	SHV-28^	-	OmpK36GD	-	GyrA-83Y;GyrA-87G;ParC-80I	KL2	K2	-	Typeable	99.81%	-	O1/O2v1	O1ab	?2	Typeable
365581	2016-01-27	Thailand	Human	ST2071	yes	no	SAMN54588134	-	0	-	0	iuc 5	61-3LV	-	0	-	0	-	-	NDM-1	CTX-M-15	aac(6')-Ib;aadA2^;rmtF	-	-	qnrB1.v1	Mrx;ermB.v1*;mphA	-	arr-2	sul1	-	-	dfrA12	TEM-1D.v1^	-	SHV-1^	-	OmpK35-30%	-	GyrA-83I;ParC-80I	KL51	K51	?2!	Typeable	99.73%	-	O1/O2v2	O1ab	-	Typeable
365590	2016-01-27	Thailand	Human	ST2071	yes	yes	SAMN54588135	-	0	-	0	iuc 5	61-3LV	-	0	-	0	-	-	NDM-1	CTX-M-15	aac(6')-Ib?;aadA2^;rmtF	-	-	qnrB1.v1	Mrx;ermB.v1*;mphA	-	arr-2	sul1	-	-	dfrA12	TEM-1D.v1^	-	SHV-1^	-	OmpK35-30%	-	GyrA-83I;ParC-80I	KL51	K51	!	Typeable	99.69%	-	O1/O2v2	O1ab	-	Typeable
365606	2016-01-27	Thailand	Urine	ST14	no	no	SAMN54588136	-	0	-	0	-	0	-	0	-	0	-	-	NDM-1;OXA-232	CTX-M-15	aac(6')-Ib-cr.v2;aadA*;aadA2^;aph(3')-VI;armA;sat-2	-	-	qnrB1.v2^	mphE.v2^;msrE	catA1^	-	sul1	tet(D)	-	dfrA1.v1;dfrA12;dfrA14.v2*	OXA-1;OXA-9.v1	-	SHV-28^	-	OmpK36GD	-	GyrA-83Y;GyrA-87G;ParC-80I	KL2	K2	-	Typeable	99.81%	-	O1/O2v1	O1ab	?2	Typeable
365615	2016-01-27	Thailand	Human	ST2071	yes	no	SAMN54588137	-	0	-	0	iuc 5	61-3LV	-	0	-	0	-	-	NDM-1	CTX-M-15	aac(6')-Ib;aadA2^;rmtF	-	-	qnrB1.v1	Mrx;ermB.v1*;mphA	-	arr-2	sul1	-	-	dfrA12	TEM-1D.v1^	-	SHV-1^	-	OmpK35-30%	-	GyrA-83I;ParC-80I	KL51	K51	!	Typeable	99.72%	-	O1/O2v2	O1ab	-	Typeable
365624	2016-01-27	Thailand	Urine	ST14	no	no	SAMN54588138	-	0	-	0	-	0	-	0	-	0	-	-	NDM-1;OXA-232	CTX-M-15	aac(6')-Ib-cr.v2;aadA*;aadA2^;aph(3')-VI;armA;sat-2	-	-	-	mphE.v2^;msrE	catA1^	-	sul1	tet(D)	-	dfrA1.v1;dfrA12	OXA-1;OXA-9.v1	-	SHV-28^	-	OmpK36GD	-	GyrA-83Y;GyrA-87G;ParC-80I	KL2	K2	-	Typeable	99.81%	-	O1/O2v1	O1ab	?2	Typeable
365633	2016-01-27	Thailand	Human	ST2071	yes	no	SAMN54588139	-	0	-	0	iuc 5	61-3LV	-	0	-	0	-	-	NDM-1	CTX-M-15	aac(6')-Ib;aadA2^;rmtF	-	-	qnrB1.v1	Mrx;ermB.v1*;mphA	-	arr-2	sul1	-	-	dfrA12	TEM-1D.v1^	-	SHV-1^	-	OmpK35-30%	-	GyrA-83I;ParC-80I	KL51	K51	!	Typeable	99.72%	-	O1/O2v2	O1ab	-	Typeable
365642	2016-01-27	Thailand	Urine	ST14	no	no	SAMN54588140	-	0	-	0	-	0	-	0	-	0	-	-	NDM-1;OXA-232	CTX-M-15	aadA*;aadA2^;aph(3')-VI;armA;sat-2	-	-	qnrB1.v2^	mphE.v2^;msrE	catA1^	-	sul1	tet(D)	-	dfrA1.v1;dfrA12;dfrA14.v2*	OXA-1;OXA-9.v1	-	SHV-28^	-	OmpK36GD	-	GyrA-83Y;GyrA-87G;ParC-80I	KL2	K2	-	Typeable	99.81%	-	O1/O2v1	O1ab	?2	Typeable
365651	2016-01-27	Thailand	Human	ST2071	yes	no	SAMN54588141	-	0	-	0	iuc 5	61-3LV	-	0	-	0	-	-	NDM-1	CTX-M-15	aac(6')-Ib;aadA2^;rmtF	-	-	qnrB1.v1	Mrx;ermB.v1*;mphA	-	arr-2	sul1	-	-	dfrA12	TEM-1D.v1^	-	SHV-1^	-	OmpK35-30%	-	GyrA-83I;ParC-80I	KL51	K51	!	Typeable	99.72%	-	O1/O2v2	O1ab	-	Typeable
365660	2016-01-27	Thailand	Urine	ST14	no	no	SAMN54588142	-	0	-	0	-	0	-	0	-	0	-	-	NDM-1;OXA-232	CTX-M-15	aac(6')-Ib-cr.v2;aadA*;aadA2^;aph(3')-VI;armA;sat-2	-	-	qnrB1.v2^	mphE.v2^;msrE	catA1^	-	sul1	tet(D)	-	dfrA1.v1;dfrA12;dfrA14.v2*	OXA-1;OXA-9.v1	-	SHV-28^	-	OmpK36GD	-	GyrA-83Y;GyrA-87G;ParC-80I	KL2	K2	-	Typeable	99.81%	-	O1/O2v1	O1ab	?2	Typeable
365679	2016-01-27	Thailand	Human	ST2071	yes	no	SAMN54588143	-	0	-	0	iuc 5	61-3LV	-	0	-	0	-	-	NDM-1	CTX-M-15	aac(6')-Ib?;aadA2^;rmtF	-	-	qnrB1.v1	Mrx;ermB.v1*;mphA	-	arr-2	sul1	-	-	dfrA12	TEM-1D.v1^	-	SHV-1^	-	OmpK35-30%	-	GyrA-83I;ParC-80I	KL51	K51	!	Typeable	99.72%	-	O1/O2v2	O1ab	-	Typeable
365688	2016-01-27	Thailand	Human	ST2071	yes	no	SAMN54588144	-	0	-	0	iuc 5	61-3LV	-	0	-	0	-	-	NDM-1	CTX-M-15	aac(6')-Ib;aadA2^;rmtF	-	-	qnrB1.v1	Mrx;ermB.v1*;mphA	-	arr-2	sul1	-	-	dfrA12	TEM-1D.v1^	-	SHV-1^	-	OmpK35-30%	-	GyrA-83I;ParC-80I	KL51	K51	!	Typeable	99.72%	-	O1/O2v2	O1ab	-	Typeable
365697	2016-01-27	Thailand	Human	ST2071	yes	no	SAMN54588145	-	0	-	0	iuc 5	61-3LV	-	0	-	0	-	-	NDM-1	CTX-M-15	aac(6')-Ib;aadA2^;rmtF	-	-	qnrB1.v1	Mrx;ermB.v1*;mphA	-	arr-2	sul1	-	-	dfrA12	TEM-1D.v1^	-	SHV-1^	-	OmpK35-30%	-	GyrA-83I;ParC-80I	KL51	K51	!	Typeable	99.72%	-	O1/O2v2	O1ab	-	Typeable
365703	2016-01-27	Thailand	Urine	ST14	no	no	SAMN54588146	-	0	-	0	-	0	-	0	-	0	-	-	NDM-1;OXA-232	CTX-M-15	aadA*;aadA2^;aph(3')-VI;armA;sat-2	-	-	-	mphE.v2^;msrE	catA1^	-	sul1	tet(D)	-	dfrA1.v1;dfrA12	OXA-1;OXA-9.v1	-	SHV-28^	-	OmpK36GD	-	GyrA-83Y;GyrA-87G;ParC-80I	KL2	K2	-	Typeable	99.81%	-	O1/O2v1	O1ab	?2	Typeable
365712	2016-01-27	Thailand	Human	ST2071	yes	no	SAMN54588147	-	0	-	0	iuc 5	61-3LV	-	0	-	0	-	-	-	CTX-M-15	aac(6')-Ib;aadA2^;rmtF	-	-	qnrB1.v1	Mrx;ermB.v1*;mphA	-	arr-2	sul1	-	-	dfrA12	TEM-1D.v1^	-	SHV-1^	-	OmpK35-30%	-	GyrA-83I;ParC-80I	KL51	K51	!	Typeable	99.72%	-	O1/O2v2	O1ab	-	Typeable
365721	2016-01-27	Thailand	Unknown	ST14	no	no	SAMN54588148	-	0	-	0	-	0	-	0	-	0	-	-	NDM-1;OXA-232	CTX-M-15	aadA*;aadA2^;aph(3')-VI;armA;sat-2	-	-	qnrB1.v2^	mphE.v2^;msrE	catA1^	-	sul1	tet(D)	-	dfrA1.v1;dfrA12;dfrA14.v2*	OXA-1;OXA-9.v1	-	SHV-28^	-	OmpK36GD	-	GyrA-83Y;GyrA-87G;ParC-80I	KL2	K2	-	Typeable	99.81%	-	O1/O2v1	O1ab	?2	Typeable
365730	2016-01-27	Thailand	Human	ST2071	yes	no	SAMN54588149	-	0	-	0	iuc 5	61-3LV	-	0	-	0	-	-	NDM-1	CTX-M-15	aac(6')-Ib;aadA2^;rmtF	-	-	qnrB1.v1	Mrx;ermB.v1*;mphA	-	arr-2	sul1	-	-	dfrA12	TEM-1D.v1^	-	SHV-1^	-	OmpK35-30%	-	GyrA-83I;ParC-80I	KL51	K51	!	Typeable	99.72%	-	O1/O2v2	O1ab	-	Typeable
365749	2016-01-27	Thailand	Human	ST1995	no	no	SAMN54588150	-	0	-	0	-	0	-	0	-	0	-	-	-	-	aac(3)-IId^;strA.v1*;strB.v1*	-	-	qnrS1	-	-	-	sul2	tet(D)	-	dfrA14.v2*	LAP-2	-	SHV-27	156D	-	-	-	KL153	unknown (KL153)	-	Typeable	99.95%	-	O1/O2v1	O2a	?2	Typeable
479185	2017-04-15	Thailand	Respiratory	ST16	no	no	SAMN54588217	ybt 9; ICEKp3	174	-	0	-	0	-	0	-	0	-	-	NDM-1;OXA-232	CTX-M-15	aadA*;aadA2^	-	-	-	-	-	-	sul1	tet(B).v2*;tetR*	-	dfrA12	OXA-9.v1	-	SHV-1	-	OmpK35-76%	-	GyrA-83F;GyrA-87N;ParC-84K	KL51	K51	-	Typeable	99.98%	-	O3b	O3b	-	Typeable
479200	2017-04-15	Thailand	Rectal	ST16	no	no	SAMN54588218	ybt 9; ICEKp3	174	-	0	-	0	-	0	-	0	-	-	NDM-1;OXA-232	CTX-M-15	aadA*;aadA2^	-	-	-	-	-	-	sul1	tet(B).v2*;tetR*	-	dfrA12	OXA-9.v1	-	SHV-1	-	OmpK35-76%	-	GyrA-83F;GyrA-87N;ParC-84K	KL51	K51	-	Typeable	99.98%	-	O3b	O3b	-	Typeable
479273	2017-04-15	Thailand	Rectal	ST16	no	no	SAMN54588219	ybt 9; ICEKp3	174	-	0	-	0	-	0	-	0	-	-	NDM-1;OXA-232	CTX-M-15	aadA*;aadA2^	-	-	-	-	-	-	sul1	tet(B).v2*;tetR*	-	dfrA12	OXA-9.v1	-	SHV-1	-	OmpK35-76%	-	GyrA-83F;GyrA-87N;ParC-84K	KL51	K51	-	Typeable	99.98%	-	O3b	O3b	-	Typeable
479282	2017-04-15	Thailand	Rectal	ST16	no	no	SAMN54588220	ybt 9; ICEKp3	174	-	0	-	0	-	0	-	0	-	-	NDM-1;OXA-232	CTX-M-15	aac(3)-IId^	-	-	-	Mrx;ermB.v1*;mphA	-	-	sul1	tet(B).v2*;tetR*	-	dfrA12	CMY-2.v2	-	SHV-1	-	OmpK35-76%	-	GyrA-83F;GyrA-87N;ParC-84K	KL51	K51	-	Typeable	99.98%	-	O3b	O3b	-	Typeable
479325	2017-04-15	Thailand	Respiratory	ST1658	no	no	SAMN54588221	-	0	-	0	-	0	-	0	-	0	-	-	-	CTX-M-15	aac(6')-Ib-cr.v2;strA.v1;strB.v1	-	-	-	-	floR.v2*	-	sul2	tet(A).v1?	-	-	OXA-1;TEM-1D.v1^	-	SHV-1	-	-	-	-	KL21	K21	?3	Typeable	99.57%	-	O3b	O3b	?3	Typeable
479398	2017-04-15	Thailand	Urine	ST16	no	no	SAMN54588222	ybt 9; ICEKp3	174	-	0	-	0	-	0	-	0	-	-	NDM-1;OXA-232	CTX-M-15	aadA*;aadA2^	-	-	-	-	-	-	sul1	tet(B).v2*;tetR*	-	dfrA12	OXA-9.v1	-	SHV-1	-	OmpK35-76%	-	GyrA-83F;GyrA-87N;ParC-84K	KL51	K51	-	Typeable	99.97%	-	O3b	O3b	-	Typeable
479404	2017-04-15	Thailand	Rectal	ST16	no	no	SAMN54588223	ybt 9; ICEKp3	174	-	0	-	0	-	0	-	0	-	-	NDM-1;OXA-232	CTX-M-15	aac(6')-Ib'.v1;aadA*;aadA2^	mcr-1.1^	-	-	-	-	-	sul1	tet(B).v2*;tetR*	-	dfrA12	OXA-9.v1;TEM-1D.v1^	-	SHV-1	-	OmpK35-76%	-	GyrA-83F;GyrA-87N;ParC-84K	KL51	K51	-	Typeable	99.98%	-	O3b	O3b	-	Typeable
479413	2017-04-15	Thailand	Rectal	ST16	no	no	SAMN54588224	ybt 9; ICEKp3	174-1LV	-	0	-	0	-	0	-	0	-	-	NDM-1;OXA-232	CTX-M-15	aadA*;aadA2^	-	-	-	-	-	-	sul1	tet(B).v2*;tetR*	-	dfrA12	OXA-9.v1	-	SHV-1	-	OmpK35-76%	-	GyrA-83F;GyrA-87N;ParC-84K	KL51	K51	?2	Typeable	99.98%	-	O3b	O3b	-	Typeable
479440	2017-04-15	Thailand	Human	ST4276	no	no	SAMN54588225	-	0	-	0	-	0	-	0	-	0	-	-	-	CTX-M-15	aac(3)-IIa.v1^;aac(6')-Ib-cr.v2;strA.v1^;strB.v1	-	-	qnrB1.v2^	-	-	-	sul2	tet(A).v1	-	dfrA14.v2*	OXA-1;TEM-1D.v1^	-	SHV-11^	35Q	OmpK35-7%	-	-	KL25	K25	!	Typeable	99.83%	-	O3/O3a	O3/O3a	-	Typeable
479477	2017-04-15	Thailand	Urine	ST16	no	no	SAMN54588226	ybt 9; ICEKp3	174	-	0	-	0	-	0	-	0	-	-	NDM-1;OXA-232	CTX-M-15	aadA*;aadA2^	-	-	-	-	-	-	sul1	tet(B).v2*;tetR*	-	dfrA12	OXA-9.v1	-	SHV-1	-	OmpK35-76%	-	GyrA-83F;GyrA-87N;ParC-84K	KL51	K51	-	Typeable	99.98%	-	O3b	O3b	-	Typeable
479495	2017-04-15	Thailand	Rectal	ST16	no	no	SAMN54588227	ybt 9; ICEKp3	174	-	0	-	0	-	0	-	0	-	-	NDM-1;OXA-232	CTX-M-15	aadA*;aadA2^	-	-	-	-	-	-	sul1	tet(B).v2*;tetR*	-	dfrA12	OXA-9.v1	-	SHV-1	-	OmpK35-76%	-	GyrA-83F;GyrA-87N;ParC-84K	KL51	K51	-	Typeable	99.98%	-	O3b	O3b	-	Typeable
479501	2017-04-15	Thailand	Rectal	ST16	no	no	SAMN54588228	ybt 9; ICEKp3	174	-	0	-	0	-	0	-	0	-	-	NDM-1;OXA-232	CTX-M-15	aadA*;aadA2^	-	-	-	-	-	-	sul1	tet(B).v2*;tetR*	-	dfrA12	OXA-9.v1	-	SHV-1	-	OmpK35-76%	-	GyrA-83F;GyrA-87N;ParC-84K	KL51	K51	?2	Typeable	99.98%	-	O3b	O3b	-	Typeable
479547	2017-04-15	Thailand	Rectal	ST16	no	no	SAMN54588229	ybt 9; ICEKp3	174	-	0	-	0	-	0	-	0	-	-	NDM-1;OXA-232	CTX-M-15	aadA*;aadA2^	-	-	-	-	-	-	sul1	tet(B).v2*;tetR*	-	dfrA12	OXA-9.v1	-	SHV-1	-	OmpK35-76%	-	GyrA-83F;GyrA-87N;ParC-84K	KL51	K51	-	Typeable	99.98%	-	O3b	O3b	-	Typeable
479565	2017-04-15	Thailand	Human	ST215	no	no	SAMN54588230	-	0	-	0	-	0	-	0	-	0	-	-	-	CTX-M-15	aac(3)-IIa.v1^;aac(6')-Ib-cr.v2;strA.v1^;strB.v1	-	-	qnrB1.v2^	-	-	-	sul2	tet(A).v1	-	dfrA14.v2*	OXA-1;TEM-1D.v1^	-	SHV-1	-	-	-	-	KL16	K16	-	Typeable	99.99%	-	O1/O2v1	O1ab	-	Typeable
479626	2017-04-15	Thailand	Respiratory	ST16	no	no	SAMN54588231	ybt 10; ICEKp4	91-2LV	-	0	-	0	-	0	-	0	-	-	OXA-181	CTX-M-15	aac(6')-Ib-cr.v2;aadA2^	-	-	qnrS1	Mrx;mphA	-	-	sul1	-	-	dfrA12	OXA-1;TEM-1D.v1^	-	SHV-1	-	-	-	GyrA-83F;GyrA-87N;ParC-84K	KL51	K51	-	Typeable	99.98%	-	O3b	O3b	-	Typeable
479653	2017-04-15	Thailand	Rectal	ST16	no	no	SAMN54588232	ybt 9; ICEKp3	174	-	0	-	0	-	0	-	0	-	-	NDM-1;OXA-232	CTX-M-15	aac(3)-IId^;aadA2^	-	-	-	Mrx;ermB.v1*;mphA	-	-	sul1	tet(B).v2*;tetR*	-	dfrA12	CMY-2.v2;OXA-9.v1	-	SHV-1	-	OmpK35-76%	-	GyrA-83F;GyrA-87N;ParC-84K	KL51	K51	-	Typeable	99.98%	-	O3b	O3b	-	Typeable
479662	2017-04-15	Thailand	Respiratory	ST15	no	no	SAMN54588233	ybt 10; ICEKp4	381	-	0	-	0	-	0	-	0	-	-	-	CTX-M-15	-	-	-	qnrB4	Mrx;mphA	-	arr-3	sul1	tet(A).v1	-	dfrA27	DHA-1;TEM-1D.v1^	-	SHV-28^	-	-	-	GyrA-83I;ParC-80I	KL28	K28	-	Typeable	99.84%	-	O1/O2v1	O1ab	-	Typeable
479741	2017-04-15	Thailand	Respiratory	ST16	no	no	SAMN54588234	ybt 9; ICEKp3	174	-	0	-	0	-	0	-	0	-	-	NDM-1;OXA-232	CTX-M-15	aadA*;aadA2^	-	-	-	-	-	-	sul1	tet(B).v2*;tetR*	-	dfrA12	OXA-9.v1	-	SHV-1	-	OmpK35-76%	-	GyrA-83F;GyrA-87N;ParC-84K	KL51	K51	-	Typeable	99.98%	-	O3b	O3b	-	Typeable
479750	2017-04-15	Thailand	Rectal	ST16	no	no	SAMN54588235	ybt 9; ICEKp3	174-1LV	-	0	-	0	-	0	-	0	-	-	NDM-1;OXA-232	CTX-M-15	aadA*;aadA2^	-	-	-	-	-	-	sul1	tet(B).v2*;tetR*	-	dfrA12	OXA-9.v1	-	SHV-1	-	OmpK35-76%	-	GyrA-83F;GyrA-87N;ParC-84K	KL51	K51	-	Typeable	99.98%	-	O3b	O3b	-	Typeable
479778	2017-04-15	Thailand	Respiratory	ST147	no	no	SAMN54588236	ybt 10; ICEKp4	78	-	0	-	0	-	0	-	0	-	-	-	CTX-M-15	aac(3)-IIa.v1^;aadA2^;aph3-Ia.v1^	-	-	qnrB6^	Mrx;ereA2*;mphA	cmlA5	arr-3	sul1	tet(A).v1	-	dfrA12;dfrA27	OXA-1	-	SHV-11^	35Q	-	-	GyrA-83Y;GyrA-87A;ParC-80I	KL10	K10	?3	Typeable	99.03%	-	O3/O3a	O3/O3a	?4	Typeable
480039	2017-04-15	Thailand	Respiratory	ST16	no	no	SAMN54588237	ybt 9; ICEKp3	174	-	0	-	0	-	0	-	0	-	-	NDM-1;OXA-232	CTX-M-15	aadA*;aadA2^	-	-	-	-	-	-	sul1	tet(B).v2*;tetR*	-	dfrA12	OXA-9.v1	-	SHV-1	-	OmpK35-76%	-	GyrA-83F;GyrA-87N;ParC-84K	KL51	K51	-	Typeable	100.00%	-	O3b	O3b	-	Typeable
480118	2017-04-15	Thailand	Urine	ST15	no	no	SAMN54588238	ybt 10; ICEKp4	17-1LV	-	0	-	0	-	0	-	0	-	-	-	CTX-M-15	aac(3)-IIa.v1^;aac(6')-Ib-cr.v2;strA.v1^;strB.v1	-	-	qnrB1.v2^	-	-	-	sul2	tet(A).v1	-	dfrA14.v2*	OXA-1*;TEM-1D.v1^	-	SHV-28^	-	-	-	GyrA-83F;GyrA-87A;ParC-80I	KL112	unknown (KL112)	-	Typeable	99.52%	-	O1/O2v1	O1ab	-	Typeable
480163	2017-04-15	Thailand	Blood	ST16	no	no	SAMN54588239	ybt 9; ICEKp3	174	-	0	-	0	-	0	-	0	-	-	NDM-1;OXA-232	CTX-M-15	aadA*;aadA2^	-	-	-	-	-	-	sul1	tet(B).v2*;tetR*	-	dfrA12	OXA-9.v1	-	SHV-1	-	OmpK35-76%	-	GyrA-83F;GyrA-87N;ParC-84K	KL51	K51	-	Typeable	99.98%	-	O3b	O3b	-	Typeable
480215	2017-04-15	Thailand	Rectal	ST16	no	no	SAMN54588240	ybt 9; ICEKp3 (truncated)	174-1LV	-	0	-	0	-	0	-	0	-	-	NDM-1;OXA-232	CTX-M-15	aac(3)-IId^;aadA2^	-	-	-	Mrx;ermB.v1*;mphA	-	-	sul1	tet(B).v2*;tetR*	-	dfrA12	CMY-2.v2;OXA-9.v1	-	SHV-1	-	OmpK35-76%	-	GyrA-83F;GyrA-87N;ParC-84K	KL51	K51	?2	Typeable	99.98%	-	O3b	O3b	-	Typeable
480303	2017-04-15	Thailand	Rectal	ST16	no	no	SAMN54588241	ybt 9; ICEKp3	174	-	0	-	0	-	0	-	0	-	-	NDM-1;OXA-232	CTX-M-15	aadA*;aadA2^	-	-	-	-	-	-	sul1	tet(B).v2*;tetR*	-	dfrA12	OXA-9.v1	-	SHV-1	-	OmpK35-76%	-	GyrA-83F;GyrA-87N;ParC-84K	KL51	K51	?2	Typeable	99.98%	-	O3b	O3b	-	Typeable
480349	2017-04-15	Thailand	Urine	ST15	no	no	SAMN54588242	-	0	-	0	-	0	-	0	-	0	-	-	-	CTX-M-15	aadA16*	-	-	qnrB6^	Mrx;mphA	-	-	sul1;sul2	tet(A).v1	-	-	TEM-1D.v1^	-	-	-	-	-	GyrA-83F;GyrA-87A;ParC-80I	KL24	K24	?2!	Typeable	99.20%	-	O1/O2v1	O1ab	-	Typeable
480358	2017-04-15	Thailand	Rectal	ST16	no	no	SAMN54588243	ybt 9; ICEKp3	174	-	0	-	0	-	0	-	0	-	-	NDM-1;OXA-232	CTX-M-15	aadA*;aadA2^	-	-	-	-	-	-	sul1	tet(B).v2*;tetR*	-	dfrA12	OXA-9.v1	-	SHV-1	-	OmpK35-76%	-	GyrA-83F;GyrA-87N;ParC-84K	KL51	K51	-	Typeable	99.98%	-	O3b	O3b	-	Typeable
480367	2017-04-15	Thailand	Wound	ST16	no	no	SAMN54588244	ybt 9; ICEKp3	174	-	0	-	0	-	0	-	0	-	-	NDM-1;OXA-232	CTX-M-15	aadA*;aadA2^	-	-	-	-	-	-	sul1	tet(B).v2*;tetR*	-	dfrA12	OXA-9.v1	-	SHV-1	-	OmpK35-76%	-	GyrA-83F;GyrA-87N;ParC-84K	KL51	K51	-	Typeable	99.98%	-	O3b	O3b	-	Typeable
480394	2017-04-15	Thailand	Rectal	ST16	no	no	SAMN54588245	ybt 9; ICEKp3	174	-	0	-	0	-	0	-	0	-	-	NDM-1;OXA-232	CTX-M-15	aadA*;aadA2^	-	-	-	-	-	-	sul1	tet(B).v2*;tetR*	-	dfrA12	OXA-9.v1	-	SHV-1	-	OmpK35-76%	-	GyrA-83F;GyrA-87N;ParC-84K	KL51	K51	-	Typeable	99.98%	-	O3b	O3b	-	Typeable
480400	2017-04-15	Thailand	Rectal	ST16	no	no	SAMN54588246	ybt 9; ICEKp3	174	-	0	-	0	-	0	-	0	-	-	NDM-1; OXA-232	CTX-M-15	aadA*;aadA2^	-	-	-	-	-	-	sul1	tet(B).v2*;tetR*	-	dfrA12	OXA-9.v1	-	SHV-1	-	OmpK35-76%	-	GyrA-83F;GyrA-87N;ParC-84K	KL51	K51	-	Typeable	99.98%	-	O3b	O3b	-	Typeable
480428	2017-04-15	Thailand	Urine	ST16	no	no	SAMN54588247	ybt 9; ICEKp3 (truncated)	174-2LV	-	0	-	0	-	0	-	0	-	-	NDM-1;OXA-232	CTX-M-15	aadA*;aadA2^	-	-	-	-	-	-	sul1	tet(B).v2*;tetR*	-	dfrA12	OXA-9.v1	-	SHV-1	-	OmpK35-76%	-	GyrA-83F;GyrA-87N;ParC-84K	KL51	K51	?2+	Typeable	99.98%	-	O3b	O3b	-	Typeable
480446	2017-04-15	Thailand	Urine	ST16	no	no	SAMN54588248	ybt 9; ICEKp3 (truncated)	174-1LV	-	0	-	0	-	0	-	0	-	-	NDM-1;OXA-232	CTX-M-15	aadA*;aadA2^	-	-	-	-	-	-	sul1	tet(B).v2*;tetR*	-	dfrA12	OXA-9.v1	-	SHV-1	-	OmpK35-76%	-	GyrA-83F;GyrA-87N;ParC-84K	KL51	K51	!	Typeable	99.97%	-	O3b	O3b	-	Typeable
480455	2017-04-15	Thailand	Respiratory	ST16	no	no	SAMN54588249	ybt 9; ICEKp3	174	-	0	-	0	-	0	-	0	-	-	NDM-1;OXA-232	CTX-M-15	aadA*;aadA2^	-	-	-	-	-	-	sul1	tet(B).v2*;tetR*	-	dfrA12	OXA-9.v1	-	SHV-1	-	OmpK35-76%	-	GyrA-83F;GyrA-87N;ParC-84K	KL51	K51	-	Typeable	99.98%	-	O3b	O3b	-	Typeable
480464	2017-04-15	Thailand	Urine	ST742	no	no	SAMN54588250	-	0	-	0	-	0	-	0	-	0	-	-	-	CTX-M-173	aac(6')-Ib-cr.v2;strA.v1^;strB.v1	-	-	qnrB1.v2^	-	-	-	sul2	tet(A).v1	-	dfrA14.v2*	OXA-1;TEM-1D.v1^	-	SHV-11^	35Q	-	-	-	KL51	K51	-	Typeable	100.00%	-	O3b	O3b	-	Typeable
480507	2017-04-15	Thailand	Blood	ST307	no	no	SAMN54588251	-	0	-	0	-	0	-	0	-	0	-	-	-	CTX-M-15	aac(3)-IIa.v1^;aac(6')-Ib-cr.v2;strA.v1^;strB.v1	-	-	qnrB1.v2^	-	-	-	sul2	tet(A).v1	-	dfrA14.v2*	OXA-1;TEM-1D.v1^	-	SHV-28^	-	-	-	GyrA-83I;ParC-80I	KL102	unknown (KL102)	-	Typeable	99.66%	-	O1/O2v2	O1ab	-	Typeable
480516	2017-04-15	Thailand	Urine	ST16	no	no	SAMN54588252	ybt 9; ICEKp3	174	-	0	-	0	-	0	-	0	-	-	NDM-1;OXA-232	CTX-M-15	aadA*;aadA2^	-	-	-	-	-	-	sul1	tet(B).v2*;tetR*	-	dfrA12	OXA-9.v1	-	SHV-1	-	OmpK35-76%	-	GyrA-83F;GyrA-87N;ParC-84K	KL51	K51	-	Typeable	99.97%	-	O3b	O3b	-	Typeable
480738	2017-05-29	Thailand	Respiratory	ST45	yes	yes	SAMN54588253	ybt 10; ICEKp4	78	-	0	iuc 3	32-1LV	-	0	-	0	-	-	-	CTX-M-55	aac(3)-IIa.v1^;strA.v1^;strB.v1	mcr-1.1^	-	qnrS1	-	floR.v2*	-	sul2	tet(A).v1*?	-	-	TEM-1D.v1^	-	SHV-1	-	-	-	-	KL7	K7	-	Typeable	99.52%	-	O1/O2v2	O2afg	-	Typeable
483595	2017-04-15	Thailand	Respiratory	ST16	no	no	SAMN54588254	ybt 9; ICEKp3	174	-	0	-	0	-	0	-	0	-	-	NDM-1;OXA-232	CTX-M-15	aadA*;aadA2^	-	-	-	-	-	-	sul1	tet(B).v2*;tetR*	-	dfrA12	OXA-9.v1	-	SHV-1	-	OmpK35-76%	-	GyrA-83F;GyrA-87N;ParC-84K	KL51	K51	?2	Typeable	99.98%	-	O3b	O3b	-	Typeable
483610	2017-04-15	Thailand	Respiratory	ST16	no	no	SAMN54588255	ybt 9; ICEKp3	174	-	0	-	0	-	0	-	0	-	-	NDM-1;OXA-232	CTX-M-15	aadA*;aadA2^	-	-	-	-	-	-	sul1	tet(B).v2*;tetR*	-	dfrA12	OXA-9.v1	-	SHV-1	-	OmpK35-76%	-	GyrA-83F;GyrA-87N;ParC-84K	KL51	K51	?2	Typeable	99.98%	-	O3b	O3b	-	Typeable
483683	2017-04-15	Thailand	Urine	ST16	no	no	SAMN54588256	ybt 9; ICEKp3	174-1LV	-	0	-	0	-	0	-	0	-	-	NDM-1;OXA-232	CTX-M-15	aadA*;aadA2^	-	-	-	-	-	-	sul1	tet(B).v2*;tetR*	-	dfrA12	OXA-9.v1	-	SHV-1	-	OmpK35-76%	-	GyrA-83F;GyrA-87N;ParC-84K	KL51	K51	?2	Typeable	99.98%	-	O3b	O3b	-	Typeable
483692	2017-04-15	Thailand	Respiratory	ST16	no	no	SAMN54588257	ybt 9; ICEKp3	174	-	0	-	0	-	0	-	0	-	-	NDM-1;OXA-232	CTX-M-15	aadA*;aadA2^	-	-	-	-	-	-	sul1	tet(B).v2*;tetR*	-	dfrA12	OXA-9.v1	-	SHV-1	-	OmpK35-76%	-	GyrA-83F;GyrA-87N;ParC-84K	KL51	K51	?2	Typeable	99.98%	-	O3b	O3b	-	Typeable
580153	2017-04-23	Thailand	Urine	ST16	no	no	SAMN54588530	ybt 9; ICEKp3	174	-	0	-	0	-	0	-	0	-	-	NDM-1;OXA-232	CTX-M-15	aac(3)-IId^;aadA2^	-	-	-	Mrx;ermB.v1*;mphA	-	-	sul1	tet(B).v2*;tetR*	-	dfrA12	CMY-2.v2;OXA-9.v1	-	SHV-1	-	OmpK35-76%	-	GyrA-83F;GyrA-87N;ParC-84K	KL51	K51	-	Typeable	99.98%	-	O3b	O3b	-	Typeable
580199	2017-04-22	Thailand	Respiratory	ST16	no	no	SAMN54588531	ybt 9; ICEKp3	174	-	0	-	0	-	0	-	0	-	-	NDM-1;OXA-232	CTX-M-15	aadA*;aadA2^	-	-	-	-	-	-	sul1	tet(B).v2*;tetR*	-	dfrA12	OXA-9.v1	-	SHV-1	-	OmpK35-76%	-	GyrA-83F;GyrA-87N;ParC-84K	KL51	K51	-	Typeable	99.98%	-	O3b	O3b	-	Typeable
580232	2018-07-13	Thailand	Respiratory	ST16	no	no	SAMN54588532	ybt 9; ICEKp3	174	-	0	-	0	-	0	-	0	-	-	NDM-1;OXA-232	CTX-M-15	aac(3)-IId^	-	-	-	Mrx;ermB.v1*;mphA	-	-	sul1	tet(B).v2*;tetR*	-	dfrA12	CMY-2.v2	-	SHV-1	-	OmpK35-76%	-	GyrA-83F;GyrA-87N;ParC-84K	KL51	K51	-	Typeable	99.98%	-	O3b	O3b	-	Typeable
580296	2017-05-02	Thailand	Urine	ST37	no	no	SAMN54588533	-	0	-	0	-	0	-	0	-	0	-	-	-	-	aac(3)-IIa.v1^;strA.v1^;strB.v1	-	-	-	Mrx;mphA*	-	-	sul2*	tet(A).v1	-	dfrA14.v2*	TEM-1D.v1^	-	SHV-11^	35Q	-	-	-	KL15	K15	-	Typeable	99.84%	-	O4	O4	-	Typeable
580320	2018-07-13	Thailand	Respiratory	ST15	no	no	SAMN54588534	ybt 10; ICEKp4	381	-	0	-	0	-	0	-	0	-	-	-	CTX-M-15;SHV-2-like	aac(6')-Ib-cr.v2;aadA16*	-	-	qnrB4	Mrx;mphA	-	arr-3	sul1	tet(A).v1	-	dfrA27	DHA-1;TEM-1D.v1^	-	-	238S	-	-	GyrA-83I;ParC-80I	KL28	K28	-	Typeable	99.84%	-	O1/O2v1	O1ab	-	Typeable
580418	2017-08-02	Thailand	Urine	ST16	no	no	SAMN54588535	ybt 9; ICEKp3	174	-	0	-	0	-	0	-	0	-	-	NDM-1;OXA-232	CTX-M-15	aadA*;aadA2^	-	-	-	-	-	-	sul1	tet(B).v2*;tetR*	-	dfrA12	OXA-9.v1	-	SHV-1	-	OmpK35-76%	-	GyrA-83F;GyrA-87N;ParC-84K	KL51	K51	?2	Typeable	99.98%	-	O3b	O3b	?2	Typeable
580427	2017-08-02	Thailand	Urine	ST17	no	no	SAMN54588536	ybt 15; ICEKp11	273-2LV	-	0	-	0	-	0	-	0	-	-	-	-	aph3-Ia.v1;strA.v1^;strB.v1	-	-	qnrB1.v2^	-	-	-	sul2*	tet(A).v1	-	dfrA14.v2*	-	-	SHV-11^	35Q	-	-	-	KL127	unknown (KL127)	?5	Typeable	100.00%	-	OL13	O13	?7!	Typeable
580463	2017-08-02	Thailand	Respiratory	ST20	no	no	SAMN54588537	-	0	-	0	-	0	-	0	-	0	-	-	-	-	-	-	-	-	-	-	-	-	-	-	-	-	-	SHV-187	-	-	-	-	KL55	K55	?3!	Typeable	97.80%	-	O1/O2v2	O1ab	-	Typeable
580472	2017-08-02	Thailand	Respiratory	ST16	no	no	SAMN54588538	ybt 9; ICEKp3	174	-	0	-	0	-	0	-	0	-	-	NDM-1;OXA-232	CTX-M-15	aac(3)-IId^	-	-	-	Mrx;ermB.v1*;mphA	-	-	sul1	tet(B).v2*;tetR*	-	dfrA12	CMY-2.v2;OXA-9.v1	-	SHV-1	-	OmpK35-76%	-	GyrA-83F;GyrA-87N;ParC-84K	KL51	K51	-	Typeable	99.98%	-	O3b	O3b	-	Typeable
580524	2017-08-02	Thailand	Respiratory	ST15	no	no	SAMN54588539	ybt 10; ICEKp4	381	-	0	-	0	-	0	-	0	-	-	-	CTX-M-15	aac(6')-Ib-cr.v2;aadA16*	-	-	qnrB4	Mrx;mphA	-	arr-3	sul1	tet(A).v1	-	dfrA27	DHA-1;TEM-1D.v1^	-	-	-	-	-	GyrA-83I;ParC-80I	KL28	K28	-	Typeable	99.84%	-	O1/O2v1	O1ab	-	Typeable
580542	2017-08-02	Thailand	Respiratory	ST16	no	no	SAMN54588540	ybt 9; ICEKp3	174	-	0	-	0	-	0	-	0	-	-	NDM-1;OXA-232	CTX-M-15	aac(3)-IId^	-	-	-	Mrx;ermB.v1*;mphA	-	-	sul1	tet(B).v2*;tetR*	-	dfrA12	CMY-2.v2;OXA-9.v1	-	SHV-1	-	OmpK35-76%	-	GyrA-83F;GyrA-87N;ParC-84K	KL51	K51	-	Typeable	99.98%	-	O3b	O3b	-	Typeable
580685	2017-08-02	Thailand	Urine	ST307	no	no	SAMN54588541	-	0	-	0	-	0	-	0	-	0	-	-	-	CTX-M-15	aac(3)-IIa.v1^;aac(6')-Ib-cr.v2;strA.v1^;strB.v1	-	-	qnrB1.v2^	-	-	-	sul2	tet(A).v1	-	dfrA14.v2*	OXA-1;TEM-1D.v1^	-	SHV-28^	-	-	-	GyrA-83I;ParC-80I	KL102	unknown (KL102)	-	Typeable	99.66%	-	O1/O2v2	O2afg	-	Typeable
580719	2017-08-02	Thailand	Respiratory	ST336	no	no	SAMN54588542	ybt 15; ICEKp11	230-1LV	-	0	-	0	-	0	-	0	-	-	-	CTX-M-15;SHV-12	aac(3)-IId*;strA.v1^;strB.v1	-	-	qnrB1.v2^	ermB.v1*	-	-	sul2*	-	-	dfrA14.v2*	-	-	-	-	-	-	-	KL25	K25	!	Typeable	99.64%	-	O5	O5	-	Typeable
580728	2017-08-02	Thailand	Respiratory	ST16	no	no	SAMN54588543	ybt 9; ICEKp3 (truncated)	174-1LV	-	0	-	0	-	0	-	0	-	-	NDM-1;OXA-232	CTX-M-15	aadA*;aadA2^	-	-	-	-	-	-	sul1	tet(B).v2*;tetR*	-	dfrA12	OXA-9.v1	-	SHV-1	-	OmpK35-76%	-	GyrA-83F;GyrA-87N;ParC-84K	KL51	K51	-	Typeable	99.98%	-	O3b	O3b	-	Typeable
580737	2017-08-02	Thailand	Respiratory	ST4869	no	no	SAMN54588544	-	0	-	0	-	0	-	0	-	0	-	-	-	CTX-M-15	aac(3)-IIa.v1^	-	-	-	-	-	-	-	tet(B).v2*;tetR	-	-	-	-	SHV-1^	-	-	-	-	KL9	K9	-	Typeable	99.99%	-	O1/O2v2	O2afg	-	Typeable
580746	2017-08-02	Thailand	Blood	ST147	no	no	SAMN54588545	ybt 10; ICEKp4	78	-	0	-	0	-	0	-	0	-	-	-	CTX-M-15	aac(3)-IIa.v1^	-	-	-	ereA2*	cmlA5	arr-2	sul1	-	-	-	OXA-1	-	SHV-11^	35Q	-	-	GyrA-83Y;GyrA-87A;ParC-80I	KL10	K10	?3	Typeable	99.00%	-	O3/O3a	O3/O3a	?4	Typeable
580807	2017-08-02	Thailand	Urine	ST307	no	no	SAMN54588546	-	0	-	0	-	0	-	0	-	0	-	-	-	CTX-M-15	aac(3)-IIa.v1^;aac(6')-Ib-cr.v2;strA.v1^;strB.v1	-	-	qnrB1.v2^	-	-	-	sul2	tet(A).v1	-	dfrA14.v2*	OXA-1;TEM-1D.v1^	-	SHV-28^	-	-	-	GyrA-83I;ParC-80I	KL102	unknown (KL102)	-	Typeable	99.66%	-	O1/O2v2	O2afg	-	Typeable
580816	2017-08-02	Thailand	Respiratory	ST16	no	no	SAMN54588547	ybt 9; ICEKp3	174	-	0	-	0	-	0	-	0	-	-	NDM-1;OXA-232	CTX-M-15	aac(3)-IId^	-	-	-	Mrx;ermB.v1*;mphA	-	-	sul1	tet(B).v2*;tetR*	-	dfrA12	CMY-2.v2;OXA-9.v1	-	SHV-1	-	OmpK35-76%	-	GyrA-83F;GyrA-87N;ParC-84K	KL51	K51	-	Typeable	99.98%	-	O3b	O3b	-	Typeable
580825	2017-08-02	Thailand	Urine	ST307	no	no	SAMN54588548	-	0	-	0	-	0	-	0	-	0	-	-	-	CTX-M-15	aac(3)-IIa.v1^;aac(6')-Ib-cr.v2;strA.v1^;strB.v1	-	-	qnrB1.v2^	-	-	-	sul2	tet(A).v1	-	dfrA14.v2*	OXA-1;TEM-1D.v1^	-	SHV-28^	-	-	-	GyrA-83I;ParC-80I	KL102	unknown (KL102)	-	Typeable	99.66%	-	O1/O2v2	O2afg	-	Typeable
580940	2017-08-02	Thailand	Urine	ST11	no	no	SAMN54588549	ybt 9; ICEKp3 (truncated)	183-1LV	-	0	-	0	-	0	-	0	-	-	NDM-5;OXA-232	CTX-M-15	aac(3)-IIa.v1^;aac(6')-Ib-cr.v2;aadA2^;aph3-Ia.v1^	-	-	qnrS1	-	-	-	sul1;sul2	tet(A).v1;tet(D)	-	dfrA12	LAP-2;OXA-1	-	SHV-11	35Q	-	-	GyrA-83I;ParC-80I	KL15	K15	-	Typeable	99.92%	-	O4	O4	-	Typeable
580968	2017-08-02	Thailand	Blood	ST4869	no	no	SAMN54588550	-	0	-	0	-	0	-	0	-	0	-	-	-	CTX-M-15	aac(3)-IIa.v1^	-	-	-	-	-	-	-	tet(B).v2*;tetR	-	-	-	-	SHV-1^	-	-	-	-	KL9	K9	-	Typeable	99.99%	-	O1/O2v2	O2afg	-	Typeable
580977	2017-08-02	Thailand	Respiratory	ST45	yes	no	SAMN54588551	ybt 10; ICEKp4	78	-	0	iuc 3	32-1LV	-	0	-	0	-	-	-	CTX-M-55	aac(3)-IIa.v1^;strA.v1^;strB.v1	mcr-1.1^	-	qnrS1	-	floR.v2*	-	sul2	tet(A).v1*?	-	-	TEM-1D.v1^	-	SHV-1	-	-	-	-	KL7	K7	-	Typeable	99.53%	-	O1/O2v2	O2afg	-	Typeable
580995	2017-08-02	Thailand	Urine	ST22	no	no	SAMN54588552	-	0	-	0	-	0	-	0	-	0	-	-	-	CTX-M-15	aac(6')-Ib-cr.v2;strA.v1^;strB.v1	-	-	qnrB1.v2^	-	-	-	sul2	tet(A).v1	-	dfrA14.v2*	OXA-1;TEM-1D.v1^	-	SHV-1^	-	-	-	-	KL9	K9	-	Typeable	99.99%	-	O1/O2v2	O2afg	-	Typeable
581019	2017-08-02	Thailand	Respiratory	ST16	no	no	SAMN54588553	ybt 9; ICEKp3	174	-	0	-	0	-	0	-	0	-	-	NDM-1; OXA-232	CTX-M-15	aadA*;aadA2^	-	-	-	-	-	-	sul1	tet(B).v2*;tetR*	-	dfrA12	OXA-9.v1	-	SHV-1	-	OmpK35-76%	-	GyrA-83F;GyrA-87N;ParC-84K	KL51	K51	-	Typeable	99.98%	-	O3b	O3b	-	Typeable
581028	2017-08-02	Thailand	Urine	ST580	no	no	SAMN54588554	-	0	-	0	-	0	-	0	-	0	-	-	-	-	aac(3)-IId^;aac(6')-Ib-cr.v2^;aadA17*;aph3-Ia.v1^;strA.v1*;strB.v1*	-	-	qnrB4	Mrx;lnuF.v1;mphA	catB3.v2;catII.2*;floR.v2*?	arr-3	sul1;sul2	-	-	dfrA14.v2*	DHA-1;OXA-1;TEM-1D.v1^	-	SHV-11^	35Q	-	-	GyrA-83I;ParC-80I	KL106	unknown (KL106)	?2+!	Typeable	99.89%	-	O1/O2v2	O1ab	-	Typeable
581046	2017-08-02	Thailand	Blood	ST147	no	no	SAMN54588555	ybt 10; ICEKp4	78	-	0	-	0	-	0	-	0	-	-	-	CTX-M-15	aac(3)-IIa.v1^	-	-	-	ereA2*	cmlA5	arr-2	sul1	-	-	-	OXA-1	-	SHV-11^	35Q	-	-	GyrA-83Y;GyrA-87A;ParC-80I	KL10	K10	?3	Typeable	99.00%	-	O3/O3a	O3/O3a	?4	Typeable
581082	2017-08-02	Thailand	Urine	ST15	no	no	SAMN54588556	ybt 10; ICEKp4	17-1LV	-	0	-	0	-	0	-	0	-	-	-	CTX-M-15	aac(3)-IIa.v1^;aac(6')-Ib-cr.v2;strA.v1^;strB.v1	-	-	qnrB1.v2^	-	-	-	sul2	tet(A).v1	-	dfrA14.v2*	OXA-1*;TEM-1D.v1^	-	SHV-28^	-	-	-	GyrA-83F;GyrA-87A;ParC-80I	KL112	unknown (KL112)	-	Typeable	99.52%	-	O1/O2v1	O1ab	-	Typeable
581107	2017-08-02	Thailand	Respiratory	ST16	no	no	SAMN54588557	ybt 9; ICEKp3	174	-	0	-	0	-	0	-	0	-	-	NDM-1;OXA-232	CTX-M-15	aac(3)-IId^;aadA2^	-	-	-	Mrx;ermB.v1*;mphA	-	-	sul1	tet(B).v2*;tetR*	-	dfrA12	CMY-2.v2;OXA-9.v1	-	SHV-1	-	OmpK35-76%	-	GyrA-83F;GyrA-87N;ParC-84K	KL51	K51	-	Typeable	99.98%	-	O3b	O3b	-	Typeable
581134	2017-08-02	Thailand	Urine	ST16	no	no	SAMN54588558	ybt 9; ICEKp3	174	-	0	-	0	-	0	-	0	-	-	OXA-232	CTX-M-15	aadA*	-	-	-	-	-	-	-	tet(B).v2*;tetR*	-	-	OXA-9.v1	-	SHV-1	-	OmpK35-76%	-	GyrA-83F;GyrA-87N;ParC-84K	KL51	K51	-	Typeable	99.97%	-	O3b	O3b	-	Typeable
581152	2017-08-02	Thailand	Urine	ST6701	no	no	SAMN54588559	-	0	-	0	-	0	-	0	-	0	-	-	-	-	-	-	-	-	-	-	-	-	-	-	-	-	-	SHV-1^	-	-	-	-	KL8	K8	-	Typeable	99.87%	-	O1/O2v1	O2a	-	Typeable
581161	2017-08-02	Thailand	Respiratory	ST16	no	no	SAMN54588560	ybt 9; ICEKp3	174	-	0	-	0	-	0	-	0	-	-	NDM-1;OXA-232	CTX-M-15	aadA*;aadA2^	-	-	-	-	-	-	sul1	tet(B).v2*;tetR*	-	dfrA12	OXA-9.v1	-	SHV-1	-	OmpK35-76%	-	GyrA-83F;GyrA-87N;ParC-84K	KL51	K51	-	Typeable	99.98%	-	O3b	O3b	-	Typeable
581347	2017-09-06	Thailand	Respiratory	ST29	no	no	SAMN54588561	ybt 14; ICEKp5	327	-	0	-	0	-	0	-	0	-	-	-	-	-	-	-	qnrS1	Mrx;mphA	-	-	-	-	-	-	-	-	-	-	OmpK36-9%	-	-	KL30	K30	?3	Typeable	97.23%	-	O1/O2v2	O1ab	-	Typeable
581523	2017-09-14	Thailand	Urine	ST16	no	no	SAMN54588562	ybt 9; ICEKp3	174	-	0	-	0	-	0	-	0	-	-	NDM-1	CTX-M-15	-	-	-	-	-	-	-	sul1	tet(B).v2*;tetR*	-	dfrA12	CMY-2.v2	-	SHV-1	-	OmpK35-76%	-	GyrA-83F;GyrA-87N;ParC-84K	KL51	K51	-	Typeable	99.98%	-	O3b	O3b	-	Typeable
581541	2017-09-13	Thailand	Urine	ST15	no	no	SAMN54588563	-	0	-	0	-	0	-	0	-	0	-	-	-	CTX-M-15	aac(3)-IIa.v1^;aac(6')-Ib-cr.v2;strA.v1^;strB.v1	-	-	qnrB1.v2^	-	-	-	sul2	tet(A).v1	-	dfrA14.v2*	OXA-1*;TEM-1D.v1^	-	SHV-28^	-	-	-	GyrA-83F;GyrA-87A;ParC-80I	KL112	unknown (KL112)	-	Typeable	99.53%	-	O1/O2v1	O1ab	-	Typeable
581611	2017-09-09	Thailand	Urine	ST273	no	no	SAMN54588564	-	0	-	0	-	0	-	0	-	0	-	-	-	CTX-M-65	aac(3)-IId^;strA.v1*;strB.v1*	-	-	qnrS1	-	floR.v1*	arr-3	sul1;sul2	tet(A).v1*	-	dfrA27	-	-	SHV-11^	35Q	-	-	GyrA-83I;ParC-80I	KL61	K61	-	Typeable	98.31%	-	O1/O2v1	O2a	-	Typeable
581639	2017-09-15	Thailand	Urine	ST16	no	no	SAMN54588565	ybt 9; ICEKp3	174	-	0	-	0	-	0	-	0	-	-	-	CTX-M-15	-	-	-	qnrB6^	Mrx;mphA	-	arr-3	sul1	tet(A).v1	-	dfrA27	-	-	SHV-1	-	-	-	GyrA-83F;GyrA-87N;ParC-84K	KL51	K51	-	Typeable	99.98%	-	O3b	O3b	-	Typeable
581718	2017-08-27	Thailand	Fluid	ST307	no	no	SAMN54588566	-	0	-	0	-	0	-	0	-	0	-	-	-	CTX-M-15;CTX-M-63	aac(3)-IIa.v1^;aac(6')-Ib-cr.v2;strA.v1^;strB.v1	-	-	qnrB1.v2^;qnrS1	-	-	-	sul2	tet(A).v1	-	dfrA14.v2*	LAP-2;OXA-1;TEM-1D.v1^	-	SHV-28^	-	-	-	GyrA-83I;ParC-80I	KL102	unknown (KL102)	-	Typeable	99.66%	-	O1/O2v2	O2afg	-	Typeable
581754	2018-01-21	Thailand	Respiratory	ST16	no	no	SAMN54588568	ybt 9; ICEKp3	174	-	0	-	0	-	0	-	0	-	-	NDM-1;OXA-232	CTX-M-15	aadA*;aadA2^	-	-	-	-	-	-	sul1	tet(B).v2*;tetR*	-	dfrA12	OXA-9.v1	-	SHV-1	-	OmpK35-76%	-	GyrA-83F;GyrA-87N;ParC-84K	KL51	K51	-	Typeable	99.98%	-	O3b	O3b	-	Typeable
581790	2018-01-10	Thailand	Fluid	ST16	no	no	SAMN54588569	ybt 9; ICEKp3	174	-	0	-	0	-	0	-	0	-	-	NDM-1;OXA-232	CTX-M-15	aadA*;aadA2^	-	-	-	-	-	-	-	tet(B).v2*;tetR*	-	dfrA12	OXA-9.v1	-	SHV-1	-	OmpK35-76%	-	GyrA-83F;GyrA-87N;ParC-84K	KL51	K51	-	Typeable	100.00%	-	O3b	O3b	-	Typeable
581806	2018-01-13	Thailand	Urine	ST16	no	no	SAMN54588570	ybt 9; ICEKp3	174-1LV	-	0	-	0	-	0	-	0	-	-	OXA-232	CTX-M-15	-	-	-	-	-	-	-	-	tet(B).v2*;tetR*	-	-	-	-	SHV-1	-	OmpK35-76%	-	GyrA-83F;GyrA-87N;ParC-84K	KL51	K51	-	Typeable	99.98%	-	O3b	O3b	-	Typeable
581815	2018-01-13	Thailand	Respiratory	ST16	no	no	SAMN54588571	ybt 9; ICEKp3	174	-	0	-	0	-	0	-	0	-	-	NDM-1;OXA-232	CTX-M-15	aadA*;aadA2^	-	-	-	-	-	-	sul1	tet(B).v2*;tetR*	-	dfrA12	OXA-9.v1	-	SHV-1	-	OmpK35-76%	-	GyrA-83F;GyrA-87N;ParC-84K	KL51	K51	-	Typeable	99.98%	-	O3b	O3b	-	Typeable
581949	2017-08-23	Thailand	Urine	ST16	no	no	SAMN54588572	ybt 9; ICEKp3	174	-	0	-	0	-	0	-	0	-	-	NDM-1;OXA-232	CTX-M-15	aadA*;aadA2^	-	-	-	-	-	-	sul1	tet(B).v2*;tetR*	-	dfrA12	OXA-9.v1	-	SHV-1	-	OmpK35-76%	-	GyrA-83F;GyrA-87N;ParC-84K	KL51	K51	-	Typeable	99.98%	-	O3b	O3b	-	Typeable
582009	2017-09-01	Thailand	Respiratory	ST16	no	no	SAMN54588573	ybt 9; ICEKp3	174	-	0	-	0	-	0	-	0	-	-	NDM-1;OXA-232	CTX-M-15	aadA*;aadA2^	-	-	-	-	-	-	sul1	tet(B).v2*;tetR*	-	dfrA12	OXA-9.v1	-	SHV-1	-	OmpK35-76%	-	GyrA-83F;GyrA-87N;ParC-84K	KL51	K51	-	Typeable	99.98%	-	O3b	O3b	-	Typeable
582081	2017-09-21	Thailand	Human	ST11	no	no	SAMN54588574	ybt 9; ICEKp3 (truncated)	183-3LV	-	0	-	0	-	0	-	0	-	-	-	CTX-M-15	aac(3)-IIa.v1^;aac(6')-Ib-cr.v2;aadA2^;aph3-Ia.v1^	-	-	qnrS1	Mrx;mphA	-	-	sul1;sul2	tet(A).v1	-	dfrA12	LAP-2;OXA-1	-	SHV-11	35Q	-	MgrB-0%	GyrA-83I;ParC-80I	KL15	K15	?2	Typeable	99.91%	-	O4	O4	!	Typeable
582090	2017-10-02	Thailand	Urine	ST16	no	no	SAMN54588575	ybt 9; ICEKp3	174	-	0	-	0	-	0	-	0	-	-	NDM-1;OXA-232	CTX-M-15	aadA*;aadA2^	-	-	-	-	-	-	sul1	tet(B).v2*;tetR*	-	dfrA12	OXA-9.v1	-	SHV-1	-	OmpK35-76%	-	GyrA-83F;GyrA-87N;ParC-84K	KL51	K51	?2	Typeable	99.98%	-	O3b	O3b	-	Typeable
582115	2017-11-03	Thailand	Device	ST16	no	no	SAMN54588576	ybt 9; ICEKp3	174	-	0	-	0	-	0	-	0	-	-	NDM-1;OXA-232	CTX-M-15	aadA*;aadA2^	-	-	-	-	-	-	sul1	tet(B).v2*;tetR*	-	dfrA12	OXA-9.v1	-	SHV-1	-	OmpK35-76%;OmpK36-85%	-	GyrA-83F;GyrA-87N;ParC-84K	KL51	K51	-	Typeable	99.98%	-	O3b	O3b	-	Typeable
582230	2017-09-24	Thailand	Respiratory	ST273	no	no	SAMN54588577	-	0	-	0	-	0	-	0	-	0	-	-	-	CTX-M-65	aac(3)-IId^;strA.v1*;strB.v1*	-	-	qnrS1	-	floR.v1*	arr-3	sul1;sul2	tet(A).v1*	-	dfrA27	-	-	SHV-11^	35Q	-	-	GyrA-83I;ParC-80I	KL61	K61	-	Typeable	98.31%	-	O1/O2v1	O2a	-	Typeable
582267	2017-09-23	Thailand	Respiratory	ST16	no	no	SAMN54588578	ybt 9; ICEKp3	174	-	0	-	0	-	0	-	0	-	-	NDM-1;OXA-232?	CTX-M-15	aadA*;aadA2^	-	-	-	-	-	-	sul1	tet(B).v2*;tetR*	-	dfrA12	OXA-9.v1	-	SHV-1	-	OmpK35-76%	-	GyrA-83F;GyrA-87N;ParC-84K	KL51	K51	-	Typeable	100.00%	-	O3b	O3b	-	Typeable
582276	2017-09-21	Thailand	Stool	ST16	no	no	SAMN54588579	ybt 9; ICEKp3	174	-	0	-	0	-	0	-	0	-	-	NDM-1;OXA-232	CTX-M-15	aadA*;aadA2^	-	-	-	-	-	-	sul1	tet(B).v2*;tetR*	-	dfrA12	OXA-9.v1	-	SHV-1	-	OmpK35-76%	-	GyrA-83F;GyrA-87N;ParC-84K	KL51	K51	-	Typeable	100.00%	-	O3b	O3b	-	Typeable
582285	2017-09-21	Thailand	Stool	ST16	no	no	SAMN54588580	ybt 9; ICEKp3	174	-	0	-	0	-	0	-	0	-	-	NDM-1	CTX-M-15	aadA2^	-	-	-	-	-	-	sul1	tet(B).v2*;tetR*	-	dfrA12	CMY-2.v2	-	SHV-1	-	OmpK35-76%	-	GyrA-83F;GyrA-87N;ParC-84K	KL51	K51	-	Typeable	99.98%	-	O3b	O3b	-	Typeable
582294	2017-09-28	Thailand	Respiratory	ST461	no	no	SAMN54588581	-	0	-	0	-	0	-	0	-	0	-	-	-	CTX-M-15	aac(3)-IIa.v1^;aac(6')-Ib-cr.v2;aadA*;strA.v1^;strB.v1	-	-	qnrB1.v2^	-	catA1*	-	sul2	-	-	dfrA14.v2*	OXA-1;TEM-1D.v1^	-	SHV-1^	-	-	-	-	KL158	unknown (KL158)	!	Typeable	99.28%	-	O1/O2v1	O1ab	-	Typeable
582337	2017-09-29	Thailand	Urine	ST16	no	no	SAMN54588582	ybt 9; ICEKp3	174	-	0	-	0	-	0	-	0	-	-	NDM-1;OXA-232	CTX-M-15	aadA*;aadA2^	-	-	-	-	-	-	sul1	tet(B).v2*;tetR*	-	dfrA12	OXA-9.v1	-	SHV-1	-	OmpK35-76%	-	GyrA-83F;GyrA-87N;ParC-84K	KL51	K51	-	Typeable	99.98%	-	O3b	O3b	-	Typeable
582346	2017-09-29	Thailand	Fluid	ST16	no	no	SAMN54588583	ybt 9; ICEKp3	174	-	0	-	0	-	0	-	0	-	-	NDM-1;OXA-232	CTX-M-15	aadA*;aadA2^	-	-	-	-	-	-	sul1	tet(B).v2*;tetR*	-	dfrA12	OXA-9.v1	-	SHV-1	-	OmpK35-76%	-	GyrA-83F;GyrA-87N;ParC-84K	KL51	K51	-	Typeable	99.98%	-	O3b	O3b	-	Typeable
582443	2017-10-17	Thailand	Urine	ST16	no	no	SAMN54588584	ybt 9; ICEKp3	174	-	0	-	0	-	0	-	0	-	-	NDM-1	CTX-M-15	aac(3)-IId^	-	-	-	Mrx;ermB.v1*;mphA	-	-	sul1	tet(B).v2*;tetR*	-	dfrA12	CMY-2.v2;OXA-9.v1	-	SHV-1	-	OmpK35-76%	-	GyrA-83F;GyrA-87N;ParC-84K	KL51	K51	-	Typeable	99.98%	-	O3b	O3b	-	Typeable
582489	2017-09-29	Thailand	Urine	ST16	no	no	SAMN54588585	ybt 9; ICEKp3	174	-	0	-	0	-	0	-	0	-	-	NDM-1	CTX-M-15	aac(3)-IId^	-	-	-	Mrx;ermB.v1*;mphA	-	-	sul1	tet(B).v2*;tetR*	-	dfrA12	CMY-2.v2;OXA-9.v1	-	SHV-1	-	OmpK35-76%	-	GyrA-83F;GyrA-87N;ParC-84K	KL51	K51	-	Typeable	99.98%	-	O3b	O3b	-	Typeable
582504	2018-07-13	Thailand	Urine	ST15	no	no	SAMN54588586	-	0	-	0	-	0	-	0	-	0	-	-	-	CTX-M-15	aac(3)-IIa.v1^;aac(6')-Ib-cr.v2;strA.v1^;strB.v1	-	-	qnrB1.v2^	-	-	-	sul2	tet(A).v1	-	dfrA14.v2*	OXA-1*;TEM-1D.v1^	-	SHV-28^	-	-	-	GyrA-83F;GyrA-87A;ParC-80I	KL112	unknown (KL112)	-	Typeable	99.53%	-	O1/O2v1	O1ab	-	Typeable
582540	2017-10-22	Thailand	Respiratory	ST15	no	no	SAMN54588587	-	0	-	0	-	0	-	0	-	0	-	-	-	CTX-M-15	aac(3)-IIa.v1^;aac(6')-Ib-cr.v2;strA.v1^;strB.v1	-	-	qnrB1.v2^	-	-	-	sul2	tet(A).v1	-	dfrA14.v2*	OXA-1*;TEM-1D.v1^	-	SHV-28^	-	-	-	GyrA-83F;GyrA-87A;ParC-80I	KL112	unknown (KL112)	-	Typeable	99.53%	-	O1/O2v1	O1ab	-	Typeable
582559	2017-10-17	Thailand	Human	ST11	no	no	SAMN54588588	ybt 9; ICEKp3	183	-	0	-	0	-	0	-	0	-	-	NDM-5;OXA-232	-	-	-	-	-	-	-	-	-	-	-	-	-	-	SHV-11	35Q	-	-	GyrA-83I;ParC-80I	KL15	K15	?2	Typeable	99.92%	-	O4	O4	-	Typeable
582610	2017-10-10	Thailand	Respiratory	ST268	yes	yes	SAMN54588589	ybt 0; ICEKp10	580	clb 3	13	iuc 1	78	iro 1	1	rmp 1; KpVP-1	149	rmpA2_8*	peg-344	-	CTX-M-15	aac(6')-Ib-cr.v2;aadA16*	-	-	-	Mrx;mphA	-	arr-3	sul1	tet(A).v1	-	dfrA27	TEM-1D.v1^	-	SHV-11^	35Q	-	-	-	KL20	K20	-	Typeable	99.94%	-	O1/O2v1	O2a	-	Typeable
582674	2017-09-20	Thailand	Urine	ST15	no	no	SAMN54588590	-	0	-	0	-	0	-	0	-	0	-	-	-	CTX-M-15	aac(3)-IIa.v1^;aac(6')-Ib-cr.v2;strA.v1^;strB.v1	-	-	qnrB1.v2^	-	-	-	sul2	tet(A).v1	-	dfrA14.v2*	OXA-1*;TEM-1D.v1^	-	SHV-28^	-	-	-	GyrA-83F;GyrA-87A;ParC-80I	KL112	unknown (KL112)	-	Typeable	99.53%	-	O1/O2v1	O1ab	-	Typeable
582683	2017-11-21	Thailand	Fluid	ST16	no	no	SAMN54588591	ybt 9; ICEKp3	174	-	0	-	0	-	0	-	0	-	-	NDM-1;OXA-232	CTX-M-15	aadA*;aadA2^	-	-	-	-	-	-	sul1	tet(B).v2*;tetR*	-	dfrA12	OXA-9.v1	-	SHV-1	-	OmpK35-76%	-	GyrA-83F;GyrA-87N;ParC-84K	KL51	K51	-	Typeable	99.98%	-	O3b	O3b	-	Typeable
582692	2017-10-21	Thailand	Respiratory	ST147	no	no	SAMN54588592	ybt 10; ICEKp4	78	-	0	-	0	-	0	-	0	-	-	-	CTX-M-15	aac(3)-IIa.v1^	-	-	-	ereA2*	cmlA5	arr-2	sul1	-	-	-	OXA-1	-	SHV-11^	35Q	-	-	GyrA-83Y;GyrA-87A;ParC-80I	KL10	K10	?3	Typeable	99.00%	-	O3/O3a	O3/O3a	?4	Typeable
582823	2017-10-30	Thailand	Fluid	ST16	no	no	SAMN54588593	ybt 9; ICEKp3	174	-	0	-	0	-	0	-	0	-	-	NDM-1;OXA-232	CTX-M-15	aadA*;aadA2^	-	-	-	-	-	-	sul1	tet(B).v2*;tetR*	-	dfrA12	OXA-9.v1	-	SHV-1	-	OmpK35-76%	-	GyrA-83F;GyrA-87N;ParC-84K	KL51	K51	-	Typeable	99.98%	-	O3b	O3b	-	Typeable
582902	2018-01-01	Thailand	Respiratory	ST16	no	no	SAMN54588594	ybt 9; ICEKp3	174	-	0	-	0	-	0	-	0	-	-	NDM-1	CTX-M-15	aac(3)-IId^;aadA2^	-	-	-	Mrx;ermB.v1*;mphA	-	-	sul1	tet(B).v2*;tetR*	-	dfrA12	CMY-2.v2;OXA-9.v1	-	SHV-1	-	OmpK35-76%	-	GyrA-83F;GyrA-87N;ParC-84K	KL51	K51	-	Typeable	99.98%	-	O3b	O3b	-	Typeable
629482	2011-01-10	Thailand	Human	ST340-1LV	no	no	SAMN54588645	-	0	-	0	-	0	-	0	-	0	-	-	-	CTX-M-15	aac(3)-IId^;aac(6')-Ib-cr.v2;aadA2	-	-	-	-	-	-	sul1	tet(D)	-	dfrA14.v2*	OXA-1;TEM-1D.v1^	-	SHV-11	35Q	-	-	GyrA-83I;ParC-80I	KL15	K15	-	Typeable	99.98%	-	O4	O4	-	Typeable
687268	2018-08-04	Thailand	Respiratory	ST16	no	no	SAMN54588679	ybt 9; ICEKp3	174	-	0	-	0	-	0	-	0	-	-	NDM-1;OXA-232	CTX-M-15	aadA*;aadA2^	-	-	-	-	-	-	sul1	tet(B).v2*;tetR*	-	dfrA12	OXA-9.v1	-	SHV-1	-	OmpK35-76%	-	GyrA-83F;GyrA-87N;ParC-84K	KL51	K51	-	Typeable	100.00%	-	O3b	O3b	-	Typeable
687330	2018-08-19	Thailand	Respiratory	ST294	no	no	SAMN54588680	-	0	-	0	-	0	-	0	-	0	-	-	-	CTX-M-15	strA.v1^;strB.v1	-	-	qnrS1	-	-	-	sul2	-	-	dfrA14.v2*	TEM-1D.v1^	-	SHV-1^	-	-	-	-	KL30	K30	!	Typeable	99.72%	-	O1/O2v1	O1ab	-	Typeable
687356	2018-08-05	Thailand	Urine	ST307	no	no	SAMN54588681	-	0	-	0	-	0	-	0	-	0	-	-	-	CTX-M-15	aac(3)-IIa.v1^;aac(6')-Ib-cr.v2;strA.v1^;strB.v1	-	-	-	-	-	-	sul2	tet(A).v1	-	dfrA14.v2*	OXA-1;TEM-1D.v1^	-	SHV-28^	-	-	-	GyrA-83I;ParC-80I	KL102	unknown (KL102)	-	Typeable	99.66%	-	O1/O2v2	O2afg	-	Typeable
687398	2018-08-02	Thailand	Urine	ST16	no	no	SAMN54588682	ybt 9; ICEKp3	174	-	0	-	0	-	0	-	0	-	-	NDM-1;OXA-232	CTX-M-15	aadA*;aadA2^	-	-	-	-	-	-	sul1	tet(B).v2*;tetR*	-	dfrA12	OXA-9.v1	-	SHV-1	-	OmpK35-76%	-	GyrA-83F;GyrA-87N;ParC-84K	KL51	K51	-	Typeable	100.00%	-	O3b	O3b	-	Typeable
687402	2018-08-01	Thailand	Urine	ST147	no	no	SAMN54588683	ybt 10; ICEKp4	78-1LV	-	0	-	0	-	0	-	0	-	-	-	CTX-M-15;SHV-12^	-	-	-	qnrB6^	Mrx;mphA	-	arr-3	sul1	tet(A).v1	-	dfrA27	TEM-1D.v1^	-	-	238S;240K;35Q	-	-	GyrA-83Y;GyrA-87A;ParC-80I	KL10	K10	?3	Typeable	99.03%	-	O3/O3a	O3/O3a	?4	Typeable
687452	2018-07-28	Thailand	Respiratory	ST20	no	no	SAMN54588684	-	0	-	0	-	0	-	0	-	0	-	-	-	SHV-12	aac(3)-IId^;aadA2^;aadA^;aph(3')-Ia*;strA.v1;strB.v1	-	-	qnrS1	-	cmlA1*;floR.v1*	-	sul3	tet(A).v1*?	-	dfrA12;dfrA14.v2*	TEM-176	-	-	-	-	-	GyrA-87G	KL28	K28	-	Typeable	99.77%	-	O1/O2v2	O1ab	-	Typeable
687478	2018-07-21	Thailand	Urine	ST5994-2LV	no	no	SAMN54588685	-	0	-	0	-	0	-	0	-	0	-	-	-	-	aac(3)-IId^;aph3-Ia.v1^;strA.v1^;strB.v1	-	-	qnrS1	-	-	-	sul1	tet(A).v1	-	dfrA1.v1	TEM-1D.v1^	-	SHV-11^	35Q	-	-	-	KL13	K13	-	Typeable	99.90%	-	O1/O2v1	O1ab	-	Typeable
687494	2018-07-31	Thailand	Urine	ST16	no	no	SAMN54588686	ybt 9; ICEKp3	174	-	0	-	0	-	0	-	0	-	-	NDM-1;OXA-232	CTX-M-15	aadA*;aadA2^	-	-	-	-	-	-	sul1	tet(B).v2*;tetR*	-	dfrA12	OXA-9.v1	-	SHV-1	-	OmpK35-76%	-	GyrA-83F;GyrA-87N;ParC-84K	KL51	K51	-	Typeable	99.98%	-	O3b	O3b	-	Typeable
687662	2018-07-21	Thailand	Urine	ST16	no	no	SAMN54588687	ybt 9; ICEKp3	174	-	0	-	0	-	0	-	0	-	-	NDM-1;OXA-232	CTX-M-15	aadA*;aadA2^	-	-	-	-	-	-	sul1	tet(B).v2*;tetR*	-	dfrA12	OXA-9.v1	-	SHV-1	-	OmpK35-76%	-	GyrA-83F;GyrA-87N;ParC-84K	KL51	K51	-	Typeable	100.00%	-	O3b	O3b	-	Typeable
687696	2018-07-23	Thailand	Urine	ST16	no	no	SAMN54588688	ybt 9; ICEKp3	174	-	0	-	0	-	0	-	0	-	-	NDM-1;OXA-232	CTX-M-15	aadA*;aadA2^	-	-	-	-	-	-	sul1	tet(B).v2*;tetR*	-	dfrA12	OXA-9.v1	-	SHV-1	-	OmpK35-76%	-	GyrA-83F;GyrA-87N;ParC-84K	KL51	K51	-	Typeable	99.98%	-	O3b	O3b	-	Typeable
687928	2018-06-13	Thailand	Urine	ST37	no	no	SAMN54588689	-	0	-	0	-	0	-	0	-	0	-	-	-	CTX-M-3	aadA5	-	-	-	-	catA1*	-	sul1	tet(D)	-	dfrA17	-	-	SHV-11^	35Q	-	-	GyrA-83I;ParC-80I	KL166	unknown (KL166)	-+	Typeable	96.82%	KL166_07;KL166_12_wcmY;KL166_08_wzx;KL166_11_wcuF;KL166_10_wcuP;KL166_13_wcuC;KL166_14_wcaJ;KL166_09_wzy	O5	O5	-	Typeable
687944	2018-07-06	Thailand	Urine	ST307	no	no	SAMN54588690	-	0	-	0	-	0	-	0	-	0	-	-	-	CTX-M-15;CTX-M-63	aac(3)-IIa.v1^;aac(6')-Ib-cr.v2;strA.v1^;strB.v1	-	-	qnrB1.v2^;qnrS1	-	-	-	sul2	tet(A).v1	-	dfrA14.v2*	LAP-2;OXA-1;TEM-1D.v1^	-	SHV-28^	-	-	-	GyrA-83I;ParC-80I	KL102	unknown (KL102)	-	Typeable	99.66%	-	O1/O2v2	O2afg	-	Typeable
687960	2018-07-06	Thailand	Urine	ST340	no	no	SAMN54588691	-	0	-	0	-	0	-	0	-	0	-	-	-	CTX-M-15	aac(3)-IIa.v1^;aac(6')-Ib-cr.v2	-	-	-	-	-	-	-	tet(A).v1^	-	-	OXA-1;TEM-1D.v1^	-	SHV-11	35Q	OmpK35-21%	-	GyrA-83I;ParC-80I	KL55	K55	?2	Typeable	98.81%	-	O3b	O3b	-	Typeable
688060	2018-07-23	Thailand	Blood	ST16	no	no	SAMN54588692	ybt 9; ICEKp3	174	-	0	-	0	-	0	-	0	-	-	NDM-1;OXA-232	CTX-M-15	aadA*;aadA2^	-	-	-	-	-	-	sul1	tet(B).v2*;tetR*	-	dfrA12	OXA-9.v1	-	SHV-1	-	OmpK35-76%	-	GyrA-83F;GyrA-87N;ParC-84K	KL51	K51	-	Typeable	99.98%	-	O3b	O3b	-	Typeable
688078	2018-08-01	Thailand	Urine	ST16	no	no	SAMN54588693	ybt 9; ICEKp3	174	-	0	-	0	-	0	-	0	-	-	NDM-1;OXA-232	CTX-M-15	aac(6')-Ib'.v1;aadA2^	-	-	-	-	-	-	sul1	tet(B).v2*;tetR*	-	dfrA12	-	-	SHV-1	-	OmpK35-76%	-	GyrA-83F;GyrA-87N;ParC-84K	KL51	K51	-	Typeable	99.97%	-	O3b	O3b	-	Typeable
688086	2018-08-12	Thailand	Blood	ST16	no	no	SAMN54588694	ybt 9; ICEKp3	174-1LV	-	0	-	0	-	0	-	0	-	-	NDM-1;OXA-232	CTX-M-15	aadA*;aadA2^	-	-	-	-	-	-	sul1	tet(B).v2*;tetR*	-	dfrA12	OXA-9.v1	-	SHV-1	-	OmpK35-76%	-	GyrA-83F;GyrA-87N;ParC-84K	KL51	K51	-	Typeable	99.98%	-	O3b	O3b	-	Typeable
688094	2018-08-16	Thailand	Respiratory	ST16	no	no	SAMN54588695	ybt 9; ICEKp3	174	-	0	-	0	-	0	-	0	-	-	NDM-1;OXA-232	CTX-M-15	aadA*;aadA2^	-	-	-	-	-	-	sul1	tet(B).v2*;tetR*	-	dfrA12	OXA-9.v1	-	SHV-1	-	OmpK35-76%	-	GyrA-83F;GyrA-87N;ParC-84K	KL51	K51	-	Typeable	99.98%	-	O3b	O3b	-	Typeable
688124	2018-08-27	Thailand	Urine	ST16	no	no	SAMN54588696	ybt 9; ICEKp3 (truncated)	174-1LV	-	0	-	0	-	0	-	0	-	-	NDM-1	CTX-M-15	-	-	-	-	-	-	-	sul1	tet(B).v2*;tetR*	-	dfrA12	CMY-2.v2	-	SHV-1	-	OmpK35-76%	-	GyrA-83F;GyrA-87N;ParC-84K	KL51	K51	?3	Typeable	99.96%	-	O3b	O3b	-	Typeable
688158	2018-08-23	Thailand	Respiratory	ST16	no	no	SAMN54588697	ybt 9; ICEKp3 (truncated)	174-1LV	-	0	-	0	-	0	-	0	-	-	NDM-1;OXA-232	CTX-M-15	aadA*;aadA2^	-	-	-	-	-	-	sul1	tet(B).v2*;tetR*	-	dfrA12	OXA-9.v1	-	SHV-1	-	OmpK35-76%	-	GyrA-83F;GyrA-87N;ParC-84K	KL51	K51	-	Typeable	99.98%	-	O3b	O3b	-	Typeable
688190	2018-08-07	Thailand	Respiratory	ST323	no	no	SAMN54588698	-	0	-	0	-	0	-	0	-	0	-	-	-	CTX-M-63	aac(3)-IId^	-	-	qnrS1	-	-	-	-	-	-	-	TEM-1D.v1^	-	SHV-1^	-	-	-	-	KL21	K21	?3	Typeable	99.99%	-	O3b	O3b	?2	Typeable
688384	2018-09-07	Thailand	Urine	ST16	no	no	SAMN54588699	ybt 9; ICEKp3	174	-	0	-	0	-	0	-	0	-	-	NDM-1;OXA-232	CTX-M-15	aadA*;aadA2^	-	-	-	-	-	-	sul1	tet(B).v2*;tetR*	-	dfrA12	OXA-9.v1	-	SHV-1	-	OmpK35-76%	-	GyrA-83F;GyrA-87N;ParC-84K	KL51	K51	!	Typeable	99.98%	-	O3b	O3b	-	Typeable
688392	2018-08-16	Thailand	Urine	ST15	no	no	SAMN54588700	ybt 10; ICEKp4	381	-	0	-	0	-	0	-	0	-	-	-	CTX-M-15	aac(6')-Ib-cr.v2;aadA16*	-	-	-	Mrx;mphA	-	arr-3	sul1	tet(A).v1	-	dfrA27	TEM-1D.v1^	-	-	-	-	-	GyrA-83I;ParC-80I	KL28	K28	-	Typeable	99.84%	-	O1/O2v1	O1ab	-	Typeable
688480	2018-09-07	Thailand	Urine	ST307	no	no	SAMN54588701	-	0	-	0	-	0	-	0	-	0	-	-	-	CTX-M-15;CTX-M-63	aac(3)-IIa.v1^;aac(6')-Ib-cr.v2;strA.v1^;strB.v1	-	-	qnrB1.v2^;qnrS1	-	-	-	sul2	tet(A).v1	-	dfrA14.v2*	LAP-2;OXA-1;TEM-1D.v1^	-	SHV-28^	-	-	-	GyrA-83I;ParC-80I	KL102	unknown (KL102)	-	Typeable	99.66%	-	O1/O2v2	O2afg	-	Typeable
688498	2018-09-06	Thailand	Unknown	ST16	no	no	SAMN54588702	ybt 9; ICEKp3	174	-	0	-	0	-	0	-	0	-	-	NDM-1;OXA-232	CTX-M-15	aadA*;aadA2^	-	-	-	-	-	-	sul1	tet(B).v2*;tetR*	-	dfrA12	OXA-9.v1	-	SHV-1	-	OmpK35-76%	-	GyrA-83F;GyrA-87N;ParC-84K	KL51	K51	-	Typeable	99.98%	-	O3b	O3b	-	Typeable
688528	2018-09-08	Thailand	Urine	ST307	no	no	SAMN54588703	-	0	-	0	-	0	-	0	-	0	-	-	-	CTX-M-15;CTX-M-63	aac(3)-IIa.v1^;aac(6')-Ib-cr.v2;strA.v1^;strB.v1	-	-	qnrB1.v2^;qnrS1	-	-	-	sul2	tet(A).v1	-	dfrA14.v2*	LAP-2;OXA-1;TEM-1D.v1^	-	SHV-28^	-	-	-	GyrA-83I;ParC-80I	KL102	unknown (KL102)	-	Typeable	99.66%	-	O1/O2v2	O2afg	-	Typeable
688560	2018-09-07	Thailand	Respiratory	ST48	no	no	SAMN54588704	ybt 14; ICEKp5	132-1LV	-	0	-	0	-	0	-	0	-	-	-	CTX-M-15	aac(3)-IIa.v1^;aac(6')-Ib-cr.v2;strA.v1^;strB.v1	-	-	qnrB1.v2^	-	-	-	sul2	tet(A).v1	-	dfrA14.v2*	OXA-1;TEM-1D.v1^	-	SHV-11^	35Q	-	-	-	KL124	unknown (KL124)	!	Typeable	98.28%	-	O1/O2v1	O1ab	-	Typeable
688624	2018-09-12	Thailand	Respiratory	ST294	no	no	SAMN54588705	-	0	-	0	-	0	-	0	-	0	-	-	-	CTX-M-15	strA.v1^;strB.v1	-	-	qnrS1	-	-	-	sul2	-	-	-	TEM-1D.v1^	-	SHV-1^	-	-	-	-	KL30	K30	!	Typeable	99.72%	-	O1/O2v1	O1ab	-	Typeable
688788	2018-09-13	Thailand	Respiratory	ST16	no	no	SAMN54588706	ybt 9; ICEKp3	174	-	0	-	0	-	0	-	0	-	-	NDM-1;OXA-232	CTX-M-15	aadA*;aadA2^	-	-	-	-	-	-	sul1	tet(B).v2*;tetR*	-	dfrA12	OXA-9.v1	-	SHV-1	-	OmpK35-76%	-	GyrA-83F;GyrA-87N;ParC-84K	KL51	K51	-	Typeable	99.98%	-	O3b	O3b	-	Typeable
688834	2018-08-16	Thailand	Urine	ST16	no	no	SAMN54588707	ybt 9; ICEKp3 (truncated)	174-1LV	-	0	-	0	-	0	-	0	-	-	NDM-1	CTX-M-15	-	-	-	-	-	-	-	sul1	tet(B).v2*;tetR*	-	dfrA12	CMY-2.v2	-	SHV-1	-	OmpK35-76%	-	GyrA-83F;GyrA-87N;ParC-84K	KL51	K51	?3	Typeable	99.96%	-	O3b	O3b	-	Typeable
688906	2018-08-20	Thailand	Abscess	ST950	no	no	SAMN54588708	-	0	-	0	-	0	-	0	-	0	-	-	-	CTX-M-15	-	-	-	qnrB6^	Mrx;mphA	-	arr-3	sul1	tet(A).v1	-	dfrA27	TEM-1D.v1^	-	SHV-1	-	-	-	-	KL7	K7	?2	Typeable	99.50%	-	O1/O2v1	O1ab	-	Typeable
689006	2018-10-10	Thailand	Human	ST11	no	no	SAMN54588709	ybt 9; ICEKp3	183-1LV	-	0	-	0	-	0	-	0	-	-	OXA-232	CTX-M-15;SHV-2A^	-	-	-	qnrB6^	Mrx;mphA	-	arr-3	sul1	tet(A).v1	-	dfrA27	TEM-1D.v1^	-	-	238S;35Q	-	-	GyrA-83I;ParC-80I	KL15	K15	?2	Typeable	99.92%	-	O4	O4	-	Typeable
689064	2018-10-09	Thailand	Respiratory	ST485	no	no	SAMN54588710	-	0	-	0	-	0	-	0	-	0	-	-	-	-	aac(6')-Ib-cr.v2^;aph3-Ia.v1^	-	-	qnrB4;qnrS1	Mrx;mphA	catB3.v2	arr-3	sul1	-	-	-	DHA-1;OXA-1	-	SHV-27^	156D	-	-	GyrA-83I;ParC-80R	KL28	K28	-	Typeable	99.84%	-	O1/O2v1	O2a	-	Typeable
689178	2018-10-01	Thailand	Respiratory	ST23-KL1	yes	no	SAMN54588711	ybt 1; ICEKp10	46	clb 2	29	iuc 1	1	iro 1	2	rmp 1; KpVP-1	40	rmpA2_3-47%	peg-344	-	-	-	-	-	-	-	-	-	-	-	-	-	-	-	SHV-11^	35Q	-	-	-	KL1	K1	-	Typeable	99.99%	-	O1/O2v2	O1ab	-	Typeable
689216	2018-09-26	Thailand	Abscess	ST16	no	no	SAMN54588712	ybt 9; ICEKp3	174	-	0	-	0	-	0	-	0	-	-	NDM-1;OXA-232	CTX-M-15	aadA*;aadA2^	-	-	-	-	-	-	-	tet(B).v2*;tetR*	-	dfrA12	OXA-9.v1	-	SHV-1	-	OmpK35-76%	-	GyrA-83F;GyrA-87N;ParC-84K	KL51	K51	-	Typeable	100.00%	-	O3b	O3b	-	Typeable
689258	2018-09-25	Thailand	Respiratory	ST16	no	no	SAMN54588713	ybt 9; ICEKp3 (truncated)	174-1LV	-	0	-	0	-	0	-	0	-	-	NDM-1	CTX-M-15	aadA*;aadA2^	-	-	-	-	-	-	sul1	tet(B).v2*;tetR*	-	dfrA12	OXA-9.v1	-	SHV-1	-	OmpK35-76%	-	GyrA-83F;GyrA-87N;ParC-84K	KL51	K51	-	Typeable	99.88%	-	O3b	O3b	-	Typeable
689266	2018-09-25	Thailand	Urine	ST16	no	no	SAMN54588714	ybt 9; ICEKp3 (truncated)	174-1LV	-	0	-	0	-	0	-	0	-	-	-	CTX-M-15	-	-	-	-	-	-	-	-	-	-	-	-	-	SHV-1	-	OmpK35-76%	-	GyrA-83F;GyrA-87N;ParC-84K	KL51	K51	?3	Typeable	99.98%	-	O3b	O3b	-	Typeable
689312	2018-09-25	Thailand	Blood	ST1746	no	no	SAMN54588715	-	0	-	0	-	0	-	0	-	0	-	-	-	-	-	-	-	-	-	-	-	-	-	-	-	-	-	SHV-28^	-	-	-	-	KL142	unknown (KL142)	?2	Typeable	99.93%	-	O1/O2v1	O1ab	-	Typeable
689354	2018-09-29	Thailand	Human	ST11	no	no	SAMN54588716	ybt 9; ICEKp3	183-1LV	-	0	-	0	-	0	-	0	-	-	OXA-232	CTX-M-15	-	-	-	qnrB6^	Mrx;mphA	-	arr-3	sul1	tet(A).v1	-	dfrA27	TEM-1D.v1^	-	SHV-11^	35Q	-	-	GyrA-83I;ParC-80I	KL15	K15	?2	Typeable	99.92%	-	O4	O4	-	Typeable
689362	2018-09-24	Thailand	Blood	ST294	no	no	SAMN54588717	-	0	-	0	-	0	-	0	-	0	-	-	-	CTX-M-15	strA.v1^;strB.v1	-	-	qnrS1	-	-	-	sul2	tet(A).v1	-	dfrA14.v2*	TEM-1D.v1^	-	SHV-1^	-	-	-	-	KL30	K30	!	Typeable	99.72%	-	O1/O2v1	O1ab	-	Typeable
689442	2018-09-18	Thailand	Urine	ST16	no	no	SAMN54588718	ybt 9; ICEKp3 (truncated)	174-1LV	-	0	-	0	-	0	-	0	-	-	NDM-1	CTX-M-15	-	-	-	-	-	-	-	sul1	tet(B).v2*;tetR*	-	dfrA12	CMY-2.v2	-	SHV-1	-	OmpK35-76%	-	GyrA-83F;GyrA-87N;ParC-84K	KL51	K51	?3	Typeable	99.96%	-	O3b	O3b	-	Typeable
689484	2018-09-18	Thailand	Urine	ST394	no	no	SAMN54588719	-	0	-	0	-	0	-	0	-	0	-	-	-	CTX-M-15	aac(3)-IId^;strA.v1^;strB.v1	-	-	qnrB6^	Mrx;mphA	catII.2*	arr-3	sul1;sul2*	tet(A).v1	-	dfrA14.v2*;dfrA27	-	-	SHV-11^	35Q	-	-	-	KL3	K3	!	Typeable	99.73%	-	O1/O2v2	O2afg	-	Typeable
976583	2021-07-09	Thailand	Unknown	ST65	yes	yes	SAMN54589433	ybt 17; ICEKp10	235	clb 3	13-1LV	iuc 1	1	iro 1	10	rmp 1; KpVP-1 (truncated)	38	rmpA2_8*-60%	peg-344	-	SHV-2A chrm	-	-	-	-	-	-	-	-	-	-	-	-	-	-	238S;35Q	-	-	-	KL2	K2	-	Typeable	99.52%	-	O1/O2v2	O1ab	-	Typeable
817640	2019-09-01	Thailand	Blood	ST420	yes	yes	SAMN54588980	ybt 9; ICEKp3	69-1LV	-	0	iuc 1	5	iro 1	1	rmp 1; KpVP-1	45	rmpA2_6*-55%	peg-344	-	CTX-M-15	aac(3)-IIa.v1^;aac(6')-Ib-cr.v1^;strA.v1^;strB.v1	-	-	qnrB1.v2^	-	-	-	sul2	tet(A).v1	-	dfrA14.v2*	OXA-1;TEM-1D.v1^	-	SHV-75	-	-	-	-	KL20	K20	-	Typeable	99.98%	-	O1/O2v1	O1ab	-	Typeable
974367	2020-12-22	Thailand	Unknown	ST23-KL1	yes	yes	SAMN54589408	ybt 1; ICEKp10	47	clb 2	29	iuc 1	1	iro 1	2	rmp 1; KpVP-1	26	rmpA2_3-47%	peg-344	-	-	-	-	-	-	-	-	-	-	-	-	-	-	-	SHV-11^	35Q	-	-	-	KL1	K1	-	Typeable	99.98%	-	O1/O2v2	O1ab	-	Typeable
817632	2019-09-01	Thailand	Wound	ST420	yes	yes	SAMN54588979	ybt 9; ICEKp3	69	-	0	iuc 1	5	iro 1	1	rmp 1; KpVP-1	45	rmpA2_6-60%	peg-344	-	-	-	-	-	-	-	-	-	-	-	-	-	-	-	SHV-75	-	-	-	GyrA-87N	KL20	K20	-	Typeable	99.99%	-	O1/O2v1	O1ab	-	Typeable
974649	2021-02-12	Thailand	Blood	ST592	yes	yes	SAMN54589410	-	0	-	0	iuc 1	5	iro 1	1-1LV	rmp 1; KpVP-1	26	rmpA2_6*-60%	peg-344	-	-	-	-	-	-	-	-	-	-	-	-	-	-	-	SHV-26	-	-	-	-	KL57	K57	?4	Typeable	99.94%	-	O3b	O3b	?2	Typeable
817762	2020-02-21	Thailand	Wound	ST65	yes	yes	SAMN54588988	ybt 17; ICEKp10	235-1LV	clb 3	13-2LV	iuc 1	1	iro 1	1-1LV	rmp 1; KpVP-1 (truncated)	38	rmpA2_6*-47%	peg-344	-	-	-	-	-	-	-	-	-	-	-	-	-	-	-	SHV-11^	35Q	-	-	-	KL2	K2	-	Typeable	99.52%	-	O1/O2v2	O1ab	-	Typeable
817608	2019-09-01	Thailand	Wound	ST65	yes	yes	SAMN54588976	-	0	-	0	iuc 1	1	iro 1 Chrm	10-1LV	rmp 1; KpVP-1 (truncated) Chrm	38	rmpA2_6-60%	peg-344 Chrm	-	-	-	-	-	-	-	-	-	-	-	-	-	-	-	SHV-11^	35Q	-	-	-	KL2	K2	-	Typeable	99.54%	-	O1/O2v2	O1ab	?2	Typeable
974699	2021-02-13	Thailand	Blood	ST86	yes	yes	SAMN54589411	-	0	-	0	iuc 1	1	iro 1	1	rmp 1; KpVP-1	26	rmpA2_8*	peg-344	-	-	-	-	-	-	-	-	-	-	-	-	-	-	-	SHV-1^	-	-	-	-	KL2	K2	-	Typeable	99.90%	-	O1/O2v1	O1ab	-	Typeable
976365	2021-06-13	Thailand	Blood	ST111	yes	yes	SAMN54589429	ybt 14; ICEKp5	147	-	0	iuc 3	32-1LV	-	0	-	0	-	-	-	CTX-M-55	aac(3)-IId^;aadA2;strA.v1^;strB.v1	-	-	qnrB2.v1^	lnuF.v1	floR.v1	-	sul1;sul2	tet(A).v1?;tet(D)	-	dfrA14.v2*	TEM-1D.v1^	-	SHV-11^	35Q	-	-	-	KL63	K63	-	Typeable	99.80%	-	O1/O2v2	O1ab	-	Typeable
977691	2020-01-09	Thailand	Blood	ST17	yes	yes	SAMN54589450	ybt 15; ICEKp11	231	-	0	iuc 3	25-1LV	-	0	-	0	-	-	-	CTX-M-63	aadA2^;aadA^;aph(3')-IIa;strA.v1;strB.v1	-	-	qnrS1	-	catII.2*;cmlA1*	-	sul2;sul3	tet(A).v1^	-	dfrA12	TEM-1D.v1^	-	SHV-11^	35Q	-	-	-	KL25	K25	!	Typeable	99.65%	-	O5	O5	-	Typeable
976461	2021-06-20	Thailand	Blood	ST37	yes	yes	SAMN54589430	-	0	-	0	iuc 5	59	-	0	-	0	-	-	-	CTX-M-55	aac(3)-IIa.v1^;aadA^;aph3-Ia.v1^	-	-	-	-	catII.2*;floR.v1*	-	sul3^	tet(A).v1*	-	dfrA14.v2*	-	-	SHV-11^	35Q	-	-	-	KL15	K15	-	Typeable	99.83%	-	O4	O4	!	Typeable
817738	2020-01-28	Thailand	Blood	ST420	yes	no	SAMN54588986	ybt 9; ICEKp3	69-1LV	-	0	iuc 1	5	iro 1	1	rmp 1; KpVP-1	45	rmpA2_6-60%	peg-344	-	CTX-M-15	aac(3)-IIa.v1^;aac(6')-Ib-cr.v2;strA.v1^;strB.v1	-	-	qnrB1.v2^	-	-	-	sul2	tet(A).v1	-	dfrA14.v2*	OXA-1;TEM-1D.v1^	-	SHV-75	-	-	-	-	KL20	K20	-	Typeable	99.99%	-	O1/O2v1	O1ab	-	Typeable
817586	2019-09-01	Thailand	Blood	ST420-1LV	yes	no	SAMN54588974	ybt 9; ICEKp3 (truncated)	69-1LV	-	0	iuc 1	5	iro 1	1	rmp 1; KpVP-1	45	-	peg-344	-	CTX-M-15	aac(3)-IIa.v1^;aac(6')-Ib-cr.v2;strA.v1^;strB.v1	-	-	qnrB1.v2^	-	-	-	sul2	-	-	dfrA14.v2*	OXA-1	-	SHV-75	-	-	-	-	KL20	K20	-	Typeable	99.97%	-	O1/O2v1	O1ab	-	Typeable
977705	2020-01-09	Thailand	Urine	ST17	yes	no	SAMN54589451	ybt 15; ICEKp11	231	-	0	iuc 3	25-1LV	-	0	-	0	-	-	-	CTX-M-63	aadA2^;aadA^;aph(3')-IIa;strA.v1;strB.v1	-	-	qnrS1	-	catII.2*;cmlA1*	-	sul2;sul3	tet(A).v1^	-	dfrA12	TEM-1D.v1^	-	SHV-11^	35Q	-	-	-	KL25	K25	!	Typeable	99.65%	-	O5	O5	-	Typeable
817682P	2019-09-01	Thailand	Wound	ST23-KL1	yes	no	PRJNA1354878	ybt 1; ICEKp10	47	clb 2	29	iuc 1	1	iro 1	2	rmp 1; KpVP-1	26	-	peg-344	-	-	-	-	-	-	-	-	-	-	-	-	-	-	-	SHV-11^	35Q	-	-	-	KL1	K1	-	Typeable	99.97%	-	O1/O2v2	O1ab	-	Typeable
974569	2021-01-17	Thailand	Blood	ST23-KL1	yes	no	SAMN54589409	ybt 1; ICEKp10	47	clb 2	29-1LV	iuc 1	1	iro 1	2	rmp 1; KpVP-1	26	rmpA2_6*-60%	peg-344	-	-	-	-	-	-	-	-	-	-	-	-	-	-	-	SHV-11^	35Q	-	-	-	KL1	K1	-	Typeable	99.97%	-	O1/O2v2	O1ab	-	Typeable
817720	2020-01-27	Thailand	Blood	ST23-KL1	yes	no	SAMN54588985	ybt 1; ICEKp10	53	clb 2	29	iuc 1	1	iro 1	2	rmp 1; KpVP-1	26	rmpA2_6-60%	peg-344	-	-	-	-	-	-	-	-	-	-	-	-	-	-	-	SHV-11^	35Q	-	-	-	KL1	K1	-	Typeable	99.99%	-	O1/O2v2	O1ab	!	Typeable
817690	2019-09-01	Thailand	Blood	ST23-KL1	yes	no	SAMN54588983	ybt 1; ICEKp10	47	clb 2	29	iuc 1	1	iro 1	2	rmp 1; KpVP-1	26	rmpA2_6*-55%	peg-344	-	-	-	-	-	-	-	-	-	-	-	-	-	-	-	SHV-11^	35Q	-	-	-	KL1	K1	-	Typeable	99.97%	-	O1/O2v2	O1ab	-	Typeable
975143	2021-04-07	Thailand	Unknown	ST420	yes	no	SAMN54589414	ybt 9; ICEKp3	69	-	0	iuc 1	5	iro 1	1	rmp 1; KpVP-1	45	rmpA2_6-60%	peg-344	-	-	-	-	-	-	-	-	-	-	-	-	-	-	-	SHV-75	-	-	-	-	KL20	K20	-	Typeable	99.96%	-	O1/O2v1	O1ab	-	Typeable
977981	2020-01-16	Thailand	Unknown	ST147	no	no	SAMN54589459	ybt 9; ICEKp3	173-4LV	-	0	-	0	-	0	-	0	-	-	NDM-1	CTX-M-15	aadA*;aph(3')-VI	-	-	qnrS1	-	catB3.v2	arr-3	sul1	-	-	-	OXA-1;OXA-9.v1	-	SHV-11^	35Q	OmpK35-25%	-	GyrA-83I;ParC-80I	KL64	K64	-	Typeable	100.00%	-	O1/O2v1	O2a	-	Typeable
977587	2020-01-13	Thailand	Blood	ST16	no	no	SAMN54589447	ybt 9; ICEKp3	174	-	0	-	0	-	0	-	0	-	-	NDM-1;OXA-232	CTX-M-15	aadA2^	-	-	-	-	-	-	sul1	-	-	dfrA12	OXA-9.v1;TEM-1D.v1^	-	SHV-1	-	OmpK35-76%	-	GyrA-83F;GyrA-87N;ParC-84K	KL51	K51	?2	Typeable	99.98%	-	O3b	O3b	-	Typeable
977595	2020-01-11	Thailand	Blood	ST16	no	no	SAMN54589448	ybt 9; ICEKp3	174	-	0	-	0	-	0	-	0	-	-	NDM-1;OXA-232	CTX-M-15	aadA2^	-	-	-	-	-	-	sul1	-	-	dfrA12	OXA-9.v1;TEM-1D.v1^	-	SHV-1	-	OmpK35-76%	-	GyrA-83F;GyrA-87N;ParC-84K	KL51	K51	-	Typeable	99.98%	-	O3b	O3b	-	Typeable
977609	2020-01-11	Thailand	Blood	ST16	no	no	SAMN54589449	ybt 9; ICEKp3	174	-	0	-	0	-	0	-	0	-	-	NDM-1;OXA-232	CTX-M-15	aadA2^	-	-	-	-	-	-	sul1	-	-	dfrA12	OXA-9.v1;TEM-1D.v1^	-	SHV-1	-	OmpK35-76%	-	GyrA-83F;GyrA-87N;ParC-84K	KL51	K51	?2	Typeable	99.98%	-	O3b	O3b	-	Typeable
976953	2019-04-03	Thailand	Urine	ST105	no	no	SAMN54589437	-	0	-	0	-	0	-	0	-	0	-	-	-	CTX-M-15	aac(3)-IIa.v1*	-	-	-	ermB.v1*	-	-	-	tet(B).v2*;tetR	-	-	-	-	SHV-187*	176E;omega-loop=RWETELNEALPGEARD	-	MgrB-0%	-	KL102	unknown (KL102)	-	Typeable	99.63%	-	O1/O2v2	O2afg	-	Typeable
978065	2020-01-18	Thailand	Unknown	ST147	no	no	SAMN54589460	ybt 9; ICEKp?	584-3LV	-	0	-	0	-	0	-	0	-	-	NDM-1	CTX-M-15	aadA*;aadA2^;aph(3')-VI;aph3-Ia.v1^	-	-	qnrS1	Mrx;mphA	catB3.v2	arr-3	sul1	tet(A).v1	-	dfrA12	OXA-1;OXA-9.v1	-	SHV-11^	35Q	OmpK35-25%	-	GyrA-83I;ParC-80I	KL64	K64	-	Typeable	100.00%	-	O1/O2v1	O2a	-	Typeable
977827	2020-01-15	Thailand	Unknown	ST16	no	no	SAMN54589456	ybt 9; ICEKp3	174	-	0	-	0	-	0	-	0	-	-	NDM-1;OXA-232	CTX-M-15	aadA2^	-	-	-	-	-	-	sul1	tet(B).v2*;tetR*	-	dfrA12	OXA-9.v1;TEM-1D.v1^	-	SHV-1	-	OmpK35-76%	-	GyrA-83F;GyrA-87N;ParC-84K	KL51	K51	-	Typeable	99.98%	-	O3b	O3b	-	Typeable
978241	2020-01-22	Thailand	Urine	ST147	no	no	SAMN54589462	ybt 10; ICEKp4	78	-	0	-	0	-	0	-	0	-	-	-	CTX-M-15	aadA2^;aph3-Ia.v1^	-	-	qnrS1	Mrx;ereA2*;mphA	cmlA5	arr-2	sul1	tet(A).v1*	-	dfrA12	OXA-1	-	SHV-11^	35Q	-	-	GyrA-83Y;GyrA-87A;ParC-80I	KL10	K10	?3	Typeable	99.02%	-	O3/O3a	O3/O3a	?4	Typeable
977499	2020-01-07	Thailand	Unknown	ST16	no	no	SAMN54589444	ybt 9; ICEKp3	174-1LV	-	0	-	0	-	0	-	0	-	-	NDM-1;OXA-232	CTX-M-15	aadA*;aadA2^	-	-	-	-	-	-	sul1	tet(B).v2*;tetR*	-	dfrA12	OXA-9.v1	-	SHV-1	-	OmpK35-76%	-	GyrA-83F;GyrA-87N;ParC-84K	KL51	K51	?2	Typeable	100.00%	-	O3b	O3b	-	Typeable
977771	2020-01-12	Thailand	Unknown	ST16	no	no	SAMN54589454	ybt 9; ICEKp3	174-1LV	-	0	-	0	-	0	-	0	-	-	NDM-1;OXA-232	CTX-M-15	aadA*;aadA2^	-	-	-	-	-	-	sul1	tet(B).v2*;tetR*	-	dfrA12	OXA-9.v1	-	SHV-1	-	OmpK35-76%	-	GyrA-83F;GyrA-87N;ParC-84K	KL51	K51	?2	Typeable	100.00%	-	O3b	O3b	-	Typeable
977965	2020-01-15	Thailand	Blood	ST147	no	no	SAMN54589458	ybt 10; ICEKp4	384-1LV	-	0	-	0	-	0	-	0	-	-	OXA-181	CTX-M-15	aac(6')-Ib*;rmtF	-	-	-	-	-	arr-2	-	-	-	-	-	-	SHV-11^	35Q	OmpK35-76%;OmpK36TD	-	GyrA-83I;ParC-80I	KL64	K64	-	Typeable	100.00%	-	O1/O2v1	O2a	-	Typeable
978187	2020-01-20	Thailand	Unknown	ST147	no	no	SAMN54589461	ybt 10; ICEKp4	384-1LV	-	0	-	0	-	0	-	0	-	-	OXA-181	CTX-M-15	aac(6')-Ib*;rmtF	-	-	-	-	-	arr-2	-	-	-	-	-	-	SHV-11^	35Q	OmpK35-76%;OmpK36TD	-	GyrA-83I;ParC-80I	KL64	K64	-	Typeable	100.00%	-	O1/O2v1	O2a	-	Typeable
976285	2021-06-12	Thailand	Human	ST11	no	no	SAMN54589426	ybt 9; ICEKp3	183-1LV	-	0	-	0	-	0	-	0	-	-	-	CTX-M-15	aac(3)-IIa.v1^;aac(6')-Ib-cr.v2;aadA*;aadA2^	-	-	qnrS1	Mrx;mphA	cmlA5	arr-2	sul1;sul2	tet(A).v1	-	dfrA12;dfrA14.v2*	LAP-2;OXA-1;OXA-10	-	SHV-11	35Q	-	-	GyrA-83I;ParC-80I	KL15	K15	-	Typeable	99.92%	-	O4	O4	-	Typeable
974971	2021-04-03	Thailand	Human	ST11	no	no	SAMN54589412	ybt 9; ICEKp3	183-2LV	-	0	-	0	-	0	-	0	-	-	-	CTX-M-15	aac(3)-IIa.v1^;aac(6')-Ib-cr.v2	-	-	qnrS1	lnuF.v1?	-	-	sul2	tet(A).v1	-	dfrA12	LAP-2;OXA-1	-	SHV-11	35Q	-	-	GyrA-83I;ParC-80I	KL15	K15	-	Typeable	99.90%	-	O4	O4	-	Typeable
975071	2021-04-03	Thailand	Human	ST11	no	no	SAMN54589413	ybt 9; ICEKp3	183-2LV	-	0	-	0	-	0	-	0	-	-	-	CTX-M-15	aac(3)-IIa.v1^;aac(6')-Ib-cr.v2	-	-	qnrS1	lnuF.v1?	-	-	sul2	tet(A).v1	-	dfrA12	LAP-2;OXA-1	-	SHV-11	35Q	-	-	GyrA-83I;ParC-80I	KL15	K15	-	Typeable	99.92%	-	O4	O4	-	Typeable
975151	2021-04-07	Thailand	Urine	ST147	no	no	SAMN54589415	ybt 10; ICEKp4	78	-	0	-	0	-	0	-	0	-	-	-	CTX-M-15	aac(3)-IIa.v1^;aac(6')-Ib-cr.v2;aadA*;aadA2^	-	-	-	Mrx;ereA2*;mphA	cmlA5	arr-2	sul1	tet(A).v1	-	dfrA12	OXA-1;TEM-1D.v1^	-	SHV-11^	35Q	-	-	GyrA-83Y;GyrA-87A;ParC-80I	KL10	K10	?3	Typeable	99.00%	-	O3/O3a	O3/O3a	?4	Typeable
976743	2021-07-11	Thailand	Urine	ST15	no	no	SAMN54589435	-	0	-	0	-	0	-	0	-	0	-	-	-	-	aadA2^;aph3-Ia.v1^;strA.v1^;strB.v1	-	-	qnrB6^	Mrx;mphA	floR.v1*	arr-3	sul2	tet(A).v1?;tet(D)	-	dfrA12;dfrA27	-	-	-	-	OmpK35-0%	-	GyrA-83F;GyrA-87A;ParC-80I	KL110	unknown (KL110)	-	Typeable	99.67%	-	O1/O2v1	O1ab	-	Typeable
728857	2018-04-03	Thailand	Urine	ST101	no	no	SAMN54588766	ybt 16; ICEKp12	466-2LV	-	0	-	0	-	0	-	0	-	-	-	CTX-M-15	strA.v1^;strB.v1	-	-	qnrS1	-	-	-	sul2	tet(A).v1	-	dfrA14.v2*	TEM-1D.v1^	-	SHV-1^	-	-	MgrB-85%	-	KL106	unknown (KL106)	?2+!	Typeable	99.88%	-	O1/O2v2	O1ab	-	Typeable
728865	2018-03-26	Thailand	Urine	ST101	no	no	SAMN54588767	ybt 16; ICEKp12	466-2LV	-	0	-	0	-	0	-	0	-	-	-	CTX-M-15	strA.v1^;strB.v1	-	-	qnrS1	-	-	-	sul2	tet(A).v1	-	dfrA14.v2*	TEM-1D.v1^	-	SHV-1^	-	-	MgrB-85%	-	KL106	unknown (KL106)	?2+!	Typeable	99.88%	-	O1/O2v2	O1ab	-	Typeable
976979	2019-09-06	Thailand	Human	ST11	no	no	SAMN54589438	ybt 9; ICEKp3	183-2LV	-	0	-	0	-	0	-	0	-	-	-	CTX-M-15	-	-	-	qnrB6^	Mrx;mphA	-	arr-3	sul1	tet(A).v1	-	dfrA27	TEM-1D.v1^	-	SHV-11^	35Q	-	-	GyrA-83I;ParC-80I	KL15	K15	-	Typeable	99.91%	-	O4	O4	?2!	Typeable
791887	2019-09-08	Thailand	Human	ST11	no	no	SAMN54588845	ybt 9; ICEKp3	183	-	0	-	0	-	0	-	0	-	-	NDM-5	CTX-M-15	aac(6')-Ib-cr.v2;aadA2^;aph3-Ia.v1^	-	-	qnrS1	Mrx;mphA	-	-	sul1	tet(A).v1;tet(D)	-	dfrA12	LAP-2;OXA-1;TEM-1D.v1^	-	SHV-11	35Q	-	-	GyrA-83I;ParC-80I	KL15	K15	-	Typeable	99.92%	-	O4	O4	-	Typeable
977045	2019-12-23	Thailand	Urine	ST13	no	no	SAMN54589439	-	0	-	0	-	0	-	0	-	0	-	-	-	CTX-M-40	aac(3)-IId^;strA.v1;strB.v1	-	-	qnrS1	-	-	-	-	tet(C)*	-	-	TEM-1D.v1^	-	SHV-1^	-	-	-	-	KL3	K3	?2!	Typeable	99.96%	-	O1/O2v2	O1ab	-	Typeable
791619	2019-03-13	Thailand	Surveillance	ST14	no	no	SAMN54588818	ybt 14; ICEKp5	140	-	0	-	0	-	0	-	0	-	-	OXA-232	CTX-M-15	aac(6')-Ib-cr.v2;sat-2	-	-	-	-	-	-	-	-	-	dfrA1.v1	OXA-1	-	SHV-28^	-	OmpK35-69%;OmpK36GD	-	GyrA-83Y;GyrA-87G;ParC-80I	KL2	K2	-	Typeable	99.81%	-	O1/O2v1	O1ab	?2!	Typeable
791643	2019-03-06	Thailand	Surveillance	ST14	no	no	SAMN54588821	ybt 14; ICEKp5	140	-	0	-	0	-	0	-	0	-	-	OXA-232	CTX-M-15	aac(6')-Ib-cr.v2;sat-2	-	-	-	-	-	-	-	-	-	dfrA1.v1	OXA-1	-	SHV-28^	-	OmpK35-69%;OmpK36GD	-	GyrA-83Y;GyrA-87G;ParC-80I	KL2	K2	-	Typeable	99.81%	-	O1/O2v1	O1ab	?2!	Typeable
791589	2019-05-08	Thailand	Surveillance	ST147	no	no	SAMN54588815	ybt 10; ICEKp4	384-1LV	-	0	-	0	-	0	-	0	-	-	OXA-181?	CTX-M-15	aac(6')-Ib?;rmtF	-	-	qnrB1.v2^	-	-	arr-2	-	-	-	-	-	-	SHV-11^	35Q	OmpK35-76%;OmpK36TD	-	GyrA-83I;ParC-80I	KL64	K64	-	Typeable	99.99%	-	O1/O2v1	O2a	-	Typeable
976009	2021-05-27	Thailand	Urine	ST16	no	no	SAMN54589422	ybt 9; ICEKp3 (truncated)	174-1LV	-	0	-	0	-	0	-	0	-	-	-	CTX-M-15	aac(3)-IId^;aph3-Ia.v1;strA.v1^;strB.v1	-	-	qnrB6^	Mrx;mphA	catII.2*	arr-3	sul1;sul2*	tet(A).v1	-	dfrA27	TEM-1D.v1^	-	SHV-1	-	-	-	GyrA-83F;GyrA-87N;ParC-84K	KL51	K51	-	Typeable	100.00%	-	O3b	O3b	-	Typeable
976307	2021-06-12	Thailand	Unknown	ST16	no	no	SAMN54589427	ybt 9; ICEKp3	174-1LV	-	0	-	0	-	0	-	0	-	-	-	CTX-M-15	aac(3)-IId^;aph3-Ia.v1;strA.v1^;strB.v1	-	-	qnrB6^	Mrx;mphA	-	arr-3	sul1;sul2*	tet(A).v1	-	dfrA27	-	-	SHV-1	-	-	-	GyrA-83F;GyrA-87N;ParC-84K	KL51	K51	-	Typeable	99.98%	-	O3b	O3b	-	Typeable
976025	2021-05-27	Thailand	Unknown	ST17-2LV	no	no	SAMN54589423	-	0	-	0	-	0	-	0	-	0	-	-	-	CTX-M-3	aac(3)-IId^;aac(6')-Ib-cr.v2;aadA16*;aph3-Ia.v1;strA.v1^;strB.v1	-	-	qnrS1	Mrx;mphA	floR.v1	arr-3	sul1;sul2*	tet(A).v2	-	dfrA27	TEM-1D.v1^	-	SHV-212*	-	-	-	-	KL63	K63	-	Typeable	99.63%	-	O1/O2v2	O1ab	-	Typeable
975749	2021-05-10	Thailand	Blood	ST2004	no	no	SAMN54589419	-	0	-	0	-	0	-	0	-	0	-	-	-	CTX-M-15	aac(3)-IIa.v1^;strA.v1^;strB.v1	-	-	qnrB1.v2^	-	-	-	sul2	tet(A).v1	-	dfrA14.v2*	TEM-1D.v1^	-	SHV-168^	146V	-	-	-	KL23	K23	-	Typeable	99.76%	-	O1/O2v2	O2afg	-	Typeable
977579	2020-01-13	Thailand	Blood	ST20	no	no	SAMN54589446	-	0	-	0	-	0	-	0	-	0	-	-	-	SHV-12	aac(3)-IId^;aadA2^;aadA^;aph(3')-Ia*;strA.v1;strB.v1	-	-	qnrS1	-	cmlA1*;floR.v1*	-	sul3	tet(A).v1*?	-	dfrA12;dfrA14.v2*	TEM-176	-	-	-	-	-	-	KL28	K28	-	Typeable	99.77%	-	O1/O2v2	O1ab	-	Typeable
976613	2021-07-11	Thailand	Unknown	ST2411	no	no	SAMN54589434	-	0	-	0	-	0	-	0	-	0	-	-	-	-	-	-	-	-	-	-	-	-	-	-	-	-	-	SHV-168*	-	-	-	-	KL20	K20	?6	Typeable	99.33%	-	O3b	O3b	?7	Typeable
975539	2021-04-30	Thailand	Unknown	ST2457	no	no	SAMN54589418	-	0	-	0	-	0	-	0	-	0	-	-	-	-	-	-	-	-	-	-	-	-	-	-	-	-	-	SHV-1^	-	-	-	-	KL21	K21	?3	Typeable	99.67%	-	O3b	O3b	?2	Typeable
976243	2021-06-12	Thailand	Unknown	ST307	no	no	SAMN54589425	-	0	-	0	-	0	-	0	-	0	-	-	-	CTX-M-15	aac(3)-IIa.v1^;aac(6')-Ib-cr.v2;strA.v1^;strB.v1	-	-	-	-	-	-	sul2	-	-	dfrA14.v2*	OXA-1;TEM-1D.v1^	-	SHV-28^	-	-	-	GyrA-83I;ParC-80I	KL102	unknown (KL102)	-	Typeable	99.66%	-	O1/O2v2	O2afg	-	Typeable
976495	2021-06-20	Thailand	Unknown	ST307	no	no	SAMN54589431	-	0	-	0	-	0	-	0	-	0	-	-	-	CTX-M-15	aac(3)-IIa.v1^;aac(6')-Ib-cr.v2;strA.v1^;strB.v1	-	-	qnrB1.v2^	-	-	-	sul2	tet(A).v1	-	dfrA14.v2*	OXA-1;TEM-1D.v1^	-	SHV-28^	-	-	-	GyrA-83I;ParC-80I	KL102	unknown (KL102)	-	Typeable	99.65%	-	O1/O2v2	O2afg	-	Typeable
977561	2020-01-13	Thailand	Urine	ST20	no	no	SAMN54589445	-	0	-	0	-	0	-	0	-	0	-	-	-	-	aac(3)-IId^;aadA2^;aadA^;aph(3')-Ia*;strA.v1;strB.v1	-	-	qnrS1	-	cmlA1*;floR.v1*	-	sul3	tet(A).v1?	-	dfrA12;dfrA14.v2*	TEM-176	-	-	-	-	-	-	KL28	K28	-	Typeable	99.77%	-	O1/O2v2	O1ab	-	Typeable
791799	2019-09-14	Thailand	Urine	ST147	no	no	SAMN54588836	ybt 9; ICEKp3	173-4LV	-	0	-	0	-	0	-	0	-	-	NDM-1	CTX-M-15	aadA*;aph(3')-VI	-	-	qnrS1	-	-	-	sul1	-	-	-	OXA-9.v1	-	SHV-11^	35Q	OmpK35-25%	-	GyrA-83I;ParC-80I	KL64	K64	-	Typeable	100.00%	-	O1/O2v1	O2a	-	Typeable
792163	2019-02-10	Thailand	Urine	ST147	no	no	SAMN54588873	ybt 9; ICEKp3	173-4LV	-	0	-	0	-	0	-	0	-	-	NDM-1	CTX-M-15	aadA*;aph(3')-VI	-	-	qnrS1	-	-	-	sul1	-	-	-	OXA-9.v1	-	SHV-11^	35Q	OmpK35-25%	-	GyrA-83I;ParC-80I	KL64	K64	-	Typeable	100.00%	-	O1/O2v1	O2a	!	Typeable
792201	2019-10-07	Thailand	Urine	ST147	no	no	SAMN54588877	ybt 9; ICEKp3	173-4LV	-	0	-	0	-	0	-	0	-	-	NDM-1	CTX-M-15	aadA*;aph(3')-VI	-	-	qnrS1	-	-	-	sul1	-	-	-	OXA-9.v1	-	SHV-11^	35Q	OmpK35-25%	-	GyrA-83I;ParC-80I	KL64	K64	-	Typeable	99.98%	-	O1/O2v1	O2a	-	Typeable
791467	2019-06-17	Thailand	Urine	ST147	no	no	SAMN54588803	ybt 9; ICEKp3	173-4LV	-	0	-	0	-	0	-	0	-	-	NDM-1	CTX-M-15	aadA*;aph(3')-VI	-	-	qnrS1	-	catB3.v2	arr-3	sul1	-	-	-	OXA-1;OXA-9.v1	-	SHV-11^	35Q	OmpK35-25%	-	GyrA-83I;ParC-80I	KL64	K64	?2	Typeable	100.00%	-	O1/O2v1	O2a	-	Typeable
977819	2020-01-14	Thailand	Unknown	ST2123	no	no	SAMN54589455	-	0	-	0	-	0	-	0	-	0	-	-	-	CTX-M-15	strA.v1^;strB.v1	-	-	qnrS1	-	-	-	sul2	tet(A).v1	-	dfrA14.v2*	TEM-1D.v1^	-	SHV-32	156D	-	-	-	KL141	unknown (KL141)	-	Typeable	99.70%	-	O4	O4	-	Typeable
791475	2019-07-07	Thailand	Urine	ST147	no	no	SAMN54588804	ybt 9; ICEKp3 (truncated)	173-4LV	-	0	-	0	-	0	-	0	-	-	NDM-1	CTX-M-15	aadA*;aph(3')-VI	-	-	qnrS1	-	catB3.v2	arr-3	sul1	-	-	-	OXA-1;OXA-9.v1	-	SHV-11^	35Q	OmpK35-25%	-	GyrA-83I;ParC-80I	KL64	K64	-	Typeable	100.00%	-	O1/O2v1	O2a	-	Typeable
791505	2019-07-09	Thailand	Surveillance	ST147	no	no	SAMN54588807	ybt 9; ICEKp3	173-4LV	-	0	-	0	-	0	-	0	-	-	NDM-1	CTX-M-15	aadA*;aph(3')-VI	-	-	qnrS1	-	catB3.v2	arr-3	sul1	-	-	-	OXA-1;OXA-9.v1	-	SHV-11^	35Q	OmpK35-25%	-	GyrA-83I;ParC-80I	KL64	K64	-	Typeable	100.00%	-	O1/O2v1	O2a	-	Typeable
791513	2019-07-09	Thailand	Respiratory	ST147	no	no	SAMN54588808	ybt 9; ICEKp3	173-4LV	-	0	-	0	-	0	-	0	-	-	NDM-1	CTX-M-15	aadA*;aph(3')-VI	-	-	qnrS1	-	catB3.v2	arr-3	sul1	-	-	-	OXA-1;OXA-9.v1	-	SHV-11^	35Q	OmpK35-25%	-	GyrA-83I;ParC-80I	KL64	K64	-	Typeable	100.00%	-	O1/O2v1	O2a	-	Typeable
791521	2019-07-05	Thailand	Urine	ST147	no	no	SAMN54588809	ybt 9; ICEKp3	173-4LV	-	0	-	0	-	0	-	0	-	-	NDM-1	CTX-M-15	aadA*;aph(3')-VI	-	-	qnrS1	-	catB3.v2	arr-3	sul1	-	-	-	OXA-1;OXA-9.v1	-	SHV-11^	35Q	OmpK35-25%	-	GyrA-83I;ParC-80I	KL64	K64	-	Typeable	100.00%	-	O1/O2v1	O2a	-	Typeable
978291	2020-01-22	Thailand	Unknown	ST147	no	no	SAMN54589463	ybt 10; ICEKp4	384-1LV	-	0	-	0	-	0	-	0	-	-	OXA-181	CTX-M-15	aac(6')-Ib?;rmtF	-	-	-	-	-	arr-2	-	-	-	-	-	-	SHV-11^	35Q	OmpK35-76%;OmpK36TD	-	GyrA-83I;ParC-80I	KL64	K64	-	Typeable	100.00%	-	O1/O2v1	O2a	-	Typeable
791571	2019-03-13	Thailand	Respiratory	ST147	no	no	SAMN54588814	ybt 9; ICEKp3	173-4LV	-	0	-	0	-	0	-	0	-	-	NDM-1	CTX-M-15	aadA*;aph(3')-VI	-	-	qnrS1	-	catB3.v2	arr-3	sul1	-	-	-	OXA-1;OXA-9.v1	-	SHV-11^	35Q	OmpK35-25%	-	GyrA-83I;ParC-80I	KL64	K64	-	Typeable	100.00%	-	O1/O2v1	O2a	-	Typeable
791601	2019-03-13	Thailand	Respiratory	ST147	no	no	SAMN54588817	ybt 9; ICEKp3	173-4LV	-	0	-	0	-	0	-	0	-	-	NDM-1	CTX-M-15	aadA*;aph(3')-VI	-	-	qnrS1	-	catB3.v2	arr-3	sul1	-	-	-	OXA-1;OXA-9.v1	-	SHV-11^	35Q	OmpK35-25%	-	GyrA-83I;ParC-80I	KL64	K64	-	Typeable	100.00%	-	O1/O2v1	O2a	-	Typeable
728751	2018-04-17	Thailand	Urine	ST16	no	no	SAMN54588756	ybt 9; ICEKp3	174	-	0	-	0	-	0	-	0	-	-	NDM-1; OXA-232	CTX-M-15	aac(6')-Ib'.v1;aadA2^	-	-	-	-	-	-	sul1	tet(B).v2*;tetR*	-	dfrA12	-	-	SHV-1	-	OmpK35-76%	-	GyrA-83F;GyrA-87N;ParC-84K	KL51	K51	-	Typeable	99.97%	-	O3b	O3b	-	Typeable
975475	2021-04-30	Thailand	Urine	ST401	no	no	SAMN54589416	ybt 9; ICEKp3 (truncated)	183-2LV	-	0	-	0	-	0	-	0	-	-	NDM-4	CTX-M-14;CTX-M-15	aadA*	-	-	qnrS1	-	-	-	sul1	tet(A).v1	-	dfrA1.v1	LAP-2	-	SHV-1^	-	OmpK35-30%	-	-	KL17	K17	-	Typeable	99.99%	-	O1/O2v1	O1ab	-	Typeable
791627	2019-03-07	Thailand	Urine	ST147	no	no	SAMN54588819	ybt 9; ICEKp3	173-4LV	-	0	-	0	-	0	-	0	-	-	NDM-1	CTX-M-15	aadA*;aph(3')-VI	-	-	qnrS1	-	catB3.v2	arr-3	sul1	-	-	-	OXA-1;OXA-9.v1	-	SHV-11^	35Q	OmpK35-25%	-	GyrA-83I;ParC-80I	KL64	K64	-	Typeable	100.00%	-	O1/O2v1	O2a	-	Typeable
791635	2019-03-07	Thailand	Surveillance	ST147	no	no	SAMN54588820	ybt 9; ICEKp3	173-4LV	-	0	-	0	-	0	-	0	-	-	NDM-1	CTX-M-15	aadA*;aph(3')-VI	-	-	qnrS1	-	catB3.v2	arr-3	sul1	-	-	-	OXA-1;OXA-9.v1	-	SHV-11^	35Q	OmpK35-25%	-	GyrA-83I;ParC-80I	KL64	K64	-	Typeable	100.00%	-	O1/O2v1	O2a	-	Typeable
791651	2019-03-06	Thailand	Respiratory	ST147	no	no	SAMN54588822	ybt 9; ICEKp3	173-4LV	-	0	-	0	-	0	-	0	-	-	NDM-1	CTX-M-15	aadA*;aph(3')-VI	-	-	qnrS1	-	catB3.v2	arr-3	sul1	-	-	-	OXA-1;OXA-9.v1	-	SHV-11^	35Q	OmpK35-25%	-	GyrA-83I;ParC-80I	KL64	K64	-	Typeable	100.00%	-	O1/O2v1	O2a	-	Typeable
975491	2021-04-30	Thailand	Blood	ST147	no	no	SAMN54589417	ybt 9; ICEKp3	173-2LV	-	0	-	0	-	0	-	0	-	-	NDM-5	CTX-M-15	aac(6')-Ib-cr.v2;aadA2^;aph(3')-VI;rmtB	-	-	qnrS1	-	catB3.v2	arr-3	sul1	-	-	dfrA12	OXA-1;TEM-1D.v1^	-	SHV-11^	35Q	OmpK35-25%	-	GyrA-83I;ParC-80I	KL64	K64	-	Typeable	100.00%	-	O1/O2v1	O2a	-	Typeable
791669	2019-05-01	Thailand	Surveillance	ST147	no	no	SAMN54588823	ybt 9; ICEKp3	173-4LV	-	0	-	0	-	0	-	0	-	-	NDM-1	CTX-M-15	aadA*;aph(3')-VI	-	-	qnrS1	-	catB3.v2	arr-3	sul1	-	-	-	OXA-1;OXA-9.v1	-	SHV-11^	35Q	OmpK35-25%	-	GyrA-83I;ParC-80I	KL64	K64	-	Typeable	100.00%	-	O1/O2v1	O2a	-	Typeable
791677	2019-05-06	Thailand	Urine	ST147	no	no	SAMN54588824	ybt 9; ICEKp3	173-4LV	-	0	-	0	-	0	-	0	-	-	NDM-1	CTX-M-15	aadA*;aph(3')-VI	-	-	qnrS1	-	catB3.v2	arr-3	sul1	-	-	-	OXA-1;OXA-9.v1	-	SHV-11^	35Q	OmpK35-25%	-	GyrA-83I;ParC-80I	KL64	K64	-	Typeable	100.00%	-	O1/O2v1	O2a	-	Typeable
977713	2020-01-09	Thailand	Urine	ST307	no	no	SAMN54589452	-	0	-	0	-	0	-	0	-	0	-	-	-	CTX-M-15	aac(3)-IIa.v1^;aac(6')-Ib-cr.v2;strA.v1^;strB.v1	-	-	qnrB1.v2^;qnrS1	-	-	-	sul2	tet(A).v1	-	dfrA14.v2*	OXA-1;TEM-1D.v1^	-	SHV-28^	-	-	-	GyrA-83I;ParC-80I	KL102	unknown (KL102)	-	Typeable	99.66%	-	O1/O2v2	O2afg	-	Typeable
977869	2020-01-14	Thailand	Urine	ST323	no	no	SAMN54589457	-	0	-	0	-	0	-	0	-	0	-	-	-	CTX-M-15	aac(6')-Ib-cr.v2;strA.v1^;strB.v1	-	-	qnrB1.v2^	-	-	-	sul2	tet(A).v1	-	dfrA14.v2*	OXA-1;TEM-1D.v1^	-	SHV-1^	-	OmpK35-70%	-	-	KL21	K21	?3	Typeable	99.99%	-	O3b	O3b	?2	Typeable
791693	2019-04-17	Thailand	Surveillance	ST147	no	no	SAMN54588826	ybt 9; ICEKp3	173-4LV	-	0	-	0	-	0	-	0	-	-	NDM-1	CTX-M-15	aadA*;aph(3')-VI	-	-	qnrS1	-	catB3.v2	arr-3	sul1	-	-	-	OXA-1;OXA-9.v1	-	SHV-11^	35Q	OmpK35-25%	-	GyrA-83I;ParC-80I	KL64	K64	-	Typeable	100.00%	-	O1/O2v1	O2a	-	Typeable
791715	2019-05-03	Thailand	Urine	ST147	no	no	SAMN54588828	ybt 9; ICEKp3	173-4LV	-	0	-	0	-	0	-	0	-	-	NDM-1	CTX-M-15	aadA*;aph(3')-VI	-	-	qnrS1	-	catB3.v2	arr-3	sul1	-	-	-	OXA-1;OXA-9.v1	-	SHV-11^	35Q	OmpK35-25%	-	GyrA-83I;ParC-80I	KL64	K64	-	Typeable	100.00%	-	O1/O2v1	O2a	-	Typeable
791723	2019-03-27	Thailand	Surveillance	ST147	no	no	SAMN54588829	ybt 9; ICEKp3	173-4LV	-	0	-	0	-	0	-	0	-	-	NDM-1	CTX-M-15	aadA*;aph(3')-VI	-	-	qnrS1	-	catB3.v2	arr-3	sul1	-	-	-	OXA-1;OXA-9.v1	-	SHV-11^	35Q	OmpK35-25%	-	GyrA-83I;ParC-80I	KL64	K64	-	Typeable	100.00%	-	O1/O2v1	O2a	-	Typeable
791749	2019-05-22	Thailand	Urine	ST147	no	no	SAMN54588831	ybt 9; ICEKp3	173-4LV	-	0	-	0	-	0	-	0	-	-	NDM-1	CTX-M-15	aadA*;aph(3')-VI	-	-	qnrS1	-	catB3.v2	arr-3	sul1	-	-	-	OXA-1;OXA-9.v1	-	SHV-11^	35Q	OmpK35-25%	-	GyrA-83I;ParC-80I	KL64	K64	-	Typeable	100.00%	-	O1/O2v1	O2a	-	Typeable
791757	2019-07-25	Thailand	Urine	ST147	no	no	SAMN54588832	ybt 9; ICEKp3 (truncated)	173-4LV	-	0	-	0	-	0	-	0	-	-	NDM-1	CTX-M-15	aadA*;aph(3')-VI	-	-	qnrS1	-	catB3.v2	arr-3	sul1	-	-	-	OXA-1;OXA-9.v1	-	SHV-11^	35Q	OmpK35-25%	-	GyrA-83I;ParC-80I	KL64	K64	-	Typeable	100.00%	-	O1/O2v1	O2a	-	Typeable
791781	2019-09-04	Thailand	Surveillance	ST147	no	no	SAMN54588835	ybt 9; ICEKp3	173-4LV	-	0	-	0	-	0	-	0	-	-	NDM-1	CTX-M-15	aadA*;aph(3')-VI	-	-	qnrS1	-	catB3.v2	arr-3	sul1	-	-	-	OXA-1;OXA-9.v1	-	SHV-11^	35Q	OmpK35-25%	-	GyrA-83I;ParC-80I	KL64	K64	-	Typeable	100.00%	-	O1/O2v1	O2a	-	Typeable
791803	2019-08-31	Thailand	Respiratory	ST147	no	no	SAMN54588837	ybt 9; ICEKp3	173-4LV	-	0	-	0	-	0	-	0	-	-	NDM-1	CTX-M-15	aadA*;aph(3')-VI	-	-	qnrS1	-	catB3.v2	arr-3	sul1	-	-	-	OXA-1;OXA-9.v1	-	SHV-11^	35Q	OmpK35-25%	-	GyrA-83I;ParC-80I	KL64	K64	?2	Typeable	100.00%	-	O1/O2v1	O2a	-	Typeable
791811	2019-08-31	Thailand	Surveillance	ST147	no	no	SAMN54588838	ybt 9; ICEKp3	173-4LV	-	0	-	0	-	0	-	0	-	-	NDM-1	CTX-M-15	aadA*;aph(3')-VI	-	-	qnrS1	-	catB3.v2	arr-3	sul1	-	-	-	OXA-1;OXA-9.v1	-	SHV-11^	35Q	OmpK35-25%	-	GyrA-83I;ParC-80I	KL64	K64	-	Typeable	99.99%	-	O1/O2v1	O2a	-	Typeable
791837	2019-08-09	Thailand	Urine	ST147	no	no	SAMN54588840	ybt 9; ICEKp3	173-4LV	-	0	-	0	-	0	-	0	-	-	NDM-1	CTX-M-15	aadA*;aph(3')-VI	-	-	qnrS1	-	catB3.v2	arr-3	sul1	-	-	-	OXA-1;OXA-9.v1	-	SHV-11^	35Q	OmpK35-25%	-	GyrA-83I;ParC-80I	KL64	K64	-	Typeable	100.00%	-	O1/O2v1	O2a	-	Typeable
791845	2019-09-07	Thailand	Urine	ST147	no	no	SAMN54588841	ybt 9; ICEKp3	173-4LV	-	0	-	0	-	0	-	0	-	-	NDM-1	CTX-M-15	aadA*;aph(3')-VI	-	-	qnrS1	-	catB3.v2	arr-3	sul1	-	-	-	OXA-1;OXA-9.v1	-	SHV-11^	35Q	OmpK35-25%	-	GyrA-83I;ParC-80I	KL64	K64	-	Typeable	100.00%	-	O1/O2v1	O2a	-	Typeable
791853	2019-08-10	Thailand	Surveillance	ST147	no	no	SAMN54588842	ybt 9; ICEKp3 (truncated)	173-4LV	-	0	-	0	-	0	-	0	-	-	NDM-1	CTX-M-15	aadA*;aph(3')-VI	-	-	qnrS1	-	catB3.v2	arr-3	sul1	-	-	-	OXA-1;OXA-9.v1	-	SHV-11^	35Q	OmpK35-25%	-	GyrA-83I;ParC-80I	KL64	K64	-	Typeable	100.00%	-	O1/O2v1	O2a	-	Typeable
791879	2019-08-12	Thailand	Surveillance	ST147	no	no	SAMN54588844	ybt 9; ICEKp3	173-4LV	-	0	-	0	-	0	-	0	-	-	NDM-1	CTX-M-15	aadA*;aph(3')-VI	-	-	qnrS1	-	catB3.v2	arr-3	sul1	-	-	-	OXA-1;OXA-9.v1	-	SHV-11^	35Q	OmpK35-25%	-	GyrA-83I;ParC-80I	KL64	K64	-	Typeable	99.99%	-	O1/O2v1	O2a	-	Typeable
791895	2019-08-10	Thailand	Surveillance	ST147	no	no	SAMN54588846	ybt 9; ICEKp3	173-4LV	-	0	-	0	-	0	-	0	-	-	NDM-1	CTX-M-15	aadA*;aph(3')-VI	-	-	qnrS1	-	catB3.v2	arr-3	sul1	-	-	-	OXA-1;OXA-9.v1	-	SHV-11^	35Q	OmpK35-25%	-	GyrA-83I;ParC-80I	KL64	K64	-	Typeable	100.00%	-	O1/O2v1	O2a	-	Typeable
791909	2019-08-12	Thailand	Surveillance	ST147	no	no	SAMN54588847	ybt 9; ICEKp3	173-4LV	-	0	-	0	-	0	-	0	-	-	NDM-1	CTX-M-15	aadA*;aph(3')-VI	-	-	qnrS1	-	catB3.v2	arr-3	sul1	-	-	-	OXA-1;OXA-9.v1	-	SHV-11^	35Q	OmpK35-25%	-	GyrA-83I;ParC-80I	KL64	K64	-	Typeable	100.00%	-	O1/O2v1	O2a	-	Typeable
791941	2019-08-10	Thailand	Urine	ST147	no	no	SAMN54588851	ybt 9; ICEKp3	173-4LV	-	0	-	0	-	0	-	0	-	-	NDM-1	CTX-M-15	aadA*;aph(3')-VI	-	-	qnrS1	-	catB3.v2	arr-3	sul1	-	-	-	OXA-1;OXA-9.v1	-	SHV-11^	35Q	OmpK35-25%	-	GyrA-83I;ParC-80I	KL64	K64	-	Typeable	100.00%	-	O1/O2v1	O2a	-	Typeable
791991	2019-07-25	Thailand	Urine	ST147	no	no	SAMN54588856	ybt 9; ICEKp3 (truncated)	173-4LV	-	0	-	0	-	0	-	0	-	-	NDM-1	CTX-M-15	aadA*;aph(3')-VI	-	-	qnrS1	-	catB3.v2	arr-3	sul1	-	-	-	OXA-1;OXA-9.v1	-	SHV-11^	35Q	OmpK35-25%	-	GyrA-83I;ParC-80I	KL64	K64	-	Typeable	100.00%	-	O1/O2v1	O2a	-	Typeable
792017	2019-08-22	Thailand	Surveillance	ST147	no	no	SAMN54588858	ybt 9; ICEKp?	584-3LV	-	0	-	0	-	0	-	0	-	-	NDM-1	CTX-M-15	aadA*;aadA2^;aph(3')-VI;aph3-Ia.v1^	-	-	qnrS1	Mrx;mphA	catB3.v2	arr-3	sul1	tet(A).v1	-	dfrA12	OXA-1;OXA-9.v1	-	SHV-11^	35Q	OmpK35-25%	-	GyrA-83I;ParC-80I	KL64	K64	-	Typeable	100.00%	-	O1/O2v1	O2a	-	Typeable
728881	2018-04-17	Thailand	Urine	ST15	no	no	SAMN54588769	-	0	-	0	-	0	-	0	-	0	-	-	-	CTX-M-15	aac(6')-Ib-cr.v2;aadA2^;aph3-Ia.v1^	-	-	-	Mrx;mphA	-	-	sul1	tet(A).v1	-	dfrA12	OXA-1;TEM-1D.v1^	-	SHV-28^	-	-	-	GyrA-83F;GyrA-87A;ParC-80I	KL112	unknown (KL112)	-	Typeable	99.53%	-	O1/O2v1	O1ab	-	Typeable
792041	2019-08-17	Thailand	Respiratory	ST147	no	no	SAMN54588861	ybt 9; ICEKp3	173-4LV	-	0	-	0	-	0	-	0	-	-	NDM-1	CTX-M-15	aadA*;aph(3')-VI	-	-	qnrS1	-	catB3.v2	arr-3	sul1	-	-	-	OXA-1;OXA-9.v1	-	SHV-11^	35Q	OmpK35-25%	-	GyrA-83I;ParC-80I	KL64	K64	-	Typeable	100.00%	-	O1/O2v1	O2a	-	Typeable
792067	2019-08-17	Thailand	Surveillance	ST147	no	no	SAMN54588863	ybt 9; ICEKp3	173-4LV	-	0	-	0	-	0	-	0	-	-	NDM-1	CTX-M-15	aadA*;aph(3')-VI	-	-	qnrS1	-	catB3.v2	arr-3	sul1	-	-	-	OXA-1;OXA-9.v1	-	SHV-11^	35Q	OmpK35-25%	-	GyrA-83I;ParC-80I	KL64	K64	-	Typeable	100.00%	-	O1/O2v1	O2a	-	Typeable
792121	2019-09-01	Thailand	Respiratory	ST147	no	no	SAMN54588869	ybt 9; ICEKp3	173-4LV	-	0	-	0	-	0	-	0	-	-	NDM-1	CTX-M-15	aadA*;aph(3')-VI	-	-	qnrS1	-	catB3.v2	arr-3	sul1	-	-	-	OXA-1;OXA-9.v1	-	SHV-11^	35Q	OmpK35-25%	-	GyrA-83I;ParC-80I	KL64	K64	-	Typeable	100.00%	-	O1/O2v1	O2a	-	Typeable
689660	2018-09-26	Thailand	Urine	ST152	no	no	SAMN54588723	-	0	-	0	-	0	-	0	-	0	-	-	-	SHV-12	aac(3)-IId^;aph3-Ia.v1^;strA.v1^;strB.v1	-	-	qnrS1	-	floR.v2*	-	sul2	tet(A).v1?	-	dfrA14.v2*	-	-	-	-	-	-	GyrA-83I;ParC-80I	KL105	unknown (KL105)	!	Typeable	99.06%	-	O3b	O3b	-	Typeable
727475	2018-04-20	Thailand	Urine	ST16	no	no	SAMN54588749	-	0	-	0	-	0	-	0	-	0	-	-	NDM-1	CTX-M-15	aac(3)-IId^	-	-	-	Mrx;ermB.v1*;mphA	-	-	sul1	tet(B).v2*;tetR*	-	dfrA12	CMY-2.v2;OXA-9.v1	-	SHV-1	-	OmpK35-76%	-	GyrA-83F;GyrA-87N;ParC-84K	KL51	K51	-	Typeable	99.97%	-	O3b	O3b	!	Typeable
792139	2019-10-01	Thailand	Urine	ST147	no	no	SAMN54588870	ybt 9; ICEKp3	173-4LV	-	0	-	0	-	0	-	0	-	-	NDM-1	CTX-M-15	aadA*;aph(3')-VI	-	-	qnrS1	-	catB3.v2	arr-3	sul1	-	-	-	OXA-1;OXA-9.v1	-	SHV-11^	35Q	OmpK35-25%	-	GyrA-83I;ParC-80I	KL64	K64	-	Typeable	100.00%	-	O1/O2v1	O2a	-	Typeable
728793	2018-03-20	Thailand	Urine	ST16	no	no	SAMN54588760	ybt 9; ICEKp3 (truncated)	174-1LV	-	0	-	0	-	0	-	0	-	-	NDM-1	CTX-M-15	aac(3)-IId^;aadA2^	-	-	-	Mrx;ermB.v1*;mphA	-	-	sul1	tet(B).v2*;tetR*	-	dfrA12	CMY-2.v2;OXA-9.v1	-	SHV-1	-	OmpK35-76%	-	GyrA-83F;GyrA-87N;ParC-84K	KL51	K51	-	Typeable	99.97%	-	O3b	O3b	-	Typeable
728961	2018-05-17	Thailand	Urine	ST16	no	no	SAMN54588777	-	0	-	0	-	0	-	0	-	0	-	-	NDM-1	CTX-M-15	aac(3)-IId^;aadA2^	-	-	-	Mrx;ermB.v1*;mphA	-	-	sul1	tet(B).v2*;tetR*	-	dfrA12	CMY-2.v2;OXA-9.v1	-	SHV-1	-	OmpK35-76%	-	GyrA-83F;GyrA-87N;ParC-84K	KL51	K51	-	Typeable	99.97%	-	O3b	O3b	!	Typeable
728769	2018-04-23	Thailand	Urine	ST16	no	no	SAMN54588757	ybt 9; ICEKp3	174-1LV	-	0	-	0	-	0	-	0	-	-	NDM-1	CTX-M-15	aadA22^;aadA2^	-	-	-	-	-	-	sul1	tet(B).v2*;tetR*	-	dfrA12	CMY-2.v2	-	SHV-1	-	OmpK35-76%	-	GyrA-83F;GyrA-87N;ParC-84K	KL51	K51	?3	Typeable	99.95%	-	O3b	O3b	-	Typeable
728785	2018-04-13	Thailand	Urine	ST16	no	no	SAMN54588759	-	0	-	0	-	0	-	0	-	0	-	-	NDM-1	CTX-M-15	aac(3)-IId^;aadA22;aadA2^	-	-	-	Mrx;ermB.v1*;mphA	-	-	sul1	tet(B).v2*;tetR*	-	dfrA12	CMY-2.v2	-	SHV-1	-	OmpK35-76%	-	GyrA-83F;GyrA-87N;ParC-84K	KL51	K51	?3	Typeable	99.98%	-	O3b	O3b	!	Typeable
729037	2018-05-25	Thailand	Urine	ST16	no	no	SAMN54588784	ybt 9; ICEKp3 (truncated)	174-1LV	-	0	-	0	-	0	-	0	-	-	NDM-1	CTX-M-15	aadA22^;aadA2^	-	-	-	-	-	-	sul1	tet(B).v2*;tetR*	-	dfrA12	CMY-2.v2	-	SHV-1	-	OmpK35-76%	-	GyrA-83F;GyrA-87N;ParC-84K	KL51	K51	?3	Typeable	99.95%	-	O3b	O3b	-	Typeable
792155	2019-09-18	Thailand	Surveillance	ST147	no	no	SAMN54588872	ybt 9; ICEKp3	173-4LV	-	0	-	0	-	0	-	0	-	-	NDM-1	CTX-M-15	aadA*;aph(3')-VI	-	-	qnrS1	-	catB3.v2	arr-3	sul1	-	-	-	OXA-1;OXA-9.v1	-	SHV-11^	35Q	OmpK35-25%	-	GyrA-83I;ParC-80I	KL64	K64	-	Typeable	99.99%	-	O1/O2v1	O2a	-	Typeable
792171	2019-10-02	Thailand	Respiratory	ST147	no	no	SAMN54588874	ybt 9; ICEKp3	173-4LV	-	0	-	0	-	0	-	0	-	-	NDM-1	CTX-M-15	aadA*;aph(3')-VI	-	-	qnrS1	-	catB3.v2	arr-3	sul1	-	-	-	OXA-1;OXA-9.v1	-	SHV-11^	35Q	OmpK35-25%	-	GyrA-83I;ParC-80I	KL64	K64	-	Typeable	100.00%	-	O1/O2v1	O2a	-	Typeable
792189	2019-10-15	Thailand	Surveillance	ST147	no	no	SAMN54588875	ybt 9; ICEKp3	173-4LV	-	0	-	0	-	0	-	0	-	-	NDM-1	CTX-M-15	aadA*;aph(3')-VI	-	-	qnrS1	-	catB3.v2	arr-3	sul1	-	-	-	OXA-1;OXA-9.v1	-	SHV-11^	35Q	OmpK35-25%	-	GyrA-83I;ParC-80I	KL64	K64	-	Typeable	99.99%	-	O1/O2v1	O2a	-	Typeable
792197	2019-10-09	Thailand	Surveillance	ST147	no	no	SAMN54588876	ybt 9; ICEKp3	173-3LV	-	0	-	0	-	0	-	0	-	-	NDM-1	CTX-M-15	aadA*;aph(3')-VI	-	-	qnrS1	-	catB3.v2	arr-3	sul1	-	-	-	OXA-1;OXA-9.v1	-	SHV-11^	35Q	OmpK35-25%	-	GyrA-83I;ParC-80I	KL64	K64	-	Typeable	100.00%	-	O1/O2v1	O2a	-	Typeable
792219	2019-10-07	Thailand	Surveillance	ST147	no	no	SAMN54588878	ybt 9; ICEKp3	173-4LV	-	0	-	0	-	0	-	0	-	-	NDM-1	CTX-M-15	aadA*;aph(3')-VI	-	-	qnrS1	-	catB3.v2	arr-3	sul1	-	-	-	OXA-1;OXA-9.v1	-	SHV-11^	35Q	OmpK35-25%	-	GyrA-83I;ParC-80I	KL64	K64	-	Typeable	100.00%	-	O1/O2v1	O2a	-	Typeable
817510	2019-12-02	Thailand	Urine	ST147	no	no	SAMN54588967	ybt 9; ICEKp3	173-4LV	-	0	-	0	-	0	-	0	-	-	NDM-1	CTX-M-15	aadA*;aph(3')-VI	-	-	qnrS1	-	catB3.v2	arr-3	sul1	-	-	-	OXA-1;OXA-9.v1	-	SHV-11^	35Q	OmpK35-25%	-	GyrA-83I;ParC-80I	KL64	K64	-	Typeable	100.00%	-	O1/O2v1	O2a	-	Typeable
817552	2019-10-16	Thailand	Urine	ST147	no	no	SAMN54588971	ybt 9; ICEKp3	173-4LV	-	0	-	0	-	0	-	0	-	-	NDM-1	CTX-M-15	aadA*;aph(3')-VI	-	-	qnrS1	-	catB3.v2	arr-3	sul1	-	-	-	OXA-1;OXA-9.v1	-	SHV-11^	35Q	OmpK35-25%	-	GyrA-83I;ParC-80I	KL64	K64	-	Typeable	100.00%	-	O1/O2v1	O2a	-	Typeable
817578	2019-11-05	Thailand	Urine	ST147	no	no	SAMN54588973	ybt 9; ICEKp3	173-4LV	-	0	-	0	-	0	-	0	-	-	NDM-1	CTX-M-15	aadA*;aph(3')-VI	-	-	qnrS1	-	catB3.v2	arr-3	sul1	-	-	-	OXA-1;OXA-9.v1	-	SHV-11^	35Q	OmpK35-25%	-	GyrA-83I;ParC-80I	KL64	K64	-	Typeable	100.00%	-	O1/O2v1	O2a	-	Typeable
977221	2019-12-23	Thailand	Unknown	ST147	no	no	SAMN54589441	ybt 9; ICEKp?	584-3LV	-	0	-	0	-	0	-	0	-	-	NDM-1	CTX-M-15	aadA*;aadA2^;aph(3')-VI;aph3-Ia.v1^	-	-	qnrS1	Mrx;mphA	catB3.v2	arr-3	sul1	tet(A).v1	-	dfrA12	OXA-1;OXA-9.v1	-	SHV-11^	35Q	OmpK35-25%	-	GyrA-83I;ParC-80I	KL64	K64	-	Typeable	100.00%	-	O1/O2v1	O2a	-	Typeable
817528	2019-12-10	Thailand	Urine	ST147	no	no	SAMN54588968	ybt 9; ICEKp3	173-2LV	-	0	-	0	-	0	-	0	-	-	NDM-1	CTX-M-15	aadA2^;aph(3')-VI;armA	-	-	qnrB1.v2^	mphE.v2^;msrE	-	-	sul1	tet(D)	-	dfrA12;dfrA14.v2*	OXA-1	-	SHV-11^	35Q	OmpK35-25%	-	GyrA-83I;ParC-80I	KL64	K64	-	Typeable	100.00%	-	O1/O2v1	O2a	-	Typeable
817544	2019-12-16	Thailand	Surveillance	ST147	no	no	SAMN54588970	ybt 10; ICEKp4	78	-	0	-	0	-	0	-	0	-	-	NDM-1	CTX-M-15	aac(3)-IIa.v1^;aac(6')-Ib-cr.v2;aadA*;aadA2^;aph3-Ia.v1^	-	-	-	Mrx;ereA2*;mphA	cmlA5	arr-2	sul1	tet(A).v1	-	dfrA12	OXA-1	-	SHV-11^	35Q	-	-	GyrA-83Y;GyrA-87A;ParC-80I	KL10	K10	?3	Typeable	99.03%	-	O3/O3a	O3/O3a	?4	Typeable
977117	2019-12-21	Thailand	Unknown	ST147	no	no	SAMN54589440	ybt 9; ICEKp3	173-2LV	-	0	-	0	-	0	-	0	-	-	NDM-1	CTX-M-15	aadA2^;aph(3')-VI;armA	-	-	qnrB1.v2^	mphE.v2^;msrE	-	-	sul1	tet(D)	-	dfrA12;dfrA14.v2*	OXA-1	-	SHV-11^	35Q	OmpK35-25%;OmpK36-8%	-	GyrA-83I;ParC-80I	KL64	K64	-	Typeable	100.00%	-	O1/O2v1	O2a	-	Typeable
977239	2019-12-23	Thailand	Unknown	ST147	no	no	SAMN54589442	ybt 10; ICEKp4	78	-	0	-	0	-	0	-	0	-	-	NDM-1	CTX-M-15	aac(3)-IIa.v1^;aac(6')-Ib-cr.v2;aadA*;aadA2^;aph3-Ia.v1^	-	-	-	Mrx;ereA2*;mphA	cmlA5	arr-2	sul1	tet(A).v1	-	dfrA12	OXA-1	-	SHV-11^	35Q	-	-	GyrA-83Y;GyrA-87A;ParC-80I	KL10	K10	?3	Typeable	99.03%	-	O3/O3a	O3/O3a	?4	Typeable
817536	2019-12-13	Thailand	Surveillance	ST147	no	no	SAMN54588969	ybt 9; ICEKp3	173-2LV	-	0	-	0	-	0	-	0	-	-	NDM-1	CTX-M-15	aadA2^;aph(3')-VI;armA	-	-	qnrB1.v2^	mphE.v2^;msrE	-	-	sul1	tet(D)	-	dfrA12;dfrA14.v2*	-	-	SHV-11^	35Q	OmpK35-25%	-	GyrA-83I;ParC-80I	KL64	K64	-	Typeable	100.00%	-	O1/O2v1	O2a	-	Typeable
791925	2019-08-13	Thailand	Surveillance	ST147	no	no	SAMN54588849	ybt 9; ICEKp3	173-4LV	-	0	-	0	-	0	-	0	-	-	NDM-1	-	aadA*;aph(3')-VI	-	-	-	-	catB3.v2	arr-3	sul1	-	-	-	OXA-1;OXA-9.v1	-	SHV-11^	35Q	OmpK35-25%	-	GyrA-83I;ParC-80I	KL64	K64	-	Typeable	100.00%	-	O1/O2v1	O2a	-	Typeable
792009	2019-08-21	Thailand	Surveillance	ST147	no	no	SAMN54588857	ybt 9; ICEKp3	173-4LV	-	0	-	0	-	0	-	0	-	-	NDM-1	-	aadA*;aph(3')-VI	-	-	-	-	catB3.v2	arr-3	sul1	-	-	-	OXA-1;OXA-9.v1	-	SHV-11^	35Q	OmpK35-25%	-	GyrA-83I;ParC-80I	KL64	K64	-	Typeable	100.00%	-	O1/O2v1	O2a	-	Typeable
792025	2019-08-21	Thailand	Urine	ST147	no	no	SAMN54588859	ybt 9; ICEKp3	173-4LV	-	0	-	0	-	0	-	0	-	-	NDM-1	-	aadA*;aph(3')-VI	-	-	-	-	catB3.v2	arr-3	sul1	-	-	-	OXA-1;OXA-9.v1	-	SHV-11^	35Q	OmpK35-25%	-	GyrA-83I;ParC-80I	KL64	K64	-	Typeable	100.00%	-	O1/O2v1	O2a	-	Typeable
792075	2019-08-28	Thailand	Urine	ST147	no	no	SAMN54588864	ybt 9; ICEKp3	173-4LV	-	0	-	0	-	0	-	0	-	-	NDM-1	-	aadA*;aph(3')-VI	-	-	-	-	catB3.v2	arr-3	sul1	-	-	-	OXA-1;OXA-9.v1	-	SHV-11^	35Q	OmpK35-25%	-	GyrA-83I;ParC-80I	KL64	K64	-	Typeable	100.00%	-	O1/O2v1	O2a	-	Typeable
792083	2019-08-28	Thailand	Surveillance	ST147	no	no	SAMN54588865	ybt 9; ICEKp3	173-4LV	-	0	-	0	-	0	-	0	-	-	NDM-1	-	aadA*;aph(3')-VI	-	-	-	-	catB3.v2	arr-3	sul1	-	-	-	OXA-1;OXA-9.v1	-	SHV-11^	35Q	OmpK35-25%	-	GyrA-83I;ParC-80I	KL64	K64	-	Typeable	100.00%	-	O1/O2v1	O2a	-	Typeable
792105	2019-08-13	Thailand	Surveillance	ST147	no	no	SAMN54588867	ybt 9; ICEKp3	173-4LV	-	0	-	0	-	0	-	0	-	-	NDM-1	-	aadA*;aph(3')-VI	-	-	-	-	catB3.v2	arr-3	sul1	-	-	-	OXA-1;OXA-9.v1	-	SHV-11^	35Q	OmpK35-25%	-	GyrA-83I;ParC-80I	KL64	K64	-	Typeable	100.00%	-	O1/O2v1	O2a	-	Typeable
792113	2019-08-13	Thailand	Surveillance	ST147	no	no	SAMN54588868	ybt 9; ICEKp3	173-4LV	-	0	-	0	-	0	-	0	-	-	NDM-1	-	aac(6')-Ib-cr.v2;aph(3')-VI	-	-	-	-	catB3.v2	arr-3	sul1	-	-	-	OXA-1	-	SHV-11^	35Q	OmpK35-25%	-	GyrA-83I;ParC-80I	KL64	K64	-	Typeable	100.00%	-	O1/O2v1	O2a	-	Typeable
817704	2019-09-01	Thailand	Wound	ST147	no	no	SAMN54588984	-	0	-	0	-	0	-	0	-	0	-	-	-	CTX-M-15	strA.v1^;strB.v1	-	-	qnrB1.v2^	-	-	-	sul2	-	-	dfrA14.v2*	TEM-1D.v1^	-	SHV-11^	35Q	-	-	GyrA-83I;ParC-80I	KL64	K64	-	Typeable	100.00%	-	O1/O2v1	O2a	-	Typeable
791563	2019-06-20	Thailand	Respiratory	ST147	no	no	SAMN54588813	ybt 9; ICEKp3	173-4LV	-	0	-	0	-	0	-	0	-	-	-	-	aadA*	-	-	-	-	-	-	-	-	-	-	OXA-9.v1	-	SHV-11^	35Q	OmpK35-25%	-	GyrA-83I;ParC-80I	KL64	K64	-	Typeable	100.00%	-	O1/O2v1	O2a	-	Typeable
791829	2019-08-26	Thailand	Surveillance	ST147	no	no	SAMN54588839	ybt 9; ICEKp3	173-4LV	-	0	-	0	-	0	-	0	-	-	-	-	aadA*	-	-	-	-	-	-	-	-	-	-	OXA-9.v1	-	SHV-11^	35Q	OmpK35-25%	-	GyrA-83I;ParC-80I	KL64	K64	-	Typeable	99.99%	-	O1/O2v1	O2a	-	Typeable
791773	2019-05-23	Thailand	Respiratory	ST15	no	no	SAMN54588834	-	0	-	0	-	0	-	0	-	0	-	-	KPC-2	CTX-M-15	aac(6')-Ib-cr.v2;aadA2^;aph3-Ia.v1^	-	-	-	Mrx;mphA	-	-	sul1	tet(A).v1	-	dfrA12	OXA-1;TEM-1D.v1^	-	SHV-28^	-	-	-	GyrA-83F;GyrA-87A;ParC-80I	KL112	unknown (KL112)	-	Typeable	99.53%	-	O1/O2v1	O1ab	-	Typeable
791483	2019-07-08	Thailand	Surveillance	ST16	no	no	SAMN54588805	ybt 9; ICEKp3	174	-	0	-	0	-	0	-	0	-	-	NDM-1;OXA-232	CTX-M-15	aadA2^	-	-	-	-	-	-	sul1	tet(B).v2*;tetR*	-	dfrA12	OXA-9.v1;TEM-1D.v1^	-	SHV-1	-	OmpK35-76%	-	GyrA-83F;GyrA-87N;ParC-84K	KL51	K51	-	Typeable	99.98%	-	O3b	O3b	-	Typeable
791917	2019-08-14	Thailand	Urine	ST16	no	no	SAMN54588848	ybt 9; ICEKp3	174	-	0	-	0	-	0	-	0	-	-	NDM-1;OXA-232	CTX-M-15	aadA2^	-	-	-	-	-	-	sul1	tet(B).v2*;tetR*	-	dfrA12	OXA-9.v1;TEM-1D.v1^	-	SHV-1	-	OmpK35-76%	-	GyrA-83F;GyrA-87N;ParC-84K	KL51	K51	-	Typeable	99.98%	-	O3b	O3b	-	Typeable
791933	2019-08-14	Thailand	Surveillance	ST16	no	no	SAMN54588850	ybt 9; ICEKp3	174	-	0	-	0	-	0	-	0	-	-	NDM-1;OXA-232	CTX-M-15	aadA2^	-	-	-	-	-	-	sul1	tet(B).v2*;tetR*	-	dfrA12	OXA-9.v1;TEM-1D.v1^	-	SHV-1	-	OmpK35-76%	-	GyrA-83F;GyrA-87N;ParC-84K	KL51	K51	-	Typeable	99.98%	-	O3b	O3b	-	Typeable
791967	2019-08-07	Thailand	Surveillance	ST16	no	no	SAMN54588853	ybt 9; ICEKp3	174	-	0	-	0	-	0	-	0	-	-	NDM-1;OXA-232	CTX-M-15	aadA2^	-	-	-	-	-	-	sul1	tet(B).v2*;tetR*	-	dfrA12	OXA-9.v1;TEM-1D.v1^	-	SHV-1	-	OmpK35-76%	-	GyrA-83F;GyrA-87N;ParC-84K	KL51	K51	-	Typeable	99.98%	-	O3b	O3b	-	Typeable
791975	2019-08-07	Thailand	Urine	ST16	no	no	SAMN54588854	ybt 9; ICEKp3	174	-	0	-	0	-	0	-	0	-	-	NDM-1;OXA-232	CTX-M-15	aadA2^	-	-	-	-	-	-	-	tet(B).v2*;tetR*	-	dfrA12	OXA-9.v1;TEM-1D.v1^	-	SHV-1	-	OmpK35-76%	-	GyrA-83F;GyrA-87N;ParC-84K	KL51	K51	-	Typeable	99.98%	-	O3b	O3b	-	Typeable
[truncated: 145 more rows]
[truncated: 47 more columns]
