# Supplementary material for: Preferred evolutionary routes of convergence in Klebsiella pneumoniae favor siderophore acquisition over hypervirulence
Source: Research Square preprint supplement (doi:10.21203/rs.3.rs-8613390/v1), 2026-02-13
Supplement: Supplementary file 2 [file 73835f48fabad62cf0cb6494.xlsx]

## Sheet: Sheet1
Isolate ID	Convergent events	Lineage	MLST	Collection Date	Country of Collection	siderophore µg/mL	In vivo phenotype	Count	Inoculum	Mortality	LD50	Aerobactin	Salmochelin	RmpADC	rmpA2	peg-344	ESBL	Carb	iuc	iro	rmpADC	rmpA2	peg-344	Amikacin	Gentamicin	Tobramycin	Amp/sulbactam	Aztreonam	Cefazolin (CFZ) - 1st	Ceftazidime (CAZ) - 3rd	Ceftriaxone (CRO) - 3rd	Cefepime	Imipenem	Meropenem	Levofloxacin	Ciprofloxacin	Nitrofurantoin	Piperacillin/Tazobactam	Trimethoprim-Sulphamethoxazole
474269	A	hvKp	ST-23-KL1	2016-03-30	United States	148.167	hvKp1	5	1700	5/5	10	iuc1	iro1	rmp1; KpVP-1	rmpA2	peg-344	CTX-M-15	-	iuc1	iro 1	rmp 1; KpVP-1	rmpA2 ONT data	peg-344	S	R	R	R	R	R	R	R	R	S	S	S	S	I	S	R
582610	B	hvKp	ST-268	2017-10-10	Thailand	113.5	hvKp1	5	2150	5/5	186.2	iuc1	iro1	rmp1; KpVP-1	rmpA2_8*	peg-344	CTX-M-15	-	iuc1	iro 1	rmp 1; KpVP-1	rmpA2_8*	peg-344	S	S	I	R	R	R	I	R	R	S	S	S	S	R	R	R
976583	C	hvkp	ST-65	2021-07-09	Thailand	40.64	hvKp	5	6450	5/5	10	iuc1	iro1	rmp1; KpVP-1 (truncated)	rmpA2	peg-344	SHV-2A	-						S	S	S	I	S	R	S	S	S	S	S	I	I	R	S	S
817640	D	hvkp	ST-420	2019-09-01	Thailand	179.5	hvKp	5	39500000	5/5	1840	iuc1	iro1	rmp1; KpVP-1	rmpA2_6*-55%	peg-344	CTX-M-15	-						S	R	S	R	I	R	R	R	R	S	S	S	S	R	S	R
740859	E	cKp	ST23-KL57	2019-12-15	Ukraine	112.8	cKp	5	18500000	0/5	>1.00E+09	iuc1	-	rmp1; KpVP-1 (truncated)	rmpA2_8*-60%	peg-344	CTX-M-55	NDM-1	iuc1	-	rmp 1; KpVP-1	rmpA2_8*-60%	peg-344	I	R	R	R	R	R	R	R	R	R	R	R	R	R	R	R
908343	F	cKp	ST-23-KL57	2021-01-11	Georgia	87.84	cKp	5	18500000	0/5	>1.00E+09	iuc1	-	-	rmpA2_8*-60%	peg-344	CTX-M-15	NDM-5,OXA-48	iuc1	-	-	rmpA2_8*-60%	peg-344	R	R	R	R	R	R	R	R	R	R	R	R	R	R	R	R
102024	G	cKp	ST-218	2021-09-21	Kenya	222.613	cKp	5	45000000	0/5	1000000000	iuc1	iro1	rmp1; KpVP-1 (truncated)	rmpA2_2*-47%	peg-344	CTX-M-15	-	iuc1	iro 1	rmp 1; KpVP-1	rmpA2_2*-47%	peg-344	I	R	R	R	R	R	I	R	R	S	S	S	S	R	S	R
821202	H	cKp	ST-395	2020-01-20	Ukraine	163.15	cKp	5	31500000	0/5	1000000000	iuc1	-	rmp1; KpVP-1	rmpA2_6*-47%	peg-344	CTX-M-15	-	iuc1	-	rmp 1; KpVP-1	rmpA2_6*-47%	peg-344	S	S	I	R	R	R	R	R	R	S	S	R	R	R	R	R
803958	I	cKp	ST-395	2018-02-22	Georgia	133.6	cKp	5	36500000	0.2	464000000	iuc1	-	-	rmpA2	-	CTX-M-15	OXA-48	iuc1	-	-	rmpA2 ONT data	-	R	R	R	R	R	R	R	R	R	S	I	R	R	R	R	R
12964	J	cKp	ST-490	2012-11-11	United States	50.87	cKp1	5	11500000	0/5	1000000000	iuc1	-	-	rmpA2_5*-47%	-	CTX-M-15	-	iuc1	-	-	rmpA2_3*-47%	-	S	R	R	R	R	R	R	R	R	S	S	R	R	R	R	R
489775	K	cKp	ST-392	2015-03-26	Ukraine	110.487	cKp1	5	17500000	0/5	1000000000	iuc1	-	-	rmpA2_6*-56%	-	CTX-M-15	OXA-48	iuc1	-	-	rmpA2 ONT data	-	S	R	R	R	R	R	R	R	R	R	R	R	R	R	R	R
804398	L	cKp	ST-48	2019-02-07	Georgia	134.8	cKp	5	23500000	0.2	299000000	iuc1	-	-	rmpA2	-	CTX-M-15	NDM-5	iuc1	-	-	rmpA2 ONT data	-	S	R	R	R	R	R	R	R	R	R	R	R	R	R	R	R
1004755	M	cKp	ST-15	2019-01-09	Georgia	156.5	cKp	5	36500000	0/5	1000000000	iuc1	-	-	rmpA2	-	CTX-M-15	OXA-48	iuc1	-	-	rmpA2 ONT data	-	S	S	R	R	R	R	R	R	R	R	R	R	R	I	R	R
516343	N	cKp	ST-307	2016-05-04	Jordan	182.945	cKp1	5	17500000	0/5	1000000000	iuc1	-	-	rmpA2_8*-60%	-	CTX-M-15	-	iuc1	-	-	rmpA2_8*-60%	-	S	R	R	R	R	R	R	R	R	S	S	R	R	I	S	R
517485	O	cKp	ST-1399	2014-12-15	Jordan	243.115	cKp1	5	21000000	0/5	1000000000	iuc1	-	-	rmpA2	-	CTX-M-15	-	iuc1	-	-	rmpA2 ONT data	-	I	R	R	R	R	R	R	R	R	S	S	R	R	R	R	R
1005419	P	cKp	ST-395	2021-07-27	Georgia	111.8	cKp	5	17500000	0/5	1000000000	iuc3	-	-	-	-	CTX-M-15	NDM-5	iuc3	-	-	-	-	I	S	R	R	R	R	R	R	R	R	R	R	R	R	R	R
875282	Q	cKp	ST-147	2018-03-20	Peru	62.57	cKp	5	46500000	0/5	1000000000	iuc5	-	-	-	-	CTX-M-15,TEM-26	NDM-1	iuc5	-	-	-	-	S	R	R	R	R	R	R	R	R	R	R	R	R	R	R	R
976365	R	cKp	ST-111	2021-06-13	Thailand	49.24	cKp	5	53000000	0.6	25200000	iuc3	-	-	-	-	CTX-M-55	-						S	R	I	I	R	R	R	R	R	S	S	S	I	R	S	R
977691	S	cKp	ST-17	2020-01-09	Thailand	57.42	cKp	5	41500000	0/5	1000000000	iuc3	-	-	-	-	CTX-M-63	-	iuc3	-	-	-	-	S	S	S	R	S	R	S	R	R	S	S	I	I	I	S	R
511092	T	cKp	ST-14	2014-02-19	Jordan	84.18	cKp	5	34000000	0.6	15000000	iuc5	-	-	-	-	CTX-M-15	-	iuc5	-	-	-	-	S	S	S	R	R	R	R	R	R	S	S	S	S	I	S	R
976461	U	cKp	ST-37	2021-06-20	Thailand	38.48	cKp	5	47000000	0.2	598000000	iuc5	-	-	-	-	CTX-M-55	-	iuc5	-	-	-	-	S	R	I	I	R	R	R	R	R	S	S	S	S	R	S	R
365590	V	cKp	ST-2071	2016-01-27	Thailand	34.02	cKp	5	52500000	0/5	1000000000	iuc5	-	-	-	-	CTX-M-15	NDM-1	iuc5	-	-	-	-	R	R	R	R	R	R	R	R	R	R	R	R	R	R	R	R
368311	W	cKp	ST-231	2015-11-16	Kenya	46.36	cKp	5	39500000	0/5	1000000000	iuc5	-	-	-	-	-	OXA-232	iuc5	-	-	-	-	R	R	R	R	R	R	R	R	R	R	R	R	R	R	R	R
480738	X	cKp	ST-45	2017-05-29	Thailand	98.7433	cKp1	5	21500000	0.2	274500000	iuc3	-	-	-	-	CTX-M-55	-	iuc3	-	-	-	-	S	R	I	R	R	R	R	R	R	S	S	S	S	S	R	S
862392	Y	cKp	ST-25	2020-03-27	Georgia	7.384	cKp	5	46000000	0.4	96800000	iuc3	iro3 (truncated)	rmp3; ICEKp1 (truncated)	-	peg-344	-	NDM-5	iuc3	iro 3	rmp 3; ICEKp1	-	peg-344	S	S	S	R	R	R	R	R	R	R	R	S	S	I	R	S
1. Russo TA, Alvarado CL, Davies CJ, Drayer ZJ, Carlino-MacDonald U, Hutson A, et al Differentiation of hypervirulent and classical Klebsiella pneumoniae with acquired drug resistance. mBio 2024 Feb 14; 15(2):e02867-23.
