# Supplementary material for: Preferred evolutionary routes of convergence in Klebsiella pneumoniae favor siderophore acquisition over hypervirulence
Source: Research Square preprint supplement (doi:10.21203/rs.3.rs-8613390/v1), 2026-02-13
Supplement: Supplementary file 3 [file d82c48cd2b710677350df7d9.xlsx]

## Sheet: This study n=173 plasmids
Strain	Contig (strain_plasmid)	ST	Length (bp)	Rep Type	Molecular typing and prediction of virulence and resistance genes from Kleborate (17)
					pC	Aerobactin	AbST	Salmochelin	SmST	RmpADC	RmST	rmpA2	peg-344*	Carbapenemase acquired	ESBL acquired	Aminoglycoside acquired	Col_acquired	Fcyn_acquired	Flq_acquired	MLS_acquired	Phe_acquired	Rif_acquired	Sul_acquired	Tet_acquired	Tmt_acquired	Bla_acquired	SHV_mutations	truncated_resistance_hits	spurious_resistance_hits
1005401	1005401_p4	395	8351	IncQ1	-1	-	0	-	0	-	0	-		-	-	aph(3')-VIa*	-	-	-	-	-	-	-	-	-	-	-	-	aph(6)-Id.v2?-0%
1005401	1005401_p5	395	5010	no rep type detected	-1	-	0	-	0	-	0	-		-	-	-	-	-	-	-	-	-	-	-	-	-	-	-	-
1005401	1005401_p6	395	16660	no rep type detected	-1	-	0	-	0	-	0	-		NDM-1	-	aph(3')-Vla*			qnrS1
1005419	1005419_p2	395	177351	IncFIB(AP001918)/IncFII(K)/ColRNAI	-1	iuc 3	88	-	0	-	0	-		-	-	-	-	-	-	-	-	-	-	-	-	-	-	-	-
1005419	1005419_p5	395	6870	ColRNAI/Col440II	-1	-	0	-	0	-	0	-		-	-	-	-	-	-	-	-	-	-	-	-	-	-	-	-
1005419	1005419_p4	395	5010	no rep type detected	-1	-	0	-	0	-	0	-		-	-	-	-	-	-	-	-	-	-	-	-	-	-	-	-
1005637	1005637_p4	395	5010	no rep type detected	-1	-	0	-	0	-	0	-		-	-	-	-	-	-	-	-	-	-	-	-	-	-	-	-
102622	102622_p4	395	8351	IncQ1	-1	-	0	-	0	-	0	-		-	-	aph(3')-VIa*	-	-	-	-	-	-	-	-	-	-	-	-	strB.v1?-0%
21831	21831_p1	380	161109	IncFII/IncFIB(K)	-1	iuc 2	14	iro 2 (truncated)	12	rmp 2; KpVP-2	7	-		-	-	-	-	-	-	-	-	-	-	-	-	-	-	-	-
23620	23620_p3	23-KL1	35067	no rep type detected	-1	-	0	-	0	-	0	-		-	-	-	-	-	-	-	-	-	-	-	-	-	-	-	-
365590	365590_p2	2071	73769	IncFIA/IncFII(pAMA1167-NDM-5)	-1	iuc 5	61-3LV	-	0	-	0	-		-	-	aadA2^	-	-	-	ermB.v1*;mphA	-	-	sul1	-	dfrA12	-	-	-	-
365590	365590_p4	2071	7819	Col440I	-1	-	0	-	0	-	0	-		-	-	-	-	-	-	-	-	-	-	-	-	-	-	-	-
368311	368311_p2	231	73271	IncFIA/IncFII(pAMA1167-NDM-5)	-1	iuc 5	61-3LV	-	0	-	0	-		-	-	aadA2^	-	-	-	ermB.v1*;mphA	-	-	sul1	-	dfrA12	-	-	-	-
368311	368311_p5	231	6141	ColKP3	-1	-	0	-	0	-	0	-		OXA-232 exact (contig break)	-	-	-	-	-	-	-	-	-	-	-	-	-	-	OXA-181?-64%
368311	368311_p3	231	7819	Col440I	-1	-	0	-	0	-	0	-		-	-	-	-	-	-	-	-	-	-	-	-	-	-	-	-
368311	368311_p1	231	142764	IncFII(K)/IncFIB(pQil)	-1	-	0	-	0	-	0	-		-	-	aac(6')-Ib;rmtF	-	-	qnrS1	-	catA1^	arr-2	-	-	-	TEM-1D.v1^	-	-	-
480738	480738_p5	45	10046	IncX4	-1	-	0	-	0	-	0	-		-	-	-	mcr-1.1^	-	-	-	-	-	-	-	-	-	-	-	-
480738	480738_p1	45	211312	IncFII(K)/IncFIB(K)	-1	iuc 3	32-1LV	-	0	-	0	-		-	-	aac(3)-IIa.v1^;strA.v1^;strB.v1	-	-	-	-	floR.v2*	-	sul2	tet(A).v2	-	-	-	-	-
489766	489766_p2	23-KL1	95199	IncFIA(HI1)/IncFII	-1	-	0	-	0	-	0	-		-	-	-	-	-	-	-	-	-	-	-	-	-	-	-	-
505107	505107_p2	592	87856	FIA(pBK30683)	-1	-	0	-	0	-	0	-		-	-	-	-	-	-	-	-	-	-	-	-	-	-	-	-
511092	511092_p3	14	37031	IncFIA(HI1)	-1	-	0	-	0	-	0	-		-	-	-	-	-	-	-	-	-	-	-	-	-	-	-	-
512745	512745_p2	592	87856	FIA(pBK30683)	-1	-	0	-	0	-	0	-		-	-	-	-	-	-	-	-	-	-	-	-	-	-	-	-
515432	515432_p2	1399	97507	IncFIB(pQil)/IncFII(K)	-1	-	0	-	0	-	0	-		-	SHV-12^	aac(6')-Ib'.v1	-	-	-	-	-	-	-	-	-	-	238S;240K;35Q	-	-
515432	515432_p6	1399	26228	IncFIA(HI1)	-1	-	0	-	0	-	0	-		-	CTX-M-15	-	-	-	-	-	-	-	-	-	-	TEM-1D.v1^	-	-	-
515432	515432_p7	1399	5509	no rep type detected	-1	-	0	-	0	-	0	-		-	-	-	-	-	-	-	-	-	-	-	-	-	-	-	-
517485	517485_p6	1399	26229	IncFIA(HI1)	-1	-	0	-	0	-	0	-		-	CTX-M-15	-	-	-	-	-	-	-	-	-	-	TEM-1D.v1^	-	-	-
740859	740859_p2	23-KL57	111851	IncFIB(pB171)/IncFII(Yp)	-1	-	0	-	0	-	0	-		NDM-1	-	rmtC	-	-	-	-	-	-	sul1*	-	-	-	-	-	-
803958	803958_p5	395	5010	no rep type detected	-1	-	0	-	0	-	0	-		-	-	-	-	-	-	-	-	-	-	-	-	-	-	-	-
804478	804478_p1	5351	177371	IncFIB(AP001918)/IncFII(K)/ColRNAI	-1	iuc 3	88	-	0	-	0	-		-	-	-	-	-	-	-	-	-	-	-	-	-	-	-	-
804478	804478_p5	5351	6871	ColRNAI/Col440II	-1	-	0	-	0	-	0	-		-	-	-	-	-	-	-	-	-	-	-	-	-	-	-	-
804478	804478_p4	5351	5010	no rep type detected	-1	-	0	-	0	-	0	-		-	-	-	-	-	-	-	-	-	-	-	-	-	-	-	-
817632	817632_p2	420	8618	no rep type detected	-1	-	0	-	0	-	0	-		-	-	-	-	-	-	-	-	-	-	-	-	-	-	-	-
817640	817640_p2	420	82067	IncR	-1										CTX-M-15	aac(3)-IIa.v1^;aac(6')-Ib-cr.v1^;strA.v1^;strB.v1		qnrB1.v2^			CatB4.v1		sul2	tet(A).v1	dfrA14.v2*	OXA-1;TEM-1D.v1^
875282	875282_p3	147	61861	IncI2	-1	-	0	-	0	-	0	-		-	-	-	mcr-1.1	-	-	-	-	-	-	-	-	-	-	-	-
875282	875282_p2	147	88068	IncFIB(AP001918)/IncFIA	-1	iuc 5	62-2LV	-	0	-	0	-		-	-	aadA2;aadA2;aadA5;aadA^	-	-	-	lnuF.v1*	cmlA1*	-	sul1;sul3	-	dfrA17	TEM-1D.v1^	-	-	-
908247	908247_p5	395	8351	IncQ1	-1	-	0	-	0	-	0	-		-	-	aph(3')-VIa*	-	-	-	-	-	-	-	-	-	-	-	-	strB.v1?-0%
908247	908247_p6	395	5010	no rep type detected	-1	-	0	-	0	-	0	-		-	-	-	-	-	-	-	-	-	-	-	-	-	-	-	-
908271	908271_p7	23-KL57	1934	no rep type detected	-1	-	0	-	0	-	0	-		-	-	-	-	-	-	-	-	-	-	-	-	-	-	-	-
908553	908553_p2	395	177365	IncFIB(AP001918)/IncFII(K)/ColRNAI	-1	iuc 3	88	-	0	-	0	-		-	-	-	-	-	-	-	-	-	-	-	-	-	-	-	-
908553	908553_p4	395	6870	ColRNAI/Col440II	-1	-	0	-	0	-	0	-		-	-	-	-	-	-	-	-	-	-	-	-	-	-	-	-
908553	908553_p5	395	5010	no rep type detected	-1	-	0	-	0	-	0	-		-	-	-	-	-	-	-	-	-	-	-	-	-	-	-	-
976365	976365_p2	111	190708	IncFII(K)/IncFIB(K)	-1	iuc 3	32-1LV	-	0	-	0	-		-	-	-	-	-	-	-	-	-	-	-	-	-	-	-	-
976365	976365_p1	111	247524	RepA	-1	-	0	-	0	-	0	-		-	CTX-M-55	aac(3)-IId^;aadA2;strA.v1^;strB.v1	-	-	qnrB2.v1^	lnuF.v1	floR.v1	-	sul1;sul1;sul2	tet(A).v2;tet(D)	dfrA14.v2*	TEM-1D.v1^	-	-	-
976365	976365_p3	111	6871	ColRNAI/Col440II	-1	-	0	-	0	-	0	-		-	-	-	-	-	-	-	-	-	-	-	-	-	-	-	-
1004755	1004755_p4	15	54590	no rep type detected	0	-	0	-	0	-	0	-		-	-	-	-	-	-	-	-	-	-	-	-	-	-	-	-
515432	515432_p5	1399	54062	no rep type detected	0	-	0	-	0	-	0	-		-	-	-	-	-	-	-	-	-	-	-	-	-	-	-	-
517485	517485_p5	1399	54062	no rep type detected	0	-	0	-	0	-	0	-		-	-	-	-	-	-	-	-	-	-	-	-	-	-	-	-
15017	15017_p2	37	111854	IncFIB(pKPHS1)	1	-	0	-	0	-	0	-		-	-	-	-	-	-	-	-	-	-	-	-	-	-	-	-
21841	21841_p2	893	152684	IncFIB(pKPHS1)	1	-	0	-	0	-	0	-		-	-	-	-	-	-	-	-	-	-	-	-	-	-	-	-
474269	474269_p2	23-KL1	110788	IncFIB(pKPHS1)	1	-	0	-	0	-	0	-		-	-	-	-	-	-	-	-	-	-	-	-	-	-	-	-
480738	480738_p2	45	112745	IncFIB(pKPHS1)	1	-	0	-	0	-	0	-		-	-	-	-	-	-	-	-	-	-	-	-	-	-	-	-
804398	804398_p3	48	85644	IncFIB(pKPHS1)	1	-	0	-	0	-	0	-		-	-	-	-	-	-	-	-	-	-	-	-	-	-	-	-
974367	974367_p3	23-KL1	109370	IncFIB(pKPHS1)	1	-	0	-	0	-	0	-		-	-	-	-	-	-	-	-	-	-	-	-	-	-	-	-
1004755	1004755_p1	15	396637	IncHI1B/IncFIB(Mar)	2	iuc 1	1-1LV	-	0	-	0	rmpA2_6*-48%		-	-	-	-	-	-	-	-	-	-	-	-	-	-	-	-
1005401	1005401_p1	395	361752	IncHI1B/IncFIB(Mar)	2	iuc 1	63	-	0	rmp 1; KpVP-1	147	rmpA2_6-60%		-	-	aac(6')-Ib-cr.v2	-	-	qnrS1	mphA?	CatB4.v1	-	sul1;sul1	tet(A).v1	dfrA1.v1;dfrA5	OXA-1;TEM-1D.v1^	-	-	-
1005419	1005419_p1	395	216467	IncHI1B/IncFIB(Mar)	2	-	0	-	0	-	0	-		NDM-5	-	-	-	-	-	-	-	-	sul1	-	-	-	-	-	-
1005637	1005637_p1	395	301068	IncHI1B	2	iuc 1	1-1LV	-	0	-	0	rmpA2_6*-48%		-	CTX-M-15	aac(6')-Ib-cr.v2	-	-	qnrS1	-	CatB4.v1;catA1^	-	sul1	tet(A).v1	dfrA1.v1	OXA-1;TEM-1D.v1^	-	-	-
102024	102024_p1	218	365539	IncQ1/IncFIB(Mar)/IncHI1B	2	iuc 1	78	iro 1	1-1LV	rmp 1; KpVP-1 (truncated)	126-1LV	rmpA2_2*-47%		-	CTX-M-15	aac(3)-IId^;aac(6')-Ib-cr.v2^;aadA2^;aph3-Ia.v1;rmtB;strA.v1^;strB.v1	-	-	-	-	catII.2*	arr-3	sul1;sul2*	tet(A).v1;tet(G).v1	dfrA12	TEM-1D.v1^	-	-	floR.v2*?;sul1?-63%
102622	102622_p1	395	345986	IncHI1B/IncFIB(Mar)	2	iuc 1	63	-	0	rmp 1; KpVP-1	147	rmpA2_5-54%		-	-	-	-	-	qnrS1	mphA?	-	-	sul1	-	dfrA5	TEM-1D.v1^	-	-	-
12964	12964_p1	490	308780	IncHI1B/IncFIB(Mar)	2	iuc 1	1	-	0	-	0	rmpA2_8*-60%		-	-	-	-	-	-	-	-	-	-	tet(B).v2*;tetR	-	-	-	-	-
13810	13810_p1	490	308779	IncHI1B/IncFIB(Mar)	2	iuc 1	1	-	0	-	0	rmpA2_8*-60%		-	-	-	-	-	-	-	-	-	-	tet(B).v2*;tetR	-	-	-	-	-
489775	489775_p1	392	305451	IncHI1B/IncFIB(Mar)	2	iuc 1	1-1LV	-	0	-	0	rmpA2_6*-62%		-	-	aadA*;aadA*;ant(2'')-Ia;ant(2'')-Ia	-	-	-	-	catA1^;catA1^	-	sul1;sul1	-	-	-	-	-	-
516343	516343_p1	307	328837	IncHI1B/IncFIB(Mar)	2	iuc 1	1	-	0	-	0	rmpA2_8*-60%		-	-	aadA^	-	-	-	-	-	-	sul1	-	-	-	-	-	catA1*?-0%;dfrA1.v1?-55%
740859	740859_p1	23-KL57	222543	IncFIB(Mar)	2	-	0	-	0	-	0	-		-	-	-	-	-	-	-	-	-	-	-	-	-	-	-	-
803958	803958_p1	395	290494	IncHI1B/IncFIB(Mar)	2	iuc 1	1-1LV	-	0	-	0	rmpA2_6*-48%		-	-	-	-	-	-	-	catA1^	-	-	-	-	-	-	aadA*?-63%;ant(2'')-Ia*-9%	sul1*?-3%
804398	804398_p1	48	303414	IncHI1B/IncFIB(Mar)	2	iuc 1	1	-	0	-	0	rmpA2_6*-48%		-	-	aadA*;ant(2'')-Ia	-	-	-	-	catA1^	-	sul1	-	-	-	-	-	-
821202	821202_p1	395	291819	IncHI1B/IncFIB(Mar)	2	iuc 1	63	-	0	rmp 1; KpVP-1	147	rmpA2_6*-47%		-	-	-	-	-	-	-	-	-	-	-	-	-	-	-	-
875282	875282_p1	147	373087	IncHI1B/IncFIB(Mar)	2	-	0	-	0	-	0	-		NDM-1	TEM-26^	aac(3)-IIa.v1*;aac(6')-Ib-cr.v2	-	-	qnrE2	-	catA1^;catB3.v2	arr-3	sul1	-	-	OXA-1	-	-	-
908247	908247_p1	395	347740	IncHI1B/IncFIB(Mar)	2	iuc 1	63	-	0	rmp 1; KpVP-1	147	rmpA2_5-54%		NDM-1	-	aph(3')-VIa*;armA	-	-	qnrS1	mphA?;mphE.v2;msrE	-	-	sul1;sul2	-	dfrA5	-	-	-	-
908343	908343_p1	23-KL57	216466	IncHI1B/IncFIB(Mar)	2	-	0	-	0	-	0	-		NDM-5	-	-	-	-	-	-	-	-	sul1	-	-	-	-	-	-
908553	908553_p1	395	216467	IncHI1B/IncFIB(Mar)	2	-	0	-	0	-	0	-		NDM-5	-	-	-	-	-	-	-	-	sul1	-	-	-	-	-	-
977691	977691_p1	17	207932	IncHI1B/IncFIB(Mar)	2	-	0	-	0	-	0	-		-	CTX-M-63	aph(3')-IIa;strA.v1;strB.v1	-	-	-	-	-	-	-	-	-	-	-	-	sph.v1?-48%
23620	23620_p2	23-KL1	45435	no rep type detected	3	-	0	-	0	-	0	-		-	-	-	-	-	-	-	-	-	-	-	-	-	-	-	-
515432	515432_p4	1399	44481	IncX3	3	-	0	-	0	-	0	-		-	SHV-12^	-	-	-	qnrS1	-	-	-	-	-	-	-	238S;240K;35Q	-	-
517485	517485_p4	1399	44481	IncX3	3	-	0	-	0	-	0	-		-	-	-	-	-	qnrS1	-	-	-	-	-	-	-	35Q	-	-
862392	862392_p2	25	45048	IncX3	3	-	0	-	0	-	0	-		NDM-5	-	-	-	-	-	-	-	-	-	-	-	-	-	-	-
16006	16006_p1	23-KL1	224670	IncHI1B/IncFIB(K)	4	iuc 1	1	iro 1	2	rmp 1; KpVP-1	34	rmpA2_5-54%		-	-	-	-	-	-	-	-	-	-	-	-	-	-	-	-
21841	21841_p1	893	197335	IncFIB(K)	4	iuc 1	1	iro 1	1	rmp 1; KpVP-1	26	rmpA2_8*		-	-	-	-	-	-	-	-	-	-	-	-	-	-	-	-
23620	23620_p1	23-KL1	247986	IncHI1B/IncFIB(K)	4	iuc 1	1	iro 1	2	rmp 1; KpVP-1	40	rmpA2_5-54%		-	-	-	-	-	-	-	-	-	-	-	-	-	-	-	-
25188	25188_p1	23-KL1	229629	IncHI1B/IncFIB(K)	4	iuc 1	1	iro 1	2	rmp 1; KpVP-1 (truncated)	31	rmpA2_6-60%		-	-	-	-	-	-	-	-	-	-	-	-	-	-	-	-
474269	474269_p1	23-KL1	333788	IncHI1B/IncFIB(K)	4	iuc 1	1	iro 1	2	rmp 1; KpVP-1	26-1LV	rmpA2_6*-60%		-	CTX-M-15	aac(3)-IIa.v1^;aac(6')-Ib-cr.v2;strA.v1^;strB.v1	-	-	-	-	CatB4.v1	-	sul2	-	dfrA14.v2*	OXA-1*;TEM-1D.v1^	-	-	-
489766	489766_p1	23-KL1	205263	IncHI1B/IncFIB(K)	4	iuc 1	1	iro 1	2	rmp 1; KpVP-1	26	rmpA2_6-60%		-	-	-	-	-	-	-	-	-	-	-	-	-	-	-	-
505107	505107_p1	592	218485	IncHI1B/IncFIB(K)	4	iuc 1	5	iro 1	1	rmp 1; KpVP-1	26	rmpA2_5-54%		-	-	-	-	-	-	-	-	-	-	-	-	-	-	-	-
512745	512745_p1	592	218487	IncHI1B/IncFIB(K)	4	iuc 1	5	iro 1	1	rmp 1; KpVP-1	26	rmpA2_5-54%		-	-	-	-	-	-	-	-	-	-	-	-	-	-	-	-
550037	550037_p1	412	203954	IncFIB(K)	4	iuc 1	1	iro 1	1	rmp 1; KpVP-1 (truncated)	26-1LV	rmpA2_8-60%		-	-	-	-	-	-	-	-	-	-	-	-	-	-	-	-
582610	582610_p1	268	206635	IncFIB(K)	4	iuc 1	78	iro 1	1	rmp 1; KpVP-1	26-1LV	rmpA2_8*		-	-	-	-	-	-	-	-	-	-	-	-	-	-	-	-
740859	740859_p6	23-KL57	198671	IncFIB(K)	4	iuc 1	1	-	0	rmp 1; KpVP-1 (truncated)	26-1LV	rmpA2_8*-60%		-	-	-	-	-	-	-	-	-	-	-	-	-	-	-	-
7835	7835_p1	23-KL1	228536	IncHI1B/IncFIB(K)	4	iuc 1	1	iro 1	2	rmp 1; KpVP-1	26	rmpA2_6-60%		-	-	-	-	-	-	-	-	-	-	-	-	-	-	-	-
817608	817608_p1	65	208524	IncHI1B/IncFIB(K)	4	iuc 1	1	-	0	-	0	rmpA2_6-60%		-	-	-	-	-	-	-	-	-	-	-	-	-	-	-	-
817632	817632_p1	420	219995	IncHI1B/IncFIB(K)	4	iuc 1	5	iro 1	1	rmp 1; KpVP-1	45	rmpA2_6-60%		-	-	-	-	-	-	-	-	-	-	-	-	-	-	-	-
817640	817640_p1	420	220567	IncHI1B/IncFIB(K)	4	iuc 1	5	iro 1	1	rmp 1; KpVP-1	45	rmpA2_6*-55%	peg-344
817762	817762_p1	65	215347	IncHI1B/IncFIB(K)	4	iuc 1	1	iro 1	1-1LV	rmp 1; KpVP-1 (truncated)	38	rmpA2_6*-47%		-	-	-	-	-	-	-	-	-	-	-	-	-	-	-	-
893342	893342_p1	86	226954	IncHI1B/IncFIB(K)	4	iuc 1	1	iro 1	1	rmp 1; KpVP-1	26	rmpA2_2*-47%		-	-	-	-	-	-	-	-	-	-	-	-	-	-	-	-
908271	908271_p1	23-KL57	196122	IncFIB(K)	4	iuc 1	1	-	0	rmp unknown	0	rmpA2_8*-60%		-	-	-	-	-	-	-	-	-	-	-	-	-	-	-	-
908343	908343_p2	23-KL57	196121	IncFIB(K)	4	iuc 1	1	-	0	rmp unknown	0	rmpA2_8*-60%		-	-	-	-	-	-	-	-	-	-	-	-	-	-	-	-
974367	974367_p1	23-KL1	211213	IncHI1B/IncFIB(K)	4	iuc 1	1	iro 1	2	rmp 1; KpVP-1 (truncated)	26-1LV	rmpA2_3-47%		-	-	-	-	-	-	-	-	-	-	-	-	-	-	-	-
974649	974649_p1	592	220030	IncHI1B/IncFIB(K)	4	iuc 1	5	iro 1	1-1LV	rmp 1; KpVP-1	26	rmpA2_6*-60%		-	-	-	-	-	-	-	-	-	-	-	-	-	-	-	-
974699	974699_p1	86	226487	IncHI1B/IncFIB(K)	4	iuc 1	1	iro 1	1	rmp 1; KpVP-1	26	rmpA2_8*		-	-	-	-	-	-	-	-	-	-	-	-	-	-	-	-
976583	976583_p1	65	222317	IncHI1B/IncFIB(K)	4	iuc 1	1	iro 1	10	rmp 1; KpVP-1 (truncated)	38	rmpA2_6-60%	peg-344
480738	480738_p3	45	77269	no rep type detected	5	-	0	-	0	-	0	-		-	CTX-M-55	-	-	-	qnrS1	-	-	-	-	tet(A).v1^	-	TEM-1D.v1^	-	-	-
740859	740859_p3	23-KL57	83550	no rep type detected	5	-	0	-	0	-	0	-		-	-	-	-	-	qnrS1	-	catII.2*	-	sul2	tet(A).v1	-	LAP-2	-	-	-
977691	977691_p4	17	72129	no rep type detected	5	-	0	-	0	-	0	-		-	-	-	-	-	qnrS1	-	-	-	-	tet(A).v1^	-	TEM-1D.v1^	-	-	-
515432	515432_p1	1399	239748	IncFIB(K)	7	iuc 1	63	-	0	-	0	rmpA2_5-54%		-	-	-	-	-	-	-	-	-	-	-	-	-	-	-	-
517485	517485_p1	1399	239749	IncFIB(K)	7	iuc 1	63	-	0	-	0	rmpA2_6*-47%		-	-	-	-	-	-	-	-	-	-	-	-	-	-	-	-
515432	515432_p3	1399	67165	IncA/C2	9	-	0	-	0	-	0	-		-	-	ant(2'')-Ia;strA.v1^;strB.v1	-	-	-	-	cmlA5	-	sul1;sul2^	-	-	-	-	-	-
517485	517485_p3	1399	67166	IncA/C2	9	-	0	-	0	-	0	-		-	-	ant(2'')-Ia;strA.v1^;strB.v1	-	-	-	-	cmlA5	-	sul1;sul2^	-	-	-	-	-	-
804398	804398_p2	48	161771	IncA/C2	9	-	0	-	0	-	0	-		NDM-5;NDM-5	-	aac(6')-Ib-cr.v2;aadA2^;aadA2^	-	-	-	-	-	-	sul1;sul1	-	dfrA12^;dfrA12^	-	-	-	-
908271	908271_p2	23-KL57	167745	IncA/C2	9	-	0	-	0	-	0	-		-	SHV-12	aac(6')-Ib7*;aadA2^;armA	-	-	-	mphE.v2;msrE	-	-	sul1	-	dfrA12	-	238S;240K;35Q	-	-
908343	908343_p3	23-KL57	167746	IncA/C2	9	-	0	-	0	-	0	-		-	SHV-12	aac(6')-Ib7*;aadA2^;armA	-	-	-	mphE.v2;msrE	-	-	sul1	-	dfrA12	-	238S;240K;35Q	-	-
1004755	1004755_p3	15	61555	IncL/M(pOXA-48)	10	-	0	-	0	-	0	-		OXA-48	-	-	-	-	-	-	-	-	-	-	-	-	-	-	-
1005401	1005401_p2	395	78146	IncL/M	10	-	0	-	0	-	0	-		OXA-48	-	armA	-	-	-	mphE.v2;msrE	-	-	-	-	-	TEM-1D.v1^	-	-	-
1005637	1005637_p2	395	63577	IncL/M(pOXA-48)	10	-	0	-	0	-	0	-		OXA-244	-	-	-	-	-	-	-	-	-	-	-	-	-	-	-
102622	102622_p2	395	78146	IncL/M	10	-	0	-	0	-	0	-		OXA-48	-	armA	-	-	-	mphE.v2;msrE	-	-	-	-	-	TEM-1D.v1^	-	-	-
489775	489775_p3	392	65499	IncL/M(pOXA-48)	10	-	0	-	0	-	0	-		OXA-48	-	-	-	-	-	-	-	-	-	-	-	-	-	-	-
803958	803958_p3	395	74393	IncL/M	10	-	0	-	0	-	0	-		OXA-48	-	aadA5;armA	-	-	-	mphE.v2;msrE*	-	-	sul1	-	dfrA17	TEM-1D.v1^	-	-	-
908247	908247_p2	395	78146	IncL/M	10	-	0	-	0	-	0	-		OXA-48	-	armA	-	-	-	mphE.v2;msrE	-	-	-	-	-	TEM-1D.v1^	-	-	-
908271	908271_p4	23-KL57	63588	IncL/M(pOXA-48)	10	-	0	-	0	-	0	-		OXA-48	-	-	-	-	-	-	-	-	-	-	-	-	-	-	-
908343	908343_p5	23-KL57	63588	IncL/M(pOXA-48)	10	-	0	-	0	-	0	-		OXA-48	-	-	-	-	-	-	-	-	-	-	-	-	-	-	-
977691	977691_p6	17	3540	no rep type detected	11	-	0	-	0	-	0	-		-	-	-	-	-	-	-	-	-	-	-	-	-	-	-	-
480738	480738_p4	45	10046	ColRNAI	12	-	0	-	0	-	0	-		-	-	-	-	-	-	-	-	-	-	-	-	-	-	-	-
977691	977691_p5	17	10077	ColRNAI	12	-	0	-	0	-	0	-		-	-	-	-	-	-	-	-	-	-	-	-	-	-	-	-
908247	908247_p7	395	3511	Col440I/Col440II	17	-	0	-	0	-	0	-		-	-	-	-	-	-	-	-	-	-	-	-	-	-	-	-
893342	893342_p2	86	4657	Col440I	21	-	0	-	0	-	0	-		-	-	-	-	-	-	-	-	-	-	-	-	-	-	-	-
511092	511092_p1	14	234307	IncFII(K)/IncFIB(K)	23	-	0	-	0	-	0	-		-	-	strA.v1^;strB.v1	-	-	qnrB1.v2^	-	-	-	sul2	tet(A).v1	dfrA14.v2*	-	-	-	-
862392	862392_p1	25	196639	IncFII/IncFIB(K)	23	iuc 3	64	-	0	-	0	-		-	-	-	-	-	-	-	-	-	-	-	-	-	-	-	-
15017	15017_p1	37	245291	IncFII(K)/IncFIB(K)	25	iuc 3	23	-	0	-	0	-		-	-	aadA2*?;strA.v1*	-	-	qnrS1	-	-	-	sul2	tet(A).v1	dfrA12	-	-	-	aph(6)-Id.v1*?-42%
387608	387608_p1	29	248266	IncQ1/IncFII(K)/IncFIB(K)	25	iuc 3	23	-	0	-	0	-		-	-	aac(3)-IId^;aadA2^;aph3-Ia.v1;strA.v1^;strB.v1	-	-	-	mphA	-	-	sul1;sul2*	tet(A).v1	dfrA12	-	-	-	-
365590	365590_p3	2071	8514	Col440I	26	-	0	-	0	-	0	-		-	-	-	-	-	-	-	-	-	-	-	-	TEM-1D.v1^	-	-	-
368311	368311_p4	231	7335	Col440I	26	-	0	-	0	-	0	-		-	-	-	-	-	-	-	-	-	-	-	-	-	-	-	TEM-117?-0%
1004755	1004755_p5	15	9294	ColRNAI	28	-	0	-	0	-	0	-		-	-	-	-	-	-	-	-	-	-	-	-	-	-	-	-
1005401	1005401_p3	395	9294	ColRNAI	28	-	0	-	0	-	0	-		-	-	-	-	-	-	-	-	-	-	-	-	-	-	-	-
1005637	1005637_p3	395	9294	ColRNAI	28	-	0	-	0	-	0	-		-	-	-	-	-	-	-	-	-	-	-	-	-	-	-	-
102622	102622_p3	395	9294	ColRNAI	28	-	0	-	0	-	0	-		-	-	-	-	-	-	-	-	-	-	-	-	-	-	-	-
803958	803958_p4	395	9294	ColRNAI	28	-	0	-	0	-	0	-		-	-	-	-	-	-	-	-	-	-	-	-	-	-	-	-
908247	908247_p4	395	9294	ColRNAI	28	-	0	-	0	-	0	-		-	-	-	-	-	-	-	-	-	-	-	-	-	-	-	-
908271	908271_p5	23-KL57	9294	ColRNAI	28	-	0	-	0	-	0	-		-	-	-	-	-	-	-	-	-	-	-	-	-	-	-	-
908343	908343_p6	23-KL57	9294	ColRNAI	28	-	0	-	0	-	0	-		-	-	-	-	-	-	-	-	-	-	-	-	-	-	-	-
512745	512745_p3	592	4336	Col440I	29	-	0	-	0	-	0	-		-	-	-	-	-	-	-	-	-	-	-	-	-	-	-	-
974649	974649_p2	592	4336	Col440I	29	-	0	-	0	-	0	-		-	-	-	-	-	-	-	-	-	-	-	-	-	-	-	-
489775	489775_p4	392	4167	Col440I	30	-	0	-	0	-	0	-		-	-	-	-	-	-	-	-	-	-	-	-	-	-	-	-
908271	908271_p6	23-KL57	4167	Col440I	30	-	0	-	0	-	0	-		-	-	-	-	-	-	-	-	-	-	-	-	-	-	-	-
908343	908343_p7	23-KL57	4167	Col440I	30	-	0	-	0	-	0	-		-	-	-	-	-	-	-	-	-	-	-	-	-	-	-	-
489775	489775_p2	392	149780	IncFIB(K)/IncFII(K)	31	-	0	-	0	-	0	-		-	-	aac(6')-Ib-cr.v2	-	-	-	-	CatB4.v1	-	-	-	-	OXA-1	-	-	-
516343	516343_p2	307	223332	IncFII(K)/IncFIB(K)	32	-	0	-	0	-	0	-		-	-	aac(3)-IIa.v1^;aac(6')-Ib-cr.v2	-	-	qnrB1.v2^	-	CatB4.v1	-	-	tet(A).v1	dfrA14.v2*	OXA-1	-	-	-
511092	511092_p2	14	99943	IncFII	33	iuc 5	62-2LV	-	0	-	0	-		-	CTX-M-15	aadA5	-	fosA3	-	-	-	-	sul1	-	dfrA17	-	-	TEM-141*?-0%	-
740859	740859_p5	23-KL57	60537	IncFII	33	-	0	-	0	-	0	-		-	CTX-M-55	aac(3)-IIa.v1*;aac(6')-Ib-cr.v2	-	-	-	-	CatB4.v1	-	-	-	-	OXA-1	-	-	-
976461	976461_p1	37	136841	IncFIB(AP001918)/IncFIC(FII)	33	iuc 5	59	-	0	-	0	-		-	CTX-M-55	aac(3)-IIa.v1^;aadA^;aph3-Ia.v1^	-	-	-	-	catII.2*;floR.v1*	-	sul3^	tet(A).v1*	dfrA14.v2*	-	-	-	-
977691	977691_p3	17	103277	IncI	35	-	0	-	0	-	0	-		-	-	aadA2^;aadA^	-	-	-	-	cmlA1*	-	sul3	-	dfrA12	-	-	-	-
1004755	1004755_p2	15	92132	IncR/IncFIA(HI1)	37	-	0	-	0	-	0	-		-	CTX-M-15;CTX-M-15	aac(6')-Ib'.v1;aac(6')-Ib-cr.v2;aadA*;aadA16*;strA.v1*;strB.v1*	-	-	qnrB6^	-	catII.2*	arr-3	sul1;sul1;sul2	-	dfrA27	TEM-1D.v1^;TEM-1D.v1^	-	OXA-9.v1*-42%	-
1005419	1005419_p3	395	61146	IncR	38	-	0	-	0	-	0	-		-	CTX-M-15	aac(6')-Ib-cr.v2	-	-	qnrS1	-	CatB4.v1;catA1^	-	sul1	tet(A).v1	dfrA1.v1	OXA-1;TEM-1D.v1^	-	-	-
102622	102622_p5	395	34713	IncR	38										CTX-M-15	aac(6')-Ib-cr.v2					CatB4.v1;catA1^		sul1	tet(A).v1	dfrA1.v1	OXA-1
387608	387608_p2	29	49061	IncR	38	-	0	-	0	-	0	-		-	-	-	-	-	qnrS1	-	floR.v1	-	-	tet(A).v2	-	TEM-1D.v1^	-	strB.v1?-0%	-
804478	804478_p3	5351	35903	IncR	38	-	0	-	0	-	0	-		-	CTX-M-15	aac(6')-Ib-cr.v2	-	-	-	-	CatB4.v1	-	sul1	tet(A).v1	dfrA1.v1	OXA-1	-	-	-
821202	821202_p2	395	61405	IncR,	38	-	0	-	0	-	0	-		-	CTX-M-15	aac(6')-Ib-cr.v2	-	-	qnrS1	-	CatB4.v1;catA1^	-	sul1	tet(A).v1	dfrA1.v1	OXA-1;TEM-1D.v1^	-	-	-
908247	908247_p3	395	62707	IncR	38	-	0	-	0	-	0	-		-	CTX-M-15	aac(6')-Ib-cr.v2	-	-	qnrS1	-	CatB4.v1;catA1^	-	sul1	tet(A).v1	dfrA1.v1	OXA-1;TEM-1D.v1^	-	-	-
908553	908553_p3	395	70590	IncR	38	-	0	-	0	-	0	-		NDM-5	CTX-M-15	rmtB	-	-	qnrS1	-	catA1^;catA1^	-	sul1	tet(A).v1	dfrA1.v1	TEM-1D.v1^	-	-	TEM-105?-0%
12964	12964_p2	490	122443	IncFII(K)	39	-	0	-	0	-	0	-		-	CTX-M-15	aac(3)-IIa.v1^;aac(6')-Ib-cr.v2;strA.v1^;strB.v1	-	-	qnrB1.v2^	-	CatB4.v1	-	sul2	-	dfrA14.v2*	OXA-1;TEM-1D.v1^	-	-	-
13810	13810_p2	490	122442	IncFII(K)	39	-	0	-	0	-	0	-		-	CTX-M-15	aac(3)-IIa.v1^;aac(6')-Ib-cr.v2;strA.v1^;strB.v1	-	-	qnrB1.v2^	-	CatB4.v1	-	sul2	-	dfrA14.v2*	OXA-1;TEM-1D.v1^	-	-	-
365590	365590_p1	2071	173234	IncFII(K)/IncFIB(pQil)	39	-	0	-	0	-	0	-		NDM-1	-	aac(6')-Ib;rmtF	-	-	qnrB1.v1	-	-	arr-2	-	-	-	-	-	-	-
582610	582610_p2	268	117218	IncFII(K)	39	-	0	-	0	-	0	-		-	CTX-M-15	aac(6')-Ib-cr.v2;aadA16*	-	-	-	mphA	-	arr-3	sul1	tet(A).v1	dfrA27	TEM-1D.v1^	-	-	-
740859	740859_p4	23-KL57	81945	IncFIA(HI1)/IncFII(K)	39	-	0	-	0	-	0	-		-	-	-	-	-	-	-	-	-	-	-	-	-	-	-	-
804478	804478_p2	5351	113308	IncFII(K)/IncFIB(pQil)	39	-	0	-	0	-	0	-		-	-	aac(6')-Ib-cr.v2*;aadA*	-	-	-	-	-	-	-	-	-	TEM-1D.v1^	-	OXA-9.v1*-42%	-
908271	908271_p3	23-KL57	124510	IncFII(K)	39	-	0	-	0	-	0	-		-	CTX-M-15	aac(3)-IIa.v1^;aac(6')-Ib-cr.v2;strA.v1^;strB.v1	-	-	qnrB1.v2^	-	CatB4.v1	-	sul2	-	dfrA14.v2*	OXA-1;TEM-1D.v1^	-	-	-
908343	908343_p4	23-KL57	124505	IncFII(K)	39	-	0	-	0	-	0	-		-	CTX-M-15	aac(3)-IIa.v1^;aac(6')-Ib-cr.v2;strA.v1^;strB.v1	-	-	qnrB1.v2^	-	CatB4.v1	-	sul2	-	dfrA14.v2*	OXA-1;TEM-1D.v1^	-	-	-
974367	974367_p2	23-KL1	118707	IncFII/IncR	39	-	0	-	0	-	0	-		-	-	-	-	-	-	-	-	-	-	-	-	-	-	-	-
977691	977691_p2	17	180410	IncFII/IncFIB(K)	39	iuc 3	25-1LV	-	0	-	0	-		-	-	-	-	-	-	-	catII.2*	-	sul2	-	-	-	-	-	-
517485	517485_p2	1399	97507	IncFIB(pQil)/IncFII(K)	40	-	0	-	0	-	0	-		-	SHV-12^	aac(6')-Ib'.v1	-	-	-	-	-	-	-	-	-	-	238S;240K;35Q	-	-
803958	803958_p2	395	209395	IncFII(K)/IncFIB(K)	42	-	0	-	0	-	0	-		-	CTX-M-15	-	-	-	qnrS1	-	catA1^	-	-	-	-	TEM-1D.v1^	-	-	aac(6')-Ib-cr.v2*?-61%
1004755	1004755_p6	15	6913	no rep type detected	nt	-	0	-	0	-	0	-		-	-	-	-	-	-	-	-	-	-	-	-	-	-	-	-
23620	23620_p4	23-KL1	6814	no rep type detected	nt	-	0	-	0	-	0	-		-	-	-	-	-	-	-	-	-	-	-	-	-	-	-	-
365590	365590_p5	2071	2947	no rep type detected	nt	-	0	-	0	-	0	-		-	-	-	-	-	-	-	-	-	-	-	-	-	-	-	-
368311	368311_p7	231	2101	Col(BS512)	nt	-	0	-	0	-	0	-		-	-	-	-	-	-	-	-	-	-	-	-	-	-	-	-
368311	368311_p6	231	3998	no rep type detected	nt	-	0	-	0	-	0	-		-	-	-	-	-	-	-	-	-	-	-	-	-	-	-	-
nt, non-typeable
*predicted by custom BLAST (>95% identity and >80% query coverage) using peg-344 from strain hvkp1 as reference.
