# Supplementary material for: Preferred evolutionary routes of convergence in Klebsiella pneumoniae favor siderophore acquisition over hypervirulence
Source: Research Square preprint supplement (doi:10.21203/rs.3.rs-8613390/v1), 2026-02-13
Supplement: Supplementary file 5 [file f3fc1614ca43d619e43f0091.xlsx]

## Sheet: cgMLST_distanceMatrix
Isolate A	Isolate B	Lineage A	Lineage B	Country A	Country B	cgMLST_distance
22261	21777	ST11	ST11	Peru	Peru	6
791887	21777	ST11	ST11	Thailand	Peru	254
22269	21777	ST11	ST11	Peru	Peru	17
875678	21777	ST11	ST11	Peru	Peru	250
22260	21777	ST11	ST11	Peru	Peru	27
582081	21777	ST11	ST11	Thailand	Peru	285
582559	21777	ST11	ST11	Thailand	Peru	256
976979	21777	ST11	ST11	Thailand	Peru	259
21779	21777	ST11	ST11	Peru	Peru	7
22271	21777	ST11	ST11	Peru	Peru	262
876500	21777	ST11	ST11	Peru	Peru	207
876518	21777	ST11	ST11	Peru	Peru	207
580940	21777	ST11	ST11	Thailand	Peru	255
974971	21777	ST11	ST11	Thailand	Peru	262
515575	21777	ST11	ST11	Jordan	Peru	259
22270	21777	ST11	ST11	Peru	Peru	263
875598	21777	ST11	ST11	Peru	Peru	256
875320	21777	ST11	ST11	Peru	Peru	260
875136	21777	ST11	ST11	Peru	Peru	251
875492	21777	ST11	ST11	Peru	Peru	260
875128	21777	ST11	ST11	Peru	Peru	21
876988	21777	ST11	ST11	Peru	Peru	263
22245	21777	ST11	ST11	Peru	Peru	256
22246	21777	ST11	ST11	Peru	Peru	257
689006	21777	ST11	ST11	Thailand	Peru	261
689354	21777	ST11	ST11	Thailand	Peru	261
975071	21777	ST11	ST11	Thailand	Peru	262
514929	21777	ST11	ST11	Jordan	Peru	257
518156	21777	ST11	ST11	Jordan	Peru	255
518633	21777	ST11	ST11	Jordan	Peru	262
518183	21777	ST11	ST11	Jordan	Peru	257
662360	21777	ST11	ST11	Uganda	Peru	205
893166	21777	ST11	ST11	Uganda	Peru	257
21780	21777	ST11	ST11	Peru	Peru	8
876278	21777	ST11	ST11	Peru	Peru	211
876294	21777	ST11	ST11	Peru	Peru	212
876816	21777	ST11	ST11	Peru	Peru	260
875812	21777	ST11	ST11	Peru	Peru	261
875580	21777	ST11	ST11	Peru	Peru	260
876324	21777	ST11	ST11	Peru	Peru	260
876332	21777	ST11	ST11	Peru	Peru	208
875506	21777	ST11	ST11	Peru	Peru	256
976285	21777	ST11	ST11	Thailand	Peru	258
518624	21777	ST11	ST11	Jordan	Peru	262
514974	21777	ST11	ST11	Jordan	Peru	257
803756	21777	ST11	ST11	Georgia	Peru	252
876286	21777	ST11	ST11	Peru	Peru	211
875984	21777	ST11	ST11	Peru	Peru	258
876042	21777	ST11	ST11	Peru	Peru	210
876308	21777	ST11	ST11	Peru	Peru	211
876156	21777	ST11	ST11	Peru	Peru	209
876904	21777	ST11	ST11	Peru	Peru	213
877062	21777	ST11	ST11	Peru	Peru	261
367941	21777	ST11	ST11	Kenya	Peru	207
367987	21777	ST11	ST11	Kenya	Peru	253
876446	21777	ST11	ST11	Peru	Peru	216
876778	21777	ST11	ST11	Peru	Peru	252
367950	21777	ST11	ST11	Kenya	Peru	441
367969	21777	ST11	ST11	Kenya	Peru	442
367932	21777	ST11	ST11	Kenya	Peru	207
21777	22261	ST11	ST11	Peru	Peru	6
791887	22261	ST11	ST11	Thailand	Peru	250
22269	22261	ST11	ST11	Peru	Peru	15
875678	22261	ST11	ST11	Peru	Peru	246
22260	22261	ST11	ST11	Peru	Peru	24
582081	22261	ST11	ST11	Thailand	Peru	281
582559	22261	ST11	ST11	Thailand	Peru	252
976979	22261	ST11	ST11	Thailand	Peru	254
21779	22261	ST11	ST11	Peru	Peru	3
22271	22261	ST11	ST11	Peru	Peru	258
876500	22261	ST11	ST11	Peru	Peru	204
876518	22261	ST11	ST11	Peru	Peru	204
580940	22261	ST11	ST11	Thailand	Peru	251
974971	22261	ST11	ST11	Thailand	Peru	257
515575	22261	ST11	ST11	Jordan	Peru	255
22270	22261	ST11	ST11	Peru	Peru	259
875598	22261	ST11	ST11	Peru	Peru	253
875320	22261	ST11	ST11	Peru	Peru	256
875136	22261	ST11	ST11	Peru	Peru	248
875492	22261	ST11	ST11	Peru	Peru	256
875128	22261	ST11	ST11	Peru	Peru	19
876988	22261	ST11	ST11	Peru	Peru	259
22245	22261	ST11	ST11	Peru	Peru	252
22246	22261	ST11	ST11	Peru	Peru	253
689006	22261	ST11	ST11	Thailand	Peru	256
689354	22261	ST11	ST11	Thailand	Peru	256
975071	22261	ST11	ST11	Thailand	Peru	257
514929	22261	ST11	ST11	Jordan	Peru	253
518156	22261	ST11	ST11	Jordan	Peru	251
518633	22261	ST11	ST11	Jordan	Peru	258
518183	22261	ST11	ST11	Jordan	Peru	253
662360	22261	ST11	ST11	Uganda	Peru	201
893166	22261	ST11	ST11	Uganda	Peru	253
21780	22261	ST11	ST11	Peru	Peru	4
876278	22261	ST11	ST11	Peru	Peru	208
876294	22261	ST11	ST11	Peru	Peru	209
876816	22261	ST11	ST11	Peru	Peru	256
875812	22261	ST11	ST11	Peru	Peru	257
875580	22261	ST11	ST11	Peru	Peru	256
876324	22261	ST11	ST11	Peru	Peru	256
876332	22261	ST11	ST11	Peru	Peru	205
875506	22261	ST11	ST11	Peru	Peru	252
976285	22261	ST11	ST11	Thailand	Peru	254
518624	22261	ST11	ST11	Jordan	Peru	258
514974	22261	ST11	ST11	Jordan	Peru	253
803756	22261	ST11	ST11	Georgia	Peru	248
876286	22261	ST11	ST11	Peru	Peru	208
875984	22261	ST11	ST11	Peru	Peru	255
876042	22261	ST11	ST11	Peru	Peru	207
876308	22261	ST11	ST11	Peru	Peru	208
876156	22261	ST11	ST11	Peru	Peru	206
876904	22261	ST11	ST11	Peru	Peru	209
877062	22261	ST11	ST11	Peru	Peru	257
367941	22261	ST11	ST11	Kenya	Peru	203
367987	22261	ST11	ST11	Kenya	Peru	249
876446	22261	ST11	ST11	Peru	Peru	213
876778	22261	ST11	ST11	Peru	Peru	249
367950	22261	ST11	ST11	Kenya	Peru	436
367969	22261	ST11	ST11	Kenya	Peru	437
367932	22261	ST11	ST11	Kenya	Peru	203
21777	791887	ST11	ST11	Peru	Thailand	254
22261	791887	ST11	ST11	Peru	Thailand	250
22269	791887	ST11	ST11	Peru	Thailand	256
875678	791887	ST11	ST11	Peru	Thailand	15
22260	791887	ST11	ST11	Peru	Thailand	265
582081	791887	ST11	ST11	Thailand	Thailand	48
582559	791887	ST11	ST11	Thailand	Thailand	3
976979	791887	ST11	ST11	Thailand	Thailand	25
21779	791887	ST11	ST11	Peru	Thailand	251
22271	791887	ST11	ST11	Peru	Thailand	209
876500	791887	ST11	ST11	Peru	Thailand	227
876518	791887	ST11	ST11	Peru	Thailand	226
580940	791887	ST11	ST11	Thailand	Thailand	1
974971	791887	ST11	ST11	Thailand	Thailand	27
515575	791887	ST11	ST11	Jordan	Thailand	20
22270	791887	ST11	ST11	Peru	Thailand	209
875598	791887	ST11	ST11	Peru	Thailand	19
875320	791887	ST11	ST11	Peru	Thailand	21
875136	791887	ST11	ST11	Peru	Thailand	28
875492	791887	ST11	ST11	Peru	Thailand	21
875128	791887	ST11	ST11	Peru	Thailand	259
876988	791887	ST11	ST11	Peru	Thailand	46
22245	791887	ST11	ST11	Peru	Thailand	18
22246	791887	ST11	ST11	Peru	Thailand	18
689006	791887	ST11	ST11	Thailand	Thailand	25
689354	791887	ST11	ST11	Thailand	Thailand	25
975071	791887	ST11	ST11	Thailand	Thailand	27
514929	791887	ST11	ST11	Jordan	Thailand	18
518156	791887	ST11	ST11	Jordan	Thailand	17
518633	791887	ST11	ST11	Jordan	Thailand	22
518183	791887	ST11	ST11	Jordan	Thailand	17
662360	791887	ST11	ST11	Uganda	Thailand	194
893166	791887	ST11	ST11	Uganda	Thailand	19
21780	791887	ST11	ST11	Peru	Thailand	252
876278	791887	ST11	ST11	Peru	Thailand	229
876294	791887	ST11	ST11	Peru	Thailand	231
876816	791887	ST11	ST11	Peru	Thailand	22
875812	791887	ST11	ST11	Peru	Thailand	23
875580	791887	ST11	ST11	Peru	Thailand	21
876324	791887	ST11	ST11	Peru	Thailand	35
876332	791887	ST11	ST11	Peru	Thailand	226
875506	791887	ST11	ST11	Peru	Thailand	18
976285	791887	ST11	ST11	Thailand	Thailand	22
518624	791887	ST11	ST11	Jordan	Thailand	22
514974	791887	ST11	ST11	Jordan	Thailand	17
803756	791887	ST11	ST11	Georgia	Thailand	206
876286	791887	ST11	ST11	Peru	Thailand	230
875984	791887	ST11	ST11	Peru	Thailand	195
876042	791887	ST11	ST11	Peru	Thailand	229
876308	791887	ST11	ST11	Peru	Thailand	230
876156	791887	ST11	ST11	Peru	Thailand	228
876904	791887	ST11	ST11	Peru	Thailand	192
877062	791887	ST11	ST11	Peru	Thailand	198
367941	791887	ST11	ST11	Kenya	Thailand	188
367987	791887	ST11	ST11	Kenya	Thailand	16
876446	791887	ST11	ST11	Peru	Thailand	198
876778	791887	ST11	ST11	Peru	Thailand	29
367950	791887	ST11	ST11	Kenya	Thailand	392
367969	791887	ST11	ST11	Kenya	Thailand	392
367932	791887	ST11	ST11	Kenya	Thailand	188
21777	22269	ST11	ST11	Peru	Peru	17
22261	22269	ST11	ST11	Peru	Peru	15
791887	22269	ST11	ST11	Thailand	Peru	256
875678	22269	ST11	ST11	Peru	Peru	250
22260	22269	ST11	ST11	Peru	Peru	28
582081	22269	ST11	ST11	Thailand	Peru	286
582559	22269	ST11	ST11	Thailand	Peru	258
976979	22269	ST11	ST11	Thailand	Peru	260
21779	22269	ST11	ST11	Peru	Peru	16
22271	22269	ST11	ST11	Peru	Peru	263
876500	22269	ST11	ST11	Peru	Peru	210
876518	22269	ST11	ST11	Peru	Peru	210
580940	22269	ST11	ST11	Thailand	Peru	257
974971	22269	ST11	ST11	Thailand	Peru	263
515575	22269	ST11	ST11	Jordan	Peru	260
22270	22269	ST11	ST11	Peru	Peru	264
875598	22269	ST11	ST11	Peru	Peru	257
875320	22269	ST11	ST11	Peru	Peru	260
875136	22269	ST11	ST11	Peru	Peru	252
875492	22269	ST11	ST11	Peru	Peru	260
875128	22269	ST11	ST11	Peru	Peru	23
876988	22269	ST11	ST11	Peru	Peru	263
22245	22269	ST11	ST11	Peru	Peru	256
22246	22269	ST11	ST11	Peru	Peru	257
689006	22269	ST11	ST11	Thailand	Peru	262
689354	22269	ST11	ST11	Thailand	Peru	262
975071	22269	ST11	ST11	Thailand	Peru	263
514929	22269	ST11	ST11	Jordan	Peru	258
518156	22269	ST11	ST11	Jordan	Peru	256
518633	22269	ST11	ST11	Jordan	Peru	263
518183	22269	ST11	ST11	Jordan	Peru	258
662360	22269	ST11	ST11	Uganda	Peru	206
893166	22269	ST11	ST11	Uganda	Peru	258
21780	22269	ST11	ST11	Peru	Peru	17
876278	22269	ST11	ST11	Peru	Peru	214
876294	22269	ST11	ST11	Peru	Peru	215
876816	22269	ST11	ST11	Peru	Peru	260
875812	22269	ST11	ST11	Peru	Peru	261
875580	22269	ST11	ST11	Peru	Peru	260
876324	22269	ST11	ST11	Peru	Peru	261
876332	22269	ST11	ST11	Peru	Peru	211
875506	22269	ST11	ST11	Peru	Peru	256
976285	22269	ST11	ST11	Thailand	Peru	260
518624	22269	ST11	ST11	Jordan	Peru	263
514974	22269	ST11	ST11	Jordan	Peru	258
803756	22269	ST11	ST11	Georgia	Peru	255
876286	22269	ST11	ST11	Peru	Peru	214
875984	22269	ST11	ST11	Peru	Peru	260
876042	22269	ST11	ST11	Peru	Peru	213
876308	22269	ST11	ST11	Peru	Peru	214
876156	22269	ST11	ST11	Peru	Peru	212
876904	22269	ST11	ST11	Peru	Peru	214
877062	22269	ST11	ST11	Peru	Peru	262
367941	22269	ST11	ST11	Kenya	Peru	208
367987	22269	ST11	ST11	Kenya	Peru	254
876446	22269	ST11	ST11	Peru	Peru	218
876778	22269	ST11	ST11	Peru	Peru	253
367950	22269	ST11	ST11	Kenya	Peru	442
367969	22269	ST11	ST11	Kenya	Peru	443
367932	22269	ST11	ST11	Kenya	Peru	208
21777	875678	ST11	ST11	Peru	Peru	250
22261	875678	ST11	ST11	Peru	Peru	246
791887	875678	ST11	ST11	Thailand	Peru	15
22269	875678	ST11	ST11	Peru	Peru	250
22260	875678	ST11	ST11	Peru	Peru	260
582081	875678	ST11	ST11	Thailand	Peru	48
582559	875678	ST11	ST11	Thailand	Peru	16
976979	875678	ST11	ST11	Thailand	Peru	23
21779	875678	ST11	ST11	Peru	Peru	246
22271	875678	ST11	ST11	Peru	Peru	206
876500	875678	ST11	ST11	Peru	Peru	222
876518	875678	ST11	ST11	Peru	Peru	221
580940	875678	ST11	ST11	Thailand	Peru	15
974971	875678	ST11	ST11	Thailand	Peru	25
515575	875678	ST11	ST11	Jordan	Peru	19
22270	875678	ST11	ST11	Peru	Peru	206
875598	875678	ST11	ST11	Peru	Peru	7
875320	875678	ST11	ST11	Peru	Peru	8
875136	875678	ST11	ST11	Peru	Peru	28
875492	875678	ST11	ST11	Peru	Peru	9
875128	875678	ST11	ST11	Peru	Peru	254
876988	875678	ST11	ST11	Peru	Peru	34
22245	875678	ST11	ST11	Peru	Peru	6
22246	875678	ST11	ST11	Peru	Peru	6
689006	875678	ST11	ST11	Thailand	Peru	23
689354	875678	ST11	ST11	Thailand	Peru	23
975071	875678	ST11	ST11	Thailand	Peru	25
514929	875678	ST11	ST11	Jordan	Peru	17
518156	875678	ST11	ST11	Jordan	Peru	16
518633	875678	ST11	ST11	Jordan	Peru	21
518183	875678	ST11	ST11	Jordan	Peru	16
662360	875678	ST11	ST11	Uganda	Peru	189
893166	875678	ST11	ST11	Uganda	Peru	17
21780	875678	ST11	ST11	Peru	Peru	247
876278	875678	ST11	ST11	Peru	Peru	224
876294	875678	ST11	ST11	Peru	Peru	226
876816	875678	ST11	ST11	Peru	Peru	10
875812	875678	ST11	ST11	Peru	Peru	11
875580	875678	ST11	ST11	Peru	Peru	9
876324	875678	ST11	ST11	Peru	Peru	36
876332	875678	ST11	ST11	Peru	Peru	221
875506	875678	ST11	ST11	Peru	Peru	6
976285	875678	ST11	ST11	Thailand	Peru	21
518624	875678	ST11	ST11	Jordan	Peru	21
514974	875678	ST11	ST11	Jordan	Peru	16
803756	875678	ST11	ST11	Georgia	Peru	200
876286	875678	ST11	ST11	Peru	Peru	225
875984	875678	ST11	ST11	Peru	Peru	190
876042	875678	ST11	ST11	Peru	Peru	224
876308	875678	ST11	ST11	Peru	Peru	225
876156	875678	ST11	ST11	Peru	Peru	223
876904	875678	ST11	ST11	Peru	Peru	187
877062	875678	ST11	ST11	Peru	Peru	193
367941	875678	ST11	ST11	Kenya	Peru	182
367987	875678	ST11	ST11	Kenya	Peru	16
876446	875678	ST11	ST11	Peru	Peru	193
876778	875678	ST11	ST11	Peru	Peru	29
367950	875678	ST11	ST11	Kenya	Peru	388
367969	875678	ST11	ST11	Kenya	Peru	388
367932	875678	ST11	ST11	Kenya	Peru	182
21777	22260	ST11	ST11	Peru	Peru	27
22261	22260	ST11	ST11	Peru	Peru	24
791887	22260	ST11	ST11	Thailand	Peru	265
22269	22260	ST11	ST11	Peru	Peru	28
875678	22260	ST11	ST11	Peru	Peru	260
582081	22260	ST11	ST11	Thailand	Peru	294
582559	22260	ST11	ST11	Thailand	Peru	267
976979	22260	ST11	ST11	Thailand	Peru	269
21779	22260	ST11	ST11	Peru	Peru	24
22271	22260	ST11	ST11	Peru	Peru	274
876500	22260	ST11	ST11	Peru	Peru	219
876518	22260	ST11	ST11	Peru	Peru	219
580940	22260	ST11	ST11	Thailand	Peru	266
974971	22260	ST11	ST11	Thailand	Peru	270
515575	22260	ST11	ST11	Jordan	Peru	269
22270	22260	ST11	ST11	Peru	Peru	275
875598	22260	ST11	ST11	Peru	Peru	267
875320	22260	ST11	ST11	Peru	Peru	269
875136	22260	ST11	ST11	Peru	Peru	261
875492	22260	ST11	ST11	Peru	Peru	269
875128	22260	ST11	ST11	Peru	Peru	31
876988	22260	ST11	ST11	Peru	Peru	273
22245	22260	ST11	ST11	Peru	Peru	266
22246	22260	ST11	ST11	Peru	Peru	267
689006	22260	ST11	ST11	Thailand	Peru	271
689354	22260	ST11	ST11	Thailand	Peru	271
975071	22260	ST11	ST11	Thailand	Peru	270
514929	22260	ST11	ST11	Jordan	Peru	266
518156	22260	ST11	ST11	Jordan	Peru	265
518633	22260	ST11	ST11	Jordan	Peru	272
518183	22260	ST11	ST11	Jordan	Peru	267
662360	22260	ST11	ST11	Uganda	Peru	214
893166	22260	ST11	ST11	Uganda	Peru	267
21780	22260	ST11	ST11	Peru	Peru	25
876278	22260	ST11	ST11	Peru	Peru	223
876294	22260	ST11	ST11	Peru	Peru	224
876816	22260	ST11	ST11	Peru	Peru	270
875812	22260	ST11	ST11	Peru	Peru	271
875580	22260	ST11	ST11	Peru	Peru	269
876324	22260	ST11	ST11	Peru	Peru	270
876332	22260	ST11	ST11	Peru	Peru	220
875506	22260	ST11	ST11	Peru	Peru	266
976285	22260	ST11	ST11	Thailand	Peru	269
518624	22260	ST11	ST11	Jordan	Peru	272
514974	22260	ST11	ST11	Jordan	Peru	267
803756	22260	ST11	ST11	Georgia	Peru	266
876286	22260	ST11	ST11	Peru	Peru	223
875984	22260	ST11	ST11	Peru	Peru	272
876042	22260	ST11	ST11	Peru	Peru	222
876308	22260	ST11	ST11	Peru	Peru	223
876156	22260	ST11	ST11	Peru	Peru	221
876904	22260	ST11	ST11	Peru	Peru	222
877062	22260	ST11	ST11	Peru	Peru	272
367941	22260	ST11	ST11	Kenya	Peru	216
367987	22260	ST11	ST11	Kenya	Peru	263
876446	22260	ST11	ST11	Peru	Peru	225
876778	22260	ST11	ST11	Peru	Peru	262
367950	22260	ST11	ST11	Kenya	Peru	445
367969	22260	ST11	ST11	Kenya	Peru	446
367932	22260	ST11	ST11	Kenya	Peru	216
21777	582081	ST11	ST11	Peru	Thailand	285
22261	582081	ST11	ST11	Peru	Thailand	281
791887	582081	ST11	ST11	Thailand	Thailand	48
22269	582081	ST11	ST11	Peru	Thailand	286
875678	582081	ST11	ST11	Peru	Thailand	48
22260	582081	ST11	ST11	Peru	Thailand	294
582559	582081	ST11	ST11	Thailand	Thailand	49
976979	582081	ST11	ST11	Thailand	Thailand	53
21779	582081	ST11	ST11	Peru	Thailand	281
22271	582081	ST11	ST11	Peru	Thailand	240
876500	582081	ST11	ST11	Peru	Thailand	258
876518	582081	ST11	ST11	Peru	Thailand	258
580940	582081	ST11	ST11	Thailand	Thailand	46
974971	582081	ST11	ST11	Thailand	Thailand	51
515575	582081	ST11	ST11	Jordan	Thailand	51
22270	582081	ST11	ST11	Peru	Thailand	240
875598	582081	ST11	ST11	Peru	Thailand	51
875320	582081	ST11	ST11	Peru	Thailand	53
875136	582081	ST11	ST11	Peru	Thailand	60
875492	582081	ST11	ST11	Peru	Thailand	53
875128	582081	ST11	ST11	Peru	Thailand	288
876988	582081	ST11	ST11	Peru	Thailand	78
22245	582081	ST11	ST11	Peru	Thailand	50
22246	582081	ST11	ST11	Peru	Thailand	49
689006	582081	ST11	ST11	Thailand	Thailand	53
689354	582081	ST11	ST11	Thailand	Thailand	53
975071	582081	ST11	ST11	Thailand	Thailand	51
514929	582081	ST11	ST11	Jordan	Thailand	50
518156	582081	ST11	ST11	Jordan	Thailand	49
518633	582081	ST11	ST11	Jordan	Thailand	54
518183	582081	ST11	ST11	Jordan	Thailand	49
662360	582081	ST11	ST11	Uganda	Thailand	224
893166	582081	ST11	ST11	Uganda	Thailand	51
21780	582081	ST11	ST11	Peru	Thailand	282
876278	582081	ST11	ST11	Peru	Thailand	260
876294	582081	ST11	ST11	Peru	Thailand	262
876816	582081	ST11	ST11	Peru	Thailand	54
875812	582081	ST11	ST11	Peru	Thailand	55
875580	582081	ST11	ST11	Peru	Thailand	53
876324	582081	ST11	ST11	Peru	Thailand	71
876332	582081	ST11	ST11	Peru	Thailand	258
875506	582081	ST11	ST11	Peru	Thailand	50
976285	582081	ST11	ST11	Thailand	Thailand	47
518624	582081	ST11	ST11	Jordan	Thailand	53
514974	582081	ST11	ST11	Jordan	Thailand	49
803756	582081	ST11	ST11	Georgia	Thailand	238
876286	582081	ST11	ST11	Peru	Thailand	261
875984	582081	ST11	ST11	Peru	Thailand	229
876042	582081	ST11	ST11	Peru	Thailand	261
876308	582081	ST11	ST11	Peru	Thailand	261
876156	582081	ST11	ST11	Peru	Thailand	260
876904	582081	ST11	ST11	Peru	Thailand	225
877062	582081	ST11	ST11	Peru	Thailand	230
367941	582081	ST11	ST11	Kenya	Thailand	219
367987	582081	ST11	ST11	Kenya	Thailand	50
876446	582081	ST11	ST11	Peru	Thailand	231
876778	582081	ST11	ST11	Peru	Thailand	64
367950	582081	ST11	ST11	Kenya	Thailand	417
367969	582081	ST11	ST11	Kenya	Thailand	418
367932	582081	ST11	ST11	Kenya	Thailand	219
21777	582559	ST11	ST11	Peru	Thailand	256
22261	582559	ST11	ST11	Peru	Thailand	252
791887	582559	ST11	ST11	Thailand	Thailand	3
22269	582559	ST11	ST11	Peru	Thailand	258
875678	582559	ST11	ST11	Peru	Thailand	16
22260	582559	ST11	ST11	Peru	Thailand	267
582081	582559	ST11	ST11	Thailand	Thailand	49
976979	582559	ST11	ST11	Thailand	Thailand	25
21779	582559	ST11	ST11	Peru	Thailand	253
22271	582559	ST11	ST11	Peru	Thailand	213
876500	582559	ST11	ST11	Peru	Thailand	230
876518	582559	ST11	ST11	Peru	Thailand	229
580940	582559	ST11	ST11	Thailand	Thailand	1
974971	582559	ST11	ST11	Thailand	Thailand	27
515575	582559	ST11	ST11	Jordan	Thailand	21
22270	582559	ST11	ST11	Peru	Thailand	213
875598	582559	ST11	ST11	Peru	Thailand	20
875320	582559	ST11	ST11	Peru	Thailand	21
875136	582559	ST11	ST11	Peru	Thailand	29
875492	582559	ST11	ST11	Peru	Thailand	22
875128	582559	ST11	ST11	Peru	Thailand	261
876988	582559	ST11	ST11	Peru	Thailand	47
22245	582559	ST11	ST11	Peru	Thailand	19
22246	582559	ST11	ST11	Peru	Thailand	19
689006	582559	ST11	ST11	Thailand	Thailand	26
689354	582559	ST11	ST11	Thailand	Thailand	26
975071	582559	ST11	ST11	Thailand	Thailand	27
514929	582559	ST11	ST11	Jordan	Thailand	19
518156	582559	ST11	ST11	Jordan	Thailand	18
518633	582559	ST11	ST11	Jordan	Thailand	23
518183	582559	ST11	ST11	Jordan	Thailand	18
662360	582559	ST11	ST11	Uganda	Thailand	196
893166	582559	ST11	ST11	Uganda	Thailand	19
21780	582559	ST11	ST11	Peru	Thailand	254
876278	582559	ST11	ST11	Peru	Thailand	232
876294	582559	ST11	ST11	Peru	Thailand	234
876816	582559	ST11	ST11	Peru	Thailand	23
875812	582559	ST11	ST11	Peru	Thailand	24
875580	582559	ST11	ST11	Peru	Thailand	22
876324	582559	ST11	ST11	Peru	Thailand	37
876332	582559	ST11	ST11	Peru	Thailand	228
875506	582559	ST11	ST11	Peru	Thailand	19
976285	582559	ST11	ST11	Thailand	Thailand	22
518624	582559	ST11	ST11	Jordan	Thailand	23
514974	582559	ST11	ST11	Jordan	Thailand	18
803756	582559	ST11	ST11	Georgia	Thailand	208
876286	582559	ST11	ST11	Peru	Thailand	233
875984	582559	ST11	ST11	Peru	Thailand	197
876042	582559	ST11	ST11	Peru	Thailand	232
876308	582559	ST11	ST11	Peru	Thailand	233
876156	582559	ST11	ST11	Peru	Thailand	230
876904	582559	ST11	ST11	Peru	Thailand	194
877062	582559	ST11	ST11	Peru	Thailand	200
367941	582559	ST11	ST11	Kenya	Thailand	190
367987	582559	ST11	ST11	Kenya	Thailand	17
876446	582559	ST11	ST11	Peru	Thailand	200
876778	582559	ST11	ST11	Peru	Thailand	31
367950	582559	ST11	ST11	Kenya	Thailand	393
367969	582559	ST11	ST11	Kenya	Thailand	393
367932	582559	ST11	ST11	Kenya	Thailand	190
21777	976979	ST11	ST11	Peru	Thailand	259
22261	976979	ST11	ST11	Peru	Thailand	254
791887	976979	ST11	ST11	Thailand	Thailand	25
22269	976979	ST11	ST11	Peru	Thailand	260
875678	976979	ST11	ST11	Peru	Thailand	23
22260	976979	ST11	ST11	Peru	Thailand	269
582081	976979	ST11	ST11	Thailand	Thailand	53
582559	976979	ST11	ST11	Thailand	Thailand	25
21779	976979	ST11	ST11	Peru	Thailand	255
22271	976979	ST11	ST11	Peru	Thailand	217
876500	976979	ST11	ST11	Peru	Thailand	233
876518	976979	ST11	ST11	Peru	Thailand	232
580940	976979	ST11	ST11	Thailand	Thailand	24
974971	976979	ST11	ST11	Thailand	Thailand	29
515575	976979	ST11	ST11	Jordan	Thailand	28
22270	976979	ST11	ST11	Peru	Thailand	217
875598	976979	ST11	ST11	Peru	Thailand	26
875320	976979	ST11	ST11	Peru	Thailand	28
875136	976979	ST11	ST11	Peru	Thailand	36
875492	976979	ST11	ST11	Peru	Thailand	28
875128	976979	ST11	ST11	Peru	Thailand	263
876988	976979	ST11	ST11	Peru	Thailand	53
22245	976979	ST11	ST11	Peru	Thailand	24
22246	976979	ST11	ST11	Peru	Thailand	24
689006	976979	ST11	ST11	Thailand	Thailand	4
689354	976979	ST11	ST11	Thailand	Thailand	4
975071	976979	ST11	ST11	Thailand	Thailand	28
514929	976979	ST11	ST11	Jordan	Thailand	26
518156	976979	ST11	ST11	Jordan	Thailand	25
518633	976979	ST11	ST11	Jordan	Thailand	30
518183	976979	ST11	ST11	Jordan	Thailand	25
662360	976979	ST11	ST11	Uganda	Thailand	200
893166	976979	ST11	ST11	Uganda	Thailand	26
21780	976979	ST11	ST11	Peru	Thailand	256
876278	976979	ST11	ST11	Peru	Thailand	235
876294	976979	ST11	ST11	Peru	Thailand	237
876816	976979	ST11	ST11	Peru	Thailand	29
875812	976979	ST11	ST11	Peru	Thailand	30
875580	976979	ST11	ST11	Peru	Thailand	28
876324	976979	ST11	ST11	Peru	Thailand	45
876332	976979	ST11	ST11	Peru	Thailand	232
875506	976979	ST11	ST11	Peru	Thailand	25
976285	976979	ST11	ST11	Thailand	Thailand	25
518624	976979	ST11	ST11	Jordan	Thailand	30
514974	976979	ST11	ST11	Jordan	Thailand	25
803756	976979	ST11	ST11	Georgia	Thailand	213
876286	976979	ST11	ST11	Peru	Thailand	236
875984	976979	ST11	ST11	Peru	Thailand	204
876042	976979	ST11	ST11	Peru	Thailand	235
876308	976979	ST11	ST11	Peru	Thailand	236
876156	976979	ST11	ST11	Peru	Thailand	234
876904	976979	ST11	ST11	Peru	Thailand	200
877062	976979	ST11	ST11	Peru	Thailand	206
367941	976979	ST11	ST11	Kenya	Thailand	196
367987	976979	ST11	ST11	Kenya	Thailand	25
876446	976979	ST11	ST11	Peru	Thailand	206
876778	976979	ST11	ST11	Peru	Thailand	39
367950	976979	ST11	ST11	Kenya	Thailand	400
367969	976979	ST11	ST11	Kenya	Thailand	400
367932	976979	ST11	ST11	Kenya	Thailand	196
21777	21779	ST11	ST11	Peru	Peru	7
22261	21779	ST11	ST11	Peru	Peru	3
791887	21779	ST11	ST11	Thailand	Peru	251
22269	21779	ST11	ST11	Peru	Peru	16
875678	21779	ST11	ST11	Peru	Peru	246
22260	21779	ST11	ST11	Peru	Peru	24
582081	21779	ST11	ST11	Thailand	Peru	281
582559	21779	ST11	ST11	Thailand	Peru	253
976979	21779	ST11	ST11	Thailand	Peru	255
22271	21779	ST11	ST11	Peru	Peru	260
876500	21779	ST11	ST11	Peru	Peru	207
876518	21779	ST11	ST11	Peru	Peru	207
580940	21779	ST11	ST11	Thailand	Peru	252
974971	21779	ST11	ST11	Thailand	Peru	256
515575	21779	ST11	ST11	Jordan	Peru	255
22270	21779	ST11	ST11	Peru	Peru	262
875598	21779	ST11	ST11	Peru	Peru	253
875320	21779	ST11	ST11	Peru	Peru	256
875136	21779	ST11	ST11	Peru	Peru	247
875492	21779	ST11	ST11	Peru	Peru	256
875128	21779	ST11	ST11	Peru	Peru	18
876988	21779	ST11	ST11	Peru	Peru	259
22245	21779	ST11	ST11	Peru	Peru	252
22246	21779	ST11	ST11	Peru	Peru	253
689006	21779	ST11	ST11	Thailand	Peru	257
689354	21779	ST11	ST11	Thailand	Peru	257
975071	21779	ST11	ST11	Thailand	Peru	256
514929	21779	ST11	ST11	Jordan	Peru	252
518156	21779	ST11	ST11	Jordan	Peru	252
518633	21779	ST11	ST11	Jordan	Peru	258
518183	21779	ST11	ST11	Jordan	Peru	253
662360	21779	ST11	ST11	Uganda	Peru	202
893166	21779	ST11	ST11	Uganda	Peru	253
21780	21779	ST11	ST11	Peru	Peru	1
876278	21779	ST11	ST11	Peru	Peru	211
876294	21779	ST11	ST11	Peru	Peru	212
876816	21779	ST11	ST11	Peru	Peru	256
875812	21779	ST11	ST11	Peru	Peru	257
875580	21779	ST11	ST11	Peru	Peru	256
876324	21779	ST11	ST11	Peru	Peru	256
876332	21779	ST11	ST11	Peru	Peru	208
875506	21779	ST11	ST11	Peru	Peru	252
976285	21779	ST11	ST11	Thailand	Peru	255
518624	21779	ST11	ST11	Jordan	Peru	258
514974	21779	ST11	ST11	Jordan	Peru	253
803756	21779	ST11	ST11	Georgia	Peru	251
876286	21779	ST11	ST11	Peru	Peru	211
875984	21779	ST11	ST11	Peru	Peru	258
876042	21779	ST11	ST11	Peru	Peru	210
876308	21779	ST11	ST11	Peru	Peru	211
876156	21779	ST11	ST11	Peru	Peru	209
876904	21779	ST11	ST11	Peru	Peru	210
877062	21779	ST11	ST11	Peru	Peru	259
367941	21779	ST11	ST11	Kenya	Peru	203
367987	21779	ST11	ST11	Kenya	Peru	249
876446	21779	ST11	ST11	Peru	Peru	213
876778	21779	ST11	ST11	Peru	Peru	248
367950	21779	ST11	ST11	Kenya	Peru	440
367969	21779	ST11	ST11	Kenya	Peru	441
367932	21779	ST11	ST11	Kenya	Peru	203
21777	22271	ST11	ST11	Peru	Peru	262
22261	22271	ST11	ST11	Peru	Peru	258
791887	22271	ST11	ST11	Thailand	Peru	209
22269	22271	ST11	ST11	Peru	Peru	263
875678	22271	ST11	ST11	Peru	Peru	206
22260	22271	ST11	ST11	Peru	Peru	274
582081	22271	ST11	ST11	Thailand	Peru	240
582559	22271	ST11	ST11	Thailand	Peru	213
976979	22271	ST11	ST11	Thailand	Peru	217
21779	22271	ST11	ST11	Peru	Peru	260
876500	22271	ST11	ST11	Peru	Peru	244
876518	22271	ST11	ST11	Peru	Peru	244
580940	22271	ST11	ST11	Thailand	Peru	211
974971	22271	ST11	ST11	Thailand	Peru	219
515575	22271	ST11	ST11	Jordan	Peru	216
22270	22271	ST11	ST11	Peru	Peru	0
875598	22271	ST11	ST11	Peru	Peru	214
875320	22271	ST11	ST11	Peru	Peru	216
875136	22271	ST11	ST11	Peru	Peru	210
875492	22271	ST11	ST11	Peru	Peru	216
875128	22271	ST11	ST11	Peru	Peru	268
876988	22271	ST11	ST11	Peru	Peru	217
22245	22271	ST11	ST11	Peru	Peru	213
22246	22271	ST11	ST11	Peru	Peru	213
689006	22271	ST11	ST11	Thailand	Peru	218
689354	22271	ST11	ST11	Thailand	Peru	218
975071	22271	ST11	ST11	Thailand	Peru	219
514929	22271	ST11	ST11	Jordan	Peru	213
518156	22271	ST11	ST11	Jordan	Peru	212
518633	22271	ST11	ST11	Jordan	Peru	218
518183	22271	ST11	ST11	Jordan	Peru	213
662360	22271	ST11	ST11	Uganda	Peru	206
893166	22271	ST11	ST11	Uganda	Peru	214
21780	22271	ST11	ST11	Peru	Peru	261
876278	22271	ST11	ST11	Peru	Peru	247
876294	22271	ST11	ST11	Peru	Peru	249
876816	22271	ST11	ST11	Peru	Peru	217
875812	22271	ST11	ST11	Peru	Peru	216
875580	22271	ST11	ST11	Peru	Peru	216
876324	22271	ST11	ST11	Peru	Peru	217
876332	22271	ST11	ST11	Peru	Peru	244
875506	22271	ST11	ST11	Peru	Peru	213
976285	22271	ST11	ST11	Thailand	Peru	217
518624	22271	ST11	ST11	Jordan	Peru	218
514974	22271	ST11	ST11	Jordan	Peru	213
803756	22271	ST11	ST11	Georgia	Peru	219
876286	22271	ST11	ST11	Peru	Peru	248
875984	22271	ST11	ST11	Peru	Peru	210
876042	22271	ST11	ST11	Peru	Peru	247
876308	22271	ST11	ST11	Peru	Peru	248
876156	22271	ST11	ST11	Peru	Peru	246
876904	22271	ST11	ST11	Peru	Peru	211
877062	22271	ST11	ST11	Peru	Peru	205
367941	22271	ST11	ST11	Kenya	Peru	208
367987	22271	ST11	ST11	Kenya	Peru	210
876446	22271	ST11	ST11	Peru	Peru	217
876778	22271	ST11	ST11	Peru	Peru	210
367950	22271	ST11	ST11	Kenya	Peru	404
367969	22271	ST11	ST11	Kenya	Peru	404
367932	22271	ST11	ST11	Kenya	Peru	208
21777	876500	ST11	ST11	Peru	Peru	207
22261	876500	ST11	ST11	Peru	Peru	204
791887	876500	ST11	ST11	Thailand	Peru	227
22269	876500	ST11	ST11	Peru	Peru	210
875678	876500	ST11	ST11	Peru	Peru	222
22260	876500	ST11	ST11	Peru	Peru	219
582081	876500	ST11	ST11	Thailand	Peru	258
582559	876500	ST11	ST11	Thailand	Peru	230
976979	876500	ST11	ST11	Thailand	Peru	233
21779	876500	ST11	ST11	Peru	Peru	207
22271	876500	ST11	ST11	Peru	Peru	244
876518	876500	ST11	ST11	Peru	Peru	1
580940	876500	ST11	ST11	Thailand	Peru	228
974971	876500	ST11	ST11	Thailand	Peru	236
515575	876500	ST11	ST11	Jordan	Peru	232
22270	876500	ST11	ST11	Peru	Peru	243
875598	876500	ST11	ST11	Peru	Peru	228
875320	876500	ST11	ST11	Peru	Peru	231
875136	876500	ST11	ST11	Peru	Peru	223
875492	876500	ST11	ST11	Peru	Peru	230
875128	876500	ST11	ST11	Peru	Peru	214
876988	876500	ST11	ST11	Peru	Peru	236
22245	876500	ST11	ST11	Peru	Peru	228
22246	876500	ST11	ST11	Peru	Peru	229
689006	876500	ST11	ST11	Thailand	Peru	236
689354	876500	ST11	ST11	Thailand	Peru	236
975071	876500	ST11	ST11	Thailand	Peru	236
514929	876500	ST11	ST11	Jordan	Peru	228
518156	876500	ST11	ST11	Jordan	Peru	227
518633	876500	ST11	ST11	Jordan	Peru	234
518183	876500	ST11	ST11	Jordan	Peru	229
662360	876500	ST11	ST11	Uganda	Peru	135
893166	876500	ST11	ST11	Uganda	Peru	231
21780	876500	ST11	ST11	Peru	Peru	207
876278	876500	ST11	ST11	Peru	Peru	9
876294	876500	ST11	ST11	Peru	Peru	10
876816	876500	ST11	ST11	Peru	Peru	232
875812	876500	ST11	ST11	Peru	Peru	231
875580	876500	ST11	ST11	Peru	Peru	231
876324	876500	ST11	ST11	Peru	Peru	231
876332	876500	ST11	ST11	Peru	Peru	5
875506	876500	ST11	ST11	Peru	Peru	227
976285	876500	ST11	ST11	Thailand	Peru	235
518624	876500	ST11	ST11	Jordan	Peru	234
514974	876500	ST11	ST11	Jordan	Peru	229
803756	876500	ST11	ST11	Georgia	Peru	235
876286	876500	ST11	ST11	Peru	Peru	9
875984	876500	ST11	ST11	Peru	Peru	222
876042	876500	ST11	ST11	Peru	Peru	8
876308	876500	ST11	ST11	Peru	Peru	9
876156	876500	ST11	ST11	Peru	Peru	6
876904	876500	ST11	ST11	Peru	Peru	153
877062	876500	ST11	ST11	Peru	Peru	233
367941	876500	ST11	ST11	Kenya	Peru	150
367987	876500	ST11	ST11	Kenya	Peru	226
876446	876500	ST11	ST11	Peru	Peru	160
876778	876500	ST11	ST11	Peru	Peru	225
367950	876500	ST11	ST11	Kenya	Peru	391
367969	876500	ST11	ST11	Kenya	Peru	391
367932	876500	ST11	ST11	Kenya	Peru	150
21777	876518	ST11	ST11	Peru	Peru	207
22261	876518	ST11	ST11	Peru	Peru	204
791887	876518	ST11	ST11	Thailand	Peru	226
22269	876518	ST11	ST11	Peru	Peru	210
875678	876518	ST11	ST11	Peru	Peru	221
22260	876518	ST11	ST11	Peru	Peru	219
582081	876518	ST11	ST11	Thailand	Peru	258
582559	876518	ST11	ST11	Thailand	Peru	229
976979	876518	ST11	ST11	Thailand	Peru	232
21779	876518	ST11	ST11	Peru	Peru	207
22271	876518	ST11	ST11	Peru	Peru	244
876500	876518	ST11	ST11	Peru	Peru	1
580940	876518	ST11	ST11	Thailand	Peru	227
974971	876518	ST11	ST11	Thailand	Peru	235
515575	876518	ST11	ST11	Jordan	Peru	231
22270	876518	ST11	ST11	Peru	Peru	243
875598	876518	ST11	ST11	Peru	Peru	227
875320	876518	ST11	ST11	Peru	Peru	230
875136	876518	ST11	ST11	Peru	Peru	222
875492	876518	ST11	ST11	Peru	Peru	229
875128	876518	ST11	ST11	Peru	Peru	214
876988	876518	ST11	ST11	Peru	Peru	235
22245	876518	ST11	ST11	Peru	Peru	227
22246	876518	ST11	ST11	Peru	Peru	228
689006	876518	ST11	ST11	Thailand	Peru	235
689354	876518	ST11	ST11	Thailand	Peru	235
975071	876518	ST11	ST11	Thailand	Peru	235
514929	876518	ST11	ST11	Jordan	Peru	227
518156	876518	ST11	ST11	Jordan	Peru	226
518633	876518	ST11	ST11	Jordan	Peru	233
518183	876518	ST11	ST11	Jordan	Peru	228
662360	876518	ST11	ST11	Uganda	Peru	134
893166	876518	ST11	ST11	Uganda	Peru	230
21780	876518	ST11	ST11	Peru	Peru	207
876278	876518	ST11	ST11	Peru	Peru	8
876294	876518	ST11	ST11	Peru	Peru	9
876816	876518	ST11	ST11	Peru	Peru	231
875812	876518	ST11	ST11	Peru	Peru	230
875580	876518	ST11	ST11	Peru	Peru	230
876324	876518	ST11	ST11	Peru	Peru	230
876332	876518	ST11	ST11	Peru	Peru	4
875506	876518	ST11	ST11	Peru	Peru	226
976285	876518	ST11	ST11	Thailand	Peru	234
518624	876518	ST11	ST11	Jordan	Peru	233
514974	876518	ST11	ST11	Jordan	Peru	228
803756	876518	ST11	ST11	Georgia	Peru	234
876286	876518	ST11	ST11	Peru	Peru	8
875984	876518	ST11	ST11	Peru	Peru	221
876042	876518	ST11	ST11	Peru	Peru	7
876308	876518	ST11	ST11	Peru	Peru	8
876156	876518	ST11	ST11	Peru	Peru	5
876904	876518	ST11	ST11	Peru	Peru	152
877062	876518	ST11	ST11	Peru	Peru	232
367941	876518	ST11	ST11	Kenya	Peru	149
367987	876518	ST11	ST11	Kenya	Peru	225
876446	876518	ST11	ST11	Peru	Peru	159
876778	876518	ST11	ST11	Peru	Peru	224
367950	876518	ST11	ST11	Kenya	Peru	390
367969	876518	ST11	ST11	Kenya	Peru	390
367932	876518	ST11	ST11	Kenya	Peru	149
21777	580940	ST11	ST11	Peru	Thailand	255
22261	580940	ST11	ST11	Peru	Thailand	251
791887	580940	ST11	ST11	Thailand	Thailand	1
22269	580940	ST11	ST11	Peru	Thailand	257
875678	580940	ST11	ST11	Peru	Thailand	15
22260	580940	ST11	ST11	Peru	Thailand	266
582081	580940	ST11	ST11	Thailand	Thailand	46
582559	580940	ST11	ST11	Thailand	Thailand	1
976979	580940	ST11	ST11	Thailand	Thailand	24
21779	580940	ST11	ST11	Peru	Thailand	252
22271	580940	ST11	ST11	Peru	Thailand	211
876500	580940	ST11	ST11	Peru	Thailand	228
876518	580940	ST11	ST11	Peru	Thailand	227
974971	580940	ST11	ST11	Thailand	Thailand	26
515575	580940	ST11	ST11	Jordan	Thailand	20
22270	580940	ST11	ST11	Peru	Thailand	211
875598	580940	ST11	ST11	Peru	Thailand	19
875320	580940	ST11	ST11	Peru	Thailand	20
875136	580940	ST11	ST11	Peru	Thailand	28
875492	580940	ST11	ST11	Peru	Thailand	21
875128	580940	ST11	ST11	Peru	Thailand	260
876988	580940	ST11	ST11	Peru	Thailand	46
22245	580940	ST11	ST11	Peru	Thailand	18
22246	580940	ST11	ST11	Peru	Thailand	18
689006	580940	ST11	ST11	Thailand	Thailand	25
689354	580940	ST11	ST11	Thailand	Thailand	25
975071	580940	ST11	ST11	Thailand	Thailand	26
514929	580940	ST11	ST11	Jordan	Thailand	18
518156	580940	ST11	ST11	Jordan	Thailand	17
518633	580940	ST11	ST11	Jordan	Thailand	22
518183	580940	ST11	ST11	Jordan	Thailand	17
662360	580940	ST11	ST11	Uganda	Thailand	195
893166	580940	ST11	ST11	Uganda	Thailand	18
21780	580940	ST11	ST11	Peru	Thailand	253
876278	580940	ST11	ST11	Peru	Thailand	230
876294	580940	ST11	ST11	Peru	Thailand	232
876816	580940	ST11	ST11	Peru	Thailand	22
875812	580940	ST11	ST11	Peru	Thailand	23
875580	580940	ST11	ST11	Peru	Thailand	21
876324	580940	ST11	ST11	Peru	Thailand	36
876332	580940	ST11	ST11	Peru	Thailand	227
875506	580940	ST11	ST11	Peru	Thailand	18
976285	580940	ST11	ST11	Thailand	Thailand	21
518624	580940	ST11	ST11	Jordan	Thailand	22
514974	580940	ST11	ST11	Jordan	Thailand	17
803756	580940	ST11	ST11	Georgia	Thailand	207
876286	580940	ST11	ST11	Peru	Thailand	231
875984	580940	ST11	ST11	Peru	Thailand	196
876042	580940	ST11	ST11	Peru	Thailand	230
876308	580940	ST11	ST11	Peru	Thailand	231
876156	580940	ST11	ST11	Peru	Thailand	229
876904	580940	ST11	ST11	Peru	Thailand	193
877062	580940	ST11	ST11	Peru	Thailand	199
367941	580940	ST11	ST11	Kenya	Thailand	189
367987	580940	ST11	ST11	Kenya	Thailand	16
876446	580940	ST11	ST11	Peru	Thailand	199
876778	580940	ST11	ST11	Peru	Thailand	30
367950	580940	ST11	ST11	Kenya	Thailand	393
367969	580940	ST11	ST11	Kenya	Thailand	393
367932	580940	ST11	ST11	Kenya	Thailand	189
21777	974971	ST11	ST11	Peru	Thailand	262
22261	974971	ST11	ST11	Peru	Thailand	257
791887	974971	ST11	ST11	Thailand	Thailand	27
22269	974971	ST11	ST11	Peru	Thailand	263
875678	974971	ST11	ST11	Peru	Thailand	25
22260	974971	ST11	ST11	Peru	Thailand	270
582081	974971	ST11	ST11	Thailand	Thailand	51
582559	974971	ST11	ST11	Thailand	Thailand	27
976979	974971	ST11	ST11	Thailand	Thailand	29
21779	974971	ST11	ST11	Peru	Thailand	256
22271	974971	ST11	ST11	Peru	Thailand	219
876500	974971	ST11	ST11	Peru	Thailand	236
876518	974971	ST11	ST11	Peru	Thailand	235
580940	974971	ST11	ST11	Thailand	Thailand	26
515575	974971	ST11	ST11	Jordan	Thailand	30
22270	974971	ST11	ST11	Peru	Thailand	220
875598	974971	ST11	ST11	Peru	Thailand	28
875320	974971	ST11	ST11	Peru	Thailand	30
875136	974971	ST11	ST11	Peru	Thailand	38
875492	974971	ST11	ST11	Peru	Thailand	30
875128	974971	ST11	ST11	Peru	Thailand	266
876988	974971	ST11	ST11	Peru	Thailand	55
22245	974971	ST11	ST11	Peru	Thailand	27
22246	974971	ST11	ST11	Peru	Thailand	27
689006	974971	ST11	ST11	Thailand	Thailand	29
689354	974971	ST11	ST11	Thailand	Thailand	29
975071	974971	ST11	ST11	Thailand	Thailand	6
514929	974971	ST11	ST11	Jordan	Thailand	28
518156	974971	ST11	ST11	Jordan	Thailand	27
518633	974971	ST11	ST11	Jordan	Thailand	32
518183	974971	ST11	ST11	Jordan	Thailand	27
662360	974971	ST11	ST11	Uganda	Thailand	203
893166	974971	ST11	ST11	Uganda	Thailand	28
21780	974971	ST11	ST11	Peru	Thailand	258
876278	974971	ST11	ST11	Peru	Thailand	239
876294	974971	ST11	ST11	Peru	Thailand	241
876816	974971	ST11	ST11	Peru	Thailand	31
875812	974971	ST11	ST11	Peru	Thailand	32
875580	974971	ST11	ST11	Peru	Thailand	30
876324	974971	ST11	ST11	Peru	Thailand	46
876332	974971	ST11	ST11	Peru	Thailand	236
875506	974971	ST11	ST11	Peru	Thailand	27
976285	974971	ST11	ST11	Thailand	Thailand	22
518624	974971	ST11	ST11	Jordan	Thailand	32
514974	974971	ST11	ST11	Jordan	Thailand	27
803756	974971	ST11	ST11	Georgia	Thailand	215
876286	974971	ST11	ST11	Peru	Thailand	240
875984	974971	ST11	ST11	Peru	Thailand	204
876042	974971	ST11	ST11	Peru	Thailand	239
876308	974971	ST11	ST11	Peru	Thailand	240
876156	974971	ST11	ST11	Peru	Thailand	238
876904	974971	ST11	ST11	Peru	Thailand	200
877062	974971	ST11	ST11	Peru	Thailand	207
367941	974971	ST11	ST11	Kenya	Thailand	197
367987	974971	ST11	ST11	Kenya	Thailand	27
876446	974971	ST11	ST11	Peru	Thailand	206
876778	974971	ST11	ST11	Peru	Thailand	41
367950	974971	ST11	ST11	Kenya	Thailand	399
367969	974971	ST11	ST11	Kenya	Thailand	401
367932	974971	ST11	ST11	Kenya	Thailand	197
21777	515575	ST11	ST11	Peru	Jordan	259
22261	515575	ST11	ST11	Peru	Jordan	255
791887	515575	ST11	ST11	Thailand	Jordan	20
22269	515575	ST11	ST11	Peru	Jordan	260
875678	515575	ST11	ST11	Peru	Jordan	19
22260	515575	ST11	ST11	Peru	Jordan	269
582081	515575	ST11	ST11	Thailand	Jordan	51
582559	515575	ST11	ST11	Thailand	Jordan	21
976979	515575	ST11	ST11	Thailand	Jordan	28
21779	515575	ST11	ST11	Peru	Jordan	255
22271	515575	ST11	ST11	Peru	Jordan	216
876500	515575	ST11	ST11	Peru	Jordan	232
876518	515575	ST11	ST11	Peru	Jordan	231
580940	515575	ST11	ST11	Thailand	Jordan	20
974971	515575	ST11	ST11	Thailand	Jordan	30
22270	515575	ST11	ST11	Peru	Jordan	216
875598	515575	ST11	ST11	Peru	Jordan	22
875320	515575	ST11	ST11	Peru	Jordan	24
875136	515575	ST11	ST11	Peru	Jordan	33
875492	515575	ST11	ST11	Peru	Jordan	24
875128	515575	ST11	ST11	Peru	Jordan	263
876988	515575	ST11	ST11	Peru	Jordan	49
22245	515575	ST11	ST11	Peru	Jordan	21
22246	515575	ST11	ST11	Peru	Jordan	21
689006	515575	ST11	ST11	Thailand	Jordan	28
689354	515575	ST11	ST11	Thailand	Jordan	28
975071	515575	ST11	ST11	Thailand	Jordan	30
514929	515575	ST11	ST11	Jordan	Jordan	4
518156	515575	ST11	ST11	Jordan	Jordan	3
518633	515575	ST11	ST11	Jordan	Jordan	8
518183	515575	ST11	ST11	Jordan	Jordan	3
662360	515575	ST11	ST11	Uganda	Jordan	199
893166	515575	ST11	ST11	Uganda	Jordan	20
21780	515575	ST11	ST11	Peru	Jordan	256
876278	515575	ST11	ST11	Peru	Jordan	234
876294	515575	ST11	ST11	Peru	Jordan	236
876816	515575	ST11	ST11	Peru	Jordan	25
875812	515575	ST11	ST11	Peru	Jordan	26
875580	515575	ST11	ST11	Peru	Jordan	24
876324	515575	ST11	ST11	Peru	Jordan	41
876332	515575	ST11	ST11	Peru	Jordan	231
875506	515575	ST11	ST11	Peru	Jordan	21
976285	515575	ST11	ST11	Thailand	Jordan	26
518624	515575	ST11	ST11	Jordan	Jordan	8
514974	515575	ST11	ST11	Jordan	Jordan	3
803756	515575	ST11	ST11	Georgia	Jordan	211
876286	515575	ST11	ST11	Peru	Jordan	235
875984	515575	ST11	ST11	Peru	Jordan	201
876042	515575	ST11	ST11	Peru	Jordan	234
876308	515575	ST11	ST11	Peru	Jordan	235
876156	515575	ST11	ST11	Peru	Jordan	233
876904	515575	ST11	ST11	Peru	Jordan	197
877062	515575	ST11	ST11	Peru	Jordan	202
367941	515575	ST11	ST11	Kenya	Jordan	192
367987	515575	ST11	ST11	Kenya	Jordan	21
876446	515575	ST11	ST11	Peru	Jordan	202
876778	515575	ST11	ST11	Peru	Jordan	35
367950	515575	ST11	ST11	Kenya	Jordan	397
367969	515575	ST11	ST11	Kenya	Jordan	397
367932	515575	ST11	ST11	Kenya	Jordan	192
21777	22270	ST11	ST11	Peru	Peru	263
22261	22270	ST11	ST11	Peru	Peru	259
791887	22270	ST11	ST11	Thailand	Peru	209
22269	22270	ST11	ST11	Peru	Peru	264
875678	22270	ST11	ST11	Peru	Peru	206
22260	22270	ST11	ST11	Peru	Peru	275
582081	22270	ST11	ST11	Thailand	Peru	240
582559	22270	ST11	ST11	Thailand	Peru	213
976979	22270	ST11	ST11	Thailand	Peru	217
21779	22270	ST11	ST11	Peru	Peru	262
22271	22270	ST11	ST11	Peru	Peru	0
876500	22270	ST11	ST11	Peru	Peru	243
876518	22270	ST11	ST11	Peru	Peru	243
580940	22270	ST11	ST11	Thailand	Peru	211
974971	22270	ST11	ST11	Thailand	Peru	220
515575	22270	ST11	ST11	Jordan	Peru	216
875598	22270	ST11	ST11	Peru	Peru	214
875320	22270	ST11	ST11	Peru	Peru	216
875136	22270	ST11	ST11	Peru	Peru	210
875492	22270	ST11	ST11	Peru	Peru	216
875128	22270	ST11	ST11	Peru	Peru	269
876988	22270	ST11	ST11	Peru	Peru	217
22245	22270	ST11	ST11	Peru	Peru	213
22246	22270	ST11	ST11	Peru	Peru	213
689006	22270	ST11	ST11	Thailand	Peru	218
689354	22270	ST11	ST11	Thailand	Peru	218
975071	22270	ST11	ST11	Thailand	Peru	220
514929	22270	ST11	ST11	Jordan	Peru	213
518156	22270	ST11	ST11	Jordan	Peru	212
518633	22270	ST11	ST11	Jordan	Peru	218
518183	22270	ST11	ST11	Jordan	Peru	213
662360	22270	ST11	ST11	Uganda	Peru	205
893166	22270	ST11	ST11	Uganda	Peru	214
21780	22270	ST11	ST11	Peru	Peru	262
876278	22270	ST11	ST11	Peru	Peru	247
876294	22270	ST11	ST11	Peru	Peru	248
876816	22270	ST11	ST11	Peru	Peru	217
875812	22270	ST11	ST11	Peru	Peru	216
875580	22270	ST11	ST11	Peru	Peru	216
876324	22270	ST11	ST11	Peru	Peru	217
876332	22270	ST11	ST11	Peru	Peru	244
875506	22270	ST11	ST11	Peru	Peru	213
976285	22270	ST11	ST11	Thailand	Peru	217
518624	22270	ST11	ST11	Jordan	Peru	218
514974	22270	ST11	ST11	Jordan	Peru	213
803756	22270	ST11	ST11	Georgia	Peru	218
876286	22270	ST11	ST11	Peru	Peru	247
875984	22270	ST11	ST11	Peru	Peru	210
876042	22270	ST11	ST11	Peru	Peru	246
876308	22270	ST11	ST11	Peru	Peru	247
876156	22270	ST11	ST11	Peru	Peru	245
876904	22270	ST11	ST11	Peru	Peru	210
877062	22270	ST11	ST11	Peru	Peru	205
367941	22270	ST11	ST11	Kenya	Peru	207
367987	22270	ST11	ST11	Kenya	Peru	210
876446	22270	ST11	ST11	Peru	Peru	217
876778	22270	ST11	ST11	Peru	Peru	210
367950	22270	ST11	ST11	Kenya	Peru	403
367969	22270	ST11	ST11	Kenya	Peru	403
367932	22270	ST11	ST11	Kenya	Peru	207
21777	875598	ST11	ST11	Peru	Peru	256
22261	875598	ST11	ST11	Peru	Peru	253
791887	875598	ST11	ST11	Thailand	Peru	19
22269	875598	ST11	ST11	Peru	Peru	257
875678	875598	ST11	ST11	Peru	Peru	7
22260	875598	ST11	ST11	Peru	Peru	267
582081	875598	ST11	ST11	Thailand	Peru	51
582559	875598	ST11	ST11	Thailand	Peru	20
976979	875598	ST11	ST11	Thailand	Peru	26
21779	875598	ST11	ST11	Peru	Peru	253
22271	875598	ST11	ST11	Peru	Peru	214
876500	875598	ST11	ST11	Peru	Peru	228
876518	875598	ST11	ST11	Peru	Peru	227
580940	875598	ST11	ST11	Thailand	Peru	19
974971	875598	ST11	ST11	Thailand	Peru	28
515575	875598	ST11	ST11	Jordan	Peru	22
22270	875598	ST11	ST11	Peru	Peru	214
875320	875598	ST11	ST11	Peru	Peru	10
875136	875598	ST11	ST11	Peru	Peru	31
875492	875598	ST11	ST11	Peru	Peru	4
875128	875598	ST11	ST11	Peru	Peru	261
876988	875598	ST11	ST11	Peru	Peru	35
22245	875598	ST11	ST11	Peru	Peru	9
22246	875598	ST11	ST11	Peru	Peru	9
689006	875598	ST11	ST11	Thailand	Peru	26
689354	875598	ST11	ST11	Thailand	Peru	26
975071	875598	ST11	ST11	Thailand	Peru	28
514929	875598	ST11	ST11	Jordan	Peru	20
518156	875598	ST11	ST11	Jordan	Peru	19
518633	875598	ST11	ST11	Jordan	Peru	24
518183	875598	ST11	ST11	Jordan	Peru	19
662360	875598	ST11	ST11	Uganda	Peru	197
893166	875598	ST11	ST11	Uganda	Peru	20
21780	875598	ST11	ST11	Peru	Peru	254
876278	875598	ST11	ST11	Peru	Peru	230
876294	875598	ST11	ST11	Peru	Peru	232
876816	875598	ST11	ST11	Peru	Peru	7
875812	875598	ST11	ST11	Peru	Peru	6
875580	875598	ST11	ST11	Peru	Peru	4
876324	875598	ST11	ST11	Peru	Peru	39
876332	875598	ST11	ST11	Peru	Peru	227
875506	875598	ST11	ST11	Peru	Peru	1
976285	875598	ST11	ST11	Thailand	Peru	24
518624	875598	ST11	ST11	Jordan	Peru	24
514974	875598	ST11	ST11	Jordan	Peru	19
803756	875598	ST11	ST11	Georgia	Peru	209
876286	875598	ST11	ST11	Peru	Peru	231
875984	875598	ST11	ST11	Peru	Peru	198
876042	875598	ST11	ST11	Peru	Peru	230
876308	875598	ST11	ST11	Peru	Peru	231
876156	875598	ST11	ST11	Peru	Peru	229
876904	875598	ST11	ST11	Peru	Peru	195
877062	875598	ST11	ST11	Peru	Peru	201
367941	875598	ST11	ST11	Kenya	Peru	190
367987	875598	ST11	ST11	Kenya	Peru	19
876446	875598	ST11	ST11	Peru	Peru	201
876778	875598	ST11	ST11	Peru	Peru	32
367950	875598	ST11	ST11	Kenya	Peru	396
367969	875598	ST11	ST11	Kenya	Peru	396
367932	875598	ST11	ST11	Kenya	Peru	190
21777	875320	ST11	ST11	Peru	Peru	260
22261	875320	ST11	ST11	Peru	Peru	256
791887	875320	ST11	ST11	Thailand	Peru	21
22269	875320	ST11	ST11	Peru	Peru	260
875678	875320	ST11	ST11	Peru	Peru	8
22260	875320	ST11	ST11	Peru	Peru	269
582081	875320	ST11	ST11	Thailand	Peru	53
582559	875320	ST11	ST11	Thailand	Peru	21
976979	875320	ST11	ST11	Thailand	Peru	28
21779	875320	ST11	ST11	Peru	Peru	256
22271	875320	ST11	ST11	Peru	Peru	216
876500	875320	ST11	ST11	Peru	Peru	231
876518	875320	ST11	ST11	Peru	Peru	230
580940	875320	ST11	ST11	Thailand	Peru	20
974971	875320	ST11	ST11	Thailand	Peru	30
515575	875320	ST11	ST11	Jordan	Peru	24
22270	875320	ST11	ST11	Peru	Peru	216
875598	875320	ST11	ST11	Peru	Peru	10
875136	875320	ST11	ST11	Peru	Peru	31
875492	875320	ST11	ST11	Peru	Peru	12
875128	875320	ST11	ST11	Peru	Peru	264
876988	875320	ST11	ST11	Peru	Peru	37
22245	875320	ST11	ST11	Peru	Peru	11
22246	875320	ST11	ST11	Peru	Peru	11
689006	875320	ST11	ST11	Thailand	Peru	28
689354	875320	ST11	ST11	Thailand	Peru	28
975071	875320	ST11	ST11	Thailand	Peru	29
514929	875320	ST11	ST11	Jordan	Peru	22
518156	875320	ST11	ST11	Jordan	Peru	21
518633	875320	ST11	ST11	Jordan	Peru	26
518183	875320	ST11	ST11	Jordan	Peru	21
662360	875320	ST11	ST11	Uganda	Peru	198
893166	875320	ST11	ST11	Uganda	Peru	22
21780	875320	ST11	ST11	Peru	Peru	257
876278	875320	ST11	ST11	Peru	Peru	233
876294	875320	ST11	ST11	Peru	Peru	235
876816	875320	ST11	ST11	Peru	Peru	13
875812	875320	ST11	ST11	Peru	Peru	14
875580	875320	ST11	ST11	Peru	Peru	12
876324	875320	ST11	ST11	Peru	Peru	41
876332	875320	ST11	ST11	Peru	Peru	230
875506	875320	ST11	ST11	Peru	Peru	9
976285	875320	ST11	ST11	Thailand	Peru	26
518624	875320	ST11	ST11	Jordan	Peru	26
514974	875320	ST11	ST11	Jordan	Peru	21
803756	875320	ST11	ST11	Georgia	Peru	210
876286	875320	ST11	ST11	Peru	Peru	234
875984	875320	ST11	ST11	Peru	Peru	199
876042	875320	ST11	ST11	Peru	Peru	233
876308	875320	ST11	ST11	Peru	Peru	234
876156	875320	ST11	ST11	Peru	Peru	232
876904	875320	ST11	ST11	Peru	Peru	196
877062	875320	ST11	ST11	Peru	Peru	202
367941	875320	ST11	ST11	Kenya	Peru	191
367987	875320	ST11	ST11	Kenya	Peru	21
876446	875320	ST11	ST11	Peru	Peru	202
876778	875320	ST11	ST11	Peru	Peru	34
367950	875320	ST11	ST11	Kenya	Peru	396
367969	875320	ST11	ST11	Kenya	Peru	396
367932	875320	ST11	ST11	Kenya	Peru	191
21777	875136	ST11	ST11	Peru	Peru	251
22261	875136	ST11	ST11	Peru	Peru	248
791887	875136	ST11	ST11	Thailand	Peru	28
22269	875136	ST11	ST11	Peru	Peru	252
875678	875136	ST11	ST11	Peru	Peru	28
22260	875136	ST11	ST11	Peru	Peru	261
582081	875136	ST11	ST11	Thailand	Peru	60
582559	875136	ST11	ST11	Thailand	Peru	29
976979	875136	ST11	ST11	Thailand	Peru	36
21779	875136	ST11	ST11	Peru	Peru	247
22271	875136	ST11	ST11	Peru	Peru	210
876500	875136	ST11	ST11	Peru	Peru	223
876518	875136	ST11	ST11	Peru	Peru	222
580940	875136	ST11	ST11	Thailand	Peru	28
974971	875136	ST11	ST11	Thailand	Peru	38
515575	875136	ST11	ST11	Jordan	Peru	33
22270	875136	ST11	ST11	Peru	Peru	210
875598	875136	ST11	ST11	Peru	Peru	31
875320	875136	ST11	ST11	Peru	Peru	31
875492	875136	ST11	ST11	Peru	Peru	33
875128	875136	ST11	ST11	Peru	Peru	255
876988	875136	ST11	ST11	Peru	Peru	58
22245	875136	ST11	ST11	Peru	Peru	29
22246	875136	ST11	ST11	Peru	Peru	29
689006	875136	ST11	ST11	Thailand	Peru	38
689354	875136	ST11	ST11	Thailand	Peru	38
975071	875136	ST11	ST11	Thailand	Peru	38
514929	875136	ST11	ST11	Jordan	Peru	31
518156	875136	ST11	ST11	Jordan	Peru	30
518633	875136	ST11	ST11	Jordan	Peru	35
518183	875136	ST11	ST11	Jordan	Peru	30
662360	875136	ST11	ST11	Uganda	Peru	192
893166	875136	ST11	ST11	Uganda	Peru	30
21780	875136	ST11	ST11	Peru	Peru	248
876278	875136	ST11	ST11	Peru	Peru	223
876294	875136	ST11	ST11	Peru	Peru	225
876816	875136	ST11	ST11	Peru	Peru	34
875812	875136	ST11	ST11	Peru	Peru	35
875580	875136	ST11	ST11	Peru	Peru	33
876324	875136	ST11	ST11	Peru	Peru	24
876332	875136	ST11	ST11	Peru	Peru	222
875506	875136	ST11	ST11	Peru	Peru	30
976285	875136	ST11	ST11	Thailand	Peru	34
518624	875136	ST11	ST11	Jordan	Peru	35
514974	875136	ST11	ST11	Jordan	Peru	30
803756	875136	ST11	ST11	Georgia	Peru	204
876286	875136	ST11	ST11	Peru	Peru	224
875984	875136	ST11	ST11	Peru	Peru	192
876042	875136	ST11	ST11	Peru	Peru	223
876308	875136	ST11	ST11	Peru	Peru	224
876156	875136	ST11	ST11	Peru	Peru	223
876904	875136	ST11	ST11	Peru	Peru	190
877062	875136	ST11	ST11	Peru	Peru	196
367941	875136	ST11	ST11	Kenya	Peru	186
367987	875136	ST11	ST11	Kenya	Peru	28
876446	875136	ST11	ST11	Peru	Peru	196
876778	875136	ST11	ST11	Peru	Peru	17
367950	875136	ST11	ST11	Kenya	Peru	388
367969	875136	ST11	ST11	Kenya	Peru	388
367932	875136	ST11	ST11	Kenya	Peru	186
21777	875492	ST11	ST11	Peru	Peru	260
22261	875492	ST11	ST11	Peru	Peru	256
791887	875492	ST11	ST11	Thailand	Peru	21
22269	875492	ST11	ST11	Peru	Peru	260
875678	875492	ST11	ST11	Peru	Peru	9
22260	875492	ST11	ST11	Peru	Peru	269
582081	875492	ST11	ST11	Thailand	Peru	53
582559	875492	ST11	ST11	Thailand	Peru	22
976979	875492	ST11	ST11	Thailand	Peru	28
21779	875492	ST11	ST11	Peru	Peru	256
22271	875492	ST11	ST11	Peru	Peru	216
876500	875492	ST11	ST11	Peru	Peru	230
876518	875492	ST11	ST11	Peru	Peru	229
580940	875492	ST11	ST11	Thailand	Peru	21
974971	875492	ST11	ST11	Thailand	Peru	30
515575	875492	ST11	ST11	Jordan	Peru	24
22270	875492	ST11	ST11	Peru	Peru	216
875598	875492	ST11	ST11	Peru	Peru	4
875320	875492	ST11	ST11	Peru	Peru	12
875136	875492	ST11	ST11	Peru	Peru	33
875128	875492	ST11	ST11	Peru	Peru	264
876988	875492	ST11	ST11	Peru	Peru	37
22245	875492	ST11	ST11	Peru	Peru	11
22246	875492	ST11	ST11	Peru	Peru	11
689006	875492	ST11	ST11	Thailand	Peru	28
689354	875492	ST11	ST11	Thailand	Peru	28
975071	875492	ST11	ST11	Thailand	Peru	30
514929	875492	ST11	ST11	Jordan	Peru	22
518156	875492	ST11	ST11	Jordan	Peru	21
518633	875492	ST11	ST11	Jordan	Peru	26
518183	875492	ST11	ST11	Jordan	Peru	21
662360	875492	ST11	ST11	Uganda	Peru	199
893166	875492	ST11	ST11	Uganda	Peru	22
21780	875492	ST11	ST11	Peru	Peru	257
876278	875492	ST11	ST11	Peru	Peru	232
876294	875492	ST11	ST11	Peru	Peru	234
876816	875492	ST11	ST11	Peru	Peru	9
875812	875492	ST11	ST11	Peru	Peru	8
875580	875492	ST11	ST11	Peru	Peru	2
876324	875492	ST11	ST11	Peru	Peru	41
876332	875492	ST11	ST11	Peru	Peru	229
875506	875492	ST11	ST11	Peru	Peru	3
976285	875492	ST11	ST11	Thailand	Peru	26
518624	875492	ST11	ST11	Jordan	Peru	26
514974	875492	ST11	ST11	Jordan	Peru	21
803756	875492	ST11	ST11	Georgia	Peru	211
876286	875492	ST11	ST11	Peru	Peru	233
875984	875492	ST11	ST11	Peru	Peru	200
876042	875492	ST11	ST11	Peru	Peru	232
876308	875492	ST11	ST11	Peru	Peru	233
876156	875492	ST11	ST11	Peru	Peru	231
876904	875492	ST11	ST11	Peru	Peru	196
877062	875492	ST11	ST11	Peru	Peru	203
367941	875492	ST11	ST11	Kenya	Peru	192
367987	875492	ST11	ST11	Kenya	Peru	21
876446	875492	ST11	ST11	Peru	Peru	202
876778	875492	ST11	ST11	Peru	Peru	34
367950	875492	ST11	ST11	Kenya	Peru	398
367969	875492	ST11	ST11	Kenya	Peru	398
367932	875492	ST11	ST11	Kenya	Peru	192
21777	875128	ST11	ST11	Peru	Peru	21
22261	875128	ST11	ST11	Peru	Peru	19
791887	875128	ST11	ST11	Thailand	Peru	259
22269	875128	ST11	ST11	Peru	Peru	23
875678	875128	ST11	ST11	Peru	Peru	254
22260	875128	ST11	ST11	Peru	Peru	31
582081	875128	ST11	ST11	Thailand	Peru	288
582559	875128	ST11	ST11	Thailand	Peru	261
976979	875128	ST11	ST11	Thailand	Peru	263
21779	875128	ST11	ST11	Peru	Peru	18
22271	875128	ST11	ST11	Peru	Peru	268
876500	875128	ST11	ST11	Peru	Peru	214
876518	875128	ST11	ST11	Peru	Peru	214
580940	875128	ST11	ST11	Thailand	Peru	260
974971	875128	ST11	ST11	Thailand	Peru	266
515575	875128	ST11	ST11	Jordan	Peru	263
22270	875128	ST11	ST11	Peru	Peru	269
875598	875128	ST11	ST11	Peru	Peru	261
875320	875128	ST11	ST11	Peru	Peru	264
875136	875128	ST11	ST11	Peru	Peru	255
875492	875128	ST11	ST11	Peru	Peru	264
876988	875128	ST11	ST11	Peru	Peru	267
22245	875128	ST11	ST11	Peru	Peru	260
22246	875128	ST11	ST11	Peru	Peru	261
689006	875128	ST11	ST11	Thailand	Peru	265
689354	875128	ST11	ST11	Thailand	Peru	265
975071	875128	ST11	ST11	Thailand	Peru	266
514929	875128	ST11	ST11	Jordan	Peru	260
518156	875128	ST11	ST11	Jordan	Peru	259
518633	875128	ST11	ST11	Jordan	Peru	266
518183	875128	ST11	ST11	Jordan	Peru	261
662360	875128	ST11	ST11	Uganda	Peru	209
893166	875128	ST11	ST11	Uganda	Peru	261
21780	875128	ST11	ST11	Peru	Peru	19
876278	875128	ST11	ST11	Peru	Peru	218
876294	875128	ST11	ST11	Peru	Peru	219
876816	875128	ST11	ST11	Peru	Peru	264
875812	875128	ST11	ST11	Peru	Peru	265
875580	875128	ST11	ST11	Peru	Peru	264
876324	875128	ST11	ST11	Peru	Peru	264
876332	875128	ST11	ST11	Peru	Peru	215
875506	875128	ST11	ST11	Peru	Peru	260
976285	875128	ST11	ST11	Thailand	Peru	263
518624	875128	ST11	ST11	Jordan	Peru	266
514974	875128	ST11	ST11	Jordan	Peru	261
803756	875128	ST11	ST11	Georgia	Peru	259
876286	875128	ST11	ST11	Peru	Peru	218
875984	875128	ST11	ST11	Peru	Peru	266
876042	875128	ST11	ST11	Peru	Peru	217
876308	875128	ST11	ST11	Peru	Peru	218
876156	875128	ST11	ST11	Peru	Peru	216
876904	875128	ST11	ST11	Peru	Peru	217
877062	875128	ST11	ST11	Peru	Peru	267
367941	875128	ST11	ST11	Kenya	Peru	211
367987	875128	ST11	ST11	Kenya	Peru	257
876446	875128	ST11	ST11	Peru	Peru	221
876778	875128	ST11	ST11	Peru	Peru	256
367950	875128	ST11	ST11	Kenya	Peru	447
367969	875128	ST11	ST11	Kenya	Peru	448
367932	875128	ST11	ST11	Kenya	Peru	211
21777	876988	ST11	ST11	Peru	Peru	263
22261	876988	ST11	ST11	Peru	Peru	259
791887	876988	ST11	ST11	Thailand	Peru	46
22269	876988	ST11	ST11	Peru	Peru	263
875678	876988	ST11	ST11	Peru	Peru	34
22260	876988	ST11	ST11	Peru	Peru	273
582081	876988	ST11	ST11	Thailand	Peru	78
582559	876988	ST11	ST11	Thailand	Peru	47
976979	876988	ST11	ST11	Thailand	Peru	53
21779	876988	ST11	ST11	Peru	Peru	259
22271	876988	ST11	ST11	Peru	Peru	217
876500	876988	ST11	ST11	Peru	Peru	236
876518	876988	ST11	ST11	Peru	Peru	235
580940	876988	ST11	ST11	Thailand	Peru	46
974971	876988	ST11	ST11	Thailand	Peru	55
515575	876988	ST11	ST11	Jordan	Peru	49
22270	876988	ST11	ST11	Peru	Peru	217
875598	876988	ST11	ST11	Peru	Peru	35
875320	876988	ST11	ST11	Peru	Peru	37
875136	876988	ST11	ST11	Peru	Peru	58
875492	876988	ST11	ST11	Peru	Peru	37
875128	876988	ST11	ST11	Peru	Peru	267
22245	876988	ST11	ST11	Peru	Peru	36
22246	876988	ST11	ST11	Peru	Peru	36
689006	876988	ST11	ST11	Thailand	Peru	53
689354	876988	ST11	ST11	Thailand	Peru	53
975071	876988	ST11	ST11	Thailand	Peru	55
514929	876988	ST11	ST11	Jordan	Peru	46
518156	876988	ST11	ST11	Jordan	Peru	46
518633	876988	ST11	ST11	Jordan	Peru	51
518183	876988	ST11	ST11	Jordan	Peru	46
662360	876988	ST11	ST11	Uganda	Peru	202
893166	876988	ST11	ST11	Uganda	Peru	47
21780	876988	ST11	ST11	Peru	Peru	260
876278	876988	ST11	ST11	Peru	Peru	238
876294	876988	ST11	ST11	Peru	Peru	240
876816	876988	ST11	ST11	Peru	Peru	38
875812	876988	ST11	ST11	Peru	Peru	39
875580	876988	ST11	ST11	Peru	Peru	36
876324	876988	ST11	ST11	Peru	Peru	66
876332	876988	ST11	ST11	Peru	Peru	235
875506	876988	ST11	ST11	Peru	Peru	34
976285	876988	ST11	ST11	Thailand	Peru	51
518624	876988	ST11	ST11	Jordan	Peru	51
514974	876988	ST11	ST11	Jordan	Peru	46
803756	876988	ST11	ST11	Georgia	Peru	214
876286	876988	ST11	ST11	Peru	Peru	239
875984	876988	ST11	ST11	Peru	Peru	205
876042	876988	ST11	ST11	Peru	Peru	238
876308	876988	ST11	ST11	Peru	Peru	239
876156	876988	ST11	ST11	Peru	Peru	237
876904	876988	ST11	ST11	Peru	Peru	203
877062	876988	ST11	ST11	Peru	Peru	190
367941	876988	ST11	ST11	Kenya	Peru	198
367987	876988	ST11	ST11	Kenya	Peru	46
876446	876988	ST11	ST11	Peru	Peru	208
876778	876988	ST11	ST11	Peru	Peru	59
367950	876988	ST11	ST11	Kenya	Peru	402
367969	876988	ST11	ST11	Kenya	Peru	402
367932	876988	ST11	ST11	Kenya	Peru	198
21777	22245	ST11	ST11	Peru	Peru	256
22261	22245	ST11	ST11	Peru	Peru	252
791887	22245	ST11	ST11	Thailand	Peru	18
22269	22245	ST11	ST11	Peru	Peru	256
875678	22245	ST11	ST11	Peru	Peru	6
22260	22245	ST11	ST11	Peru	Peru	266
582081	22245	ST11	ST11	Thailand	Peru	50
582559	22245	ST11	ST11	Thailand	Peru	19
976979	22245	ST11	ST11	Thailand	Peru	24
21779	22245	ST11	ST11	Peru	Peru	252
22271	22245	ST11	ST11	Peru	Peru	213
876500	22245	ST11	ST11	Peru	Peru	228
876518	22245	ST11	ST11	Peru	Peru	227
580940	22245	ST11	ST11	Thailand	Peru	18
974971	22245	ST11	ST11	Thailand	Peru	27
515575	22245	ST11	ST11	Jordan	Peru	21
22270	22245	ST11	ST11	Peru	Peru	213
875598	22245	ST11	ST11	Peru	Peru	9
875320	22245	ST11	ST11	Peru	Peru	11
875136	22245	ST11	ST11	Peru	Peru	29
875492	22245	ST11	ST11	Peru	Peru	11
875128	22245	ST11	ST11	Peru	Peru	260
876988	22245	ST11	ST11	Peru	Peru	36
22246	22245	ST11	ST11	Peru	Peru	0
689006	22245	ST11	ST11	Thailand	Peru	24
689354	22245	ST11	ST11	Thailand	Peru	24
975071	22245	ST11	ST11	Thailand	Peru	27
514929	22245	ST11	ST11	Jordan	Peru	19
518156	22245	ST11	ST11	Jordan	Peru	18
518633	22245	ST11	ST11	Jordan	Peru	23
518183	22245	ST11	ST11	Jordan	Peru	18
662360	22245	ST11	ST11	Uganda	Peru	195
893166	22245	ST11	ST11	Uganda	Peru	19
21780	22245	ST11	ST11	Peru	Peru	253
876278	22245	ST11	ST11	Peru	Peru	229
876294	22245	ST11	ST11	Peru	Peru	231
876816	22245	ST11	ST11	Peru	Peru	12
875812	22245	ST11	ST11	Peru	Peru	13
875580	22245	ST11	ST11	Peru	Peru	11
876324	22245	ST11	ST11	Peru	Peru	38
876332	22245	ST11	ST11	Peru	Peru	227
875506	22245	ST11	ST11	Peru	Peru	8
976285	22245	ST11	ST11	Thailand	Peru	23
518624	22245	ST11	ST11	Jordan	Peru	23
514974	22245	ST11	ST11	Jordan	Peru	18
803756	22245	ST11	ST11	Georgia	Peru	207
876286	22245	ST11	ST11	Peru	Peru	230
875984	22245	ST11	ST11	Peru	Peru	197
876042	22245	ST11	ST11	Peru	Peru	229
876308	22245	ST11	ST11	Peru	Peru	230
876156	22245	ST11	ST11	Peru	Peru	229
876904	22245	ST11	ST11	Peru	Peru	193
877062	22245	ST11	ST11	Peru	Peru	200
367941	22245	ST11	ST11	Kenya	Peru	188
367987	22245	ST11	ST11	Kenya	Peru	18
876446	22245	ST11	ST11	Peru	Peru	199
876778	22245	ST11	ST11	Peru	Peru	31
367950	22245	ST11	ST11	Kenya	Peru	390
367969	22245	ST11	ST11	Kenya	Peru	390
367932	22245	ST11	ST11	Kenya	Peru	188
21777	22246	ST11	ST11	Peru	Peru	257
22261	22246	ST11	ST11	Peru	Peru	253
791887	22246	ST11	ST11	Thailand	Peru	18
22269	22246	ST11	ST11	Peru	Peru	257
875678	22246	ST11	ST11	Peru	Peru	6
22260	22246	ST11	ST11	Peru	Peru	267
582081	22246	ST11	ST11	Thailand	Peru	49
582559	22246	ST11	ST11	Thailand	Peru	19
976979	22246	ST11	ST11	Thailand	Peru	24
21779	22246	ST11	ST11	Peru	Peru	253
22271	22246	ST11	ST11	Peru	Peru	213
876500	22246	ST11	ST11	Peru	Peru	229
876518	22246	ST11	ST11	Peru	Peru	228
580940	22246	ST11	ST11	Thailand	Peru	18
974971	22246	ST11	ST11	Thailand	Peru	27
515575	22246	ST11	ST11	Jordan	Peru	21
22270	22246	ST11	ST11	Peru	Peru	213
875598	22246	ST11	ST11	Peru	Peru	9
875320	22246	ST11	ST11	Peru	Peru	11
875136	22246	ST11	ST11	Peru	Peru	29
875492	22246	ST11	ST11	Peru	Peru	11
875128	22246	ST11	ST11	Peru	Peru	261
876988	22246	ST11	ST11	Peru	Peru	36
22245	22246	ST11	ST11	Peru	Peru	0
689006	22246	ST11	ST11	Thailand	Peru	24
689354	22246	ST11	ST11	Thailand	Peru	24
975071	22246	ST11	ST11	Thailand	Peru	27
514929	22246	ST11	ST11	Jordan	Peru	19
518156	22246	ST11	ST11	Jordan	Peru	18
518633	22246	ST11	ST11	Jordan	Peru	23
518183	22246	ST11	ST11	Jordan	Peru	18
662360	22246	ST11	ST11	Uganda	Peru	196
893166	22246	ST11	ST11	Uganda	Peru	19
21780	22246	ST11	ST11	Peru	Peru	254
876278	22246	ST11	ST11	Peru	Peru	230
876294	22246	ST11	ST11	Peru	Peru	232
876816	22246	ST11	ST11	Peru	Peru	12
875812	22246	ST11	ST11	Peru	Peru	13
875580	22246	ST11	ST11	Peru	Peru	11
876324	22246	ST11	ST11	Peru	Peru	38
876332	22246	ST11	ST11	Peru	Peru	228
875506	22246	ST11	ST11	Peru	Peru	8
976285	22246	ST11	ST11	Thailand	Peru	23
518624	22246	ST11	ST11	Jordan	Peru	23
514974	22246	ST11	ST11	Jordan	Peru	18
803756	22246	ST11	ST11	Georgia	Peru	208
876286	22246	ST11	ST11	Peru	Peru	231
875984	22246	ST11	ST11	Peru	Peru	197
876042	22246	ST11	ST11	Peru	Peru	230
876308	22246	ST11	ST11	Peru	Peru	231
876156	22246	ST11	ST11	Peru	Peru	230
876904	22246	ST11	ST11	Peru	Peru	194
877062	22246	ST11	ST11	Peru	Peru	200
367941	22246	ST11	ST11	Kenya	Peru	189
367987	22246	ST11	ST11	Kenya	Peru	18
876446	22246	ST11	ST11	Peru	Peru	200
876778	22246	ST11	ST11	Peru	Peru	31
367950	22246	ST11	ST11	Kenya	Peru	392
367969	22246	ST11	ST11	Kenya	Peru	392
367932	22246	ST11	ST11	Kenya	Peru	189
21777	689006	ST11	ST11	Peru	Thailand	261
22261	689006	ST11	ST11	Peru	Thailand	256
791887	689006	ST11	ST11	Thailand	Thailand	25
22269	689006	ST11	ST11	Peru	Thailand	262
875678	689006	ST11	ST11	Peru	Thailand	23
22260	689006	ST11	ST11	Peru	Thailand	271
582081	689006	ST11	ST11	Thailand	Thailand	53
582559	689006	ST11	ST11	Thailand	Thailand	26
976979	689006	ST11	ST11	Thailand	Thailand	4
21779	689006	ST11	ST11	Peru	Thailand	257
22271	689006	ST11	ST11	Peru	Thailand	218
876500	689006	ST11	ST11	Peru	Thailand	236
876518	689006	ST11	ST11	Peru	Thailand	235
580940	689006	ST11	ST11	Thailand	Thailand	25
974971	689006	ST11	ST11	Thailand	Thailand	29
515575	689006	ST11	ST11	Jordan	Thailand	28
22270	689006	ST11	ST11	Peru	Thailand	218
875598	689006	ST11	ST11	Peru	Thailand	26
875320	689006	ST11	ST11	Peru	Thailand	28
875136	689006	ST11	ST11	Peru	Thailand	38
875492	689006	ST11	ST11	Peru	Thailand	28
875128	689006	ST11	ST11	Peru	Thailand	265
876988	689006	ST11	ST11	Peru	Thailand	53
22245	689006	ST11	ST11	Peru	Thailand	24
22246	689006	ST11	ST11	Peru	Thailand	24
689354	689006	ST11	ST11	Thailand	Thailand	2
975071	689006	ST11	ST11	Thailand	Thailand	29
514929	689006	ST11	ST11	Jordan	Thailand	26
518156	689006	ST11	ST11	Jordan	Thailand	25
518633	689006	ST11	ST11	Jordan	Thailand	30
518183	689006	ST11	ST11	Jordan	Thailand	25
662360	689006	ST11	ST11	Uganda	Thailand	201
893166	689006	ST11	ST11	Uganda	Thailand	26
21780	689006	ST11	ST11	Peru	Thailand	258
876278	689006	ST11	ST11	Peru	Thailand	238
876294	689006	ST11	ST11	Peru	Thailand	240
876816	689006	ST11	ST11	Peru	Thailand	29
875812	689006	ST11	ST11	Peru	Thailand	30
875580	689006	ST11	ST11	Peru	Thailand	28
876324	689006	ST11	ST11	Peru	Thailand	46
876332	689006	ST11	ST11	Peru	Thailand	235
875506	689006	ST11	ST11	Peru	Thailand	25
976285	689006	ST11	ST11	Thailand	Thailand	25
518624	689006	ST11	ST11	Jordan	Thailand	30
514974	689006	ST11	ST11	Jordan	Thailand	25
803756	689006	ST11	ST11	Georgia	Thailand	214
876286	689006	ST11	ST11	Peru	Thailand	239
875984	689006	ST11	ST11	Peru	Thailand	205
876042	689006	ST11	ST11	Peru	Thailand	238
876308	689006	ST11	ST11	Peru	Thailand	239
876156	689006	ST11	ST11	Peru	Thailand	237
876904	689006	ST11	ST11	Peru	Thailand	201
877062	689006	ST11	ST11	Peru	Thailand	207
367941	689006	ST11	ST11	Kenya	Thailand	196
367987	689006	ST11	ST11	Kenya	Thailand	25
876446	689006	ST11	ST11	Peru	Thailand	207
876778	689006	ST11	ST11	Peru	Thailand	40
367950	689006	ST11	ST11	Kenya	Thailand	401
367969	689006	ST11	ST11	Kenya	Thailand	401
367932	689006	ST11	ST11	Kenya	Thailand	196
21777	689354	ST11	ST11	Peru	Thailand	261
22261	689354	ST11	ST11	Peru	Thailand	256
791887	689354	ST11	ST11	Thailand	Thailand	25
22269	689354	ST11	ST11	Peru	Thailand	262
875678	689354	ST11	ST11	Peru	Thailand	23
22260	689354	ST11	ST11	Peru	Thailand	271
582081	689354	ST11	ST11	Thailand	Thailand	53
582559	689354	ST11	ST11	Thailand	Thailand	26
976979	689354	ST11	ST11	Thailand	Thailand	4
21779	689354	ST11	ST11	Peru	Thailand	257
22271	689354	ST11	ST11	Peru	Thailand	218
876500	689354	ST11	ST11	Peru	Thailand	236
876518	689354	ST11	ST11	Peru	Thailand	235
580940	689354	ST11	ST11	Thailand	Thailand	25
974971	689354	ST11	ST11	Thailand	Thailand	29
515575	689354	ST11	ST11	Jordan	Thailand	28
22270	689354	ST11	ST11	Peru	Thailand	218
875598	689354	ST11	ST11	Peru	Thailand	26
875320	689354	ST11	ST11	Peru	Thailand	28
875136	689354	ST11	ST11	Peru	Thailand	38
875492	689354	ST11	ST11	Peru	Thailand	28
875128	689354	ST11	ST11	Peru	Thailand	265
876988	689354	ST11	ST11	Peru	Thailand	53
22245	689354	ST11	ST11	Peru	Thailand	24
22246	689354	ST11	ST11	Peru	Thailand	24
689006	689354	ST11	ST11	Thailand	Thailand	2
975071	689354	ST11	ST11	Thailand	Thailand	29
514929	689354	ST11	ST11	Jordan	Thailand	26
518156	689354	ST11	ST11	Jordan	Thailand	25
518633	689354	ST11	ST11	Jordan	Thailand	30
518183	689354	ST11	ST11	Jordan	Thailand	25
662360	689354	ST11	ST11	Uganda	Thailand	201
893166	689354	ST11	ST11	Uganda	Thailand	26
21780	689354	ST11	ST11	Peru	Thailand	258
876278	689354	ST11	ST11	Peru	Thailand	238
876294	689354	ST11	ST11	Peru	Thailand	240
876816	689354	ST11	ST11	Peru	Thailand	29
875812	689354	ST11	ST11	Peru	Thailand	30
875580	689354	ST11	ST11	Peru	Thailand	28
876324	689354	ST11	ST11	Peru	Thailand	46
876332	689354	ST11	ST11	Peru	Thailand	235
875506	689354	ST11	ST11	Peru	Thailand	25
976285	689354	ST11	ST11	Thailand	Thailand	25
518624	689354	ST11	ST11	Jordan	Thailand	30
514974	689354	ST11	ST11	Jordan	Thailand	25
803756	689354	ST11	ST11	Georgia	Thailand	214
876286	689354	ST11	ST11	Peru	Thailand	239
875984	689354	ST11	ST11	Peru	Thailand	205
876042	689354	ST11	ST11	Peru	Thailand	238
876308	689354	ST11	ST11	Peru	Thailand	239
876156	689354	ST11	ST11	Peru	Thailand	237
876904	689354	ST11	ST11	Peru	Thailand	201
877062	689354	ST11	ST11	Peru	Thailand	207
367941	689354	ST11	ST11	Kenya	Thailand	196
367987	689354	ST11	ST11	Kenya	Thailand	25
876446	689354	ST11	ST11	Peru	Thailand	207
876778	689354	ST11	ST11	Peru	Thailand	40
367950	689354	ST11	ST11	Kenya	Thailand	400
367969	689354	ST11	ST11	Kenya	Thailand	400
367932	689354	ST11	ST11	Kenya	Thailand	196
21777	975071	ST11	ST11	Peru	Thailand	262
22261	975071	ST11	ST11	Peru	Thailand	257
791887	975071	ST11	ST11	Thailand	Thailand	27
22269	975071	ST11	ST11	Peru	Thailand	263
875678	975071	ST11	ST11	Peru	Thailand	25
22260	975071	ST11	ST11	Peru	Thailand	270
582081	975071	ST11	ST11	Thailand	Thailand	51
582559	975071	ST11	ST11	Thailand	Thailand	27
976979	975071	ST11	ST11	Thailand	Thailand	28
21779	975071	ST11	ST11	Peru	Thailand	256
22271	975071	ST11	ST11	Peru	Thailand	219
876500	975071	ST11	ST11	Peru	Thailand	236
876518	975071	ST11	ST11	Peru	Thailand	235
580940	975071	ST11	ST11	Thailand	Thailand	26
974971	975071	ST11	ST11	Thailand	Thailand	6
515575	975071	ST11	ST11	Jordan	Thailand	30
22270	975071	ST11	ST11	Peru	Thailand	220
875598	975071	ST11	ST11	Peru	Thailand	28
875320	975071	ST11	ST11	Peru	Thailand	29
875136	975071	ST11	ST11	Peru	Thailand	38
875492	975071	ST11	ST11	Peru	Thailand	30
875128	975071	ST11	ST11	Peru	Thailand	266
876988	975071	ST11	ST11	Peru	Thailand	55
22245	975071	ST11	ST11	Peru	Thailand	27
22246	975071	ST11	ST11	Peru	Thailand	27
689006	975071	ST11	ST11	Thailand	Thailand	29
689354	975071	ST11	ST11	Thailand	Thailand	29
514929	975071	ST11	ST11	Jordan	Thailand	28
518156	975071	ST11	ST11	Jordan	Thailand	27
518633	975071	ST11	ST11	Jordan	Thailand	32
518183	975071	ST11	ST11	Jordan	Thailand	27
662360	975071	ST11	ST11	Uganda	Thailand	203
893166	975071	ST11	ST11	Uganda	Thailand	28
21780	975071	ST11	ST11	Peru	Thailand	258
876278	975071	ST11	ST11	Peru	Thailand	239
876294	975071	ST11	ST11	Peru	Thailand	241
876816	975071	ST11	ST11	Peru	Thailand	31
875812	975071	ST11	ST11	Peru	Thailand	32
875580	975071	ST11	ST11	Peru	Thailand	30
876324	975071	ST11	ST11	Peru	Thailand	46
876332	975071	ST11	ST11	Peru	Thailand	236
875506	975071	ST11	ST11	Peru	Thailand	27
976285	975071	ST11	ST11	Thailand	Thailand	22
518624	975071	ST11	ST11	Jordan	Thailand	32
514974	975071	ST11	ST11	Jordan	Thailand	27
803756	975071	ST11	ST11	Georgia	Thailand	215
876286	975071	ST11	ST11	Peru	Thailand	240
875984	975071	ST11	ST11	Peru	Thailand	204
876042	975071	ST11	ST11	Peru	Thailand	239
876308	975071	ST11	ST11	Peru	Thailand	240
876156	975071	ST11	ST11	Peru	Thailand	238
876904	975071	ST11	ST11	Peru	Thailand	201
877062	975071	ST11	ST11	Peru	Thailand	207
367941	975071	ST11	ST11	Kenya	Thailand	197
367987	975071	ST11	ST11	Kenya	Thailand	27
876446	975071	ST11	ST11	Peru	Thailand	206
876778	975071	ST11	ST11	Peru	Thailand	41
367950	975071	ST11	ST11	Kenya	Thailand	398
367969	975071	ST11	ST11	Kenya	Thailand	400
367932	975071	ST11	ST11	Kenya	Thailand	197
21777	514929	ST11	ST11	Peru	Jordan	257
22261	514929	ST11	ST11	Peru	Jordan	253
791887	514929	ST11	ST11	Thailand	Jordan	18
22269	514929	ST11	ST11	Peru	Jordan	258
875678	514929	ST11	ST11	Peru	Jordan	17
22260	514929	ST11	ST11	Peru	Jordan	266
582081	514929	ST11	ST11	Thailand	Jordan	50
582559	514929	ST11	ST11	Thailand	Jordan	19
976979	514929	ST11	ST11	Thailand	Jordan	26
21779	514929	ST11	ST11	Peru	Jordan	252
22271	514929	ST11	ST11	Peru	Jordan	213
876500	514929	ST11	ST11	Peru	Jordan	228
876518	514929	ST11	ST11	Peru	Jordan	227
580940	514929	ST11	ST11	Thailand	Jordan	18
974971	514929	ST11	ST11	Thailand	Jordan	28
515575	514929	ST11	ST11	Jordan	Jordan	4
22270	514929	ST11	ST11	Peru	Jordan	213
875598	514929	ST11	ST11	Peru	Jordan	20
875320	514929	ST11	ST11	Peru	Jordan	22
875136	514929	ST11	ST11	Peru	Jordan	31
875492	514929	ST11	ST11	Peru	Jordan	22
875128	514929	ST11	ST11	Peru	Jordan	260
876988	514929	ST11	ST11	Peru	Jordan	46
22245	514929	ST11	ST11	Peru	Jordan	19
22246	514929	ST11	ST11	Peru	Jordan	19
689006	514929	ST11	ST11	Thailand	Jordan	26
689354	514929	ST11	ST11	Thailand	Jordan	26
975071	514929	ST11	ST11	Thailand	Jordan	28
518156	514929	ST11	ST11	Jordan	Jordan	1
518633	514929	ST11	ST11	Jordan	Jordan	6
518183	514929	ST11	ST11	Jordan	Jordan	1
662360	514929	ST11	ST11	Uganda	Jordan	195
893166	514929	ST11	ST11	Uganda	Jordan	18
21780	514929	ST11	ST11	Peru	Jordan	253
876278	514929	ST11	ST11	Peru	Jordan	230
876294	514929	ST11	ST11	Peru	Jordan	232
876816	514929	ST11	ST11	Peru	Jordan	23
875812	514929	ST11	ST11	Peru	Jordan	24
875580	514929	ST11	ST11	Peru	Jordan	22
876324	514929	ST11	ST11	Peru	Jordan	39
876332	514929	ST11	ST11	Peru	Jordan	227
875506	514929	ST11	ST11	Peru	Jordan	19
976285	514929	ST11	ST11	Thailand	Jordan	24
518624	514929	ST11	ST11	Jordan	Jordan	6
514974	514929	ST11	ST11	Jordan	Jordan	1
803756	514929	ST11	ST11	Georgia	Jordan	207
876286	514929	ST11	ST11	Peru	Jordan	231
875984	514929	ST11	ST11	Peru	Jordan	197
876042	514929	ST11	ST11	Peru	Jordan	230
876308	514929	ST11	ST11	Peru	Jordan	231
876156	514929	ST11	ST11	Peru	Jordan	229
876904	514929	ST11	ST11	Peru	Jordan	193
877062	514929	ST11	ST11	Peru	Jordan	198
367941	514929	ST11	ST11	Kenya	Jordan	188
367987	514929	ST11	ST11	Kenya	Jordan	19
876446	514929	ST11	ST11	Peru	Jordan	199
876778	514929	ST11	ST11	Peru	Jordan	33
367950	514929	ST11	ST11	Kenya	Jordan	392
367969	514929	ST11	ST11	Kenya	Jordan	392
367932	514929	ST11	ST11	Kenya	Jordan	188
21777	518156	ST11	ST11	Peru	Jordan	255
22261	518156	ST11	ST11	Peru	Jordan	251
791887	518156	ST11	ST11	Thailand	Jordan	17
22269	518156	ST11	ST11	Peru	Jordan	256
875678	518156	ST11	ST11	Peru	Jordan	16
22260	518156	ST11	ST11	Peru	Jordan	265
582081	518156	ST11	ST11	Thailand	Jordan	49
582559	518156	ST11	ST11	Thailand	Jordan	18
976979	518156	ST11	ST11	Thailand	Jordan	25
21779	518156	ST11	ST11	Peru	Jordan	252
22271	518156	ST11	ST11	Peru	Jordan	212
876500	518156	ST11	ST11	Peru	Jordan	227
876518	518156	ST11	ST11	Peru	Jordan	226
580940	518156	ST11	ST11	Thailand	Jordan	17
974971	518156	ST11	ST11	Thailand	Jordan	27
515575	518156	ST11	ST11	Jordan	Jordan	3
22270	518156	ST11	ST11	Peru	Jordan	212
875598	518156	ST11	ST11	Peru	Jordan	19
875320	518156	ST11	ST11	Peru	Jordan	21
875136	518156	ST11	ST11	Peru	Jordan	30
875492	518156	ST11	ST11	Peru	Jordan	21
875128	518156	ST11	ST11	Peru	Jordan	259
876988	518156	ST11	ST11	Peru	Jordan	46
22245	518156	ST11	ST11	Peru	Jordan	18
22246	518156	ST11	ST11	Peru	Jordan	18
689006	518156	ST11	ST11	Thailand	Jordan	25
689354	518156	ST11	ST11	Thailand	Jordan	25
975071	518156	ST11	ST11	Thailand	Jordan	27
514929	518156	ST11	ST11	Jordan	Jordan	1
518633	518156	ST11	ST11	Jordan	Jordan	5
518183	518156	ST11	ST11	Jordan	Jordan	0
662360	518156	ST11	ST11	Uganda	Jordan	194
893166	518156	ST11	ST11	Uganda	Jordan	17
21780	518156	ST11	ST11	Peru	Jordan	252
876278	518156	ST11	ST11	Peru	Jordan	230
876294	518156	ST11	ST11	Peru	Jordan	231
876816	518156	ST11	ST11	Peru	Jordan	22
875812	518156	ST11	ST11	Peru	Jordan	23
875580	518156	ST11	ST11	Peru	Jordan	21
876324	518156	ST11	ST11	Peru	Jordan	38
876332	518156	ST11	ST11	Peru	Jordan	227
875506	518156	ST11	ST11	Peru	Jordan	18
976285	518156	ST11	ST11	Thailand	Jordan	23
518624	518156	ST11	ST11	Jordan	Jordan	5
514974	518156	ST11	ST11	Jordan	Jordan	0
803756	518156	ST11	ST11	Georgia	Jordan	206
876286	518156	ST11	ST11	Peru	Jordan	230
875984	518156	ST11	ST11	Peru	Jordan	197
876042	518156	ST11	ST11	Peru	Jordan	229
876308	518156	ST11	ST11	Peru	Jordan	230
876156	518156	ST11	ST11	Peru	Jordan	228
876904	518156	ST11	ST11	Peru	Jordan	192
877062	518156	ST11	ST11	Peru	Jordan	198
367941	518156	ST11	ST11	Kenya	Jordan	187
367987	518156	ST11	ST11	Kenya	Jordan	18
876446	518156	ST11	ST11	Peru	Jordan	198
876778	518156	ST11	ST11	Peru	Jordan	32
367950	518156	ST11	ST11	Kenya	Jordan	392
367969	518156	ST11	ST11	Kenya	Jordan	392
367932	518156	ST11	ST11	Kenya	Jordan	187
21777	518633	ST11	ST11	Peru	Jordan	262
22261	518633	ST11	ST11	Peru	Jordan	258
791887	518633	ST11	ST11	Thailand	Jordan	22
22269	518633	ST11	ST11	Peru	Jordan	263
875678	518633	ST11	ST11	Peru	Jordan	21
22260	518633	ST11	ST11	Peru	Jordan	272
582081	518633	ST11	ST11	Thailand	Jordan	54
582559	518633	ST11	ST11	Thailand	Jordan	23
976979	518633	ST11	ST11	Thailand	Jordan	30
21779	518633	ST11	ST11	Peru	Jordan	258
22271	518633	ST11	ST11	Peru	Jordan	218
876500	518633	ST11	ST11	Peru	Jordan	234
876518	518633	ST11	ST11	Peru	Jordan	233
580940	518633	ST11	ST11	Thailand	Jordan	22
974971	518633	ST11	ST11	Thailand	Jordan	32
515575	518633	ST11	ST11	Jordan	Jordan	8
22270	518633	ST11	ST11	Peru	Jordan	218
875598	518633	ST11	ST11	Peru	Jordan	24
875320	518633	ST11	ST11	Peru	Jordan	26
875136	518633	ST11	ST11	Peru	Jordan	35
875492	518633	ST11	ST11	Peru	Jordan	26
875128	518633	ST11	ST11	Peru	Jordan	266
876988	518633	ST11	ST11	Peru	Jordan	51
22245	518633	ST11	ST11	Peru	Jordan	23
22246	518633	ST11	ST11	Peru	Jordan	23
689006	518633	ST11	ST11	Thailand	Jordan	30
689354	518633	ST11	ST11	Thailand	Jordan	30
975071	518633	ST11	ST11	Thailand	Jordan	32
514929	518633	ST11	ST11	Jordan	Jordan	6
518156	518633	ST11	ST11	Jordan	Jordan	5
518183	518633	ST11	ST11	Jordan	Jordan	5
662360	518633	ST11	ST11	Uganda	Jordan	201
893166	518633	ST11	ST11	Uganda	Jordan	22
21780	518633	ST11	ST11	Peru	Jordan	259
876278	518633	ST11	ST11	Peru	Jordan	236
876294	518633	ST11	ST11	Peru	Jordan	238
876816	518633	ST11	ST11	Peru	Jordan	27
875812	518633	ST11	ST11	Peru	Jordan	27
875580	518633	ST11	ST11	Peru	Jordan	26
876324	518633	ST11	ST11	Peru	Jordan	43
876332	518633	ST11	ST11	Peru	Jordan	233
875506	518633	ST11	ST11	Peru	Jordan	23
976285	518633	ST11	ST11	Thailand	Jordan	28
518624	518633	ST11	ST11	Jordan	Jordan	0
514974	518633	ST11	ST11	Jordan	Jordan	5
803756	518633	ST11	ST11	Georgia	Jordan	213
876286	518633	ST11	ST11	Peru	Jordan	237
875984	518633	ST11	ST11	Peru	Jordan	202
876042	518633	ST11	ST11	Peru	Jordan	236
876308	518633	ST11	ST11	Peru	Jordan	237
876156	518633	ST11	ST11	Peru	Jordan	235
876904	518633	ST11	ST11	Peru	Jordan	199
877062	518633	ST11	ST11	Peru	Jordan	204
367941	518633	ST11	ST11	Kenya	Jordan	194
367987	518633	ST11	ST11	Kenya	Jordan	23
876446	518633	ST11	ST11	Peru	Jordan	205
876778	518633	ST11	ST11	Peru	Jordan	37
367950	518633	ST11	ST11	Kenya	Jordan	399
367969	518633	ST11	ST11	Kenya	Jordan	399
367932	518633	ST11	ST11	Kenya	Jordan	194
21777	518183	ST11	ST11	Peru	Jordan	257
22261	518183	ST11	ST11	Peru	Jordan	253
791887	518183	ST11	ST11	Thailand	Jordan	17
22269	518183	ST11	ST11	Peru	Jordan	258
875678	518183	ST11	ST11	Peru	Jordan	16
22260	518183	ST11	ST11	Peru	Jordan	267
582081	518183	ST11	ST11	Thailand	Jordan	49
582559	518183	ST11	ST11	Thailand	Jordan	18
976979	518183	ST11	ST11	Thailand	Jordan	25
21779	518183	ST11	ST11	Peru	Jordan	253
22271	518183	ST11	ST11	Peru	Jordan	213
876500	518183	ST11	ST11	Peru	Jordan	229
876518	518183	ST11	ST11	Peru	Jordan	228
580940	518183	ST11	ST11	Thailand	Jordan	17
974971	518183	ST11	ST11	Thailand	Jordan	27
515575	518183	ST11	ST11	Jordan	Jordan	3
22270	518183	ST11	ST11	Peru	Jordan	213
875598	518183	ST11	ST11	Peru	Jordan	19
875320	518183	ST11	ST11	Peru	Jordan	21
875136	518183	ST11	ST11	Peru	Jordan	30
875492	518183	ST11	ST11	Peru	Jordan	21
875128	518183	ST11	ST11	Peru	Jordan	261
876988	518183	ST11	ST11	Peru	Jordan	46
22245	518183	ST11	ST11	Peru	Jordan	18
22246	518183	ST11	ST11	Peru	Jordan	18
689006	518183	ST11	ST11	Thailand	Jordan	25
689354	518183	ST11	ST11	Thailand	Jordan	25
975071	518183	ST11	ST11	Thailand	Jordan	27
514929	518183	ST11	ST11	Jordan	Jordan	1
518156	518183	ST11	ST11	Jordan	Jordan	0
518633	518183	ST11	ST11	Jordan	Jordan	5
662360	518183	ST11	ST11	Uganda	Jordan	196
893166	518183	ST11	ST11	Uganda	Jordan	17
21780	518183	ST11	ST11	Peru	Jordan	254
876278	518183	ST11	ST11	Peru	Jordan	231
876294	518183	ST11	ST11	Peru	Jordan	233
876816	518183	ST11	ST11	Peru	Jordan	22
875812	518183	ST11	ST11	Peru	Jordan	23
875580	518183	ST11	ST11	Peru	Jordan	21
876324	518183	ST11	ST11	Peru	Jordan	38
876332	518183	ST11	ST11	Peru	Jordan	228
875506	518183	ST11	ST11	Peru	Jordan	18
976285	518183	ST11	ST11	Thailand	Jordan	23
518624	518183	ST11	ST11	Jordan	Jordan	5
514974	518183	ST11	ST11	Jordan	Jordan	0
803756	518183	ST11	ST11	Georgia	Jordan	208
876286	518183	ST11	ST11	Peru	Jordan	232
875984	518183	ST11	ST11	Peru	Jordan	198
876042	518183	ST11	ST11	Peru	Jordan	231
876308	518183	ST11	ST11	Peru	Jordan	232
876156	518183	ST11	ST11	Peru	Jordan	230
876904	518183	ST11	ST11	Peru	Jordan	194
877062	518183	ST11	ST11	Peru	Jordan	199
367941	518183	ST11	ST11	Kenya	Jordan	188
367987	518183	ST11	ST11	Kenya	Jordan	18
876446	518183	ST11	ST11	Peru	Jordan	200
876778	518183	ST11	ST11	Peru	Jordan	32
367950	518183	ST11	ST11	Kenya	Jordan	394
367969	518183	ST11	ST11	Kenya	Jordan	394
367932	518183	ST11	ST11	Kenya	Jordan	188
21777	662360	ST11	ST11	Peru	Uganda	205
22261	662360	ST11	ST11	Peru	Uganda	201
791887	662360	ST11	ST11	Thailand	Uganda	194
22269	662360	ST11	ST11	Peru	Uganda	206
875678	662360	ST11	ST11	Peru	Uganda	189
22260	662360	ST11	ST11	Peru	Uganda	214
582081	662360	ST11	ST11	Thailand	Uganda	224
582559	662360	ST11	ST11	Thailand	Uganda	196
976979	662360	ST11	ST11	Thailand	Uganda	200
21779	662360	ST11	ST11	Peru	Uganda	202
22271	662360	ST11	ST11	Peru	Uganda	206
876500	662360	ST11	ST11	Peru	Uganda	135
876518	662360	ST11	ST11	Peru	Uganda	134
580940	662360	ST11	ST11	Thailand	Uganda	195
974971	662360	ST11	ST11	Thailand	Uganda	203
515575	662360	ST11	ST11	Jordan	Uganda	199
22270	662360	ST11	ST11	Peru	Uganda	205
875598	662360	ST11	ST11	Peru	Uganda	197
875320	662360	ST11	ST11	Peru	Uganda	198
875136	662360	ST11	ST11	Peru	Uganda	192
875492	662360	ST11	ST11	Peru	Uganda	199
875128	662360	ST11	ST11	Peru	Uganda	209
876988	662360	ST11	ST11	Peru	Uganda	202
22245	662360	ST11	ST11	Peru	Uganda	195
22246	662360	ST11	ST11	Peru	Uganda	196
689006	662360	ST11	ST11	Thailand	Uganda	201
689354	662360	ST11	ST11	Thailand	Uganda	201
975071	662360	ST11	ST11	Thailand	Uganda	203
514929	662360	ST11	ST11	Jordan	Uganda	195
518156	662360	ST11	ST11	Jordan	Uganda	194
518633	662360	ST11	ST11	Jordan	Uganda	201
518183	662360	ST11	ST11	Jordan	Uganda	196
893166	662360	ST11	ST11	Uganda	Uganda	197
21780	662360	ST11	ST11	Peru	Uganda	203
876278	662360	ST11	ST11	Peru	Uganda	138
876294	662360	ST11	ST11	Peru	Uganda	139
876816	662360	ST11	ST11	Peru	Uganda	200
875812	662360	ST11	ST11	Peru	Uganda	200
875580	662360	ST11	ST11	Peru	Uganda	199
876324	662360	ST11	ST11	Peru	Uganda	199
876332	662360	ST11	ST11	Peru	Uganda	135
875506	662360	ST11	ST11	Peru	Uganda	196
976285	662360	ST11	ST11	Thailand	Uganda	200
518624	662360	ST11	ST11	Jordan	Uganda	201
514974	662360	ST11	ST11	Jordan	Uganda	196
803756	662360	ST11	ST11	Georgia	Uganda	195
876286	662360	ST11	ST11	Peru	Uganda	138
875984	662360	ST11	ST11	Peru	Uganda	196
876042	662360	ST11	ST11	Peru	Uganda	137
876308	662360	ST11	ST11	Peru	Uganda	138
876156	662360	ST11	ST11	Peru	Uganda	136
876904	662360	ST11	ST11	Peru	Uganda	85
877062	662360	ST11	ST11	Peru	Uganda	197
367941	662360	ST11	ST11	Kenya	Uganda	79
367987	662360	ST11	ST11	Kenya	Uganda	193
876446	662360	ST11	ST11	Peru	Uganda	91
876778	662360	ST11	ST11	Peru	Uganda	192
367950	662360	ST11	ST11	Kenya	Uganda	321
367969	662360	ST11	ST11	Kenya	Uganda	320
367932	662360	ST11	ST11	Kenya	Uganda	79
21777	893166	ST11	ST11	Peru	Uganda	257
22261	893166	ST11	ST11	Peru	Uganda	253
791887	893166	ST11	ST11	Thailand	Uganda	19
22269	893166	ST11	ST11	Peru	Uganda	258
875678	893166	ST11	ST11	Peru	Uganda	17
22260	893166	ST11	ST11	Peru	Uganda	267
582081	893166	ST11	ST11	Thailand	Uganda	51
582559	893166	ST11	ST11	Thailand	Uganda	19
976979	893166	ST11	ST11	Thailand	Uganda	26
21779	893166	ST11	ST11	Peru	Uganda	253
22271	893166	ST11	ST11	Peru	Uganda	214
876500	893166	ST11	ST11	Peru	Uganda	231
876518	893166	ST11	ST11	Peru	Uganda	230
580940	893166	ST11	ST11	Thailand	Uganda	18
974971	893166	ST11	ST11	Thailand	Uganda	28
515575	893166	ST11	ST11	Jordan	Uganda	20
22270	893166	ST11	ST11	Peru	Uganda	214
875598	893166	ST11	ST11	Peru	Uganda	20
875320	893166	ST11	ST11	Peru	Uganda	22
[truncated: 105,589 more rows]
