# Supplementary material for: Preferred evolutionary routes of convergence in Klebsiella pneumoniae favor siderophore acquisition over hypervirulence
Source: Research Square preprint supplement (doi:10.21203/rs.3.rs-8613390/v1), 2026-02-13
Supplement: Supplementary file 6 [file fe9dd84e6c0a37b8b0bfcc1b.xlsx]

## Sheet: n=4,052
Contig_Name	tsne1D	tsne2D	Membership Probability	Plasmid Cluster	Location	ST	iucA	iroB	rmpA	rmpA2	peg344	CTX-M-1-like	CTX-M-25-like	CTX-M-2-like	CTX-M-8-like	CTX-M-9-like	KPC-Like	NDM-like	OXA-10-like	OXA-1-like	OXA-2-like	OXA-48-like	OXA-9-like	SHV-like	CTX-M-15-exact	CTX-M-14-exact	CTX-M-27-exact	KPC-2-exact	KPC-3-exact	KPC-27-exact	KPC-31-exact	KPC-33-exact	NDM-1-exact	OXA-1-exact	OXA-2-exact	OXA-48-exact	OXA-232-exact	OXA-9-exact	SHV-1-exact	SHV-2-exact	SHV-5-exact	SHV-7-exact	SHV-11-exact	SHV-12-exact	replicon1	replicon2	replicon3	replicon4	replicon5
1004755_p4	-61.351	-9.21286	0.960279	0	Georgia	15	.	.	.	.	.	.	.	.	.	.	.	.	.	.	.	.	.	.	.	.	.	.	.	.	.	.	.	.	.	.	.	.	.	.	.	.	.	.	.	.	.	.	.
517485_p5	-61.6569	-9.47555	0.922512	0	Jordan	1399	.	.	.	.	.	.	.	.	.	.	.	.	.	.	.	.	.	.	.	.	.	.	.	.	.	.	.	.	.	.	.	.	.	.	.	.	.	.	.	.	.	.	.
515432_p5	-61.6551	-9.46094	0.925841	0	Jordan	1399	.	.	.	.	.	.	.	.	.	.	.	.	.	.	.	.	.	.	.	.	.	.	.	.	.	.	.	.	.	.	.	.	.	.	.	.	.	.	.	.	.	.	.
OW970564.1	-60.9162	-10.0367	0.998982	0	n/a	147	.	.	.	.	.	.	.	.	.	.	.	.	.	.	.	.	.	.	.	.	.	.	.	.	.	.	.	.	.	.	.	.	.	.	.	.	.	.	.	.	.	.	.
OW970557.1	-60.9278	-10.0125	1	0	n/a	147	.	.	.	.	.	.	.	.	.	.	.	.	.	.	.	.	.	.	.	.	.	.	.	.	.	.	.	.	.	.	.	.	.	.	.	.	.	.	.	.	.	.	.
OW970544.1	-60.9229	-10.1199	1	0	n/a	147	.	.	.	.	.	.	.	.	.	.	.	.	.	.	.	.	.	.	.	.	.	.	.	.	.	.	.	.	.	.	.	.	.	.	.	.	.	.	.	.	.	.	.
OW970533.1	-60.9278	-10.0125	1	0	n/a	147	.	.	.	.	.	.	.	.	.	.	.	.	.	.	.	.	.	.	.	.	.	.	.	.	.	.	.	.	.	.	.	.	.	.	.	.	.	.	.	.	.	.	.
OW970516.1	-60.9263	-10.1153	1	0	n/a	147	.	.	.	.	.	.	.	.	.	.	.	.	.	.	.	.	.	.	.	.	.	.	.	.	.	.	.	.	.	.	.	.	.	.	.	.	.	.	.	.	.	.	.
OW970496.1	-60.6811	-10.5983	0.854584	0	n/a	147	.	.	.	.	.	.	.	.	.	.	.	.	.	.	.	.	.	.	.	.	.	.	.	.	.	.	.	.	.	.	.	.	.	.	.	.	.	.	.	.	.	.	.
OW970489.1	-60.9226	-10.1202	1	0	n/a	147	.	.	.	.	.	.	.	.	.	.	.	.	.	.	.	.	.	.	.	.	.	.	.	.	.	.	.	.	.	.	.	.	.	.	.	.	.	.	.	.	.	.	.
OW970480.1	-60.9263	-10.1153	1	0	n/a	147	.	.	.	.	.	.	.	.	.	.	.	.	.	.	.	.	.	.	.	.	.	.	.	.	.	.	.	.	.	.	.	.	.	.	.	.	.	.	.	.	.	.	.
OW970456.1	-60.9298	-10.0147	1	0	n/a	147	.	.	.	.	.	.	.	.	.	.	.	.	.	.	.	.	.	.	.	.	.	.	.	.	.	.	.	.	.	.	.	.	.	.	.	.	.	.	.	.	.	.	.
OW970440.1	-60.9307	-10.0193	1	0	n/a	147	.	.	.	.	.	.	.	.	.	.	.	.	.	.	.	.	.	.	.	.	.	.	.	.	.	.	.	.	.	.	.	.	.	.	.	.	.	.	.	.	.	.	.
OW970425.1	-60.6548	-10.6695	0.825202	0	n/a	147	.	.	.	.	.	.	.	.	.	.	.	.	.	.	.	.	.	.	.	.	.	.	.	.	.	.	.	.	.	.	.	.	.	.	.	.	.	.	.	.	.	.	.
OW970417.1	-60.6835	-10.5981	0.853195	0	n/a	147	.	.	.	.	.	.	.	.	.	.	.	.	.	.	.	.	.	.	.	.	.	.	.	.	.	.	.	.	.	.	.	.	.	.	.	.	.	.	.	.	.	.	.
OW970369.1	-60.3427	-8.54116	0.934366	0	n/a	147	.	.	.	.	.	.	.	.	.	.	.	.	.	.	.	.	.	.	.	.	.	.	.	.	.	.	.	.	.	.	.	.	.	.	.	.	.	.	.	.	.	.	.
OW970361.1	-60.9197	-10.0256	1	0	n/a	147	.	.	.	.	.	.	.	.	.	.	.	.	.	.	.	.	.	.	.	.	.	.	.	.	.	.	.	.	.	.	.	.	.	.	.	.	.	.	.	.	.	.	.
OW969815.1	-60.7938	-8.4317	0.853553	0	n/a	101	.	.	.	.	.	.	.	.	.	.	.	.	.	.	.	.	.	.	.	.	.	.	.	.	.	.	.	.	.	.	.	.	.	.	.	.	.	.	.	.	.	.	.
OW969808.1	-60.7959	-8.43716	0.858493	0	n/a	101	.	.	.	.	.	.	.	.	.	.	.	.	.	.	.	.	.	.	.	.	.	.	.	.	.	.	.	.	.	.	.	.	.	.	.	.	.	.	.	.	.	.	.
OW969776.1	-60.9183	-10.0184	0.998292	0	n/a	147	.	.	.	.	.	.	.	.	.	.	.	.	.	.	.	.	.	.	.	.	.	.	.	.	.	.	.	.	.	.	.	.	.	.	.	.	.	.	.	.	.	.	.
OW969744.1	-60.5627	-7.90954	0.595188	0	n/a	15	.	.	.	.	.	.	.	.	.	.	.	.	.	.	.	.	.	.	.	.	.	.	.	.	.	.	.	.	.	.	.	.	.	.	.	.	.	.	.	.	.	.	.
OW968321.1	-61.9469	-8.61665	0.709275	0	n/a	15	.	.	.	.	.	.	.	.	.	.	.	.	.	.	.	.	.	.	.	.	.	.	.	.	.	.	.	.	.	.	.	.	.	.	.	.	.	.	.	.	.	.	.
OW968257.1	-62.0936	-8.80044	0.777943	0	n/a	15	.	.	.	.	.	.	.	.	.	.	.	.	.	.	.	.	.	.	.	.	.	.	.	.	.	.	.	.	.	.	.	.	.	.	.	.	.	.	.	.	.	.	.
OW967818.1	-60.9278	-10.0125	1	0	n/a	147	.	.	.	.	.	.	.	.	.	.	.	.	.	.	.	.	.	.	.	.	.	.	.	.	.	.	.	.	.	.	.	.	.	.	.	.	.	.	.	.	.	.	.
OW959922.1	-61.9022	-8.43609	0.732025	0	n/a	101	.	.	.	.	.	.	.	.	.	.	.	.	.	.	.	.	.	.	.	.	.	.	.	.	.	.	.	.	.	.	.	.	.	.	.	.	.	.	.	.	.	.	.
OW959916.1	-62.0907	-8.80792	0.783831	0	n/a	392	.	.	.	.	.	.	.	.	.	.	.	.	.	.	.	.	.	.	.	.	.	.	.	.	.	.	.	.	.	.	.	.	.	.	.	.	.	.	.	.	.	.	.
OW959902.1	-61.9078	-8.43908	0.728347	0	n/a	307	.	.	.	.	.	.	.	.	.	.	.	.	.	.	.	.	.	.	.	.	.	.	.	.	.	.	.	.	.	.	.	.	.	.	.	.	.	.	.	.	.	.	.
OW849514.1	-61.6042	-9.58171	0.992666	0	n/a	15	.	.	.	.	.	.	.	.	.	.	.	.	.	.	.	.	.	.	.	.	.	.	.	.	.	.	.	.	.	.	.	.	.	.	.	.	.	.	.	.	.	.	.
OW848837.1	-62.0978	-8.80607	0.781623	0	n/a	15	.	.	.	.	.	.	.	.	.	.	.	.	.	.	.	.	.	.	.	.	.	.	.	.	.	.	.	.	.	.	.	.	.	.	.	.	.	.	.	.	.	.	.
OV408204.1	-62.3029	-8.6	0.654687	0	n/a	307	.	.	.	.	.	.	.	.	.	.	.	.	.	.	.	.	.	.	.	.	.	.	.	.	.	.	.	.	.	.	.	.	.	.	.	.	.	.	.	.	.	.	.
OV049816.1	-61.0161	-9.52894	1	0	n/a	147	.	.	.	.	.	.	.	.	.	.	.	.	.	.	.	.	.	.	.	.	.	.	.	.	.	.	.	.	.	.	.	.	.	.	.	.	.	.	.	.	.	.	.
LR890708.1	-61.6663	-10.7548	1	0	n/a	231	.	.	.	.	.	.	.	.	.	.	.	.	.	.	.	.	.	.	.	.	.	.	.	.	.	.	.	.	.	.	.	.	.	.	.	.	.	.	.	.	.	.	.
LR890638.1	-61.6663	-10.7548	1	0	n/a	231	.	.	.	.	.	.	.	.	.	.	.	.	.	.	.	.	.	.	.	.	.	.	.	.	.	.	.	.	.	.	.	.	.	.	.	.	.	.	.	.	.	.	.
LR890558.1	-60.7837	-9.38449	1	0	n/a	323	.	.	.	.	.	.	.	.	.	.	.	.	.	.	.	.	.	.	.	.	.	.	.	.	.	.	.	.	.	.	.	.	.	.	.	.	.	.	.	.	.	.	.
LR890532.1	-60.7881	-9.38145	1	0	n/a	323	.	.	.	.	.	.	.	.	.	.	.	.	.	.	.	.	.	.	.	.	.	.	.	.	.	.	.	.	.	.	.	.	.	.	.	.	.	.	.	.	.	.	.
LR890521.1	-61.5599	-10.5684	0.933652	0	n/a	231	.	.	.	.	.	.	.	.	.	.	.	.	.	.	.	.	.	.	.	.	.	.	.	.	.	.	.	.	.	.	.	.	.	.	.	.	.	.	.	.	.	.	.
LR890506.1	-61.5671	-10.5636	0.941142	0	n/a	231	.	.	.	.	.	.	.	.	.	.	.	.	.	.	.	.	.	.	.	.	.	.	.	.	.	.	.	.	.	.	.	.	.	.	.	.	.	.	.	.	.	.	.
LR890486.1	-60.7935	-9.38049	1	0	n/a	323	.	.	.	.	.	.	.	.	.	.	.	.	.	.	.	.	.	.	.	.	.	.	.	.	.	.	.	.	.	.	.	.	.	.	.	.	.	.	.	.	.	.	.
LR890432.1	-61.5602	-10.5768	0.925312	0	n/a	231	.	.	.	.	.	.	.	.	.	.	.	.	.	.	.	.	.	.	.	.	.	.	.	.	.	.	.	.	.	.	.	.	.	.	.	.	.	.	.	.	.	.	.
LR890390.1	-61.1698	-7.44225	0.650077	0	n/a	3092	.	.	.	.	.	.	.	.	.	.	.	.	.	.	.	.	.	.	.	.	.	.	.	.	.	.	.	.	.	.	.	.	.	.	.	.	.	.	.	.	.	.	.
LR890260.1	-61.5623	-10.5781	0.924765	0	n/a	231	.	.	.	.	.	.	.	.	.	.	.	.	.	.	.	.	.	.	.	.	.	.	.	.	.	.	.	.	.	.	.	.	.	.	.	.	.	.	.	.	.	.	.
LR025094.1	-60.6126	-9.28983	1	0	n/a	16	.	.	.	.	.	.	.	.	.	.	.	.	.	.	.	.	.	.	.	.	.	.	.	.	.	.	.	.	.	.	.	.	.	.	.	.	.	.	.	.	.	.	.
LR025090.1	-60.5882	-9.26995	1	0	n/a	16	.	.	.	.	.	.	.	.	.	.	.	.	.	.	.	.	.	.	.	.	.	.	.	.	.	.	.	.	.	.	.	.	.	.	.	.	.	.	.	.	.	.	.
LN824139.1	-60.1289	-7.85793	1	0	n/a	147	.	.	.	.	.	.	.	.	.	.	.	.	.	.	.	.	.	.	.	.	.	.	.	.	.	.	.	.	.	.	.	.	.	.	.	.	.	.	.	.	.	.	.
CP107465.1	-59.5176	-9.63406	1	0	n/a	11	.	.	.	.	.	.	.	.	.	.	.	.	.	.	.	.	.	.	.	.	.	.	.	.	.	.	.	.	.	.	.	.	.	.	.	.	.	.	.	.	.	.	.
CP107444.1	-59.5176	-9.63406	1	0	n/a	11	.	.	.	.	.	.	.	.	.	.	.	.	.	.	.	.	.	.	.	.	.	.	.	.	.	.	.	.	.	.	.	.	.	.	.	.	.	.	.	.	.	.	.
CP107429.1	-59.6948	-9.61937	0.726948	0	n/a	11	.	.	.	.	.	.	.	.	.	.	.	.	.	.	.	.	.	.	.	.	.	.	.	.	.	.	.	.	.	.	.	.	.	.	.	.	.	.	.	.	.	.	.
CP107405.1	-59.6914	-9.63034	0.72326	0	n/a	11	.	.	.	.	.	.	.	.	.	.	.	.	.	.	.	.	.	.	.	.	.	.	.	.	.	.	.	.	.	.	.	.	.	.	.	.	.	.	.	.	.	.	.
CP107317.1	-59.9623	-9.31996	0.971724	0	n/a	11	.	.	.	.	.	.	.	.	.	.	.	.	.	.	.	.	.	.	.	.	.	.	.	.	.	.	.	.	.	.	.	.	.	.	.	.	.	.	.	.	.	.	.
CP107305.1	-59.6915	-9.62702	0.723801	0	n/a	11	.	.	.	.	.	.	.	.	.	.	.	.	.	.	.	.	.	.	.	.	.	.	.	.	.	.	.	.	.	.	.	.	.	.	.	.	.	.	.	.	.	.	.
CP107300.1	-59.7659	-9.33338	1	0	n/a	11	.	.	.	.	.	.	.	.	.	.	.	.	.	.	.	.	.	.	.	.	.	.	.	.	.	.	.	.	.	.	.	.	.	.	.	.	.	.	.	.	.	.	.
CP107294.1	-59.9644	-9.32156	0.974312	0	n/a	11	.	.	.	.	.	.	.	.	.	.	.	.	.	.	.	.	.	.	.	.	.	.	.	.	.	.	.	.	.	.	.	.	.	.	.	.	.	.	.	.	.	.	.
CP106916.1	-60.0155	-9.92487	0.892267	0	n/a	11	.	.	.	.	.	.	.	.	.	.	.	.	.	.	.	.	.	.	.	.	.	.	.	.	.	.	.	.	.	.	.	.	.	.	.	.	.	.	.	.	.	.	.
CP102549.1	-62.1012	-9.06212	0.843877	0	n/a	16	.	.	.	.	.	.	.	.	.	.	.	.	.	.	.	.	.	.	.	.	.	.	.	.	.	.	.	.	.	.	.	.	.	.	.	.	.	.	.	.	.	.	.
CP101779.1	-60.0159	-9.92332	0.892497	0	n/a	11	.	.	.	.	.	.	.	.	.	.	.	.	.	.	.	.	.	.	.	.	.	.	.	.	.	.	.	.	.	.	.	.	.	.	.	.	.	.	.	.	.	.	.
CP100516.1	-61.8445	-9.75849	0.851289	0	n/a	2053	.	.	.	.	.	.	.	.	.	.	.	.	.	.	.	.	.	.	.	.	.	.	.	.	.	.	.	.	.	.	.	.	.	.	.	.	.	.	.	.	.	.	.
CP100512.1	-61.847	-9.74989	0.847145	0	n/a	2053	.	.	.	.	.	.	.	.	.	.	.	.	.	.	.	.	.	.	.	.	.	.	.	.	.	.	.	.	.	.	.	.	.	.	.	.	.	.	.	.	.	.	.
CP100123.1	-61.2724	-9.24411	0.961648	0	n/a	15	.	.	.	.	.	.	.	.	.	.	.	.	.	.	.	.	.	.	.	.	.	.	.	.	.	.	.	.	.	.	.	.	.	.	.	.	.	.	.	.	.	.	.
CP097706.1	-59.9767	-9.78293	0.894483	0	n/a	11	.	.	.	.	.	.	.	.	.	.	.	.	.	.	.	.	.	.	.	.	.	.	.	.	.	.	.	.	.	.	.	.	.	.	.	.	.	.	.	.	.	.	.
CP097676.1	-59.8823	-10.0071	1	0	n/a	11	.	.	.	.	.	.	.	.	.	.	.	.	.	.	.	.	.	.	.	.	.	.	.	.	.	.	.	.	.	.	.	.	.	.	.	.	.	.	.	.	.	.	.
CP095424.1	-60.0196	-9.90728	0.894338	0	n/a	11	.	.	.	.	.	.	.	.	.	.	.	.	.	.	.	.	.	.	.	.	.	.	.	.	.	.	.	.	.	.	.	.	.	.	.	.	.	.	.	.	.	.	.
CP091590.1	-63.019	-9.35952	0.592139	0	n/a	147	.	.	.	.	.	.	.	.	.	.	.	.	.	.	.	.	.	.	.	.	.	.	.	.	.	.	.	.	.	.	.	.	.	.	.	.	.	.	.	.	.	.	.
CP087648.1	-59.7397	-10.36	0.66607	0	n/a	11	.	.	.	.	.	.	.	.	.	.	.	.	.	.	.	.	.	.	.	.	.	.	.	.	.	.	.	.	.	.	.	.	.	.	.	.	.	.	.	.	.	.	.
CP083039.1	-62.9209	-8.14734	0.441683	0	n/a	101	.	.	.	.	.	.	.	.	.	.	.	.	.	.	.	.	.	.	.	.	.	.	.	.	.	.	.	.	.	.	.	.	.	.	.	.	.	.	.	.	.	.	.
CP082016.1	-59.6097	-9.28844	0.75028	0	n/a	11	.	.	.	.	.	.	.	.	.	.	.	.	.	.	.	.	.	.	.	.	.	.	.	.	.	.	.	.	.	.	.	.	.	.	.	.	.	.	.	.	.	.	.
CP077813.1	-61.8506	-9.75438	0.845132	0	n/a	5036	.	.	.	.	.	.	.	.	.	.	.	.	.	.	.	.	.	.	.	.	.	.	.	.	.	.	.	.	.	.	.	.	.	.	.	.	.	.	.	.	.	.	.
CP076867.1	-61.7022	-6.85163	0.43638	0	n/a	5236	.	.	.	.	.	.	.	.	.	.	.	.	.	.	.	.	.	.	.	.	.	.	.	.	.	.	.	.	.	.	.	.	.	.	.	.	.	.	.	.	.	.	.
CP076865.1	-63.3415	-10.4545	0.392192	0	n/a	5236	.	.	.	.	.	.	.	.	.	.	.	.	.	.	.	.	.	.	.	.	.	.	.	.	.	.	.	.	.	.	.	.	.	.	.	.	.	.	.	.	.	.	.
CP076864.1	-62.6615	-7.3145	0.39087	0	n/a	5236	.	.	.	.	.	.	.	.	.	.	.	.	.	.	.	.	.	.	.	.	.	.	.	.	.	.	.	.	.	.	.	.	.	.	.	.	.	.	.	.	.	.	.
CP076550.1	-63.0368	-10.571	0.456138	0	n/a	11	.	.	.	.	.	.	.	.	.	.	.	.	.	.	.	.	.	.	.	.	.	.	.	.	.	.	.	.	.	.	.	.	.	.	.	.	.	.	.	.	.	.	.
CP076011.1	-63.0688	-9.47164	0.572822	0	n/a	147	.	.	.	.	.	.	.	.	.	.	.	.	.	.	.	.	.	.	.	.	.	.	.	.	.	.	.	.	.	.	.	.	.	.	.	.	.	.	.	.	.	.	.
CP074117.1	-58.9638	-10.7063	0.464144	0	n/a	11	.	.	.	.	.	.	.	.	.	.	.	NDM-like	.	.	.	.	.	.	.	.	.	.	.	.	.	.	.	.	.	.	.	.	.	.	.	.	.	.	.	.	.	.	.
CP070600.1	-62.1241	-8.66419	0.718513	0	n/a	101	.	.	.	.	.	.	.	.	.	.	.	.	.	.	.	.	.	.	.	.	.	.	.	.	.	.	.	.	.	.	.	.	.	.	.	.	.	.	.	.	.	.	.
CP070567.1	-60.7163	-7.90415	0.623066	0	n/a	101	.	.	.	.	.	.	.	.	.	.	.	.	.	.	.	.	.	.	.	.	.	.	.	.	.	.	.	.	.	.	.	.	.	.	.	.	.	.	.	.	.	.	.
CP070529.1	-62.1327	-8.65683	0.7168	0	n/a	101	.	.	.	.	.	.	.	.	.	.	.	.	.	.	.	.	.	.	.	.	.	.	.	.	.	.	.	.	.	.	.	.	.	.	.	.	.	.	.	.	.	.	.
CP069205.1	-60.9254	-10.0128	1	0	n/a	147	.	.	.	.	.	.	.	.	.	.	.	.	.	.	.	.	.	.	.	.	.	.	.	.	.	.	.	.	.	.	.	.	.	.	.	.	.	.	.	.	.	.	.
CP067889.1	-60.4484	-8.45787	0.836401	0	n/a	307	.	.	.	.	.	.	.	.	.	.	.	.	.	.	.	.	.	.	.	.	.	.	.	.	.	.	.	.	.	.	.	.	.	.	.	.	.	.	.	.	.	.	.
CP067601.1	-59.141	-8.94671	1	0	n/a	258	.	.	.	.	.	.	.	.	.	.	.	.	.	.	.	.	.	.	.	.	.	.	.	.	.	.	.	.	.	.	.	.	.	.	.	.	.	.	.	.	.	.	.
CP067582.1	-63.6253	-10.1194	0.387214	0	n/a	15	.	.	.	.	.	.	.	.	.	.	.	.	.	.	.	.	.	.	.	.	.	.	.	.	.	.	.	.	.	.	.	.	.	.	.	.	.	.	.	.	.	.	.
CP067518.1	-61.5677	-7.82495	0.726189	0	n/a	15	.	.	.	.	.	.	.	.	.	.	.	.	.	.	.	.	.	.	.	.	.	.	.	.	.	.	.	.	.	.	.	.	.	.	.	.	.	.	.	.	.	.	.
CP067497.1	-59.2576	-8.90721	0.595954	0	n/a	258	.	.	.	.	.	.	.	.	.	.	.	.	.	.	.	.	.	.	.	.	.	.	.	.	.	.	.	.	.	.	.	.	.	.	.	.	.	.	.	.	.	.	.
CP066531.1	-60.0076	-9.31247	1	0	n/a	11	.	.	.	.	.	.	.	.	.	.	.	.	.	.	.	.	.	.	.	.	.	.	.	.	.	.	.	.	.	.	.	.	.	.	.	.	.	.	.	.	.	.	.
CP066520.1	-60.0117	-9.3156	1	0	n/a	11	.	.	.	.	.	.	.	.	.	.	.	.	.	.	.	.	.	.	.	.	.	.	.	.	.	.	.	.	.	.	.	.	.	.	.	.	.	.	.	.	.	.	.
CP064255.1	-60.02	-9.90678	0.894641	0	n/a	11	.	.	.	.	.	.	.	.	.	.	.	.	.	.	.	.	.	.	.	.	.	.	.	.	.	.	.	.	.	.	.	.	.	.	.	.	.	.	.	.	.	.	.
CP064249.1	-59.7375	-10.3575	0.665285	0	n/a	11	.	.	.	.	.	.	.	.	.	.	.	.	.	.	.	.	.	.	.	.	.	.	.	.	.	.	.	.	.	.	.	.	.	.	.	.	.	.	.	.	.	.	.
CP061971.1	-60.02	-9.91287	0.895305	0	n/a	1128	.	.	.	.	.	.	.	.	.	.	.	.	.	.	.	.	.	.	.	.	.	.	.	.	.	.	.	.	.	.	.	.	.	.	.	.	.	.	.	.	.	.	.
CP061959.1	-60.0224	-9.90398	0.896651	0	n/a	11	.	.	.	.	.	.	.	.	.	.	.	.	.	.	.	.	.	.	.	.	.	.	.	.	.	.	.	.	.	.	.	.	.	.	.	.	.	.	.	.	.	.	.
CP061066.1	-61.3986	-11.1909	1	0	n/a	147	.	.	.	.	.	.	.	.	.	.	.	.	.	.	.	.	.	.	.	.	.	.	.	.	.	.	.	.	.	.	.	.	.	.	.	.	.	.	.	.	.	.	.
CP061057.1	-61.297	-11.0981	0.57035	0	n/a	147	.	.	.	.	.	.	.	.	.	.	.	.	.	.	.	.	.	.	.	.	.	.	.	.	.	.	.	.	.	.	.	.	.	.	.	.	.	.	.	.	.	.	.
CP058944.1	-60.5377	-10.3022	0.890597	0	n/a	16	.	.	.	.	.	.	.	.	.	.	.	.	.	.	.	.	.	.	.	.	.	.	.	.	.	.	.	.	.	.	.	.	.	.	.	.	.	.	.	.	.	.	.
CP057317.1	-60.7847	-9.40952	1	0	n/a	966	.	.	.	.	.	.	.	.	.	.	.	.	.	.	.	.	.	.	.	.	.	.	.	.	.	.	.	.	.	.	.	.	.	.	.	.	.	.	.	.	.	.	.
CP056857.1	-60.3729	-7.82305	0.553611	0	n/a	34	.	.	.	.	.	.	.	.	.	.	.	.	.	.	.	.	.	.	.	.	.	.	.	.	.	.	.	.	.	.	.	.	.	.	.	.	.	.	.	.	.	.	.
CP052395.1	-61.1936	-7.4017	0.626522	0	n/a	4877	.	.	.	.	.	.	.	.	.	.	.	.	.	.	.	.	.	.	.	.	.	.	.	.	.	.	.	.	.	.	.	.	.	.	.	.	.	.	.	.	.	.	.
CP052354.1	-61.2351	-7.28519	1	0	n/a	4877	.	.	.	.	.	.	.	.	.	.	.	.	.	.	.	.	.	.	.	.	.	.	.	.	.	.	.	.	.	.	.	.	.	.	.	.	.	.	.	.	.	.	.
CP052339.1	-63.0691	-9.50435	0.565977	0	n/a	1838	.	.	.	.	.	.	.	.	.	.	.	.	.	.	.	.	.	.	.	.	.	.	.	.	.	.	.	.	.	.	.	.	.	.	.	.	.	.	.	.	.	.	.
CP052194.1	-59.7102	-8.42904	0.71368	0	n/a	101	.	.	.	.	.	.	.	.	.	.	.	.	.	.	.	.	.	.	.	.	.	.	.	.	.	.	.	.	.	.	.	.	.	.	.	.	.	.	.	.	.	.	.
CP050366.1	-60.9672	-9.68629	1	0	n/a	147	.	.	.	.	.	.	.	.	.	.	.	.	.	.	.	.	.	.	.	.	.	.	.	.	.	.	.	.	.	.	.	.	.	.	.	.	.	.	.	.	.	.	.
CP046964.1	-60.008	-9.32016	1	0	n/a	11	.	.	.	.	.	.	.	.	.	.	.	.	.	.	.	.	.	.	.	.	.	.	.	.	.	.	.	.	.	.	.	.	.	.	.	.	.	.	.	.	.	.	.
CP046888.1	-60.0091	-9.30924	1	0	n/a	11	.	.	.	.	.	.	.	.	.	.	.	.	.	.	.	.	.	.	.	.	.	.	.	.	.	.	.	.	.	.	.	.	.	.	.	.	.	.	.	.	.	.	.
CP045018.1	-61.1476	-7.52021	0.67079	0	n/a	16	.	.	.	.	.	.	.	.	.	.	.	.	.	.	.	.	.	.	.	.	.	.	.	.	.	.	.	.	.	.	.	.	.	.	.	.	.	.	.	.	.	.	.
CP041953.1	-60.9846	-9.65826	1	0	n/a	16	.	.	.	.	.	.	.	.	.	.	.	.	.	.	.	.	.	.	.	.	.	.	.	.	.	.	.	.	.	.	.	.	.	.	.	.	.	.	.	.	.	.	.
CP036444.1	-60.953	-8.61484	0.980796	0	n/a	45	.	.	.	.	.	.	.	.	.	.	.	.	.	.	.	.	.	.	.	.	.	.	.	.	.	.	.	.	.	.	.	.	.	.	.	.	.	.	.	.	.	.	.
CP036330.1	-62.2671	-7.97229	0.52477	0	n/a	231	.	.	.	.	.	.	.	.	.	.	.	.	.	.	.	.	.	.	.	.	.	.	.	.	.	.	.	.	.	.	.	.	.	.	.	.	.	.	.	.	.	.	.
CP034057.1	-61.9341	-9.82916	0.791679	0	n/a	15	.	.	.	.	.	.	.	.	.	.	.	.	.	.	.	.	.	.	.	.	.	.	.	.	.	.	.	.	.	.	.	.	.	.	.	.	.	.	.	.	.	.	.
CP034049.1	-61.9341	-9.82916	0.791679	0	n/a	15	.	.	.	.	.	.	.	.	.	.	.	.	.	.	.	.	.	.	.	.	.	.	.	.	.	.	.	.	.	.	.	.	.	.	.	.	.	.	.	.	.	.	.
CP033624.1	-60.701	-7.89521	0.614743	0	n/a	1685	.	.	.	.	.	.	.	.	.	.	.	.	.	.	.	.	.	.	.	.	.	.	.	.	.	.	.	.	.	.	.	.	.	.	.	.	.	.	.	.	.	.	.
CP032224.1	-63.0151	-9.35484	0.593672	0	n/a	147	.	.	.	.	.	.	.	.	.	.	.	.	.	.	.	.	.	.	.	.	.	.	.	.	.	.	.	.	.	.	.	.	.	.	.	.	.	.	.	.	.	.	.
CP032191.1	-61.4812	-10.1281	1	0	n/a	16	.	.	.	.	.	.	.	.	.	.	.	.	.	.	.	.	.	.	.	.	.	.	.	.	.	.	.	.	.	.	.	.	.	.	.	.	.	.	.	.	.	.	.
CP031806.1	-61.5671	-10.5636	0.941142	0	n/a	231	.	.	.	.	.	.	.	.	.	.	.	.	.	.	.	.	.	.	.	.	.	.	.	.	.	.	.	.	.	.	.	.	.	.	.	.	.	.	.	.	.	.	.
CP031794.1	-60.8104	-9.27497	1	0	n/a	36	.	.	.	.	.	.	.	.	.	.	.	.	.	.	.	.	.	.	.	.	.	.	.	.	.	.	.	.	.	.	.	.	.	.	.	.	.	.	.	.	.	.	.
CP030728.1	-58.5529	-9.31502	0.397796	0	n/a	274	.	.	.	.	.	.	.	.	.	.	.	.	.	.	.	.	.	.	.	.	.	.	.	.	.	.	.	.	.	.	.	.	.	.	.	.	.	.	.	.	.	.	.
CP028992.1	-60.7754	-8.56974	0.966709	0	n/a	34	.	.	.	.	.	.	.	.	.	.	.	.	.	.	.	.	.	.	.	.	.	.	.	.	.	.	.	.	.	.	.	.	.	.	.	.	.	.	.	.	.	.	.
CP028794.1	-59.8336	-9.39892	0.843515	0	n/a	11	.	.	.	.	.	.	.	.	.	.	.	.	.	.	.	.	.	.	.	.	.	.	.	.	.	.	.	.	.	.	.	.	.	.	.	.	.	.	.	.	.	.	.
CP027046.1	-63.0138	-9.35623	0.5943	0	n/a	147	.	.	.	.	.	.	.	.	.	.	.	.	.	.	.	.	.	.	.	.	.	.	.	.	.	.	.	.	.	.	.	.	.	.	.	.	.	.	.	.	.	.	.
CP024841.1	-60.9161	-10.0426	0.997721	0	n/a	147	.	.	.	.	.	.	.	.	.	.	.	.	.	.	.	.	.	.	.	.	.	.	.	.	.	.	.	.	.	.	.	.	.	.	.	.	.	.	.	.	.	.	.
CP024837.1	-60.9163	-10.028	0.996611	0	n/a	147	.	.	.	.	.	.	.	.	.	.	.	.	.	.	.	.	.	.	.	.	.	.	.	.	.	.	.	.	.	.	.	.	.	.	.	.	.	.	.	.	.	.	.
CP024433.1	-61.0623	-9.43328	1	0	n/a	147	.	.	.	.	.	.	.	.	.	.	.	.	.	.	.	.	.	.	.	.	.	.	.	.	.	.	.	.	.	.	.	.	.	.	.	.	.	.	.	.	.	.	.
CP023421.1	-60.6723	-9.01704	1	0	n/a	54	.	.	.	.	.	.	.	.	.	.	.	.	.	.	.	.	.	.	.	.	.	.	.	.	.	.	.	.	.	.	.	.	.	.	.	.	.	.	.	.	.	.	.
CP021957.1	-61.1126	-8.64211	0.949637	0	n/a	1161	.	.	.	.	.	.	.	.	.	.	.	.	.	.	.	.	.	.	.	.	.	.	.	.	.	.	.	.	.	.	.	.	.	.	.	.	.	.	.	.	.	.	.
CP021949.1	-61.7061	-10.2192	0.996611	0	n/a	147	.	.	.	.	.	.	.	.	.	.	.	.	.	.	.	.	.	.	.	.	.	.	.	.	.	.	.	.	.	.	.	.	.	.	.	.	.	.	.	.	.	.	.
CP021942.1	-61.7257	-10.2026	1	0	n/a	147	.	.	.	.	.	.	.	.	.	.	.	.	.	.	.	.	.	.	.	.	.	.	.	.	.	.	.	.	.	.	.	.	.	.	.	.	.	.	.	.	.	.	.
CP021760.1	-60.9108	-10.0332	0.991541	0	n/a	147	.	.	.	.	.	.	.	.	.	.	.	.	.	.	.	.	.	.	.	.	.	.	.	.	.	.	.	.	.	.	.	.	.	.	.	.	.	.	.	.	.	.	.
CP018721.1	-61.2301	-9.2613	1	0	n/a	147	.	.	.	.	.	.	.	.	.	.	.	.	.	.	.	.	.	.	.	.	.	.	.	.	.	.	.	.	.	.	.	.	.	.	.	.	.	.	.	.	.	.	.
CP018715.1	-61.2124	-9.26236	1	0	n/a	147	.	.	.	.	.	.	.	.	.	.	.	.	.	.	.	.	.	.	.	.	.	.	.	.	.	.	.	.	.	.	.	.	.	.	.	.	.	.	.	.	.	.	.
CP018709.1	-61.2301	-9.2613	1	0	n/a	147	.	.	.	.	.	.	.	.	.	.	.	.	.	.	.	.	.	.	.	.	.	.	.	.	.	.	.	.	.	.	.	.	.	.	.	.	.	.	.	.	.	.	.
CP018703.1	-61.2301	-9.2613	1	0	n/a	147	.	.	.	.	.	.	.	.	.	.	.	.	.	.	.	.	.	.	.	.	.	.	.	.	.	.	.	.	.	.	.	.	.	.	.	.	.	.	.	.	.	.	.
CP018697.1	-61.2124	-9.26237	1	0	n/a	147	.	.	.	.	.	.	.	.	.	.	.	.	.	.	.	.	.	.	.	.	.	.	.	.	.	.	.	.	.	.	.	.	.	.	.	.	.	.	.	.	.	.	.
CP018688.1	-61.2301	-9.2613	1	0	n/a	147	.	.	.	.	.	.	.	.	.	.	.	.	.	.	.	.	.	.	.	.	.	.	.	.	.	.	.	.	.	.	.	.	.	.	.	.	.	.	.	.	.	.	.
CP018314.1	-61.2124	-9.26236	1	0	n/a	147	.	.	.	.	.	.	.	.	.	.	.	.	.	.	.	.	.	.	.	.	.	.	.	.	.	.	.	.	.	.	.	.	.	.	.	.	.	.	.	.	.	.	.
CP017988.1	-61.2301	-9.2613	1	0	n/a	147	.	.	.	.	.	.	.	.	.	.	.	.	.	.	.	.	.	.	.	.	.	.	.	.	.	.	.	.	.	.	.	.	.	.	.	.	.	.	.	.	.	.	.
CP015504.1	-60.1619	-8.00552	0.616955	0	n/a	147	.	.	.	.	.	.	.	.	.	.	.	.	.	.	.	.	.	.	.	.	.	.	.	.	.	.	.	.	.	.	.	.	.	.	.	.	.	.	.	.	.	.	.
CP012429.1	-61.2902	-10.8561	0.66814	0	n/a	147	.	.	.	.	.	.	.	.	.	.	.	.	.	.	.	.	.	.	.	.	.	.	.	.	.	.	.	.	.	.	.	.	.	.	.	.	.	.	.	.	.	.	.
CP009878.1	-60.2242	-7.95205	0.595954	0	n/a	392	.	.	.	.	.	.	.	.	.	.	.	.	.	.	.	.	.	.	.	.	.	.	.	.	.	.	.	.	.	.	.	.	.	.	.	.	.	.	.	.	.	.	.
AP023151.1	-63.2057	-9.57919	0.511062	0	n/a	967	.	.	.	.	.	.	.	.	.	.	.	.	.	.	.	.	.	.	.	.	.	.	.	.	.	.	.	.	.	.	.	.	.	.	.	.	.	.	.	.	.	.	.
804398_p3	-34.8335	29.4391	0.659573	1	Georgia	48	.	.	.	.	.	.	.	.	.	.	.	.	.	.	.	.	.	.	.	.	.	.	.	.	.	.	.	.	.	.	.	.	.	.	.	.	.	.	IncFIB(pKPHS1)/78.57/94.09/560	.	.	.	.
21841_p2	-29.6544	28.5923	0.969489	1	Jordan	893	.	.	.	.	.	.	.	.	.	.	.	.	.	.	.	.	.	.	.	.	.	.	.	.	.	.	.	.	.	.	.	.	.	.	.	.	.	.	IncFIB(pKPHS1)/78.57/96.59/560	.	.	.	.
974367_p3	-33.4447	28.6087	0.942158	1	Thailand	23	.	.	.	.	.	.	.	.	.	.	.	.	.	.	.	.	.	.	.	.	.	.	.	.	.	.	.	.	.	.	.	.	.	.	.	.	.	.	IncFIB(pKPHS1)/78.57/94.55/560	.	.	.	.
480738_p2	-31.6375	28.9709	0.853557	1	Thailand	45	.	.	.	.	.	.	.	.	.	.	.	.	.	.	.	.	.	.	.	.	.	.	.	.	.	.	.	.	.	.	.	.	.	.	.	.	.	.	IncFIB(pKPHS1)/78.57/96.82/560	.	.	.	.
474269_p2	-30.5631	28.0339	0.979247	1	United States	23	.	.	.	.	.	.	.	.	.	.	.	.	.	.	.	.	.	.	.	.	.	.	.	.	.	.	.	.	.	.	.	.	.	.	.	.	.	.	IncFIB(pKPHS1)/78.57/94.32/560	.	.	.	.
15017_p2	-30.2152	30.9035	0.870735	1	United States	37	.	.	.	.	.	.	.	.	.	.	.	.	.	.	.	.	.	.	.	.	.	.	.	.	.	.	.	.	.	.	.	.	.	.	.	.	.	.	IncFIB(pKPHS1)/78.57/96.59/560	.	.	.	.
OX337254.1	-29.699	31.0158	0.767225	1	n/a	1788	.	.	.	.	.	.	.	.	.	.	.	.	.	.	.	.	.	.	.	.	.	.	.	.	.	.	.	.	.	.	.	.	.	.	.	.	.	.	IncFIB(pKPHS1)/100/98.75/560	.	.	.	.
OW969594.1	-30.8039	28.0602	0.95476	1	n/a	15	.	.	.	.	.	.	.	.	.	.	.	.	.	.	.	.	.	.	.	.	.	.	.	.	.	.	.	.	.	.	.	.	.	.	.	.	.	.	IncFIB(pKPHS1)/78.57/94.32/560	.	.	.	.
OW968391.1	-30.7978	30.1916	0.945995	1	n/a	15	.	.	.	.	.	.	.	.	.	.	.	.	.	.	.	.	.	.	.	.	.	.	.	.	.	.	.	.	.	.	.	.	.	.	.	.	.	.	IncFIB(pKPHS1)/78.57/99.77/560	.	.	.	.
OW967791.1	-29.6448	28.9089	1	1	n/a	340	.	.	.	.	.	.	.	.	.	.	.	.	.	.	.	.	.	.	.	.	.	.	.	.	.	.	.	.	.	.	.	.	.	.	.	.	.	.	IncFIB(pKPHS1)/100/98.75/560	.	.	.	.
OW967783.1	-29.5521	29.71	0.956453	1	n/a	151	.	.	.	.	.	.	.	.	.	.	.	.	.	.	.	.	.	.	.	.	.	.	.	.	.	.	.	.	.	.	.	.	.	.	.	.	.	.	IncFIB(pKPHS1)/78.57/94.55/560	.	.	.	.
OW966982.1	-30.3804	28.5631	0.965674	1	n/a	1189	.	.	.	.	.	.	.	.	.	.	.	.	.	.	.	.	.	.	.	.	.	.	.	.	.	.	.	.	.	.	.	.	.	.	.	.	.	.	IncFIB(pKPHS1)/100/98.21/560	.	.	.	.
OW849429.1	-29.6439	29.8407	0.991711	1	n/a	437	.	.	.	.	.	.	.	.	.	.	.	.	.	.	.	.	.	.	.	.	.	.	.	.	.	.	.	.	.	.	.	.	.	.	.	.	.	.	IncFIB(pKPHS1)/100/98.39/560	.	.	.	.
OW849327.1	-33.5525	29.865	0.942158	1	n/a	405	.	.	.	.	.	.	.	.	.	.	.	.	.	.	.	.	.	.	.	.	.	.	.	.	.	.	.	.	.	.	.	.	.	.	.	.	.	.	IncFIB(pKPHS1)/78.57/95/560	.	.	.	.
OW848870.1	-32.979	29.0242	1	1	n/a	405	.	.	.	.	.	.	.	.	.	.	.	.	.	.	.	.	.	.	.	.	.	.	.	.	.	.	.	.	.	.	.	.	.	.	.	.	.	.	IncFIB(pKPHS1)/78.57/93.86/560	.	.	.	.
OW848818.1	-32.9098	29.0922	0.942158	1	n/a	405	.	.	.	.	.	.	.	.	.	.	.	.	.	.	.	.	.	.	.	.	.	.	.	.	.	.	.	.	.	.	.	.	.	.	.	.	.	.	IncFIB(pKPHS1)/78.57/93.86/560	.	.	.	.
LR890743.1	-30.7164	26.2204	0.462511	1	n/a	3095	.	.	.	.	.	.	.	.	.	.	.	.	.	.	.	.	.	.	.	.	.	.	.	.	.	.	.	.	.	.	.	.	.	.	.	.	.	.	IncFIB(pHCM2)/100/99.89/875	Col440I/100/97.39/114	Col440I/100/97.39/114	.	.
LR890705.1	-30.3578	29.7203	1	1	n/a	231	.	.	.	.	.	.	.	.	.	.	.	.	.	.	.	.	.	.	.	.	.	.	.	.	.	.	.	.	.	.	.	.	.	.	.	.	.	.	IncFIB(pKPHS1)/78.57/99.77/560	.	.	.	.
LR890635.1	-30.3578	29.7203	1	1	n/a	231	.	.	.	.	.	.	.	.	.	.	.	.	.	.	.	.	.	.	.	.	.	.	.	.	.	.	.	.	.	.	.	.	.	.	.	.	.	.	IncFIB(pKPHS1)/78.57/99.77/560	.	.	.	.
LR890555.1	-31.1882	29.2971	1	1	n/a	412	.	.	.	.	.	.	.	.	.	.	.	.	.	.	.	.	.	.	.	.	.	.	.	.	.	.	.	.	.	.	.	.	.	.	.	.	.	.	IncFIB(pKPHS1)/78.57/94.32/560	.	.	.	.
LR890544.1	-33.4862	28.5216	0.942158	1	n/a	461	.	.	.	.	.	.	.	.	.	.	.	.	.	.	.	.	.	.	.	.	.	.	.	.	.	.	.	.	.	.	.	.	.	.	.	.	.	.	IncFIB(pKPHS1)/78.57/94.55/560	.	.	.	.
LR890518.1	-30.3578	29.7203	1	1	n/a	231	.	.	.	.	.	.	.	.	.	.	.	.	.	.	.	.	.	.	.	.	.	.	.	.	.	.	.	.	.	.	.	.	.	.	.	.	.	.	IncFIB(pKPHS1)/78.57/99.77/560	.	.	.	.
LR890503.1	-30.3578	29.7203	1	1	n/a	231	.	.	.	.	.	.	.	.	.	.	.	.	.	.	.	.	.	.	.	.	.	.	.	.	.	.	.	.	.	.	.	.	.	.	.	.	.	.	IncFIB(pKPHS1)/78.57/99.77/560	.	.	.	.
LR890429.1	-30.3578	29.7203	1	1	n/a	231	.	.	.	.	.	.	.	.	.	.	.	.	.	.	.	.	.	.	.	.	.	.	.	.	.	.	.	.	.	.	.	.	.	.	.	.	.	.	IncFIB(pKPHS1)/78.57/99.77/560	.	.	.	.
LR890293.1	-29.6945	30.9681	0.781135	1	n/a	1213	.	.	.	.	.	.	.	.	.	.	.	.	.	.	.	.	.	.	.	.	.	.	.	.	.	.	.	.	.	.	.	.	.	.	.	.	.	.	IncFIB(pKPHS1)/100/98.75/560	.	.	.	.
LR890257.1	-30.3578	29.7203	1	1	n/a	231	.	.	.	.	.	.	.	.	.	.	.	.	.	.	.	.	.	.	.	.	.	.	.	.	.	.	.	.	.	.	.	.	.	.	.	.	.	.	IncFIB(pKPHS1)/78.57/99.77/560	.	.	.	.
LR890237.1	-31.7207	30.4228	0.846258	1	n/a	105	.	.	.	.	.	.	.	.	.	.	.	.	.	.	.	.	.	.	.	.	.	.	.	.	.	.	.	.	.	.	.	.	.	.	.	.	.	.	IncFIB(pKPHS1)/78.57/94.09/560	.	.	.	.
LR890227.1	-31.0436	28.7392	1	1	n/a	3067	.	.	.	.	.	.	.	.	.	.	.	.	.	.	.	.	.	.	.	.	.	.	.	.	.	.	.	.	.	.	.	.	.	.	.	.	.	.	IncFIB(pKPHS1)/78.57/95.23/560	.	.	.	.
LR134218.1	-33.5308	30.2641	0.92345	1	n/a	71	.	.	.	.	.	.	.	.	.	.	.	.	.	.	.	.	.	.	.	.	.	.	.	.	.	.	.	.	.	.	.	.	.	.	.	.	.	.	IncFIB(pKPHS1)/100/95.36/560	.	.	.	.
CP122471.1	-30.8273	30.1802	1	1	n/a	16	.	.	.	.	.	.	.	.	.	.	.	.	.	.	.	.	.	.	.	.	.	.	.	.	.	.	.	.	.	.	.	.	.	.	.	.	.	.	IncFIB(pKPHS1)/78.57/99.77/560	.	.	.	.
CP122464.1	-30.8077	30.1216	0.985846	1	n/a	16	.	.	.	.	.	.	.	.	.	.	.	.	.	.	.	.	.	.	.	.	.	.	.	.	.	.	.	.	.	.	.	.	.	.	.	.	.	.	IncFIB(pKPHS1)/78.57/99.77/560	.	.	.	.
CP118908.1	-33.212	31.9593	0.547978	1	n/a	23	.	.	.	.	.	.	.	.	.	.	.	NDM-like	.	.	.	.	.	.	.	.	.	.	.	.	.	.	blaNDM-1	.	.	.	.	.	.	.	.	.	.	.	IncFIB(pKPHS1)/100/95.89/560	.	.	.	.
CP118903.1	-33.212	31.99	0.540795	1	n/a	76	.	.	.	.	.	.	.	.	.	.	.	NDM-like	.	.	.	.	.	SHV-like	.	.	.	.	.	.	.	.	blaNDM-1	.	.	.	.	.	.	.	.	.	.	blaSHV-12	IncX3/100/100/374	IncFIB(pKPHS1)/100/95.89/560	.	.	.
CP117747.1	-32.4506	27.1645	1	1	n/a	147	.	.	.	.	.	.	.	.	.	.	.	.	.	.	.	.	.	.	.	.	.	.	.	.	.	.	.	.	.	.	.	.	.	.	.	.	.	.	IncFIB(pKPHS1)/78.57/94.32/560	.	.	.	.
CP117742.1	-32.4506	27.1644	1	1	n/a	147	.	.	.	.	.	.	.	.	.	.	.	.	.	.	.	.	.	.	.	.	.	.	.	.	.	.	.	.	.	.	.	.	.	.	.	.	.	.	IncFIB(pKPHS1)/78.57/94.32/560	.	.	.	.
CP113175.1	-32.5723	29.6447	0.914585	1	n/a	963	.	.	.	.	.	.	.	.	.	.	.	.	.	.	.	.	.	.	.	.	.	.	.	.	.	.	.	.	.	.	.	.	.	.	.	.	.	.	IncFIB(pKPHS1)/78.57/94.77/560	.	.	.	.
CP110944.1	-29.5075	29.8987	1	1	n/a	512	.	.	.	.	.	.	.	.	.	.	KPC-like	.	.	.	.	.	.	.	.	.	.	.	blaKPC-3	.	.	.	.	.	.	.	.	.	.	.	.	.	.	.	IncFIB(pKPHS1)/100/98.39/560	.	.	.	.
CP109773.1	-31.6725	29.5377	0.942158	1	n/a	5	.	.	.	.	.	.	.	.	.	.	.	.	.	.	.	.	.	.	.	.	.	.	.	.	.	.	.	.	.	.	.	.	.	.	.	.	.	.	IncFIB(pKPHS1)/100/98.04/560	.	.	.	.
CP107386.1	-31.3629	31.3369	1	1	n/a	11	.	.	.	.	.	.	.	.	.	.	.	.	.	.	.	.	.	.	.	.	.	.	.	.	.	.	.	.	.	.	.	.	.	.	.	.	.	.	IncFIB(pKPHS1)/100/100/560	.	.	.	.
CP107375.1	-31.3629	31.3369	1	1	n/a	11	.	.	.	.	.	.	.	.	.	.	.	.	.	.	.	.	.	.	.	.	.	.	.	.	.	.	.	.	.	.	.	.	.	.	.	.	.	.	IncFIB(pKPHS1)/100/100/560	.	.	.	.
CP107355.1	-33.4136	28.7678	0.942158	1	n/a	1049	.	.	.	.	.	.	.	.	.	.	.	.	.	.	.	.	.	.	.	.	.	.	.	.	.	.	.	.	.	.	.	.	.	.	.	.	.	.	IncFIB(pKPHS1)/100/95.71/560	.	.	.	.
CP107348.1	-31.3629	31.3369	1	1	n/a	11	.	.	.	.	.	.	.	.	.	.	.	.	.	.	.	.	.	.	.	.	.	.	.	.	.	.	.	.	.	.	.	.	.	.	.	.	.	.	IncFIB(pKPHS1)/100/100/560	.	.	.	.
CP107337.1	-31.3629	31.3369	1	1	n/a	11	.	.	.	.	.	.	.	.	.	.	.	.	.	.	.	.	.	.	.	.	.	.	.	.	.	.	.	.	.	.	.	.	.	.	.	.	.	.	IncFIB(pKPHS1)/100/100/560	.	.	.	.
CP107330.1	-31.3629	31.3369	1	1	n/a	11	.	.	.	.	.	.	.	.	.	.	.	.	.	.	.	.	.	.	.	.	.	.	.	.	.	.	.	.	.	.	.	.	.	.	.	.	.	.	IncFIB(pKPHS1)/100/100/560	.	.	.	.
CP107323.1	-31.3469	31.1141	0.672588	1	n/a	11	.	.	.	.	.	.	.	.	.	.	.	.	.	.	.	.	.	.	.	.	.	.	.	.	.	.	.	.	.	.	.	.	.	.	.	.	.	.	IncFIB(pKPHS1)/100/100/560	.	.	.	.
CP107315.1	-31.5169	28.6535	0.924359	1	n/a	11	.	.	.	.	.	.	.	.	.	.	.	.	.	.	.	.	.	.	.	.	.	.	.	.	.	.	.	.	.	.	.	.	.	.	.	.	.	.	IncFIB(pKPHS1)/100/95.54/560	.	.	.	.
CP104797.1	-29.4691	31.2488	0.646975	1	n/a	16	.	.	.	.	.	.	.	.	.	.	.	NDM-like	.	.	.	.	.	.	.	.	.	.	.	.	.	.	.	.	.	.	.	.	.	.	.	.	.	.	IncFII(Yp)/88.7/90.43/230	IncFIB(pKPHS1)/100/98.75/560	.	.	.
CP103317.1	-29.6535	27.5902	0.77191	1	n/a	11	.	.	.	.	.	.	.	.	.	.	.	.	.	.	.	.	.	.	.	.	.	.	.	.	.	.	.	.	.	.	.	.	.	.	.	.	.	.	IncFIB(pKPHS1)/100/98.39/560	.	.	.	.
CP102873.1	-30.0359	28.853	1	1	n/a	495	.	.	.	.	.	.	.	.	.	.	.	.	.	.	.	.	.	.	.	.	.	.	.	.	.	.	.	.	.	.	.	.	.	.	.	.	.	.	IncFIB(pKPHS1)/100/99.64/560	.	.	.	.
CP102393.1	-31.3593	31.2582	0.64504	1	n/a	11	.	.	.	.	.	.	.	.	.	.	.	.	.	.	.	.	.	.	.	.	.	.	.	.	.	.	.	.	.	.	.	.	.	.	.	.	.	.	IncFIB(pKPHS1)/78.57/100/560	.	.	.	.
CP101549.1	-32.6045	29.5981	0.923717	1	n/a	437	.	.	.	.	.	.	.	.	.	.	.	.	.	.	.	.	.	.	.	.	.	.	.	.	.	.	.	.	.	.	.	.	.	.	.	.	.	.	IncFIB(pKPHS1)/100/95.89/560	.	.	.	.
CP100523.1	-31.2662	27.4438	1	1	n/a	427	.	.	.	.	.	.	.	.	.	.	.	.	.	.	.	.	.	.	.	.	.	.	.	.	.	.	.	.	.	.	.	.	.	.	.	.	.	.	IncFIB(pKPHS1)/78.57/94.09/560	.	.	.	.
CP100480.1	-31.3188	27.5269	0.902829	1	n/a	427	.	.	.	.	.	.	.	.	.	.	.	.	.	.	.	.	.	.	.	.	.	.	.	.	.	.	.	.	.	.	.	.	.	.	.	.	.	.	IncFIB(pKPHS1)/78.57/94.09/560	.	.	.	.
CP098158.1	-29.6886	31.076	1	1	n/a	950	.	.	.	.	.	.	.	.	.	.	.	.	.	.	.	.	.	.	.	.	.	.	.	.	.	.	.	.	.	.	.	.	.	.	.	.	.	.	IncFIB(pKPHS1)/100/99.82/560	.	.	.	.
CP098153.1	-29.7851	30.9267	0.809683	1	n/a	950	.	.	.	.	.	.	.	.	.	.	.	.	.	.	.	.	.	.	.	.	.	.	.	.	.	.	.	.	.	.	.	.	.	.	.	.	.	.	IncFIB(pKPHS1)/100/99.82/560	.	.	.	.
CP097705.1	-31.4152	30.1945	0.919861	1	n/a	11	.	.	.	.	.	.	.	.	.	.	.	.	.	.	.	.	.	.	.	.	.	.	.	.	.	.	.	.	.	.	.	.	.	.	.	.	.	.	IncFIB(pKPHS1)/100/99.82/560	.	.	.	.
CP097699.1	-28.924	28.7442	0.805804	1	n/a	11	.	.	.	.	.	.	.	.	.	.	.	.	.	.	.	.	.	.	.	.	.	.	.	.	.	.	.	.	.	.	.	.	.	.	.	.	.	.	IncFIB(pKPHS1)/100/95.54/560	.	.	.	.
CP097672.1	-29.6819	28.2666	0.920471	1	n/a	11	.	.	.	.	.	.	.	.	.	.	.	.	.	.	.	.	.	.	.	.	.	.	.	.	.	.	.	.	.	.	.	.	.	.	.	.	.	.	IncFIB(pKPHS1)/100/95.71/560	.	.	.	.
CP097387.1	-34.1587	27.6402	1	1	n/a	15	.	.	.	.	.	.	.	.	.	.	.	.	.	.	.	.	.	.	.	.	.	.	.	.	.	.	.	.	.	.	.	.	.	.	.	.	.	.	IncFIB(pKPHS1)/78.57/99.77/560	.	.	.	.
CP094899.1	-34.0531	30.8333	0.669751	1	n/a	941	.	.	.	.	.	.	.	.	.	.	.	.	.	.	.	.	.	.	.	.	.	.	.	.	.	.	.	.	.	.	.	.	.	.	.	.	.	.	IncFIB(pKPHS1)/78.57/94.55/560	.	.	.	.
CP092768.1	-29.7222	30.2053	1	1	n/a	512	.	.	.	.	.	.	.	.	.	.	.	.	.	.	.	.	.	.	.	.	.	.	.	.	.	.	.	.	.	.	.	.	.	.	.	.	.	.	IncFIB(pKPHS1)/78.57/99.77/560	.	.	.	.
CP092762.1	-29.7222	30.2053	1	1	n/a	512	.	.	.	.	.	.	.	.	.	.	.	.	.	.	.	.	.	.	.	.	.	.	.	.	.	.	.	.	.	.	.	.	.	.	.	.	.	.	IncFIB(pKPHS1)/78.57/99.77/560	.	.	.	.
CP092756.1	-29.834	30.145	1	1	n/a	512	.	.	.	.	.	.	.	.	.	.	.	.	.	.	.	.	.	.	.	.	.	.	.	.	.	.	.	.	.	.	.	.	.	.	.	.	.	.	IncFIB(pKPHS1)/78.57/99.77/560	.	.	.	.
CP092399.1	-33.6944	30.1199	0.89587	1	n/a	111	.	.	.	.	.	.	.	.	.	.	.	.	.	.	.	.	.	.	.	.	.	.	.	.	.	.	.	.	.	.	.	.	.	.	.	.	.	.	IncFIB(pKPHS1)/78.57/94.55/560	.	.	.	.
CP092338.1	-31.5743	28.3329	0.946917	1	n/a	15	.	.	.	.	.	.	.	.	.	.	.	.	.	.	.	.	.	.	.	.	.	.	.	.	.	.	.	.	.	.	.	.	.	.	.	.	.	.	IncFIB(pKPHS1)/78.57/95.91/560	.	.	.	.
CP091592.1	-30.0789	29.3395	1	1	n/a	147	.	.	.	.	.	.	.	.	.	.	.	.	.	.	.	.	.	.	.	.	.	.	.	.	.	.	.	.	.	.	.	.	.	.	.	.	.	.	IncFIB(pKPHS1)/100/99.82/560	.	.	.	.
CP090470.1	-34.0947	27.6973	0.731819	1	n/a	15	.	.	.	.	.	.	.	.	.	.	.	.	.	.	.	.	.	.	.	.	.	.	.	.	.	.	.	.	.	.	.	.	.	.	.	.	.	.	IncFIB(pKPHS1)/100/99.82/560	.	.	.	.
CP090221.1	-32.5262	29.9815	0.931603	1	n/a	1	.	.	.	.	.	.	.	.	.	.	.	.	.	.	.	.	.	.	.	.	.	.	.	.	.	.	.	.	.	.	.	.	.	.	.	.	.	.	IncFIB(pKPHS1)/78.57/95.91/560	.	.	.	.
CP089872.1	-30.2398	29.5081	1	1	n/a	490	.	.	.	.	.	.	.	.	.	.	.	.	.	.	.	.	.	.	.	.	.	.	.	.	.	.	.	.	.	.	.	.	.	.	.	.	.	.	IncFIB(pKPHS1)/100/98.75/560	.	.	.	.
CP089861.1	-33.47	28.5611	0.942158	1	n/a	23	.	.	.	.	.	.	.	.	.	.	.	.	.	.	.	.	.	.	.	.	.	.	.	.	.	.	.	.	.	.	.	.	.	.	.	.	.	.	IncFIB(pKPHS1)/100/95.71/560	.	.	.	.
CP089764.1	-34.2799	30.3599	0.692117	1	n/a	11	.	.	.	.	.	.	.	.	.	.	.	.	.	.	.	.	.	.	.	.	.	.	.	.	.	.	.	.	.	.	.	.	.	.	.	.	.	.	IncFIB(pKPHS1)/100/95.54/560	.	.	.	.
CP089018.1	-29.4313	29.8653	0.935596	1	n/a	11	.	.	.	.	.	.	.	.	.	.	.	.	.	.	.	.	.	.	.	.	.	.	.	.	.	.	.	.	.	.	.	.	.	.	.	.	.	.	IncFIB(pKPHS1)/100/98.21/560	.	.	.	.
CP086286.1	-30.8638	29.6691	1	1	n/a	1017	.	.	.	.	.	.	.	.	.	.	.	.	.	.	.	.	.	.	.	.	.	.	.	.	.	.	.	.	.	.	.	.	.	.	.	.	.	.	IncFIB(pKPHS1)/100/99.46/560	.	.	.	.
CP085480.1	-32.957	29.0484	0.942158	1	n/a	412	.	.	.	.	.	.	.	.	.	.	.	.	.	.	.	.	.	.	.	.	.	.	.	.	.	.	.	.	.	.	.	.	.	.	.	.	.	.	IncFIB(pKPHS1)/100/98.57/560	.	.	.	.
CP084854.1	-29.7906	30.9328	0.809999	1	n/a	14	.	.	.	.	.	.	.	.	.	.	.	.	.	.	.	.	.	.	.	.	.	.	.	.	.	.	.	.	.	.	.	.	.	.	.	.	.	.	IncFIB(pKPHS1)/78.57/99.55/560	.	.	.	.
CP084845.1	-34.0183	30.7367	1	1	n/a	2668	.	.	.	.	.	.	.	.	.	.	.	.	.	.	.	.	.	.	.	.	.	.	.	.	.	.	.	.	.	.	.	.	.	.	.	.	.	.	IncFIB(pKPHS1)/78.57/94.09/560	.	.	.	.
CP084833.1	-33.939	30.6386	0.699018	1	n/a	133	.	.	.	.	.	.	.	.	.	.	.	.	.	.	.	.	.	.	.	.	.	.	.	.	.	.	.	.	.	.	.	.	.	.	.	.	.	.	IncFIB(pKPHS1)/78.57/94.09/560	.	.	.	.
CP084826.1	-30.9708	27.4116	0.814397	1	n/a	55	.	.	.	.	.	.	.	.	.	.	.	.	.	.	.	.	.	.	.	.	.	.	.	.	.	.	.	.	.	.	.	.	.	.	.	.	.	.	IncFIB(pKPHS1)/78.57/94.09/560	.	.	.	.
CP084394.1	-32.4506	27.1643	1	1	n/a	147	.	.	.	.	.	.	.	.	.	.	.	.	.	.	.	.	.	.	.	.	.	.	.	.	.	.	.	.	.	.	.	.	.	.	.	.	.	.	IncFIB(pKPHS1)/78.57/94.32/560	.	.	.	.
CP084243.1	-32.7614	29.41	0.942158	1	n/a	43	.	.	.	.	.	.	.	.	.	.	.	.	.	.	.	.	.	.	.	.	.	.	.	.	.	.	.	.	.	.	.	.	.	.	.	.	.	.	IncFIB(pKPHS1)/100/98.75/560	.	.	.	.
CP083035.1	-31.4901	29.6297	0.945249	1	n/a	16	.	.	.	.	.	.	.	.	.	.	.	.	.	.	.	.	.	.	.	.	.	.	.	.	.	.	.	.	.	.	.	.	.	.	.	.	.	.	IncFIB(pKPHS1)/100/98.04/560	.	.	.	.
CP082991.1	-32.4506	27.1643	1	1	n/a	147	.	.	.	.	.	.	.	.	.	.	.	.	.	.	.	.	.	.	.	.	.	.	.	.	.	.	.	.	.	.	.	.	.	.	.	.	.	.	IncFIB(pKPHS1)/78.57/94.32/560	.	.	.	.
CP082792.1	-32.9086	28.3317	0.923639	1	n/a	101	.	.	.	.	.	.	.	.	.	.	.	.	.	.	.	.	.	.	.	.	.	.	.	.	.	.	.	.	.	.	.	.	.	.	.	.	.	.	IncFIB(pKPHS1)/78.57/94.55/560	.	.	.	.
CP082006.1	-31.596	28.417	0.93817	1	n/a	2237	.	.	.	.	.	.	.	.	.	.	.	.	.	.	.	.	.	.	.	.	.	.	.	.	.	.	.	.	.	.	.	.	.	.	.	.	.	.	IncFIB(pKPHS1)/78.57/94.09/560	.	.	.	.
CP081867.1	-32.4709	27.1058	0.630885	1	n/a	147	.	.	.	.	.	.	.	.	.	.	.	.	.	.	.	.	.	.	.	.	.	.	.	.	.	.	.	.	.	.	.	.	.	.	.	.	.	.	IncFIB(pKPHS1)/100/95.54/560	.	.	.	.
CP080364.1	-29.3534	29.4307	1	1	n/a	16	.	.	.	.	.	.	.	.	.	.	.	.	.	.	.	.	.	.	.	.	.	.	.	.	.	.	.	.	.	.	.	.	.	.	.	.	.	.	IncFIB(pKPHS1)/100/98.04/560	.	.	.	.
CP080358.1	-30.8161	30.1067	0.990474	1	n/a	16	.	.	.	.	.	.	.	.	.	.	.	.	.	.	.	.	.	.	.	.	.	.	.	.	.	.	.	.	.	.	.	.	.	.	.	.	.	.	IncFIB(pKPHS1)/100/99.82/560	.	.	.	.
CP079763.1	-33.1137	30.8207	0.840411	1	n/a	15	.	.	.	.	.	.	.	.	.	.	.	.	.	.	.	.	.	.	.	.	.	.	.	.	.	.	.	.	.	.	.	.	.	.	.	.	.	.	IncFIB(pKPHS1)/100/95.54/560	.	.	.	.
CP079728.1	-34.1587	27.6402	1	1	n/a	15	.	.	.	.	.	.	.	.	.	.	.	.	.	.	.	.	.	.	.	.	.	.	.	.	.	.	.	.	.	.	.	.	.	.	.	.	.	.	IncFIB(pKPHS1)/78.57/99.77/560	.	.	.	.
CP079133.1	-33.0133	28.4782	0.902616	1	n/a	14	.	.	.	.	.	.	.	.	.	.	.	.	.	.	.	.	.	.	.	.	.	.	.	.	.	.	.	.	.	.	.	.	.	.	.	.	.	.	IncFIB(pKPHS1)/100/98.57/560	.	.	.	.
CP079122.1	-33.0134	28.4752	0.903386	1	n/a	14	.	.	.	.	.	.	.	.	.	.	.	.	.	.	.	.	.	.	.	.	.	.	.	.	.	.	.	.	.	.	.	.	.	.	.	.	.	.	IncFIB(pKPHS1)/100/98.57/560	.	.	.	.
CP075317.1	-31.6336	28.4062	0.908291	1	n/a	2237	.	.	.	.	.	.	.	.	.	.	.	.	.	.	.	.	.	.	.	.	.	.	.	.	.	.	.	.	.	.	.	.	.	.	.	.	.	.	IncFIB(pKPHS1)/78.57/94.09/560	.	.	.	.
CP075258.1	-33.126	30.7284	0.854058	1	n/a	147	.	.	.	.	.	.	.	.	.	.	.	.	.	.	.	.	.	.	.	.	.	.	.	.	.	.	.	.	.	.	.	.	.	.	.	.	.	.	IncFIB(pKPHS1)/78.57/94.32/560	.	.	.	.
CP074089.1	-32.4506	27.1643	1	1	n/a	147	.	.	.	.	.	.	.	.	.	.	.	.	.	.	.	.	.	.	.	.	.	.	.	.	.	.	.	.	.	.	.	.	.	.	.	.	.	.	IncFIB(pKPHS1)/78.57/94.32/560	.	.	.	.
CP073786.1	-29.7331	27.7627	0.812117	1	n/a	420	.	.	.	.	.	.	.	.	.	.	.	.	.	.	.	.	.	.	.	.	.	.	.	.	.	.	.	.	.	.	.	.	.	.	.	.	.	.	IncFIB(pKPHS1)/100/98.21/560	.	.	.	.
CP072464.1	-30.4716	28.5244	1	1	n/a	11	.	.	.	.	.	.	.	.	.	.	.	.	.	.	.	.	.	.	.	.	.	.	.	.	.	.	.	.	.	.	.	.	.	.	.	.	.	.	IncFIB(pKPHS1)/100/96.07/560	.	.	.	.
CP071082.1	-32.9264	29.1006	0.942158	1	n/a	268	.	.	.	.	.	.	.	.	.	.	.	.	.	.	.	.	.	.	.	.	.	.	.	.	.	.	.	.	.	.	.	.	.	.	.	.	.	.	IncFIB(pKPHS1)/78.57/93.86/560	.	.	.	.
CP071029.1	-32.4506	27.1643	1	1	n/a	147	.	.	.	.	.	.	.	.	.	.	.	.	.	.	.	.	.	.	.	.	.	.	.	.	.	.	.	.	.	.	.	.	.	.	.	.	.	.	IncFIB(pKPHS1)/78.57/94.32/560	.	.	.	.
CP070892.1	-32.4148	27.3141	0.669811	1	n/a	147	.	.	.	.	.	.	.	.	.	.	.	.	.	.	.	.	.	.	.	.	.	.	.	.	.	.	.	.	.	.	.	.	.	.	.	.	.	.	IncFIB(pKPHS1)/78.57/94.32/560	.	.	.	.
CP070439.1	-30.8279	30.1795	1	1	n/a	16	.	.	.	.	.	.	.	.	.	.	.	.	.	.	.	.	.	.	.	.	.	.	.	.	.	.	.	.	.	.	.	.	.	.	.	.	.	.	IncFIB(pKPHS1)/78.57/99.77/560	.	.	.	.
CP069855.1	-33.5381	27.6871	0.867358	1	n/a	70	.	.	.	.	.	.	.	.	.	.	.	.	.	.	.	.	.	.	.	.	.	.	.	.	.	.	.	.	.	.	.	.	.	.	.	.	.	.	IncFIB(pKPHS1)/100/95.54/560	.	.	.	.
CP067904.1	-32.3638	30.5063	0.792968	1	n/a	834	.	.	.	.	.	.	.	.	.	.	.	.	.	.	.	.	.	.	.	.	.	.	.	.	.	.	.	.	.	.	.	.	.	.	.	.	.	.	IncFIB(pKPHS1)/78.57/93.86/560	.	.	.	.
CP067824.1	-34.7462	30.1975	0.680578	1	n/a	551	.	.	.	.	.	.	.	.	.	.	.	.	.	.	.	.	.	.	.	.	.	.	.	.	.	.	.	.	.	.	.	.	.	.	.	.	.	.	IncFIB(pKPHS1)/78.57/94.09/560	.	.	.	.
CP067511.1	-29.5134	29.8954	1	1	n/a	15	.	.	.	.	.	.	.	.	.	.	.	.	.	.	.	.	.	.	.	.	.	.	.	.	.	.	.	.	.	.	.	.	.	.	.	.	.	.	IncFIB(pKPHS1)/78.57/97.95/560	.	.	.	.
CP067456.1	-28.784	28.0064	0.566828	1	n/a	258	.	.	.	.	.	.	.	.	.	.	.	.	.	.	.	.	.	.	.	.	.	.	.	.	.	.	.	.	.	.	.	.	.	.	.	.	.	.	IncFIB(pKPHS1)/78.57/95.23/560	.	.	.	.
CP065450.1	-29.5977	29.821	0.983536	1	n/a	11	.	.	.	.	.	.	.	.	.	.	.	.	.	.	.	.	.	.	.	.	.	.	.	.	.	.	.	.	.	.	.	.	.	.	.	.	.	.	IncFIB(pKPHS1)/100/98.21/560	.	.	.	.
CP064822.1	-31.8416	31.0542	0.69065	1	n/a	-	.	.	.	.	.	.	.	.	.	.	.	.	.	.	.	.	.	.	.	.	.	.	.	.	.	.	.	.	.	.	.	.	.	.	.	.	.	.	IncFIB(pKPHS1)/98.75/98.21/560	.	.	.	.
CP064213.1	-30.1237	31.2985	0.692448	1	n/a	11	.	.	.	.	.	.	.	.	.	.	.	.	.	.	.	.	.	.	.	.	.	.	.	.	.	.	.	.	.	.	.	.	.	.	.	.	.	.	IncFIB(pKPHS1)/100/97.32/560	.	.	.	.
CP064210.1	-33.1181	28.7215	0.942158	1	n/a	23	.	.	.	.	.	.	.	.	.	.	.	.	.	.	.	.	.	.	.	.	.	.	.	.	.	.	.	.	.	.	.	.	.	.	.	.	.	.	IncFIB(pKPHS1)/100/98.57/560	.	.	.	.
CP063882.1	-30.3046	29.6758	1	1	n/a	629	.	.	.	.	.	.	.	.	.	.	.	.	.	.	.	.	.	.	.	.	.	.	.	.	.	.	.	.	.	.	.	.	.	.	.	.	.	.	IncFIB(pKPHS1)/100/99.82/560	.	.	.	.
CP063873.1	-31.1856	29.2922	1	1	n/a	1662	.	.	.	.	.	.	.	.	.	.	.	.	.	.	.	.	.	.	.	.	.	.	.	.	.	.	.	.	.	.	.	.	.	.	.	.	.	.	IncFIB(pKPHS1)/100/95.54/560	.	.	.	.
CP063862.1	-33.4324	30.0632	0.942158	1	n/a	1	.	.	.	.	.	.	.	.	.	.	.	.	.	.	.	.	.	.	.	.	.	.	.	.	.	.	.	.	.	.	.	.	.	.	.	.	.	.	IncFIB(pKPHS1)/100/95.36/560	.	.	.	.
CP063853.1	-33.4316	30.0632	0.942158	1	n/a	1	.	.	.	.	.	.	.	.	.	.	.	.	.	.	.	.	.	.	.	.	.	.	.	.	.	.	.	.	.	.	.	.	.	.	.	.	.	.	IncFIB(pKPHS1)/100/95.36/560	.	.	.	.
CP063217.1	-29.2205	29.9349	0.916984	1	n/a	15	.	.	.	.	.	.	.	.	.	.	.	.	.	.	.	.	.	.	.	.	.	.	.	.	.	.	.	.	.	.	.	.	.	.	.	.	.	.	IncFIB(pKPHS1)/100/97.32/560	.	.	.	.
CP061398.1	-28.8158	27.9992	0.572215	1	n/a	258	.	.	.	.	.	.	.	.	.	.	KPC-like	.	.	.	.	.	.	.	.	.	.	.	blaKPC-3	.	.	.	.	.	.	.	.	.	.	.	.	.	.	.	IncFIB(pKPHS1)/78.57/95.23/560	.	.	.	.
CP061391.1	-29.6904	31.0783	1	1	n/a	14	.	.	.	.	.	.	.	.	.	.	.	.	.	.	.	.	.	.	.	.	.	.	.	.	.	.	.	.	.	.	.	.	.	.	.	.	.	.	IncFIB(pKPHS1)/78.57/99.55/560	.	.	.	.
CP061065.1	-33.0284	28.4346	1	1	n/a	147	.	.	.	.	.	.	.	.	.	.	.	.	.	.	.	.	.	.	.	.	.	.	.	.	.	.	.	.	.	.	.	.	.	.	.	.	.	.	IncFIB(pKPHS1)/100/98.57/560	.	.	.	.
CP061056.1	-33.0129	28.4759	0.903564	1	n/a	147	.	.	.	.	.	.	.	.	.	.	.	.	.	.	.	.	.	.	.	.	.	.	.	.	.	.	.	.	.	.	.	.	.	.	.	.	.	.	IncFIB(pKPHS1)/100/98.57/560	.	.	.	.
CP059316.1	-30.0789	29.3405	1	1	n/a	147	.	.	.	.	.	.	.	.	.	.	.	.	.	.	.	.	.	.	.	.	.	.	.	.	.	.	.	.	.	.	.	.	.	.	.	.	.	.	IncFIB(pKPHS1)/78.57/99.77/560	.	.	.	.
CP058547.1	-34.8031	28.93	0.647964	1	n/a	1269	.	.	.	.	.	.	.	.	.	.	.	.	OXA-10-like	.	.	.	.	.	.	.	.	.	.	.	.	.	.	.	.	.	.	.	.	.	.	.	.	.	IncFIB(pKPHS1)/100/95.89/560	.	.	.	.
CP058330.1	-29.5713	29.8804	0.980245	1	n/a	512	.	.	.	.	.	.	.	.	.	.	KPC-like	.	.	.	.	.	.	.	.	.	.	.	.	.	.	.	.	.	.	.	.	.	.	.	.	.	.	.	IncFIB(pKPHS1)/100/98.39/560	.	.	.	.
CP056436.1	-33.9057	30.4594	0.721829	1	n/a	20	.	.	.	.	.	.	.	.	.	.	.	.	.	.	.	.	.	.	.	.	.	.	.	.	.	.	.	.	.	.	.	.	.	.	.	.	.	.	IncFIB(pKPHS1)/78.57/95/560	.	.	.	.
CP056309.1	-34.1036	30.8914	0.648367	1	n/a	3705	.	.	.	.	.	.	.	.	.	.	.	.	.	.	.	.	.	.	.	.	.	.	.	.	.	.	.	.	.	.	.	.	.	.	.	.	.	.	IncFIB(pKPHS1)/78.57/94.55/560	.	.	.	.
CP056303.1	-33.3233	29.4393	0.942158	1	n/a	2552	.	.	.	.	.	.	.	.	.	.	.	.	.	.	.	.	.	.	.	.	.	.	.	.	.	.	.	.	.	.	.	.	.	.	.	.	.	.	IncFIB(pKPHS1)/78.57/94.32/560	.	.	.	.
CP056224.1	-30.8399	30.4347	0.939161	1	n/a	461	.	.	.	.	.	.	.	.	.	.	.	.	.	.	.	.	.	.	.	.	.	.	.	.	.	.	.	.	.	.	.	.	.	.	.	.	.	.	IncFIB(pKPHS1)/78.57/99.77/560	.	.	.	.
CP055511.1	-34.1042	30.8935	0.647738	1	n/a	3705	.	.	.	.	.	.	.	.	.	.	.	.	.	.	.	.	.	.	.	.	.	.	.	.	.	.	.	.	.	.	.	.	.	.	.	.	.	.	IncFIB(pKPHS1)/78.57/94.55/560	.	.	.	.
CP054987.1	-33.6314	30.0732	0.9395	1	n/a	45	.	.	.	.	.	.	.	.	.	.	.	.	.	.	.	.	.	.	.	.	.	.	.	.	.	.	.	.	.	.	.	.	.	.	.	.	.	.	IncFIB(pKPHS1)/78.57/94.55/560	.	.	.	.
CP054975.1	-29.5834	29.8269	0.969791	1	n/a	2190	.	.	.	.	.	.	.	.	.	.	.	.	.	.	.	.	.	.	.	.	.	.	.	.	.	.	.	.	.	.	.	.	.	.	.	.	.	.	IncFIB(pKPHS1)/78.57/98.18/560	.	.	.	.
CP053864.1	-33.2581	28.8694	0.942158	1	n/a	1660	.	.	.	.	.	.	.	.	.	.	.	.	.	.	.	.	.	.	.	.	.	.	.	.	.	.	.	.	.	.	.	.	.	.	.	.	.	.	IncFIB(pKPHS1)/100/95.71/560	.	.	.	.
CP052552.1	-31.6561	28.2657	1	1	n/a	789	.	.	.	.	.	.	.	.	.	.	.	.	.	.	.	.	.	.	.	.	.	.	.	.	.	.	.	.	.	.	.	.	.	.	.	.	.	.	IncFIB(pKPHS1)/78.57/94.09/560	.	.	.	.
CP052527.1	-33.969	30.7384	0.720494	1	n/a	11	.	.	.	.	.	.	.	.	.	.	.	.	.	.	.	.	.	.	.	.	.	.	.	.	.	.	.	.	.	.	.	.	.	.	.	.	.	.	IncFIB(pKPHS1)/78.57/94.32/560	.	.	.	.
CP052478.1	-31.6561	28.2658	1	1	n/a	789	.	.	.	.	.	.	.	.	.	.	.	.	.	.	.	.	.	.	.	.	.	.	.	.	.	.	.	.	.	.	.	.	.	.	.	.	.	.	IncFIB(pKPHS1)/78.57/94.09/560	.	.	.	.
CP052470.1	-31.6561	28.2658	1	1	n/a	789	.	.	.	.	.	.	.	.	.	.	.	.	.	.	.	.	.	.	.	.	.	.	.	.	.	.	.	.	.	.	.	.	.	.	.	.	.	.	IncFIB(pKPHS1)/78.57/94.09/560	.	.	.	.
CP052416.1	-31.6561	28.2658	1	1	n/a	789	.	.	.	.	.	.	.	.	.	.	.	.	.	.	.	.	.	.	.	.	.	.	.	.	.	.	.	.	.	.	.	.	.	.	.	.	.	.	IncFIB(pKPHS1)/78.57/94.09/560	.	.	.	.
CP052409.1	-31.6649	28.2447	0.912179	1	n/a	789	.	.	.	.	.	.	.	.	.	.	.	.	.	.	.	.	.	.	.	.	.	.	.	.	.	.	.	.	.	.	.	.	.	.	.	.	.	.	IncFIB(pKPHS1)/78.57/94.09/560	.	.	.	.
CP052393.1	-27.5559	29.943	0.452126	1	n/a	4877	.	.	.	.	.	CTX-M-1-like	.	.	.	.	.	.	.	OXA-1-like	.	.	.	.	blaCTX-M-15	.	.	.	.	.	.	.	.	blaOXA-1	.	.	.	.	.	.	.	.	.	.	IncFIB(pKPHS1)/100/98.39/560	.	.	.	.
CP052390.1	-30.7968	30.0678	1	1	n/a	14	.	.	.	.	.	.	.	.	.	.	.	.	.	.	.	.	.	.	.	.	.	.	.	.	.	.	.	.	.	.	.	.	.	.	.	.	.	.	IncFIB(pKPHS1)/78.57/99.77/560	.	.	.	.
CP052352.1	-27.5396	29.9373	0.449797	1	n/a	4877	.	.	.	.	.	CTX-M-1-like	.	.	.	.	.	.	.	OXA-1-like	.	.	.	.	blaCTX-M-15	.	.	.	.	.	.	.	.	blaOXA-1	.	.	.	.	.	.	.	.	.	.	IncFIB(pKPHS1)/100/98.39/560	.	.	.	.
CP052311.1	-27.5874	29.9352	0.457458	1	n/a	15	.	.	.	.	.	CTX-M-1-like	.	.	.	.	.	.	.	.	.	.	.	.	blaCTX-M-15	.	.	.	.	.	.	.	.	.	.	.	.	.	.	.	.	.	.	.	IncFIB(pKPHS1)/100/98.39/560	.	.	.	.
CP052281.1	-27.5752	29.9358	0.455878	1	n/a	15	.	.	.	.	.	CTX-M-1-like	.	.	.	.	.	.	.	OXA-1-like	.	.	.	.	blaCTX-M-15	.	.	.	.	.	.	.	.	blaOXA-1	.	.	.	.	.	.	.	.	.	.	IncFIB(pKPHS1)/100/98.39/560	.	.	.	.
CP052264.1	-32.7818	29.2057	0.942158	1	n/a	45	.	.	.	.	.	.	.	.	.	.	.	.	.	.	.	.	.	.	.	.	.	.	.	.	.	.	.	.	.	.	.	.	.	.	.	.	.	.	IncFIB(pKPHS1)/100/99.11/560	.	.	.	.
CP052220.1	-31.1336	28.4604	1	1	n/a	15	.	.	.	.	.	.	.	.	.	.	.	.	.	.	.	.	.	.	.	.	.	.	.	.	.	.	.	.	.	.	.	.	.	.	.	.	.	.	IncFIB(pKPHS1)/100/98.57/560	.	.	.	.
CP050365.1	-34.0229	27.7755	0.756301	1	n/a	147	.	.	.	.	.	.	.	.	.	.	.	.	.	.	.	.	.	.	.	.	.	.	.	.	.	.	.	.	.	.	.	.	.	.	.	.	.	.	IncFIB(pKPHS1)/100/99.82/560	.	.	.	.
CP050356.1	-29.954	29.7941	1	1	n/a	11	.	.	.	.	.	.	.	.	.	.	.	.	.	.	.	.	.	.	.	.	.	.	.	.	.	.	.	.	.	.	.	.	.	.	.	.	.	.	IncFIB(pKPHS1)/100/98.39/560	.	.	.	.
CP050350.1	-29.954	29.7941	1	1	n/a	11	.	.	.	.	.	.	.	.	.	.	.	.	.	.	.	.	.	.	.	.	.	.	.	.	.	.	.	.	.	.	.	.	.	.	.	.	.	.	IncFIB(pKPHS1)/100/98.39/560	.	.	.	.
CP050344.1	-30.0951	29.745	1	1	n/a	11	.	.	.	.	.	.	.	.	.	.	.	.	.	.	.	.	.	.	.	.	.	.	.	.	.	.	.	.	.	.	.	.	.	.	.	.	.	.	IncFIB(pKPHS1)/100/98.39/560	.	.	.	.
CP050338.1	-30.0919	29.7483	1	1	n/a	11	.	.	.	.	.	.	.	.	.	.	.	.	.	.	.	.	.	.	.	.	.	.	.	.	.	.	.	.	.	.	.	.	.	.	.	.	.	.	IncFIB(pKPHS1)/100/98.39/560	.	.	.	.
CP050287.1	-30.1199	31.3292	0.680225	1	n/a	-	.	.	.	.	.	.	.	.	.	.	.	.	.	.	.	.	.	.	.	.	.	.	.	.	.	.	.	.	.	.	.	.	.	.	.	.	.	.	IncFIB(pKPHS1)/100/97.32/560	.	.	.	.
CP050277.1	-29.6477	32.62	0.381384	1	n/a	-	.	.	.	.	.	.	.	.	.	.	.	.	.	.	.	.	.	.	.	.	.	.	.	.	.	.	.	.	.	.	.	.	.	.	.	.	.	.	.	.	.	.	.
CP047636.1	-31.4875	29.6284	0.943111	1	n/a	1027	.	.	.	.	.	.	.	.	.	.	.	.	.	.	.	.	.	.	.	.	.	.	.	.	.	.	.	.	.	.	.	.	.	.	.	.	.	.	IncFIB(pKPHS1)/100/98.04/560	.	.	.	.
CP046951.1	-31.0037	27.4909	0.843789	1	n/a	15	.	.	.	.	.	.	.	.	.	.	.	.	.	.	.	.	.	.	.	.	.	.	.	.	.	.	.	.	.	.	.	.	.	.	.	.	.	.	IncFIB(pKPHS1)/78.57/94.55/560	.	.	.	.
CP046941.1	-31.0005	27.484	0.839096	1	n/a	15	.	.	.	.	.	.	.	.	.	.	.	.	.	.	.	.	.	.	.	.	.	.	.	.	.	.	.	.	.	.	.	.	.	.	.	.	.	.	IncFIB(pKPHS1)/78.57/94.55/560	.	.	.	.
CP046383.1	-31.0037	27.4909	0.84379	1	n/a	15	.	.	.	.	.	.	.	.	.	.	.	.	.	.	.	.	.	.	.	.	.	.	.	.	.	.	.	.	.	.	.	.	.	.	.	.	.	.	IncFIB(pKPHS1)/78.57/94.55/560	.	.	.	.
CP045677.1	-34.0769	27.7199	0.746754	1	n/a	15	.	.	.	.	.	.	.	.	.	.	.	.	.	.	.	.	.	.	.	.	.	.	.	.	.	.	.	.	.	.	.	.	.	.	.	.	.	.	IncFIB(pKPHS1)/78.57/99.77/560	.	.	.	.
CP044370.1	-33.3796	30.2691	0.942158	1	n/a	-	.	.	.	.	.	.	.	.	.	.	.	.	.	.	.	.	.	.	.	.	.	.	.	.	.	.	.	.	.	.	.	.	.	.	.	.	.	.	IncFIB(pKPHS1)/99.64/98.04/560	.	.	.	.
CP044046.1	-33.0085	28.8024	0.905108	1	n/a	231	.	.	.	.	.	.	.	.	.	.	.	.	.	.	.	.	.	.	.	.	.	.	.	.	.	.	.	.	.	.	.	.	.	.	.	.	.	.	IncFIB(pKPHS1)/100/97.32/560	.	.	.	.
CP044034.1	-31.2342	27.1926	0.824805	1	n/a	-	.	.	.	.	.	.	.	.	.	.	.	.	.	.	.	.	.	.	.	.	.	.	.	.	.	.	.	.	.	.	.	.	.	.	.	.	.	.	IncFIB(pKPHS1)/100/95.71/560	.	.	.	.
CP044030.1	-33.3212	28.4638	0.942158	1	n/a	35	.	.	.	.	.	.	.	.	.	.	.	.	.	.	.	.	.	.	.	.	.	.	.	.	.	.	.	.	.	.	.	.	.	.	.	.	.	.	IncFIB(pKPHS1)/100/95.71/560	.	.	.	.
CP041929.1	-29.3534	29.4297	1	1	n/a	16	.	.	.	.	.	.	.	.	.	.	.	.	.	.	.	.	.	.	.	.	.	.	.	.	.	.	.	.	.	.	.	.	.	.	.	.	.	.	IncFIB(pKPHS1)/100/98.04/560	.	.	.	.
CP041101.1	-33.4547	30.1201	0.942158	1	n/a	1	.	.	.	.	.	.	.	.	.	.	.	.	.	.	.	.	.	.	.	.	.	.	.	.	.	.	.	.	.	.	.	.	.	.	.	.	.	.	IncFIB(pKPHS1)/78.57/94.09/560	.	.	.	.
CP040729.1	-32.4198	27.3007	0.665683	1	n/a	147	.	.	.	.	.	.	.	.	.	.	.	.	.	.	.	.	.	.	.	.	.	.	.	.	.	.	.	.	.	.	.	.	.	.	.	.	.	.	IncFIB(pKPHS1)/100/95.54/560	.	.	.	.
CP040597.1	-30.6503	29.6206	1	1	n/a	15	.	.	.	.	.	.	.	.	.	.	.	.	.	.	.	.	.	.	.	.	.	.	.	.	.	.	.	.	.	.	.	.	.	.	.	.	.	.	IncFIB(pKPHS1)/100/97.32/560	.	.	.	.
CP040447.1	-30.8278	30.1795	1	1	n/a	16	.	.	.	.	.	.	.	.	.	.	.	.	.	.	.	.	.	.	.	.	.	.	.	.	.	.	.	.	.	.	.	.	.	.	.	.	.	.	IncFIB(pKPHS1)/78.57/99.77/560	.	.	.	.
CP040026.1	-29.5887	29.8281	0.97426	1	n/a	11	.	.	.	.	.	.	.	.	.	.	.	.	.	.	.	.	.	.	.	.	.	.	.	.	.	.	.	.	.	.	.	.	.	.	.	.	.	.	IncFIB(pKPHS1)/100/98.21/560	.	.	.	.
CP036373.1	-29.7826	29.009	1	1	n/a	11	.	.	.	.	.	.	.	.	.	.	.	.	.	.	.	.	.	.	.	.	.	.	.	.	.	.	.	.	.	.	.	.	.	.	.	.	.	.	IncFIB(pKPHS1)/100/98.57/560	.	.	.	.
CP036194.1	-33.6481	30.1646	0.905126	1	n/a	23	.	.	.	.	.	.	.	.	.	.	.	.	.	.	.	.	.	.	.	.	.	.	.	.	.	.	.	.	.	.	.	.	.	.	.	.	.	.	IncFIB(pKPHS1)/100/95.71/560	.	.	.	.
CP035909.1	-33.6452	30.1647	0.906804	1	n/a	23	.	.	.	.	.	.	.	.	.	.	.	.	.	.	.	.	.	.	.	.	.	.	.	.	.	.	.	.	.	.	.	.	.	.	.	.	.	.	IncFIB(pKPHS1)/78.57/94.55/560	.	.	.	.
CP034055.1	-33.8585	29.865	1	1	n/a	15	.	.	.	.	.	.	.	.	.	.	.	.	.	.	.	.	.	.	.	.	.	.	.	.	.	.	.	.	.	.	.	.	.	.	.	.	.	.	IncFIB(pKPHS1)/78.57/94.09/560	.	.	.	.
CP034047.1	-33.8289	29.7945	0.942158	1	n/a	15	.	.	.	.	.	.	.	.	.	.	.	.	.	.	.	.	.	.	.	.	.	.	.	.	.	.	.	.	.	.	.	.	.	.	.	.	.	.	IncFIB(pKPHS1)/78.57/94.09/560	.	.	.	.
CP032225.1	-30.4814	28.5424	1	1	n/a	147	.	.	.	.	.	.	.	.	.	.	.	.	.	.	.	.	.	.	.	.	.	.	.	.	.	.	.	.	.	.	.	.	.	.	.	.	.	.	IncFIB(pKPHS1)/100/99.82/560	.	.	.	.
CP032187.1	-30.8175	30.113	0.985391	1	n/a	16	.	.	.	.	.	.	.	.	.	.	.	.	.	.	.	.	.	.	.	.	.	.	.	.	.	.	.	.	.	.	.	.	.	.	.	.	.	.	IncFIB(pKPHS1)/100/99.82/560	.	.	.	.
CP031803.1	-30.4064	29.6515	1	1	n/a	231	.	.	.	.	.	.	.	.	.	.	.	.	.	.	.	.	.	.	.	.	.	.	.	.	.	.	.	.	.	.	.	.	.	.	.	.	.	.	IncFIB(pKPHS1)/78.57/99.77/560	.	.	.	.
CP031791.1	-29.6399	29.8387	0.992072	1	n/a	661	.	.	.	.	.	.	.	.	.	.	.	.	.	.	.	.	.	.	.	.	.	.	.	.	.	.	.	.	.	.	.	.	.	.	.	.	.	.	IncFIB(pKPHS1)/78.57/97.95/560	.	.	.	.
CP030322.1	-29.3204	28.9192	0.995402	1	n/a	412	.	.	.	.	.	.	.	.	.	.	.	.	.	.	.	.	.	.	.	.	.	.	.	.	.	.	.	.	.	.	.	.	.	.	.	.	.	.	IncFIB(pKPHS1)/100/95.89/560	.	.	.	.
CP030306.1	-30.6021	28.0321	0.989383	1	n/a	290	.	.	.	.	.	.	.	.	.	.	.	.	.	.	.	.	.	.	.	.	.	.	.	.	.	.	.	.	.	.	.	.	.	.	.	.	.	.	IncFIB(pKPHS1)/100/95.54/560	.	.	.	.
CP030268.1	-33.2588	28.867	0.942158	1	n/a	1660	.	.	.	.	.	.	.	.	.	.	.	.	.	.	.	.	.	.	.	.	.	.	.	.	.	.	.	.	.	.	.	.	.	.	.	.	.	.	IncFIB(pKPHS1)/100/95.71/560	.	.	.	.
CP028997.1	-29.5901	29.8272	0.975684	1	n/a	11	.	.	.	.	.	.	.	.	.	.	.	.	.	.	.	.	.	.	.	.	.	.	.	.	.	.	.	.	.	.	.	.	.	.	.	.	.	.	IncFIB(pKPHS1)/100/98.21/560	.	.	.	.
CP028544.1	-33.992	28.8128	0.942158	1	n/a	11	.	.	.	.	.	.	.	.	.	.	.	.	.	.	.	.	.	.	.	.	.	.	.	.	.	.	.	.	.	.	.	.	.	.	.	.	.	.	IncFIB(pKPHS1)/78.57/94.09/560	.	.	.	.
CP027155.1	-30.7396	26.4758	0.520855	1	n/a	258	.	.	.	.	.	.	.	.	.	.	.	.	.	.	.	.	.	.	.	.	.	.	.	.	.	.	.	.	.	.	.	.	.	.	.	.	.	.	.	.	.	.	.
CP027153.1	-32.5878	32.4808	0.42153	1	n/a	258	.	.	.	.	.	.	.	.	.	.	.	.	.	.	.	.	.	.	.	.	.	.	.	.	.	.	.	.	.	.	.	.	.	.	.	.	.	.	.	.	.	.	.
CP027147.1	-31.3493	32.9241	0.38597	1	n/a	258	.	.	.	.	.	.	.	.	.	.	.	.	.	.	.	.	.	.	.	.	.	.	.	.	.	.	.	.	.	.	.	.	.	.	.	.	.	.	.	.	.	.	.
CP027045.1	-30.4816	28.544	1	1	n/a	147	.	.	.	.	.	.	.	.	.	.	.	.	.	.	.	.	.	.	.	.	.	.	.	.	.	.	.	.	.	.	.	.	.	.	.	.	.	.	IncFIB(pKPHS1)/100/99.82/560	.	.	.	.
CP026165.1	-31.499	28.6065	0.96045	1	n/a	3685	.	.	.	.	.	.	.	.	.	.	.	.	.	.	.	.	.	.	.	.	.	.	.	.	.	.	.	.	.	.	.	.	.	.	.	.	.	.	IncFIB(pKPHS1)/100/95.54/560	.	.	.	.
CP026150.1	-34.1915	28.7573	0.870322	1	n/a	11	.	.	.	.	.	.	.	.	.	.	.	.	.	.	.	.	.	.	.	.	.	.	.	.	.	.	.	.	.	.	.	.	.	.	.	.	.	.	IncFIB(pKPHS1)/100/95.18/560	.	.	.	.
CP026146.1	-34.3049	28.7303	0.805136	1	n/a	3684	.	.	.	.	.	.	.	.	.	.	.	.	.	.	.	.	.	.	.	.	.	.	.	.	.	.	.	.	.	.	.	.	.	.	.	.	.	.	IncFIB(pKPHS1)/100/95.18/560	.	.	.	.
CP026138.1	-34.3085	28.7333	0.802657	1	n/a	11	.	.	.	.	.	.	.	.	.	.	.	.	.	.	.	.	.	.	.	.	.	.	.	.	.	.	.	.	.	.	.	.	.	.	.	.	.	.	IncFIB(pKPHS1)/100/95.18/560	.	.	.	.
CP026134.1	-34.1721	28.7594	0.883781	1	n/a	11	.	.	.	.	.	.	.	.	.	.	.	.	.	.	.	.	.	.	.	.	.	.	.	.	.	.	.	.	.	.	.	.	.	.	.	.	.	.	IncFIB(pKPHS1)/100/95.18/560	.	.	.	.
CP025467.1	-31.4029	32.0403	0.524587	1	n/a	11	.	.	.	.	.	CTX-M-1-like	.	.	.	.	.	.	.	.	.	.	.	SHV-like	.	.	.	.	.	.	.	.	.	.	.	.	.	.	.	.	.	.	.	blaSHV-12	IncFIB(pKPHS1)/100/100/560	.	.	.	.
CP024877.1	-29.3345	29.866	0.908963	1	n/a	15	.	.	.	.	.	.	.	.	.	.	.	.	.	.	.	.	.	.	.	.	.	.	.	.	.	.	.	.	.	.	.	.	.	.	.	.	.	.	IncFIB(pKPHS1)/100/97.32/560	.	.	.	.
CP024460.1	-31.6373	28.9713	0.853449	1	n/a	45	.	.	.	.	.	.	.	.	.	.	.	.	.	.	.	.	.	.	.	.	.	.	.	.	.	.	.	.	.	.	.	.	.	.	.	.	.	.	IncFIB(pKPHS1)/100/97.5/560	.	.	.	.
CP022128.1	-33.9703	27.8458	0.776887	1	n/a	15	.	.	.	.	.	.	.	.	.	.	.	.	.	.	.	.	.	.	.	.	.	.	.	.	.	.	.	.	.	.	.	.	.	.	.	.	.	.	IncFIB(pKPHS1)/100/99.82/560	.	.	.	.
CP021962.1	-31.3645	31.3018	0.640845	1	n/a	37	.	.	.	.	.	.	.	.	.	.	.	NDM-like	.	.	.	.	.	.	.	.	.	.	.	.	.	.	blaNDM-1	.	.	.	.	.	.	.	.	.	.	.	IncFIB(pKPHS1)/100/100/560	.	.	.	.
CP021945.1	-32.4129	27.3068	0.666714	1	n/a	147	.	.	.	.	.	.	.	.	.	.	.	.	.	.	.	.	.	.	.	.	.	.	.	.	.	.	.	.	.	.	.	.	.	.	.	.	.	.	IncFIB(pKPHS1)/100/95.54/560	.	.	.	.
CP021940.1	-32.4161	27.3121	0.669331	1	n/a	147	.	.	.	.	.	.	.	.	.	.	.	.	.	.	.	.	.	.	.	.	.	.	.	.	.	.	.	.	.	.	.	.	.	.	.	.	.	.	IncFIB(pKPHS1)/100/95.54/560	.	.	.	.
CP021714.1	-28.996	28.1123	0.643851	1	n/a	258	.	.	.	.	.	.	.	.	.	.	.	.	.	.	.	.	.	.	.	.	.	.	.	.	.	.	.	.	.	.	.	.	.	.	.	.	.	.	IncFIB(pKPHS1)/100/96.25/560	.	.	.	.
CP020063.1	-30.5181	27.7386	0.867806	1	n/a	234	.	.	.	.	.	.	.	.	.	.	.	.	.	.	.	.	.	.	.	.	.	.	.	.	.	.	.	.	.	.	.	.	.	.	.	.	.	.	IncFIB(pKPHS1)/100/95.54/560	.	.	.	.
CP019050.1	-32.6739	27.7123	0.814166	1	n/a	23	.	.	.	.	.	.	.	.	.	.	.	.	.	.	.	.	.	.	.	.	.	.	.	.	.	.	.	.	.	.	.	.	.	.	.	.	.	.	IncFIB(pKPHS1)/100/95.54/560	.	.	.	.
CP017778.1	-28.363	30.9036	1	1	n/a	15	.	.	.	.	.	.	.	.	.	.	.	.	.	.	.	.	.	.	.	.	.	.	.	.	.	.	.	.	.	.	.	.	.	.	.	.	.	.	IncA/C2/100/100/417	IncFIB(pKPHS1)/100/98.39/560	.	.	.
CP017387.1	-28.4165	30.8857	0.60003	1	n/a	15	.	.	.	.	.	.	.	.	.	.	.	.	.	.	.	.	.	.	.	.	.	.	.	.	.	.	.	.	.	.	.	.	.	.	.	.	.	.	IncA/C2/100/100/417	IncFIB(pKPHS1)/100/98.39/560	.	.	.
CP016924.1	-30.7953	30.0775	1	1	n/a	14	.	.	.	.	.	.	.	.	.	.	.	.	.	.	.	.	.	.	.	.	.	.	.	.	.	.	.	.	.	.	.	.	.	.	.	.	.	.	IncFIB(pKPHS1)/100/99.82/560	.	.	.	.
CP016161.1	-30.5493	28.1215	0.988246	1	n/a	1536	.	.	.	.	.	.	.	.	.	.	.	.	.	.	.	.	.	.	.	.	.	.	.	.	.	.	.	.	.	.	.	.	.	.	.	.	.	.	IncFIB(pKPHS1)/100/97.14/560	.	.	.	.
CP015755.1	-30.5494	28.1195	0.987467	1	n/a	1536	.	.	.	.	.	.	.	.	.	.	.	.	.	.	.	.	.	.	.	.	.	.	.	.	.	.	.	.	.	.	.	.	.	.	.	.	.	.	IncFIB(pKPHS1)/100/97.14/560	.	.	.	.
CP014756.1	-32.4428	27.2122	0.637933	1	n/a	147	.	.	.	.	.	.	.	.	.	.	.	.	.	.	.	.	.	.	.	.	.	.	.	.	.	.	.	.	.	.	.	.	.	.	.	.	.	.	IncFIB(pKPHS1)/100/95.54/560	.	.	.	.
CP012570.1	-30.8279	30.1794	1	1	n/a	16	.	.	.	.	.	.	.	.	.	.	.	.	.	.	.	.	.	.	.	.	.	.	.	.	.	.	.	.	.	.	.	.	.	.	.	.	.	.	IncFIB(pKPHS1)/100/99.82/560	.	.	.	.
CP012565.1	-30.8161	30.1063	0.990834	1	n/a	16	.	.	.	.	.	.	.	.	.	.	.	.	.	.	.	.	.	.	.	.	.	.	.	.	.	.	.	.	.	.	.	.	.	.	.	.	.	.	IncFIB(pKPHS1)/100/99.82/560	.	.	.	.
CP012427.1	-33.0074	28.5577	0.89156	1	n/a	147	.	.	.	.	.	.	.	.	.	.	.	.	.	.	.	.	.	.	.	.	.	.	.	.	.	.	.	.	.	.	.	.	.	.	.	.	.	.	IncFIB(pKPHS1)/100/98.57/560	.	.	.	.
CP008931.1	-33.9684	27.8461	0.777816	1	n/a	15	.	.	.	.	.	.	.	.	.	.	.	.	.	.	.	.	.	.	.	.	.	.	.	.	.	.	.	.	.	.	.	.	.	.	.	.	.	.	IncFIB(pKPHS1)/100/99.82/560	.	.	.	.
CP003223.1	-31.3627	31.5398	0.622636	1	n/a	11	.	.	.	.	.	.	.	.	.	CTX-M-9-like	.	.	.	.	.	.	.	.	.	blaCTX-M-14	.	.	.	.	.	.	.	.	.	.	.	.	.	.	.	.	.	.	IncFIB(pKPHS1)/100/100/560	.	.	.	.
AP024574.1	-29.6881	31.0767	1	1	n/a	628	.	.	.	.	.	.	.	.	.	.	.	.	.	.	.	.	.	.	.	.	.	.	.	.	.	.	.	.	.	.	.	.	.	.	.	.	.	.	IncFIB(pKPHS1)/78.57/99.77/560	.	.	.	.
AP023149.1	-31.9343	28.0321	0.919595	1	n/a	967	.	.	.	.	.	.	.	.	.	.	.	.	.	.	.	.	.	.	.	.	.	.	.	.	.	.	.	.	.	.	.	.	.	.	.	.	.	.	IncFIB(pKPHS1)/78.57/94.09/560	.	.	.	.
908247_p1	-9.66918	52.2271	1	2	Georgia	395	iucA	.	rmpA	rmpA2	peg344	.	.	.	.	.	.	NDM-like	.	.	.	.	.	.	.	.	.	.	.	.	.	.	blaNDM-1	.	.	.	.	.	.	.	.	.	.	.	IncFIB(Mar)/100/99.54/439	IncHI1B/100/99.47/570	.	.	.
102622_p1	-9.86231	52.348	1	2	Georgia	395	iucA	.	rmpA	rmpA2	peg344	.	.	.	.	.	.	.	.	.	.	.	.	.	.	.	.	.	.	.	.	.	.	.	.	.	.	.	.	.	.	.	.	.	IncFIB(Mar)/100/99.54/439	IncHI1B/100/99.47/570	.	.	.
1005401_p1	-9.9021	52.3579	1	2	Georgia	395	iucA	.	rmpA	rmpA2	peg344	.	.	.	.	.	.	.	.	OXA-1-like	.	.	.	.	.	.	.	.	.	.	.	.	.	blaOXA-1	.	.	.	.	.	.	.	.	.	.	IncFIB(Mar)/100/99.54/439	IncHI1B/100/99.47/570	.	.	.
804398_p1	-10.5095	51.3426	1	2	Georgia	48	iucA	.	.	rmpA2	.	.	.	.	.	.	.	.	.	.	.	.	.	SHV-like	.	.	.	.	.	.	.	.	.	.	.	.	.	.	blaSHV-1	.	.	.	.	.	IncHI1B/100/99.82/570	IncFIB(Mar)/100/99.54/439	.	.	.
803958_p1	-10.4786	51.3419	1	2	Georgia	395	iucA	.	.	rmpA2	.	.	.	.	.	.	.	.	.	.	.	.	.	.	.	.	.	.	.	.	.	.	.	.	.	.	.	.	.	.	.	.	.	.	IncHI1B/100/99.82/570	IncFIB(Mar)/100/99.54/439	.	.	.
1005637_p1	-11.008	51.8282	1	2	Georgia	395	iucA	.	.	rmpA2	.	CTX-M-1-like	.	.	.	.	.	.	.	OXA-1-like	.	.	.	.	blaCTX-M-15	.	.	.	.	.	.	.	.	blaOXA-1	.	.	.	.	.	.	.	.	.	.	IncHI1B/100/99.82/570	IncR/100/100/251	.	.	.
1004755_p1	-10.4947	51.2739	1	2	Georgia	15	iucA	.	.	rmpA2	.	.	.	.	.	.	.	.	.	.	.	.	.	.	.	.	.	.	.	.	.	.	.	.	.	.	.	.	.	.	.	.	.	.	IncFIB(Mar)/100/99.54/439	IncHI1B/100/99.82/570	.	.	.
908553_p1	-11.3971	47.1503	0.818485	2	Georgia	395	.	.	.	.	.	.	.	.	.	.	.	NDM-like	.	.	.	.	.	.	.	.	.	.	.	.	.	.	.	.	.	.	.	.	.	.	.	.	.	.	IncHI1B/100/99.82/570	IncFIB(Mar)/100/99.32/439	.	.	.
908343_p1	-11.4935	47.1267	1	2	Georgia	23	.	.	.	.	.	.	.	.	.	.	.	NDM-like	.	.	.	.	.	.	.	.	.	.	.	.	.	.	.	.	.	.	.	.	.	.	.	.	.	.	IncHI1B/100/99.82/570	IncFIB(Mar)/100/99.32/439	.	.	.
1005419_p1	-11.3999	47.1457	0.817801	2	Georgia	395	.	.	.	.	.	.	.	.	.	.	.	NDM-like	.	.	.	.	.	.	.	.	.	.	.	.	.	.	.	.	.	.	.	.	.	.	.	.	.	.	IncHI1B/100/99.82/570	IncFIB(Mar)/100/99.32/439	.	.	.
516343_p1	-8.86317	53.0753	1	2	Jordan	307	iucA	.	.	rmpA2	.	.	.	.	.	.	.	.	.	.	.	.	.	.	.	.	.	.	.	.	.	.	.	.	.	.	.	.	.	.	.	.	.	.	IncFIB(Mar)/100/100/439	IncHI1B/100/99.47/570	.	.	.
875282_p1	-8.66658	49.1753	1	2	Jordan	147	.	.	.	.	.	.	.	.	.	.	.	NDM-like	.	OXA-1-like	.	.	.	.	.	.	.	.	.	.	.	.	blaNDM-1	blaOXA-1	.	.	.	.	.	.	.	.	.	.	IncFIB(Mar)/100/99.77/439	IncHI1B/100/99.47/570	.	.	.
102024_p1	-8.91637	52.0021	1	2	Kenya	218	iucA	iroB	rmpA	rmpA2	peg344	CTX-M-1-like	.	.	.	.	.	.	.	.	.	.	.	.	blaCTX-M-15	.	.	.	.	.	.	.	.	.	.	.	.	.	.	.	.	.	.	.	IncQ1/66.46/100/796	IncFIB(Mar)/100/99.32/439	IncHI1B/100/100/570	.	.
977691_p1	-8.66033	48.3965	1	2	Thailand	17	.	.	.	.	.	.	.	.	CTX-M-8-like	.	.	.	.	.	.	.	.	.	.	.	.	.	.	.	.	.	.	.	.	.	.	.	.	.	.	.	.	.	IncHI1B/100/99.47/570	IncFIB(Mar)/100/99.54/439	.	.	.
821202_p1	-9.34847	52.1578	1	2	Ukraine	395	iucA	.	rmpA	rmpA2	peg344	.	.	.	.	.	.	.	.	.	.	.	.	.	.	.	.	.	.	.	.	.	.	.	.	.	.	.	.	.	.	.	.	.	IncHI1B/100/99.47/570	IncFIB(Mar)/100/99.54/439	.	.	.
489775_p1	-10.4612	51.3545	1	2	Ukraine	392	iucA	.	.	rmpA2	.	.	.	.	.	.	.	.	.	.	.	.	.	.	.	.	.	.	.	.	.	.	.	.	.	.	.	.	.	.	.	.	.	.	IncHI1B/100/99.82/570	IncFIB(Mar)/100/99.54/439	.	.	.
740859_p1	-10.3015	46.4138	1	2	Ukraine	23	.	.	.	.	.	.	.	.	.	.	.	.	.	.	.	.	.	.	.	.	.	.	.	.	.	.	.	.	.	.	.	.	.	.	.	.	.	.	IncFIB(Mar)/100/99.54/439	.	.	.	.
13810_p1	-7.83843	52.8591	1	2	United States	490	iucA	.	.	rmpA2	.	.	.	.	.	.	.	.	.	.	.	.	.	.	.	.	.	.	.	.	.	.	.	.	.	.	.	.	.	.	.	.	.	.	IncFIB(Mar)/100/100/439	IncHI1B/100/99.47/570	.	.	.
12964_p1	-7.88432	52.8182	1	2	United States	490	iucA	.	.	rmpA2	.	.	.	.	.	.	.	.	.	.	.	.	.	.	.	.	.	.	.	.	.	.	.	.	.	.	.	.	.	.	.	.	.	.	IncFIB(Mar)/100/100/439	IncHI1B/100/99.47/570	.	.	.
CP091814.1	-9.59341	52.403	1	2	n/a	383	iucA	.	rmpA	rmpA2	peg344	CTX-M-1-like	.	.	.	.	.	NDM-like	.	.	.	.	OXA-9-like	.	blaCTX-M-15	.	.	.	.	.	.	.	.	.	.	.	.	.	.	.	.	.	.	.	IncFIB(Mar)/100/99.54/439	IncHI1B/100/99.47/570	.	.	.
CP084985.1	-9.72522	52.5042	1	2	n/a	147	iucA	.	rmpA	rmpA2	peg344	CTX-M-1-like	.	.	.	.	.	.	.	.	.	.	OXA-9-like	.	blaCTX-M-15	.	.	.	.	.	.	.	.	.	.	.	.	blaOXA-9	.	.	.	.	.	.	IncFIB(Mar)/100/99.54/439	IncHI1B/100/99.47/570	IncR/100/100/251	.	.
CP084395.1	-9.54697	52.3771	1	2	n/a	147	iucA	.	rmpA	rmpA2	peg344	CTX-M-1-like	.	.	.	.	.	NDM-like	.	.	.	.	.	.	blaCTX-M-15	.	.	.	.	.	.	.	blaNDM-1	.	.	.	.	.	.	.	.	.	.	.	IncFIB(Mar)/100/99.54/439	IncHI1B/100/99.47/570	.	.	.
CP077784.1	-9.5026	52.3317	1	2	n/a	377	iucA	.	rmpA	rmpA2	peg344	.	.	.	.	.	.	NDM-like	.	.	.	.	.	.	.	.	.	.	.	.	.	.	blaNDM-1	.	.	.	.	.	.	.	.	.	.	.	IncFIB(Mar)/100/99.54/439	IncHI1B/100/99.47/570	.	.	.
CP074088.1	-9.53504	52.3698	1	2	n/a	147	iucA	.	rmpA	rmpA2	peg344	CTX-M-1-like	.	.	.	.	.	.	.	.	.	.	.	.	blaCTX-M-15	.	.	.	.	.	.	.	.	.	.	.	.	.	.	.	.	.	.	.	IncFIB(Mar)/100/99.54/439	IncHI1B/100/99.47/570	.	.	.
CP071028.1	-9.51255	52.3544	1	2	n/a	147	iucA	.	rmpA	rmpA2	peg344	CTX-M-1-like	.	.	.	.	.	.	.	.	.	.	.	.	blaCTX-M-15	.	.	.	.	.	.	.	.	.	.	.	.	.	.	.	.	.	.	.	IncFIB(Mar)/100/99.54/439	IncHI1B/100/99.47/570	.	.	.
CP070891.1	-9.51746	52.3605	1	2	n/a	147	iucA	.	rmpA	rmpA2	peg344	CTX-M-1-like	.	.	.	.	.	.	.	.	.	.	.	.	blaCTX-M-15	.	.	.	.	.	.	.	.	.	.	.	.	.	.	.	.	.	.	.	IncFIB(Mar)/100/99.54/439	IncHI1B/100/99.47/570	.	.	.
CP068690.1	-7.97264	51.5789	1	2	n/a	11	iucA	.	rmpA	rmpA2	.	.	.	.	.	.	.	.	.	.	.	.	.	.	.	.	.	.	.	.	.	.	.	.	.	.	.	.	.	.	.	.	.	.	IncFIB(Mar)/100/100/439	.	.	.	.
CP061977.1	-9.9112	53.8162	1	2	n/a	147	iucA	.	rmpA	rmpA2	.	.	.	.	.	.	.	.	.	.	.	.	.	.	.	.	.	.	.	.	.	.	.	.	.	.	.	.	.	.	.	.	.	.	IncFIB(Mar)/100/99.32/439	IncHI1B/100/99.47/570	.	.	.
CP061949.1	-9.68123	53.4022	1	2	n/a	383	iucA	.	rmpA	rmpA2	.	.	.	.	.	.	.	.	.	.	.	.	.	.	.	.	.	.	.	.	.	.	.	.	.	.	.	.	.	.	.	.	.	.	IncHI1B/100/99.47/570	IncFIB(Mar)/100/99.32/439	.	.	.
CP050380.1	-9.51315	52.3813	1	2	n/a	15	iucA	.	rmpA	rmpA2	peg344	.	.	.	.	.	.	NDM-like	.	.	.	.	.	.	.	.	.	.	.	.	.	.	blaNDM-1	.	.	.	.	.	.	.	.	.	.	.	IncHI1B/100/99.47/570	IncFIB(Mar)/100/99.54/439	.	.	.
CP046887.1	-1.18489	45.2226	0.345214	2	n/a	11	iucA	iroB	rmpA	rmpA2	peg344	.	.	.	.	.	.	.	.	.	.	.	.	.	.	.	.	.	.	.	.	.	.	.	.	.	.	.	.	.	.	.	.	.	IncFIB(Mar)/100/95.22/439	.	.	.	.
CP040726.1	-9.51025	52.3476	1	2	n/a	147	iucA	.	rmpA	rmpA2	peg344	CTX-M-1-like	.	.	.	.	.	.	.	.	.	.	.	.	blaCTX-M-15	.	.	.	.	.	.	.	.	.	.	.	.	.	.	.	.	.	.	.	IncFIB(Mar)/100/99.54/439	IncHI1B/100/99.47/570	.	.	.
CP034201.2	-9.5975	52.4129	1	2	n/a	383	iucA	.	rmpA	rmpA2	peg344	CTX-M-1-like	.	.	.	.	.	NDM-like	.	.	.	.	OXA-9-like	.	blaCTX-M-15	.	.	.	.	.	.	.	.	.	.	.	.	.	.	.	.	.	.	.	IncFIB(Mar)/100/99.54/439	IncHI1B/100/99.47/570	.	.	.
CP023723.1	-8.61798	51.695	1	2	n/a	11	iucA	iroB	rmpA	rmpA2	peg344	.	.	.	.	.	.	.	.	.	.	.	.	.	.	.	.	.	.	.	.	.	.	.	.	.	.	.	.	.	.	.	.	.	IncHI1B/100/100/570	IncFIB(Mar)/100/99.32/439	.	.	.
CP117746.1	-9.81461	52.5032	1	2	n/a	147	iucA	.	.	rmpA2	.	CTX-M-1-like	.	.	.	.	.	NDM-like	.	.	.	.	OXA-9-like	.	.	.	.	.	.	.	.	.	.	.	.	.	.	blaOXA-9	.	.	.	.	.	.	IncR/100/100/251	IncFIB(Mar)/100/99.54/439	IncHI1B/100/99.47/570	.	.
CP117741.1	-9.58008	52.3566	1	2	n/a	147	iucA	.	.	rmpA2	.	CTX-M-1-like	.	.	.	.	.	NDM-like	.	.	.	.	.	.	.	.	.	.	.	.	.	.	.	.	.	.	.	.	.	.	.	.	.	.	IncFIB(Mar)/100/99.54/439	IncHI1B/100/99.47/570	.	.	.
CP109984.1	-6.59046	51.8509	0.895633	2	n/a	15	iucA	.	.	rmpA2	.	.	.	.	.	.	.	.	.	.	.	.	.	.	.	.	.	.	.	.	.	.	.	.	.	.	.	.	.	.	.	.	.	.	IncHI1B/99.82/100/570	IncFIB(Mar)/100/100/439	.	.	.
CP099523.1	-6.50237	51.9497	0.9038	2	n/a	11	iucA	.	.	rmpA2	.	.	.	.	.	.	.	.	.	.	.	.	.	SHV-like	.	.	.	.	.	.	.	.	.	.	.	.	.	.	.	.	.	.	.	blaSHV-12	IncHI1B/99.82/100/570	IncFIB(Mar)/100/100/439	.	.	.
CP097690.1	-7.30114	51.4774	1	2	n/a	11	iucA	.	.	rmpA2	.	.	.	.	.	.	.	.	.	OXA-1-like	.	.	.	.	.	.	.	.	.	.	.	.	.	blaOXA-1	.	.	.	.	.	.	.	.	.	.	.	.	.	.	.
CP094992.1	-10.6927	51.5191	1	2	n/a	39	iucA	.	.	rmpA2	.	CTX-M-1-like	.	.	.	.	.	.	.	OXA-1-like	.	OXA-48-like	.	.	blaCTX-M-15	.	.	.	.	.	.	.	.	blaOXA-1	.	.	.	.	.	.	.	.	.	.	IncHI1B/100/99.82/570	.	.	.	.
CP094368.3	-10.6885	51.5145	1	2	n/a	39	iucA	.	.	rmpA2	.	CTX-M-1-like	.	.	.	.	.	.	.	OXA-1-like	.	OXA-48-like	.	.	blaCTX-M-15	.	.	.	.	.	.	.	.	blaOXA-1	.	.	.	.	.	.	.	.	.	.	IncHI1B/100/99.82/570	.	.	.	.
CP094228.1	-6.03562	50.5851	1	2	n/a	2096	iucA	.	.	rmpA2	.	CTX-M-1-like	.	.	.	.	.	.	.	OXA-1-like	.	OXA-48-like	.	.	blaCTX-M-15	.	.	.	.	.	.	.	.	blaOXA-1	.	.	blaOXA-232	.	.	.	.	.	.	.	IncFIB(Mar)/100/99.54/439	ColKP3/100/100/280	Col440I/100/92.11/114	IncHI1B/100/100/570	.
CP093855.1	-6.01556	50.5864	1	2	n/a	2096	iucA	.	.	rmpA2	.	CTX-M-1-like	.	.	.	.	.	.	.	OXA-1-like	.	OXA-48-like	.	.	blaCTX-M-15	.	.	.	.	.	.	.	.	blaOXA-1	.	.	blaOXA-232	.	.	.	.	.	.	.	IncFIB(Mar)/100/99.54/439	ColKP3/100/100/280	ColRNAI/100/96.95/130	Col440I/100/92.11/114	IncHI1B/100/100/570
CP093853.1	-6.02043	50.6184	1	2	n/a	2096	iucA	.	.	rmpA2	.	CTX-M-1-like	.	.	.	.	.	.	.	OXA-1-like	.	OXA-48-like	.	.	blaCTX-M-15	.	.	.	.	.	.	.	.	blaOXA-1	.	.	blaOXA-232	.	.	.	.	.	.	.	IncFIB(Mar)/100/99.54/439	ColKP3/100/100/280	ColRNAI/100/96.95/130	Col440I/100/92.11/114	.
CP089011.1	-10.5296	51.3621	1	2	n/a	147	iucA	.	.	rmpA2	.	.	.	.	.	.	.	.	.	.	.	.	.	.	.	.	.	.	.	.	.	.	.	.	.	.	.	.	.	.	.	.	.	.	IncHI1B/100/99.82/570	.	.	.	.
CP087612.1	-6.59881	51.8735	0.887409	2	n/a	15	iucA	.	.	rmpA2	.	.	.	.	.	.	.	.	.	.	.	.	.	SHV-like	.	.	.	.	.	.	.	.	.	.	.	.	.	.	.	.	.	.	blaSHV-11	.	IncHI1B/99.82/100/570	IncFIB(Mar)/100/100/439	.	.	.
CP086672.1	-10.69	51.5173	1	2	n/a	39	iucA	.	.	rmpA2	.	CTX-M-1-like	.	.	.	.	.	.	.	OXA-1-like	.	OXA-48-like	.	.	blaCTX-M-15	.	.	.	.	.	.	.	.	blaOXA-1	.	.	.	.	.	.	.	.	.	.	IncHI1B/100/99.82/570	.	.	.	.
CP086665.1	-10.713	51.5178	1	2	n/a	39	iucA	.	.	rmpA2	.	CTX-M-1-like	.	.	.	.	.	.	.	OXA-1-like	.	OXA-48-like	.	.	blaCTX-M-15	.	.	.	.	.	.	.	.	blaOXA-1	.	.	.	.	.	.	.	.	.	.	IncHI1B/100/99.82/570	.	.	.	.
CP084493.1	-6.51961	51.9156	0.901487	2	n/a	11	iucA	.	.	rmpA2	.	.	.	.	.	.	.	.	.	.	.	.	.	.	.	.	.	.	.	.	.	.	.	.	.	.	.	.	.	.	.	.	.	.	IncHI1B/99.82/100/570	IncFIB(Mar)/100/100/439	.	.	.
CP083933.1	-4.857	50.8652	0.97998	2	n/a	2096	iucA	.	.	rmpA2	.	CTX-M-1-like	.	.	.	.	.	.	.	OXA-1-like	.	.	.	.	blaCTX-M-15	.	.	.	.	.	.	.	.	blaOXA-1	.	.	.	.	.	.	.	.	.	.	IncFIB(K)/100/100/560	IncFIB(Mar)/100/99.54/439	IncHI1B/100/100/570	.	.
CP068685.1	-7.82179	51.3926	1	2	n/a	11	iucA	.	.	rmpA2	.	.	.	.	.	.	.	.	.	.	.	.	.	.	.	.	.	.	.	.	.	.	.	.	.	.	.	.	.	.	.	.	.	.	IncFIB(Mar)/100/100/439	.	.	.	.
CP066911.1	-6.51345	51.9411	0.90421	2	n/a	11	iucA	.	.	rmpA2	.	.	.	.	.	.	.	.	.	.	.	.	.	SHV-like	.	.	.	.	.	.	.	.	.	.	.	.	.	.	.	.	.	.	.	blaSHV-12	IncFIB(Mar)/100/100/439	IncHI1B/99.82/100/570	.	.	.
CP062994.1	-10.6426	51.3912	1	2	n/a	336	iucA	.	.	rmpA2	.	.	.	.	.	.	.	.	.	.	.	OXA-48-like	.	.	.	.	.	.	.	.	.	.	.	.	.	.	.	.	.	.	.	.	.	.	IncHI1B/100/99.82/570	.	.	.	.
CP061962.1	-10.4618	51.3583	1	2	n/a	395	iucA	.	.	rmpA2	.	.	.	.	.	.	.	.	.	.	.	.	.	SHV-like	.	.	.	.	.	.	.	.	.	.	.	.	.	.	.	blaSHV-2	.	.	.	.	IncHI1B/100/99.82/570	IncFIB(Mar)/100/99.54/439	.	.	.
CP058799.1	-6.13935	50.5782	1	2	n/a	2096	iucA	.	.	rmpA2	.	CTX-M-1-like	.	.	.	.	.	.	.	.	.	.	.	.	blaCTX-M-15	.	.	.	.	.	.	.	.	.	.	.	.	.	.	.	.	.	.	.	IncHI1B/100/100/570	IncFIB(Mar)/100/99.54/439	.	.	.
CP053772.1	-6.05559	50.5366	1	2	n/a	2096	iucA	.	.	rmpA2	.	CTX-M-1-like	.	.	.	.	.	.	.	OXA-1-like	.	.	.	.	blaCTX-M-15	.	.	.	.	.	.	.	.	.	.	.	.	.	.	.	.	.	.	.	IncHI1B/100/100/570	IncFIB(Mar)/100/99.54/439	.	.	.
CP053766.1	-6.13402	50.5696	1	2	n/a	2096	iucA	.	.	rmpA2	.	CTX-M-1-like	.	.	.	.	.	.	.	.	.	.	.	.	blaCTX-M-15	.	.	.	.	.	.	.	.	.	.	.	.	.	.	.	.	.	.	.	IncHI1B/100/100/570	IncFIB(Mar)/100/99.54/439	.	.	.
CP052236.1	-9.68633	51.1955	1	2	n/a	307	iucA	.	.	rmpA2	.	.	.	.	.	.	.	.	.	OXA-1-like	.	.	.	.	.	.	.	.	.	.	.	.	.	.	.	.	.	.	.	.	.	.	.	.	IncHI1B/100/100/570	.	.	.	.
CP047701.1	-9.65698	53.5374	1	2	n/a	376	iucA	.	.	rmpA2	.	.	.	.	.	.	.	.	.	.	.	.	.	SHV-like	.	.	.	.	.	.	.	.	.	.	.	.	.	.	blaSHV-1	.	.	.	.	.	IncHI1B/100/99.47/570	.	.	.	.
CP040834.1	-6.40605	51.97	0.872994	2	n/a	11	iucA	.	.	rmpA2	.	.	.	.	.	.	.	.	.	.	.	.	.	SHV-like	.	.	.	.	.	.	.	.	.	.	.	.	.	.	.	.	.	.	.	blaSHV-12	IncHI1B/99.82/100/570	IncFIB(Mar)/100/100/439	.	.	.
CP039526.1	-6.77358	52.0202	0.953634	2	n/a	11	iucA	.	.	rmpA2	.	.	.	.	.	.	.	.	.	.	.	.	.	SHV-like	.	.	.	.	.	.	.	.	.	.	.	.	.	.	.	.	.	.	blaSHV-11	.	IncFIB(Mar)/100/100/439	IncHI1B/99.82/100/570	.	.	.
CP034054.1	-8.47165	53.2422	1	2	n/a	15	iucA	.	.	rmpA2	.	.	.	.	.	.	.	.	.	.	.	.	.	.	.	.	.	.	.	.	.	.	.	.	.	.	.	.	.	.	.	.	.	.	IncFIB(Mar)/100/100/439	IncHI1B/100/99.47/570	.	.	.
CP034046.1	-8.86196	53.1592	1	2	n/a	15	iucA	.	.	rmpA2	.	CTX-M-1-like	.	.	.	.	.	.	.	.	.	.	.	SHV-like	blaCTX-M-15	.	.	.	.	.	.	.	.	.	.	.	.	.	.	.	blaSHV-5	.	.	.	IncFIB(Mar)/100/100/439	IncHI1B/100/99.47/570	.	.	.
CP030293.1	-6.63779	51.8118	0.900374	2	n/a	11	iucA	.	.	rmpA2	.	.	.	.	.	.	.	.	.	.	.	.	.	.	.	.	.	.	.	.	.	.	.	.	.	.	.	.	.	.	.	.	.	.	IncHI1B/99.82/100/570	IncFIB(Mar)/100/100/439	.	.	.
CP028791.1	-7.19635	51.3491	0.923007	2	n/a	11	iucA	.	.	rmpA2	.	.	.	.	.	.	.	.	.	OXA-1-like	.	.	.	.	.	.	.	.	.	.	.	.	.	blaOXA-1	.	.	.	.	.	.	.	.	.	.	IncFIB(Mar)/100/99.77/439	.	.	.	.
CP025462.1	-6.44386	52.0214	0.898983	2	n/a	11	iucA	.	.	rmpA2	.	.	.	.	.	.	.	.	.	.	.	.	.	SHV-like	.	.	.	.	.	.	.	.	.	.	.	.	.	.	.	.	.	.	.	.	IncHI1B/99.82/100/570	IncFIB(Mar)/100/100/439	.	.	.
OX030749.1	-6.72212	44.4804	1	2	n/a	307	.	.	.	.	.	.	.	.	.	.	.	.	.	.	.	.	.	.	.	.	.	.	.	.	.	.	.	.	.	.	.	.	.	.	.	.	.	.	IncFIB(Mar)/100/99.77/439	.	.	.	.
OX030719.1	-6.73528	44.5711	1	2	n/a	307	.	.	.	.	.	.	.	.	.	.	.	.	.	.	.	.	.	.	.	.	.	.	.	.	.	.	.	.	.	.	.	.	.	.	.	.	.	.	IncFIB(Mar)/100/99.77/439	.	.	.	.
OX030709.1	-6.73605	44.5281	1	2	n/a	307	.	.	.	.	.	.	.	.	.	.	.	.	.	.	.	.	.	.	.	.	.	.	.	.	.	.	.	.	.	.	.	.	.	.	.	.	.	.	IncFIB(Mar)/100/99.77/439	.	.	.	.
OW970221.1	-6.67572	44.3541	1	2	n/a	1961	.	.	.	.	.	.	.	.	.	.	.	.	.	.	.	.	.	.	.	.	.	.	.	.	.	.	.	.	.	.	.	.	.	.	.	.	.	.	IncFIB(Mar)/100/99.77/439	.	.	.	.
OW969934.1	-6.69862	44.5266	1	2	n/a	147	.	.	.	.	.	.	.	.	.	.	.	.	.	.	.	.	.	.	.	.	.	.	.	.	.	.	.	.	.	.	.	.	.	.	.	.	.	.	IncFIB(Mar)/100/99.77/439	.	.	.	.
OW969858.1	-6.69585	44.3835	1	2	n/a	1961	.	.	.	.	.	.	.	.	.	.	.	.	.	.	.	.	.	.	.	.	.	.	.	.	.	.	.	.	.	.	.	.	.	.	.	.	.	.	IncFIB(Mar)/100/99.77/439	.	.	.	.
OW969840.1	-6.70779	44.419	1	2	n/a	307	.	.	.	.	.	.	.	.	.	.	.	.	.	.	.	.	.	.	.	.	.	.	.	.	.	.	.	.	.	.	.	.	.	.	.	.	.	.	IncFIB(Mar)/100/99.77/439	.	.	.	.
OW968459.1	-5.98815	44.4464	1	2	n/a	307	.	.	.	.	.	.	.	.	.	.	.	.	.	.	.	.	.	.	.	.	.	.	.	.	.	.	.	.	.	.	.	.	.	.	.	.	.	.	.	.	.	.	.
OW968454.1	-6.67581	44.3542	1	2	n/a	1961	.	.	.	.	.	.	.	.	.	.	.	.	.	.	.	.	.	.	.	.	.	.	.	.	.	.	.	.	.	.	.	.	.	.	.	.	.	.	IncFIB(Mar)/100/99.77/439	.	.	.	.
OW968436.1	-6.68636	44.4705	1	2	n/a	307	.	.	.	.	.	.	.	.	.	.	.	.	.	.	.	.	.	.	.	.	.	.	.	.	.	.	.	.	.	.	.	.	.	.	.	.	.	.	IncFIB(Mar)/100/99.77/439	.	.	.	.
OW968389.1	-7.08699	43.955	1	2	n/a	15	.	.	.	.	.	.	.	.	.	.	.	.	.	.	.	.	.	.	.	.	.	.	.	.	.	.	.	.	.	.	.	.	.	.	.	.	.	.	IncFIB(Mar)/100/99.77/439	.	.	.	.
OW968365.1	-6.73708	44.5385	1	2	n/a	307	.	.	.	.	.	.	.	.	.	.	.	.	.	.	.	.	.	.	.	.	.	.	.	.	.	.	.	.	.	.	.	.	.	.	.	.	.	.	IncFIB(Mar)/100/99.77/439	.	.	.	.
OW968267.1	-7.03574	43.9867	1	2	n/a	307	.	.	.	.	.	.	.	.	.	.	.	.	.	.	.	.	.	.	.	.	.	.	.	.	.	.	.	.	.	.	.	.	.	.	.	.	.	.	IncFIB(Mar)/100/99.77/439	.	.	.	.
OW968260.1	-6.2873	44.3386	1	2	n/a	307	.	.	.	.	.	.	.	.	.	.	.	.	.	.	.	.	.	.	.	.	.	.	.	.	.	.	.	.	.	.	.	.	.	.	.	.	.	.	.	.	.	.	.
OW968245.1	-6.69594	44.3825	1	2	n/a	1961	.	.	.	.	.	.	.	.	.	.	.	.	.	.	.	.	.	.	.	.	.	.	.	.	.	.	.	.	.	.	.	.	.	.	.	.	.	.	IncFIB(Mar)/100/99.77/439	.	.	.	.
OW968216.1	-6.71954	44.4357	1	2	n/a	5002	.	.	.	.	.	.	.	.	.	.	.	.	.	.	.	.	.	.	.	.	.	.	.	.	.	.	.	.	.	.	.	.	.	.	.	.	.	.	IncFIB(Mar)/100/99.77/439	.	.	.	.
OW968210.1	-6.80708	44.598	1	2	n/a	1961	.	.	.	.	.	.	.	.	.	.	.	.	.	.	.	.	.	.	.	.	.	.	.	.	.	.	.	.	.	.	.	.	.	.	.	.	.	.	IncFIB(Mar)/100/99.77/439	.	.	.	.
OW968204.1	-6.67805	44.4753	1	2	n/a	307	.	.	.	.	.	.	.	.	.	.	.	.	.	.	.	.	.	.	.	.	.	.	.	.	.	.	.	.	.	.	.	.	.	.	.	.	.	.	IncFIB(Mar)/100/99.77/439	.	.	.	.
OW968194.1	-6.93521	43.6439	1	2	n/a	1961	.	.	.	.	.	.	.	.	.	.	.	.	.	.	.	.	.	.	.	.	.	.	.	.	.	.	.	.	.	.	.	.	.	.	.	.	.	.	IncFIB(Mar)/100/99.77/439	.	.	.	.
OW967996.1	-7.08699	44.0985	1	2	n/a	392	.	.	.	.	.	.	.	.	.	.	.	.	.	.	.	.	.	.	.	.	.	.	.	.	.	.	.	.	.	.	.	.	.	.	.	.	.	.	IncFIB(Mar)/100/99.77/439	.	.	.	.
OW967777.1	-7.05556	44.1769	1	2	n/a	392	.	.	.	.	.	.	.	.	.	.	.	.	.	.	.	.	.	.	.	.	.	.	.	.	.	.	.	.	.	.	.	.	.	.	.	.	.	.	IncFIB(Mar)/100/99.77/439	.	.	.	.
OW967031.1	-9.50869	47.8774	1	2	n/a	405	.	.	.	.	.	.	.	.	.	.	.	.	.	.	.	.	.	.	.	.	.	.	.	.	.	.	.	.	.	.	.	.	.	.	.	.	.	.	IncFIB(Mar)/100/100/439	IncHI1B/100/99.47/570	.	.	.
OW849537.1	-6.70098	44.3929	1	2	n/a	1961	.	.	.	.	.	.	.	.	.	.	.	.	.	.	.	.	.	.	.	.	.	.	.	.	.	.	.	.	.	.	.	.	.	.	.	.	.	.	IncFIB(Mar)/100/99.77/439	.	.	.	.
OW849466.1	-6.70068	44.5339	1	2	n/a	147	.	.	.	.	.	.	.	.	.	.	.	.	.	.	.	.	.	.	.	.	.	.	.	.	.	.	.	.	.	.	.	.	.	.	.	.	.	.	IncFIB(Mar)/100/99.77/439	.	.	.	.
OW849427.1	-11.0638	47.0638	0.971102	2	n/a	437	.	.	.	.	.	.	.	.	.	.	.	.	.	.	.	.	.	.	.	.	.	.	.	.	.	.	.	.	.	.	.	.	.	.	.	.	.	.	IncHI1B/100/99.82/570	IncFIB(Mar)/100/99.54/439	.	.	.
OW849422.1	-6.68298	44.4541	1	2	n/a	307	.	.	.	.	.	.	.	.	.	.	.	.	.	.	.	.	.	.	.	.	.	.	.	.	.	.	.	.	.	.	.	.	.	.	.	.	.	.	IncFIB(Mar)/100/99.77/439	.	.	.	.
OW849395.1	-6.68089	44.4561	1	2	n/a	307	.	.	.	.	.	.	.	.	.	.	.	.	.	.	.	.	.	.	.	.	.	.	.	.	.	.	.	.	.	.	.	.	.	.	.	.	.	.	IncFIB(Mar)/100/99.77/439	.	.	.	.
OW849341.1	-6.61833	43.4642	1	2	n/a	147	.	.	.	.	.	.	.	.	.	.	.	.	.	.	.	.	.	.	.	.	.	.	.	.	.	.	.	.	.	.	.	.	.	.	.	.	.	.	IncFIB(K)/100/91.07/560	IncFIB(Mar)/100/99.77/439	.	.	.
OW849335.1	-6.65147	44.4444	1	2	n/a	307	.	.	.	.	.	.	.	.	.	.	.	.	.	.	.	.	.	.	.	.	.	.	.	.	.	.	.	.	.	.	.	.	.	.	.	.	.	.	IncFIB(Mar)/100/99.77/439	.	.	.	.
OW849317.1	-6.61846	43.464	1	2	n/a	147	.	.	.	.	.	.	.	.	.	.	.	.	.	.	.	.	.	.	.	.	.	.	.	.	.	.	.	.	.	.	.	.	.	.	.	.	.	.	IncFIB(K)/100/91.07/560	IncFIB(Mar)/100/99.77/439	.	.	.
OW849221.1	-6.67996	44.4613	1	2	n/a	307	.	.	.	.	.	.	.	.	.	.	.	.	.	.	.	.	.	.	.	.	.	.	.	.	.	.	.	.	.	.	.	.	.	.	.	.	.	.	IncFIB(Mar)/100/99.77/439	.	.	.	.
OW849184.1	-6.67967	44.4613	1	2	n/a	307	.	.	.	.	.	.	.	.	.	.	.	.	.	.	.	.	.	.	.	.	.	.	.	.	.	.	.	.	.	.	.	.	.	.	.	.	.	.	IncFIB(Mar)/100/99.77/439	.	.	.	.
OW849012.1	-7.08305	44.0995	1	2	n/a	392	.	.	.	.	.	.	.	.	.	.	.	.	.	.	.	.	.	.	.	.	.	.	.	.	.	.	.	.	.	.	.	.	.	.	.	.	.	.	IncFIB(Mar)/100/99.77/439	.	.	.	.
OW848996.1	-6.47908	44.3318	1	2	n/a	1961	.	.	.	.	.	.	.	.	.	.	.	.	.	.	.	.	.	.	.	.	.	.	.	.	.	.	.	.	.	.	.	.	.	.	.	.	.	.	.	.	.	.	.
OW848965.1	-6.99859	44.1875	1	2	n/a	392	.	.	.	.	.	.	.	.	.	.	.	.	.	.	.	.	.	.	.	.	.	.	.	.	.	.	.	.	.	.	.	.	.	.	.	.	.	.	IncFIB(Mar)/100/99.77/439	.	.	.	.
OW848887.1	-6.98146	44.1926	1	2	n/a	392	.	.	.	.	.	.	.	.	.	.	.	.	.	.	.	.	.	.	.	.	.	.	.	.	.	.	.	.	.	.	.	.	.	.	.	.	.	.	IncFIB(Mar)/100/99.77/439	.	.	.	.
OW848880.1	-7.00598	44.189	1	2	n/a	392	.	.	.	.	.	.	.	.	.	.	.	.	.	.	.	.	.	.	.	.	.	.	.	.	.	.	.	.	.	.	.	.	.	.	.	.	.	.	IncFIB(Mar)/100/99.77/439	.	.	.	.
OW848874.1	-2.28592	45.7242	0.432822	2	n/a	11	.	.	.	.	.	.	.	.	.	.	.	.	.	.	.	.	.	.	.	.	.	.	.	.	.	.	.	.	.	.	.	.	.	.	.	.	.	.	IncFIB(Mar)/100/95.22/439	.	.	.	.
OW848805.1	-2.3012	45.7298	0.434469	2	n/a	11	.	.	.	.	.	.	.	.	.	.	.	.	.	.	.	.	.	.	.	.	.	.	.	.	.	.	.	.	.	.	.	.	.	.	.	.	.	.	IncFIB(Mar)/100/95.22/439	.	.	.	.
LR890737.1	-2.30744	45.7276	0.434871	2	n/a	5822	.	.	.	.	.	.	.	.	.	.	.	.	.	.	.	.	.	.	.	.	.	.	.	.	.	.	.	.	.	.	.	.	.	.	.	.	.	.	IncFIB(Mar)/100/95.44/439	.	.	.	.
LR890573.1	-2.25469	45.7242	1	2	n/a	323	.	.	.	.	.	.	.	.	.	.	.	.	.	.	.	.	.	.	.	.	.	.	.	.	.	.	.	.	.	.	.	.	.	.	.	.	.	.	IncFIB(Mar)/100/95.44/439	.	.	.	.
LR890543.1	-6.09349	43.7983	1	2	n/a	461	.	.	.	.	.	.	.	.	.	.	.	.	.	.	.	.	.	.	.	.	.	.	.	.	.	.	.	.	.	.	.	.	.	.	.	.	.	.	.	.	.	.	.
LR890458.1	-7.30542	43.0961	1	2	n/a	37	.	.	.	.	.	.	.	.	.	.	.	.	.	.	.	.	.	.	.	.	.	.	.	.	.	.	.	.	.	.	.	.	.	.	.	.	.	.	IncFIB(Mar)/100/99.77/439	.	.	.	.
LR890400.1	-2.30844	45.7346	0.435388	2	n/a	347	.	.	.	.	.	.	.	.	.	.	.	.	.	.	.	.	.	.	.	.	.	.	.	.	.	.	.	.	.	.	.	.	.	.	.	.	.	.	IncFIB(Mar)/100/95.44/439	.	.	.	.
LR890192.1	-2.30352	45.7324	0.434832	2	n/a	323	.	.	.	.	.	.	.	.	.	.	.	.	.	.	.	.	.	.	.	.	.	.	.	.	.	.	.	.	.	.	.	.	.	.	.	.	.	.	IncFIB(Mar)/100/95.44/439	.	.	.	.
LR134210.1	-9.71728	40.7053	0.37381	2	n/a	375	.	.	.	.	.	.	.	.	.	.	.	.	.	.	.	.	.	.	.	.	.	.	.	.	.	.	.	.	.	.	.	.	.	.	.	.	.	.	.	.	.	.	.
LN824134.1	-6.15945	45.6769	1	2	n/a	147	.	.	.	.	.	.	.	.	.	.	.	.	.	.	.	.	.	.	.	.	.	.	.	.	.	.	.	.	.	.	.	.	.	.	.	.	.	.	IncHI1B/100/99.82/570	IncFIB(Mar)/100/99.54/439	.	.	.
CP119184.1	-7.82769	49.4885	1	2	n/a	307	.	.	.	.	.	.	.	.	.	.	.	.	.	.	.	.	.	.	.	.	.	.	.	.	.	.	.	.	.	.	.	.	.	.	.	.	.	.	IncFIB(Mar)/100/99.32/439	IncHI1B/99.82/99.3/570	.	.	.
CP117482.1	-8.42688	47.2187	1	2	n/a	1309	.	.	.	.	.	.	.	.	.	.	.	.	.	.	.	.	.	.	.	.	.	.	.	.	.	.	.	.	.	.	.	.	.	.	.	.	.	.	IncFIB(Mar)/100/99.77/439	.	.	.	.
CP115708.1	-5.99831	49.0963	1	2	n/a	14	.	.	.	.	.	.	.	.	.	.	.	.	.	.	.	.	.	.	.	.	.	.	.	.	.	.	.	.	.	.	.	.	.	.	.	.	.	.	IncHI1B/100/100/570	IncFIB(Mar)/100/99.54/439	.	.	.
CP113221.1	-7.36561	47.8844	1	2	n/a	656	.	.	.	.	.	.	.	.	.	.	.	.	.	.	.	.	.	.	.	.	.	.	.	.	.	.	.	.	.	.	.	.	.	.	.	.	.	.	IncFIB(Mar)/100/99.32/439	IncHI1B/100/100/570	.	.	.
CP113217.1	-7.02841	47.2813	1	2	n/a	37	.	.	.	.	.	.	.	.	.	.	.	.	.	.	.	.	.	.	.	.	.	.	.	.	.	.	.	.	.	.	.	.	.	.	.	.	.	.	IncFIB(Mar)/100/99.32/439	.	.	.	.
CP113212.1	-7.55703	47.6952	1	2	n/a	656	.	.	.	.	.	.	.	.	.	.	.	.	.	.	.	.	.	.	.	.	.	.	.	.	.	.	.	.	.	.	.	.	.	.	.	.	.	.	IncFIB(Mar)/100/99.32/439	IncHI1B/100/100/570	.	.	.
CP113203.1	-7.3639	47.8736	1	2	n/a	656	.	.	.	.	.	.	.	.	.	.	.	.	.	.	.	.	.	.	.	.	.	.	.	.	.	.	.	.	.	.	.	.	.	.	.	.	.	.	IncHI1B/100/100/570	IncFIB(Mar)/100/99.32/439	.	.	.
CP113200.1	-7.35973	47.8967	1	2	n/a	656	.	.	.	.	.	.	.	.	.	.	.	.	.	.	.	.	.	.	.	.	.	.	.	.	.	.	.	.	.	.	.	.	.	.	.	.	.	.	Col440I/100/93.86/114	IncHI1B/100/100/570	IncFIB(Mar)/100/99.32/439	.	.
CP113193.1	-7.48558	48.5998	1	2	n/a	789	.	.	.	.	.	.	.	.	.	.	.	.	.	.	.	.	.	.	.	.	.	.	.	.	.	.	.	.	.	.	.	.	.	.	.	.	.	.	IncHI1B/100/100/570	IncX1/100/98.4/374	IncFIB(Mar)/100/99.32/439	IncR/100/100/251	.
CP113186.1	-7.26779	48.1138	1	2	n/a	15	.	.	.	.	.	.	.	.	.	.	.	.	.	.	.	.	.	.	.	.	.	.	.	.	.	.	.	.	.	.	.	.	.	.	.	.	.	.	IncHI1B/100/100/570	IncFIB(Mar)/100/99.32/439	.	.	.
CP113179.1	-7.03142	48.2555	1	2	n/a	15	.	.	.	.	.	.	.	.	.	.	.	.	.	.	.	.	.	.	.	.	.	.	.	.	.	.	.	.	.	.	.	.	.	.	.	.	.	.	IncHI1B/100/100/570	IncFIB(Mar)/100/99.32/439	.	.	.
CP113169.1	-7.33584	48.0421	1	2	n/a	273	.	.	.	.	.	.	.	.	.	.	.	.	.	.	.	.	.	.	.	.	.	.	.	.	.	.	.	.	.	.	.	.	.	.	.	.	.	.	IncHI1B/100/100/570	IncFIB(Mar)/100/99.32/439	.	.	.
CP110662.1	-6.18474	45.2318	1	2	n/a	20	.	.	.	.	.	.	.	.	.	.	.	.	.	.	.	.	.	.	.	.	.	.	.	.	.	.	.	.	.	.	.	.	.	.	.	.	.	.	IncFIB(Mar)/100/99.54/439	.	.	.	.
CP110524.1	-8.98273	43.0757	0.714711	2	n/a	-	.	.	.	.	.	.	.	.	.	.	.	.	.	.	.	.	.	.	.	.	.	.	.	.	.	.	.	.	.	.	.	.	.	.	.	.	.	.	IncFIB(Mar)/100/100/439	IncHI1B/100/99.47/570	.	.	.
CP110515.1	-8.98492	43.0746	0.714704	2	n/a	-	.	.	.	.	.	.	.	.	.	.	.	.	.	.	.	.	.	.	.	.	.	.	.	.	.	.	.	.	.	.	.	.	.	.	.	.	.	.	IncFIB(Mar)/100/100/439	IncHI1B/100/99.47/570	.	.	.
CP103504.1	-5.32947	49.392	1	2	n/a	14	.	.	.	.	.	.	.	.	.	.	.	NDM-like	.	.	.	.	.	.	.	.	.	.	.	.	.	.	blaNDM-1	.	.	.	.	.	.	.	.	.	.	.	IncHI1B/68.07/100/570	.	.	.	.
CP102884.1	-4.78999	48.4112	1	2	n/a	37	.	.	.	.	.	.	.	.	.	.	.	.	.	.	.	.	.	.	.	.	.	.	.	.	.	.	.	.	.	.	.	.	.	.	.	.	.	.	IncHI1B/100/100/570	IncFIB(Mar)/100/99.54/439	.	.	.
CP102878.1	-4.79328	48.4416	1	2	n/a	37	.	.	.	.	.	.	.	.	.	.	.	.	.	.	.	.	.	.	.	.	.	.	.	.	.	.	.	.	.	.	.	.	.	.	.	.	.	.	IncHI1B/100/100/570	IncFIB(Mar)/100/99.54/439	.	.	.
CP102078.1	-7.45943	47.9644	1	2	n/a	273	.	.	.	.	.	CTX-M-1-like	.	.	.	.	.	.	.	.	.	.	.	.	.	.	.	.	.	.	.	.	.	.	.	.	.	.	.	.	.	.	.	.	IncHI1B/100/100/570	IncR/100/100/251	IncFIB(Mar)/100/99.32/439	.	.
CP100521.1	-9.80207	47.7538	1	2	n/a	427	.	.	.	.	.	.	.	.	.	.	.	.	.	.	.	.	.	.	.	.	.	.	.	.	.	.	.	.	.	.	.	.	.	.	.	.	.	.	IncHI1B/100/99.47/570	IncFIB(Mar)/100/99.32/439	.	.	.
CP100479.1	-9.80062	47.75	1	2	n/a	427	.	.	.	.	.	.	.	.	.	.	.	.	.	.	.	.	.	.	.	.	.	.	.	.	.	.	.	.	.	.	.	.	.	.	.	.	.	.	IncHI1B/100/99.47/570	IncFIB(Mar)/100/99.32/439	.	.	.
CP098170.1	-6.31267	47.6119	1	2	n/a	392	.	.	.	.	.	.	.	.	.	.	.	.	.	.	.	.	.	.	.	.	.	.	.	.	.	.	.	.	.	.	.	.	.	.	.	.	.	.	IncHI1B/100/100/570	IncFIB(Mar)/100/100/439	.	.	.
CP098156.1	-6.17952	47.7368	1	2	n/a	950	.	.	.	.	.	.	.	.	.	CTX-M-9-like	.	.	.	.	.	.	.	.	.	.	.	.	.	.	.	.	.	.	.	.	.	.	.	.	.	.	.	.	IncFIB(Mar)/100/100/439	IncHI1B/100/100/570	.	.	.
CP098147.1	-6.17917	47.7385	1	2	n/a	307	.	.	.	.	.	.	.	.	.	CTX-M-9-like	.	.	.	.	.	.	.	.	.	.	.	.	.	.	.	.	.	.	.	.	.	.	.	.	.	.	.	.	IncFIB(Mar)/100/100/439	IncHI1B/100/100/570	.	.	.
CP098140.1	-6.50774	48.216	1	2	n/a	392	.	.	.	.	.	.	.	.	.	.	.	.	.	.	.	.	.	.	.	.	.	.	.	.	.	.	.	.	.	.	.	.	.	.	.	.	.	.	IncHI1B/100/100/570	IncQ1/66.46/100/796	IncFIB(Mar)/100/99.32/439	.	.
CP098135.1	-6.55466	48.2626	1	2	n/a	392	.	.	.	.	.	.	.	.	.	.	.	.	.	.	.	.	.	.	.	.	.	.	.	.	.	.	.	.	.	.	.	.	.	.	.	.	.	.	IncHI1B/100/100/570	IncQ1/66.46/100/796	IncFIB(Mar)/100/99.32/439	.	.
CP098133.1	-6.52729	48.2946	1	2	n/a	392	.	.	.	.	.	.	.	.	.	.	.	.	.	.	.	.	.	.	.	.	.	.	.	.	.	.	.	.	.	.	.	.	.	.	.	.	.	.	IncHI1B/100/100/570	IncQ1/66.46/100/796	IncFIB(Mar)/100/99.32/439	.	.
CP098127.1	-6.55457	48.2626	1	2	n/a	392	.	.	.	.	.	.	.	.	.	.	.	.	.	.	.	.	.	.	.	.	.	.	.	.	.	.	.	.	.	.	.	.	.	.	.	.	.	.	IncQ1/66.46/100/796	IncFIB(Mar)/100/99.32/439	IncHI1B/100/100/570	.	.
CP097678.1	-7.12486	46.8405	1	2	n/a	11	.	.	.	.	.	.	.	.	.	.	.	.	.	.	.	.	.	.	.	.	.	.	.	.	.	.	.	.	.	.	.	.	.	.	.	.	.	.	IncHI1B/100/100/570	IncFIB(Mar)/100/100/439	.	.	.
CP097396.1	-5.80132	49.1369	1	2	n/a	147	.	.	.	.	.	.	.	.	.	.	.	NDM-like	.	.	.	.	.	SHV-like	.	.	.	.	.	.	.	.	blaNDM-1	.	.	.	.	.	.	.	.	.	blaSHV-11	.	IncFIB(Mar)/100/99.54/439	IncHI1B/100/100/570	.	.	.
CP097238.1	-5.8533	49.3392	1	2	n/a	14	.	.	.	.	.	.	.	.	.	.	.	NDM-like	.	OXA-1-like	.	.	.	.	.	.	.	.	.	.	.	.	blaNDM-1	blaOXA-1	.	.	.	.	.	.	.	.	.	.	IncHI1B/100/100/570	IncFIB(Mar)/100/99.54/439	.	.	.
CP097233.1	-5.85361	49.3377	1	2	n/a	14	.	.	.	.	.	.	.	.	.	.	.	NDM-like	.	OXA-1-like	.	.	.	.	.	.	.	.	.	.	.	.	blaNDM-1	blaOXA-1	.	.	.	.	.	.	.	.	.	.	IncHI1B/100/100/570	IncFIB(Mar)/100/99.54/439	.	.	.
CP097229.1	-4.73394	50.6007	1	2	n/a	14	.	.	.	.	.	.	.	.	.	.	.	NDM-like	.	OXA-1-like	.	.	.	.	.	.	.	.	.	.	.	.	blaNDM-1	blaOXA-1	.	.	.	.	.	.	.	.	.	.	IncHI1B/100/100/570	IncFIB(Mar)/100/99.54/439	IncFIB(K)/100/100/560	.	.
CP097224.1	-5.06101	49.2605	1	2	n/a	14	.	.	.	.	.	.	.	.	.	.	.	NDM-like	.	.	.	.	.	.	.	.	.	.	.	.	.	.	blaNDM-1	.	.	.	.	.	.	.	.	.	.	.	IncHI1B/100/100/570	IncFIB(Mar)/100/99.54/439	.	.	.
CP097191.1	-7.34592	47.8835	1	2	n/a	656	.	.	.	.	.	.	.	.	.	.	.	.	.	.	.	.	.	.	.	.	.	.	.	.	.	.	.	.	.	.	.	.	.	.	.	.	.	.	IncHI1B/100/100/570	IncFIB(Mar)/100/99.32/439	.	.	.
CP092902.1	-5.66143	48.0285	1	2	n/a	1	.	.	.	.	.	.	.	.	.	CTX-M-9-like	.	.	.	OXA-1-like	.	.	.	.	.	blaCTX-M-14	.	.	.	.	.	.	.	blaOXA-1	.	.	.	.	.	.	.	.	.	.	IncHI1B/100/100/570	IncFIB(Mar)/100/100/439	.	.	.
CP092401.1	-9.71041	47.1379	1	2	n/a	111	.	.	.	.	.	.	.	.	.	.	.	.	.	.	.	.	.	.	.	.	.	.	.	.	.	.	.	.	.	.	.	.	.	.	.	.	.	.	IncHI1B/100/99.47/570	IncFIB(Mar)/100/100/439	.	.	.
CP092398.1	-10.2846	44.937	0.788523	2	n/a	-	.	.	.	.	.	.	.	.	.	.	.	.	.	.	.	.	.	.	.	.	.	.	.	.	.	.	.	.	.	.	.	.	.	.	.	.	.	.	IncFIB(Mar)/100/99.32/439	.	.	.	.
CP091602.1	-5.82044	49.5501	1	2	n/a	14	.	.	.	.	.	CTX-M-1-like	.	.	.	.	.	NDM-like	.	OXA-1-like	.	.	.	.	blaCTX-M-15	.	.	.	.	.	.	.	blaNDM-1	blaOXA-1	.	.	.	.	.	.	.	.	.	.	IncHI1B/100/100/570	IncFIB(Mar)/100/99.54/439	.	.	.
CP091588.1	-10.0329	47.9898	1	2	n/a	147	.	.	.	.	.	.	.	.	.	.	.	.	.	.	.	.	.	.	.	.	.	.	.	.	.	.	.	.	.	.	.	.	.	.	.	.	.	.	IncHI1B/100/99.47/570	IncFIB(Mar)/100/99.54/439	.	.	.
CP091583.1	-7.51054	46.7928	1	2	n/a	11	.	.	.	.	.	.	.	CTX-M-2-like	.	.	.	.	.	.	.	.	.	.	.	.	.	.	.	.	.	.	.	.	.	.	.	.	.	.	.	.	.	.	IncFIB(Mar)/100/99.77/439	IncHI1B/100/99.82/570	.	.	.
CP090932.1	-4.82321	47.3718	1	2	n/a	340	.	.	.	.	.	.	.	.	.	.	.	.	.	.	.	.	OXA-9-like	.	.	.	.	.	.	.	.	.	.	.	.	.	.	blaOXA-9	.	.	.	.	.	.	IncHI1B/100/99.82/570	.	.	.	.
CP089960.1	-7.12663	45.5557	1	2	n/a	4845	.	.	.	.	.	.	.	.	.	.	.	.	.	.	.	.	.	.	.	.	.	.	.	.	.	.	.	.	.	.	.	.	.	.	.	.	.	.	IncHI1B/100/99.3/570	IncFIB(Mar)/100/99.32/439	.	.	.
CP089883.1	-6.81587	45.2193	1	2	n/a	37	.	.	.	.	.	.	.	.	.	.	.	.	.	.	.	.	.	.	.	.	.	.	.	.	.	.	.	.	.	.	.	.	.	.	.	.	.	.	IncFIB(Mar)/100/100/439	.	.	.	.
CP089428.1	-4.85535	47.367	0.868299	2	n/a	340	.	.	.	.	.	.	.	.	.	.	.	.	.	.	.	.	OXA-9-like	.	.	.	.	.	.	.	.	.	.	.	.	.	.	blaOXA-9	.	.	.	.	.	.	IncHI1B/100/99.82/570	.	.	.	.
CP089098.1	-5.6393	48.1288	1	2	n/a	5605	.	.	.	.	.	.	.	.	.	.	.	.	.	.	.	.	.	.	.	.	.	.	.	.	.	.	.	.	.	.	.	.	.	.	.	.	.	.	IncFIB(Mar)/100/100/439	IncHI1B/100/99.47/570	.	.	.
CP088121.1	-7.22243	48.0484	1	2	n/a	11	.	.	.	.	.	.	.	.	.	.	.	.	.	.	.	.	.	.	.	.	.	.	.	.	.	.	.	.	.	.	.	.	.	.	.	.	.	.	IncHI1B/100/100/570	IncFIB(Mar)/100/99.32/439	.	.	.
CP087670.1	-7.21531	47.9495	1	2	n/a	37	.	.	.	.	.	.	.	.	.	.	.	.	.	.	.	.	.	.	.	.	.	.	.	.	.	.	.	.	.	.	.	.	.	.	.	.	.	.	IncHI1B/100/100/570	IncFIB(Mar)/100/99.32/439	.	.	.
CP083071.1	-8.82792	47.3501	1	2	n/a	392	.	.	.	.	.	.	.	.	.	.	.	.	.	.	.	.	.	.	.	.	.	.	.	.	.	.	.	.	.	.	.	.	.	.	.	.	.	.	IncHI1B/100/99.47/570	IncFIB(Mar)/100/99.54/439	.	.	.
CP083048.1	-5.93392	49.1158	1	2	n/a	14	.	.	.	.	.	.	.	.	.	.	.	.	.	.	.	.	.	.	.	.	.	.	.	.	.	.	.	.	.	.	.	.	.	.	.	.	.	.	IncHI1B/100/100/570	IncFIB(Mar)/100/99.54/439	.	.	.
CP083044.1	-5.96403	49.1074	1	2	n/a	14	.	.	.	.	.	.	.	.	.	.	.	.	.	.	.	.	.	.	.	.	.	.	.	.	.	.	.	.	.	.	.	.	.	.	.	.	.	.	IncHI1B/100/100/570	IncFIB(Mar)/100/99.54/439	.	.	.
CP082986.1	-9.74284	49.1744	0.956075	2	n/a	152	.	.	.	.	.	CTX-M-1-like	.	.	.	.	.	NDM-like	.	OXA-1-like	.	.	.	.	blaCTX-M-15	.	.	.	.	.	.	.	blaNDM-1	blaOXA-1	.	.	.	.	.	.	.	.	.	.	IncFIB(Mar)/100/99.54/439	IncHI1B/100/99.47/570	.	.	.
CP082976.1	-9.74266	49.1713	0.957562	2	n/a	152	.	.	.	.	.	CTX-M-1-like	.	.	.	.	.	NDM-like	.	OXA-1-like	.	.	.	.	blaCTX-M-15	.	.	.	.	.	.	.	blaNDM-1	blaOXA-1	.	.	.	.	.	.	.	.	.	.	IncFIB(Mar)/100/99.54/439	IncHI1B/100/99.47/570	.	.	.
CP082938.1	-5.46946	44.3342	1	2	n/a	48	.	.	.	.	.	.	.	.	.	.	.	.	.	.	.	.	.	.	.	.	.	.	.	.	.	.	.	.	.	.	.	.	.	.	.	.	.	.	IncFIB(Mar)/100/95.22/439	.	.	.	.
CP080352.1	-6.1839	47.7031	1	2	n/a	656	.	.	.	.	.	.	.	.	.	.	.	.	.	.	.	.	.	.	.	.	.	.	.	.	.	.	.	.	.	.	.	.	.	.	.	.	.	.	IncFIB(Mar)/100/100/439	IncHI1B/100/100/570	.	.	.
CP079784.1	-7.1014	48.1863	1	2	n/a	1326	.	.	.	.	.	.	.	.	.	.	.	.	.	.	.	.	.	.	.	.	.	.	.	.	.	.	.	.	.	.	.	.	.	.	.	.	.	.	IncHI1B/100/100/570	IncFIB(Mar)/100/100/439	.	.	.
CP079669.1	-5.83246	49.63	1	2	n/a	14	.	.	.	.	.	CTX-M-1-like	.	.	.	.	.	.	.	OXA-1-like	.	.	.	.	blaCTX-M-15	.	.	.	.	.	.	.	.	blaOXA-1	.	.	.	.	.	.	.	.	.	.	IncFIB(Mar)/100/99.54/439	IncHI1B/100/100/570	.	.	.
CP079156.1	-5.86641	49.5574	1	2	n/a	14	.	.	.	.	.	CTX-M-1-like	.	.	.	.	.	.	.	OXA-1-like	.	.	.	.	blaCTX-M-15	.	.	.	.	.	.	.	.	blaOXA-1	.	.	.	.	.	.	.	.	.	.	IncFIB(Mar)/100/99.54/439	IncHI1B/100/100/570	.	.	.
CP079151.1	-5.83247	49.63	1	2	n/a	14	.	.	.	.	.	CTX-M-1-like	.	.	.	.	.	.	.	OXA-1-like	.	.	.	.	blaCTX-M-15	.	.	.	.	.	.	.	.	blaOXA-1	.	.	.	.	.	.	.	.	.	.	IncFIB(Mar)/100/99.54/439	IncHI1B/100/100/570	.	.	.
CP079146.1	-5.83246	49.63	1	2	n/a	14	.	.	.	.	.	CTX-M-1-like	.	.	.	.	.	.	.	OXA-1-like	.	.	.	.	blaCTX-M-15	.	.	.	.	.	.	.	.	blaOXA-1	.	.	.	.	.	.	.	.	.	.	IncFIB(Mar)/100/99.54/439	IncHI1B/100/100/570	.	.	.
CP079139.1	-5.86674	49.5574	1	2	n/a	14	.	.	.	.	.	CTX-M-1-like	.	.	.	.	.	.	.	OXA-1-like	.	.	.	.	blaCTX-M-15	.	.	.	.	.	.	.	.	blaOXA-1	.	.	.	.	.	.	.	.	.	.	IncFIB(Mar)/100/99.54/439	IncHI1B/100/100/570	.	.	.
CP078034.1	-5.63981	49.6705	1	2	n/a	14	.	.	.	.	.	CTX-M-1-like	.	.	.	.	.	NDM-like	.	OXA-1-like	.	.	OXA-9-like	.	blaCTX-M-15	.	.	.	.	.	.	.	blaNDM-1	blaOXA-1	.	.	.	blaOXA-9	.	.	.	.	.	.	IncFIB(Mar)/100/99.54/439	IncHI1B/100/100/570	IncR/100/100/251	.	.
CP075559.1	-7.52347	47.7378	1	2	n/a	967	.	.	.	.	.	.	.	.	.	.	.	.	.	.	.	.	.	.	.	.	.	.	.	.	.	.	.	.	.	.	.	.	.	.	.	.	.	.	IncHI1B/100/100/570	IncFIB(Mar)/100/99.32/439	.	.	.
CP075551.1	-7.41507	47.7021	1	2	n/a	896	.	.	.	.	.	.	.	.	.	.	.	.	.	.	.	.	.	.	.	.	.	.	.	.	.	.	.	.	.	.	.	.	.	.	.	.	.	.	IncFIB(Mar)/100/99.32/439	IncHI1B/100/100/570	.	.	.
CP075455.1	-7.41997	47.6986	1	2	n/a	896	.	.	.	.	.	.	.	.	.	.	.	.	.	.	.	.	.	.	.	.	.	.	.	.	.	.	.	.	.	.	.	.	.	.	.	.	.	.	IncHI1B/100/100/570	IncFIB(Mar)/100/99.32/439	.	.	.
CP075257.1	-7.36342	47.8772	1	2	n/a	147	.	.	.	.	.	.	.	.	.	.	.	.	.	.	.	.	.	.	.	.	.	.	.	.	.	.	.	.	.	.	.	.	.	.	.	.	.	.	IncHI1B/100/100/570	IncFIB(Mar)/100/99.32/439	.	.	.
CP072906.1	-8.66712	49.1836	1	2	n/a	147	.	.	.	.	.	.	.	.	.	.	.	NDM-like	.	OXA-1-like	.	.	.	.	.	.	.	.	.	.	.	.	blaNDM-1	blaOXA-1	.	.	.	.	.	.	.	.	.	.	IncFIB(Mar)/100/99.77/439	IncHI1B/100/99.47/570	.	.	.
CP071820.1	-8.60232	48.4437	1	2	n/a	17	.	.	.	.	.	.	.	.	CTX-M-8-like	.	.	.	.	.	.	.	.	.	.	.	.	.	.	.	.	.	.	.	.	.	.	.	.	.	.	.	.	.	IncN/100/100/514	IncHI1B/100/99.47/570	IncFIB(Mar)/100/99.54/439	.	.
CP071280.1	-5.8729	49.1545	1	2	n/a	14	.	.	.	.	.	.	.	.	.	.	.	NDM-like	.	.	.	.	.	.	.	.	.	.	.	.	.	.	blaNDM-1	.	.	.	.	.	.	.	.	.	.	.	IncFIB(Mar)/100/99.54/439	IncHI1B/100/100/570	.	.	.
CP069904.1	-5.52922	44.4411	1	2	n/a	3145	.	.	.	.	.	.	.	.	.	.	.	.	.	.	.	.	.	.	.	.	.	.	.	.	.	.	.	.	.	.	.	.	.	.	.	.	.	.	.	.	.	.	.
CP067962.1	-10.2867	47.5624	1	2	n/a	307	.	.	.	.	.	.	.	.	.	.	.	.	.	.	.	.	.	.	.	.	.	.	.	.	.	.	.	.	.	.	.	.	.	.	.	.	.	.	IncHI1B/100/99.47/570	IncFIB(Mar)/100/99.54/439	.	.	.
CP067932.1	-5.38435	46.2942	0.910384	2	n/a	244	.	.	.	.	.	.	.	.	.	.	.	.	.	.	.	.	.	.	.	.	.	.	.	.	.	.	.	.	.	.	.	.	.	.	.	.	.	.	IncHI1B/68.07/100/570	.	.	.	.
CP067878.1	-8.38789	47.512	1	2	n/a	307	.	.	.	.	.	.	.	.	.	.	.	.	.	.	.	.	.	.	.	.	.	.	.	.	.	.	.	.	.	.	.	.	.	.	.	.	.	.	IncHI1B/100/100/570	IncFIB(Mar)/100/99.32/439	.	.	.
CP067699.1	-5.44117	46.2982	0.912109	2	n/a	258	.	.	.	.	.	.	.	.	.	.	.	.	.	.	.	.	.	.	.	.	.	.	.	.	.	.	.	.	.	.	.	.	.	.	.	.	.	.	IncHI1B/100/99.82/570	.	.	.	.
CP067531.1	-9.61958	45.318	0.932668	2	n/a	17	.	.	.	.	.	.	.	.	.	.	.	.	.	.	.	.	.	.	.	.	.	.	.	.	.	.	.	.	.	.	.	.	.	.	.	.	.	.	IncFIB(Mar)/100/99.77/439	IncHI1B/100/99.47/570	.	.	.
CP067474.1	-10.3305	47.6124	1	2	n/a	307	.	.	.	.	.	.	.	.	.	.	.	.	.	.	.	.	.	.	.	.	.	.	.	.	.	.	.	.	.	.	.	.	.	.	.	.	.	.	IncHI1B/100/99.47/570	IncFIB(Mar)/100/99.54/439	.	.	.
CP067450.1	-10.3305	47.6127	1	2	n/a	307	.	.	.	.	.	.	.	.	.	.	.	.	.	.	.	.	.	.	.	.	.	.	.	.	.	.	.	.	.	.	.	.	.	.	.	.	.	.	IncHI1B/100/99.47/570	IncFIB(Mar)/100/99.54/439	.	.	.
CP065953.1	-8.48422	49.8358	0.866976	2	n/a	11	.	.	.	.	.	.	.	.	.	.	.	.	.	.	.	.	.	.	.	.	.	.	.	.	.	.	.	.	.	.	.	.	.	.	.	.	.	.	IncN/100/100/514	IncHI1B/100/99.47/570	IncFIB(Mar)/100/100/439	.	.
CP065174.1	-2.29873	45.7262	0.434035	2	n/a	323	.	.	.	.	.	.	.	.	.	.	.	.	.	.	.	.	.	.	.	.	.	.	.	.	.	.	.	.	.	.	.	.	.	.	.	.	.	.	IncFIB(Mar)/100/95.44/439	.	.	.	.
CP064821.1	-8.99747	47.4615	1	2	n/a	-	.	.	.	.	.	.	.	.	.	.	.	.	.	.	.	.	.	.	.	.	.	.	.	.	.	.	.	.	.	.	.	.	.	.	.	.	.	.	IncFIB(Mar)/98.63/98.18/439	IncHI1B/99.3/98.77/570	.	.	.
CP059469.1	-5.86939	49.5579	1	2	n/a	14	.	.	.	.	.	CTX-M-1-like	.	.	.	.	.	.	.	OXA-1-like	.	.	.	.	blaCTX-M-15	.	.	.	.	.	.	.	.	blaOXA-1	.	.	.	.	.	.	.	.	.	.	IncFIB(Mar)/100/99.54/439	IncHI1B/100/100/570	.	.	.
CP059311.1	-6.18423	49.0823	1	2	n/a	147	.	.	.	.	.	CTX-M-1-like	.	.	.	.	.	NDM-like	.	OXA-1-like	.	.	.	.	blaCTX-M-15	.	.	.	.	.	.	.	blaNDM-1	blaOXA-1	.	.	.	.	.	.	.	.	.	.	IncHI1B/100/100/570	IncFIB(Mar)/100/100/439	.	.	.
CP058870.1	-6.37585	47.7518	1	2	n/a	1	.	.	.	.	.	.	.	.	.	.	.	.	.	.	.	.	.	.	.	.	.	.	.	.	.	.	.	.	.	.	.	.	.	.	.	.	.	.	IncHI1B/100/100/570	IncFIB(Mar)/100/100/439	.	.	.
CP058867.1	-10.912	46.909	1	2	n/a	15	.	.	.	.	.	.	.	.	.	.	.	.	.	.	.	.	.	.	.	.	.	.	.	.	.	.	.	.	.	.	.	.	.	.	.	.	.	.	IncFIB(Mar)/100/99.54/439	.	.	.	.
CP057460.1	-10.3601	45.0855	0.850585	2	n/a	45	.	.	.	.	.	.	.	.	.	.	.	.	.	.	.	.	.	.	.	.	.	.	.	.	.	.	.	.	.	.	.	.	.	.	.	.	.	.	.	.	.	.	.
CP057314.1	-9.98371	47.9584	1	2	n/a	966	.	.	.	.	.	.	.	.	.	.	.	.	.	.	.	.	.	.	.	.	.	.	.	.	.	.	.	.	.	.	.	.	.	.	.	.	.	.	IncHI1B/100/99.47/570	IncFIB(Mar)/100/99.54/439	.	.	.
CP057067.1	-10.014	47.7267	1	2	n/a	161	.	.	.	.	.	.	.	.	.	.	.	.	.	.	.	.	.	.	.	.	.	.	.	.	.	.	.	.	.	.	.	.	.	.	.	.	.	.	IncHI1B/100/100/570	IncFIB(Mar)/100/99.54/439	.	.	.
CP056276.1	-8.15714	46.5543	1	2	n/a	17	.	.	.	.	.	.	.	.	.	.	.	.	.	.	.	.	.	.	.	.	.	.	.	.	.	.	.	.	.	.	.	.	.	.	.	.	.	.	IncFIB(Mar)/100/99.77/439	.	.	.	.
CP055107.1	-8.70755	46.2282	1	2	n/a	661	.	.	.	.	.	.	.	.	.	.	.	.	.	.	.	.	.	.	.	.	.	.	.	.	.	.	.	.	.	.	.	.	.	.	.	.	.	.	IncFIB(Mar)/100/100/439	.	.	.	.
CP055058.1	-7.93641	47.5122	1	2	n/a	2601	.	.	.	.	.	.	.	.	.	.	.	.	.	.	.	.	.	.	.	.	.	.	.	.	.	.	.	.	.	.	.	.	.	.	.	.	.	.	IncHI1B/100/100/570	IncFIB(Mar)/100/99.32/439	.	.	.
CP054968.1	-6.80475	47.0189	1	2	n/a	1922	.	.	.	.	.	.	.	.	.	.	.	.	.	.	.	.	.	.	.	.	.	.	.	.	.	.	.	.	.	.	.	.	.	.	.	.	.	.	IncFIB(Mar)/100/99.32/439	.	.	.	.
CP052558.1	-8.42587	45.2985	1	2	n/a	307	.	.	.	.	.	.	.	.	.	.	.	.	.	OXA-1-like	.	.	.	.	.	.	.	.	.	.	.	.	.	.	.	.	.	.	.	.	.	.	.	.	IncFIB(Mar)/100/99.09/439	.	.	.	.
CP052539.1	-8.05939	47.0848	1	2	n/a	11	.	.	.	.	.	.	.	.	.	.	.	.	.	.	.	.	.	.	.	.	.	.	.	.	.	.	.	.	.	.	.	.	.	.	.	.	.	.	IncHI1B/100/99.65/570	IncFIB(Mar)/100/100/439	.	.	.
CP052488.1	-8.40479	45.2993	1	2	n/a	307	.	.	.	.	.	.	.	.	.	.	.	.	.	OXA-1-like	.	.	.	.	.	.	.	.	.	.	.	.	.	.	.	.	.	.	.	.	.	.	.	.	IncFIB(Mar)/100/99.09/439	.	.	.	.
CP052400.1	-5.75739	47.643	1	2	n/a	11	.	.	.	.	.	.	.	.	.	CTX-M-9-like	.	.	.	OXA-1-like	.	.	.	.	.	.	.	.	.	.	.	.	.	blaOXA-1	.	.	.	.	.	.	.	.	.	.	IncHI1B/100/99.3/570	IncFIB(Mar)/100/100/439	.	.	.
CP052327.1	-10.3668	48.8526	0.897566	2	n/a	307	.	.	.	.	.	.	.	.	.	.	.	.	.	.	.	.	.	.	.	.	.	.	.	.	.	.	.	.	.	.	.	.	.	.	.	.	.	.	IncHI1B/100/99.47/570	IncFIB(Mar)/100/99.54/439	.	.	.
CP052325.1	-8.01504	47.5504	1	2	n/a	370	.	.	.	.	.	.	.	.	.	CTX-M-9-like	.	.	.	.	.	.	.	.	.	blaCTX-M-14	.	.	.	.	.	.	.	.	.	.	.	.	.	.	.	.	.	.	IncHI1B/100/100/570	IncFIB(Mar)/100/99.32/439	.	.	.
CP052310.1	-8.41805	45.32	1	2	n/a	15	.	.	.	.	.	.	.	.	.	.	.	.	.	OXA-1-like	.	.	.	.	.	.	.	.	.	.	.	.	.	.	.	.	.	.	.	.	.	.	.	.	IncFIB(Mar)/100/99.09/439	.	.	.	.
CP052269.1	-8.42646	45.3068	1	2	n/a	307	.	.	.	.	.	.	.	.	.	.	.	.	.	OXA-1-like	.	.	.	.	.	.	.	.	.	.	.	.	.	.	.	.	.	.	.	.	.	.	.	.	IncFIB(Mar)/100/99.09/439	.	.	.	.
CP052242.1	-8.41407	45.3245	1	2	n/a	307	.	.	.	.	.	.	.	.	.	.	.	.	.	OXA-1-like	.	.	.	.	.	.	.	.	.	.	.	.	.	.	.	.	.	.	.	.	.	.	.	.	IncFIB(Mar)/100/99.09/439	.	.	.	.
CP052240.1	-10.3308	48.9225	0.866976	2	n/a	307	.	.	.	.	.	.	.	.	.	.	.	.	.	OXA-1-like	.	.	.	.	.	.	.	.	.	.	.	.	.	.	.	.	.	.	.	.	.	.	.	.	IncHI1B/100/99.47/570	IncFIB(Mar)/100/99.54/439	.	.	.
CP052233.1	-8.52134	45.0862	0.984499	2	n/a	48	.	.	.	.	.	.	.	.	.	.	.	.	.	OXA-1-like	.	.	.	.	.	.	.	.	.	.	.	.	.	.	.	.	.	.	.	.	.	.	.	.	IncFIB(Mar)/100/99.09/439	.	.	.	.
CP052208.1	-8.42174	45.3057	1	2	n/a	307	.	.	.	.	.	.	.	.	.	.	.	.	.	OXA-1-like	.	.	.	.	.	.	.	.	.	.	.	.	.	.	.	.	.	.	.	.	.	.	.	.	IncFIB(Mar)/100/99.09/439	.	.	.	.
CP044386.1	-8.47996	49.8639	0.860128	2	n/a	-	.	.	.	.	.	.	.	.	.	.	.	.	.	.	.	.	.	.	.	.	.	.	.	.	.	.	.	.	.	.	.	.	.	.	.	.	.	.	IncN/100/100/514	IncFIB(Mar)/100/100/439	IncHI1B/100/99.12/570	.	.
CP044381.1	-8.3286	49.7799	0.900097	2	n/a	-	.	.	.	.	.	.	.	.	.	.	.	.	.	.	.	.	.	.	.	.	.	.	.	.	.	.	.	.	.	.	.	.	.	.	.	.	.	.	IncN/100/99.81/514	IncFIB(Mar)/100/99.32/439	IncHI1B/100/99.12/570	.	.
CP044377.1	-8.48743	49.8823	0.859391	2	n/a	-	.	.	.	.	.	.	.	.	.	.	.	.	.	.	.	.	.	.	.	.	.	.	.	.	.	.	.	.	.	.	.	.	.	.	.	.	.	.	IncN/100/100/514	IncHI1B/100/98.95/570	IncFIB(Mar)/100/100/439	.	.
CP043933.1	-7.44489	47.8858	1	2	n/a	3410	.	.	.	.	.	.	.	.	.	.	.	.	.	.	.	.	.	.	.	.	.	.	.	.	.	.	.	.	.	.	.	.	.	.	.	.	.	.	IncHI1B/100/100/570	IncFIB(Mar)/100/99.32/439	.	.	.
CP041935.1	-6.46536	46.66	1	2	n/a	719	.	.	.	.	.	.	.	.	.	.	.	.	.	.	.	.	.	.	.	.	.	.	.	.	.	.	.	.	.	.	.	.	.	.	.	.	.	.	IncHI1B/99.82/100/570	IncFIB(Mar)/100/99.32/439	.	.	.
CP041093.1	-7.92377	48.7404	1	2	n/a	3541	.	.	.	.	.	.	.	.	.	CTX-M-9-like	.	.	.	.	.	.	.	.	.	blaCTX-M-14	.	.	.	.	.	.	.	.	.	.	.	.	.	.	.	.	.	.	IncHI1B/100/99.47/570	IncFIB(Mar)/100/99.54/439	.	.	.
CP036336.1	-4.86047	49.9178	1	2	n/a	15	.	.	.	.	.	CTX-M-1-like	.	.	.	.	.	.	.	.	.	.	.	.	blaCTX-M-15	.	.	.	.	.	.	.	.	.	.	.	.	.	.	.	.	.	.	.	IncHI1B/100/100/570	.	.	.	.
CP034406.1	-5.83808	49.5566	1	2	n/a	14	.	.	.	.	.	CTX-M-1-like	.	.	.	.	.	NDM-like	.	OXA-1-like	.	.	.	.	blaCTX-M-15	.	.	.	.	.	.	.	.	blaOXA-1	.	.	.	.	.	.	.	.	.	.	IncFIB(Mar)/100/99.54/439	IncHI1B/100/100/570	.	.	.
CP034040.1	-11.6991	47.2646	0.714458	2	n/a	395	.	.	.	.	.	.	.	.	.	.	.	.	.	.	.	.	.	.	.	.	.	.	.	.	.	.	.	.	.	.	.	.	.	.	.	.	.	.	IncR/100/100/251	IncFIB(Mar)/100/99.32/439	.	.	.
CP032223.1	-10.0159	47.9933	1	2	n/a	147	.	.	.	.	.	.	.	.	.	.	.	.	.	.	.	.	.	.	.	.	.	.	.	.	.	.	.	.	.	.	.	.	.	.	.	.	.	.	IncHI1B/100/99.47/570	IncFIB(Mar)/100/99.54/439	.	.	.
CP032208.1	-5.69065	45.543	1	2	n/a	340	.	.	.	.	.	.	.	.	.	.	.	.	.	.	.	.	.	.	.	.	.	.	.	.	.	.	.	.	.	.	.	.	.	.	.	.	.	.	IncHI1B/100/99.82/570	.	.	.	.
CP031818.1	-5.10857	44.0497	1	2	n/a	253	.	.	.	.	.	.	.	.	.	.	.	.	.	.	.	.	.	.	.	.	.	.	.	.	.	.	.	.	.	.	.	.	.	.	.	.	.	.	Col440I/97.37/94.59/114	IncFIB(Mar)/100/100/439	.	.	.
CP031736.1	-4.40887	49.2757	1	2	n/a	14	.	.	.	.	.	.	.	.	.	.	.	NDM-like	.	OXA-1-like	.	.	.	.	.	.	.	.	.	.	.	.	blaNDM-1	blaOXA-1	.	.	.	.	.	.	.	.	.	.	IncFIB(Mar)/100/99.54/439	IncHI1B/100/100/570	.	.	.
CP031582.1	-10.9688	49.6178	0.810694	2	n/a	422	.	.	.	.	.	.	.	.	.	.	.	.	.	.	.	.	.	.	.	.	.	.	.	.	.	.	.	.	.	.	.	.	.	.	.	.	.	.	IncFIB(Mar)/100/99.54/439	IncHI1B/100/99.82/570	.	.	.
CP031580.1	-4.71696	46.0116	0.742865	2	n/a	422	.	.	.	.	.	.	.	.	.	.	.	.	.	.	.	.	.	.	.	.	.	.	.	.	.	.	.	.	.	.	.	.	.	.	.	.	.	.	.	.	.	.	.
CP031372.2	-9.31261	51.239	1	2	n/a	101	.	.	.	.	.	.	.	.	.	.	.	.	.	.	.	.	.	.	.	.	.	.	.	.	.	.	.	.	.	.	.	.	.	.	.	.	.	.	IncHI1B/100/99.47/570	IncFIB(Mar)/100/99.54/439	.	.	.
CP028929.1	-5.85322	49.3394	1	2	n/a	14	.	.	.	.	.	.	.	.	.	.	.	NDM-like	.	OXA-1-like	.	.	.	.	.	.	.	.	.	.	.	.	blaNDM-1	blaOXA-1	.	.	.	.	.	.	.	.	.	.	IncFIB(Mar)/100/99.54/439	IncHI1B/100/100/570	.	.	.
CP027156.1	-8.37263	48.0309	1	2	n/a	258	.	.	.	.	.	.	.	.	.	.	.	.	.	.	.	.	.	.	.	.	.	.	.	.	.	.	.	.	.	.	.	.	.	.	.	.	.	.	IncFIB(Mar)/100/99.32/439	IncHI1B/100/99.82/570	.	.	.
CP026398.1	-8.23304	46.8429	1	2	n/a	252	.	.	.	.	.	.	.	.	.	.	.	.	.	.	.	.	.	.	.	.	.	.	.	.	.	.	.	.	.	.	.	.	.	.	.	.	.	.	IncHI1B/100/99.65/570	IncFIB(Mar)/100/99.77/439	.	.	.
CP026186.1	-7.46693	43.9125	1	2	n/a	359	.	.	.	.	.	.	.	.	.	.	.	.	.	.	.	.	.	.	.	.	.	.	.	.	.	.	.	.	.	.	.	.	.	.	.	.	.	.	IncFIB(Mar)/100/99.77/439	.	.	.	.
CP026172.1	-8.23626	46.8706	1	2	n/a	252	.	.	.	.	.	.	.	.	.	.	.	.	.	.	.	.	.	.	.	.	.	.	.	.	.	.	.	.	.	.	.	.	.	.	.	.	.	.	IncFIB(Mar)/100/99.77/439	IncHI1B/100/99.65/570	.	.	.
CP024517.1	-2.25469	45.7242	1	2	n/a	323	.	.	.	.	.	.	.	.	.	.	.	.	.	.	.	.	.	.	.	.	.	.	.	.	.	.	.	.	.	.	.	.	.	.	.	.	.	.	IncFIB(Mar)/100/95.44/439	.	.	.	.
CP024507.1	-7.33984	45.8194	1	2	n/a	323	.	.	.	.	.	.	.	.	.	.	.	.	.	.	.	.	.	.	.	.	.	.	.	.	.	.	.	.	.	.	.	.	.	.	.	.	.	.	IncFIB(Mar)/100/100/439	.	.	.	.
CP024501.1	-2.29936	45.7323	0.434466	2	n/a	323	.	.	.	.	.	.	.	.	.	.	.	.	.	.	.	.	.	.	.	.	.	.	.	.	.	.	.	.	.	.	.	.	.	.	.	.	.	.	IncFIB(Mar)/100/95.44/439	.	.	.	.
CP024497.1	-2.29929	45.7295	0.434289	2	n/a	323	.	.	.	.	.	.	.	.	.	.	.	.	.	.	.	.	.	.	.	.	.	.	.	.	.	.	.	.	.	.	.	.	.	.	.	.	.	.	IncFIB(Mar)/100/95.44/439	.	.	.	.
CP022612.1	-5.51842	49.6727	1	2	n/a	14	.	.	.	.	.	CTX-M-1-like	.	.	.	.	.	NDM-like	.	.	.	.	OXA-9-like	SHV-like	blaCTX-M-15	.	.	.	.	.	.	.	blaNDM-1	.	.	.	.	blaOXA-9	.	.	.	.	blaSHV-11	.	IncHI1B/100/100/570	IncR/100/100/251	IncFIA(HI1)/99.74/98.45/388	IncFIB(Mar)/100/99.54/439	.
CP021699.1	-7.77115	49.3053	1	2	n/a	163	.	.	.	.	.	.	.	.	.	.	.	NDM-like	.	OXA-1-like	.	.	.	SHV-like	.	.	.	.	.	.	.	.	blaNDM-1	blaOXA-1	.	.	.	.	.	.	.	.	.	.	IncFIB(Mar)/100/100/439	IncHI1B/100/99.47/570	.	.	.
CP020902.1	-5.15712	48.9945	1	2	n/a	11	.	.	.	.	.	CTX-M-1-like	.	.	.	.	.	NDM-like	.	.	.	.	.	.	blaCTX-M-15	.	.	.	.	.	.	.	blaNDM-1	.	.	.	.	.	.	.	.	.	.	.	IncHI1B/100/100/570	IncFII(K)/100/97.3/148	IncR/100/100/251	IncFIB(Mar)/100/100/439	.
CP020854.1	-5.8491	49.3481	1	2	n/a	14	.	.	.	.	.	.	.	.	.	.	.	NDM-like	.	OXA-1-like	.	.	.	.	.	.	.	.	.	.	.	.	blaNDM-1	blaOXA-1	.	.	.	.	.	.	.	.	.	.	IncHI1B/100/100/570	IncFIB(Mar)/100/99.54/439	.	.	.
CP020068.1	-5.74279	49.1645	1	2	n/a	14	.	.	.	.	.	.	.	.	.	.	.	NDM-like	.	.	.	.	.	SHV-like	.	.	.	.	.	.	.	.	blaNDM-1	.	.	.	.	.	.	.	.	.	blaSHV-11	.	IncFIB(Mar)/100/99.54/439	IncHI1B/100/100/570	.	.	.
CP018720.1	-9.25158	46.7468	1	2	n/a	147	.	.	.	.	.	.	.	.	.	.	.	.	.	.	.	.	.	.	.	.	.	.	.	.	.	.	.	.	.	.	.	.	.	.	.	.	.	.	IncHI1B/100/99.47/570	IncFIB(Mar)/100/99.32/439	.	.	.
CP018714.1	-9.25276	46.7502	1	2	n/a	147	.	.	.	.	.	.	.	.	.	.	.	.	.	.	.	.	.	.	.	.	.	.	.	.	.	.	.	.	.	.	.	.	.	.	.	.	.	.	IncHI1B/100/99.47/570	IncFIB(Mar)/100/99.32/439	.	.	.
CP018708.1	-9.25151	46.7504	1	2	n/a	147	.	.	.	.	.	.	.	.	.	.	.	.	.	.	.	.	.	.	.	.	.	.	.	.	.	.	.	.	.	.	.	.	.	.	.	.	.	.	IncHI1B/100/99.47/570	IncFIB(Mar)/100/99.32/439	.	.	.
CP018702.1	-9.25331	46.7483	1	2	n/a	147	.	.	.	.	.	.	.	.	.	.	.	.	.	.	.	.	.	.	.	.	.	.	.	.	.	.	.	.	.	.	.	.	.	.	.	.	.	.	IncHI1B/100/99.47/570	IncFIB(Mar)/100/99.32/439	.	.	.
CP018696.1	-9.25164	46.7468	1	2	n/a	147	.	.	.	.	.	.	.	.	.	.	.	.	.	.	.	.	.	.	.	.	.	.	.	.	.	.	.	.	.	.	.	.	.	.	.	.	.	.	IncHI1B/100/99.47/570	IncFIB(Mar)/100/99.32/439	.	.	.
CP018687.1	-9.2525	46.7479	1	2	n/a	147	.	.	.	.	.	.	.	.	.	.	.	.	.	.	.	.	.	.	.	.	.	.	.	.	.	.	.	.	.	.	.	.	.	.	.	.	.	.	IncFIB(Mar)/100/99.32/439	IncHI1B/100/99.47/570	.	.	.
CP018339.1	-10.11	46.4631	1	2	n/a	23	.	.	.	.	.	.	.	.	.	.	.	.	.	.	.	.	.	.	.	.	.	.	.	.	.	.	.	.	.	.	.	.	.	.	.	.	.	.	IncFIB(Mar)/100/99.54/439	.	.	.	.
CP018313.1	-9.26831	46.7577	1	2	n/a	147	.	.	.	.	.	.	.	.	.	.	.	.	.	.	.	.	.	.	.	.	.	.	.	.	.	.	.	.	.	.	.	.	.	.	.	.	.	.	IncFIB(Mar)/100/99.32/439	IncHI1B/100/99.47/570	.	.	.
CP017986.1	-9.25173	46.7499	1	2	n/a	147	.	.	.	.	.	.	.	.	.	.	.	.	.	.	.	.	.	.	.	.	.	.	.	.	.	.	.	.	.	.	.	.	.	.	.	.	.	.	IncFIB(Mar)/100/99.32/439	IncHI1B/100/99.47/570	.	.	.
CP016921.1	-5.85361	49.3393	1	2	n/a	14	.	.	.	.	.	.	.	.	.	.	.	NDM-like	.	OXA-1-like	.	.	.	.	.	.	.	.	.	.	.	.	blaNDM-1	blaOXA-1	.	.	.	.	.	.	.	.	.	.	IncFIB(Mar)/100/99.54/439	IncHI1B/100/100/570	.	.	.
CP015501.1	-6.15646	45.6822	1	2	n/a	147	.	.	.	.	.	.	.	.	.	.	.	.	.	.	.	.	.	.	.	.	.	.	.	.	.	.	.	.	.	.	.	.	.	.	.	.	.	.	IncHI1B/100/99.82/570	IncFIB(Mar)/100/99.54/439	.	.	.
CP012754.1	-5.92118	49.1838	1	2	n/a	14	.	.	.	.	.	.	.	.	.	.	.	NDM-like	.	.	.	.	.	.	.	.	.	.	.	.	.	.	blaNDM-1	.	.	.	.	.	.	.	.	.	.	.	IncFIB(Mar)/100/99.54/439	IncHI1B/100/100/570	.	.	.
CP011314.1	-9.48547	49.5225	0.994005	2	n/a	514	.	.	.	.	.	CTX-M-1-like	.	.	.	.	.	.	.	OXA-1-like	.	.	.	.	blaCTX-M-15	.	.	.	.	.	.	.	.	blaOXA-1	.	.	.	.	.	.	.	.	.	.	IncFIB(Mar)/100/100/439	IncHI1B/100/99.47/570	IncQ1/66.46/100/796	.	.
CP008933.1	-6.18408	49.1837	1	2	n/a	15	.	.	.	.	.	CTX-M-1-like	.	.	.	.	.	NDM-like	.	OXA-1-like	.	.	.	.	blaCTX-M-15	.	.	.	.	.	.	.	blaNDM-1	blaOXA-1	.	.	.	.	.	.	.	.	.	.	IncHI1B/100/100/570	IncFIB(Mar)/100/100/439	.	.	.
CP006799.1	-5.85398	49.3396	1	2	n/a	14	.	.	.	.	.	.	.	.	.	.	.	NDM-like	.	OXA-1-like	.	.	.	.	.	.	.	.	.	.	.	.	blaNDM-1	blaOXA-1	.	.	.	.	.	.	.	.	.	.	IncFIB(Mar)/100/99.54/439	IncHI1B/100/100/570	.	.	.
CP004000.1	-4.93183	47.8188	1	2	n/a	442	.	.	.	.	.	.	.	CTX-M-2-like	.	.	.	.	.	.	.	.	OXA-9-like	SHV-like	.	.	.	.	.	.	.	.	.	.	.	.	.	blaOXA-9	.	.	.	.	.	blaSHV-12	IncFIB(Mar)/100/100/439	IncHI1B/100/99.82/570	.	.	.
AP024789.1	-10.0455	45.3374	0.975218	2	n/a	258	.	.	.	.	.	.	.	.	.	.	.	.	.	.	.	.	.	.	.	.	.	.	.	.	.	.	.	.	.	.	.	.	.	.	.	.	.	.	IncFIB(Mar)/100/99.32/439	.	.	.	.
AP024785.1	-10.0478	45.3343	0.973358	2	n/a	258	.	.	.	.	.	.	.	.	.	.	.	.	.	.	.	.	.	.	.	.	.	.	.	.	.	.	.	.	.	.	.	.	.	.	.	.	.	.	IncFIB(Mar)/100/99.32/439	.	.	.	.
AP023338.1	-7.27483	48.0646	1	2	n/a	273	.	.	.	.	.	.	.	.	.	.	.	.	.	.	.	.	.	.	.	.	.	.	.	.	.	.	.	.	.	.	.	.	.	.	.	.	.	.	IncHI1B/100/100/570	IncFIB(Mar)/100/99.32/439	.	.	.
AP018748.1	-5.81502	49.5685	1	2	n/a	14	.	.	.	.	.	CTX-M-1-like	.	.	.	.	.	NDM-like	.	OXA-1-like	.	.	.	.	blaCTX-M-15	.	.	.	.	.	.	.	.	blaOXA-1	.	.	.	.	.	.	.	.	.	.	IncHI1B/100/100/570	IncFIB(Mar)/100/99.54/439	.	.	.
862392_p2	-7.40271	14.574	1	3	Georgia	25	.	.	.	.	.	.	.	.	.	.	.	NDM-like	.	.	.	.	.	.	.	.	.	.	.	.	.	.	.	.	.	.	.	.	.	.	.	.	.	.	IncX3/100/100/374	.	.	.	.
517485_p4	-7.64361	12.3558	0.642004	3	Jordan	1399	.	.	.	.	.	.	.	.	.	.	.	.	.	.	.	.	.	SHV-like	.	.	.	.	.	.	.	.	.	.	.	.	.	.	.	.	.	.	blaSHV-11	.	IncX3/100/100/374	.	.	.	.
515432_p4	-7.63762	12.3518	0.642987	3	Jordan	1399	.	.	.	.	.	.	.	.	.	.	.	.	.	.	.	.	.	SHV-like	.	.	.	.	.	.	.	.	.	.	.	.	.	.	.	.	.	.	.	blaSHV-12	IncX3/100/100/374	.	.	.	.
23620_p2	-9.17011	15.0548	0.522462	3	United States	23	.	.	.	.	.	.	.	.	.	.	.	.	.	.	.	.	.	.	.	.	.	.	.	.	.	.	.	.	.	.	.	.	.	.	.	.	.	.	.	.	.	.	.
OW969943.1	-8.10245	12.7379	0.640656	3	n/a	11	.	.	.	.	.	.	.	.	.	.	.	.	.	.	.	.	.	.	.	.	.	.	.	.	.	.	.	.	.	.	.	.	.	.	.	.	.	.	IncX3/100/100/374	.	.	.	.
OW969868.1	-6.45929	13.1601	1	3	n/a	512	.	.	.	.	.	.	.	.	.	.	.	.	.	.	.	.	.	SHV-like	.	.	.	.	.	.	.	.	.	.	.	.	.	.	.	.	.	.	blaSHV-11	.	IncX3/100/100/374	.	.	.	.
OW967613.1	-6.45962	13.1611	1	3	n/a	512	.	.	.	.	.	.	.	.	.	.	.	.	.	.	.	.	.	SHV-like	.	.	.	.	.	.	.	.	.	.	.	.	.	.	.	.	.	.	blaSHV-11	.	IncX3/100/100/374	.	.	.	.
OW967604.1	-5.12268	13.9416	1	3	n/a	512	.	.	.	.	.	.	.	.	.	.	.	.	.	.	.	.	.	SHV-like	.	.	.	.	.	.	.	.	.	.	.	.	.	.	.	.	.	.	blaSHV-11	.	IncX3/100/100/374	.	.	.	.
OW967583.1	-5.11859	13.9419	1	3	n/a	512	.	.	.	.	.	.	.	.	.	.	.	.	.	.	.	.	.	SHV-like	.	.	.	.	.	.	.	.	.	.	.	.	.	.	.	.	.	.	blaSHV-11	.	IncX3/100/100/374	.	.	.	.
OW967425.1	-5.30301	13.9192	0.905777	3	n/a	512	.	.	.	.	.	.	.	.	.	.	.	.	.	.	.	.	.	SHV-like	.	.	.	.	.	.	.	.	.	.	.	.	.	.	.	.	.	.	blaSHV-11	.	IncX3/100/100/374	.	.	.	.
OW967418.1	-4.76997	15.1344	1	3	n/a	512	.	.	.	.	.	.	.	.	.	.	KPC-like	.	.	.	.	.	.	.	.	.	.	.	blaKPC-3	.	.	.	.	.	.	.	.	.	.	.	.	.	.	.	IncX3/100/100/374	IncFII(K)/100/97.97/148	.	.	.
OW967370.1	-6.45962	13.1611	1	3	n/a	512	.	.	.	.	.	.	.	.	.	.	.	.	.	.	.	.	.	SHV-like	.	.	.	.	.	.	.	.	.	.	.	.	.	.	.	.	.	.	blaSHV-11	.	IncX3/100/100/374	.	.	.	.
OW967296.1	-4.84434	15.1358	0.577815	3	n/a	512	.	.	.	.	.	.	.	.	.	.	KPC-like	.	.	.	.	.	.	.	.	.	.	.	blaKPC-3	.	.	.	.	.	.	.	.	.	.	.	.	.	.	.	IncX3/100/100/374	IncFII(K)/100/97.97/148	.	.	.
OW967253.1	-6.45962	13.1611	1	3	n/a	512	.	.	.	.	.	.	.	.	.	.	.	.	.	.	.	.	.	SHV-like	.	.	.	.	.	.	.	.	.	.	.	.	.	.	.	.	.	.	blaSHV-11	.	IncX3/100/100/374	.	.	.	.
OW967234.1	-5.27306	13.9039	0.904884	3	n/a	512	.	.	.	.	.	.	.	.	.	.	.	.	.	.	.	.	.	SHV-like	.	.	.	.	.	.	.	.	.	.	.	.	.	.	.	.	.	.	blaSHV-11	.	IncX3/100/100/374	.	.	.	.
OW967193.1	-6.45962	13.1611	1	3	n/a	512	.	.	.	.	.	.	.	.	.	.	.	.	.	.	.	.	.	SHV-like	.	.	.	.	.	.	.	.	.	.	.	.	.	.	.	.	.	.	blaSHV-11	.	IncX3/100/100/374	.	.	.	.
OW967170.1	-6.45962	13.1611	1	3	n/a	512	.	.	.	.	.	.	.	.	.	.	.	.	.	.	.	.	.	SHV-like	.	.	.	.	.	.	.	.	.	.	.	.	.	.	.	.	.	.	blaSHV-11	.	IncX3/100/100/374	.	.	.	.
OW848857.1	-9.41401	11.761	0.386034	3	n/a	11	.	.	.	.	.	.	.	.	.	.	.	.	.	.	.	.	.	.	.	.	.	.	.	.	.	.	.	.	.	.	.	.	.	.	.	.	.	.	.	.	.	.	.
OW848811.1	-9.37242	11.7798	0.392318	3	n/a	11	.	.	.	.	.	.	.	.	.	.	.	.	.	.	.	.	.	.	.	.	.	.	.	.	.	.	.	.	.	.	.	.	.	.	.	.	.	.	.	.	.	.	.
OW848806.1	-8.17369	12.606	0.650519	3	n/a	11	.	.	.	.	.	.	.	.	.	.	.	.	.	.	.	.	.	.	.	.	.	.	.	.	.	.	.	.	.	.	.	.	.	.	.	.	.	.	IncX3/100/100/374	.	.	.	.
LR130550.1	-5.85325	13.6748	1	3	n/a	258	.	.	.	.	.	.	.	.	.	.	.	.	.	.	.	.	.	SHV-like	.	.	.	.	.	.	.	.	.	.	.	.	.	.	.	.	.	.	.	blaSHV-12	IncX3/100/100/374	.	.	.	.
CP122474.1	-7.97417	15.2268	1	3	n/a	16	.	.	.	.	.	.	.	.	.	.	.	NDM-like	.	.	.	.	.	.	.	.	.	.	.	.	.	.	.	.	.	.	.	.	.	.	.	.	.	.	IncX3/100/100/374	.	.	.	.
CP122465.1	-7.97053	15.2277	1	3	n/a	16	.	.	.	.	.	.	.	.	.	.	.	NDM-like	.	.	.	.	.	.	.	.	.	.	.	.	.	.	.	.	.	.	.	.	.	.	.	.	.	.	IncX3/100/100/374	.	.	.	.
CP115934.1	-6.69794	12.1753	0.70348	3	n/a	258	.	.	.	.	.	.	.	.	.	.	.	.	.	.	.	.	.	SHV-like	.	.	.	.	.	.	.	.	.	.	.	.	.	.	.	.	.	.	.	blaSHV-12	IncX3/100/100/374	.	.	.	.
CP115703.1	-5.92098	13.7064	1	3	n/a	258	.	.	.	.	.	.	.	.	.	.	.	.	.	.	.	.	.	SHV-like	.	.	.	.	.	.	.	.	.	.	.	.	.	.	.	.	.	.	.	.	IncX3/100/100/374	.	.	.	.
CP110965.1	-6.45348	13.144	1	3	n/a	512	.	.	.	.	.	.	.	.	.	.	.	.	.	.	.	.	.	SHV-like	.	.	.	.	.	.	.	.	.	.	.	.	.	.	.	.	.	.	blaSHV-11	.	IncX3/100/100/374	.	.	.	.
CP110960.1	-6.45348	13.144	1	3	n/a	512	.	.	.	.	.	.	.	.	.	.	.	.	.	.	.	.	.	SHV-like	.	.	.	.	.	.	.	.	.	.	.	.	.	.	.	.	.	.	blaSHV-11	.	IncX3/100/100/374	.	.	.	.
CP110955.1	-6.45348	13.144	1	3	n/a	512	.	.	.	.	.	.	.	.	.	.	.	.	.	.	.	.	.	SHV-like	.	.	.	.	.	.	.	.	.	.	.	.	.	.	.	.	.	.	blaSHV-11	.	IncX3/100/100/374	.	.	.	.
CP110950.1	-6.36629	13.1169	1	3	n/a	512	.	.	.	.	.	.	.	.	.	.	.	.	.	.	.	.	.	SHV-like	.	.	.	.	.	.	.	.	.	.	.	.	.	.	.	.	.	.	blaSHV-11	.	IncX3/100/100/374	.	.	.	.
CP110945.1	-6.46054	13.1634	1	3	n/a	512	.	.	.	.	.	.	.	.	.	.	.	.	.	.	.	.	.	SHV-like	.	.	.	.	.	.	.	.	.	.	.	.	.	.	.	.	.	.	blaSHV-11	.	IncX3/100/100/374	.	.	.	.
CP110939.1	-6.43719	13.2816	1	3	n/a	512	.	.	.	.	.	.	.	.	.	.	.	.	.	.	.	.	.	SHV-like	.	.	.	.	.	.	.	.	.	.	.	.	.	.	.	.	.	.	blaSHV-11	.	IncX3/100/100/374	.	.	.	.
CP110663.1	-7.29505	14.6813	1	3	n/a	20	.	.	.	.	.	.	.	.	.	.	.	NDM-like	.	.	.	.	.	.	.	.	.	.	.	.	.	.	.	.	.	.	.	.	.	.	.	.	.	.	IncX3/100/100/374	.	.	.	.
CP106917.1	-7.49226	15.0497	1	3	n/a	11	.	.	.	.	.	.	.	.	.	.	.	NDM-like	.	.	.	.	.	.	.	.	.	.	.	.	.	.	.	.	.	.	.	.	.	.	.	.	.	.	IncX3/100/100/374	.	.	.	.
CP106910.1	-7.50884	15.1713	1	3	n/a	11	.	.	.	.	.	.	.	.	.	.	.	NDM-like	.	.	.	.	.	.	.	.	.	.	.	.	.	.	.	.	.	.	.	.	.	.	.	.	.	.	IncX3/100/100/374	.	.	.	.
CP106656.1	-8.21859	16.3204	0.529693	3	n/a	37	.	.	.	.	.	.	.	.	.	.	.	NDM-like	.	.	.	.	.	.	.	.	.	.	.	.	.	.	.	.	.	.	.	.	.	.	.	.	.	.	IncX3/100/100/374	.	.	.	.
CP104800.1	-7.84166	13.7419	0.861589	3	n/a	16	.	.	.	.	.	.	.	.	.	.	.	.	.	.	.	OXA-48-like	.	.	.	.	.	.	.	.	.	.	.	.	.	.	.	.	.	.	.	.	.	.	ColKP3/81.79/100/280	IncX3/100/100/374	.	.	.
CP104795.1	-6.02629	15.2636	0.866173	3	n/a	16	.	.	.	.	.	.	.	.	.	.	.	NDM-like	.	.	.	.	.	SHV-like	.	.	.	.	.	.	.	.	blaNDM-1	.	.	.	.	.	.	.	.	.	.	blaSHV-12	IncX3/100/100/374	.	.	.	.
CP103703.1	-8.42394	7.08785	1	3	n/a	307	.	.	.	.	.	.	.	.	.	.	.	.	.	.	.	.	.	.	.	.	.	.	.	.	.	.	.	.	.	.	.	.	.	.	.	.	.	.	ColpVC/98.96/96.86/193	.	.	.	.
CP103320.1	-7.32073	14.7778	1	3	n/a	11	.	.	.	.	.	.	.	.	.	.	.	NDM-like	.	.	.	.	.	.	.	.	.	.	.	.	.	.	.	.	.	.	.	.	.	.	.	.	.	.	IncX3/100/100/374	.	.	.	.
CP102892.1	-7.25186	14.8218	1	3	n/a	766	.	.	.	.	.	.	.	.	.	.	.	NDM-like	.	.	.	.	.	.	.	.	.	.	.	.	.	.	.	.	.	.	.	.	.	.	.	.	.	.	IncX3/100/100/374	.	.	.	.
CP102890.1	-7.51804	14.9974	1	3	n/a	766	.	.	.	.	.	.	.	.	.	.	.	NDM-like	.	.	.	.	.	.	.	.	.	.	.	.	.	.	.	.	.	.	.	.	.	.	.	.	.	.	IncX3/100/100/374	.	.	.	.
CP102887.1	-7.04369	15.7487	0.861508	3	n/a	37	.	.	.	.	.	.	.	.	.	.	.	NDM-like	.	.	.	.	.	.	.	.	.	.	.	.	.	.	.	.	.	.	.	.	.	.	.	.	.	.	IncX3/100/100/374	.	.	.	.
CP102881.1	-7.04479	15.7506	0.860385	3	n/a	37	.	.	.	.	.	.	.	.	.	.	.	NDM-like	.	.	.	.	.	.	.	.	.	.	.	.	.	.	.	.	.	.	.	.	.	.	.	.	.	.	IncX3/100/100/374	.	.	.	.
CP102875.1	-7.42035	14.6799	1	3	n/a	495	.	.	.	.	.	.	.	.	.	.	.	NDM-like	.	.	.	.	.	.	.	.	.	.	.	.	.	.	.	.	.	.	.	.	.	.	.	.	.	.	IncX3/100/100/374	.	.	.	.
CP102689.1	-7.0789	15.1372	1	3	n/a	11	.	.	.	.	.	.	.	.	.	.	.	NDM-like	.	.	.	.	.	.	.	.	.	.	.	.	.	.	.	.	.	.	.	.	.	.	.	.	.	.	IncX3/100/100/374	.	.	.	.
CP102080.1	-7.84579	13.7412	0.861011	3	n/a	273	.	.	.	.	.	.	.	.	.	.	.	.	.	.	.	OXA-48-like	.	.	.	.	.	.	.	.	.	.	.	.	.	.	.	.	.	.	.	.	.	.	IncX3/100/100/374	ColKP3/81.79/100/280	.	.	.
CP101837.1	-7.23011	14.9769	1	3	n/a	11	.	.	.	.	.	.	.	.	.	.	.	NDM-like	.	.	.	.	.	.	.	.	.	.	.	.	.	.	.	.	.	.	.	.	.	.	.	.	.	.	IncX3/100/100/374	.	.	.	.
CP101780.1	-6.36403	14.6338	1	3	n/a	11	.	.	.	.	.	.	.	.	.	.	.	NDM-like	.	.	.	.	.	SHV-like	.	.	.	.	.	.	.	.	blaNDM-1	.	.	.	.	.	.	.	.	.	.	blaSHV-12	IncX3/100/100/374	.	.	.	.
CP101550.1	-6.2803	14.8315	0.955974	3	n/a	437	.	.	.	.	.	.	.	.	.	.	.	NDM-like	.	.	.	.	.	SHV-like	.	.	.	.	.	.	.	.	blaNDM-1	.	.	.	.	.	.	.	.	.	.	blaSHV-12	IncX3/100/100/374	.	.	.	.
CP100543.1	-7.54753	12.508	1	3	n/a	20	.	.	.	.	.	.	.	.	.	.	.	.	.	.	.	.	.	SHV-like	.	.	.	.	.	.	.	.	.	.	.	.	.	.	.	.	.	.	.	blaSHV-12	IncX3/100/100/374	.	.	.	.
CP100524.1	-7.47191	12.6674	0.811358	3	n/a	427	.	.	.	.	.	.	.	.	.	.	.	.	.	.	.	.	.	SHV-like	.	.	.	.	.	.	.	.	.	.	.	.	.	.	.	.	.	.	.	blaSHV-12	IncX3/100/100/374	.	.	.	.
CP100517.1	-7.43838	12.4377	0.714773	3	n/a	2053	.	.	.	.	.	.	.	.	.	.	.	.	.	.	.	.	.	SHV-like	.	.	.	.	.	.	.	.	.	.	.	.	.	.	.	.	.	.	.	blaSHV-12	IncX3/100/100/374	.	.	.	.
CP100513.1	-7.54744	12.5075	1	3	n/a	2053	.	.	.	.	.	.	.	.	.	.	.	.	.	.	.	.	.	SHV-like	.	.	.	.	.	.	.	.	.	.	.	.	.	.	.	.	.	.	.	blaSHV-12	IncX3/100/100/374	.	.	.	.
CP100481.1	-7.46423	12.6734	0.81795	3	n/a	427	.	.	.	.	.	.	.	.	.	.	.	.	.	.	.	.	.	SHV-like	.	.	.	.	.	.	.	.	.	.	.	.	.	.	.	.	.	.	.	blaSHV-12	IncX3/100/100/374	.	.	.	.
CP098359.1	-6.47532	13.4719	1	3	n/a	258	.	.	.	.	.	.	.	.	.	.	.	.	.	.	.	.	.	SHV-like	.	.	.	.	.	.	.	.	.	.	.	.	.	.	.	.	.	.	.	blaSHV-12	IncX3/100/100/374	.	.	.	.
CP097653.1	-6.55448	14.5138	1	3	n/a	23	.	.	.	.	.	.	.	.	.	.	.	NDM-like	.	.	.	.	.	SHV-like	.	.	.	.	.	.	.	.	blaNDM-1	.	.	.	.	.	.	.	.	.	.	blaSHV-12	IncX3/100/100/374	.	.	.	.
CP095779.1	-7.84631	13.7415	0.860694	3	n/a	512	.	.	.	.	.	.	.	.	.	.	.	.	.	.	.	OXA-48-like	.	.	.	.	.	.	.	.	.	.	.	.	.	.	.	.	.	.	.	.	.	.	IncX3/100/100/374	ColKP3/81.79/100/280	.	.	.
CP094915.1	-3.56443	12.8167	0.409167	3	n/a	258	.	.	.	.	.	.	.	.	.	.	.	.	.	.	.	.	.	SHV-like	.	.	.	.	.	.	.	.	.	.	.	.	.	.	.	.	.	.	.	blaSHV-12	IncX3/100/100/374	.	.	.	.
CP094514.1	-7.07694	15.7365	0.856752	3	n/a	4523	.	.	.	.	.	.	.	.	.	.	.	NDM-like	.	.	.	.	.	.	.	.	.	.	.	.	.	.	.	.	.	.	.	.	.	.	.	.	.	.	IncX3/100/100/374	.	.	.	.
CP092904.1	-5.50302	16.0254	0.536137	3	n/a	1	.	.	.	.	.	.	.	.	.	.	.	NDM-like	.	.	.	.	.	SHV-like	.	.	.	.	.	.	.	.	blaNDM-1	.	.	.	.	.	.	.	.	.	.	blaSHV-12	IncX3/100/100/374	.	.	.	.
CP092769.1	-6.52281	13.3844	1	3	n/a	512	.	.	.	.	.	.	.	.	.	.	.	.	.	.	.	.	.	SHV-like	.	.	.	.	.	.	.	.	.	.	.	.	.	.	.	.	.	.	blaSHV-11	.	IncX3/100/100/374	.	.	.	.
CP092763.1	-5.16385	15.1631	0.628818	3	n/a	512	.	.	.	.	.	.	.	.	.	.	KPC-like	.	.	.	.	.	.	.	.	.	.	.	blaKPC-3	.	.	.	.	.	.	.	.	.	.	.	.	.	.	.	IncX3/100/100/374	.	.	.	.
CP092757.1	-6.43407	13.0946	1	3	n/a	512	.	.	.	.	.	.	.	.	.	.	.	.	.	.	.	.	.	SHV-like	.	.	.	.	.	.	.	.	.	.	.	.	.	.	.	.	.	.	blaSHV-11	.	IncX3/100/100/374	.	.	.	.
CP092650.1	-7.33118	14.5284	1	3	n/a	17	.	.	.	.	.	.	.	.	.	.	.	NDM-like	.	.	.	.	.	.	.	.	.	.	.	.	.	.	.	.	.	.	.	.	.	.	.	.	.	.	IncX3/100/100/374	.	.	.	.
CP091980.1	-6.30226	14.7932	0.981607	3	n/a	23	.	.	.	.	.	.	.	.	.	.	.	NDM-like	.	.	.	.	.	SHV-like	.	.	.	.	.	.	.	.	blaNDM-1	.	.	.	.	.	.	.	.	.	.	blaSHV-12	IncX3/100/100/374	.	.	.	.
CP091052.1	-6.13434	14.9937	0.863464	3	n/a	464	.	.	.	.	.	.	.	.	.	.	.	NDM-like	.	.	.	.	.	SHV-like	.	.	.	.	.	.	.	.	blaNDM-1	.	.	.	.	.	.	.	.	.	.	blaSHV-12	IncX3/100/100/374	.	.	.	.
CP090934.1	-7.95426	10.5701	1	3	n/a	340	.	.	.	.	.	.	.	.	.	.	KPC-like	.	.	.	.	.	.	.	.	.	.	blaKPC-2	.	.	.	.	.	.	.	.	.	.	.	.	.	.	.	.	IncX3/100/99.73/374	IncU/96.28/99.45/565	.	.	.
CP090129.1	-6.41098	14.6491	1	3	n/a	15	.	.	.	.	.	.	.	.	.	.	.	NDM-like	.	.	.	.	.	SHV-like	.	.	.	.	.	.	.	.	blaNDM-1	.	.	.	.	.	.	.	.	.	.	blaSHV-12	IncX3/100/100/374	.	.	.	.
CP089991.1	-8.03088	16.1554	0.603827	3	n/a	2407	.	.	.	.	.	.	.	.	.	.	.	NDM-like	.	.	.	.	.	.	.	.	.	.	.	.	.	.	.	.	.	.	.	.	.	.	.	.	.	.	IncX3/100/100/374	.	.	.	.
CP089987.1	-7.49422	15.0595	1	3	n/a	35	.	.	.	.	.	.	.	.	.	.	.	NDM-like	.	.	.	.	.	.	.	.	.	.	.	.	.	.	.	.	.	.	.	.	.	.	.	.	.	.	IncX3/100/100/374	.	.	.	.
CP089430.1	-7.92877	10.651	0.340828	3	n/a	340	.	.	.	.	.	.	.	.	.	.	KPC-like	.	.	.	.	.	.	.	.	.	.	blaKPC-2	.	.	.	.	.	.	.	.	.	.	.	.	.	.	.	.	IncX3/100/99.73/374	IncU/96.28/99.45/565	.	.	.
CP084105.1	-6.21709	14.8929	1	3	n/a	1383	.	.	.	.	.	.	.	.	.	.	.	NDM-like	.	.	.	.	.	SHV-like	.	.	.	.	.	.	.	.	blaNDM-1	.	.	.	.	.	.	.	.	.	.	blaSHV-12	IncX3/100/100/374	.	.	.	.
CP083009.1	-6.18125	13.1248	1	3	n/a	258	.	.	.	.	.	.	.	.	.	.	.	.	.	.	.	.	.	SHV-like	.	.	.	.	.	.	.	.	.	.	.	.	.	.	.	.	.	.	.	blaSHV-12	IncX3/100/100/374	.	.	.	.
CP081819.1	-7.43181	14.6536	1	3	n/a	5214	.	.	.	.	.	.	.	.	.	.	.	NDM-like	.	.	.	.	.	.	.	.	.	.	.	.	.	.	.	.	.	.	.	.	.	.	.	.	.	.	IncX3/100/100/374	.	.	.	.
CP080754.1	-5.4417	13.3373	1	3	n/a	258	.	.	.	.	.	.	.	.	.	.	KPC-like	.	.	.	.	.	.	SHV-like	.	.	.	blaKPC-2	.	.	.	.	.	.	.	.	.	.	.	.	.	.	.	blaSHV-12	IncX3/100/100/374	.	.	.	.
CP080747.1	-5.4417	13.3373	1	3	n/a	258	.	.	.	.	.	.	.	.	.	.	KPC-like	.	.	.	.	.	.	SHV-like	.	.	.	blaKPC-2	.	.	.	.	.	.	.	.	.	.	.	.	.	.	.	blaSHV-12	IncX3/100/100/374	.	.	.	.
CP080740.1	-5.4417	13.3373	1	3	n/a	258	.	.	.	.	.	.	.	.	.	.	KPC-like	.	.	.	.	.	.	SHV-like	.	.	.	blaKPC-2	.	.	.	.	.	.	.	.	.	.	.	.	.	.	.	blaSHV-12	IncX3/100/100/374	.	.	.	.
CP080736.1	-5.4417	13.3373	1	3	n/a	258	.	.	.	.	.	.	.	.	.	.	KPC-like	.	.	.	.	.	.	SHV-like	.	.	.	blaKPC-2	.	.	.	.	.	.	.	.	.	.	.	.	.	.	.	blaSHV-12	IncX3/100/100/374	.	.	.	.
CP080732.1	-5.4417	13.3373	1	3	n/a	258	.	.	.	.	.	.	.	.	.	.	KPC-like	.	.	.	.	.	.	SHV-like	.	.	.	blaKPC-2	.	.	.	.	.	.	.	.	.	.	.	.	.	.	.	blaSHV-12	IncX3/100/100/374	.	.	.	.
CP080728.1	-5.4417	13.3373	1	3	n/a	258	.	.	.	.	.	.	.	.	.	.	KPC-like	.	.	.	.	.	.	SHV-like	.	.	.	blaKPC-2	.	.	.	.	.	.	.	.	.	.	.	.	.	.	.	blaSHV-12	IncX3/100/100/374	.	.	.	.
CP080724.1	-5.4417	13.3373	1	3	n/a	258	.	.	.	.	.	.	.	.	.	.	KPC-like	.	.	.	.	.	.	SHV-like	.	.	.	blaKPC-2	.	.	.	.	.	.	.	.	.	.	.	.	.	.	.	blaSHV-12	IncX3/100/100/374	.	.	.	.
CP080719.1	-8.80751	13.99	0.641839	3	n/a	258	.	.	.	.	.	.	.	.	.	.	KPC-like	.	.	.	.	.	.	.	.	.	.	blaKPC-2	.	.	.	.	.	.	.	.	.	.	.	.	.	.	.	.	IncX3/100/100/374	.	.	.	.
CP080714.1	-5.4417	13.3373	1	3	n/a	258	.	.	.	.	.	.	.	.	.	.	KPC-like	.	.	.	.	.	.	SHV-like	.	.	.	blaKPC-2	.	.	.	.	.	.	.	.	.	.	.	.	.	.	.	blaSHV-12	IncX3/100/100/374	.	.	.	.
CP080709.1	-5.07426	13.874	0.86399	3	n/a	258	.	.	.	.	.	.	.	.	.	.	KPC-like	.	.	.	.	.	.	SHV-like	.	.	.	blaKPC-2	.	.	.	.	.	.	.	.	.	.	.	.	.	.	.	blaSHV-12	IncX3/100/100/374	.	.	.	.
CP080705.1	-5.4417	13.3373	1	3	n/a	258	.	.	.	.	.	.	.	.	.	.	KPC-like	.	.	.	.	.	.	SHV-like	.	.	.	blaKPC-2	.	.	.	.	.	.	.	.	.	.	.	.	.	.	.	blaSHV-12	IncX3/100/100/374	.	.	.	.
CP080700.1	-5.4417	13.3373	1	3	n/a	258	.	.	.	.	.	.	.	.	.	.	KPC-like	.	.	.	.	.	.	SHV-like	.	.	.	blaKPC-2	.	.	.	.	.	.	.	.	.	.	.	.	.	.	.	blaSHV-12	IncX3/100/100/374	.	.	.	.
CP080695.1	-5.4417	13.3373	1	3	n/a	258	.	.	.	.	.	.	.	.	.	.	KPC-like	.	.	.	.	.	.	SHV-like	.	.	.	blaKPC-2	.	.	.	.	.	.	.	.	.	.	.	.	.	.	.	blaSHV-12	IncX3/100/100/374	.	.	.	.
CP080691.1	-6.56401	13.4429	1	3	n/a	258	.	.	.	.	.	.	.	.	.	.	.	.	.	.	.	.	.	SHV-like	.	.	.	.	.	.	.	.	.	.	.	.	.	.	.	.	.	.	blaSHV-11	.	IncX3/100/100/374	.	.	.	.
CP080686.1	-5.4417	13.3373	1	3	n/a	258	.	.	.	.	.	.	.	.	.	.	KPC-like	.	.	.	.	.	.	SHV-like	.	.	.	blaKPC-2	.	.	.	.	.	.	.	.	.	.	.	.	.	.	.	blaSHV-12	IncX3/100/100/374	.	.	.	.
CP080680.1	-5.4417	13.3373	1	3	n/a	258	.	.	.	.	.	.	.	.	.	.	KPC-like	.	.	.	.	.	.	SHV-like	.	.	.	blaKPC-2	.	.	.	.	.	.	.	.	.	.	.	.	.	.	.	blaSHV-12	IncX3/100/100/374	.	.	.	.
CP080676.1	-4.96406	13.9041	1	3	n/a	258	.	.	.	.	.	.	.	.	.	.	KPC-like	.	.	.	.	.	.	SHV-like	.	.	.	blaKPC-2	.	.	.	.	.	.	.	.	.	.	.	.	.	.	.	blaSHV-12	IncX3/100/100/374	.	.	.	.
CP080672.1	-4.96406	13.9041	1	3	n/a	258	.	.	.	.	.	.	.	.	.	.	KPC-like	.	.	.	.	.	.	SHV-like	.	.	.	blaKPC-2	.	.	.	.	.	.	.	.	.	.	.	.	.	.	.	blaSHV-12	IncX3/100/100/374	.	.	.	.
CP080668.1	-5.50453	13.3633	1	3	n/a	258	.	.	.	.	.	.	.	.	.	.	KPC-like	.	.	.	.	.	.	SHV-like	.	.	.	blaKPC-2	.	.	.	.	.	.	.	.	.	.	.	.	.	.	.	blaSHV-12	IncX3/100/100/374	.	.	.	.
CP080663.1	-4.96373	13.9046	1	3	n/a	258	.	.	.	.	.	.	.	.	.	.	KPC-like	.	.	.	.	.	.	SHV-like	.	.	.	blaKPC-2	.	.	.	.	.	.	.	.	.	.	.	.	.	.	.	blaSHV-12	IncX3/100/100/374	.	.	.	.
CP080659.1	-5.07893	13.8689	0.868912	3	n/a	258	.	.	.	.	.	.	.	.	.	.	KPC-like	.	.	.	.	.	.	SHV-like	.	.	.	blaKPC-2	.	.	.	.	.	.	.	.	.	.	.	.	.	.	.	blaSHV-12	IncX3/100/100/374	.	.	.	.
CP080655.1	-5.90013	13.6672	1	3	n/a	258	.	.	.	.	.	.	.	.	.	.	.	.	.	.	.	.	.	SHV-like	.	.	.	.	.	.	.	.	.	.	.	.	.	.	.	.	.	.	.	blaSHV-12	IncX3/100/100/374	.	.	.	.
CP080367.1	-7.83872	13.7436	0.861119	3	n/a	16	.	.	.	.	.	.	.	.	.	.	.	.	.	.	.	OXA-48-like	.	.	.	.	.	.	.	.	.	.	.	.	.	.	.	.	.	.	.	.	.	.	IncX3/100/100/374	ColKP3/81.79/100/280	.	.	.
CP080361.1	-7.97878	14.0606	1	3	n/a	16	.	.	.	.	.	.	.	.	.	.	.	.	.	.	.	.	.	.	.	.	.	.	.	.	.	.	.	.	.	.	.	.	.	.	.	.	.	.	IncX3/100/100/374	.	.	.	.
CP074526.1	-5.28982	13.8908	0.911162	3	n/a	258	.	.	.	.	.	.	.	.	.	.	.	.	.	.	.	.	.	SHV-like	.	.	.	.	.	.	.	.	.	.	.	.	.	.	.	.	.	.	.	blaSHV-12	IncX3/100/100/374	.	.	.	.
CP074443.1	-5.43861	12.7873	0.947043	3	n/a	258	.	.	.	.	.	.	.	.	.	.	.	.	.	.	.	.	.	SHV-like	.	.	.	.	.	.	.	.	.	.	.	.	.	.	.	.	.	.	.	blaSHV-12	IncX3/100/100/374	.	.	.	.
CP071169.1	-7.42381	14.6217	1	3	n/a	789	.	.	.	.	.	.	.	.	.	.	.	NDM-like	.	.	.	.	.	.	.	.	.	.	.	.	.	.	.	.	.	.	.	.	.	.	.	.	.	.	IncX3/100/100/374	.	.	.	.
CP070561.1	-6.44484	13.3292	1	3	n/a	512	.	.	.	.	.	.	.	.	.	.	.	.	.	.	.	.	.	SHV-like	.	.	.	.	.	.	.	.	.	.	.	.	.	.	.	.	.	.	blaSHV-11	.	IncX3/100/100/374	.	.	.	.
CP070086.1	-6.23436	13.1256	1	3	n/a	258	.	.	.	.	.	.	.	.	.	.	.	.	.	.	.	.	.	SHV-like	.	.	.	.	.	.	.	.	.	.	.	.	.	.	.	.	.	.	blaSHV-11	.	IncX3/100/100/374	.	.	.	.
CP068612.1	-6.44729	13.4408	1	3	n/a	258	.	.	.	.	.	.	.	.	.	.	.	.	.	.	.	.	.	SHV-like	.	.	.	.	.	.	.	.	.	.	.	.	.	.	.	.	.	.	.	blaSHV-12	IncX3/100/100/374	.	.	.	.
CP068606.1	-5.96312	13.6905	1	3	n/a	258	.	.	.	.	.	.	.	.	.	.	.	.	.	.	.	.	.	SHV-like	.	.	.	.	.	.	.	.	.	.	.	.	.	.	.	.	.	.	.	blaSHV-12	IncX3/100/100/374	.	.	.	.
CP067942.1	-5.63375	13.1946	1	3	n/a	258	.	.	.	.	.	.	.	.	.	.	.	.	.	.	.	.	.	SHV-like	.	.	.	.	.	.	.	.	.	.	.	.	.	.	.	.	.	.	.	blaSHV-12	IncX3/100/100/374	.	.	.	.
CP067928.1	-5.50764	13.3481	1	3	n/a	258	.	.	.	.	.	.	.	.	.	.	KPC-like	.	.	.	.	.	.	SHV-like	.	.	.	blaKPC-2	.	.	.	.	.	.	.	.	.	.	.	.	.	.	.	blaSHV-12	IncX3/100/100/374	.	.	.	.
CP067919.1	-5.89687	13.7151	1	3	n/a	258	.	.	.	.	.	.	.	.	.	.	.	.	.	.	.	.	.	SHV-like	.	.	.	.	.	.	.	.	.	.	.	.	.	.	.	.	.	.	.	blaSHV-12	IncX3/100/100/374	.	.	.	.
CP067894.1	-5.95748	12.8894	1	3	n/a	258	.	.	.	.	.	.	.	.	.	.	.	.	.	.	.	.	.	SHV-like	.	.	.	.	.	.	.	.	.	.	.	.	.	.	.	.	.	.	.	blaSHV-12	IncX3/100/100/374	.	.	.	.
CP067875.1	-5.89687	13.7151	1	3	n/a	258	.	.	.	.	.	.	.	.	.	.	.	.	.	.	.	.	.	SHV-like	.	.	.	.	.	.	.	.	.	.	.	.	.	.	.	.	.	.	.	blaSHV-12	IncX3/100/100/374	.	.	.	.
CP067869.1	-5.89837	13.7074	1	3	n/a	258	.	.	.	.	.	.	.	.	.	.	.	.	.	.	.	.	.	SHV-like	.	.	.	.	.	.	.	.	.	.	.	.	.	.	.	.	.	.	.	blaSHV-12	IncX3/100/100/374	.	.	.	.
CP067834.1	-5.89102	13.7057	1	3	n/a	258	.	.	.	.	.	.	.	.	.	.	.	.	.	.	.	.	.	SHV-like	.	.	.	.	.	.	.	.	.	.	.	.	.	.	.	.	.	.	.	blaSHV-12	IncX3/100/100/374	.	.	.	.
CP067820.1	-5.89189	13.7064	1	3	n/a	258	.	.	.	.	.	.	.	.	.	.	.	.	.	.	.	.	.	SHV-like	.	.	.	.	.	.	.	.	.	.	.	.	.	.	.	.	.	.	.	blaSHV-12	IncX3/100/100/374	.	.	.	.
CP067784.1	-5.89883	13.707	1	3	n/a	258	.	.	.	.	.	.	.	.	.	.	.	.	.	.	.	.	.	SHV-like	.	.	.	.	.	.	.	.	.	.	.	.	.	.	.	.	.	.	.	blaSHV-12	IncX3/100/100/374	.	.	.	.
CP067772.1	-6.15332	13.0788	1	3	n/a	258	.	.	.	.	.	.	.	.	.	.	.	.	.	.	.	.	.	SHV-like	.	.	.	.	.	.	.	.	.	.	.	.	.	.	.	.	.	.	.	blaSHV-12	IncX3/100/100/374	.	.	.	.
CP067765.1	-5.89994	13.7143	1	3	n/a	258	.	.	.	.	.	.	.	.	.	.	.	.	.	.	.	.	.	SHV-like	.	.	.	.	.	.	.	.	.	.	.	.	.	.	.	.	.	.	.	blaSHV-12	IncX3/100/100/374	.	.	.	.
CP067756.1	-5.89687	13.7151	1	3	n/a	258	.	.	.	.	.	.	.	.	.	.	.	.	.	.	.	.	.	SHV-like	.	.	.	.	.	.	.	.	.	.	.	.	.	.	.	.	.	.	.	blaSHV-12	IncX3/100/100/374	.	.	.	.
CP067740.1	-5.89687	13.7151	1	3	n/a	258	.	.	.	.	.	.	.	.	.	.	.	.	.	.	.	.	.	SHV-like	.	.	.	.	.	.	.	.	.	.	.	.	.	.	.	.	.	.	.	blaSHV-12	IncX3/100/100/374	.	.	.	.
CP067731.1	-5.90009	13.7062	1	3	n/a	258	.	.	.	.	.	.	.	.	.	.	.	.	.	.	.	.	.	SHV-like	.	.	.	.	.	.	.	.	.	.	.	.	.	.	.	.	.	.	.	blaSHV-12	IncX3/100/100/374	.	.	.	.
CP067727.1	-5.89883	13.707	1	3	n/a	258	.	.	.	.	.	.	.	.	.	.	.	.	.	.	.	.	.	SHV-like	.	.	.	.	.	.	.	.	.	.	.	.	.	.	.	.	.	.	.	blaSHV-12	IncX3/100/100/374	.	.	.	.
CP067701.1	-5.8979	13.7077	1	3	n/a	258	.	.	.	.	.	.	.	.	.	.	.	.	.	.	.	.	.	SHV-like	.	.	.	.	.	.	.	.	.	.	.	.	.	.	.	.	.	.	.	blaSHV-12	IncX3/100/100/374	.	.	.	.
CP067682.1	-5.89687	13.7151	1	3	n/a	258	.	.	.	.	.	.	.	.	.	.	.	.	.	.	.	.	.	SHV-like	.	.	.	.	.	.	.	.	.	.	.	.	.	.	.	.	.	.	.	blaSHV-12	IncX3/100/100/374	.	.	.	.
CP067646.1	-5.89837	13.7074	1	3	n/a	258	.	.	.	.	.	.	.	.	.	.	.	.	.	.	.	.	.	SHV-like	.	.	.	.	.	.	.	.	.	.	.	.	.	.	.	.	.	.	.	blaSHV-12	IncX3/100/100/374	.	.	.	.
CP067641.1	-5.89687	13.7151	1	3	n/a	258	.	.	.	.	.	.	.	.	.	.	.	.	.	.	.	.	.	SHV-like	.	.	.	.	.	.	.	.	.	.	.	.	.	.	.	.	.	.	.	blaSHV-12	IncX3/100/100/374	.	.	.	.
CP067635.1	-5.89454	13.7132	1	3	n/a	258	.	.	.	.	.	.	.	.	.	.	.	.	.	.	.	.	.	SHV-like	.	.	.	.	.	.	.	.	.	.	.	.	.	.	.	.	.	.	.	blaSHV-12	IncX3/100/100/374	.	.	.	.
CP067625.1	-5.89837	13.7074	1	3	n/a	258	.	.	.	.	.	.	.	.	.	.	.	.	.	.	.	.	.	SHV-like	.	.	.	.	.	.	.	.	.	.	.	.	.	.	.	.	.	.	.	blaSHV-12	IncX3/100/100/374	.	.	.	.
CP067619.1	-5.89924	13.7145	1	3	n/a	258	.	.	.	.	.	.	.	.	.	.	.	.	.	.	.	.	.	SHV-like	.	.	.	.	.	.	.	.	.	.	.	.	.	.	.	.	.	.	.	blaSHV-12	IncX3/62.3/100/374	.	.	.	.
CP067602.1	-5.55732	13.1105	1	3	n/a	258	.	.	.	.	.	.	.	.	.	.	.	.	.	.	.	.	.	SHV-like	.	.	.	.	.	.	.	.	.	.	.	.	.	.	.	.	.	.	.	blaSHV-12	IncX3/100/100/374	.	.	.	.
CP067597.1	-5.89687	13.7151	1	3	n/a	258	.	.	.	.	.	.	.	.	.	.	.	.	.	.	.	.	.	SHV-like	.	.	.	.	.	.	.	.	.	.	.	.	.	.	.	.	.	.	.	blaSHV-12	IncX3/100/100/374	.	.	.	.
CP067570.1	-5.89837	13.7074	1	3	n/a	258	.	.	.	.	.	.	.	.	.	.	.	.	.	.	.	.	.	SHV-like	.	.	.	.	.	.	.	.	.	.	.	.	.	.	.	.	.	.	.	blaSHV-12	IncX3/100/100/374	.	.	.	.
CP067547.1	-5.89687	13.7151	1	3	n/a	258	.	.	.	.	.	.	.	.	.	.	.	.	.	.	.	.	.	SHV-like	.	.	.	.	.	.	.	.	.	.	.	.	.	.	.	.	.	.	.	blaSHV-12	IncX3/100/100/374	.	.	.	.
CP067540.1	-5.89687	13.7151	1	3	n/a	258	.	.	.	.	.	.	.	.	.	.	.	.	.	.	.	.	.	SHV-like	.	.	.	.	.	.	.	.	.	.	.	.	.	.	.	.	.	.	.	blaSHV-12	IncX3/100/100/374	.	.	.	.
CP067528.1	-5.89102	13.7057	1	3	n/a	258	.	.	.	.	.	.	.	.	.	.	.	.	.	.	.	.	.	SHV-like	.	.	.	.	.	.	.	.	.	.	.	.	.	.	.	.	.	.	.	blaSHV-12	IncX3/100/100/374	.	.	.	.
CP067523.1	-5.89874	13.7071	1	3	n/a	258	.	.	.	.	.	.	.	.	.	.	.	.	.	.	.	.	.	SHV-like	.	.	.	.	.	.	.	.	.	.	.	.	.	.	.	.	.	.	.	blaSHV-12	IncX3/100/100/374	.	.	.	.
CP067498.1	-5.6823	13.1211	1	3	n/a	258	.	.	.	.	.	.	.	.	.	.	.	.	.	.	.	.	.	SHV-like	.	.	.	.	.	.	.	.	.	.	.	.	.	.	.	.	.	.	.	blaSHV-12	IncX3/100/100/374	.	.	.	.
CP067493.1	-5.6282	13.1892	1	3	n/a	258	.	.	.	.	.	.	.	.	.	.	.	.	.	.	.	.	.	SHV-like	.	.	.	.	.	.	.	.	.	.	.	.	.	.	.	.	.	.	.	blaSHV-12	IncX3/100/100/374	.	.	.	.
CP067487.1	-5.2977	13.8921	0.910509	3	n/a	258	.	.	.	.	.	.	.	.	.	.	.	.	.	.	.	.	.	SHV-like	.	.	.	.	.	.	.	.	.	.	.	.	.	.	.	.	.	.	.	blaSHV-12	IncX3/100/100/374	.	.	.	.
CP067471.1	-5.89852	13.7073	1	3	n/a	258	.	.	.	.	.	.	.	.	.	.	.	.	.	.	.	.	.	SHV-like	.	.	.	.	.	.	.	.	.	.	.	.	.	.	.	.	.	.	.	blaSHV-12	IncX3/100/100/374	.	.	.	.
CP067462.1	-5.89283	13.7068	1	3	n/a	258	.	.	.	.	.	.	.	.	.	.	.	.	.	.	.	.	.	SHV-like	.	.	.	.	.	.	.	.	.	.	.	.	.	.	.	.	.	.	.	blaSHV-12	IncX3/100/100/374	.	.	.	.
CP067446.1	-5.93851	13.6905	1	3	n/a	258	.	.	.	.	.	.	.	.	.	.	.	.	.	.	.	.	.	SHV-like	.	.	.	.	.	.	.	.	.	.	.	.	.	.	.	.	.	.	.	blaSHV-12	IncX3/100/100/374	.	.	.	.
CP065350.1	-7.13139	15.1954	1	3	n/a	11	.	.	.	.	.	.	.	.	.	.	.	NDM-like	.	.	.	.	.	.	.	.	.	.	.	.	.	.	.	.	.	.	.	.	.	.	.	.	.	.	IncX3/100/100/374	.	.	.	.
CP065346.1	-7.12346	15.1946	1	3	n/a	11	.	.	.	.	.	.	.	.	.	.	.	NDM-like	.	.	.	.	.	.	.	.	.	.	.	.	.	.	.	.	.	.	.	.	.	.	.	.	.	.	IncX3/100/100/374	.	.	.	.
CP064823.1	-7.57071	16.4987	0.531567	3	n/a	-	.	.	.	.	.	.	.	.	.	.	.	NDM-like	.	.	.	.	.	.	.	.	.	.	.	.	.	.	.	.	.	.	.	.	.	.	.	.	.	.	IncX3/98.13/98.13/374	.	.	.	.
CP064177.1	-7.29078	14.6835	1	3	n/a	340	.	.	.	.	.	.	.	.	.	.	.	NDM-like	.	.	.	.	.	.	.	.	.	.	.	.	.	.	.	.	.	.	.	.	.	.	.	.	.	.	IncX3/100/100/374	.	.	.	.
CP058945.1	-7.82698	13.7996	0.84275	3	n/a	16	.	.	.	.	.	.	.	.	.	.	.	.	.	.	.	OXA-48-like	.	.	.	.	.	.	.	.	.	.	.	.	.	.	.	.	.	.	.	.	.	.	IncX3/100/100/374	ColKP3/81.79/100/280	.	.	.
CP058328.1	-6.44191	13.3247	1	3	n/a	512	.	.	.	.	.	.	.	.	.	.	.	.	.	.	.	.	.	SHV-like	.	.	.	.	.	.	.	.	.	.	.	.	.	.	.	.	.	.	blaSHV-11	.	IncX3/100/100/374	.	.	.	.
CP056027.1	-11.9648	12.4564	1	3	n/a	258	.	.	.	.	.	.	.	.	.	.	.	.	.	.	.	.	.	.	.	.	.	.	.	.	.	.	.	.	.	.	.	.	.	.	.	.	.	.	repA/100/94.93/612	.	.	.	.
CP055036.1	-8.17325	7.71884	1	3	n/a	17	.	.	.	.	.	.	.	.	.	.	.	.	.	.	.	.	.	.	.	.	.	.	.	.	.	.	.	.	.	.	.	.	.	.	.	.	.	.	Col(MG828)/98.47/94.19/262	.	.	.	.
CP054267.1	-5.34598	11.7726	0.498128	3	n/a	258	.	.	.	.	.	.	.	.	.	.	.	.	.	.	.	.	.	.	.	.	.	.	.	.	.	.	.	.	.	.	.	.	.	.	.	.	.	.	IncX3/100/100/374	ColRNAI/100/100/130	.	.	.
CP052507.1	-6.03835	12.8487	1	3	n/a	307	.	.	.	.	.	.	.	.	.	.	KPC-like	.	.	.	.	.	.	SHV-like	.	.	.	blaKPC-2	.	.	.	.	.	.	.	.	.	.	.	.	.	.	blaSHV-11	.	IncX3/100/100/374	.	.	.	.
CP052170.1	-6.14008	12.8247	1	3	n/a	11	.	.	.	.	.	.	.	.	.	.	KPC-like	.	.	.	.	.	.	SHV-like	.	.	.	blaKPC-2	.	.	.	.	.	.	.	.	.	.	.	.	.	.	blaSHV-11	.	IncX3/100/100/374	.	.	.	.
CP050375.1	-7.82537	13.7432	0.864663	3	n/a	11	.	.	.	.	.	.	.	.	.	.	.	.	.	.	.	OXA-48-like	.	.	.	.	.	.	.	.	.	.	.	.	.	.	.	.	.	.	.	.	.	.	IncX3/100/100/374	ColKP3/81.79/100/280	.	.	.
CP048392.1	-7.31156	14.5177	1	3	n/a	15	.	.	.	.	.	.	.	.	.	.	.	NDM-like	.	.	.	.	.	.	.	.	.	.	.	.	.	.	.	.	.	.	.	.	.	.	.	.	.	.	IncX3/100/100/374	.	.	.	.
CP046892.1	-6.31551	14.8162	0.99191	3	n/a	23	.	.	.	.	.	.	.	.	.	.	.	NDM-like	.	.	.	.	.	SHV-like	.	.	.	.	.	.	.	.	blaNDM-1	.	.	.	.	.	.	.	.	.	.	blaSHV-12	IncX3/100/100/374	.	.	.	.
CP045195.1	-7.86682	13.6988	0.858866	3	n/a	17	.	.	.	.	.	.	.	.	.	.	.	.	.	.	.	OXA-48-like	.	.	.	.	.	.	.	.	.	.	.	.	.	.	.	.	.	.	.	.	.	.	IncX3/100/100/374	ColKP3/81.79/100/280	.	.	.
CP043604.1	-7.17053	15.0445	1	3	n/a	11	.	.	.	.	.	.	.	.	.	.	.	NDM-like	.	.	.	.	.	.	.	.	.	.	.	.	.	.	.	.	.	.	.	.	.	.	.	.	.	.	IncX3/100/100/374	.	.	.	.
CP043591.1	-7.07963	15.1515	1	3	n/a	307	.	.	.	.	.	.	.	.	.	.	.	NDM-like	.	.	.	.	.	.	.	.	.	.	.	.	.	.	.	.	.	.	.	.	.	.	.	.	.	.	IncX3/100/100/374	.	.	.	.
CP043586.1	-7.14025	15.1973	1	3	n/a	35	.	.	.	.	.	.	.	.	.	.	.	NDM-like	.	.	.	.	.	.	.	.	.	.	.	.	.	.	.	.	.	.	.	.	.	.	.	.	.	.	IncX3/100/100/374	.	.	.	.
CP043582.1	-6.302	14.7312	0.986234	3	n/a	23	.	.	.	.	.	.	.	.	.	.	.	NDM-like	.	.	.	.	.	SHV-like	.	.	.	.	.	.	.	.	blaNDM-1	.	.	.	.	.	.	.	.	.	.	blaSHV-12	IncX3/100/100/374	.	.	.	.
CP043050.1	-5.89002	13.72	1	3	n/a	258	.	.	.	.	.	.	.	.	.	.	.	.	.	.	.	.	.	SHV-like	.	.	.	.	.	.	.	.	.	.	.	.	.	.	.	.	.	.	.	blaSHV-12	IncX3/100/100/374	.	.	.	.
CP041947.1	-8.78159	14.5018	0.696893	3	n/a	16	.	.	.	.	.	CTX-M-1-like	.	.	.	.	.	.	.	.	.	.	.	.	blaCTX-M-15	.	.	.	.	.	.	.	.	.	.	.	.	.	.	.	.	.	.	.	IncX3/100/100/374	.	.	.	.
CP041938.1	-5.66167	14.8531	0.825284	3	n/a	719	.	.	.	.	.	.	.	.	.	.	.	NDM-like	.	.	.	.	.	SHV-like	.	.	.	.	.	.	.	.	blaNDM-1	.	.	.	.	.	.	.	.	.	.	blaSHV-12	IncX3/100/100/374	.	.	.	.
CP041931.1	-7.84609	13.7505	0.854336	3	n/a	16	.	.	.	.	.	.	.	.	.	.	.	.	.	.	.	OXA-48-like	.	.	.	.	.	.	.	.	.	.	.	.	.	.	.	.	.	.	.	.	.	.	ColKP3/81.79/100/280	IncX3/100/100/374	.	.	.
CP040446.1	-7.29252	14.6901	1	3	n/a	16	.	.	.	.	.	.	.	.	.	.	.	NDM-like	.	.	.	.	.	.	.	.	.	.	.	.	.	.	.	.	.	.	.	.	.	.	.	.	.	.	IncX3/100/100/374	.	.	.	.
CP039811.1	-6.37461	14.6179	1	3	n/a	11	.	.	.	.	.	.	.	.	.	.	.	NDM-like	.	.	.	.	.	SHV-like	.	.	.	.	.	.	.	.	blaNDM-1	.	.	.	.	.	.	.	.	.	.	blaSHV-12	IncX3/100/100/374	.	.	.	.
CP037965.1	-6.29303	14.8038	0.971462	3	n/a	1	.	.	.	.	.	.	.	.	.	.	.	NDM-like	.	.	.	.	.	SHV-like	.	.	.	.	.	.	.	.	blaNDM-1	.	.	.	.	.	.	.	.	.	.	blaSHV-12	IncX3/100/100/374	.	.	.	.
CP036195.1	-8.1724	13.0383	0.615892	3	n/a	23	.	.	.	.	.	.	.	.	.	.	.	.	.	.	.	.	.	.	.	.	.	.	.	.	.	.	.	.	.	.	.	.	.	.	.	.	.	.	IncX3/100/100/374	.	.	.	.
CP035910.1	-7.81355	13.242	0.719004	3	n/a	23	.	.	.	.	.	.	.	.	.	.	.	.	.	.	.	.	.	.	.	.	.	.	.	.	.	.	.	.	.	.	.	.	.	.	.	.	.	.	IncX3/100/99.73/374	.	.	.	.
CP034323.1	-6.38717	14.5972	1	3	n/a	11	.	.	.	.	.	.	.	.	.	.	.	NDM-like	.	.	.	.	.	SHV-like	.	.	.	.	.	.	.	.	blaNDM-1	.	.	.	.	.	.	.	.	.	.	blaSHV-12	IncX3/100/100/374	.	.	.	.
CP034284.1	-7.84024	13.7415	0.862227	3	n/a	307	.	.	.	.	.	.	.	.	.	.	.	.	.	.	.	OXA-48-like	.	.	.	.	.	.	.	.	.	.	.	.	.	.	.	.	.	.	.	.	.	.	IncX3/62.3/100/374	ColKP3/81.79/100/280	.	.	.
CP032190.1	-8.97117	12.739	0.625761	3	n/a	16	.	.	.	.	.	.	.	.	.	.	.	.	.	.	.	.	.	.	.	.	.	.	.	.	.	.	.	.	.	.	.	.	.	.	.	.	.	.	IncX3/100/100/374	.	.	.	.
CP031884.1	-6.37834	16.7191	0.490753	3	n/a	1	.	.	.	.	.	.	.	.	.	.	.	NDM-like	.	.	.	.	.	.	.	.	.	.	.	.	.	.	blaNDM-1	.	.	.	.	.	.	.	.	.	.	.	IncFII(K)/100/100/148	IncX3/100/100/374	.	.	.
CP031373.2	-7.55816	12.6728	0.765353	3	n/a	101	.	.	.	.	.	.	.	.	.	.	.	.	.	.	.	.	.	SHV-like	.	.	.	.	.	.	.	.	.	.	.	.	.	.	.	.	.	.	.	.	IncX3/100/100/374	.	.	.	.
CP030344.1	-9.46473	13.109	0.496099	3	n/a	258	.	.	.	.	.	.	.	.	.	.	.	.	.	.	.	.	.	.	.	.	.	.	.	.	.	.	.	.	.	.	.	.	.	.	.	.	.	.	.	.	.	.	.
CP030299.1	-6.30679	14.7796	0.987477	3	n/a	1	.	.	.	.	.	.	.	.	.	.	.	NDM-like	.	.	.	.	.	SHV-like	.	.	.	.	.	.	.	.	blaNDM-1	.	.	.	.	.	.	.	.	.	.	blaSHV-12	IncX3/100/100/374	.	.	.	.
CP029386.1	-6.43366	14.5622	1	3	n/a	48	.	.	.	.	.	.	.	.	.	.	.	NDM-like	.	.	.	.	.	SHV-like	.	.	.	.	.	.	.	.	.	.	.	.	.	.	.	.	.	.	.	.	IncX3/100/100/374	.	.	.	.
CP029100.1	-4.9566	12.8724	0.787672	3	n/a	512	.	.	.	.	.	.	.	.	.	.	.	.	.	.	.	.	.	SHV-like	.	.	.	.	.	.	.	.	.	.	.	.	.	.	.	.	.	.	blaSHV-11	.	IncX3/100/100/374	.	.	.	.
CP029098.1	-9.73016	14.1133	0.450596	3	n/a	512	.	.	.	.	.	.	.	.	.	.	.	.	.	.	.	.	.	.	.	.	.	.	.	.	.	.	.	.	.	.	.	.	.	.	.	.	.	.	.	.	.	.	.
CP028786.2	-6.29074	14.8076	0.968833	3	n/a	1	.	.	.	.	.	.	.	.	.	.	.	NDM-like	.	.	.	.	.	SHV-like	.	.	.	.	.	.	.	.	blaNDM-1	.	.	.	.	.	.	.	.	.	.	blaSHV-12	IncX3/100/100/374	.	.	.	.
CP028718.1	-7.55296	14.9353	1	3	n/a	15	.	.	.	.	.	.	.	.	.	.	.	NDM-like	.	.	.	.	.	.	.	.	.	.	.	.	.	.	.	.	.	.	.	.	.	.	.	.	.	.	IncX3/100/100/374	.	.	.	.
CP028182.1	-6.37862	13.1561	1	3	n/a	512	.	.	.	.	.	.	.	.	.	.	.	.	.	.	.	.	.	SHV-like	.	.	.	.	.	.	.	.	.	.	.	.	.	.	.	.	.	.	blaSHV-11	.	IncX3/100/100/374	.	.	.	.
CP027700.1	-7.93001	10.6478	0.340429	3	n/a	258	.	.	.	.	.	.	.	.	.	.	KPC-like	.	.	.	.	.	.	.	.	.	.	blaKPC-2	.	.	.	.	.	.	.	.	.	.	.	.	.	.	.	.	IncU/100/99.47/565	IncX3/100/99.73/374	.	.	.
CP027159.1	-9.58179	13.1037	0.473964	3	n/a	258	.	.	.	.	.	.	.	.	.	.	.	.	.	.	.	.	.	.	.	.	.	.	.	.	.	.	.	.	.	.	.	.	.	.	.	.	.	.	IncX3/100/100/374	.	.	.	.
CP027157.1	-9.44327	14.1115	0.495741	3	n/a	258	.	.	.	.	.	.	.	.	.	.	.	.	.	.	.	.	.	.	.	.	.	.	.	.	.	.	.	.	.	.	.	.	.	.	.	.	.	.	.	.	.	.	.
CP027057.1	-5.90467	13.2865	1	3	n/a	258	.	.	.	.	.	.	.	.	.	.	.	.	.	.	.	.	.	SHV-like	.	.	.	.	.	.	.	.	.	.	.	.	.	.	.	.	.	.	.	blaSHV-12	IncX3/100/100/374	.	.	.	.
CP027051.1	-5.97193	13.1876	1	3	n/a	258	.	.	.	.	.	.	.	.	.	.	.	.	.	.	.	.	.	SHV-like	.	.	.	.	.	.	.	.	.	.	.	.	.	.	.	.	.	.	.	blaSHV-12	IncX3/100/100/374	.	.	.	.
CP025215.1	-7.30288	14.5622	1	3	n/a	34	.	.	.	.	.	.	.	.	.	.	.	NDM-like	.	.	.	.	.	.	.	.	.	.	.	.	.	.	.	.	.	.	.	.	.	.	.	.	.	.	IncX3/98.93/94.32/374	IncX3/100/100/374	.	.	.
CP025041.1	-4.96311	13.6235	0.956577	3	n/a	258	.	.	.	.	.	.	.	.	.	.	.	.	.	.	.	.	.	SHV-like	.	.	.	.	.	.	.	.	.	.	.	.	.	.	.	.	.	.	.	.	IncX3/100/100/374	IncX3/98.13/98.13/374	.	.	.
CP025007.1	-5.87565	12.5498	0.924456	3	n/a	258	.	.	.	.	.	.	.	.	.	.	.	.	.	.	.	.	.	SHV-like	.	.	.	.	.	.	.	.	.	.	.	.	.	.	.	.	.	.	.	blaSHV-12	IncX3/75.67/100/374	.	.	.	.
CP022694.2	-5.90487	13.6724	1	3	n/a	258	.	.	.	.	.	.	.	.	.	.	.	.	.	.	.	.	.	SHV-like	.	.	.	.	.	.	.	.	.	.	.	.	.	.	.	.	.	.	.	blaSHV-12	IncX3/100/100/374	.	.	.	.
CP022575.1	-5.89098	13.6663	1	3	n/a	258	.	.	.	.	.	.	.	.	.	.	.	.	.	.	.	.	.	SHV-like	.	.	.	.	.	.	.	.	.	.	.	.	.	.	.	.	.	.	.	blaSHV-12	IncX3/100/100/374	.	.	.	.
CP021836.1	-6.16635	13.5663	1	3	n/a	258	.	.	.	.	.	.	.	.	.	.	.	.	.	.	.	.	.	SHV-like	.	.	.	.	.	.	.	.	.	.	.	.	.	.	.	.	.	.	blaSHV-11	.	IncX3/86.36/100/374	.	.	.	.
CP021759.1	-7.52851	14.9223	1	3	n/a	147	.	.	.	.	.	.	.	.	.	.	.	NDM-like	.	.	.	.	.	.	.	.	.	.	.	.	.	.	.	.	.	.	.	.	.	.	.	.	.	.	IncX3/100/100/374	.	.	.	.
CP021715.1	-5.90216	13.6738	1	3	n/a	258	.	.	.	.	.	.	.	.	.	.	.	.	.	.	.	.	.	SHV-like	.	.	.	.	.	.	.	.	.	.	.	.	.	.	.	.	.	.	.	blaSHV-12	IncX3/100/100/374	.	.	.	.
CP021542.1	-5.90227	13.7133	1	3	n/a	258	.	.	.	.	.	.	.	.	.	.	.	.	.	.	.	.	.	SHV-like	.	.	.	.	.	.	.	.	.	.	.	.	.	.	.	.	.	.	.	blaSHV-12	IncX3/100/100/374	.	.	.	.
CP020839.1	-5.92223	13.7282	1	3	n/a	258	.	.	.	.	.	.	.	.	.	.	.	.	.	.	.	.	.	SHV-like	.	.	.	.	.	.	.	.	.	.	.	.	.	.	.	.	.	.	.	blaSHV-12	IncX3/100/100/374	.	.	.	.
CP020111.1	-5.93068	13.6729	1	3	n/a	258	.	.	.	.	.	.	.	.	.	.	.	.	.	.	.	.	.	SHV-like	.	.	.	.	.	.	.	.	.	.	.	.	.	.	.	.	.	.	.	blaSHV-12	IncX3/100/100/374	.	.	.	.
CP020074.1	-5.98106	13.6972	1	3	n/a	258	.	.	.	.	.	.	.	.	.	.	.	.	.	.	.	.	.	SHV-like	.	.	.	.	.	.	.	.	.	.	.	.	.	.	.	.	.	.	.	blaSHV-12	IncX3/100/100/374	.	.	.	.
CP018435.1	-5.43315	12.8027	0.955672	3	n/a	258	.	.	.	.	.	.	.	.	.	.	.	.	.	.	.	.	.	SHV-like	.	.	.	.	.	.	.	.	.	.	.	.	.	.	.	.	.	.	.	blaSHV-12	IncX3/100/100/374	.	.	.	.
CP018429.1	-5.35938	12.7361	1	3	n/a	258	.	.	.	.	.	.	.	.	.	.	.	.	.	.	.	.	.	SHV-like	.	.	.	.	.	.	.	.	.	.	.	.	.	.	.	.	.	.	.	blaSHV-12	IncX3/100/100/374	.	.	.	.
CP018423.1	-5.35938	12.7361	1	3	n/a	258	.	.	.	.	.	.	.	.	.	.	.	.	.	.	.	.	.	SHV-like	.	.	.	.	.	.	.	.	.	.	.	.	.	.	.	.	.	.	.	blaSHV-12	IncX3/100/100/374	.	.	.	.
CP015825.1	-6.46287	13.1694	1	3	n/a	512	.	.	.	.	.	.	.	.	.	.	.	.	.	.	.	.	.	SHV-like	.	.	.	.	.	.	.	.	.	.	.	.	.	.	.	.	.	.	blaSHV-11	.	IncX3/100/100/374	.	.	.	.
CP014006.1	-7.12715	15.196	1	3	n/a	14	.	.	.	.	.	.	.	.	.	.	.	NDM-like	.	.	.	.	.	.	.	.	.	.	.	.	.	.	.	.	.	.	.	.	.	.	.	.	.	.	IncX3/100/100/374	.	.	.	.
CP012995.1	-8.40454	14.794	0.819455	3	n/a	278	.	.	.	.	.	.	.	.	.	.	.	.	.	.	.	.	.	.	.	.	.	.	.	.	.	.	.	.	.	.	.	.	.	.	.	.	.	.	IncX3/100/100/374	.	.	.	.
CP012990.1	-7.10803	15.1901	1	3	n/a	278	.	.	.	.	.	.	.	.	.	.	.	NDM-like	.	.	.	.	.	.	.	.	.	.	.	.	.	.	.	.	.	.	.	.	.	.	.	.	.	.	IncX3/100/100/374	.	.	.	.
CP012563.1	-8.97763	12.7356	0.622947	3	n/a	16	.	.	.	.	.	.	.	.	.	.	.	.	.	.	.	.	.	.	.	.	.	.	.	.	.	.	.	.	.	.	.	.	.	.	.	.	.	.	IncX3/100/100/374	.	.	.	.
CP011992.1	-5.8979	13.7077	1	3	n/a	258	.	.	.	.	.	.	.	.	.	.	.	.	.	.	.	.	.	SHV-like	.	.	.	.	.	.	.	.	.	.	.	.	.	.	.	.	.	.	.	blaSHV-12	IncX3/100/100/374	.	.	.	.
CP011987.1	-4.16876	13.7364	0.551473	3	n/a	258	.	.	.	.	.	.	.	.	.	.	.	.	.	.	.	.	.	SHV-like	.	.	.	.	.	.	.	.	.	.	.	.	.	.	.	.	.	.	.	blaSHV-12	IncX3/100/100/374	.	.	.	.
CP011983.1	-5.8979	13.7077	1	3	n/a	258	.	.	.	.	.	.	.	.	.	.	.	.	.	.	.	.	.	SHV-like	.	.	.	.	.	.	.	.	.	.	.	.	.	.	.	.	.	.	.	blaSHV-12	IncX3/100/100/374	.	.	.	.
CP010395.1	-5.95908	13.6772	1	3	n/a	258	.	.	.	.	.	.	.	.	.	.	.	.	.	.	.	.	.	SHV-like	.	.	.	.	.	.	.	.	.	.	.	.	.	.	.	.	.	.	.	blaSHV-12	IncX3/100/100/374	.	.	.	.
CP008799.1	-5.3044	11.982	0.54738	3	n/a	258	.	.	.	.	.	.	.	.	.	.	.	.	.	.	.	.	.	SHV-like	.	.	.	.	.	.	.	.	.	.	.	.	.	.	.	.	.	.	.	blaSHV-12	IncX3/100/100/374	ColRNAI/100/100/130	.	.	.
CP003997.1	-7.97975	10.6772	0.342264	3	n/a	442	.	.	.	.	.	.	.	.	.	.	KPC-like	.	.	.	.	.	.	.	.	.	.	blaKPC-2	.	.	.	.	.	.	.	.	.	.	.	.	.	.	.	.	IncX3/100/99.73/374	IncU/100/99.47/565	.	.	.
908343_p2	8.36334	35.7848	1	4	Georgia	23	iucA	.	.	rmpA2	peg344	.	.	.	.	.	.	.	.	.	.	.	.	.	.	.	.	.	.	.	.	.	.	.	.	.	.	.	.	.	.	.	.	.	IncFIB(K)/100/91.25/560	.	.	.	.
908271_p1	8.40354	35.8294	1	4	Georgia	23	iucA	.	.	rmpA2	peg344	.	.	.	.	.	.	.	.	.	.	.	.	.	.	.	.	.	.	.	.	.	.	.	.	.	.	.	.	.	.	.	.	.	IncFIB(K)/100/91.25/560	.	.	.	.
512745_p1	9.52376	36.9984	1	4	Jordan	592	iucA	iroB	rmpA	rmpA2	peg344	.	.	.	.	.	.	.	.	.	.	.	.	.	.	.	.	.	.	.	.	.	.	.	.	.	.	.	.	.	.	.	.	.	IncHI1B/100/99.3/570	IncFIB(K)/100/91.25/560	.	.	.
505107_p1	9.49113	36.9693	1	4	Jordan	592	iucA	iroB	rmpA	rmpA2	peg344	.	.	.	.	.	.	.	.	.	.	.	.	.	.	.	.	.	.	.	.	.	.	.	.	.	.	.	.	.	.	.	.	.	IncHI1B/100/99.3/570	IncFIB(K)/100/91.25/560	.	.	.
21841_p1	8.9337	35.8281	1	4	Jordan	893	iucA	iroB	rmpA	rmpA2	peg344	.	.	.	.	.	.	.	.	.	.	.	.	.	.	.	.	.	.	.	.	.	.	.	.	.	.	.	.	.	.	.	.	.	IncFIB(K)/100/91.25/560	.	.	.	.
817640_p1	9.4918	36.979	.	4	Thailand	420	.	.	.	.	.	.	.	.	.	.	.	.	.	.	.	.	.	.	.	.	.	.	.	.	.	.	.	.	.	.	.	.	.	.	.	.	.	.	.	.	.	.	.
976583_p1	8.96425	37.8617	.	4	Thailand	65	.	.	.	.	.	.	.	.	.	.	.	.	.	.	.	.	.	.	.	.	.	.	.	.	.	.	.	.	.	.	.	.	.	.	.	.	.	.	.	.	.	.	.
974699_p1	9.87683	37.755	1	4	Thailand	86	iucA	iroB	rmpA	rmpA2	peg344	.	.	.	.	.	.	.	.	.	.	.	.	.	.	.	.	.	.	.	.	.	.	.	.	.	.	.	.	.	.	.	.	.	IncHI1B/100/99.3/570	IncFIB(K)/100/91.25/560	.	.	.
974649_p1	9.53156	37.0108	1	4	Thailand	592	iucA	iroB	rmpA	rmpA2	peg344	.	.	.	.	.	.	.	.	.	.	.	.	.	.	.	.	.	.	.	.	.	.	.	.	.	.	.	.	.	.	.	.	.	IncHI1B/100/99.3/570	IncFIB(K)/100/91.25/560	.	.	.
974367_p1	12.2303	38.2684	1	4	Thailand	23	iucA	iroB	rmpA	rmpA2	peg344	.	.	.	.	.	.	.	.	.	.	.	.	.	.	.	.	.	.	.	.	.	.	.	.	.	.	.	.	.	.	.	.	.	IncHI1B/82.98/99.15/570	IncFIB(K)/100/91.25/560	.	.	.
817762_p1	8.88851	37.532	1	4	Thailand	65	iucA	iroB	rmpA	rmpA2	peg344	.	.	.	.	.	.	.	.	.	.	.	.	.	.	.	.	.	.	.	.	.	.	.	.	.	.	.	.	.	.	.	.	.	IncHI1B/100/99.3/570	IncFIB(K)/100/91.25/560	.	.	.
817632_p1	9.51978	37.0386	1	4	Thailand	420	iucA	iroB	rmpA	rmpA2	peg344	.	.	.	.	.	.	.	.	.	.	.	.	.	.	.	.	.	.	.	.	.	.	.	.	.	.	.	.	.	.	.	.	.	IncHI1B/100/99.3/570	IncFIB(K)/100/91.25/560	.	.	.
817608_p1	8.66549	37.831	1	4	Thailand	65	iucA	.	.	rmpA2	.	.	.	.	.	.	.	.	.	.	.	.	.	.	.	.	.	.	.	.	.	.	.	.	.	.	.	.	.	.	.	.	.	.	IncHI1B/100/99.3/570	IncFIB(K)/100/91.25/560	.	.	.
582610_p1	9.80391	35.3079	1	4	Thailand	268	iucA	iroB	rmpA	rmpA2	peg344	.	.	.	.	.	.	.	.	.	.	.	.	.	.	.	.	.	.	.	.	.	.	.	.	.	.	.	.	.	.	.	.	.	IncFIB(K)/100/91.25/560	.	.	.	.
893342_p1	9.87618	37.7494	1	4	Uganda	86	iucA	iroB	rmpA	rmpA2	peg344	.	.	.	.	.	.	.	.	.	.	.	.	.	.	.	.	.	.	.	.	.	.	.	.	.	.	.	.	.	.	.	.	.	IncHI1B/100/99.3/570	IncFIB(K)/100/91.25/560	.	.	.
550037_p1	9.00633	35.7726	1	4	Uganda	412	iucA	iroB	rmpA	rmpA2	peg344	.	.	.	.	.	.	.	.	.	.	.	.	.	.	.	.	.	.	.	.	.	.	.	.	.	.	.	.	.	.	.	.	.	IncFIB(K)/100/91.25/560	.	.	.	.
740859_p6	8.27968	35.9846	1	4	Ukraine	23	iucA	.	rmpA	rmpA2	peg344	.	.	.	.	.	.	.	.	.	.	.	.	.	.	.	.	.	.	.	.	.	.	.	.	.	.	.	.	.	.	.	.	.	IncFIB(K)/100/91.25/560	.	.	.	.
489766_p1	13.5677	39.2724	1	4	Ukraine	23	iucA	iroB	rmpA	rmpA2	peg344	.	.	.	.	.	.	.	.	.	.	.	.	.	.	.	.	.	.	.	.	.	.	.	.	.	.	.	.	.	.	.	.	.	IncHI1B/82.98/99.15/570	IncFIB(K)/100/91.25/560	.	.	.
7835_p1	13.3329	36.9826	1	4	United States	23	iucA	iroB	rmpA	rmpA2	peg344	.	.	.	.	.	.	.	.	.	.	.	.	.	.	.	.	.	.	.	.	.	.	.	.	.	.	.	.	.	.	.	.	.	IncHI1B/82.98/99.15/570	IncFIB(K)/100/91.25/560	.	.	.
474269_p1	14.3516	35.4949	1	4	United States	23	iucA	iroB	rmpA	rmpA2	peg344	CTX-M-1-like	.	.	.	.	.	.	.	OXA-1-like	.	.	.	.	blaCTX-M-15	.	.	.	.	.	.	.	.	.	.	.	.	.	.	.	.	.	.	.	IncFIB(K)/100/91.25/560	IncHI1B/82.98/99.15/570	.	.	.
25188_p1	13.3442	36.9844	1	4	United States	23	iucA	iroB	rmpA	rmpA2	peg344	.	.	.	.	.	.	.	.	.	.	.	.	.	.	.	.	.	.	.	.	.	.	.	.	.	.	.	.	.	.	.	.	.	IncHI1B/82.98/99.15/570	IncFIB(K)/100/91.25/560	.	.	.
23620_p1	13.6266	37.6207	1	4	United States	23	iucA	iroB	rmpA	rmpA2	peg344	.	.	.	.	.	.	.	.	.	.	.	.	.	.	.	.	.	.	.	.	.	.	.	.	.	.	.	.	.	.	.	.	.	IncHI1B/82.98/99.15/570	IncFIB(K)/100/91.25/560	.	.	.
16006_p1	13.3712	36.4668	1	4	United States	23	iucA	iroB	rmpA	rmpA2	peg344	.	.	.	.	.	.	.	.	.	.	.	.	.	.	.	.	.	.	.	.	.	.	.	.	.	.	.	.	.	.	.	.	.	IncHI1B/82.98/99.15/570	IncFIB(K)/100/98.93/560	.	.	.
LR890473.1	11.5948	40.6956	0.519561	4	n/a	35	.	.	.	.	.	.	.	.	.	.	.	.	.	.	.	.	.	.	.	.	.	.	.	.	.	.	.	.	.	.	.	.	.	.	.	.	.	.	.	.	.	.	.
LR890425.1	10.5581	37.5432	1	4	n/a	86	.	iroB	rmpA	.	peg344	.	.	.	.	.	.	.	.	.	.	.	.	.	.	.	.	.	.	.	.	.	.	.	.	.	.	.	.	.	.	.	.	.	IncHI1B/100/99.3/570	IncFIB(K)/100/91.25/560	.	.	.
CP119179.1	18.0529	40.0383	0.78423	4	n/a	11	.	.	.	.	.	.	.	.	.	.	.	.	.	.	.	.	.	SHV-like	.	.	.	.	.	.	.	.	.	.	.	.	.	.	.	.	.	.	.	blaSHV-12	IncFIB(K)/100/91.25/560	IncHI1B/82.98/99.15/570	.	.	.
LR890465.1	13.8309	38.1997	1	4	n/a	23	iucA	iroB	rmpA	rmpA2	peg344	.	.	.	.	.	.	.	.	.	.	.	.	.	.	.	.	.	.	.	.	.	.	.	.	.	.	.	.	.	.	.	.	.	IncHI1B/82.98/99.15/570	IncFIB(K)/100/91.25/560	.	.	.
LR745046.1	9.87479	37.7439	1	4	n/a	86	iucA	iroB	rmpA	rmpA2	peg344	.	.	.	.	.	.	.	.	.	.	.	.	.	.	.	.	.	.	.	.	.	.	.	.	.	.	.	.	.	.	.	.	.	IncHI1B/100/99.3/570	IncFIB(K)/100/91.25/560	.	.	.
LR745043.1	10.0718	37.3175	1	4	n/a	86	iucA	iroB	rmpA	rmpA2	peg344	.	.	.	.	.	.	.	.	.	.	.	.	.	.	.	.	.	.	.	.	.	.	.	.	.	.	.	.	.	.	.	.	.	IncHI1B/100/99.3/570	IncFIB(K)/100/91.25/560	.	.	.
LR134211.1	9.95865	39.3264	0.962222	4	n/a	375	iucA	iroB	rmpA	rmpA2	peg344	.	.	.	.	.	.	.	.	.	.	.	.	.	.	.	.	.	.	.	.	.	.	.	.	.	.	.	.	.	.	.	.	.	IncFIB(K)/100/91.25/560	IncHI1B/100/99.3/570	.	.	.
CP118907.1	12.6808	37.2603	1	4	n/a	23	iucA	iroB	rmpA	rmpA2	peg344	.	.	.	.	.	.	.	.	.	.	.	.	.	.	.	.	.	.	.	.	.	.	.	.	.	.	.	.	.	.	.	.	.	IncFIB(K)/100/91.25/560	IncHI1B/100/99.3/570	.	.	.
CP116904.1	16.3981	40.0916	1	4	n/a	11	iucA	.	.	rmpA2	.	.	.	.	.	.	.	.	.	.	.	.	.	.	.	.	.	.	.	.	.	.	.	.	.	.	.	.	.	.	.	.	.	.	IncHI1B/82.98/99.15/570	IncFIB(K)/100/91.25/560	.	.	.
CP116492.1	15.2525	38.3689	1	4	n/a	11	iucA	.	rmpA	rmpA2	peg344	.	.	.	.	.	.	.	.	.	.	.	.	.	.	.	.	.	.	.	.	.	.	.	.	.	.	.	.	.	.	.	.	.	IncHI1B/82.98/99.15/570	IncFIB(K)/100/91.25/560	.	.	.
CP109974.1	16.3812	40.3835	1	4	n/a	11	iucA	.	.	rmpA2	.	.	.	.	.	.	.	.	.	.	.	.	.	.	.	.	.	.	.	.	.	.	.	.	.	.	.	.	.	.	.	.	.	.	IncHI1B/82.98/99.15/570	IncFIB(K)/100/91.25/560	.	.	.
CP109949.1	16.3664	40.3261	1	4	n/a	751	iucA	.	.	rmpA2	.	.	.	.	.	.	.	.	.	.	.	.	.	.	.	.	.	.	.	.	.	.	.	.	.	.	.	.	.	.	.	.	.	.	IncHI1B/82.98/99.15/570	IncFIB(K)/100/91.25/560	.	.	.
CP107384.1	16.3055	40.7844	1	4	n/a	11	iucA	.	rmpA	rmpA2	peg344	.	.	.	.	.	.	.	.	.	.	.	.	.	.	.	.	.	.	.	.	.	.	.	.	.	.	.	.	.	.	.	.	.	IncHI1B/82.98/99.15/570	IncFIB(K)/100/91.25/560	.	.	.
CP107373.1	16.3072	40.7914	1	4	n/a	11	iucA	.	rmpA	rmpA2	peg344	.	.	.	.	.	.	.	.	.	.	.	.	.	.	.	.	.	.	.	.	.	.	.	.	.	.	.	.	.	.	.	.	.	IncHI1B/82.98/99.15/570	IncFIB(K)/100/91.25/560	.	.	.
CP107353.1	8.37171	35.2621	0.906929	4	n/a	1049	iucA	iroB	rmpA	rmpA2	peg344	.	.	.	.	.	.	.	.	.	.	.	.	.	.	.	.	.	.	.	.	.	.	.	.	.	.	.	.	.	.	.	.	.	IncFIB(K)/100/91.25/560	.	.	.	.
CP107346.1	16.3778	40.9604	1	4	n/a	11	iucA	.	rmpA	rmpA2	peg344	.	.	.	.	.	.	.	.	.	.	.	.	.	.	.	.	.	.	.	.	.	.	.	.	.	.	.	.	.	.	.	.	.	IncHI1B/82.98/99.15/570	IncFIB(K)/100/91.25/560	.	.	.
CP107335.1	16.3778	40.9599	1	4	n/a	11	iucA	.	rmpA	rmpA2	peg344	.	.	.	.	.	.	.	.	.	.	.	.	.	.	.	.	.	.	.	.	.	.	.	.	.	.	.	.	.	.	.	.	.	IncHI1B/82.98/99.15/570	IncFIB(K)/100/91.25/560	.	.	.
CP098171.1	8.92103	30.7249	0.379704	4	n/a	392	.	.	.	.	.	.	.	.	.	.	.	.	.	.	.	.	.	.	.	.	.	.	.	.	.	.	.	.	.	.	.	.	.	.	.	.	.	.	.	.	.	.	.
CP107328.1	16.3779	40.9585	1	4	n/a	11	iucA	.	rmpA	rmpA2	peg344	.	.	.	.	.	.	.	.	.	.	.	.	.	.	.	.	.	.	.	.	.	.	.	.	.	.	.	.	.	.	.	.	.	IncHI1B/82.98/99.15/570	IncFIB(K)/100/91.25/560	.	.	.
CP097681.1	8.0202	32.5753	0.504579	4	n/a	11	.	.	.	.	.	.	.	.	.	.	.	.	.	.	.	.	.	.	.	.	.	.	.	.	.	.	.	.	.	.	.	.	.	.	.	.	.	.	IncFIB(AP001918)/99.71/96.05/682	IncFIB(AP001918)/100/96.63/682	.	.	.
CP107321.1	16.3779	40.9595	1	4	n/a	11	iucA	.	rmpA	rmpA2	peg344	.	.	.	.	.	.	.	.	.	.	.	.	.	.	.	.	.	.	.	.	.	.	.	.	.	.	.	.	.	.	.	.	.	IncHI1B/82.98/99.15/570	IncFIB(K)/100/91.25/560	.	.	.
CP107314.1	17.3948	40.9232	1	4	n/a	11	iucA	.	rmpA	rmpA2	peg344	.	.	.	.	.	.	.	.	.	.	.	.	.	.	.	.	.	.	.	.	.	.	.	.	.	.	.	.	.	.	.	.	.	IncFIB(K)/100/91.25/560	.	.	.	.
CP107298.1	15.5718	38.3133	1	4	n/a	11	iucA	.	rmpA	rmpA2	peg344	.	.	.	.	.	.	.	.	.	.	.	.	.	.	.	.	.	.	.	.	.	.	.	.	.	.	.	.	.	.	.	.	.	IncFIB(K)/100/91.25/560	IncHI1B/82.98/99.15/570	.	.	.
CP107292.1	15.4895	38.2517	1	4	n/a	11	iucA	.	rmpA	rmpA2	peg344	.	.	.	.	.	.	.	.	.	.	.	.	.	.	.	.	.	.	.	.	.	.	.	.	.	.	.	.	.	.	.	.	.	IncFIB(K)/100/91.25/560	IncHI1B/82.98/99.15/570	.	.	.
CP107015.1	14.6772	38.397	1	4	n/a	11	iucA	iroB	rmpA	rmpA2	peg344	.	.	.	.	.	.	.	.	.	.	.	.	.	.	.	.	.	.	.	.	.	.	.	.	.	.	.	.	.	.	.	.	.	IncHI1B/82.98/99.15/570	IncFIB(K)/100/91.25/560	.	.	.
CP106913.1	15.087	37.7487	1	4	n/a	11	iucA	.	rmpA	rmpA2	peg344	.	.	.	.	.	.	.	.	.	.	.	.	.	.	.	.	.	.	.	.	.	.	.	.	.	.	.	.	.	.	.	.	.	IncHI1B/82.98/99.15/570	IncFIB(K)/100/91.25/560	.	.	.
CP106908.1	15.0966	37.7284	1	4	n/a	11	iucA	.	rmpA	rmpA2	peg344	.	.	.	.	.	.	.	.	.	.	.	.	.	.	.	.	.	.	.	.	.	.	.	.	.	.	.	.	.	.	.	.	.	IncFIB(K)/100/91.25/560	IncHI1B/82.98/99.15/570	.	.	.
CP106761.1	16.2939	40.145	1	4	n/a	11	iucA	.	.	rmpA2	.	.	.	.	.	.	.	.	.	.	.	.	.	.	.	.	.	.	.	.	.	.	.	.	.	.	.	.	.	.	.	.	.	.	IncHI1B/82.98/99.15/570	IncFIB(K)/100/91.25/560	.	.	.
CP104316.1	16.4734	40.3497	1	4	n/a	751	iucA	.	.	rmpA2	.	.	.	.	.	.	.	.	.	.	.	.	.	.	.	.	.	.	.	.	.	.	.	.	.	.	.	.	.	.	.	.	.	.	IncFIB(K)/100/91.25/560	IncHI1B/82.98/99.15/570	.	.	.
CP103513.1	13.6342	38.3324	1	4	n/a	23	iucA	iroB	rmpA	rmpA2	peg344	.	.	.	.	.	.	.	.	.	.	.	.	.	.	.	.	.	.	.	.	.	.	.	.	.	.	.	.	.	.	.	.	.	IncHI1B/82.98/99.15/570	IncFIB(K)/100/91.25/560	.	.	.
CP103316.1	15.5899	38.2098	1	4	n/a	11	iucA	.	rmpA	rmpA2	peg344	.	.	.	.	.	.	.	.	.	.	.	.	.	.	.	.	.	.	.	.	.	.	.	.	.	.	.	.	.	.	.	.	.	IncHI1B/82.98/99.15/570	IncFIB(K)/100/91.25/560	.	.	.
CP102837.1	16.36	40.3229	1	4	n/a	751	iucA	.	.	rmpA2	.	.	.	.	.	.	.	.	.	.	.	.	.	.	.	.	.	.	.	.	.	.	.	.	.	.	.	.	.	.	.	.	.	.	IncHI1B/82.98/99.15/570	IncFIB(K)/100/91.25/560	.	.	.
CP102439.1	9.0959	37.7655	1	4	n/a	65	iucA	iroB	rmpA	rmpA2	peg344	.	.	.	.	.	.	.	.	.	.	.	.	.	.	.	.	.	.	.	.	.	.	.	.	.	.	.	.	.	.	.	.	.	IncFIB(K)/100/91.25/560	IncHI1B/100/99.3/570	.	.	.
CP102436.1	14.6197	37.6677	1	4	n/a	11	iucA	iroB	rmpA	rmpA2	peg344	.	.	.	.	.	.	.	.	.	.	.	.	.	.	.	.	.	.	.	.	.	.	.	.	.	.	.	.	.	.	.	.	.	IncHI1B/82.98/99.15/570	IncFIB(K)/100/91.25/560	.	.	.
CP102391.1	16.2897	40.8225	1	4	n/a	11	iucA	.	rmpA	rmpA2	peg344	.	.	.	.	.	.	.	.	.	.	.	.	.	.	.	.	.	.	.	.	.	.	.	.	.	.	.	.	.	.	.	.	.	IncHI1B/82.98/99.15/570	IncFIB(K)/100/91.25/560	.	.	.
CP102193.1	15.4277	37.6527	1	4	n/a	11	iucA	.	rmpA	rmpA2	peg344	.	.	.	.	.	.	.	.	.	.	.	.	.	.	.	.	.	.	.	.	.	.	.	.	.	.	.	.	.	.	.	.	.	IncFIB(K)/100/91.25/560	IncHI1B/82.98/99.15/570	.	.	.
CP102187.1	15.5734	38.1865	1	4	n/a	11	iucA	.	rmpA	rmpA2	peg344	.	.	.	.	.	.	.	.	.	.	.	.	.	.	.	.	.	.	.	.	.	.	.	.	.	.	.	.	.	.	.	.	.	IncFIB(K)/100/91.25/560	IncHI1B/82.98/99.15/570	.	.	.
CP101794.1	8.95701	35.8492	1	4	n/a	218	iucA	iroB	rmpA	rmpA2	peg344	.	.	.	.	.	.	.	.	.	.	.	.	.	.	.	.	.	.	.	.	.	.	.	.	.	.	.	.	.	.	.	.	.	IncFIB(K)/100/91.25/560	.	.	.	.
CP101786.1	16.3203	40.1655	1	4	n/a	11	iucA	.	.	rmpA2	.	.	.	.	.	.	.	.	.	.	.	.	.	.	.	.	.	.	.	.	.	.	.	.	.	.	.	.	.	.	.	.	.	.	IncHI1B/82.98/99.15/570	IncFIB(K)/100/91.25/560	.	.	.
CP101774.1	16.416	40.1891	1	4	n/a	11	iucA	.	.	rmpA2	.	.	.	.	.	.	.	.	.	.	.	.	.	.	.	.	.	.	.	.	.	.	.	.	.	.	.	.	.	.	.	.	.	.	IncHI1B/82.98/99.15/570	IncFIB(K)/100/91.25/560	.	.	.
CP101765.1	16.9776	38.2285	0.992395	4	n/a	11	iucA	.	.	rmpA2	.	.	.	.	.	CTX-M-9-like	.	.	.	.	.	.	.	SHV-like	.	.	.	.	.	.	.	.	.	.	.	.	.	.	.	.	.	.	.	blaSHV-12	IncR/100/99.2/251	IncHI1B/82.98/99.15/570	IncFIB(K)/100/91.25/560	IncFII(pHN7A8)/100/100/260	.
CP100602.1	9.23012	37.2338	1	4	n/a	660	iucA	iroB	rmpA	rmpA2	peg344	.	.	.	.	.	.	.	.	.	.	.	.	.	.	.	.	.	.	.	.	.	.	.	.	.	.	.	.	.	.	.	.	.	IncHI1B/100/99.3/570	IncFIB(K)/100/91.25/560	.	.	.
CP100078.1	6.24163	37.5962	0.598052	4	n/a	15	iucA	.	.	rmpA2	.	.	.	.	.	.	.	.	.	.	.	.	.	.	.	.	.	.	.	.	.	.	.	.	.	.	.	.	.	.	.	.	.	.	IncFIB(K)/100/91.25/560	IncHI1B/100/100/570	IncFIB(pKPHS1)/100/99.82/560	.	.
CP099414.1	15.1661	37.6301	1	4	n/a	11	iucA	.	rmpA	rmpA2	peg344	.	.	.	.	.	.	.	.	.	.	.	.	.	.	.	.	.	.	.	.	.	.	.	.	.	.	.	.	.	.	.	.	.	IncHI1B/82.98/99.15/570	IncFIB(K)/100/91.25/560	.	.	.
CP097680.1	15.1996	36.1914	1	4	n/a	11	iucA	iroB	rmpA	rmpA2	peg344	.	.	.	.	.	.	.	.	.	.	.	.	.	.	.	.	.	.	.	.	.	.	.	.	.	.	.	.	.	.	.	.	.	IncFIB(K)/100/91.25/560	IncHI1B/82.98/99.15/570	.	.	.
CP097673.1	10.6019	38.5695	1	4	n/a	11	iucA	.	.	rmpA2	.	.	.	.	.	CTX-M-9-like	.	.	.	.	.	.	.	.	.	.	.	.	.	.	.	.	.	.	.	.	.	.	.	.	.	.	.	.	IncFII(pHN7A8)/100/100/260	IncFIB(K)/100/91.25/560	IncHI1B/100/99.3/570	.	.
CP097652.1	13.24	38.1976	1	4	n/a	23	iucA	iroB	rmpA	rmpA2	peg344	.	.	.	.	.	.	.	.	.	.	.	.	.	.	.	.	.	.	.	.	.	.	.	.	.	.	.	.	.	.	.	.	.	IncHI1B/82.98/99.15/570	IncFIB(K)/100/91.25/560	.	.	.
CP097386.1	6.96038	37.1618	0.769123	4	n/a	15	iucA	.	.	rmpA2	.	.	.	.	.	.	.	.	.	.	.	.	.	.	.	.	.	.	.	.	.	.	.	.	.	.	.	.	.	.	.	.	.	.	IncHI1B/100/100/570	IncFIB(K)/100/91.25/560	.	.	.
CP097083.1	9.27979	38.027	1	4	n/a	268	iucA	iroB	rmpA	rmpA2	peg344	.	.	.	.	.	.	.	.	.	.	.	.	.	.	.	.	.	.	.	.	.	.	.	.	.	.	.	.	.	.	.	.	.	IncHI1B/100/99.3/570	IncFIB(K)/100/91.25/560	.	.	.
CP097080.1	9.2787	38.032	1	4	n/a	268	iucA	iroB	rmpA	rmpA2	peg344	.	.	.	.	.	.	.	.	.	.	.	.	.	.	.	.	.	.	.	.	.	.	.	.	.	.	.	.	.	.	.	.	.	IncFIB(K)/100/91.25/560	IncHI1B/100/99.3/570	.	.	.
CP097077.1	9.0458	38.776	1	4	n/a	268	iucA	iroB	rmpA	rmpA2	peg344	.	.	.	.	.	KPC-like	.	.	.	.	.	.	.	.	.	.	blaKPC-2	.	.	.	.	.	.	.	.	.	.	.	.	.	.	.	.	IncU/100/100/565	IncN/100/99.61/514	IncFIB(K)/100/91.25/560	IncHI1B/100/99.3/570	.
CP096243.1	13.5904	37.6254	1	4	n/a	23	iucA	iroB	rmpA	rmpA2	peg344	.	.	.	.	.	.	.	.	.	.	.	.	.	.	.	.	.	.	.	.	.	.	.	.	.	.	.	.	.	.	.	.	.	IncHI1B/82.98/99.15/570	IncFIB(K)/100/91.25/560	.	.	.
CP096239.1	13.8906	38.2238	1	4	n/a	23	iucA	iroB	rmpA	rmpA2	peg344	.	.	.	.	.	.	.	.	.	.	.	.	.	.	.	.	.	.	.	.	.	.	.	.	.	.	.	.	.	.	.	.	.	IncHI1B/82.98/99.15/570	IncFIB(K)/100/91.25/560	.	.	.
CP096235.1	13.5774	37.5822	1	4	n/a	23	iucA	iroB	rmpA	rmpA2	peg344	.	.	.	.	.	.	.	.	.	.	.	.	.	.	.	.	.	.	.	.	.	.	.	.	.	.	.	.	.	.	.	.	.	IncHI1B/82.98/99.15/570	IncFIB(K)/100/91.25/560	.	.	.
CP096231.1	12.0165	36.1686	0.95736	4	n/a	23	iucA	iroB	rmpA	rmpA2	peg344	.	.	.	.	.	.	.	.	.	.	.	.	.	.	.	.	.	.	.	.	.	.	.	.	.	.	.	.	.	.	.	.	.	IncFIB(K)/100/91.25/560	.	.	.	.
CP095429.1	14.5605	38.6902	1	4	n/a	11	iucA	iroB	.	rmpA2	.	.	.	.	.	.	.	.	.	.	.	.	.	.	.	.	.	.	.	.	.	.	.	.	.	.	.	.	.	.	.	.	.	.	IncFIB(K)/100/91.25/560	IncHI1B/82.98/99.15/570	.	.	.
CP095422.1	10.2965	37.7401	1	4	n/a	11	iucA	.	rmpA	rmpA2	peg344	.	.	.	.	.	.	.	.	.	.	.	.	.	.	.	.	.	.	.	.	.	.	.	.	.	.	.	.	.	.	.	.	.	IncFIB(K)/100/91.25/560	IncHI1B/100/99.3/570	.	.	.
CP095254.1	16.6743	36.7697	0.964673	4	n/a	11	iucA	.	.	rmpA2	.	.	.	.	.	.	.	.	.	.	.	.	.	.	.	.	.	.	.	.	.	.	.	.	.	.	.	.	.	.	.	.	.	.	IncHI1B/82.98/99.15/570	IncFIB(K)/100/91.25/560	.	.	.
CP095241.1	15.5885	40.2509	1	4	n/a	11	iucA	.	rmpA	rmpA2	peg344	.	.	.	.	.	.	.	.	.	.	.	.	.	.	.	.	.	.	.	.	.	.	.	.	.	.	.	.	.	.	.	.	.	IncHI1B/82.98/99.15/570	IncFIB(K)/100/91.25/560	.	.	.
CP094941.1	9.87936	37.7446	1	4	n/a	86	iucA	iroB	rmpA	rmpA2	peg344	.	.	.	.	.	.	.	.	.	.	.	.	.	.	.	.	.	.	.	.	.	.	.	.	.	.	.	.	.	.	.	.	.	IncFIB(K)/100/91.25/560	IncHI1B/100/99.3/570	.	.	.
CP092794.1	15.6765	40.6112	1	4	n/a	11	iucA	.	rmpA	rmpA2	peg344	.	.	.	.	.	.	.	.	.	.	.	.	.	.	.	.	.	.	.	.	.	.	.	.	.	.	.	.	.	.	.	.	.	IncHI1B/82.98/99.15/570	IncFIB(K)/100/91.25/560	.	.	.
CP092787.1	15.7647	40.5617	1	4	n/a	11	iucA	.	rmpA	rmpA2	peg344	.	.	.	.	.	.	.	.	.	.	.	.	.	.	.	.	.	.	.	.	.	.	.	.	.	.	.	.	.	.	.	.	.	IncHI1B/82.98/99.15/570	IncFIB(K)/100/91.25/560	.	.	.
CP091979.1	12.1599	37.1414	1	4	n/a	23	iucA	iroB	rmpA	rmpA2	peg344	.	.	.	.	.	.	.	.	.	.	.	.	.	.	.	.	.	.	.	.	.	.	.	.	.	.	.	.	.	.	.	.	.	IncHI1B/82.98/99.15/570	IncFIB(K)/100/91.25/560	.	.	.
CP091327.1	8.48224	38.6748	1	4	n/a	65	iucA	iroB	rmpA	rmpA2	peg344	.	.	.	.	.	.	.	.	.	.	.	.	.	.	.	.	.	.	.	.	.	.	.	.	.	.	.	.	.	.	.	.	.	IncHI1B/100/99.3/570	IncFIB(K)/100/91.25/560	.	.	.
CP091069.1	15.3857	38.4508	1	4	n/a	11	iucA	.	rmpA	rmpA2	peg344	.	.	.	.	.	.	.	.	.	.	.	.	.	.	.	.	.	.	.	.	.	.	.	.	.	.	.	.	.	.	.	.	.	IncHI1B/82.98/99.15/570	IncFIB(K)/100/91.25/560	.	.	.
CP091062.1	14.1445	37.4011	1	4	n/a	23	iucA	iroB	rmpA	rmpA2	peg344	.	.	.	.	.	.	.	.	.	.	.	.	.	.	.	.	.	.	.	.	.	.	.	.	.	.	.	.	.	.	.	.	.	IncHI1B/82.98/99.15/570	IncFIB(K)/100/91.25/560	.	.	.
CP091059.1	14.1931	37.0994	1	4	n/a	23	iucA	iroB	rmpA	rmpA2	peg344	.	.	.	.	.	.	.	.	.	.	.	.	.	.	.	.	.	.	.	.	.	.	.	.	.	.	.	.	.	.	.	.	.	IncHI1B/82.98/99.15/570	IncFIB(K)/100/91.25/560	.	.	.
CP090469.1	6.59349	37.4102	0.676017	4	n/a	15	iucA	.	.	rmpA2	.	.	.	.	.	.	.	.	.	.	.	.	.	.	.	.	.	.	.	.	.	.	.	.	.	.	.	.	.	.	.	.	.	.	IncHI1B/100/100/570	IncFIB(K)/100/91.25/560	.	.	.
CP090463.1	16.1736	41.1632	1	4	n/a	11	iucA	.	rmpA	rmpA2	peg344	.	.	.	.	.	.	.	.	.	.	.	.	.	.	.	.	.	.	.	.	.	.	.	.	.	.	.	.	.	.	.	.	.	IncHI1B/82.98/99.15/570	IncFIB(K)/100/91.25/560	.	.	.
CP088999.1	17.431	39.7569	0.942443	4	n/a	11	.	.	.	.	.	.	.	.	.	.	.	.	.	.	.	.	.	.	.	.	.	.	.	.	.	.	.	.	.	.	.	.	.	.	.	.	.	.	IncFIB(K)/100/91.25/560	IncHI1B/82.98/99.15/570	.	.	.
CP090433.1	16.3697	40.3633	1	4	n/a	11	iucA	.	.	rmpA2	.	.	.	.	.	.	.	.	.	.	.	.	.	.	.	.	.	.	.	.	.	.	.	.	.	.	.	.	.	.	.	.	.	.	IncHI1B/82.98/99.15/570	IncFIB(K)/100/91.25/560	.	.	.
CP090344.1	16.5092	40.5148	1	4	n/a	11	iucA	.	.	rmpA2	.	.	.	.	.	.	.	.	.	.	.	.	.	.	.	.	.	.	.	.	.	.	.	.	.	.	.	.	.	.	.	.	.	.	IncFIB(K)/100/91.25/560	IncHI1B/82.98/99.15/570	.	.	.
CP090243.1	13.1128	37.0022	1	4	n/a	23	iucA	iroB	rmpA	rmpA2	peg344	.	.	.	.	.	.	.	.	.	.	.	.	.	.	.	.	.	.	.	.	.	.	.	.	.	.	.	.	.	.	.	.	.	IncFIB(K)/100/91.25/560	IncHI1B/82.98/99.15/570	.	.	.
CP090206.1	15.5671	38.2048	1	4	n/a	11	iucA	.	rmpA	rmpA2	peg344	.	.	.	.	.	.	.	.	.	.	.	.	.	.	.	.	.	.	.	.	.	.	.	.	.	.	.	.	.	.	.	.	.	IncFIB(K)/100/91.25/560	IncHI1B/82.98/99.15/570	.	.	.
CP089869.1	14.1399	37.4464	1	4	n/a	23	iucA	iroB	rmpA	rmpA2	peg344	.	.	.	.	.	.	.	.	.	.	.	.	.	.	.	.	.	.	.	.	.	.	.	.	.	.	.	.	.	.	.	.	.	IncHI1B/100/99.3/570	IncFIB(K)/100/91.25/560	.	.	.
CP089860.1	12.9416	37.8794	1	4	n/a	23	iucA	iroB	rmpA	rmpA2	peg344	.	.	.	.	.	.	.	.	.	.	.	.	.	.	.	.	.	.	.	.	.	.	.	.	.	.	.	.	.	.	.	.	.	IncFIB(K)/100/91.25/560	IncHI1B/100/99.3/570	.	.	.
CP089599.1	14.1343	37.4186	1	4	n/a	23	iucA	iroB	rmpA	rmpA2	peg344	.	.	.	.	.	.	.	.	.	.	.	.	.	.	.	.	.	.	.	.	.	.	.	.	.	.	.	.	.	.	.	.	.	IncHI1B/82.98/99.15/570	IncFIB(K)/100/91.25/560	.	.	.
CP089030.1	14.186	37.1836	1	4	n/a	23	iucA	iroB	rmpA	rmpA2	peg344	.	.	.	.	.	.	.	.	.	.	.	.	.	.	.	.	.	.	.	.	.	.	.	.	.	.	.	.	.	.	.	.	.	IncHI1B/82.98/99.15/570	IncFIB(K)/100/91.25/560	.	.	.
CP087641.1	17.5653	40.3334	0.947673	4	n/a	11	.	.	rmpA	.	peg344	.	.	.	.	.	.	.	.	.	.	.	.	.	.	.	.	.	.	.	.	.	.	.	.	.	.	.	.	.	.	.	.	.	IncHI1B/82.98/99.15/570	IncFIB(K)/100/91.25/560	.	.	.
CP089023.1	13.3857	37.0816	1	4	n/a	23	iucA	iroB	rmpA	rmpA2	peg344	.	.	.	.	.	.	.	.	.	.	.	.	.	.	.	.	.	.	.	.	.	.	.	.	.	.	.	.	.	.	.	.	.	IncHI1B/82.98/99.15/570	IncFIB(K)/100/91.25/560	.	.	.
CP089020.1	9.82888	35.2188	1	4	n/a	11	iucA	iroB	rmpA	rmpA2	peg344	.	.	.	.	.	.	.	.	.	.	.	.	.	.	.	.	.	.	.	.	.	.	.	.	.	.	.	.	.	.	.	.	.	IncFIB(K)/100/91.25/560	.	.	.	.
CP089013.1	9.38172	35.8097	1	4	n/a	86	iucA	iroB	rmpA	rmpA2	peg344	.	.	.	.	.	.	.	.	.	.	.	.	.	.	.	.	.	.	.	.	.	.	.	.	.	.	.	.	.	.	.	.	.	IncHI1B/100/99.82/570	IncFIB(K)/100/91.25/560	.	.	.
CP088996.1	15.267	37.4846	1	4	n/a	11	iucA	.	rmpA	rmpA2	peg344	.	.	.	.	.	.	.	.	.	.	.	.	.	.	.	.	.	.	.	.	.	.	.	.	.	.	.	.	.	.	.	.	.	IncHI1B/82.98/99.15/570	IncFIB(K)/100/91.25/560	.	.	.
CP088990.1	8.97893	37.8343	1	4	n/a	-	iucA	iroB	rmpA	rmpA2	peg344	.	.	.	.	.	.	.	.	.	.	.	.	.	.	.	.	.	.	.	.	.	.	.	.	.	.	.	.	.	.	.	.	.	IncHI1B/100/99.3/570	IncFIB(K)/100/91.25/560	.	.	.
CP088987.1	9.00532	35.8012	1	4	n/a	218	iucA	iroB	rmpA	rmpA2	peg344	.	.	.	.	.	.	.	.	.	.	.	.	.	.	.	.	.	.	.	.	.	.	.	.	.	.	.	.	.	.	.	.	.	IncFIB(K)/100/91.25/560	.	.	.	.
CP088984.1	13.4041	37.0407	1	4	n/a	23	iucA	iroB	rmpA	rmpA2	peg344	.	.	.	.	.	.	.	.	.	.	.	.	.	.	.	.	.	.	.	.	.	.	.	.	.	.	.	.	.	.	.	.	.	IncHI1B/82.98/99.15/570	IncFIB(K)/100/91.25/560	.	.	.
CP088270.1	9.99557	36.2367	1	4	n/a	36	iucA	iroB	rmpA	rmpA2	peg344	.	.	.	.	.	.	.	.	.	.	.	.	.	.	.	.	.	.	.	.	.	.	.	.	.	.	.	.	.	.	.	.	.	IncHI1B/100/100/570	IncFIB(K)/100/91.25/560	.	.	.
CP085891.1	16.0319	35.4845	0.773082	4	n/a	11	.	.	rmpA	.	peg344	.	.	.	.	.	.	.	.	.	.	.	.	.	.	.	.	.	.	.	.	.	.	.	.	.	.	.	.	.	.	.	.	.	IncHI1B/82.98/99.15/570	IncFIB(K)/100/91.25/560	.	.	.
CP085479.1	9.15624	34.5148	0.896683	4	n/a	412	.	iroB	rmpA	.	peg344	.	.	.	.	.	.	.	.	.	.	.	.	.	.	.	.	.	.	.	.	.	.	.	.	.	.	.	.	.	.	.	.	.	IncFIB(K)/100/91.25/560	.	.	.	.
CP087664.1	15.2216	38.3852	1	4	n/a	11	iucA	.	rmpA	rmpA2	peg344	.	.	.	.	.	.	.	.	.	.	.	.	.	.	.	.	.	.	.	.	.	.	.	.	.	.	.	.	.	.	.	.	.	IncHI1B/82.98/99.15/570	IncFIB(K)/100/91.25/560	.	.	.
CP087658.1	15.2261	38.3884	1	4	n/a	11	iucA	.	rmpA	rmpA2	peg344	.	.	.	.	.	.	.	.	.	.	.	.	.	.	.	.	.	.	.	.	.	.	.	.	.	.	.	.	.	.	.	.	.	IncHI1B/82.98/99.15/570	IncFIB(K)/100/91.25/560	.	.	.
CP087652.1	15.2722	38.3887	1	4	n/a	11	iucA	.	rmpA	rmpA2	peg344	.	.	.	.	.	.	.	.	.	.	.	.	.	.	.	.	.	.	.	.	.	.	.	.	.	.	.	.	.	.	.	.	.	IncHI1B/82.98/99.15/570	IncFIB(K)/100/91.25/560	.	.	.
CP087631.1	17.1069	36.7728	0.823526	4	n/a	11	iucA	.	.	rmpA2	.	.	.	.	.	.	.	.	.	.	.	.	.	.	.	.	.	.	.	.	.	.	.	.	.	.	.	.	.	.	.	.	.	.	IncHI1B/82.98/99.15/570	IncFIB(K)/100/91.25/560	.	.	.
CP087624.1	15.7644	40.5495	1	4	n/a	11	iucA	.	rmpA	rmpA2	peg344	.	.	.	.	.	.	.	.	.	.	.	.	.	.	.	.	.	.	.	.	.	.	.	.	.	.	.	.	.	.	.	.	.	IncHI1B/82.98/99.15/570	IncFIB(K)/100/91.25/560	.	.	.
CP087152.1	15.6767	40.589	1	4	n/a	11	iucA	.	rmpA	rmpA2	peg344	.	.	.	.	.	.	.	.	.	.	.	.	.	.	.	.	.	.	.	.	.	.	.	.	.	.	.	.	.	.	.	.	.	IncHI1B/82.98/99.15/570	IncFIB(K)/100/91.25/560	.	.	.
CP087147.1	15.6767	40.589	1	4	n/a	11	iucA	.	rmpA	rmpA2	peg344	.	.	.	.	.	.	.	.	.	.	.	.	.	.	.	.	.	.	.	.	.	.	.	.	.	.	.	.	.	.	.	.	.	IncHI1B/82.98/99.15/570	IncFIB(K)/100/91.25/560	.	.	.
CP087143.1	15.6767	40.589	1	4	n/a	11	iucA	.	rmpA	rmpA2	peg344	.	.	.	.	.	.	.	.	.	.	.	.	.	.	.	.	.	.	.	.	.	.	.	.	.	.	.	.	.	.	.	.	.	IncHI1B/82.98/99.15/570	IncFIB(K)/100/91.25/560	.	.	.
CP084869.1	9.88075	37.7444	1	4	n/a	86	iucA	iroB	rmpA	rmpA2	peg344	.	.	.	.	.	.	.	.	.	.	.	.	.	.	.	.	.	.	.	.	.	.	.	.	.	.	.	.	.	.	.	.	.	IncFIB(K)/100/91.25/560	IncHI1B/100/99.3/570	.	.	.
CP084867.1	13.6953	38.2934	1	4	n/a	23	iucA	iroB	rmpA	rmpA2	peg344	.	.	.	.	.	.	.	.	.	.	.	.	.	.	.	.	.	.	.	.	.	.	.	.	.	.	.	.	.	.	.	.	.	IncHI1B/82.98/99.15/570	IncFIB(K)/100/91.25/560	.	.	.
CP084824.1	10.0188	39.3681	0.926881	4	n/a	375	iucA	iroB	rmpA	rmpA2	peg344	.	.	.	.	.	.	.	.	.	.	.	.	.	.	.	.	.	.	.	.	.	.	.	.	.	.	.	.	.	.	.	.	.	IncFIB(K)/100/91.25/560	IncHI1B/100/99.3/570	.	.	.
CP084706.1	16.0418	40.2957	1	4	n/a	11	iucA	.	rmpA	rmpA2	peg344	.	.	.	.	.	.	.	.	.	.	.	.	.	.	.	.	.	.	.	.	.	.	.	.	.	.	.	.	.	.	.	.	.	IncHI1B/82.98/99.15/570	IncFIB(K)/100/91.25/560	.	.	.
CP083752.1	9.77742	35.3546	1	4	n/a	412	iucA	iroB	rmpA	rmpA2	peg344	.	.	.	.	.	.	.	.	.	.	.	.	.	.	.	.	.	.	.	.	.	.	.	.	.	.	.	.	.	.	.	.	.	IncFIB(K)/100/91.25/560	.	.	.	.
CP082806.1	13.6829	36.1693	1	4	n/a	23	iucA	iroB	rmpA	rmpA2	peg344	.	.	.	.	.	.	.	.	.	.	.	.	.	.	.	.	.	.	.	.	.	.	.	.	.	.	.	.	.	.	.	.	.	IncHI1B/82.98/99.15/570	IncFIB(K)/100/91.25/560	.	.	.
CP082766.1	15.7611	40.5228	1	4	n/a	11	iucA	.	rmpA	rmpA2	peg344	.	.	.	.	.	.	.	.	.	.	.	.	.	.	.	.	.	.	.	.	.	.	.	.	.	.	.	.	.	.	.	.	.	IncHI1B/82.98/99.15/570	IncFIB(K)/100/91.25/560	.	.	.
CP082760.1	15.6758	40.6103	1	4	n/a	11	iucA	.	rmpA	rmpA2	peg344	.	.	.	.	.	.	.	.	.	.	.	.	.	.	.	.	.	.	.	.	.	.	.	.	.	.	.	.	.	.	.	.	.	IncHI1B/82.98/99.15/570	IncFIB(K)/100/91.25/560	.	.	.
CP082754.1	15.8462	40.6797	1	4	n/a	11	iucA	.	.	rmpA2	.	.	.	.	.	.	.	.	.	.	.	.	.	.	.	.	.	.	.	.	.	.	.	.	.	.	.	.	.	.	.	.	.	.	IncHI1B/82.98/99.15/570	IncFIB(K)/100/91.25/560	.	.	.
CP082208.1	9.81821	35.2559	1	4	n/a	268	iucA	iroB	rmpA	rmpA2	peg344	.	.	.	.	.	.	.	.	.	.	.	.	.	.	.	.	.	.	.	.	.	.	.	.	.	.	.	.	.	.	.	.	.	IncFIB(K)/100/91.25/560	.	.	.	.
CP080310.1	15.6902	40.7212	1	4	n/a	11	iucA	.	rmpA	rmpA2	peg344	.	.	.	.	.	.	.	.	.	.	.	.	.	.	.	.	.	.	.	.	.	.	.	.	.	.	.	.	.	.	.	.	.	IncHI1B/82.98/99.15/570	IncFIB(K)/100/91.25/560	.	.	.
CP080304.1	15.6797	40.8254	1	4	n/a	11	iucA	.	rmpA	rmpA2	peg344	.	.	.	.	.	.	.	.	.	.	.	.	.	.	.	.	.	.	.	.	.	.	.	.	.	.	.	.	.	.	.	.	.	IncHI1B/82.98/99.15/570	IncFIB(K)/100/91.25/560	.	.	.
CP080298.1	15.6768	40.5904	1	4	n/a	11	iucA	.	rmpA	rmpA2	peg344	.	.	.	.	.	.	.	.	.	.	.	.	.	.	.	.	.	.	.	.	.	.	.	.	.	.	.	.	.	.	.	.	.	IncHI1B/82.98/99.15/570	IncFIB(K)/100/91.25/560	.	.	.
CP079726.1	6.96043	37.1644	0.769379	4	n/a	15	iucA	.	.	rmpA2	.	.	.	.	.	.	.	.	.	.	.	.	.	.	.	.	.	.	.	.	.	.	.	.	.	.	.	.	.	.	.	.	.	.	IncHI1B/100/100/570	IncFIB(K)/100/91.25/560	.	.	.
CP078124.1	15.5355	38.2175	1	4	n/a	11	iucA	.	rmpA	rmpA2	peg344	.	.	.	.	.	.	.	.	.	.	.	.	.	.	.	.	.	.	.	.	.	.	.	.	.	.	.	.	.	.	.	.	.	IncHI1B/82.98/99.15/570	IncFIB(K)/100/91.25/560	.	.	.
CP077778.1	15.2269	37.5251	1	4	n/a	11	iucA	.	rmpA	rmpA2	peg344	.	.	.	.	.	.	.	.	.	.	.	.	.	.	.	.	.	.	.	.	.	.	.	.	.	.	.	.	.	.	.	.	.	IncHI1B/82.98/99.15/570	IncFIB(K)/100/91.25/560	.	.	.
CP076672.1	16.3875	40.3217	1	4	n/a	-	iucA	.	.	rmpA2	.	.	.	.	.	.	.	.	.	.	.	.	.	.	.	.	.	.	.	.	.	.	.	.	.	.	.	.	.	.	.	.	.	.	IncHI1B/82.98/99.15/570	IncFIB(K)/100/91.25/560	.	.	.
CP073784.1	9.51984	37.034	1	4	n/a	420	iucA	iroB	rmpA	rmpA2	peg344	.	.	.	.	.	.	.	.	.	.	.	.	.	.	.	.	.	.	.	.	.	.	.	.	.	.	.	.	.	.	.	.	.	IncHI1B/100/99.3/570	IncFIB(K)/100/91.25/560	.	.	.
CP073289.1	9.52854	37.027	1	4	n/a	592	iucA	iroB	rmpA	rmpA2	peg344	.	.	.	.	.	.	.	.	.	.	.	.	.	.	.	.	.	.	.	.	.	.	.	.	.	.	.	.	.	.	.	.	.	IncHI1B/100/99.3/570	IncFIB(K)/100/91.25/560	.	.	.
CP074582.1	11.923	34.1089	0.672386	4	n/a	35	.	.	.	.	.	.	.	.	.	.	.	.	.	.	.	.	.	.	.	.	.	.	.	.	.	.	.	.	.	.	.	.	.	.	.	.	.	.	.	.	.	.	.
CP073286.1	13.3388	37.3821	1	4	n/a	23	iucA	iroB	rmpA	rmpA2	peg344	.	.	.	.	.	.	.	.	.	.	.	.	.	.	.	.	.	.	.	.	.	.	.	.	.	.	.	.	.	.	.	.	.	IncHI1B/82.98/99.15/570	IncFIB(K)/100/91.25/560	.	.	.
CP072997.1	16.2869	37.6092	1	4	n/a	11	iucA	.	rmpA	rmpA2	.	.	.	.	.	.	.	.	.	.	.	.	.	.	.	.	.	.	.	.	.	.	.	.	.	.	.	.	.	.	.	.	.	.	IncHI1B/82.98/99.15/570	IncFIB(K)/100/91.25/560	.	.	.
CP072940.1	7.69962	37.3864	1	4	n/a	660	iucA	.	.	rmpA2	.	.	.	.	.	.	.	.	.	.	.	.	.	.	.	.	.	.	.	.	.	.	.	.	.	.	.	.	.	.	.	.	.	.	IncHI1B/100/99.3/570	IncFIB(K)/100/91.25/560	.	.	.
CP072654.1	9.40969	36.9727	1	4	n/a	420	iucA	iroB	rmpA	rmpA2	peg344	.	.	.	.	.	.	.	.	.	.	.	.	.	.	.	.	.	.	.	.	.	.	.	.	.	.	.	.	.	.	.	.	.	IncHI1B/100/99.3/570	IncFIB(K)/100/91.25/560	.	.	.
CP072558.1	15.6955	38.1365	1	4	n/a	11	iucA	.	rmpA	rmpA2	peg344	.	.	.	.	.	.	.	.	.	.	.	.	.	.	.	.	.	.	.	.	.	.	.	.	.	.	.	.	.	.	.	.	.	IncHI1B/82.98/99.15/570	IncFIB(K)/100/91.25/560	.	.	.
CP072495.1	9.03401	37.2603	1	4	n/a	660	iucA	iroB	rmpA	rmpA2	peg344	.	.	.	.	.	.	.	.	.	.	.	.	.	.	.	.	.	.	.	.	.	.	.	.	.	.	.	.	.	.	.	.	.	IncHI1B/100/99.3/570	IncFIB(K)/100/91.25/560	.	.	.
CP072493.1	13.7901	38.2239	1	4	n/a	23	iucA	iroB	rmpA	rmpA2	peg344	.	.	.	.	.	.	.	.	.	.	.	.	.	.	.	.	.	.	.	.	.	.	.	.	.	.	.	.	.	.	.	.	.	IncHI1B/82.98/99.15/570	IncFIB(K)/100/91.25/560	.	.	.
CP071323.1	8.44047	38.7577	0.977913	4	n/a	65	iucA	iroB	rmpA	rmpA2	peg344	.	.	.	.	.	.	.	.	.	.	.	.	.	.	.	.	.	.	.	.	.	.	.	.	.	.	.	.	.	.	.	.	.	IncHI1B/100/99.3/570	IncFIB(K)/100/91.25/560	.	.	.
CP070899.1	9.77952	35.3464	1	4	n/a	412	iucA	iroB	rmpA	rmpA2	peg344	.	.	.	.	.	.	.	.	.	.	.	.	.	.	.	.	.	.	.	.	.	.	.	.	.	.	.	.	.	.	.	.	.	IncFIB(K)/100/91.25/560	IncFIB(K)/100/91.25/560	.	.	.
CP069941.1	13.3549	36.6028	1	4	n/a	23	iucA	iroB	rmpA	rmpA2	peg344	.	.	.	.	.	.	.	.	.	.	.	.	.	.	.	.	.	.	.	.	.	.	.	.	.	.	.	.	.	.	.	.	.	IncHI1B/82.98/99.15/570	IncFIB(K)/100/98.93/560	.	.	.
CP069366.1	13.3263	37.6737	1	4	n/a	-	iucA	iroB	rmpA	rmpA2	peg344	.	.	.	.	.	.	.	.	.	.	.	.	.	.	.	.	.	.	.	.	.	.	.	.	.	.	.	.	.	.	.	.	.	IncHI1B/82.98/99.15/570	IncFIB(K)/100/91.25/560	.	.	.
CP069171.1	16.408	40.3889	1	4	n/a	11	iucA	.	.	rmpA2	.	.	.	.	.	.	.	.	.	.	.	.	.	.	.	.	.	.	.	.	.	.	.	.	.	.	.	.	.	.	.	.	.	.	IncFIB(K)/100/91.25/560	IncHI1B/82.98/99.15/570	.	.	.
CP068686.1	12.6282	38.0714	1	4	n/a	11	iucA	iroB	.	rmpA2	peg344	.	.	.	.	.	.	.	.	.	.	.	.	.	.	.	.	.	.	.	.	.	.	.	.	.	.	.	.	.	.	.	.	.	IncHI1B/100/99.3/570	IncFIB(K)/100/91.25/560	.	.	.
CP068016.1	15.0991	36.0083	1	4	n/a	23	iucA	.	.	rmpA2	.	CTX-M-1-like	.	.	.	.	.	.	.	.	.	.	.	.	.	.	.	.	.	.	.	.	.	.	.	.	.	.	.	.	.	.	.	.	IncHI1B/82.98/99.15/570	IncFIB(K)/100/91.25/560	.	.	.
CP067778.1	13.415	36.9071	1	4	n/a	23	iucA	iroB	rmpA	rmpA2	peg344	.	.	.	.	.	.	.	.	.	.	.	.	.	.	.	.	.	.	.	.	.	.	.	.	.	.	.	.	.	.	.	.	.	IncHI1B/82.98/99.15/570	IncFIB(K)/100/91.25/560	.	.	.
CP070901.1	16.3906	34.3085	0.520126	4	n/a	412	.	.	.	.	.	.	.	.	.	.	.	.	.	.	.	.	.	.	.	.	.	.	.	.	.	.	.	.	.	.	.	.	.	.	.	.	.	.	IncFIB(K)/100/91.25/560	.	.	.	.
CP067046.1	7.06392	37.1512	0.803795	4	n/a	43	iucA	.	.	rmpA2	.	.	.	.	.	.	.	.	.	.	.	OXA-48-like	.	.	.	.	.	.	.	.	.	.	.	.	.	.	.	.	.	.	.	.	.	.	IncHI1B/100/100/570	IncFIB(K)/100/91.25/560	.	.	.
CP066905.1	15.2338	37.5474	1	4	n/a	11	iucA	.	rmpA	rmpA2	peg344	.	.	.	.	.	.	.	.	.	.	.	.	.	.	.	.	.	.	.	.	.	.	.	.	.	.	.	.	.	.	.	.	.	IncFIB(K)/100/91.25/560	IncHI1B/82.98/99.15/570	.	.	.
CP066255.1	15.1267	37.6368	1	4	n/a	11	iucA	.	rmpA	rmpA2	peg344	.	.	.	.	.	.	.	.	.	.	.	.	.	.	.	.	.	.	.	.	.	.	.	.	.	.	.	.	.	.	.	.	.	IncHI1B/82.98/99.15/570	IncFIB(K)/100/91.25/560	.	.	.
CP066250.1	15.8112	40.6638	1	4	n/a	11	iucA	.	.	rmpA2	.	.	.	.	.	.	.	.	.	.	.	.	.	.	.	.	.	.	.	.	.	.	.	.	.	.	.	.	.	.	.	.	.	.	IncHI1B/82.98/99.15/570	IncFIB(K)/100/91.25/560	.	.	.
CP066152.1	15.6768	40.5896	1	4	n/a	11	iucA	.	rmpA	rmpA2	peg344	.	.	.	.	.	.	.	.	.	.	.	.	.	.	.	.	.	.	.	.	.	.	.	.	.	.	.	.	.	.	.	.	.	IncHI1B/82.98/99.15/570	IncFIB(K)/100/91.25/560	.	.	.
CP069048.1	12.4554	41.1605	0.520313	4	n/a	258	.	.	.	.	.	.	.	.	.	.	.	.	.	.	.	.	.	.	.	.	.	.	.	.	.	.	.	.	.	.	.	.	.	.	.	.	.	.	.	.	.	.	.
CP065555.1	15.766	38.4945	1	4	n/a	11	iucA	.	rmpA	rmpA2	peg344	.	.	.	.	.	.	.	.	.	.	.	.	.	.	.	.	.	.	.	.	.	.	.	.	.	.	.	.	.	.	.	.	.	IncFIB(K)/100/91.25/560	IncHI1B/82.98/99.15/570	.	.	.
CP065402.1	9.95757	39.3257	0.962856	4	n/a	375	iucA	iroB	rmpA	rmpA2	peg344	.	.	.	.	.	.	.	.	.	.	.	.	.	.	.	.	.	.	.	.	.	.	.	.	.	.	.	.	.	.	.	.	.	IncHI1B/100/99.3/570	IncFIB(K)/100/91.25/560	.	.	.
CP064259.1	17.8087	38.2883	0.707304	4	n/a	11	iucA	.	rmpA	rmpA2	peg344	.	.	.	.	.	KPC-like	.	.	.	.	.	.	.	.	.	.	blaKPC-2	.	.	.	.	.	.	.	.	.	.	.	.	.	.	.	.	IncHI1B/82.98/99.15/570	IncFIB(K)/100/91.25/560	IncFIB(pKPHS1)/100/97.32/560	.	.
CP064242.1	15.4536	37.6492	1	4	n/a	11	iucA	.	rmpA	rmpA2	peg344	.	.	.	.	.	.	.	.	.	.	.	.	.	.	.	.	.	.	.	.	.	.	.	.	.	.	.	.	.	.	.	.	.	IncHI1B/82.98/99.15/570	IncFIB(K)/100/91.25/560	.	.	.
CP064236.1	15.1469	37.6293	1	4	n/a	11	iucA	.	rmpA	rmpA2	peg344	.	.	.	.	.	.	.	.	.	.	.	.	.	.	.	.	.	.	.	.	.	.	.	.	.	.	.	.	.	.	.	.	.	IncHI1B/82.98/99.15/570	IncFIB(K)/100/91.25/560	.	.	.
CP064233.1	13.5355	37.6256	1	4	n/a	23	iucA	iroB	rmpA	rmpA2	peg344	.	.	.	.	.	.	.	.	.	.	.	.	.	.	.	.	.	.	.	.	.	.	.	.	.	.	.	.	.	.	.	.	.	IncFIB(K)/100/91.25/560	IncHI1B/82.98/99.15/570	.	.	.
CP067061.1	16.3789	35.9631	0.825491	4	n/a	23	.	.	.	.	.	.	.	.	.	.	.	.	.	.	.	.	.	.	.	.	.	.	.	.	.	.	.	.	.	.	.	.	.	.	.	.	.	.	IncHI1B/82.98/99.15/570	IncFIB(K)/100/91.25/560	.	.	.
CP064230.1	13.5813	37.6388	1	4	n/a	23	iucA	iroB	rmpA	rmpA2	peg344	.	.	.	.	.	.	.	.	.	.	.	.	.	.	.	.	.	.	.	.	.	.	.	.	.	.	.	.	.	.	.	.	.	IncHI1B/82.98/99.15/570	IncFIB(K)/100/91.25/560	.	.	.
CP064224.1	15.5852	38.1784	1	4	n/a	11	iucA	.	rmpA	rmpA2	peg344	.	.	.	.	.	.	.	.	.	.	.	.	.	.	.	.	.	.	.	.	.	.	.	.	.	.	.	.	.	.	.	.	.	IncFIB(K)/100/91.25/560	IncHI1B/82.98/99.15/570	.	.	.
CP064218.1	15.2721	37.5338	1	4	n/a	11	iucA	.	rmpA	rmpA2	peg344	.	.	.	.	.	.	.	.	.	.	.	.	.	.	.	.	.	.	.	.	.	.	.	.	.	.	.	.	.	.	.	.	.	IncFIB(K)/100/91.25/560	IncHI1B/82.98/99.15/570	.	.	.
CP064212.1	16.7881	38.3381	1	4	n/a	11	iucA	.	rmpA	rmpA2	peg344	.	.	.	.	.	KPC-like	.	.	.	.	.	.	.	.	.	.	blaKPC-2	.	.	.	.	.	.	.	.	.	.	.	.	.	.	.	.	IncFIB(K)/100/91.25/560	IncHI1B/82.98/99.15/570	.	.	.
CP064209.1	12.6462	37.7622	1	4	n/a	23	iucA	iroB	rmpA	rmpA2	peg344	.	.	.	.	.	.	.	.	.	.	.	.	.	.	.	.	.	.	.	.	.	.	.	.	.	.	.	.	.	.	.	.	.	IncHI1B/82.98/99.15/570	IncFIB(K)/100/91.25/560	.	.	.
CP064206.1	13.8914	38.185	1	4	n/a	23	iucA	iroB	rmpA	rmpA2	peg344	.	.	.	.	.	.	.	.	.	.	.	.	.	.	.	.	.	.	.	.	.	.	.	.	.	.	.	.	.	.	.	.	.	IncFIB(K)/100/91.25/560	IncHI1B/82.98/99.15/570	.	.	.
CP063928.1	8.87038	35.7414	1	4	n/a	2158	iucA	iroB	rmpA	rmpA2	peg344	.	.	.	.	.	.	.	.	.	.	.	.	.	.	.	.	.	.	.	.	.	.	.	.	.	.	.	.	.	.	.	.	.	IncFIB(K)/100/91.25/560	.	.	.	.
CP063909.1	13.1051	38.3435	1	4	n/a	23	iucA	iroB	rmpA	rmpA2	peg344	.	.	.	.	.	.	.	.	.	.	.	.	.	.	.	.	.	.	.	.	.	.	.	.	.	.	.	.	.	.	.	.	.	IncHI1B/82.98/99.15/570	IncFIB(K)/100/91.25/560	.	.	.
CP063905.1	9.88163	37.7472	1	4	n/a	86	iucA	iroB	rmpA	rmpA2	peg344	.	.	.	.	.	.	.	.	.	.	.	.	.	.	.	.	.	.	.	.	.	.	.	.	.	.	.	.	.	.	.	.	.	IncFIB(K)/100/91.25/560	IncHI1B/100/99.3/570	.	.	.
CP063891.1	13.5081	37.1567	1	4	n/a	23	iucA	iroB	rmpA	rmpA2	peg344	.	.	.	.	.	.	.	.	.	.	.	.	.	.	.	.	.	.	.	.	.	.	.	.	.	.	.	.	.	.	.	.	.	IncFIB(K)/100/91.25/560	IncHI1B/82.98/99.15/570	.	.	.
CP063834.1	15.1224	37.654	1	4	n/a	11	iucA	.	rmpA	rmpA2	peg344	.	.	.	.	.	.	.	.	.	.	.	.	.	.	.	.	.	.	.	.	.	.	.	.	.	.	.	.	.	.	.	.	.	IncHI1B/82.98/99.15/570	IncFIB(K)/100/91.25/560	.	.	.
CP063760.1	15.2344	38.3882	1	4	n/a	11	iucA	.	rmpA	rmpA2	peg344	.	.	.	.	.	.	.	.	.	.	.	.	.	.	.	.	.	.	.	.	.	.	.	.	.	.	.	.	.	.	.	.	.	IncHI1B/82.98/99.15/570	IncFIB(K)/100/91.25/560	.	.	.
CP063278.1	14.1998	38.1545	1	4	n/a	23	iucA	iroB	rmpA	rmpA2	peg344	.	.	.	.	.	.	.	.	.	.	.	.	.	.	.	.	.	.	.	.	.	.	.	.	.	.	.	.	.	.	.	.	.	IncHI1B/82.98/99.15/570	IncFIB(K)/100/91.25/560	.	.	.
CP061351.1	10.1838	37.4806	1	4	n/a	86	iucA	.	rmpA	rmpA2	peg344	.	.	.	.	.	.	.	.	.	.	.	.	.	.	.	.	.	.	.	.	.	.	.	.	.	.	.	.	.	.	.	.	.	IncHI1B/100/99.3/570	IncFIB(K)/100/91.25/560	.	.	.
CP060282.1	9.10161	37.7879	1	4	n/a	65	iucA	iroB	rmpA	rmpA2	peg344	.	.	.	.	.	.	.	.	.	.	.	.	.	.	.	.	.	.	.	.	.	.	.	.	.	.	.	.	.	.	.	.	.	IncHI1B/100/99.3/570	IncFIB(K)/100/91.25/560	.	.	.
CP059296.1	8.9601	37.9451	1	4	n/a	65	iucA	iroB	rmpA	rmpA2	peg344	.	.	.	.	.	.	.	.	.	.	.	.	.	.	.	.	.	.	.	.	.	.	.	.	.	.	.	.	.	.	.	.	.	IncFIB(K)/100/91.25/560	IncHI1B/100/99.3/570	.	.	.
CP055295.1	15.6765	40.6094	1	4	n/a	11	iucA	.	rmpA	rmpA2	peg344	.	.	.	.	.	.	.	.	.	.	.	.	.	.	.	.	.	.	.	.	.	.	.	.	.	.	.	.	.	.	.	.	.	IncHI1B/82.98/99.15/570	IncFIB(K)/100/91.25/560	.	.	.
CP054781.1	16.3745	40.9667	1	4	n/a	11	iucA	.	rmpA	rmpA2	peg344	.	.	.	.	.	.	.	.	.	.	.	.	.	.	.	.	.	.	.	.	.	.	.	.	.	.	.	.	.	.	.	.	.	IncHI1B/82.98/99.15/570	IncFIB(K)/100/91.25/560	.	.	.
CP063947.1	7.99288	32.5554	0.500636	4	n/a	-	.	.	.	.	.	.	.	.	.	.	.	.	.	.	.	.	.	.	.	.	.	.	.	.	.	.	.	.	.	.	.	.	.	.	.	.	.	.	.	.	.	.	.
CP054775.1	16.3742	40.9662	1	4	n/a	11	iucA	.	rmpA	rmpA2	peg344	.	.	.	.	.	.	.	.	.	.	.	.	.	.	.	.	.	.	.	.	.	.	.	.	.	.	.	.	.	.	.	.	.	IncHI1B/82.98/99.15/570	IncFIB(K)/100/91.25/560	.	.	.
CP054769.1	16.3745	40.9667	1	4	n/a	11	iucA	.	rmpA	rmpA2	peg344	.	.	.	.	.	.	.	.	.	.	.	.	.	.	.	.	.	.	.	.	.	.	.	.	.	.	.	.	.	.	.	.	.	IncHI1B/82.98/99.15/570	IncFIB(K)/100/91.25/560	.	.	.
CP063920.1	8.91033	30.7151	0.378496	4	n/a	1565	.	.	.	.	.	.	.	.	.	.	.	.	.	.	.	.	.	.	.	.	.	.	.	.	.	.	.	.	.	.	.	.	.	.	.	.	.	.	.	.	.	.	.
CP054763.1	16.2819	40.8245	1	4	n/a	11	iucA	.	rmpA	rmpA2	peg344	.	.	.	.	.	.	.	.	.	.	.	.	.	.	.	.	.	.	.	.	.	.	.	.	.	.	.	.	.	.	.	.	.	IncHI1B/82.98/99.15/570	IncFIB(K)/100/91.25/560	.	.	.
CP054757.1	16.3743	40.9657	1	4	n/a	11	iucA	.	rmpA	rmpA2	peg344	.	.	.	.	.	.	.	.	.	.	.	.	.	.	.	.	.	.	.	.	.	.	.	.	.	.	.	.	.	.	.	.	.	IncHI1B/82.98/99.15/570	IncFIB(K)/100/91.25/560	.	.	.
CP054751.1	16.3745	40.9664	1	4	n/a	11	iucA	.	rmpA	rmpA2	peg344	.	.	.	.	.	.	.	.	.	.	.	.	.	.	.	.	.	.	.	.	.	.	.	.	.	.	.	.	.	.	.	.	.	IncHI1B/82.98/99.15/570	IncFIB(K)/100/91.25/560	.	.	.
CP054745.1	16.3742	40.9662	1	4	n/a	11	iucA	.	rmpA	rmpA2	peg344	.	.	.	.	.	.	.	.	.	.	.	.	.	.	.	.	.	.	.	.	.	.	.	.	.	.	.	.	.	.	.	.	.	IncHI1B/82.98/99.15/570	IncFIB(K)/100/91.25/560	.	.	.
CP054739.1	16.3044	40.8113	1	4	n/a	11	iucA	.	rmpA	rmpA2	peg344	.	.	.	.	.	.	.	.	.	.	.	.	.	.	.	.	.	.	.	.	.	.	.	.	.	.	.	.	.	.	.	.	.	IncHI1B/82.98/99.15/570	IncFIB(K)/100/91.25/560	.	.	.
CP054733.1	16.3743	40.9663	1	4	n/a	11	iucA	.	rmpA	rmpA2	peg344	.	.	.	.	.	.	.	.	.	.	.	.	.	.	.	.	.	.	.	.	.	.	.	.	.	.	.	.	.	.	.	.	.	IncHI1B/82.98/99.15/570	IncFIB(K)/100/91.25/560	.	.	.
CP054727.1	16.3742	40.9662	1	4	n/a	11	iucA	.	rmpA	rmpA2	peg344	.	.	.	.	.	.	.	.	.	.	.	.	.	.	.	.	.	.	.	.	.	.	.	.	.	.	.	.	.	.	.	.	.	IncHI1B/82.98/99.15/570	IncFIB(K)/100/91.25/560	.	.	.
CP054721.1	16.3744	40.9663	1	4	n/a	11	iucA	.	rmpA	rmpA2	peg344	.	.	.	.	.	.	.	.	.	.	.	.	.	.	.	.	.	.	.	.	.	.	.	.	.	.	.	.	.	.	.	.	.	IncHI1B/82.98/99.15/570	IncFIB(K)/100/91.25/560	.	.	.
CP054064.1	8.96934	35.8444	1	4	n/a	1764	iucA	iroB	rmpA	rmpA2	peg344	.	.	.	.	.	.	.	.	.	.	.	.	.	.	.	.	.	.	.	.	.	.	.	.	.	.	.	.	.	.	.	.	.	IncFIB(K)/100/91.25/560	.	.	.	.
CP053863.1	12.7031	36.9483	1	4	n/a	1660	iucA	iroB	rmpA	rmpA2	peg344	.	.	.	.	.	.	.	.	.	.	.	.	.	.	.	.	.	.	.	.	.	.	.	.	.	.	.	.	.	.	.	.	.	IncFIB(K)/100/91.25/560	IncHI1B/82.98/99.15/570	.	.	.
CP052563.1	13.3047	37.4174	1	4	n/a	23	iucA	iroB	rmpA	rmpA2	peg344	.	.	.	.	.	.	.	.	.	.	.	.	.	.	.	.	.	.	.	.	.	.	.	.	.	.	.	.	.	.	.	.	.	IncHI1B/82.98/99.15/570	IncFIB(K)/100/91.25/560	.	.	.
CP052495.1	14.2269	36.9877	1	4	n/a	48	iucA	iroB	rmpA	rmpA2	peg344	.	.	.	.	.	.	.	.	.	.	.	.	.	.	.	.	.	.	.	.	.	.	.	.	.	.	.	.	.	.	.	.	.	IncHI1B/82.98/99.15/570	IncFIB(K)/100/91.25/560	.	.	.
CP052432.1	16.23	36.437	1	4	n/a	23	iucA	.	.	rmpA2	.	.	.	.	.	.	.	.	.	.	.	.	.	.	.	.	.	.	.	.	.	.	.	.	.	.	.	.	.	.	.	.	.	.	IncHI1B/82.98/99.15/570	IncFIB(K)/100/91.25/560	.	.	.
CP052363.1	9.92682	37.8665	1	4	n/a	86	iucA	iroB	rmpA	rmpA2	peg344	.	.	.	.	.	.	.	.	.	.	.	.	.	.	.	.	.	.	.	.	.	.	.	.	.	.	.	.	.	.	.	.	.	IncHI1B/100/99.3/570	IncFIB(K)/100/91.25/560	.	.	.
CP052357.1	14.1681	37.0456	1	4	n/a	48	iucA	iroB	rmpA	rmpA2	peg344	.	.	.	.	.	.	.	.	.	.	.	.	.	.	.	.	.	.	.	.	.	.	.	.	.	.	.	.	.	.	.	.	.	IncHI1B/82.98/99.15/570	IncFIB(K)/100/91.25/560	.	.	.
CP052304.1	14.1844	37.0407	1	4	n/a	48	iucA	iroB	rmpA	rmpA2	peg344	.	.	.	.	.	.	.	.	.	.	.	.	.	.	.	.	.	.	.	.	.	.	.	.	.	.	.	.	.	.	.	.	.	IncHI1B/82.98/99.15/570	IncFIB(K)/100/91.25/560	.	.	.
CP052259.1	9.07	37.808	1	4	n/a	65	iucA	iroB	rmpA	rmpA2	peg344	.	.	.	.	.	.	.	.	.	.	.	.	.	.	.	.	.	.	.	.	.	.	.	.	.	.	.	.	.	.	.	.	.	IncHI1B/100/99.3/570	IncFIB(K)/100/91.25/560	.	.	.
CP052232.1	14.8541	35.6931	0.993018	4	n/a	48	iucA	.	rmpA	rmpA2	.	.	.	.	.	.	.	.	.	.	.	.	.	.	.	.	.	.	.	.	.	.	.	.	.	.	.	.	.	.	.	.	.	.	IncHI1B/82.98/99.15/570	IncFIB(K)/100/91.25/560	.	.	.
CP052204.1	14.2004	37.2276	1	4	n/a	48	iucA	iroB	rmpA	rmpA2	peg344	.	.	.	.	.	.	.	.	.	.	.	.	.	.	.	.	.	.	.	.	.	.	.	.	.	.	.	.	.	.	.	.	.	IncHI1B/82.98/99.15/570	IncFIB(K)/100/91.25/560	.	.	.
CP052190.1	14.1324	37.1614	1	4	n/a	48	iucA	iroB	rmpA	rmpA2	peg344	.	.	.	.	.	.	.	.	.	.	.	.	.	.	.	.	.	.	.	.	.	.	.	.	.	.	.	.	.	.	.	.	.	IncHI1B/82.98/99.15/570	IncFIB(K)/100/91.25/560	.	.	.
CP052178.1	14.3436	36.745	1	4	n/a	48	iucA	iroB	rmpA	rmpA2	peg344	.	.	.	.	.	.	.	.	.	.	.	.	.	.	.	.	.	.	.	.	.	.	.	.	.	.	.	.	.	.	.	.	.	IncHI1B/82.98/99.15/570	IncFIB(K)/100/91.25/560	.	.	.
CP052163.1	14.1691	37.2813	1	4	n/a	48	iucA	iroB	rmpA	rmpA2	peg344	.	.	.	.	.	.	.	.	.	.	.	.	.	.	.	.	.	.	.	.	.	.	.	.	.	.	.	.	.	.	.	.	.	IncHI1B/82.98/99.15/570	IncFIB(K)/100/91.25/560	.	.	.
CP052159.1	14.1278	36.8779	1	4	n/a	48	iucA	iroB	rmpA	rmpA2	peg344	.	.	.	.	.	.	.	.	.	.	.	.	.	.	.	.	.	.	.	.	.	.	.	.	.	.	.	.	.	.	.	.	.	IncHI1B/82.98/99.15/570	IncFIB(K)/100/91.25/560	.	.	.
CP052144.1	14.1434	37.3369	1	4	n/a	48	iucA	iroB	rmpA	rmpA2	peg344	.	.	.	.	.	.	.	.	.	.	.	.	.	.	.	.	.	.	.	.	.	.	.	.	.	.	.	.	.	.	.	.	.	IncHI1B/82.98/99.15/570	IncFIB(K)/100/91.25/560	.	.	.
CP052037.1	9.01715	37.269	1	4	n/a	660	iucA	iroB	rmpA	rmpA2	peg344	.	.	.	.	.	.	.	.	.	.	.	.	.	.	.	.	.	.	.	.	.	.	.	.	.	.	.	.	.	.	.	.	.	IncFIB(K)/100/91.25/560	IncHI1B/100/99.3/570	.	.	.
CP050281.1	15.3949	37.4911	1	4	n/a	11	iucA	.	rmpA	rmpA2	peg344	.	.	.	.	.	.	.	.	.	.	.	.	.	.	.	.	.	.	.	.	.	.	.	.	.	.	.	.	.	.	.	.	.	IncHI1B/82.98/99.15/570	IncFIB(K)/100/91.25/560	.	.	.
CP050276.1	17.8135	38.2904	0.70594	4	n/a	-	iucA	.	rmpA	rmpA2	peg344	.	.	.	.	.	KPC-like	.	.	.	.	.	.	.	.	.	.	blaKPC-2	.	.	.	.	.	.	.	.	.	.	.	.	.	.	.	.	IncHI1B/82.98/99.15/570	IncFIB(K)/100/91.25/560	IncFIB(pKPHS1)/100/97.32/560	.	.
CP047678.1	13.3594	37.3842	1	4	n/a	23	iucA	iroB	rmpA	rmpA2	peg344	.	.	.	.	.	.	.	.	.	.	.	.	.	.	.	.	.	.	.	.	.	.	.	.	.	.	.	.	.	.	.	.	.	IncFIB(K)/100/91.25/560	IncHI1B/78.95/99.11/570	.	.	.
CP047676.1	13.3744	37.3779	1	4	n/a	23	iucA	iroB	rmpA	rmpA2	peg344	.	.	.	.	.	.	.	.	.	.	.	.	.	.	.	.	.	.	.	.	.	.	.	.	.	.	.	.	.	.	.	.	.	IncFIB(K)/100/91.25/560	IncHI1B/78.95/99.11/570	.	.	.
CP047596.1	13.7237	39.9479	0.801183	4	n/a	23	iucA	iroB	rmpA	rmpA2	peg344	.	.	.	.	.	.	.	.	.	.	.	.	.	.	.	.	.	.	.	.	.	.	.	.	.	.	.	.	.	.	.	.	.	IncHI1B/82.98/99.15/570	IncFIB(K)/100/91.25/560	.	.	.
CP047193.1	15.2466	38.3849	1	4	n/a	11	iucA	.	rmpA	rmpA2	peg344	.	.	.	.	.	.	.	.	.	.	.	.	.	.	.	.	.	.	.	.	.	.	.	.	.	.	.	.	.	.	.	.	.	IncHI1B/82.98/99.15/570	IncFIB(K)/100/91.25/560	.	.	.
CP046897.1	10.0598	37.3149	1	4	n/a	86	iucA	iroB	rmpA	rmpA2	peg344	.	.	.	.	.	.	.	.	.	.	.	.	.	.	.	.	.	.	.	.	.	.	.	.	.	.	.	.	.	.	.	.	.	IncHI1B/100/99.3/570	IncFIB(K)/100/91.25/560	.	.	.
CP046893.1	13.5309	37.1548	1	4	n/a	23	iucA	iroB	rmpA	rmpA2	peg344	.	.	.	.	.	.	.	.	.	.	.	.	.	.	.	.	.	.	.	.	.	.	.	.	.	.	.	.	.	.	.	.	.	IncHI1B/82.98/99.15/570	IncFIB(K)/100/91.25/560	.	.	.
CP045692.1	18.4576	34.5686	0.408059	4	n/a	-	iucA	iroB	rmpA	.	peg344	.	.	.	.	.	.	.	.	.	.	.	.	.	.	.	.	.	.	.	.	.	.	.	.	.	.	.	.	.	.	.	.	.	IncFIB(K)/100/91.25/560	IncR/100/99.6/251	.	.	.
CP045675.1	6.96056	37.1639	0.769377	4	n/a	15	iucA	.	.	rmpA2	.	.	.	.	.	.	.	.	.	.	.	.	.	.	.	.	.	.	.	.	.	.	.	.	.	.	.	.	.	.	.	.	.	.	IncHI1B/100/100/570	IncFIB(K)/100/91.25/560	.	.	.
CP043581.1	13.5756	37.3309	1	4	n/a	23	iucA	iroB	rmpA	rmpA2	peg344	.	.	.	.	.	.	.	.	.	.	.	.	.	.	.	.	.	.	.	.	.	.	.	.	.	.	.	.	.	.	.	.	.	IncHI1B/82.98/99.15/570	IncFIB(K)/100/91.25/560	.	.	.
CP043375.1	13.4974	36.5039	1	4	n/a	23	iucA	iroB	rmpA	rmpA2	peg344	.	.	.	.	.	.	.	.	.	.	.	.	.	.	.	.	.	.	.	.	.	.	.	.	.	.	.	.	.	.	.	.	.	IncHI1B/82.98/99.15/570	IncFIB(K)/100/91.25/560	.	.	.
CP041374.1	15.7648	40.5078	1	4	n/a	11	iucA	.	rmpA	rmpA2	peg344	.	.	.	.	.	.	.	.	.	.	.	.	.	.	.	.	.	.	.	.	.	.	.	.	.	.	.	.	.	.	.	.	.	IncHI1B/82.98/99.15/570	IncFIB(K)/100/91.25/560	.	.	.
CP041024.1	9.7925	35.3223	1	4	n/a	268	iucA	iroB	rmpA	rmpA2	peg344	.	.	.	.	.	.	.	.	.	.	.	.	.	.	.	.	.	.	.	.	.	.	.	.	.	.	.	.	.	.	.	.	.	IncFIB(K)/100/91.25/560	.	.	.	.
CP052445.1	15.8994	35.0371	0.66721	4	n/a	48	.	iroB	.	.	peg344	.	.	.	.	.	.	.	.	.	.	.	.	.	.	.	.	.	.	.	.	.	.	.	.	.	.	.	.	.	.	.	.	.	IncFIB(K)/100/91.25/560	.	.	.	.
CP040595.1	6.82931	36.9838	0.716387	4	n/a	15	iucA	.	.	rmpA2	.	.	.	.	.	.	.	.	.	.	.	.	.	.	.	.	.	.	.	.	.	.	.	.	.	.	.	.	.	.	.	.	.	.	IncFIB(K)/100/91.25/560	IncHI1B/100/100/570	.	.	.
CP040546.1	17.1228	36.7679	0.817635	4	n/a	11	iucA	.	.	rmpA2	.	.	.	.	.	.	.	.	.	.	.	.	.	.	.	.	.	.	.	.	.	.	.	.	.	.	.	.	.	.	.	.	.	.	IncHI1B/82.98/99.15/570	IncFIB(K)/100/91.25/560	.	.	.
CP040540.1	17.2038	36.7402	1	4	n/a	11	iucA	.	.	rmpA2	.	.	.	.	.	.	.	.	.	.	.	.	.	.	.	.	.	.	.	.	.	.	.	.	.	.	.	.	.	.	.	.	.	.	IncHI1B/82.98/99.15/570	IncFIB(K)/100/91.25/560	.	.	.
CP052317.1	16.2497	34.7558	0.599358	4	n/a	48	.	.	.	.	.	.	.	.	.	.	.	.	.	.	.	.	.	.	.	.	.	.	.	.	.	.	.	.	.	.	.	.	.	.	.	.	.	.	IncFIB(K)/100/91.25/560	.	.	.	.
CP040534.1	17.1147	36.7709	0.820753	4	n/a	11	iucA	.	.	rmpA2	.	.	.	.	.	.	.	.	.	.	.	.	.	.	.	.	.	.	.	.	.	.	.	.	.	.	.	.	.	.	.	.	.	.	IncHI1B/82.98/99.15/570	IncFIB(K)/100/91.25/560	.	.	.
CP037743.1	13.2866	37.6733	1	4	n/a	23	iucA	iroB	rmpA	rmpA2	peg344	.	.	.	.	.	.	.	.	.	.	.	.	.	.	.	.	.	.	.	.	.	.	.	.	.	.	.	.	.	.	.	.	.	IncHI1B/82.98/99.15/570	IncFIB(K)/100/91.25/560	.	.	.
CP036191.1	12.1	35.5468	0.819008	4	n/a	23	iucA	iroB	rmpA	rmpA2	peg344	.	.	.	.	.	.	.	.	.	.	.	.	.	.	.	.	.	.	.	.	.	.	.	.	.	.	.	.	.	.	.	.	.	IncFIB(K)/100/91.25/560	.	.	.	.
CP035906.1	12.0935	35.5497	0.817596	4	n/a	23	iucA	iroB	rmpA	rmpA2	peg344	.	.	.	.	.	.	.	.	.	.	.	.	.	.	.	.	.	.	.	.	.	.	.	.	.	.	.	.	.	.	.	.	.	IncFIB(K)/100/91.25/560	.	.	.	.
CP035384.1	13.9489	34.7466	0.743765	4	n/a	23	iucA	iroB	rmpA	rmpA2	peg344	.	.	.	.	.	.	.	.	.	.	.	.	.	.	.	.	.	.	.	.	.	.	.	.	.	.	.	.	.	.	.	.	.	IncFII(K)/100/97.3/148	IncFIB(K)/100/91.25/560	IncHI1B/82.98/99.15/570	.	.
CP034776.1	10.1142	37.3007	1	4	n/a	86	iucA	iroB	rmpA	rmpA2	peg344	.	.	.	.	.	.	.	.	.	.	.	.	.	.	.	.	.	.	.	.	.	.	.	.	.	.	.	.	.	.	.	.	.	IncFIB(K)/100/91.25/560	IncHI1B/100/99.3/570	.	.	.
CP034416.1	15.1091	37.6679	1	4	n/a	11	iucA	.	rmpA	rmpA2	peg344	.	.	.	.	.	.	.	.	.	.	.	.	.	.	.	.	.	.	.	.	.	.	.	.	.	.	.	.	.	.	.	.	.	IncHI1B/82.98/99.15/570	IncFIB(K)/100/91.25/560	.	.	.
CP034124.1	16.0847	40.2549	1	4	n/a	11	iucA	.	rmpA	rmpA2	peg344	.	.	.	.	.	.	.	.	.	.	.	.	.	.	.	.	.	.	.	.	.	.	.	.	.	.	.	.	.	.	.	.	.	IncHI1B/82.98/99.15/570	IncFIB(K)/100/91.25/560	.	.	.
CP034083.1	13.6157	37.6346	1	4	n/a	23	iucA	iroB	rmpA	rmpA2	peg344	.	.	.	.	.	.	.	.	.	.	.	.	.	.	.	.	.	.	.	.	.	.	.	.	.	.	.	.	.	.	.	.	.	IncHI1B/82.98/99.15/570	IncFIB(K)/100/91.25/560	.	.	.
CP033961.1	17.4839	37.0377	0.757732	4	n/a	11	iucA	.	.	rmpA2	.	.	.	.	.	.	.	.	.	.	.	.	.	.	.	.	.	.	.	.	.	.	.	.	.	.	.	.	.	.	.	.	.	.	IncHI1B/82.98/99.15/570	IncFIB(K)/100/91.25/560	.	.	.
CP033955.1	15.7574	40.5322	1	4	n/a	11	iucA	.	rmpA	rmpA2	peg344	.	.	.	.	.	.	.	.	.	.	.	.	.	.	.	.	.	.	.	.	.	.	.	.	.	.	.	.	.	.	.	.	.	IncHI1B/82.98/99.15/570	IncFIB(K)/100/91.25/560	.	.	.
CP032834.1	18.4606	34.5736	0.407885	4	n/a	91	iucA	.	rmpA	.	.	.	.	.	.	.	.	.	.	.	.	.	.	.	.	.	.	.	.	.	.	.	.	.	.	.	.	.	.	.	.	.	.	.	IncFIB(K)/100/91.07/560	.	.	.	.
CP032241.1	15.2624	38.3779	1	4	n/a	11	iucA	.	rmpA	rmpA2	peg344	.	.	.	.	.	.	.	.	.	.	.	.	.	.	.	.	.	.	.	.	.	.	.	.	.	.	.	.	.	.	.	.	.	IncFIB(K)/100/91.25/560	IncHI1B/82.98/99.15/570	.	.	.
CP032164.1	15.8591	37.344	1	4	n/a	11	iucA	.	.	rmpA2	.	.	.	.	.	.	.	.	.	.	.	.	.	.	.	.	.	.	.	.	.	.	.	.	.	.	.	.	.	.	.	.	.	.	IncHI1B/82.98/99.15/570	IncFIB(K)/100/91.25/560	.	.	.
CP031935.1	15.7589	40.482	1	4	n/a	11	iucA	.	rmpA	rmpA2	peg344	.	.	.	.	.	.	.	.	.	.	.	.	.	.	.	.	.	.	.	.	.	.	.	.	.	.	.	.	.	.	.	.	.	IncHI1B/82.98/99.15/570	IncFIB(K)/100/91.25/560	.	.	.
CP030924.1	9.96959	39.3629	0.942914	4	n/a	375	iucA	iroB	rmpA	rmpA2	peg344	.	.	.	.	.	.	.	.	.	.	.	.	.	.	.	.	.	.	.	.	.	.	.	.	.	.	.	.	.	.	.	.	.	IncFIB(K)/100/91.25/560	IncHI1B/100/99.3/570	.	.	.
CP030321.1	9.77719	35.3503	1	4	n/a	412	iucA	iroB	rmpA	rmpA2	peg344	.	.	.	.	.	.	.	.	.	.	.	.	.	.	.	.	.	.	.	.	.	.	.	.	.	.	.	.	.	.	.	.	.	IncFIB(K)/100/91.25/560	.	.	.	.
CP030314.1	9.77682	35.3507	1	4	n/a	412	iucA	iroB	rmpA	rmpA2	peg344	.	.	.	.	.	.	.	.	.	.	.	.	.	.	.	.	.	.	.	.	.	.	.	.	.	.	.	.	.	.	.	.	.	IncFIB(K)/100/91.25/560	.	.	.	.
CP030312.1	10.0412	37.2285	1	4	n/a	86	iucA	iroB	rmpA	rmpA2	peg344	.	.	.	.	.	.	.	.	.	.	.	.	.	.	.	.	.	.	.	.	.	.	.	.	.	.	.	.	.	.	.	.	.	IncHI1B/100/99.3/570	IncFIB(K)/100/91.25/560	.	.	.
CP030270.1	11.1668	35.3483	0.776736	4	n/a	1660	iucA	iroB	rmpA	rmpA2	peg344	.	.	.	.	.	.	.	.	.	.	.	.	.	.	.	.	.	.	.	.	.	.	.	.	.	.	.	.	.	.	.	.	.	IncFIB(K)/100/91.25/560	.	.	.	.
CP029383.2	15.9157	36.1488	1	4	n/a	11	iucA	.	rmpA	rmpA2	peg344	.	.	.	.	.	.	.	.	.	.	.	.	.	.	.	.	.	.	.	.	.	.	.	.	.	.	.	.	.	.	.	.	.	IncHI1B/82.98/99.15/570	IncFIB(K)/100/91.25/560	.	.	.
CP028852.1	13.7248	38.2589	1	4	n/a	23	iucA	iroB	rmpA	rmpA2	peg344	.	.	.	.	.	.	.	.	.	.	.	.	.	.	.	.	.	.	.	.	.	.	.	.	.	.	.	.	.	.	.	.	.	IncHI1B/82.98/99.15/570	IncFIB(K)/100/91.25/560	.	.	.
CP028390.2	9.89911	36.2619	1	4	n/a	36	iucA	iroB	rmpA	rmpA2	peg344	.	.	.	.	.	.	.	.	.	.	.	.	.	.	.	.	.	.	.	.	.	.	.	.	.	.	.	.	.	.	.	.	.	IncHI1B/100/100/570	IncFIB(K)/100/91.25/560	.	.	.
CP027867.1	13.3456	37.7152	1	4	n/a	23	iucA	iroB	rmpA	rmpA2	peg344	.	.	.	.	.	.	.	.	.	.	.	.	.	.	.	.	.	.	.	.	.	.	.	.	.	.	.	.	.	.	.	.	.	IncFIB(K)/100/91.25/560	IncHI1B/82.98/99.15/570	.	.	.
CP027803.1	13.9617	34.6779	0.722719	4	n/a	23	iucA	iroB	rmpA	rmpA2	peg344	CTX-M-1-like	.	.	.	.	.	.	.	.	.	.	.	.	blaCTX-M-15	.	.	.	.	.	.	.	.	.	.	.	.	.	.	.	.	.	.	.	IncFII(K)/100/98.65/148	IncHI1B/82.98/99.15/570	IncFIB(K)/100/91.25/560	.	.
CP026587.1	10.0615	37.3179	1	4	n/a	86	iucA	iroB	rmpA	rmpA2	peg344	.	.	.	.	.	.	.	.	.	.	.	.	.	.	.	.	.	.	.	.	.	.	.	.	.	.	.	.	.	.	.	.	.	IncHI1B/100/99.3/570	IncFIB(K)/100/91.25/560	.	.	.
CP026166.1	8.96307	35.8391	1	4	n/a	3685	iucA	iroB	rmpA	rmpA2	peg344	.	.	.	.	.	.	.	.	.	.	.	.	.	.	.	.	.	.	.	.	.	.	.	.	.	.	.	.	.	.	.	.	.	IncFIB(K)/100/91.25/560	.	.	.	.
CP026024.1	13.6753	36.7528	1	4	n/a	1265	iucA	iroB	rmpA	rmpA2	peg344	.	.	.	.	.	.	.	.	.	.	.	.	.	.	.	.	.	.	.	.	.	.	.	.	.	.	.	.	.	.	.	.	.	IncHI1B/82.98/99.15/570	IncFIB(K)/100/91.25/560	.	.	.
CP042975.1	10.8581	38.2577	1	4	n/a	86	.	iroB	rmpA	.	peg344	.	.	.	.	.	.	.	.	.	.	.	.	.	.	.	.	.	.	.	.	.	.	.	.	.	.	.	.	.	.	.	.	.	IncFIB(K)/100/91.25/560	IncHI1B/100/99.3/570	.	.	.
CP026022.1	13.0556	35.5897	1	4	n/a	23	iucA	iroB	rmpA	rmpA2	peg344	.	.	.	.	CTX-M-9-like	.	.	.	.	.	.	.	.	.	.	.	.	.	.	.	.	.	.	.	.	.	.	.	.	.	.	.	.	IncFIB(K)/100/91.25/560	IncHI1B/82.98/99.15/570	.	.	.
CP026012.1	12.5854	37.2208	1	4	n/a	23	iucA	iroB	rmpA	rmpA2	peg344	.	.	.	.	.	.	.	.	.	.	.	.	.	.	.	.	.	.	.	.	.	.	.	.	.	.	.	.	.	.	.	.	.	IncHI1B/100/99.3/570	IncFIB(K)/100/91.25/560	.	.	.
CP025081.1	13.8429	38.1651	1	4	n/a	23	iucA	iroB	rmpA	rmpA2	peg344	.	.	.	.	.	.	.	.	.	.	.	.	.	.	.	.	.	.	.	.	.	.	.	.	.	.	.	.	.	.	.	.	.	IncHI1B/82.98/99.15/570	IncFIB(K)/100/91.25/560	.	.	.
CP024708.1	9.10816	37.7736	1	4	n/a	65	iucA	iroB	rmpA	rmpA2	peg344	.	.	.	.	.	.	.	.	.	.	.	.	.	.	.	.	.	.	.	.	.	.	.	.	.	.	.	.	.	.	.	.	.	IncHI1B/100/99.3/570	IncFIB(K)/100/91.25/560	.	.	.
CP023135.2	8.69906	35.4733	1	4	n/a	3813	iucA	iroB	rmpA	rmpA2	peg344	.	.	.	.	.	.	.	.	.	.	.	.	.	.	.	.	.	.	.	.	.	.	.	.	.	.	.	.	.	.	.	.	.	IncFIB(K)/99.64/91.07/560	.	.	.	.
CP019049.1	13.7988	36.7766	1	4	n/a	23	iucA	iroB	rmpA	rmpA2	peg344	.	.	.	.	.	.	.	.	.	.	.	.	.	.	.	.	.	.	.	.	.	.	.	.	.	.	.	.	.	.	.	.	.	IncFIB(K)/100/91.25/560	IncHI1B/100/99.3/570	.	.	.
CP018338.1	8.27682	35.9103	1	4	n/a	23	iucA	.	rmpA	rmpA2	peg344	.	.	.	.	.	.	.	.	.	.	.	.	.	.	.	.	.	.	.	.	.	.	.	.	.	.	.	.	.	.	.	.	.	IncFIB(K)/100/91.25/560	.	.	.	.
CP016815.1	12.6436	36.9942	1	4	n/a	23	iucA	iroB	rmpA	rmpA2	peg344	.	.	.	.	.	.	.	.	.	.	.	.	.	.	.	.	.	.	.	.	.	.	.	.	.	.	.	.	.	.	.	.	.	IncFIB(K)/100/91.25/560	IncHI1B/100/99.3/570	.	.	.
CP014011.1	13.5478	37.6694	1	4	n/a	23	iucA	iroB	rmpA	rmpA2	peg344	.	.	.	.	.	.	.	.	.	.	.	.	.	.	.	.	.	.	.	.	.	.	.	.	.	.	.	.	.	.	.	.	.	IncHI1B/82.98/99.15/570	IncFIB(K)/100/91.25/560	.	.	.
CP014009.1	12.9916	37.8132	1	4	n/a	374	iucA	iroB	rmpA	rmpA2	peg344	.	.	.	.	.	.	.	.	.	.	.	.	.	.	.	.	.	.	.	.	.	.	.	.	.	.	.	.	.	.	.	.	.	IncHI1B/100/99.3/570	IncFIB(K)/100/91.25/560	.	.	.
CP002911.1	9.98556	39.3641	0.937897	4	n/a	375	iucA	iroB	rmpA	rmpA2	peg344	.	.	.	.	.	.	.	.	.	.	.	.	.	.	.	.	.	.	.	.	.	.	.	.	.	.	.	.	.	.	.	.	.	IncHI1B/100/99.3/570	IncFIB(K)/100/91.25/560	.	.	.
AP025247.1	12.9443	38.736	1	4	n/a	23	iucA	iroB	rmpA	rmpA2	peg344	.	.	.	.	.	.	.	.	.	.	.	.	.	.	.	.	.	.	.	.	.	.	.	.	.	.	.	.	.	.	.	.	.	IncHI1B/82.98/99.15/570	IncFIB(K)/100/91.25/560	.	.	.
AP006726.1	12.6786	37.2622	1	4	n/a	23	iucA	iroB	rmpA	rmpA2	peg344	.	.	.	.	.	.	.	.	.	.	.	.	.	.	.	.	.	.	.	.	.	.	.	.	.	.	.	.	.	.	.	.	.	IncFIB(K)/100/91.25/560	IncHI1B/100/99.3/570	.	.	.
AP019666.1	10.006	34.8818	0.857433	4	n/a	268	.	iroB	rmpA	.	peg344	.	.	.	.	.	.	.	.	.	.	.	.	.	.	.	.	.	.	.	.	.	.	.	.	.	.	.	.	.	.	.	.	.	IncFIB(K)/100/91.25/560	.	.	.	.
977691_p4	23.7961	-48.4928	0.549124	5	Thailand	17	.	.	.	.	.	.	.	.	.	.	.	.	.	.	.	.	.	.	.	.	.	.	.	.	.	.	.	.	.	.	.	.	.	.	.	.	.	.	.	.	.	.	.
480738_p3	23.6558	-48.2643	0.504417	5	Thailand	45	.	.	.	.	.	CTX-M-1-like	.	.	.	.	.	.	.	.	.	.	.	.	.	.	.	.	.	.	.	.	.	.	.	.	.	.	.	.	.	.	.	.	.	.	.	.	.
740859_p3	24.9407	-48.1822	0.971581	5	Ukraine	23	.	.	.	.	.	.	.	.	.	.	.	.	.	.	.	.	.	.	.	.	.	.	.	.	.	.	.	.	.	.	.	.	.	.	.	.	.	.	.	.	.	.	.
OW969941.1	22.8653	-48.4313	0.348471	5	n/a	11	.	.	.	.	.	.	.	.	.	.	.	.	.	.	.	.	.	.	.	.	.	.	.	.	.	.	.	.	.	.	.	.	.	.	.	.	.	.	.	.	.	.	.
LR890720.1	23.8038	-50.3194	0.304147	5	n/a	661	.	.	.	.	.	.	.	.	.	.	.	.	.	.	.	.	.	.	.	.	.	.	.	.	.	.	.	.	.	.	.	.	.	.	.	.	.	.	IncFIB(K)/100/99.11/560	IncFII(pKPX1)/100/98.79/577	.	.	.
LR890597.1	23.0612	-48.4279	0.382306	5	n/a	3072	.	.	.	.	.	CTX-M-1-like	.	.	.	.	.	.	.	.	.	.	.	.	.	.	.	.	.	.	.	.	.	.	.	.	.	.	.	.	.	.	.	.	.	.	.	.	.
CP119177.1	25.9708	-48.4003	1	5	n/a	11	.	.	.	.	.	.	.	.	.	.	.	.	.	.	.	.	.	.	.	.	.	.	.	.	.	.	.	.	.	.	.	.	.	.	.	.	.	.	.	.	.	.	.
CP116906.1	24.9457	-48.1201	0.99844	5	n/a	11	.	.	.	.	.	.	.	.	.	.	.	.	.	.	.	.	.	.	.	.	.	.	.	.	.	.	.	.	.	.	.	.	.	.	.	.	.	.	.	.	.	.	.
CP116493.1	26.4603	-48.1781	0.593516	5	n/a	11	.	.	.	.	.	.	.	.	.	.	.	.	.	.	.	.	.	.	.	.	.	.	.	.	.	.	.	.	.	.	.	.	.	.	.	.	.	.	ColRNAI/100/98.46/130	.	.	.	.
CP115838.1	25.5394	-50.0254	0.418112	5	n/a	1583	.	.	.	.	.	.	.	.	.	.	.	.	.	.	.	.	.	SHV-like	.	.	.	.	.	.	.	.	.	.	.	.	.	.	.	.	.	.	.	blaSHV-12	.	.	.	.	.
CP109976.1	24.9457	-48.1221	0.996598	5	n/a	11	.	.	.	.	.	.	.	.	.	.	.	.	.	.	.	.	.	.	.	.	.	.	.	.	.	.	.	.	.	.	.	.	.	.	.	.	.	.	.	.	.	.	.
CP109951.1	25.3289	-48.4315	1	5	n/a	751	.	.	.	.	.	.	.	.	.	.	.	.	.	.	.	.	.	.	.	.	.	.	.	.	.	.	.	.	.	.	.	.	.	.	.	.	.	.	.	.	.	.	.
CP109771.1	24.4442	-47.4434	0.547432	5	n/a	5	.	.	.	.	.	.	.	.	.	.	.	.	.	.	.	.	.	.	.	.	.	.	.	.	.	.	.	.	.	.	.	.	.	.	.	.	.	.	.	.	.	.	.
CP107387.1	25.3169	-48.472	1	5	n/a	11	.	.	.	.	.	.	.	.	.	.	.	.	.	.	.	.	.	.	.	.	.	.	.	.	.	.	.	.	.	.	.	.	.	.	.	.	.	.	.	.	.	.	.
CP107376.1	25.3169	-48.472	1	5	n/a	11	.	.	.	.	.	.	.	.	.	.	.	.	.	.	.	.	.	.	.	.	.	.	.	.	.	.	.	.	.	.	.	.	.	.	.	.	.	.	.	.	.	.	.
CP107349.1	25.3021	-48.4325	1	5	n/a	11	.	.	.	.	.	.	.	.	.	.	.	.	.	.	.	.	.	.	.	.	.	.	.	.	.	.	.	.	.	.	.	.	.	.	.	.	.	.	.	.	.	.	.
CP107338.1	25.3021	-48.4325	1	5	n/a	11	.	.	.	.	.	.	.	.	.	.	.	.	.	.	.	.	.	.	.	.	.	.	.	.	.	.	.	.	.	.	.	.	.	.	.	.	.	.	.	.	.	.	.
CP107331.1	25.3262	-48.4363	1	5	n/a	11	.	.	.	.	.	.	.	.	.	.	.	.	.	.	.	.	.	.	.	.	.	.	.	.	.	.	.	.	.	.	.	.	.	.	.	.	.	.	.	.	.	.	.
CP107324.1	25.3639	-48.494	1	5	n/a	11	.	.	.	.	.	.	.	.	.	.	.	.	.	.	.	.	.	.	.	.	.	.	.	.	.	.	.	.	.	.	.	.	.	.	.	.	.	.	.	.	.	.	.
CP107316.1	25.2743	-48.3463	1	5	n/a	11	.	.	.	.	.	.	.	.	.	.	.	.	.	.	.	.	.	.	.	.	.	.	.	.	.	.	.	.	.	.	.	.	.	.	.	.	.	.	.	.	.	.	.
CP107228.1	25.2874	-48.9907	0.856802	5	n/a	1469	.	.	.	.	.	.	.	.	.	.	.	.	OXA-10-like	.	.	.	.	.	.	.	.	.	.	.	.	.	.	.	.	.	.	.	.	.	.	.	.	.	.	.	.	.	.
CP107046.1	23.5187	-48.1815	0.457613	5	n/a	2294	.	.	.	.	.	CTX-M-1-like	.	.	.	.	.	.	.	.	.	.	.	.	blaCTX-M-15	.	.	.	.	.	.	.	.	.	.	.	.	.	.	.	.	.	.	.	.	.	.	.	.
CP106763.1	25.3373	-48.3615	1	5	n/a	11	.	.	.	.	.	.	.	.	.	.	.	.	.	.	.	.	.	.	.	.	.	.	.	.	.	.	.	.	.	.	.	.	.	.	.	.	.	.	.	.	.	.	.
CP104314.1	25.8469	-48.6297	1	5	n/a	751	.	.	.	.	.	.	.	.	.	.	.	.	.	.	.	.	.	.	.	.	.	.	.	.	.	.	.	.	.	.	.	.	.	.	.	.	.	.	.	.	.	.	.
CP103318.1	25.9157	-48.2763	1	5	n/a	11	.	.	.	.	.	.	.	.	.	.	.	.	.	.	.	.	.	.	.	.	.	.	.	.	.	.	.	.	.	.	.	.	.	.	.	.	.	.	.	.	.	.	.
CP102990.1	23.551	-48.0324	0.46473	5	n/a	147	.	.	.	.	.	CTX-M-1-like	.	.	.	.	.	.	.	.	.	.	.	.	.	.	.	.	.	.	.	.	.	.	.	.	.	.	.	.	.	.	.	.	.	.	.	.	.
CP102839.1	25.3215	-48.3707	1	5	n/a	751	.	.	.	.	.	.	.	.	.	.	.	.	.	.	.	.	.	.	.	.	.	.	.	.	.	.	.	.	.	.	.	.	.	.	.	.	.	.	.	.	.	.	.
CP102394.1	25.3068	-48.4374	1	5	n/a	11	.	.	.	.	.	.	.	.	.	.	.	.	.	.	.	.	.	.	.	.	.	.	.	.	.	.	.	.	.	.	.	.	.	.	.	.	.	.	.	.	.	.	.
CP102194.1	25.9492	-48.4396	1	5	n/a	11	.	.	.	.	.	.	.	.	.	.	.	.	.	.	.	.	.	.	.	.	.	.	.	.	.	.	.	.	.	.	.	.	.	.	.	.	.	.	.	.	.	.	.
CP102188.1	26.3598	-47.0873	0.534059	5	n/a	11	.	.	.	.	.	.	.	.	.	.	KPC-like	.	.	.	.	.	.	SHV-like	.	.	.	blaKPC-2	.	.	.	.	.	.	.	.	.	.	.	.	.	.	.	blaSHV-12	.	.	.	.	.
CP101788.1	25.3061	-48.4388	1	5	n/a	11	.	.	.	.	.	.	.	.	.	.	.	.	.	.	.	.	.	.	.	.	.	.	.	.	.	.	.	.	.	.	.	.	.	.	.	.	.	.	.	.	.	.	.
CP101783.1	25.3061	-48.4388	1	5	n/a	11	.	.	.	.	.	.	.	.	.	.	.	.	.	.	.	.	.	.	.	.	.	.	.	.	.	.	.	.	.	.	.	.	.	.	.	.	.	.	.	.	.	.	.
CP101772.1	25.3061	-48.4388	1	5	n/a	11	.	.	.	.	.	.	.	.	.	.	.	.	.	.	.	.	.	.	.	.	.	.	.	.	.	.	.	.	.	.	.	.	.	.	.	.	.	.	.	.	.	.	.
CP101767.1	25.3389	-48.3797	1	5	n/a	11	.	.	.	.	.	.	.	.	.	.	.	.	.	.	.	.	.	.	.	.	.	.	.	.	.	.	.	.	.	.	.	.	.	.	.	.	.	.	.	.	.	.	.
CP100113.1	25.9369	-48.2937	1	5	n/a	15	.	.	.	.	.	.	.	.	.	.	.	.	.	.	.	.	.	.	.	.	.	.	.	.	.	.	.	.	.	.	.	.	.	.	.	.	.	.	.	.	.	.	.
CP100109.1	25.9444	-48.0335	1	5	n/a	15	.	.	.	.	.	.	.	.	.	.	.	.	.	.	.	.	.	.	.	.	.	.	.	.	.	.	.	.	.	.	.	.	.	.	.	.	.	.	.	.	.	.	.
CP100101.1	25.4087	-47.7218	0.990548	5	n/a	15	.	.	.	.	.	.	.	.	.	.	.	.	.	.	.	.	.	.	.	.	.	.	.	.	.	.	.	.	.	.	.	.	.	.	.	.	.	.	.	.	.	.	.
CP100097.1	25.9309	-48.2797	1	5	n/a	15	.	.	.	.	.	.	.	.	.	.	.	.	.	.	.	.	.	.	.	.	.	.	.	.	.	.	.	.	.	.	.	.	.	.	.	.	.	.	.	.	.	.	.
CP100090.1	25.353	-47.6938	0.957779	5	n/a	15	.	.	.	.	.	.	.	.	.	.	.	.	.	.	.	.	.	.	.	.	.	.	.	.	.	.	.	.	.	.	.	.	.	.	.	.	.	.	.	.	.	.	.
CP100074.1	25.9521	-47.8755	1	5	n/a	15	.	.	.	.	.	.	.	.	.	.	.	.	.	.	.	.	.	.	.	.	.	.	.	.	.	.	.	.	.	.	.	.	.	.	.	.	.	.	.	.	.	.	.
CP099416.1	25.9384	-48.2868	1	5	n/a	11	.	.	.	.	.	.	.	.	.	.	.	.	.	.	.	.	.	.	.	.	.	.	.	.	.	.	.	.	.	.	.	.	.	.	.	.	.	.	.	.	.	.	.
CP095266.1	25.3395	-48.3734	1	5	n/a	11	.	.	.	.	.	.	.	.	.	.	.	.	.	.	.	.	.	.	.	.	.	.	.	.	.	.	.	.	.	.	.	.	.	.	.	.	.	.	.	.	.	.	.
CP095249.1	25.9344	-48.5243	1	5	n/a	11	.	.	.	.	.	.	.	.	.	.	.	.	.	.	.	.	.	.	.	.	.	.	.	.	.	.	.	.	.	.	.	.	.	.	.	.	.	.	.	.	.	.	.
CP095243.1	25.9369	-48.2937	1	5	n/a	11	.	.	.	.	.	.	.	.	.	.	.	.	.	.	.	.	.	.	.	.	.	.	.	.	.	.	.	.	.	.	.	.	.	.	.	.	.	.	.	.	.	.	.
CP092796.1	25.5235	-47.7252	1	5	n/a	11	.	.	.	.	.	.	.	.	.	.	.	.	.	.	.	.	.	.	.	.	.	.	.	.	.	.	.	.	.	.	.	.	.	.	.	.	.	.	.	.	.	.	.
CP092789.1	25.371	-47.7305	1	5	n/a	11	.	.	.	.	.	.	.	.	.	.	.	.	.	.	.	.	.	.	.	.	.	.	.	.	.	.	.	.	.	.	.	.	.	.	.	.	.	.	.	.	.	.	.
CP091071.1	25.9575	-48.0649	1	5	n/a	11	.	.	.	.	.	.	.	.	.	.	.	.	.	.	.	.	.	.	.	.	.	.	.	.	.	.	.	.	.	.	.	.	.	.	.	.	.	.	.	.	.	.	.
CP090933.1	23.3189	-49.3519	1	5	n/a	340	.	.	.	.	.	.	.	.	.	.	.	.	.	.	.	.	.	.	.	.	.	.	.	.	.	.	.	.	.	.	.	.	.	.	.	.	.	.	.	.	.	.	.
CP090465.1	24.9448	-48.1202	0.997206	5	n/a	11	.	.	.	.	.	.	.	.	.	.	.	.	.	.	.	.	.	.	.	.	.	.	.	.	.	.	.	.	.	.	.	.	.	.	.	.	.	.	.	.	.	.	.
CP090435.1	25.8931	-47.8013	1	5	n/a	11	.	.	.	.	.	.	.	.	.	.	.	.	.	.	.	.	.	.	.	.	.	.	.	.	.	.	.	.	.	.	.	.	.	.	.	.	.	.	.	.	.	.	.
CP090346.1	25.8216	-48.679	1	5	n/a	11	.	.	.	.	.	.	.	.	.	.	.	.	.	.	.	.	.	.	.	.	.	.	.	.	.	.	.	.	.	.	.	.	.	.	.	.	.	.	.	.	.	.	.
CP090127.1	23.4364	-48.8202	0.468007	5	n/a	15	.	.	.	.	.	.	.	.	.	.	KPC-like	.	.	.	.	.	.	.	.	.	.	blaKPC-2	.	.	.	.	.	.	.	.	.	.	.	.	.	.	.	.	IncX6/100/100/1029	.	.	.	.
CP089429.1	23.4129	-49.3336	0.39421	5	n/a	340	.	.	.	.	.	.	.	.	.	.	.	.	.	.	.	.	.	.	.	.	.	.	.	.	.	.	.	.	.	.	.	.	.	.	.	.	.	.	.	.	.	.	.
CP088994.1	24.9363	-48.1384	0.996408	5	n/a	11	.	.	.	.	.	.	.	.	.	.	.	.	.	.	.	.	.	.	.	.	.	.	.	.	.	.	.	.	.	.	.	.	.	.	.	.	.	.	.	.	.	.	.
CP088128.1	23.5132	-48.1784	0.455879	5	n/a	11	.	.	.	.	.	CTX-M-1-like	.	.	.	.	.	.	.	.	.	.	.	.	blaCTX-M-15	.	.	.	.	.	.	.	.	.	.	.	.	.	.	.	.	.	.	.	.	.	.	.	.
CP088122.1	23.5133	-48.1775	0.455902	5	n/a	11	.	.	.	.	.	CTX-M-1-like	.	.	.	.	.	.	.	.	.	.	.	.	blaCTX-M-15	.	.	.	.	.	.	.	.	.	.	.	.	.	.	.	.	.	.	.	.	.	.	.	.
CP087642.1	25.9439	-48.054	1	5	n/a	11	.	.	.	.	.	.	.	.	.	.	.	.	.	.	.	.	.	.	.	.	.	.	.	.	.	.	.	.	.	.	.	.	.	.	.	.	.	.	.	.	.	.	.
CP087626.1	26.4082	-48.8379	0.612613	5	n/a	11	.	.	.	.	.	.	.	.	.	.	.	.	.	.	.	.	.	.	.	.	.	.	.	.	.	.	.	.	.	.	.	.	.	.	.	.	.	.	ColRNAI/100/98.46/130	.	.	.	.
CP087154.1	25.9137	-48.2915	1	5	n/a	11	.	.	.	.	.	.	.	.	.	.	.	.	.	.	.	.	.	.	.	.	.	.	.	.	.	.	.	.	.	.	.	.	.	.	.	.	.	.	.	.	.	.	.
CP087149.1	25.9239	-48.3008	1	5	n/a	11	.	.	.	.	.	.	.	.	.	.	.	.	.	.	.	.	.	.	.	.	.	.	.	.	.	.	.	.	.	.	.	.	.	.	.	.	.	.	.	.	.	.	.
CP087145.1	26.4264	-48.2482	0.614367	5	n/a	11	.	.	.	.	.	.	.	.	.	.	.	.	.	.	.	.	.	.	.	.	.	.	.	.	.	.	.	.	.	.	.	.	.	.	.	.	.	.	ColRNAI/100/98.46/130	.	.	.	.
CP085892.1	25.8482	-48.6355	1	5	n/a	11	.	.	.	.	.	.	.	.	.	.	.	.	.	.	.	.	.	.	.	.	.	.	.	.	.	.	.	.	.	.	.	.	.	.	.	.	.	.	.	.	.	.	.
CP084708.1	25.5862	-48.7383	1	5	n/a	11	.	.	.	.	.	.	.	.	.	.	.	.	.	.	.	.	.	.	.	.	.	.	.	.	.	.	.	.	.	.	.	.	.	.	.	.	.	.	.	.	.	.	.
CP082768.1	25.4557	-47.717	0.972594	5	n/a	11	.	.	.	.	.	.	.	.	.	.	.	.	.	.	.	.	.	.	.	.	.	.	.	.	.	.	.	.	.	.	.	.	.	.	.	.	.	.	.	.	.	.	.
CP082762.1	25.929	-48.2283	1	5	n/a	11	.	.	.	.	.	.	.	.	.	.	.	.	.	.	.	.	.	.	.	.	.	.	.	.	.	.	.	.	.	.	.	.	.	.	.	.	.	.	.	.	.	.	.
CP082756.1	25.879	-47.9201	1	5	n/a	11	.	.	.	.	.	.	.	.	.	.	.	.	.	.	.	.	.	.	.	.	.	.	.	.	.	.	.	.	.	.	.	.	.	.	.	.	.	.	.	.	.	.	.
CP082210.1	23.9351	-49.1894	0.509772	5	n/a	268	.	.	.	.	.	.	.	.	.	.	.	.	.	.	.	.	.	.	.	.	.	.	.	.	.	.	.	.	.	.	.	.	.	.	.	.	.	.	.	.	.	.	.
CP081822.1	25.2689	-48.9322	0.853963	5	n/a	11	.	.	.	.	.	.	.	.	.	.	.	.	.	.	.	.	.	.	.	.	.	.	.	.	.	.	.	.	.	.	.	.	.	.	.	.	.	.	.	.	.	.	.
CP080312.1	25.9633	-48.7972	1	5	n/a	11	.	.	.	.	.	.	.	.	.	.	.	.	.	.	.	.	.	.	.	.	.	.	.	.	.	.	.	.	.	.	.	.	.	.	.	.	.	.	.	.	.	.	.
CP080306.1	26.4959	-48.3935	0.634799	5	n/a	11	.	.	.	.	.	.	.	.	.	.	.	.	.	.	.	.	.	.	.	.	.	.	.	.	.	.	.	.	.	.	.	.	.	.	.	.	.	.	ColRNAI/99.23/95.45/130	.	.	.	.
CP080300.1	25.9312	-48.783	0.901836	5	n/a	11	.	.	.	.	.	.	.	.	.	.	.	.	.	.	.	.	.	.	.	.	.	.	.	.	.	.	.	.	.	.	.	.	.	.	.	.	.	.	.	.	.	.	.
CP078125.1	25.3519	-49.5583	0.57453	5	n/a	11	.	.	.	.	.	.	.	.	.	.	.	NDM-like	.	.	.	.	.	.	.	.	.	.	.	.	.	.	blaNDM-1	.	.	.	.	.	.	.	.	.	.	.	.	.	.	.	.
CP077776.1	25.3507	-47.7054	0.974676	5	n/a	11	.	.	.	.	.	.	.	.	.	.	.	.	.	.	.	.	.	.	.	.	.	.	.	.	.	.	.	.	.	.	.	.	.	.	.	.	.	.	.	.	.	.	.
CP076674.1	25.3393	-47.7091	0.980589	5	n/a	-	.	.	.	.	.	.	.	.	.	.	.	.	.	.	.	.	.	.	.	.	.	.	.	.	.	.	.	.	.	.	.	.	.	.	.	.	.	.	.	.	.	.	.
CP071824.1	23.6207	-48.7037	0.49078	5	n/a	17	.	.	.	.	.	.	.	.	.	.	.	.	.	.	.	.	.	.	.	.	.	.	.	.	.	.	.	.	.	.	.	.	.	.	.	.	.	.	.	.	.	.	.
CP070178.1	24.3709	-49.4152	0.479118	5	n/a	628	.	.	.	.	.	.	.	.	.	.	.	.	.	.	.	.	.	.	.	.	.	.	.	.	.	.	.	.	.	.	.	.	.	.	.	.	.	.	.	.	.	.	.
CP069176.1	25.8917	-47.9189	1	5	n/a	11	.	.	.	.	.	.	.	.	.	.	.	.	.	.	.	.	.	.	.	.	.	.	.	.	.	.	.	.	.	.	.	.	.	.	.	.	.	.	.	.	.	.	.
CP067934.1	24.0948	-50.016	0.342515	5	n/a	244	.	.	.	.	.	.	.	.	.	.	.	.	.	.	.	.	.	.	.	.	.	.	.	.	.	.	.	.	.	.	.	.	.	.	.	.	.	.	.	.	.	.	.
CP066907.1	25.4339	-48.9388	0.998707	5	n/a	11	.	.	.	.	.	.	.	.	.	.	.	.	.	.	.	.	.	.	.	.	.	.	.	.	.	.	.	.	.	.	.	.	.	.	.	.	.	.	.	.	.	.	.
CP066257.1	25.4143	-47.7149	0.979404	5	n/a	11	.	.	.	.	.	.	.	.	.	.	.	.	.	.	.	.	.	.	.	.	.	.	.	.	.	.	.	.	.	.	.	.	.	.	.	.	.	.	.	.	.	.	.
CP066252.1	26.4222	-48.231	0.607679	5	n/a	11	.	.	.	.	.	.	.	.	.	.	.	.	.	.	.	.	.	.	.	.	.	.	.	.	.	.	.	.	.	.	.	.	.	.	.	.	.	.	ColRNAI/99.23/96.21/130	.	.	.	.
CP066154.1	25.8937	-48.2495	1	5	n/a	11	.	.	.	.	.	.	.	.	.	.	.	.	.	.	.	.	.	.	.	.	.	.	.	.	.	.	.	.	.	.	.	.	.	.	.	.	.	.	.	.	.	.	.
CP065556.1	25.8332	-49.172	0.688861	5	n/a	11	.	.	.	.	.	.	.	.	.	.	.	.	.	.	.	.	.	.	.	.	.	.	.	.	.	.	.	.	.	.	.	.	.	.	.	.	.	.	.	.	.	.	.
CP064261.1	24.3841	-47.9999	0.636589	5	n/a	11	.	.	.	.	.	.	.	.	.	.	KPC-like	.	.	.	.	.	.	.	.	.	.	blaKPC-2	.	.	.	.	.	.	.	.	.	.	.	.	.	.	.	.	.	.	.	.	.
CP064244.1	25.9781	-48.2411	0.995196	5	n/a	11	.	.	.	.	.	.	.	.	.	.	.	.	.	.	.	.	.	.	.	.	.	.	.	.	.	.	.	.	.	.	.	.	.	.	.	.	.	.	.	.	.	.	.
CP064238.1	25.4352	-47.7196	0.982288	5	n/a	11	.	.	.	.	.	.	.	.	.	.	.	.	.	.	.	.	.	.	.	.	.	.	.	.	.	.	.	.	.	.	.	.	.	.	.	.	.	.	.	.	.	.	.
CP064225.1	26.3163	-47.0714	0.533022	5	n/a	11	.	.	.	.	.	.	.	.	.	.	KPC-like	.	.	.	.	.	.	.	.	.	.	blaKPC-2	.	.	.	.	.	.	.	.	.	.	.	.	.	.	.	.	.	.	.	.	.
CP064219.1	26.3615	-47.0891	0.534579	5	n/a	11	.	.	.	.	.	.	.	.	.	.	KPC-like	.	.	.	.	.	.	SHV-like	.	.	.	blaKPC-2	.	.	.	.	.	.	.	.	.	.	.	.	.	.	.	blaSHV-12	.	.	.	.	.
CP064215.1	24.3835	-47.9978	0.635788	5	n/a	11	.	.	.	.	.	.	.	.	.	.	KPC-like	.	.	.	.	.	.	.	.	.	.	blaKPC-2	.	.	.	.	.	.	.	.	.	.	.	.	.	.	.	.	.	.	.	.	.
CP064130.1	24.5153	-48.8334	0.705962	5	n/a	-	.	.	.	.	.	.	.	.	.	.	.	.	.	.	.	.	.	.	.	.	.	.	.	.	.	.	.	.	.	.	.	.	.	.	.	.	.	.	.	.	.	.	.
CP063836.1	25.9227	-48.2866	1	5	n/a	11	.	.	.	.	.	.	.	.	.	.	.	.	.	.	.	.	.	.	.	.	.	.	.	.	.	.	.	.	.	.	.	.	.	.	.	.	.	.	.	.	.	.	.
CP063763.1	23.9865	-49.178	0.521235	5	n/a	11	.	.	.	.	.	.	.	.	.	.	.	.	.	.	.	.	.	.	.	.	.	.	.	.	.	.	.	.	.	.	.	.	.	.	.	.	.	.	.	.	.	.	.
CP060745.1	24.9404	-48.7887	0.743661	5	n/a	37	.	.	.	.	.	.	.	.	.	.	.	.	.	.	.	.	.	.	.	.	.	.	.	.	.	.	.	.	.	.	.	.	.	.	.	.	.	.	.	.	.	.	.
CP055297.1	25.8928	-47.9383	1	5	n/a	11	.	.	.	.	.	.	.	.	.	.	.	.	.	.	.	.	.	.	.	.	.	.	.	.	.	.	.	.	.	.	.	.	.	.	.	.	.	.	.	.	.	.	.
CP054783.1	25.9134	-47.8011	1	5	n/a	11	.	.	.	.	.	.	.	.	.	.	.	.	.	.	.	.	.	.	.	.	.	.	.	.	.	.	.	.	.	.	.	.	.	.	.	.	.	.	.	.	.	.	.
CP054777.1	25.972	-47.9384	1	5	n/a	11	.	.	.	.	.	.	.	.	.	.	.	.	.	.	.	.	.	.	.	.	.	.	.	.	.	.	.	.	.	.	.	.	.	.	.	.	.	.	.	.	.	.	.
CP054771.1	25.9134	-47.8011	1	5	n/a	11	.	.	.	.	.	.	.	.	.	.	.	.	.	.	.	.	.	.	.	.	.	.	.	.	.	.	.	.	.	.	.	.	.	.	.	.	.	.	.	.	.	.	.
CP054765.1	25.4179	-47.7148	0.978547	5	n/a	11	.	.	.	.	.	.	.	.	.	.	.	.	.	.	.	.	.	.	.	.	.	.	.	.	.	.	.	.	.	.	.	.	.	.	.	.	.	.	.	.	.	.	.
CP054759.1	25.9134	-47.8011	1	5	n/a	11	.	.	.	.	.	.	.	.	.	.	.	.	.	.	.	.	.	.	.	.	.	.	.	.	.	.	.	.	.	.	.	.	.	.	.	.	.	.	.	.	.	.	.
CP054753.1	25.9134	-47.8011	1	5	n/a	11	.	.	.	.	.	.	.	.	.	.	.	.	.	.	.	.	.	.	.	.	.	.	.	.	.	.	.	.	.	.	.	.	.	.	.	.	.	.	.	.	.	.	.
CP054747.1	25.4559	-47.7157	0.970712	5	n/a	11	.	.	.	.	.	.	.	.	.	.	.	.	.	.	.	.	.	.	.	.	.	.	.	.	.	.	.	.	.	.	.	.	.	.	.	.	.	.	.	.	.	.	.
CP054741.1	25.972	-47.9384	1	5	n/a	11	.	.	.	.	.	.	.	.	.	.	.	.	.	.	.	.	.	.	.	.	.	.	.	.	.	.	.	.	.	.	.	.	.	.	.	.	.	.	.	.	.	.	.
CP054735.1	25.9482	-48.1293	0.989736	5	n/a	11	.	.	.	.	.	.	.	.	.	.	.	.	.	.	.	.	.	.	.	.	.	.	.	.	.	.	.	.	.	.	.	.	.	.	.	.	.	.	.	.	.	.	.
CP054729.1	25.9134	-47.8011	1	5	n/a	11	.	.	.	.	.	.	.	.	.	.	.	.	.	.	.	.	.	.	.	.	.	.	.	.	.	.	.	.	.	.	.	.	.	.	.	.	.	.	.	.	.	.	.
CP054723.1	25.8551	-47.8831	0.957216	5	n/a	11	.	.	.	.	.	.	.	.	.	.	.	.	.	.	.	.	.	.	.	.	.	.	.	.	.	.	.	.	.	.	.	.	.	.	.	.	.	.	.	.	.	.	.
CP050288.1	24.3735	-47.798	0.619452	5	n/a	-	.	.	.	.	.	.	.	.	.	.	KPC-like	.	.	.	.	.	.	.	.	.	.	blaKPC-2	.	.	.	.	.	.	.	.	.	.	.	.	.	.	.	.	.	.	.	.	.
CP050283.1	25.9463	-47.888	1	5	n/a	11	.	.	.	.	.	.	.	.	.	.	.	.	.	.	.	.	.	.	.	.	.	.	.	.	.	.	.	.	.	.	.	.	.	.	.	.	.	.	.	.	.	.	.
CP050279.1	24.3785	-47.8384	0.622167	5	n/a	-	.	.	.	.	.	.	.	.	.	.	KPC-like	.	.	.	.	.	.	.	.	.	.	blaKPC-2	.	.	.	.	.	.	.	.	.	.	.	.	.	.	.	.	.	.	.	.	.
CP047195.1	25.9281	-48.5867	1	5	n/a	11	.	.	.	.	.	.	.	.	.	.	.	.	.	.	.	.	.	.	.	.	.	.	.	.	.	.	.	.	.	.	.	.	.	.	.	.	.	.	.	.	.	.	.
CP041376.1	25.8711	-47.9237	1	5	n/a	11	.	.	.	.	.	.	.	.	.	.	.	.	.	.	.	.	.	.	.	.	.	.	.	.	.	.	.	.	.	.	.	.	.	.	.	.	.	.	.	.	.	.	.
CP041095.1	24.0073	-49.2852	0.486795	5	n/a	3541	.	.	.	.	.	.	.	.	.	.	.	.	.	.	.	.	.	.	.	.	.	.	.	.	.	.	.	.	.	.	.	.	.	.	.	.	.	.	.	.	.	.	.
CP035213.1	24.3189	-49.2746	0.508495	5	n/a	873	.	.	.	.	.	.	.	.	.	.	.	.	.	.	.	.	.	.	.	.	.	.	.	.	.	.	.	.	.	.	.	.	.	.	.	.	.	.	.	.	.	.	.
CP035205.1	23.9161	-49.3145	0.465119	5	n/a	39	.	.	.	.	.	.	.	.	.	.	.	.	.	.	.	.	.	.	.	.	.	.	.	.	.	.	.	.	.	.	.	.	.	.	.	.	.	.	.	.	.	.	.
CP034126.1	25.5102	-48.6846	1	5	n/a	11	.	.	.	.	.	.	.	.	.	.	.	.	.	.	.	.	.	.	.	.	.	.	.	.	.	.	.	.	.	.	.	.	.	.	.	.	.	.	.	.	.	.	.
CP033957.1	25.8192	-48.6906	1	5	n/a	11	.	.	.	.	.	.	.	.	.	.	.	.	.	.	.	.	.	.	.	.	.	.	.	.	.	.	.	.	.	.	.	.	.	.	.	.	.	.	.	.	.	.	.
CP033775.1	25.026	-49.6629	0.513937	5	n/a	25	.	.	.	.	.	.	.	.	.	.	.	.	.	.	.	.	.	.	.	.	.	.	.	.	.	.	.	.	.	.	.	.	.	.	.	.	.	.	.	.	.	.	.
CP032243.1	25.3632	-47.6991	0.96451	5	n/a	11	.	.	.	.	.	.	.	.	.	.	.	.	.	.	.	.	.	.	.	.	.	.	.	.	.	.	.	.	.	.	.	.	.	.	.	.	.	.	.	.	.	.	.
CP031937.1	25.9215	-48.2867	1	5	n/a	11	.	.	.	.	.	.	.	.	.	.	.	.	.	.	.	.	.	.	.	.	.	.	.	.	.	.	.	.	.	.	.	.	.	.	.	.	.	.	.	.	.	.	.
CP030309.1	24.3208	-49.1847	0.546058	5	n/a	290	.	.	.	.	.	.	.	.	.	.	.	.	.	.	.	.	.	.	.	.	.	.	.	.	.	.	.	.	.	.	.	.	.	.	.	.	.	.	.	.	.	.	.
CP029382.1	25.4289	-48.9364	0.995073	5	n/a	11	.	.	.	.	.	.	.	.	.	.	.	.	.	.	.	.	.	.	.	.	.	.	.	.	.	.	.	.	.	.	.	.	.	.	.	.	.	.	.	.	.	.	.
CP028480.1	25.8094	-49.1057	0.736427	5	n/a	3582	.	.	.	.	.	.	.	.	.	.	.	.	.	.	.	.	.	.	.	.	.	.	.	.	.	.	.	.	.	.	.	.	.	.	.	.	.	.	.	.	.	.	.
CP028178.1	22.8546	-47.8197	0.308179	5	n/a	15	.	.	.	.	.	CTX-M-1-like	.	.	.	.	.	NDM-like	.	.	.	.	OXA-9-like	.	blaCTX-M-15	.	.	.	.	.	.	.	blaNDM-1	.	.	.	.	blaOXA-9	.	.	.	.	.	.	IncFII(pKPX1)/99.65/93.26/577	.	.	.	.
CP024461.1	23.6598	-48.2682	0.505807	5	n/a	45	.	.	.	.	.	CTX-M-1-like	.	.	.	.	.	.	.	.	.	.	.	.	.	.	.	.	.	.	.	.	.	.	.	.	.	.	.	.	.	.	.	.	.	.	.	.	.
CP018341.1	24.9482	-48.8044	0.758921	5	n/a	23	.	.	.	.	.	.	.	.	.	.	.	.	.	.	.	.	.	.	.	.	.	.	.	.	.	.	.	.	.	.	.	.	.	.	.	.	.	.	.	.	.	.	.
517485_p1	20.4661	28.8821	0.350984	7	Jordan	1399	iucA	.	.	rmpA2	.	.	.	.	.	.	.	.	.	.	.	.	.	.	.	.	.	.	.	.	.	.	.	.	.	.	.	.	.	.	.	.	.	.	IncFIB(K)/100/91.07/560	.	.	.	.
515432_p1	20.5448	28.9514	1	7	Jordan	1399	iucA	.	.	rmpA2	.	.	.	.	.	.	.	.	.	.	.	.	.	.	.	.	.	.	.	.	.	.	.	.	.	.	.	.	.	.	.	.	.	.	IncFIB(K)/100/91.07/560	.	.	.	.
OW970222.1	17.7141	26.0914	1	7	n/a	1961	.	.	.	.	.	.	.	.	.	.	.	.	.	.	.	.	.	.	.	.	.	.	.	.	.	.	.	.	.	.	.	.	.	.	.	.	.	.	IncFIB(K)/100/91.07/560	.	.	.	.
OW970024.1	17.835	26.1378	0.98314	7	n/a	147	.	.	.	.	.	.	.	.	.	.	.	.	.	.	.	.	.	.	.	.	.	.	.	.	.	.	.	.	.	.	.	.	.	.	.	.	.	.	IncFIB(K)/100/91.07/560	.	.	.	.
OW969859.1	17.8182	26.016	1	7	n/a	1961	.	.	.	.	.	.	.	.	.	.	.	.	.	.	.	.	.	.	.	.	.	.	.	.	.	.	.	.	.	.	.	.	.	.	.	.	.	.	IncFIB(K)/100/91.07/560	.	.	.	.
OW969798.1	17.9334	26.0752	1	7	n/a	147	.	.	.	.	.	.	.	.	.	.	.	.	.	.	.	.	.	.	.	.	.	.	.	.	.	.	.	.	.	.	.	.	.	.	.	.	.	.	IncFIB(K)/100/91.07/560	.	.	.	.
OW968455.1	17.8183	26.0161	1	7	n/a	1961	.	.	.	.	.	.	.	.	.	.	.	.	.	.	.	.	.	.	.	.	.	.	.	.	.	.	.	.	.	.	.	.	.	.	.	.	.	.	IncFIB(K)/100/91.07/560	.	.	.	.
OW968246.1	17.712	26.0943	1	7	n/a	1961	.	.	.	.	.	.	.	.	.	.	.	.	.	.	.	.	.	.	.	.	.	.	.	.	.	.	.	.	.	.	.	.	.	.	.	.	.	.	IncFIB(K)/100/91.07/560	.	.	.	.
OW967382.1	13.2792	30.3764	0.373464	7	n/a	405	.	.	.	.	.	.	.	.	.	.	.	.	.	.	.	.	.	.	.	.	.	.	.	.	.	.	.	.	.	.	.	.	.	.	.	.	.	.	IncFIB(K)/100/91.43/560	.	.	.	.
OW966981.1	14.4495	30.9768	0.431929	7	n/a	1189	.	.	.	.	.	.	.	.	.	.	.	.	.	.	.	.	.	.	.	.	.	.	.	.	.	.	.	.	.	.	.	.	.	.	.	.	.	.	IncFIB(K)/100/91.25/560	.	.	.	.
OW849538.1	17.7131	26.0872	1	7	n/a	1961	.	.	.	.	.	.	.	.	.	.	.	.	.	.	.	.	.	.	.	.	.	.	.	.	.	.	.	.	.	.	.	.	.	.	.	.	.	.	IncFIB(K)/100/91.07/560	.	.	.	.
OW849440.1	17.9334	26.0752	1	7	n/a	147	.	.	.	.	.	.	.	.	.	.	.	.	.	.	.	.	.	.	.	.	.	.	.	.	.	.	.	.	.	.	.	.	.	.	.	.	.	.	IncFIB(K)/100/91.07/560	.	.	.	.
OW849409.1	17.8315	26.1402	0.982111	7	n/a	147	.	.	.	.	.	.	.	.	.	.	.	.	.	.	.	.	.	.	.	.	.	.	.	.	.	.	.	.	.	.	.	.	.	.	.	.	.	.	IncFIB(K)/100/91.07/560	.	.	.	.
OW849345.1	17.392	24.6313	0.630763	7	n/a	147	.	.	.	.	.	.	.	.	.	.	.	.	.	.	.	.	.	SHV-like	.	.	.	.	.	.	.	.	.	.	.	.	.	.	.	.	.	.	.	blaSHV-12	IncFIA(HI1)/99.74/98.45/388	IncR/100/100/251	IncFIB(K)/100/91.07/560	.	.
OW849244.1	17.8302	26.1556	0.990374	7	n/a	147	.	.	.	.	.	.	.	.	.	.	.	.	.	.	.	.	.	.	.	.	.	.	.	.	.	.	.	.	.	.	.	.	.	.	.	.	.	.	IncFIB(K)/100/91.07/560	.	.	.	.
OW849148.1	15.2472	25.7538	0.634214	7	n/a	273	.	.	.	.	.	.	.	.	.	.	.	.	.	.	.	.	.	.	.	.	.	.	.	.	.	.	.	.	.	.	.	.	.	.	.	.	.	.	IncHI1B/100/99.47/570	IncFIB(K)/100/91.25/560	.	.	.
OW849004.1	15.247	25.7554	0.634422	7	n/a	273	.	.	.	.	.	.	.	.	.	.	.	.	.	.	.	.	.	.	.	.	.	.	.	.	.	.	.	.	.	.	.	.	.	.	.	.	.	.	IncHI1B/100/99.47/570	IncFIB(K)/100/91.25/560	.	.	.
OW848997.1	17.7141	26.0935	1	7	n/a	1961	.	.	.	.	.	.	.	.	.	.	.	.	.	.	.	.	.	.	.	.	.	.	.	.	.	.	.	.	.	.	.	.	.	.	.	.	.	.	IncFIB(K)/100/91.07/560	.	.	.	.
OW848894.1	16.0201	29.3517	0.592874	7	n/a	219	.	.	.	.	.	.	.	.	.	.	.	.	.	.	.	.	.	.	.	.	.	.	.	.	.	.	.	.	.	.	.	.	.	.	.	.	.	.	IncFIB(K)/100/91.43/560	.	.	.	.
LR890752.1	18.5623	28.6206	0.573199	7	n/a	15	.	.	.	.	.	.	.	.	.	.	.	.	.	.	.	.	.	.	.	.	.	.	.	.	.	.	.	.	.	.	.	.	.	.	.	.	.	.	IncFIB(K)/100/91.25/560	.	.	.	.
LR890699.1	20.6467	27.2817	0.388285	7	n/a	641	.	.	.	.	.	.	.	.	.	.	.	.	.	.	.	.	.	.	.	.	.	.	.	.	.	.	.	.	.	.	.	.	.	.	.	.	.	.	IncFIA(HI1)/100/96.39/388	IncFIB(K)/100/91.07/560	.	.	.
LR890687.1	14.0231	31.6992	1	7	n/a	45	.	.	.	.	.	.	.	.	.	.	.	.	.	.	.	.	.	.	.	.	.	.	.	.	.	.	.	.	.	.	.	.	.	.	.	.	.	.	IncFIB(K)/100/91.43/560	.	.	.	.
LR890666.1	12.0018	31.599	0.318185	7	n/a	2998	.	.	.	.	.	.	.	.	.	.	.	.	.	.	.	.	.	.	.	.	.	.	.	.	.	.	.	.	.	.	.	.	.	.	.	.	.	.	IncHI1B/100/99.12/570	IncFIB(K)/100/91.07/560	.	.	.
LR890649.1	20.0947	27.8287	0.469991	7	n/a	20	.	.	.	.	.	.	.	.	.	.	.	.	.	.	.	.	.	.	.	.	.	.	.	.	.	.	.	.	.	.	.	.	.	.	.	.	.	.	IncFIB(K)/100/91.25/560	.	.	.	.
LR890628.1	12.0049	31.5629	0.318855	7	n/a	116	.	.	.	.	.	.	.	.	.	.	.	.	.	.	.	.	.	.	.	.	.	.	.	.	.	.	.	.	.	.	.	.	.	.	.	.	.	.	IncHI1B/100/99.82/570	IncFIB(K)/100/91.07/560	.	.	.
LR890625.1	12.0031	31.604	0.31793	7	n/a	3072	.	.	.	.	.	.	.	.	.	.	.	.	.	.	.	.	.	.	.	.	.	.	.	.	.	.	.	.	.	.	.	.	.	.	.	.	.	.	IncHI1B/100/99.12/570	IncFIB(K)/100/91.07/560	.	.	.
LR890475.1	13.1614	30.3762	0.369804	7	n/a	2513	.	.	.	.	.	.	.	.	.	.	.	.	.	.	.	.	.	.	.	.	.	.	.	.	.	.	.	.	.	.	.	.	.	.	.	.	.	.	IncFIB(K)/100/91.43/560	.	.	.	.
LR890459.1	15.0025	31.1564	0.471198	7	n/a	37	.	.	.	.	.	.	.	.	.	.	.	.	.	.	.	.	.	.	.	.	.	.	.	.	.	.	.	.	.	.	.	.	.	.	.	.	.	.	IncFIB(K)/100/91.07/560	.	.	.	.
LR890354.1	18.5591	28.6272	0.572975	7	n/a	15	.	.	.	.	.	.	.	.	.	.	.	.	.	.	.	.	.	.	.	.	.	.	.	.	.	.	.	.	.	.	.	.	.	.	.	.	.	.	IncFIB(K)/100/91.25/560	.	.	.	.
LR890321.1	11.9879	31.5231	0.321535	7	n/a	3061	.	.	.	.	.	.	.	.	.	.	.	.	.	.	.	.	.	.	.	.	.	.	.	.	.	.	.	.	.	.	.	.	.	.	.	.	.	.	IncHI1B/100/99.12/570	IncFIB(K)/100/91.07/560	.	.	.
LR890318.1	17.0345	26.6613	1	7	n/a	20	.	.	.	.	.	.	.	.	.	.	.	.	.	.	.	.	.	.	.	.	.	.	.	.	.	.	.	.	.	.	.	.	.	.	.	.	.	.	IncFIB(K)/100/91.07/560	.	.	.	.
LR890287.1	18.5959	28.4322	0.593057	7	n/a	661	.	.	.	.	.	.	.	.	.	.	.	.	.	.	.	.	.	.	.	.	.	.	.	.	.	.	.	.	.	.	.	.	.	.	.	.	.	.	IncFIB(K)/100/91.07/560	.	.	.	.
LR890236.1	19.6196	28.4148	0.50575	7	n/a	105	.	.	.	.	.	.	.	.	.	.	.	.	.	.	.	.	.	.	.	.	.	.	.	.	.	.	.	.	.	.	.	.	.	.	.	.	.	.	IncFIB(K)/100/91.43/560	.	.	.	.
LR890226.1	12.0404	31.5574	0.315622	7	n/a	3067	.	.	.	.	.	.	.	.	.	.	.	.	.	.	.	.	.	.	.	.	.	.	.	.	.	.	.	.	.	.	.	.	.	.	.	.	.	.	IncHI1B/100/99.12/570	IncFIB(K)/100/91.07/560	.	.	.
LR890218.1	20.0693	27.8582	0.473188	7	n/a	30	.	.	.	.	.	.	.	.	.	.	.	.	.	.	.	.	.	.	.	.	.	.	.	.	.	.	.	.	.	.	.	.	.	.	.	.	.	.	IncFIB(K)/100/91.25/560	.	.	.	.
LR890179.1	12.037	31.5448	0.316265	7	n/a	1449	.	.	.	.	.	.	.	.	.	.	.	.	.	.	.	.	.	.	.	.	.	.	.	.	.	.	.	.	.	.	.	.	.	.	.	.	.	.	IncHI1B/100/99.12/570	IncFIB(K)/100/91.07/560	.	.	.
LR134207.1	14.4479	30.9728	0.432195	7	n/a	3572	.	.	.	.	.	.	.	.	.	.	.	.	.	.	.	.	.	.	.	.	.	.	.	.	.	.	.	.	.	.	.	.	.	.	.	.	.	.	IncFIB(K)/100/91.25/560	.	.	.	.
CP120874.1	16.9709	26.476	1	7	n/a	-	.	.	.	.	.	CTX-M-1-like	.	.	.	.	.	.	.	.	.	.	.	.	.	.	.	.	.	.	.	.	.	.	.	.	.	.	.	.	.	.	.	.	IncFIB(K)/100/91.07/560	.	.	.	.
CP118902.1	16.7822	26.4588	1	7	n/a	76	.	.	.	.	.	.	.	.	.	.	.	.	.	.	.	.	.	.	.	.	.	.	.	.	.	.	.	.	.	.	.	.	.	.	.	.	.	.	IncFIB(K)/100/91.07/560	IncHI1B/100/100/570	.	.	.
CP117220.1	15.9825	29.3338	0.586185	7	n/a	219	.	.	.	.	.	.	.	.	.	.	.	.	.	.	.	.	.	.	.	.	.	.	.	.	.	.	.	.	.	.	.	.	.	.	.	.	.	.	IncFIB(K)/100/91.43/560	.	.	.	.
CP117218.1	15.9648	29.3238	0.583286	7	n/a	219	.	.	.	.	.	.	.	.	.	.	.	.	.	.	.	.	.	.	.	.	.	.	.	.	.	.	.	.	.	.	.	.	.	.	.	.	.	.	IncFIB(K)/100/91.43/560	.	.	.	.
CP113174.1	15.147	25.7611	0.613476	7	n/a	963	.	.	.	.	.	.	.	.	.	.	.	.	.	.	.	.	.	.	.	.	.	.	.	.	.	.	.	.	.	.	.	.	.	.	.	.	.	.	IncHI1B/100/100/570	IncFIB(K)/100/91.25/560	.	.	.
CP113166.1	15.1308	25.7682	0.607347	7	n/a	438	.	.	.	.	.	.	.	.	.	.	.	.	.	.	.	.	.	.	.	.	.	.	.	.	.	.	.	.	.	.	.	.	.	.	.	.	.	.	IncHI1B/100/100/570	IncFIB(K)/100/91.25/560	.	.	.
CP110767.1	18.5605	28.6272	0.572597	7	n/a	15	.	.	.	.	.	.	.	.	.	.	.	.	.	.	.	.	.	.	.	.	.	.	.	.	.	.	.	.	.	.	.	.	.	.	.	.	.	.	IncFIB(K)/100/91.25/560	.	.	.	.
CP110637.1	11.5881	32.6437	0.327268	7	n/a	412	.	iroB	rmpA	.	peg344	.	.	.	.	.	.	.	.	.	.	.	.	.	.	.	.	.	.	.	.	.	.	.	.	.	.	.	.	.	.	.	.	.	IncFIB(K)/100/91.25/560	.	.	.	.
CP110526.1	16.1879	32.2061	0.326401	7	n/a	-	.	.	.	.	.	.	.	.	.	.	.	.	.	.	.	.	.	.	.	.	.	.	.	.	.	.	.	.	.	.	.	.	.	.	.	.	.	.	IncHI1B/100/99.47/570	IncFIB(K)/100/91.07/560	.	.	.
CP110517.1	16.1874	32.2069	0.326338	7	n/a	-	.	.	.	.	.	.	.	.	.	.	.	.	.	.	.	.	.	.	.	.	.	.	.	.	.	.	.	.	.	.	.	.	.	.	.	.	.	.	IncHI1B/100/99.47/570	IncFIB(K)/100/91.07/560	.	.	.
CP107226.1	14.2969	31.4959	0.403188	7	n/a	1469	.	.	.	.	.	.	.	.	.	.	.	.	.	.	.	.	.	.	.	.	.	.	.	.	.	.	.	.	.	.	.	.	.	.	.	.	.	.	IncFIB(K)/100/91.25/560	.	.	.	.
CP104679.1	16.7324	25.9353	1	7	n/a	15	.	.	.	.	.	.	.	.	.	.	.	.	.	.	.	.	.	.	.	.	.	.	.	.	.	.	.	.	.	.	.	.	.	.	.	.	.	.	IncHI1B/100/99.3/570	IncFIB(K)/100/91.07/560	.	.	.
CP103732.1	15.4779	27.1239	0.618322	7	n/a	15	.	.	.	.	.	.	.	.	.	.	.	.	.	.	.	.	.	.	.	.	.	.	.	.	.	.	.	.	.	.	.	.	.	.	.	.	.	.	IncHI1B/100/100/570	IncFIB(K)/100/91.07/560	.	.	.
CP102995.1	15.7857	25.2735	0.719506	7	n/a	15	.	.	.	.	.	.	.	.	.	.	.	.	.	.	.	.	.	.	.	.	.	.	.	.	.	.	.	.	.	.	.	.	.	.	.	.	.	.	IncHI1B/100/99.3/570	IncFIB(K)/100/91.07/560	.	.	.
CP102988.1	17.6783	25.882	1	7	n/a	147	.	.	.	.	.	.	.	.	.	.	.	.	.	.	.	.	.	.	.	.	.	.	.	.	.	.	.	.	.	.	.	.	.	.	.	.	.	.	IncFIB(K)/100/91.07/560	.	.	.	.
CP102870.1	16.3747	26.007	0.941532	7	n/a	495	.	.	.	.	.	.	.	.	.	.	.	.	.	.	.	.	.	.	.	.	.	.	.	.	.	.	.	.	.	.	.	.	.	.	.	.	.	.	IncHI1B/100/100/570	IncFIB(K)/100/91.07/560	.	.	.
CP096811.1	13.1693	29.9853	0.384524	7	n/a	530	.	.	.	.	.	.	.	.	.	.	.	.	.	.	.	.	.	.	.	.	.	.	.	.	.	.	.	.	.	.	.	.	.	.	.	.	.	.	FIA(pBK30683)/100/97.29/295	IncFIB(K)/100/91.43/560	Col440II/100/100/282	.	.
CP096261.1	15.1353	25.7662	0.609035	7	n/a	15	.	.	.	.	.	.	.	.	.	.	.	.	.	.	.	.	.	.	.	.	.	.	.	.	.	.	.	.	.	.	.	.	.	.	.	.	.	.	IncHI1B/100/100/570	IncFIB(K)/100/91.25/560	.	.	.
CP095469.1	20.7042	27.7248	1	7	n/a	258	.	.	.	.	.	.	.	.	.	.	.	.	.	.	.	.	.	.	.	.	.	.	.	.	.	.	.	.	.	.	.	.	.	.	.	.	.	.	.	.	.	.	.
CP094888.1	20.6598	27.7095	0.379922	7	n/a	258	.	.	.	.	.	.	.	.	.	.	.	.	.	.	.	.	.	.	.	.	.	.	.	.	.	.	.	.	.	.	.	.	.	.	.	.	.	.	.	.	.	.	.
CP092410.1	17.0365	27.6946	0.75073	7	n/a	107	.	.	.	.	.	.	.	.	.	.	.	.	.	.	.	.	.	.	.	.	.	.	.	.	.	.	.	.	.	.	.	.	.	.	.	.	.	.	IncFIB(K)/100/91.43/560	IncHI1B/100/100/570	.	.	.
CP092407.1	16.9555	27.6894	0.758944	7	n/a	1117	.	.	.	.	.	.	.	.	.	.	.	.	.	.	.	.	.	.	.	.	.	.	.	.	.	.	.	.	.	.	.	.	.	.	.	.	.	.	IncFIB(K)/100/91.43/560	IncHI1B/100/100/570	.	.	.
CP092405.1	17.0882	27.6407	0.732519	7	n/a	5754	.	.	.	.	.	.	.	.	.	.	.	.	.	.	.	.	.	.	.	.	.	.	.	.	.	.	.	.	.	.	.	.	.	.	.	.	.	.	IncFIB(K)/100/91.43/560	.	.	.	.
CP092395.1	16.7022	28.8814	0.765626	7	n/a	35	.	.	.	.	.	.	.	.	.	.	.	.	.	.	.	.	.	.	.	.	.	.	.	.	.	.	.	.	.	.	.	.	.	.	.	.	.	.	IncFIB(K)/100/91.43/560	.	.	.	.
CP092078.1	16.7032	25.7261	1	7	n/a	2407	.	.	.	.	.	.	.	.	.	CTX-M-9-like	.	.	.	.	.	.	.	.	.	blaCTX-M-14	.	.	.	.	.	.	.	.	.	.	.	.	.	.	.	.	.	.	IncHI1B/100/99.47/570	IncFIB(K)/100/91.07/560	.	.	.
CP091050.1	16.1071	29.4289	0.59965	7	n/a	464	.	.	.	.	.	.	.	.	.	.	.	.	.	.	.	.	.	.	.	.	.	.	.	.	.	.	.	.	.	.	.	.	.	.	.	.	.	.	IncFIB(K)/100/91.43/560	.	.	.	.
CP089990.1	17.0099	25.7569	1	7	n/a	2407	.	.	.	.	.	.	.	.	.	CTX-M-9-like	.	.	.	.	.	.	.	.	.	blaCTX-M-14	.	.	.	.	.	.	.	.	.	.	.	.	.	.	.	.	.	.	IncFIB(K)/100/91.07/560	.	.	.	.
CP089879.1	18.6111	28.4517	0.585546	7	n/a	442	.	.	.	.	.	.	.	.	.	.	.	.	.	.	.	.	.	.	.	.	.	.	.	.	.	.	.	.	.	.	.	.	.	.	.	.	.	.	IncFIB(K)/100/91.07/560	.	.	.	.
CP089875.1	17.0368	27.6785	0.742231	7	n/a	76	.	.	.	.	.	.	.	.	.	.	.	.	.	.	.	.	.	.	.	.	.	.	.	.	.	.	.	.	.	.	.	.	.	.	.	.	.	.	IncFIB(K)/100/91.43/560	IncHI1B/100/99.47/570	.	.	.
CP089326.1	17.9967	27.3461	0.839232	7	n/a	29	.	.	.	.	.	.	.	.	.	.	.	.	.	.	.	.	.	.	.	.	.	.	.	.	.	.	.	.	.	.	.	.	.	.	.	.	.	.	IncFIB(K)/100/91.07/560	.	.	.	.
CP086762.1	16.806	25.591	0.987164	7	n/a	20	.	.	.	.	.	.	.	.	.	.	.	NDM-like	.	.	.	.	.	SHV-like	.	.	.	.	.	.	.	.	blaNDM-1	.	.	.	.	.	.	.	.	.	.	blaSHV-12	IncHI1B/100/99.47/570	IncX3/100/100/374	IncFIB(K)/100/91.07/560	.	.
CP085867.1	15.9535	29.3317	0.578735	7	n/a	219	.	.	.	.	.	.	.	.	.	.	.	.	.	.	.	.	.	.	.	.	.	.	.	.	.	.	.	.	.	.	.	.	.	.	.	.	.	.	IncFIB(K)/100/91.43/560	.	.	.	.
CP085732.1	16.9183	26.0275	1	7	n/a	54	.	.	.	.	.	.	.	.	.	.	.	.	.	.	.	.	.	.	.	.	.	.	.	.	.	.	.	.	.	.	.	.	.	.	.	.	.	.	IncFIB(K)/100/91.07/560	IncHI1B/100/99.47/570	.	.	.
CP084104.1	17.0194	26.5157	1	7	n/a	1383	.	.	.	.	.	.	.	.	.	.	.	.	.	.	.	.	.	.	.	.	.	.	.	.	.	.	.	.	.	.	.	.	.	.	.	.	.	.	IncFIB(K)/100/91.07/560	.	.	.	.
CP083052.1	16.746	28.9948	0.765626	7	n/a	37	.	.	.	.	.	.	.	.	.	.	.	.	.	.	.	.	.	.	.	.	.	.	.	.	.	.	.	.	.	.	.	.	.	.	.	.	.	.	IncFIB(K)/100/91.43/560	.	.	.	.
CP082026.1	16.8687	26.142	1	7	n/a	11	.	.	.	.	.	.	.	.	.	.	.	.	.	.	.	.	.	SHV-like	.	.	.	.	.	.	.	.	.	.	.	.	.	.	.	.	.	.	blaSHV-11	.	IncHI1B/100/99.47/570	IncFIB(K)/100/91.07/560	.	.	.
CP082021.1	16.8494	26.1147	1	7	n/a	11	.	.	.	.	.	.	.	.	.	.	.	.	.	.	.	.	.	SHV-like	.	.	.	.	.	.	.	.	.	.	.	.	.	.	.	.	.	.	.	blaSHV-12	IncHI1B/100/99.47/570	IncFIB(K)/100/91.07/560	.	.	.
CP077815.1	11.8302	31.4632	0.330505	7	n/a	5035	.	.	.	.	.	.	.	.	.	.	.	.	.	.	.	.	.	.	.	.	.	.	.	.	.	.	.	.	.	.	.	.	.	.	.	.	.	.	IncFIB(K)/100/90.89/560	IncHI1B/100/99.82/570	.	.	.
CP077783.1	15.3198	29.1738	0.52228	7	n/a	377	.	.	.	.	.	CTX-M-1-like	.	.	.	.	.	.	.	OXA-1-like	.	.	.	.	blaCTX-M-15	.	.	.	.	.	.	.	.	blaOXA-1	.	.	.	.	.	.	.	.	.	.	IncHI1B/74.04/100/570	IncFIB(K)/100/91.43/560	.	.	.
CP074520.1	17.0996	26.5821	1	7	n/a	17	.	.	.	.	.	.	.	.	.	.	.	.	.	.	.	.	.	.	.	.	.	.	.	.	.	.	.	.	.	.	.	.	.	.	.	.	.	.	IncFIB(K)/100/91.07/560	.	.	.	.
CP073907.1	14.5895	25.9986	0.467534	7	n/a	273	.	.	.	.	.	CTX-M-1-like	.	.	.	.	.	.	.	.	.	.	.	SHV-like	blaCTX-M-15	.	.	.	.	.	.	.	.	.	.	.	.	.	.	.	.	.	.	.	IncFIB(K)/100/91.25/560	.	.	.	.
CP071386.1	15.2001	25.7108	0.610894	7	n/a	37	.	.	.	.	.	.	.	.	.	.	.	.	.	.	.	.	.	.	.	.	.	.	.	.	.	.	.	.	.	.	.	.	.	.	.	.	.	.	IncFIB(K)/100/91.25/560	.	.	.	.
CP071170.1	16.7726	26.0097	1	7	n/a	789	.	.	.	.	.	.	.	.	.	.	.	.	.	.	.	.	.	.	.	.	.	.	.	.	.	.	.	.	.	.	.	.	.	.	.	.	.	.	IncHI1B/100/99.47/570	IncFIB(K)/100/91.07/560	.	.	.
CP070106.1	22.8007	25.9985	0.311118	7	n/a	252	.	.	.	.	.	.	.	.	.	.	.	.	.	.	.	.	.	.	.	.	.	.	.	.	.	.	.	.	.	.	.	.	.	.	.	.	.	.	.	.	.	.	.
CP070038.1	16.3895	29.2445	0.745383	7	n/a	298	.	.	.	.	.	.	.	.	.	.	.	.	.	.	.	.	.	.	.	.	.	.	.	.	.	.	.	.	.	.	.	.	.	.	.	.	.	.	IncFIB(K)/100/91.43/560	.	.	.	.
CP069863.1	20.0098	27.9084	0.481862	7	n/a	20	.	.	.	.	.	.	.	.	.	.	.	.	.	.	.	.	.	.	.	.	.	.	.	.	.	.	.	.	.	.	.	.	.	.	.	.	.	.	IncFIB(K)/100/91.25/560	.	.	.	.
CP069846.1	17.1191	26.7985	1	7	n/a	4	.	.	.	.	.	.	.	.	.	.	.	.	.	.	.	.	.	.	.	.	.	.	.	.	.	.	.	.	.	.	.	.	.	.	.	.	.	.	IncFIB(K)/100/91.07/560	.	.	.	.
CP067551.1	16.195	29.3757	0.637492	7	n/a	111	.	.	.	.	.	.	.	.	.	.	.	.	.	.	.	.	.	.	.	.	.	.	.	.	.	.	.	.	.	.	.	.	.	.	.	.	.	.	IncFIB(K)/100/91.43/560	.	.	.	.
CP067510.1	15.5689	27.103	0.648913	7	n/a	15	.	.	.	.	.	.	.	.	.	.	.	.	.	.	.	.	.	.	.	.	.	.	.	.	.	.	.	.	.	.	.	.	.	.	.	.	.	.	IncHI1B/100/100/570	IncFIB(K)/100/91.07/560	.	.	.
CP065459.1	17.7256	27.8891	0.723058	7	n/a	-	.	.	.	.	.	.	.	.	.	.	.	.	.	.	.	.	.	.	.	.	.	.	.	.	.	.	.	.	.	.	.	.	.	.	.	.	.	.	IncFIB(K)/100/91.43/560	IncHI1B/100/99.3/570	.	.	.
CP063931.1	11.8122	31.9827	0.314088	7	n/a	111	.	iroB	rmpA	.	peg344	.	.	.	.	.	.	.	.	.	.	.	.	.	.	.	.	.	.	.	.	.	.	.	.	.	.	.	.	.	.	.	.	.	IncHI1B/100/99.12/570	IncFIB(K)/100/91.07/560	.	.	.
CP063872.1	11.9181	31.5544	0.327632	7	n/a	1662	.	.	.	.	.	.	.	.	.	.	.	.	.	.	.	.	.	.	.	.	.	.	.	.	.	.	.	.	.	.	.	.	.	.	.	.	.	.	IncFIB(K)/100/91.07/560	IncHI1B/100/99.65/570	.	.	.
CP063216.1	14.8557	25.918	0.533111	7	n/a	15	.	.	.	.	.	.	.	.	.	.	.	.	.	.	.	.	.	.	.	.	.	.	.	.	.	.	.	.	.	.	.	.	.	.	.	.	.	.	IncHI1B/100/100/570	IncFIB(K)/100/91.25/560	.	.	.
CP063014.1	15.6665	28.4623	0.700618	7	n/a	147	.	.	.	.	.	CTX-M-1-like	.	.	.	.	.	NDM-like	.	OXA-1-like	.	.	.	.	blaCTX-M-15	.	.	.	.	.	.	.	blaNDM-1	blaOXA-1	.	.	.	.	.	.	.	.	.	.	IncHI1B/100/100/570	IncFIB(K)/100/91.43/560	IncFIA(HI1)/100/96.39/388	.	.
CP062987.1	15.3248	29.0991	0.515721	7	n/a	377	.	.	.	.	.	CTX-M-1-like	.	.	.	.	.	.	.	OXA-1-like	.	.	.	.	blaCTX-M-15	.	.	.	.	.	.	.	.	blaOXA-1	.	.	.	.	.	.	.	.	.	.	IncHI1B/100/100/570	IncFIB(K)/100/91.43/560	.	.	.
CP061702.1	16.6505	29.0113	0.763176	7	n/a	37	.	.	.	.	.	.	.	.	.	.	.	.	.	.	.	.	.	.	.	.	.	.	.	.	.	.	.	.	.	.	.	.	.	.	.	.	.	.	IncFIB(K)/100/91.43/560	.	.	.	.
CP061360.1	16.5534	25.0334	0.681918	7	n/a	304	.	.	.	.	.	.	.	.	.	CTX-M-9-like	.	NDM-like	.	.	.	.	.	.	.	blaCTX-M-14	.	.	.	.	.	.	blaNDM-1	.	.	.	.	.	.	.	.	.	.	.	IncHI1B/100/99.47/570	IncFIB(K)/100/91.07/560	.	.	.
CP060050.1	15.961	29.3314	0.580814	7	n/a	37	.	.	.	.	.	.	.	.	.	.	.	.	.	.	.	.	.	.	.	.	.	.	.	.	.	.	.	.	.	.	.	.	.	.	.	.	.	.	IncFIB(K)/100/91.43/560	.	.	.	.
CP058549.1	18.6341	26.8044	0.637046	7	n/a	231	.	.	.	.	.	.	.	.	.	.	.	.	.	.	.	.	.	.	.	.	.	.	.	.	.	.	.	.	.	.	.	.	.	.	.	.	.	.	IncFIB(K)/100/91.25/560	IncHI1B/100/99.47/570	.	.	.
CP058546.1	17.8576	25.1597	0.710849	7	n/a	1269	.	.	.	.	.	.	.	.	.	.	.	.	.	OXA-1-like	.	.	.	.	.	.	.	.	.	.	.	.	.	blaOXA-1	.	.	.	.	.	.	.	.	.	.	IncHI1B/100/99.3/570	IncFIB(K)/100/91.25/560	.	.	.
CP057035.1	14.486	30.9463	0.439664	7	n/a	2426	.	.	.	.	.	.	.	.	.	.	.	.	.	.	.	.	.	.	.	.	.	.	.	.	.	.	.	.	.	.	.	.	.	.	.	.	.	.	IncHI1B/100/99.47/570	IncFIB(K)/100/91.25/560	.	.	.
CP056433.1	20.0811	27.847	0.471548	7	n/a	20	.	.	.	.	.	.	.	.	.	.	.	.	.	.	.	.	.	.	.	.	.	.	.	.	.	.	.	.	.	.	.	.	.	.	.	.	.	.	IncFIB(K)/100/91.25/560	.	.	.	.
CP056223.1	20.1374	27.999	0.449803	7	n/a	461	.	.	.	.	.	.	.	.	.	.	.	.	.	.	.	.	.	.	.	.	.	.	.	.	.	.	.	.	.	.	.	.	.	.	.	.	.	.	IncFIB(K)/100/91.25/560	.	.	.	.
CP055175.1	16.5979	25.7615	0.941165	7	n/a	35	.	.	.	.	.	.	.	.	.	.	.	.	.	.	.	.	.	.	.	.	.	.	.	.	.	.	.	.	.	.	.	.	.	.	.	.	.	.	IncHI1B/100/99.47/570	IncFIB(K)/100/91.07/560	.	.	.
CP055163.1	16.6222	25.2748	0.752164	7	n/a	709	.	.	.	.	.	.	.	.	.	.	.	.	.	OXA-1-like	.	.	.	.	.	.	.	.	.	.	.	.	.	blaOXA-1	.	.	.	.	.	.	.	.	.	.	IncHI1B/100/99.47/570	IncR/100/100/251	IncFIA(HI1)/99.74/98.45/388	IncFIB(K)/100/91.07/560	.
CP055062.1	16.6848	25.9939	1	7	n/a	39	.	.	.	.	.	.	.	.	.	.	.	.	.	.	.	.	.	.	.	.	.	.	.	.	.	.	.	.	.	.	.	.	.	.	.	.	.	.	IncFIB(K)/100/91.07/560	.	.	.	.
CP054991.1	18.8216	26.6898	0.598149	7	n/a	-	.	.	.	.	.	.	.	.	.	.	.	.	.	.	.	.	.	.	.	.	.	.	.	.	.	.	.	.	.	.	.	.	.	.	.	.	.	.	IncR/100/99.6/251	IncFIB(K)/100/91.07/560	.	.	.
CP053667.1	16.6649	29.0057	0.761536	7	n/a	37	.	.	.	.	.	.	.	.	.	.	.	.	.	.	.	.	.	.	.	.	.	.	.	.	.	.	.	.	.	.	.	.	.	.	.	.	.	.	IncFIB(K)/100/91.43/560	.	.	.	.
CP052373.1	15.975	29.8896	0.635212	7	n/a	20	.	.	.	.	.	.	.	.	.	.	.	.	.	.	.	.	.	.	.	.	.	.	.	.	.	.	.	.	.	.	.	.	.	.	.	.	.	.	IncFIB(K)/100/91.43/560	.	.	.	.
CP052329.1	18.7161	28.0818	0.718572	7	n/a	37	.	.	.	.	.	.	.	.	.	.	.	.	.	.	.	.	.	.	.	.	.	.	.	.	.	.	.	.	.	.	.	.	.	.	.	.	.	.	IncHI1B/100/99.47/570	IncFIB(K)/100/91.07/560	.	.	.
CP050847.1	17.3121	27.8859	0.730184	7	n/a	228	.	.	.	.	.	.	.	.	.	.	.	.	.	.	.	.	.	.	.	.	.	.	.	.	.	.	.	.	.	.	.	.	.	.	.	.	.	.	IncFIB(K)/100/91.43/560	.	.	.	.
CP050844.1	18.0136	27.1848	0.902414	7	n/a	4327	.	.	.	.	.	.	.	.	.	.	.	.	.	.	.	.	.	.	.	.	.	.	.	.	.	.	.	.	.	.	.	.	.	.	.	.	.	.	IncFIB(K)/100/91.07/560	.	.	.	.
CP050836.1	16.8872	26.1727	1	7	n/a	25	.	.	.	.	.	.	.	.	.	.	.	.	.	.	.	.	.	SHV-like	.	.	.	.	.	.	.	.	.	.	.	.	.	.	.	.	.	.	.	.	IncFIB(K)/100/91.07/560	IncHI1B/100/99.47/570	.	.	.
CP050830.1	18.0245	27.1557	0.91542	7	n/a	629	.	.	.	.	.	.	.	.	.	.	.	.	.	.	.	.	.	.	.	.	.	.	.	.	.	.	.	.	.	.	.	.	.	.	.	.	.	.	IncFIB(K)/100/91.07/560	.	.	.	.
CP050827.1	17.0383	27.6814	0.743525	7	n/a	107	.	.	.	.	.	.	.	.	.	.	.	.	.	.	.	.	.	.	.	.	.	.	.	.	.	.	.	.	.	.	.	.	.	.	.	.	.	.	IncFIB(K)/100/91.43/560	IncHI1B/100/99.47/570	.	.	.
CP050823.1	17.9762	27.4114	0.809223	7	n/a	-	.	.	.	.	.	.	.	.	.	.	.	.	.	.	.	.	.	.	.	.	.	.	.	.	.	.	.	.	.	.	.	.	.	.	.	.	.	.	IncFIB(K)/100/91.07/560	.	.	.	.
CP046613.1	16.9533	26.2625	1	7	n/a	307	.	.	.	.	.	.	.	.	.	.	.	.	.	.	.	.	.	SHV-like	.	.	.	.	.	.	.	.	.	.	.	.	.	.	.	.	.	.	.	.	IncFIB(K)/100/91.07/560	.	.	.	.
CP045662.1	17.4006	28.3163	0.765626	7	n/a	25	.	.	.	.	.	.	.	.	.	.	.	.	.	.	.	.	.	.	.	.	.	.	.	.	.	.	.	.	.	.	.	.	.	.	.	.	.	.	IncFIB(K)/100/91.07/560	.	.	.	.
CP045194.1	17.1139	26.5885	1	7	n/a	17	.	.	.	.	.	.	.	.	.	.	.	.	.	.	.	.	.	.	.	.	.	.	.	.	.	.	.	.	.	.	.	.	.	.	.	.	.	.	IncFIB(K)/100/91.07/560	.	.	.	.
CP044036.1	15.7258	28.6364	0.663731	7	n/a	147	.	.	.	.	.	.	.	.	.	.	.	.	.	.	.	.	.	.	.	.	.	.	.	.	.	.	.	.	.	.	.	.	.	.	.	.	.	.	IncFIB(K)/100/91.43/560	IncHI1B/100/100/570	.	.	.
CP043934.1	17.7367	25.9965	1	7	n/a	3410	.	.	.	.	.	.	.	.	.	.	.	.	.	.	.	.	.	.	.	.	.	.	.	.	.	.	.	.	.	.	.	.	.	.	.	.	.	.	IncFIB(K)/100/91.07/560	.	.	.	.
CP042482.1	15.995	27.1962	0.698242	7	n/a	12	.	.	.	.	.	.	.	.	.	.	.	.	.	.	.	.	.	.	.	.	.	.	.	.	.	.	.	.	.	.	.	.	.	.	.	.	.	.	IncHI1B/100/100/570	IncFIB(K)/100/91.07/560	.	.	.
CP035203.1	18.5263	28.6068	0.584344	7	n/a	39	.	.	.	.	.	.	.	.	.	.	.	.	.	.	.	.	.	.	.	.	.	.	.	.	.	.	.	.	.	.	.	.	.	.	.	.	.	.	IncFIB(K)/100/91.07/560	.	.	.	.
CP055034.1	18.9942	26.7023	0.588908	7	n/a	17	iucA	.	.	.	.	.	.	.	.	.	.	.	.	.	.	.	.	.	.	.	.	.	.	.	.	.	.	.	.	.	.	.	.	.	.	.	.	.	IncFIB(K)/100/91.07/560	.	.	.	.
CP019161.1	11.8286	31.9909	0.312332	7	n/a	485	iucA	iroB	rmpA	rmpA2	peg344	.	.	.	.	.	.	.	.	.	.	.	.	.	.	.	.	.	.	.	.	.	.	.	.	.	.	.	.	.	.	.	.	.	IncFIB(K)/100/91.07/560	IncHI1B/100/99.12/570	.	.	.
CP033758.1	16.2645	29.4157	0.647119	7	n/a	252	.	.	.	.	.	.	.	.	.	.	.	.	.	.	.	.	.	.	.	.	.	.	.	.	.	.	.	.	.	.	.	.	.	.	.	.	.	.	IncFIB(K)/100/91.43/560	.	.	.	.
CP031815.1	18.574	28.6984	0.557181	7	n/a	230	.	.	.	.	.	.	.	.	.	.	.	.	.	.	.	.	.	.	.	.	.	.	.	.	.	.	.	.	.	.	.	.	.	.	.	.	.	.	IncFIB(K)/100/91.07/560	.	.	.	.
CP031809.1	18.5554	27.2518	0.711826	7	n/a	29	.	.	.	.	.	.	.	.	.	.	.	.	.	.	.	.	.	.	.	.	.	.	.	.	.	.	.	.	.	.	.	.	.	.	.	.	.	.	IncFIB(K)/100/91.07/560	.	.	.	.
CP031799.1	16.794	28.5028	0.765626	7	n/a	43	.	.	.	.	.	.	.	.	.	.	.	.	.	.	.	.	.	.	.	.	.	.	.	.	.	.	.	.	.	.	.	.	.	.	.	.	.	.	IncHI1B/100/100/570	IncFIB(K)/100/91.43/560	.	.	.
CP031796.1	14.0505	31.7374	0.383467	7	n/a	45	.	.	.	.	.	.	.	.	.	.	.	.	.	.	.	.	.	.	.	.	.	.	.	.	.	.	.	.	.	.	.	.	.	.	.	.	.	.	IncFIB(K)/100/91.43/560	.	.	.	.
CP031563.1	16.4516	25.7948	0.849006	7	n/a	726	.	.	.	.	.	.	.	.	.	.	.	.	.	OXA-1-like	.	.	.	.	.	.	.	.	.	.	.	.	.	blaOXA-1	.	.	.	.	.	.	.	.	.	.	IncHI1B/100/100/570	IncFIB(K)/100/91.07/560	.	.	.
CP029739.1	17.7263	26.0923	1	7	n/a	16	.	.	.	.	.	.	.	.	.	.	.	.	.	.	.	.	.	.	.	.	.	.	.	.	.	.	.	.	.	.	.	.	.	.	.	.	.	.	IncFIB(K)/100/91.07/560	.	.	.	.
CP027603.1	16.684	26.4872	0.927758	7	n/a	1224	.	.	.	.	.	.	.	.	.	.	.	.	.	OXA-1-like	.	.	.	.	.	.	.	.	.	.	.	.	.	blaOXA-1	.	.	.	.	.	.	.	.	.	.	IncFIB(K)/100/91.07/560	.	.	.	.
CP026154.1	15.2037	25.6886	0.608255	7	n/a	37	.	.	.	.	.	.	.	.	.	.	.	.	.	.	.	.	.	SHV-like	.	.	.	.	.	.	.	.	.	.	.	.	.	.	.	.	.	.	.	blaSHV-12	IncFIB(K)/100/91.25/560	.	.	.	.
CP024875.1	16.9169	25.9732	1	7	n/a	15	.	.	.	.	.	.	.	.	.	.	.	.	.	.	.	.	.	.	.	.	.	.	.	.	.	.	.	.	.	.	.	.	.	.	.	.	.	.	IncHI1B/100/99.47/570	IncFIB(K)/100/91.07/560	.	.	.
CP023917.1	15.6274	29.1223	0.543875	7	n/a	147	.	.	.	.	.	.	.	.	.	.	.	.	.	.	.	.	.	SHV-like	.	.	.	.	.	.	.	.	.	.	.	.	.	.	.	.	.	.	.	blaSHV-12	IncHI1B/100/100/570	IncFIB(K)/100/91.43/560	.	.	.
CP023417.1	17.0003	30.3059	0.494852	7	n/a	54	.	.	.	.	.	.	.	.	.	.	.	.	.	.	.	.	.	.	.	.	.	.	.	.	.	.	.	.	.	.	.	.	.	.	.	.	.	.	IncFIB(K)/100/92.14/560	.	.	.	.
CP021961.1	14.4942	26.6627	0.431663	7	n/a	37	.	.	.	.	.	.	.	.	.	.	.	NDM-like	OXA-10-like	.	.	.	.	.	.	.	.	.	.	.	.	.	blaNDM-1	.	.	.	.	.	.	.	.	.	.	.	IncHI1B/100/100/570	IncFIB(K)/100/91.43/560	.	.	.
CP021958.1	19.8618	26.0788	0.453721	7	n/a	37	.	.	.	.	.	.	.	.	.	.	.	.	OXA-10-like	.	.	.	.	.	.	.	.	.	.	.	.	.	.	.	.	.	.	.	.	.	.	.	.	.	IncHI1B/100/100/570	.	.	.	.
CP021697.1	17.1025	26.5576	1	7	n/a	163	.	.	.	.	.	.	.	.	.	.	.	.	.	.	.	.	.	.	.	.	.	.	.	.	.	.	.	.	.	.	.	.	.	.	.	.	.	.	IncFIB(K)/100/91.07/560	.	.	.	.
CP015026.1	15.246	25.7301	0.629533	7	n/a	273	.	.	.	.	.	.	.	.	.	.	.	.	.	.	.	.	.	.	.	.	.	.	.	.	.	.	.	.	.	.	.	.	.	.	.	.	.	.	IncHI1B/100/99.47/570	IncFIB(K)/100/91.25/560	.	.	.
CP014763.1	16.886	30.323	0.499775	7	n/a	37	.	.	.	.	.	.	.	.	.	.	.	.	.	.	.	.	.	.	.	.	.	.	.	.	.	.	.	.	.	.	.	.	.	.	.	.	.	.	IncFIB(K)/100/91.25/560	.	.	.	.
CP013713.1	14.3964	26.9658	0.412053	7	n/a	111	.	.	.	.	.	.	.	.	.	.	.	.	.	.	.	.	.	.	.	.	.	.	.	.	.	.	.	.	.	.	.	.	.	.	.	.	.	.	IncFIB(K)/100/91.07/560	IncHI1B/100/99.47/570	.	.	.
CP009865.1	18.2828	28.4635	0.625753	7	n/a	1518	.	.	.	.	.	.	.	.	.	.	.	.	.	.	.	.	.	.	.	.	.	.	.	.	.	.	.	.	.	.	.	.	.	.	.	.	.	.	IncFIB(K)/100/91.07/560	IncHI1B/100/100/570	.	.	.
908343_p3	16.2022	-38.8777	0.996491	9	Georgia	23	.	.	.	.	.	.	.	.	.	.	.	.	.	.	.	.	.	SHV-like	.	.	.	.	.	.	.	.	.	.	.	.	.	.	.	.	.	.	.	blaSHV-12	IncA/C2/100/100/417	.	.	.	.
908271_p2	16.2518	-38.8849	1	9	Georgia	23	.	.	.	.	.	.	.	.	.	.	.	.	.	.	.	.	.	SHV-like	.	.	.	.	.	.	.	.	.	.	.	.	.	.	.	.	.	.	.	blaSHV-12	IncA/C2/100/100/417	.	.	.	.
804398_p2	16.0231	-38.5766	1	9	Georgia	48	.	.	.	.	.	.	.	.	.	.	.	NDM-like	.	.	.	.	.	.	.	.	.	.	.	.	.	.	.	.	.	.	.	.	.	.	.	.	.	.	IncA/C2/100/100/417	.	.	.	.
517485_p3	12.4625	-38.5078	0.602284	9	Jordan	1399	.	.	.	.	.	.	.	.	.	.	.	.	.	.	.	.	.	.	.	.	.	.	.	.	.	.	.	.	.	.	.	.	.	.	.	.	.	.	IncA/C2/100/100/417	.	.	.	.
515432_p3	12.378	-38.4715	1	9	Jordan	1399	.	.	.	.	.	.	.	.	.	.	.	.	.	.	.	.	.	.	.	.	.	.	.	.	.	.	.	.	.	.	.	.	.	.	.	.	.	.	IncA/C2/100/100/417	.	.	.	.
LR890704.1	13.8938	-38.4064	1	9	n/a	231	.	.	.	.	.	CTX-M-1-like	.	.	.	.	.	.	OXA-10-like	.	.	.	.	.	blaCTX-M-15	.	.	.	.	.	.	.	.	.	.	.	.	.	.	.	.	.	.	.	IncA/C2/100/100/417	.	.	.	.
LR890634.1	13.8938	-38.4064	1	9	n/a	231	.	.	.	.	.	CTX-M-1-like	.	.	.	.	.	.	OXA-10-like	.	.	.	.	.	blaCTX-M-15	.	.	.	.	.	.	.	.	.	.	.	.	.	.	.	.	.	.	.	IncA/C2/100/100/417	.	.	.	.
LR890548.1	15.8492	-37.6776	0.845922	9	n/a	340	.	.	.	.	.	.	.	.	.	.	.	.	.	.	.	.	.	.	.	.	.	.	.	.	.	.	.	.	.	.	.	.	.	.	.	.	.	.	IncA/C2/100/100/417	.	.	.	.
LR890517.1	13.8938	-38.4064	1	9	n/a	231	.	.	.	.	.	CTX-M-1-like	.	.	.	.	.	.	OXA-10-like	.	.	.	.	.	blaCTX-M-15	.	.	.	.	.	.	.	.	.	.	.	.	.	.	.	.	.	.	.	IncA/C2/100/100/417	.	.	.	.
LR890502.1	13.8938	-38.4064	1	9	n/a	231	.	.	.	.	.	CTX-M-1-like	.	.	.	.	.	.	OXA-10-like	.	.	.	.	.	blaCTX-M-15	.	.	.	.	.	.	.	.	.	.	.	.	.	.	.	.	.	.	.	IncA/C2/100/100/417	.	.	.	.
LR890428.1	13.8938	-38.4064	1	9	n/a	231	.	.	.	.	.	CTX-M-1-like	.	.	.	.	.	.	OXA-10-like	.	.	.	.	.	blaCTX-M-15	.	.	.	.	.	.	.	.	.	.	.	.	.	.	.	.	.	.	.	IncA/C2/100/100/417	.	.	.	.
LR890256.1	13.8938	-38.4064	1	9	n/a	231	.	.	.	.	.	CTX-M-1-like	.	.	.	.	.	.	OXA-10-like	.	.	.	.	.	blaCTX-M-15	.	.	.	.	.	.	.	.	.	.	.	.	.	.	.	.	.	.	.	IncA/C2/100/100/417	.	.	.	.
CP117223.1	17.1536	-38.9918	0.684776	9	n/a	11	.	.	.	.	.	.	.	.	.	.	.	NDM-like	.	.	.	.	.	.	.	.	.	.	.	.	.	.	blaNDM-1	.	.	.	.	.	.	.	.	.	.	.	IncA/C2/100/100/417	.	.	.	.
CP110969.1	14.4074	-38.5763	1	9	n/a	1519	.	.	.	.	.	.	.	.	.	.	.	.	.	.	.	.	.	.	.	.	.	.	.	.	.	.	.	.	.	.	.	.	.	.	.	.	.	.	IncA/C2/100/100/417	.	.	.	.
CP110527.1	12.7155	-38.4367	0.681592	9	n/a	-	.	.	.	.	.	.	.	.	.	.	.	NDM-like	.	.	.	.	.	.	.	.	.	.	.	.	.	.	blaNDM-1	.	.	.	.	.	.	.	.	.	.	.	IncA/C2/100/100/417	.	.	.	.
CP110518.1	12.7846	-38.3395	0.71206	9	n/a	-	.	.	.	.	.	.	.	.	.	.	.	NDM-like	.	.	.	.	.	.	.	.	.	.	.	.	.	.	blaNDM-1	.	.	.	.	.	.	.	.	.	.	.	IncA/C2/100/100/417	.	.	.	.
CP106914.1	15.0991	-38.442	1	9	n/a	11	.	.	.	.	.	.	.	.	.	.	.	.	OXA-10-like	.	.	.	.	.	.	.	.	.	.	.	.	.	.	.	.	.	.	.	.	.	.	.	.	.	IncA/C2/100/100/417	.	.	.	.
CP106909.1	15.097	-38.4429	1	9	n/a	11	.	.	.	.	.	.	.	.	.	.	.	.	OXA-10-like	.	.	.	.	.	.	.	.	.	.	.	.	.	.	.	.	.	.	.	.	.	.	.	.	.	IncA/C2/100/100/417	.	.	.	.
CP103514.1	15.2337	-39.1096	1	9	n/a	23	.	.	.	.	.	CTX-M-1-like	.	.	.	.	.	.	OXA-10-like	OXA-1-like	.	.	.	.	blaCTX-M-15	.	.	.	.	.	.	.	.	blaOXA-1	.	.	.	.	.	.	.	.	.	.	IncA/C2/100/100/417	.	.	.	.
CP102989.1	14.1716	-38.4842	0.942148	9	n/a	147	.	.	.	.	.	.	.	.	.	.	.	.	.	.	.	.	.	.	.	.	.	.	.	.	.	.	.	.	.	.	.	.	.	.	.	.	.	.	IncA/C2/100/100/417	.	.	.	.
CP099750.1	16.4269	-39.2265	1	9	n/a	35	.	.	.	.	.	.	.	.	.	.	.	.	.	.	.	OXA-48-like	.	.	.	.	.	.	.	.	.	.	.	.	.	.	.	.	.	.	.	.	.	.	IncA/C2/100/100/417	.	.	.	.
CP099747.1	16.3824	-39.3285	0.921952	9	n/a	35	.	.	.	.	.	.	.	.	.	.	.	.	.	.	.	OXA-48-like	.	.	.	.	.	.	.	.	.	.	.	.	.	.	.	.	.	.	.	.	.	.	IncA/C2/100/100/417	.	.	.	.
CP097701.1	12.0058	-38.5764	0.504008	9	n/a	11	.	.	.	.	.	.	.	.	.	.	.	.	.	.	.	.	.	.	.	.	.	.	.	.	.	.	.	.	.	.	.	.	.	.	.	.	.	.	IncA/C2/100/100/417	.	.	.	.
CP097667.1	14.3919	-38.3074	0.944271	9	n/a	11	.	.	.	.	.	.	.	.	.	.	.	.	.	.	.	.	.	.	.	.	.	.	.	.	.	.	.	.	.	.	.	.	.	.	.	.	.	.	IncA/C2/100/100/417	.	.	.	.
CP095763.1	14.2974	-39.408	0.979096	9	n/a	37	.	.	.	.	.	.	.	.	.	.	.	NDM-like	.	.	.	.	.	.	.	.	.	.	.	.	.	.	blaNDM-1	.	.	.	.	.	.	.	.	.	.	.	IncA/C2/100/100/417	.	.	.	.
CP094993.1	16.0806	-38.5638	1	9	n/a	39	.	.	.	.	.	.	.	.	.	.	.	NDM-like	OXA-10-like	OXA-1-like	.	.	.	.	.	.	.	.	.	.	.	.	blaNDM-1	blaOXA-1	.	.	.	.	.	.	.	.	.	.	IncA/C2/100/100/417	.	.	.	.
CP094370.1	15.5525	-38.9248	1	9	n/a	39	.	.	.	.	.	CTX-M-1-like	.	.	.	.	.	.	.	.	.	.	.	.	.	.	.	.	.	.	.	.	.	.	.	.	.	.	.	.	.	.	.	.	IncA/C2/100/100/417	.	.	.	.
CP090430.1	13.6711	-39.6292	0.691502	9	n/a	25	.	.	.	.	.	.	.	.	.	.	.	NDM-like	.	.	.	.	.	SHV-like	.	.	.	.	.	.	.	.	blaNDM-1	.	.	.	.	.	.	.	.	.	.	.	IncA/C2/100/100/417	.	.	.	.
CP090205.1	17.1099	-39.0085	0.707621	9	n/a	11	.	.	.	.	.	.	.	.	.	.	.	NDM-like	.	.	.	.	.	.	.	.	.	.	.	.	.	.	blaNDM-1	.	.	.	.	.	.	.	.	.	.	.	IncA/C2/100/100/417	.	.	.	.
CP089878.1	15.8531	-42.0315	0.398411	9	n/a	442	.	.	.	.	.	.	.	.	.	.	.	.	.	.	.	.	.	.	.	.	.	.	.	.	.	.	.	.	.	.	.	.	.	.	.	.	.	.	IncA/C2/100/100/417	.	.	.	.
CP089019.1	14.7381	-40.7025	0.736626	9	n/a	11	.	.	.	.	.	.	.	.	.	CTX-M-9-like	.	.	.	.	.	.	.	.	.	blaCTX-M-14	.	.	.	.	.	.	.	.	.	.	.	.	.	.	.	.	.	.	IncA/C2/100/100/417	.	.	.	.
CP087671.1	14.2069	-39.2624	1	9	n/a	37	.	.	.	.	.	.	.	.	.	.	.	NDM-like	.	.	.	.	.	.	.	.	.	.	.	.	.	.	blaNDM-1	.	.	.	.	.	.	.	.	.	.	.	IncA/C2/100/100/417	.	.	.	.
CP087274.1	17.1573	-38.9938	0.683486	9	n/a	11	.	.	.	.	.	.	.	.	.	.	.	NDM-like	.	.	.	.	.	.	.	.	.	.	.	.	.	.	blaNDM-1	.	.	.	.	.	.	.	.	.	.	.	IncA/C2/100/100/417	.	.	.	.
CP086673.1	16.0802	-38.5634	1	9	n/a	39	.	.	.	.	.	.	.	.	.	.	.	NDM-like	OXA-10-like	OXA-1-like	.	.	.	.	.	.	.	.	.	.	.	.	blaNDM-1	blaOXA-1	.	.	.	.	.	.	.	.	.	.	IncA/C2/100/100/417	.	.	.	.
CP086666.1	16.0531	-38.5809	1	9	n/a	39	.	.	.	.	.	.	.	.	.	.	.	NDM-like	OXA-10-like	OXA-1-like	.	.	.	.	.	.	.	.	.	.	.	.	blaNDM-1	blaOXA-1	.	.	.	.	.	.	.	.	.	.	IncA/C2/100/100/417	.	.	.	.
CP086448.1	14.7917	-38.5256	1	9	n/a	101	.	.	.	.	.	.	.	.	.	.	.	NDM-like	OXA-10-like	.	.	.	.	.	.	.	.	.	.	.	.	.	blaNDM-1	.	.	.	.	.	.	.	.	.	.	.	IncA/C2/100/100/417	.	.	.	.
CP086440.1	14.6913	-38.4754	1	9	n/a	101	.	.	.	.	.	.	.	.	.	.	.	.	OXA-10-like	.	.	.	.	.	.	.	.	.	.	.	.	.	.	.	.	.	.	.	.	.	.	.	.	.	IncA/C2/100/100/417	.	.	.	.
CP086432.1	14.6801	-38.4683	1	9	n/a	101	.	.	.	.	.	.	.	.	.	.	.	.	OXA-10-like	.	.	.	.	.	.	.	.	.	.	.	.	.	.	.	.	.	.	.	.	.	.	.	.	.	IncA/C2/100/100/417	.	.	.	.
CP086424.1	14.7054	-38.4982	1	9	n/a	101	.	.	.	.	.	.	.	.	.	.	.	.	OXA-10-like	.	.	.	.	.	.	.	.	.	.	.	.	.	.	.	.	.	.	.	.	.	.	.	.	.	IncA/C2/100/100/417	.	.	.	.
CP086417.1	14.6537	-38.4628	1	9	n/a	101	.	.	.	.	.	.	.	.	.	.	.	.	OXA-10-like	.	.	.	.	.	.	.	.	.	.	.	.	.	.	.	.	.	.	.	.	.	.	.	.	.	IncA/C2/100/100/417	.	.	.	.
CP082989.1	15.2049	-39.0595	1	9	n/a	147	.	.	.	.	.	CTX-M-1-like	.	.	.	.	.	.	OXA-10-like	.	.	.	.	.	blaCTX-M-15	.	.	.	.	.	.	.	.	.	.	.	.	.	.	.	.	.	.	.	IncA/C2/100/100/417	.	.	.	.
CP079808.1	16.3689	-39.0125	1	9	n/a	231	.	.	.	.	.	.	.	.	.	.	.	.	.	.	.	.	.	.	.	.	.	.	.	.	.	.	.	.	.	.	.	.	.	.	.	.	.	.	IncA/C2/100/100/417	.	.	.	.
CP079693.1	16.3167	-39.0594	1	9	n/a	231	.	.	.	.	.	.	.	.	.	.	.	.	.	.	.	.	.	.	.	.	.	.	.	.	.	.	.	.	.	.	.	.	.	.	.	.	.	.	Col440I/100/91.23/114	IncA/C2/100/100/417	.	.	.
CP079656.1	16.2896	-38.9268	1	9	n/a	231	.	.	.	.	.	.	.	.	.	.	.	.	.	.	.	.	.	.	.	.	.	.	.	.	.	.	.	.	.	.	.	.	.	.	.	.	.	.	IncA/C2/100/100/417	.	.	.	.
CP079647.1	11.4085	-37.6351	0.353349	9	n/a	231	.	.	.	.	.	.	.	.	.	.	.	.	.	.	.	.	.	.	.	.	.	.	.	.	.	.	.	.	.	.	.	.	.	.	.	.	.	.	.	.	.	.	.
CP079646.1	17.2019	-37.8533	0.620044	9	n/a	231	.	.	.	.	.	.	.	.	.	.	.	.	.	.	.	.	.	.	.	.	.	.	.	.	.	.	.	.	.	.	.	.	.	.	.	.	.	.	IncFIA/100/99.74/388	IncFII(pAMA1167-NDM-5)/100/98.08/261	IncA/C2/100/100/417	.	.
CP079631.1	15.9734	-38.8949	1	9	n/a	14	.	.	.	.	.	CTX-M-1-like	.	.	.	.	.	.	OXA-10-like	.	.	.	OXA-9-like	.	blaCTX-M-15	.	.	.	.	.	.	.	.	.	.	.	.	blaOXA-9	.	.	.	.	.	.	IncA/C2/100/100/417	.	.	.	.
CP079626.1	15.9293	-38.8853	0.913293	9	n/a	14	.	.	.	.	.	CTX-M-1-like	.	.	.	.	.	.	OXA-10-like	.	.	.	OXA-9-like	.	blaCTX-M-15	.	.	.	.	.	.	.	.	.	.	.	.	blaOXA-9	.	.	.	.	.	.	IncA/C2/100/100/417	.	.	.	.
CP079618.1	16.2207	-39.1191	1	9	n/a	231	.	.	.	.	.	.	.	.	.	.	.	.	.	.	.	.	.	.	.	.	.	.	.	.	.	.	.	.	.	.	.	.	.	.	.	.	.	.	Col440I/100/91.23/114	IncA/C2/100/100/417	.	.	.
CP079173.1	16.9271	-38.1426	0.798321	9	n/a	231	.	.	.	.	.	.	.	.	.	.	.	.	.	OXA-1-like	.	.	.	.	.	.	.	.	.	.	.	.	.	blaOXA-1	.	.	.	.	.	.	.	.	.	.	IncFIA/100/99.74/388	IncFII(pAMA1167-NDM-5)/100/98.08/261	IncA/C2/100/100/417	.	.
CP079116.1	16.8832	-38.1502	0.824533	9	n/a	231	.	.	.	.	.	.	.	.	.	.	.	.	.	OXA-1-like	.	.	.	.	.	.	.	.	.	.	.	.	.	blaOXA-1	.	.	.	.	.	.	.	.	.	.	IncFII(pAMA1167-NDM-5)/100/98.08/261	IncFIA/100/99.74/388	IncA/C2/100/100/417	.	.
CP076553.1	14.9311	-39.7159	0.987772	9	n/a	11	.	.	.	.	.	.	.	.	.	.	KPC-like	.	.	.	.	.	.	.	.	.	.	blaKPC-2	.	.	.	.	.	.	.	.	.	.	.	.	.	.	.	.	IncA/C2/100/100/417	.	.	.	.
CP076009.1	14.4964	-38.3912	0.968937	9	n/a	147	.	.	.	.	.	.	.	.	.	.	.	.	.	.	.	.	.	.	.	.	.	.	.	.	.	.	.	.	.	.	.	.	.	.	.	.	.	.	IncA/C2/100/100/417	.	.	.	.
CP070971.1	13.9481	-41.1112	0.57804	9	n/a	11	.	.	.	.	.	.	.	.	.	CTX-M-9-like	.	.	.	.	.	.	.	.	.	blaCTX-M-14	.	.	.	.	.	.	.	.	.	.	.	.	.	.	.	.	.	.	IncA/C2/100/100/417	.	.	.	.
CP070596.1	12.4114	-39.4273	0.528464	9	n/a	11	.	.	.	.	.	.	.	.	.	.	.	.	.	.	.	.	.	.	.	.	.	.	.	.	.	.	.	.	.	.	.	.	.	.	.	.	.	.	IncA/C2/100/100/417	.	.	.	.
CP070578.1	12.4106	-39.4293	0.528233	9	n/a	11	.	.	.	.	.	.	.	.	.	.	.	.	.	.	.	.	.	.	.	.	.	.	.	.	.	.	.	.	.	.	.	.	.	.	.	.	.	.	IncA/C2/100/100/417	.	.	.	.
CP068573.1	14.3938	-37.7464	0.934598	9	n/a	11	.	.	.	.	.	.	.	.	.	.	.	.	.	.	.	.	.	.	.	.	.	.	.	.	.	.	.	.	.	.	.	.	.	.	.	.	.	.	IncA/C2/100/100/417	IncQ1/66.46/100/796	.	.	.
CP067958.1	15.1581	-37.5869	0.953474	9	n/a	258	.	.	.	.	.	.	.	.	.	.	KPC-like	.	.	.	.	.	.	.	.	.	.	blaKPC-2	.	.	.	.	.	.	.	.	.	.	.	.	.	.	.	.	IncA/C2/100/100/417	.	.	.	.
CP067696.1	14.9547	-36.7066	0.557296	9	n/a	307	.	.	.	.	.	.	.	.	.	.	KPC-like	.	.	.	.	.	.	.	.	.	.	blaKPC-2	.	.	.	.	.	.	.	.	.	.	.	.	.	.	.	.	IncA/C2/100/100/417	.	.	.	.
CP067687.1	14.9577	-36.703	0.556012	9	n/a	307	.	.	.	.	.	.	.	.	.	.	KPC-like	.	.	.	.	.	.	.	.	.	.	blaKPC-2	.	.	.	.	.	.	.	.	.	.	.	.	.	.	.	.	IncA/C2/100/100/417	.	.	.	.
CP067666.1	15.1584	-37.5896	0.955116	9	n/a	258	.	.	.	.	.	.	.	.	.	.	KPC-like	.	.	.	.	.	.	.	.	.	.	blaKPC-2	.	.	.	.	.	.	.	.	.	.	.	.	.	.	.	.	IncA/C2/100/100/417	.	.	.	.
CP066542.1	15.6027	-40.1422	0.881106	9	n/a	-	.	.	.	.	.	.	.	.	.	CTX-M-9-like	.	.	OXA-10-like	.	.	.	.	.	.	blaCTX-M-14	.	.	.	.	.	.	.	.	.	.	.	.	.	.	.	.	.	.	IncA/C2/100/100/417	.	.	.	.
CP065465.1	14.6225	-41.0126	1	9	n/a	11	.	.	.	.	.	.	.	.	.	CTX-M-9-like	.	.	.	.	.	.	.	.	.	blaCTX-M-14	.	.	.	.	.	.	.	.	.	.	.	.	.	.	.	.	.	.	IncA/C2/100/100/417	.	.	.	.
CP065463.1	14.5708	-40.88	0.672804	9	n/a	11	.	.	.	.	.	.	.	.	.	CTX-M-9-like	.	.	.	.	.	.	.	.	.	blaCTX-M-14	.	.	.	.	.	.	.	.	.	.	.	.	.	.	.	.	.	.	IncA/C2/100/100/417	.	.	.	.
CP065454.1	14.6941	-40.6746	0.759471	9	n/a	11	.	.	.	.	.	.	.	.	.	CTX-M-9-like	.	.	.	.	.	.	.	.	.	blaCTX-M-14	.	.	.	.	.	.	.	.	.	.	.	.	.	.	.	.	.	.	IncA/C2/100/100/417	.	.	.	.
CP065451.1	14.6799	-40.7667	0.713726	9	n/a	11	.	.	.	.	.	.	.	.	.	CTX-M-9-like	.	.	.	.	.	.	.	.	.	blaCTX-M-14	.	.	.	.	.	.	.	.	.	.	.	.	.	.	.	.	.	.	IncA/C2/100/100/417	.	.	.	.
CP065446.1	14.5715	-40.8774	0.673942	9	n/a	11	.	.	.	.	.	.	.	.	.	CTX-M-9-like	.	.	.	.	.	.	.	.	.	blaCTX-M-14	.	.	.	.	.	.	.	.	.	.	.	.	.	.	.	.	.	.	IncA/C2/100/100/417	.	.	.	.
CP065443.1	14.7516	-40.8469	0.66685	9	n/a	11	.	.	.	.	.	.	.	.	.	CTX-M-9-like	.	.	.	.	.	.	.	.	.	blaCTX-M-14	.	.	.	.	.	.	.	.	.	.	.	.	.	.	.	.	.	.	IncA/C2/100/100/417	.	.	.	.
CP065439.1	14.7794	-40.869	0.6538	9	n/a	11	.	.	.	.	.	.	.	.	.	CTX-M-9-like	.	.	.	.	.	.	.	.	.	blaCTX-M-14	.	.	.	.	.	.	.	.	.	.	.	.	.	.	.	.	.	.	IncA/C2/100/100/417	.	.	.	.
CP064854.1	16.4573	-39.1993	1	9	n/a	29	.	.	.	.	.	.	.	.	.	.	.	.	.	.	.	.	.	.	.	.	.	.	.	.	.	.	.	.	.	.	.	.	.	.	.	.	.	.	IncA/C2/100/100/417	.	.	.	.
CP061407.1	12.3735	-38.6856	0.618905	9	n/a	13	.	.	.	.	.	.	.	.	.	.	.	.	.	.	.	.	.	.	.	.	.	.	.	.	.	.	.	.	.	.	.	.	.	.	.	.	.	.	IncA/C2/100/100/417	.	.	.	.
CP054405.1	14.2905	-39.431	0.959562	9	n/a	1967	.	.	.	.	.	.	.	.	.	.	.	NDM-like	.	.	.	.	.	.	.	.	.	.	.	.	.	.	blaNDM-1	.	.	.	.	.	.	.	.	.	.	.	IncA/C2/100/100/417	.	.	.	.
CP054402.1	14.2943	-39.4286	0.963231	9	n/a	1967	.	.	.	.	.	.	.	.	.	.	.	NDM-like	.	.	.	.	.	.	.	.	.	.	.	.	.	.	blaNDM-1	.	.	.	.	.	.	.	.	.	.	.	IncA/C2/100/100/417	.	.	.	.
CP054399.1	14.2957	-39.4285	0.963917	9	n/a	1967	.	.	.	.	.	.	.	.	.	.	.	NDM-like	.	.	.	.	.	.	.	.	.	.	.	.	.	.	blaNDM-1	.	.	.	.	.	.	.	.	.	.	.	IncA/C2/100/100/417	.	.	.	.
CP054305.1	13.2939	-39.1954	0.728987	9	n/a	515	.	.	.	.	.	CTX-M-1-like	.	.	.	.	.	.	.	OXA-1-like	.	.	.	.	blaCTX-M-15	.	.	.	.	.	.	.	.	blaOXA-1	.	.	.	.	.	.	.	.	.	.	IncA/C2/100/100/417	.	.	.	.
CP053670.1	15.4813	-38.2633	1	9	n/a	37	.	.	.	.	.	.	.	.	.	.	.	NDM-like	.	.	.	.	.	.	.	.	.	.	.	.	.	.	blaNDM-1	.	.	.	.	.	.	.	.	.	.	.	IncA/C2/100/100/417	.	.	.	.
CP052444.1	14.7286	-40.7152	0.731832	9	n/a	48	.	.	.	.	.	.	.	.	.	CTX-M-9-like	.	.	.	.	.	.	.	.	.	blaCTX-M-14	.	.	.	.	.	.	.	.	.	.	.	.	.	.	.	.	.	.	IncA/C2/100/100/417	.	.	.	.
CP047703.1	16.698	-38.8901	0.907088	9	n/a	376	.	.	.	.	.	.	.	.	.	.	.	.	.	.	.	.	.	.	.	.	.	.	.	.	.	.	.	.	.	.	.	.	.	.	.	.	.	.	IncA/C2/100/100/417	.	.	.	.
CP047272.1	13.7871	-37.1974	0.696317	9	n/a	1454	.	.	.	.	.	.	.	.	.	.	.	.	.	.	.	OXA-48-like	.	.	.	.	.	.	.	.	.	.	.	.	.	.	.	.	.	.	.	.	.	.	IncA/C2/100/100/417	IncFIB(pB171)/100/91.45/643	IncFII(SARC14)/99.78/94.84/445	IncFII(S)/94.27/92.09/262	.
CP045016.1	12.2263	-38.2684	0.549835	9	n/a	16	.	.	.	.	.	.	.	.	.	.	.	.	.	.	.	.	OXA-9-like	.	.	.	.	.	.	.	.	.	.	.	.	.	.	blaOXA-9	.	.	.	.	.	.	IncA/C2/100/100/417	.	.	.	.
CP041641.1	13.919	-38.8979	0.935489	9	n/a	16	.	.	.	.	.	.	.	.	.	.	.	.	.	.	.	.	.	.	.	.	.	.	.	.	.	.	.	.	.	.	.	.	.	.	.	.	.	.	IncA/C2/100/100/417	.	.	.	.
CP041103.1	12.9243	-38.4027	0.791547	9	n/a	1	.	.	.	.	.	.	.	.	.	.	.	.	.	.	.	.	.	.	.	.	.	.	.	.	.	.	.	.	.	.	.	.	.	.	.	.	.	.	IncA/C2/100/100/417	.	.	.	.
CP041083.1	14.9694	-38.7907	1	9	n/a	101	.	.	.	.	.	CTX-M-1-like	.	.	.	.	.	NDM-like	OXA-10-like	.	.	.	.	.	blaCTX-M-15	.	.	.	.	.	.	.	blaNDM-1	.	.	.	.	.	.	.	.	.	.	.	IncA/C2/100/100/417	.	.	.	.
CP040039.1	14.5306	-40.3732	0.987772	9	n/a	11	.	.	.	.	.	.	.	.	.	.	.	.	.	.	.	.	.	.	.	.	.	.	.	.	.	.	.	.	.	.	.	.	.	.	.	.	.	.	IncA/C2/100/100/417	.	.	.	.
CP040034.1	14.6964	-40.672	0.760503	9	n/a	11	.	.	.	.	.	.	.	.	.	CTX-M-9-like	.	.	.	.	.	.	.	.	.	blaCTX-M-14	.	.	.	.	.	.	.	.	.	.	.	.	.	.	.	.	.	.	IncA/C2/100/100/417	.	.	.	.
CP040029.1	14.6963	-40.6721	0.76048	9	n/a	11	.	.	.	.	.	.	.	.	.	CTX-M-9-like	.	.	.	.	.	.	.	.	.	blaCTX-M-14	.	.	.	.	.	.	.	.	.	.	.	.	.	.	.	.	.	.	IncA/C2/100/100/417	.	.	.	.
CP040024.1	14.6758	-40.7398	0.727826	9	n/a	11	.	.	.	.	.	.	.	.	.	CTX-M-9-like	.	.	.	.	.	.	.	.	.	blaCTX-M-14	.	.	.	.	.	.	.	.	.	.	.	.	.	.	.	.	.	.	IncA/C2/100/100/417	.	.	.	.
CP036192.1	15.7942	-39.5077	0.908009	9	n/a	23	.	.	.	.	.	CTX-M-1-like	.	.	.	.	.	.	.	.	.	.	.	.	blaCTX-M-15	.	.	.	.	.	.	.	.	.	.	.	.	.	.	.	.	.	.	.	IncA/C2/100/100/417	.	.	.	.
CP035908.1	15.7936	-39.4949	0.916044	9	n/a	23	.	.	.	.	.	CTX-M-1-like	.	.	.	.	.	.	.	.	.	.	.	.	blaCTX-M-15	.	.	.	.	.	.	.	.	.	.	.	.	.	.	.	.	.	.	.	IncA/C2/99.76/100/417	.	.	.	.
CP032168.1	15.9308	-38.4227	0.981079	9	n/a	2938	.	.	.	.	.	.	.	.	.	.	.	.	.	.	.	.	.	.	.	.	.	.	.	.	.	.	.	.	.	.	.	.	.	.	.	.	.	.	IncA/C2/100/100/417	.	.	.	.
CP031802.1	13.7919	-38.4151	0.932429	9	n/a	231	.	.	.	.	.	CTX-M-1-like	.	.	.	.	.	.	OXA-10-like	.	.	.	.	.	blaCTX-M-15	.	.	.	.	.	.	.	.	.	.	.	.	.	.	.	.	.	.	.	IncA/C2/100/100/417	.	.	.	.
CP031584.1	15.9578	-38.5748	1	9	n/a	422	.	.	.	.	.	.	.	.	.	.	.	.	.	.	.	.	.	.	.	.	.	.	.	.	.	.	.	.	.	.	.	.	.	.	.	.	.	.	IncA/C2/100/100/417	.	.	.	.
CP031564.1	12.7592	-38.1549	0.706238	9	n/a	726	.	.	.	.	.	.	.	.	.	.	.	.	.	.	.	.	.	.	.	.	.	.	.	.	.	.	.	.	.	.	.	.	.	.	.	.	.	.	IncA/C2/100/100/417	.	.	.	.
CP030744.1	14.6993	-38.4829	1	9	n/a	274	.	.	.	.	.	.	.	.	.	.	.	NDM-like	OXA-10-like	.	.	.	.	.	.	.	.	.	.	.	.	.	blaNDM-1	.	.	.	.	.	.	.	.	.	.	.	IncA/C2/100/100/417	.	.	.	.
CP030736.1	14.6993	-38.4829	1	9	n/a	274	.	.	.	.	.	.	.	.	.	.	.	NDM-like	OXA-10-like	.	.	.	.	.	.	.	.	.	.	.	.	.	blaNDM-1	.	.	.	.	.	.	.	.	.	.	.	IncA/C2/100/100/417	.	.	.	.
CP030727.1	14.6993	-38.4829	1	9	n/a	274	.	.	.	.	.	.	.	.	.	.	.	NDM-like	OXA-10-like	.	.	.	.	.	.	.	.	.	.	.	.	.	blaNDM-1	.	.	.	.	.	.	.	.	.	.	.	IncA/C2/100/100/417	.	.	.	.
CP030720.1	14.7091	-38.5056	1	9	n/a	274	.	.	.	.	.	.	.	.	.	.	.	NDM-like	OXA-10-like	.	.	.	.	.	.	.	.	.	.	.	.	.	blaNDM-1	.	.	.	.	.	.	.	.	.	.	.	IncA/C2/100/100/417	.	.	.	.
CP030304.1	14.4412	-38.4388	0.992349	9	n/a	290	.	.	.	.	.	.	.	.	.	.	.	.	.	.	.	.	.	.	.	.	.	.	.	.	.	.	.	.	.	.	.	.	.	.	.	.	.	.	IncA/C2/100/100/417	.	.	.	.
CP030132.1	15.5801	-40.197	0.870073	9	n/a	11	.	.	.	.	.	.	.	.	.	CTX-M-9-like	.	.	OXA-10-like	.	.	.	.	.	.	blaCTX-M-14	.	.	.	.	.	.	.	.	.	.	.	.	.	.	.	.	.	.	IncA/C2/100/100/417	.	.	.	.
CP028996.1	14.6963	-40.6713	0.760928	9	n/a	11	.	.	.	.	.	.	.	.	.	CTX-M-9-like	.	.	.	.	.	.	.	.	.	blaCTX-M-14	.	.	.	.	.	.	.	.	.	.	.	.	.	.	.	.	.	.	IncA/C2/100/100/417	.	.	.	.
CP027695.1	14.7124	-40.7388	0.722597	9	n/a	258	.	.	.	.	.	.	.	.	.	CTX-M-9-like	.	.	.	.	.	.	.	.	.	blaCTX-M-14	.	.	.	.	.	.	.	.	.	.	.	.	.	.	.	.	.	.	IncA/C2/100/100/417	.	.	.	.
CP027055.1	14.9027	-39.2434	1	9	n/a	258	.	.	.	.	.	.	.	.	.	.	.	.	OXA-10-like	.	.	.	.	.	.	.	.	.	.	.	.	.	.	.	.	.	.	.	.	.	.	.	.	.	IncA/C2/100/100/417	.	.	.	.
CP027043.1	14.9089	-39.3397	1	9	n/a	147	.	.	.	.	.	.	.	.	.	.	.	.	OXA-10-like	.	.	.	.	.	.	.	.	.	.	.	.	.	.	.	.	.	.	.	.	.	.	.	.	.	IncA/C2/100/100/417	.	.	.	.
CP027038.1	14.6157	-39.5918	0.910865	9	n/a	11	.	.	.	.	.	.	.	.	.	.	.	.	OXA-10-like	.	.	.	.	.	.	.	.	.	.	.	.	.	.	.	.	.	.	.	.	.	.	.	.	.	IncA/C2/100/100/417	.	.	.	.
CP025470.1	13.9083	-41.1163	0.573439	9	n/a	11	.	.	.	.	.	.	.	.	.	.	.	.	.	.	.	.	.	.	.	.	.	.	.	.	.	.	.	.	.	.	.	.	.	.	.	.	.	.	IncA/C2/100/100/417	.	.	.	.
CP025147.1	15.1591	-37.5864	0.952498	9	n/a	307	.	.	.	.	.	.	.	.	.	.	KPC-like	.	.	.	.	.	.	.	.	.	.	blaKPC-2	.	.	.	.	.	.	.	.	.	.	.	.	.	.	.	.	IncA/C2/100/100/417	.	.	.	.
CP025144.1	15.1598	-37.591	0.955378	9	n/a	307	.	.	.	.	.	.	.	.	.	.	KPC-like	.	.	.	.	.	.	.	.	.	.	.	.	.	.	blaKPC-33	.	.	.	.	.	.	.	.	.	.	.	.	IncA/C2/100/100/417	.	.	.	.
CP025141.1	15.1595	-37.585	0.951252	9	n/a	307	.	.	.	.	.	.	.	.	.	.	KPC-like	.	.	.	.	.	.	.	.	.	.	blaKPC-2	.	.	.	.	.	.	.	.	.	.	.	.	.	.	.	.	IncA/C2/100/100/417	.	.	.	.
CP024571.1	15.9213	-37.6075	1	9	n/a	340	.	.	.	.	.	.	.	.	.	.	.	.	.	.	.	.	.	.	.	.	.	.	.	.	.	.	.	.	.	.	.	.	.	.	.	.	.	.	IncA/C2/100/100/417	.	.	.	.
CP024564.1	15.9213	-37.6075	1	9	n/a	340	.	.	.	.	.	.	.	.	.	.	.	.	.	.	.	.	.	.	.	.	.	.	.	.	.	.	.	.	.	.	.	.	.	.	.	.	.	.	IncA/C2/100/100/417	.	.	.	.
CP024557.1	15.8295	-37.7575	0.877056	9	n/a	340	.	.	.	.	.	.	.	.	.	.	.	.	.	.	.	.	.	.	.	.	.	.	.	.	.	.	.	.	.	.	.	.	.	.	.	.	.	.	IncA/C2/100/100/417	.	.	.	.
CP024550.1	15.9213	-37.6076	1	9	n/a	340	.	.	.	.	.	.	.	.	.	.	.	.	.	.	.	.	.	.	.	.	.	.	.	.	.	.	.	.	.	.	.	.	.	.	.	.	.	.	IncA/C2/100/100/417	.	.	.	.
CP024536.1	15.8483	-37.6772	0.845202	9	n/a	340	.	.	.	.	.	.	.	.	.	.	.	.	.	.	.	.	.	.	.	.	.	.	.	.	.	.	.	.	.	.	.	.	.	.	.	.	.	.	IncA/C2/100/100/417	.	.	.	.
CP024529.1	15.923	-37.6391	1	9	n/a	340	.	.	.	.	.	.	.	.	.	.	.	.	.	.	.	.	.	.	.	.	.	.	.	.	.	.	.	.	.	.	.	.	.	.	.	.	.	.	IncA/C2/100/100/417	.	.	.	.
CP024522.1	15.923	-37.6392	1	9	n/a	340	.	.	.	.	.	.	.	.	.	.	.	.	.	.	.	.	.	.	.	.	.	.	.	.	.	.	.	.	.	.	.	.	.	.	.	.	.	.	IncA/C2/100/100/417	.	.	.	.
CP024192.1	15.8395	-37.7603	0.879922	9	n/a	340	.	.	.	.	.	.	.	.	.	.	.	.	.	.	.	.	.	.	.	.	.	.	.	.	.	.	.	.	.	.	.	.	.	.	.	.	.	.	IncA/C2/100/100/417	.	.	.	.
CP023724.1	14.5246	-40.451	0.947518	9	n/a	11	.	.	.	.	.	.	.	.	.	.	.	.	.	.	.	.	.	.	.	.	.	.	.	.	.	.	.	.	.	.	.	.	.	.	.	.	.	.	IncA/C2/100/100/417	.	.	.	.
CP022126.1	17.1294	-39.0073	0.698307	9	n/a	15	.	.	.	.	.	.	.	.	.	.	.	NDM-like	.	.	.	.	.	.	.	.	.	.	.	.	.	.	blaNDM-1	.	.	.	.	.	.	.	.	.	.	.	IncA/C2/100/100/417	.	.	.	.
CP021956.1	14.7873	-39.5085	0.945711	9	n/a	1161	.	.	.	.	.	.	.	CTX-M-2-like	.	.	.	.	OXA-10-like	.	.	.	OXA-9-like	.	.	.	.	.	.	.	.	.	.	.	.	.	.	blaOXA-9	.	.	.	.	.	.	IncA/C2/100/100/417	.	.	.	.
CP021952.1	17.4106	-39.0077	0.587987	9	n/a	11	.	.	.	.	.	.	.	.	.	.	.	NDM-like	.	.	.	.	.	SHV-like	.	.	.	.	.	.	.	.	blaNDM-1	.	.	.	.	.	.	.	.	.	blaSHV-11	.	IncFIA(HI1)/99.74/98.45/388	IncA/C2/100/100/417	.	.	.
CP021835.1	15.1342	-37.589	0.968937	9	n/a	258	.	.	.	.	.	.	.	.	.	.	KPC-like	.	.	.	.	.	.	.	.	.	.	blaKPC-2	.	.	.	.	.	.	.	.	.	.	.	.	.	.	.	.	IncA/C2/100/100/417	.	.	.	.
CP021709.1	16.3146	-38.9849	0.983163	9	n/a	14	.	.	.	.	.	.	.	.	.	.	.	NDM-like	.	.	.	.	.	.	.	.	.	.	.	.	.	.	blaNDM-1	.	.	.	.	.	.	.	.	.	.	.	IncA/C2/100/100/417	.	.	.	.
CP018817.1	17.1536	-38.9921	0.684854	9	n/a	11	.	.	.	.	.	.	.	.	.	.	.	NDM-like	.	.	.	.	.	.	.	.	.	.	.	.	.	.	blaNDM-1	.	.	.	.	.	.	.	.	.	.	.	IncA/C2/100/100/417	.	.	.	.
CP018722.1	13.0929	-37.8486	0.743556	9	n/a	147	.	.	.	.	.	.	.	.	.	.	.	.	.	.	.	.	.	.	.	.	.	.	.	.	.	.	.	.	.	.	.	.	.	.	.	.	.	.	IncA/C2/100/100/417	.	.	.	.
CP018716.1	13.0927	-37.8468	0.742703	9	n/a	147	.	.	.	.	.	.	.	.	.	.	.	.	.	.	.	.	.	.	.	.	.	.	.	.	.	.	.	.	.	.	.	.	.	.	.	.	.	.	IncA/C2/100/100/417	.	.	.	.
CP018710.1	13.0929	-37.8486	0.743556	9	n/a	147	.	.	.	.	.	.	.	.	.	.	.	.	.	.	.	.	.	.	.	.	.	.	.	.	.	.	.	.	.	.	.	.	.	.	.	.	.	.	IncA/C2/100/100/417	.	.	.	.
CP018704.1	13.092	-37.8469	0.742492	9	n/a	147	.	.	.	.	.	.	.	.	.	.	.	.	.	.	.	.	.	.	.	.	.	.	.	.	.	.	.	.	.	.	.	.	.	.	.	.	.	.	IncA/C2/100/100/417	.	.	.	.
CP018698.1	13.0929	-37.8482	0.743362	9	n/a	147	.	.	.	.	.	.	.	.	.	.	.	.	.	.	.	.	.	.	.	.	.	.	.	.	.	.	.	.	.	.	.	.	.	.	.	.	.	.	IncA/C2/100/100/417	.	.	.	.
CP018689.1	13.0924	-37.8414	0.740229	9	n/a	147	.	.	.	.	.	.	.	.	.	.	.	.	.	.	.	.	.	.	.	.	.	.	.	.	.	.	.	.	.	.	.	.	.	.	.	.	.	.	IncA/C2/100/100/417	.	.	.	.
CP018318.1	13.0923	-37.847	0.742649	9	n/a	147	.	.	.	.	.	.	.	.	.	.	.	.	.	.	.	.	.	.	.	.	.	.	.	.	.	.	.	.	.	.	.	.	.	.	.	.	.	.	IncA/C2/100/100/417	.	.	.	.
CP017987.1	12.9963	-37.5999	0.63462	9	n/a	147	.	.	.	.	.	.	.	.	.	.	.	.	.	.	.	OXA-48-like	.	.	.	.	.	.	.	.	.	.	.	.	.	.	.	.	.	.	.	.	.	.	IncA/C2/100/100/417	.	.	.	.
CP015394.1	15.5907	-38.7145	1	9	n/a	258	.	.	.	.	.	.	.	CTX-M-2-like	.	.	.	.	.	.	OXA-2-like	.	.	.	.	.	.	.	.	.	.	.	.	.	blaOXA-2	.	.	.	.	.	.	.	.	.	IncA/C2/100/100/417	.	.	.	.
CP014295.1	13.3943	-39.6275	0.680169	9	n/a	11	.	.	.	.	.	.	.	.	.	.	.	.	.	.	.	.	.	.	.	.	.	.	.	.	.	.	.	.	.	.	.	.	.	.	.	.	.	.	IncA/C2/100/100/417	.	.	.	.
CP013324.1	16.5772	-39.8349	0.719577	9	n/a	941	.	.	.	.	.	.	.	.	.	.	.	.	.	.	.	.	OXA-9-like	SHV-like	.	.	.	.	.	.	.	.	.	.	.	.	.	blaOXA-9	.	.	.	blaSHV-7	.	.	IncA/C2/100/100/417	.	.	.	.
CP011622.1	16.5873	-39.8526	0.711734	9	n/a	941	.	.	.	.	.	.	.	.	.	.	KPC-like	.	.	.	.	.	OXA-9-like	SHV-like	.	.	.	blaKPC-2	.	.	.	.	.	.	.	.	.	blaOXA-9	.	.	.	blaSHV-7	.	.	IncA/C2/100/100/417	.	.	.	.
CP007732.1	15.6437	-37.039	0.622452	9	n/a	34	.	.	.	.	.	.	.	.	.	.	KPC-like	.	.	.	.	.	.	SHV-like	.	.	.	blaKPC-2	.	.	.	.	.	.	.	.	.	.	.	.	blaSHV-5	.	.	.	IncA/C2/100/100/417	IncN/100/99.81/514	.	.	.
CP006661.1	17.154	-38.9921	0.684632	9	n/a	11	.	.	.	.	.	.	.	.	.	.	.	NDM-like	.	.	.	.	.	.	.	.	.	.	.	.	.	.	blaNDM-1	.	.	.	.	.	.	.	.	.	.	.	IncA/C2/100/100/417	.	.	.	.
CP003998.1	12.2479	-38.7552	0.59204	9	n/a	442	.	.	.	.	.	.	.	.	.	.	.	.	.	.	.	.	.	.	.	.	.	.	.	.	.	.	.	.	.	.	.	.	.	.	.	.	.	.	IncA/C2/100/100/417	.	.	.	.
CP003225.1	13.9439	-41.1123	0.577395	9	n/a	11	.	.	.	.	.	.	.	.	.	CTX-M-9-like	.	.	.	.	.	.	.	.	.	blaCTX-M-14	.	.	.	.	.	.	.	.	.	.	.	.	.	.	.	.	.	.	IncA/C2/100/100/417	.	.	.	.
AP026526.1	15.0006	-38.3572	1	9	n/a	1873	.	.	.	.	.	.	CTX-M-25-like	.	.	.	.	.	.	.	OXA-2-like	.	.	.	.	.	.	.	.	.	.	.	.	.	.	.	.	.	.	.	.	.	.	.	IncQ1/66.46/100/796	IncA/C2/100/100/417	.	.	.
AP022080.1	15.1467	-38.5029	1	9	n/a	29	.	.	.	.	.	.	.	.	.	.	.	.	OXA-10-like	.	.	.	.	.	.	.	.	.	.	.	.	.	.	.	.	.	.	.	.	.	.	.	.	.	IncA/C2/100/100/417	.	.	.	.
AP018672.1	14.5261	-40.4547	0.943948	9	n/a	11	.	.	.	.	.	.	.	.	.	.	.	.	.	.	.	.	.	.	.	.	.	.	.	.	.	.	.	.	.	.	.	.	.	.	.	.	.	.	IncA/C2/100/100/417	.	.	.	.
908343_p5	-11.187	-18.6833	1	10	Georgia	23	.	.	.	.	.	.	.	.	.	.	.	.	.	.	.	OXA-48-like	.	.	.	.	.	.	.	.	.	.	.	.	.	.	.	.	.	.	.	.	.	.	IncL/M(pOXA-48)/87.75/100/661	.	.	.	.
908271_p4	-11.187	-18.6833	1	10	Georgia	23	.	.	.	.	.	.	.	.	.	.	.	.	.	.	.	OXA-48-like	.	.	.	.	.	.	.	.	.	.	.	.	.	.	.	.	.	.	.	.	.	.	IncL/M(pOXA-48)/87.75/100/661	.	.	.	.
908247_p2	-8.30273	-19.6966	1	10	Georgia	395	.	.	.	.	.	.	.	.	.	.	.	.	.	.	.	OXA-48-like	.	.	.	.	.	.	.	.	.	.	.	.	.	.	.	.	.	.	.	.	.	.	IncL/M/87.8/100/664	.	.	.	.
803958_p3	-8.05987	-19.4498	0.41608	10	Georgia	395	.	.	.	.	.	.	.	.	.	.	.	.	.	.	.	OXA-48-like	.	.	.	.	.	.	.	.	.	.	.	.	.	.	.	.	.	.	.	.	.	.	IncL/M/87.8/100/664	.	.	.	.
102622_p2	-8.30273	-19.6966	1	10	Georgia	395	.	.	.	.	.	.	.	.	.	.	.	.	.	.	.	OXA-48-like	.	.	.	.	.	.	.	.	.	.	.	.	.	.	.	.	.	.	.	.	.	.	IncL/M/87.8/100/664	.	.	.	.
1005637_p2	-11.1896	-18.6949	1	10	Georgia	395	.	.	.	.	.	.	.	.	.	.	.	.	.	.	.	OXA-48-like	.	.	.	.	.	.	.	.	.	.	.	.	.	.	.	.	.	.	.	.	.	.	IncL/M(pOXA-48)/87.75/100/661	.	.	.	.
1005401_p2	-8.47088	-19.6666	0.465732	10	Georgia	395	.	.	.	.	.	.	.	.	.	.	.	.	.	.	.	OXA-48-like	.	.	.	.	.	.	.	.	.	.	.	.	.	.	.	.	.	.	.	.	.	.	IncL/M/87.8/100/664	.	.	.	.
1004755_p3	-12.2244	-18.734	0.916981	10	Georgia	15	.	.	.	.	.	.	.	.	.	.	.	.	.	.	.	OXA-48-like	.	.	.	.	.	.	.	.	.	.	.	.	.	.	.	.	.	.	.	.	.	.	IncL/M(pOXA-48)/87.75/99.83/661	.	.	.	.
489775_p3	-11.7528	-17.6746	1	10	Ukraine	392	.	.	.	.	.	.	.	.	.	.	.	.	.	.	.	OXA-48-like	.	.	.	.	.	.	.	.	.	.	.	.	.	blaOXA-48	.	.	.	.	.	.	.	.	IncL/M(pOXA-48)/87.75/100/661	.	.	.	.
OX030751.1	-11.6057	-19.3304	0.863708	10	n/a	307	.	.	.	.	.	.	.	.	.	.	.	.	.	.	.	.	.	.	.	.	.	.	.	.	.	.	.	.	.	.	.	.	.	.	.	.	.	.	IncL/M(pOXA-48)/89.56/100/661	.	.	.	.
OX030721.1	-11.1563	-18.5272	1	10	n/a	307	.	.	.	.	.	.	.	.	.	.	.	.	.	.	.	OXA-48-like	.	.	.	.	.	.	.	.	.	.	.	.	.	.	.	.	.	.	.	.	.	.	IncL/M(pOXA-48)/89.56/100/661	.	.	.	.
OX030711.1	-11.1563	-18.5272	1	10	n/a	307	.	.	.	.	.	.	.	.	.	.	.	.	.	.	.	OXA-48-like	.	.	.	.	.	.	.	.	.	.	.	.	.	.	.	.	.	.	.	.	.	.	IncL/M(pOXA-48)/89.56/100/661	.	.	.	.
OX030690.1	-11.5802	-17.6547	1	10	n/a	392	.	.	.	.	.	.	.	.	.	.	.	.	.	.	.	OXA-48-like	.	.	.	.	.	.	.	.	.	.	.	.	.	.	.	.	.	.	.	.	.	.	IncL/M(pOXA-48)/89.56/100/661	.	.	.	.
OW995948.1	-11.2988	-18.9893	1	10	n/a	326	.	.	.	.	.	.	.	.	.	.	.	.	.	.	.	OXA-48-like	.	.	.	.	.	.	.	.	.	.	.	.	.	.	.	.	.	.	.	.	.	.	IncL/M(pOXA-48)/89.56/99.83/661	.	.	.	.
OW970563.1	-11.1563	-18.5274	1	10	n/a	147	.	.	.	.	.	.	.	.	.	.	.	.	.	.	.	OXA-48-like	.	.	.	.	.	.	.	.	.	.	.	.	.	.	.	.	.	.	.	.	.	.	IncL/M(pOXA-48)/89.56/100/661	.	.	.	.
OW970556.1	-11.1563	-18.5274	1	10	n/a	147	.	.	.	.	.	.	.	.	.	.	.	.	.	.	.	OXA-48-like	.	.	.	.	.	.	.	.	.	.	.	.	.	.	.	.	.	.	.	.	.	.	IncL/M(pOXA-48)/89.56/100/661	.	.	.	.
OW970543.1	-11.1563	-18.5274	1	10	n/a	147	.	.	.	.	.	.	.	.	.	.	.	.	.	.	.	OXA-48-like	.	.	.	.	.	.	.	.	.	.	.	.	.	.	.	.	.	.	.	.	.	.	IncL/M(pOXA-48)/89.56/100/661	.	.	.	.
OW970532.1	-11.1563	-18.5274	1	10	n/a	147	.	.	.	.	.	.	.	.	.	.	.	.	.	.	.	OXA-48-like	.	.	.	.	.	.	.	.	.	.	.	.	.	.	.	.	.	.	.	.	.	.	IncL/M(pOXA-48)/89.56/100/661	.	.	.	.
OW970518.1	-13.3686	-18.4561	1	10	n/a	147	.	.	.	.	.	.	.	.	.	.	.	.	.	.	.	OXA-48-like	.	.	.	.	.	.	.	.	.	.	.	.	.	.	.	.	.	.	.	.	.	.	IncL/M(pOXA-48)/89.56/100/661	.	.	.	.
OW970495.1	-11.1563	-18.5274	1	10	n/a	147	.	.	.	.	.	.	.	.	.	.	.	.	.	.	.	OXA-48-like	.	.	.	.	.	.	.	.	.	.	.	.	.	.	.	.	.	.	.	.	.	.	IncL/M(pOXA-48)/89.56/100/661	.	.	.	.
OW970482.1	-13.2225	-18.4802	0.576526	10	n/a	147	.	.	.	.	.	.	.	.	.	.	.	.	.	.	.	OXA-48-like	.	.	.	.	.	.	.	.	.	.	.	.	.	.	.	.	.	.	.	.	.	.	IncL/M(pOXA-48)/89.56/100/661	.	.	.	.
OW970454.1	-11.1545	-18.5231	1	10	n/a	147	.	.	.	.	.	.	.	.	.	.	.	.	.	.	.	OXA-48-like	.	.	.	.	.	.	.	.	.	.	.	.	.	.	.	.	.	.	.	.	.	.	IncL/M(pOXA-48)/89.56/100/661	.	.	.	.
OW970439.1	-11.1563	-18.5274	1	10	n/a	147	.	.	.	.	.	.	.	.	.	.	.	.	.	.	.	OXA-48-like	.	.	.	.	.	.	.	.	.	.	.	.	.	.	.	.	.	.	.	.	.	.	IncL/M(pOXA-48)/89.56/100/661	.	.	.	.
OW970424.1	-11.1563	-18.5274	1	10	n/a	147	.	.	.	.	.	.	.	.	.	.	.	.	.	.	.	OXA-48-like	.	.	.	.	.	.	.	.	.	.	.	.	.	.	.	.	.	.	.	.	.	.	IncL/M(pOXA-48)/89.56/100/661	.	.	.	.
OW970416.1	-11.1563	-18.5274	1	10	n/a	147	.	.	.	.	.	.	.	.	.	.	.	.	.	.	.	OXA-48-like	.	.	.	.	.	.	.	.	.	.	.	.	.	.	.	.	.	.	.	.	.	.	IncL/M(pOXA-48)/89.56/100/661	.	.	.	.
OW970368.1	-11.1563	-18.5274	1	10	n/a	147	.	.	.	.	.	.	.	.	.	.	.	.	.	.	.	OXA-48-like	.	.	.	.	.	.	.	.	.	.	.	.	.	.	.	.	.	.	.	.	.	.	IncL/M(pOXA-48)/89.56/100/661	.	.	.	.
OW970360.1	-11.1563	-18.5274	1	10	n/a	147	.	.	.	.	.	.	.	.	.	.	.	.	.	.	.	OXA-48-like	.	.	.	.	.	.	.	.	.	.	.	.	.	.	.	.	.	.	.	.	.	.	IncL/M(pOXA-48)/89.56/100/661	.	.	.	.
OW970156.1	-11.15	-18.4485	1	10	n/a	11	.	.	.	.	.	.	.	.	.	.	.	.	.	.	.	OXA-48-like	.	.	.	.	.	.	.	.	.	.	.	.	.	.	.	.	.	.	.	.	.	.	IncL/M(pOXA-48)/89.56/100/661	.	.	.	.
OW970026.1	-12.413	-19.0207	0.840915	10	n/a	147	.	.	.	.	.	.	.	.	.	.	.	.	.	.	.	OXA-48-like	.	.	.	.	.	.	.	.	.	.	.	.	.	.	.	.	.	.	.	.	.	.	IncL/M(pOXA-48)/89.56/99.83/661	.	.	.	.
OW969949.1	-11.2575	-17.3642	0.683656	10	n/a	15	.	.	.	.	.	.	.	.	.	.	.	.	.	.	.	OXA-48-like	.	.	.	.	.	.	.	.	.	.	.	.	.	.	.	.	.	.	.	.	.	.	IncL/M(pOXA-48)/89.56/100/661	.	.	.	.
OW969940.1	-11.5862	-17.4851	1	10	n/a	11	.	.	.	.	.	.	.	.	.	.	.	.	.	.	.	OXA-48-like	.	.	.	.	.	.	.	.	.	.	.	.	.	.	.	.	.	.	.	.	.	.	IncL/M(pOXA-48)/89.56/100/661	.	.	.	.
OW969872.1	-11.15	-18.4485	1	10	n/a	405	.	.	.	.	.	.	.	.	.	.	.	.	.	.	.	OXA-48-like	.	.	.	.	.	.	.	.	.	.	.	.	.	.	.	.	.	.	.	.	.	.	IncL/M(pOXA-48)/89.56/100/661	.	.	.	.
OW969842.1	-11.1563	-18.5272	1	10	n/a	307	.	.	.	.	.	.	.	.	.	.	.	.	.	.	.	OXA-48-like	.	.	.	.	.	.	.	.	.	.	.	.	.	.	.	.	.	.	.	.	.	.	IncL/M(pOXA-48)/89.56/100/661	.	.	.	.
OW969836.1	-11.5829	-17.4852	1	10	n/a	15	.	.	.	.	.	.	.	.	.	.	.	.	.	.	.	OXA-48-like	.	.	.	.	.	.	.	.	.	.	.	.	.	.	.	.	.	.	.	.	.	.	IncL/M(pOXA-48)/89.56/100/661	.	.	.	.
OW969832.1	-13.1034	-17.6625	0.539682	10	n/a	392	.	.	.	.	.	.	.	.	.	.	.	.	.	.	.	OXA-48-like	.	.	.	.	.	.	.	.	.	.	.	.	.	.	.	.	.	.	.	.	.	.	IncL/M(pOXA-48)/89.56/100/661	.	.	.	.
OW969829.1	-12.0258	-18.6171	1	10	n/a	4387	.	.	.	.	.	.	.	.	.	.	.	.	.	.	.	OXA-48-like	.	.	.	.	.	.	.	.	.	.	.	.	.	.	.	.	.	.	.	.	.	.	IncL/M(pOXA-48)/89.56/99.83/661	.	.	.	.
OW969804.1	-11.5829	-17.4852	1	10	n/a	551	.	.	.	.	.	.	.	.	.	.	.	.	.	.	.	OXA-48-like	.	.	.	.	.	.	.	.	.	.	.	.	.	.	.	.	.	.	.	.	.	.	IncL/M(pOXA-48)/89.56/100/661	.	.	.	.
OW969800.1	-11.2991	-18.9895	1	10	n/a	147	.	.	.	.	.	.	.	.	.	.	.	.	.	.	.	OXA-48-like	.	.	.	.	.	.	.	.	.	.	.	.	.	.	.	.	.	.	.	.	.	.	IncL/M(pOXA-48)/89.56/99.83/661	.	.	.	.
OW969775.1	-11.5862	-17.4853	1	10	n/a	147	.	.	.	.	.	.	.	.	.	.	.	.	.	.	.	OXA-48-like	.	.	.	.	.	.	.	.	.	.	.	.	.	.	.	.	.	.	.	.	.	.	IncL/M(pOXA-48)/89.56/100/661	.	.	.	.
OW969770.1	-11.5862	-17.4854	1	10	n/a	307	.	.	.	.	.	.	.	.	.	.	.	.	.	.	.	OXA-48-like	.	.	.	.	.	.	.	.	.	.	.	.	.	.	.	.	.	.	.	.	.	.	IncL/M(pOXA-48)/89.56/100/661	.	.	.	.
OW969767.1	-11.5825	-17.4852	1	10	n/a	15	.	.	.	.	.	.	.	.	.	.	.	.	.	.	.	OXA-48-like	.	.	.	.	.	.	.	.	.	.	.	.	.	.	.	.	.	.	.	.	.	.	IncL/M(pOXA-48)/89.56/100/661	.	.	.	.
OW969764.1	-11.5829	-17.4852	1	10	n/a	405	.	.	.	.	.	.	.	.	.	.	.	.	.	.	.	OXA-48-like	.	.	.	.	.	.	.	.	.	.	.	.	.	.	.	.	.	.	.	.	.	.	IncL/M(pOXA-48)/89.56/100/661	.	.	.	.
OW969758.1	-10.6473	-18.6951	0.775787	10	n/a	326	.	.	.	.	.	.	.	.	.	.	.	.	.	.	.	OXA-48-like	.	.	.	.	.	.	.	.	.	.	.	.	.	.	.	.	.	.	.	.	.	.	IncL/M(pOXA-48)/89.56/99.83/661	.	.	.	.
OW969748.1	-11.15	-18.4485	1	10	n/a	392	.	.	.	.	.	.	.	.	.	.	.	.	.	.	.	OXA-48-like	.	.	.	.	.	.	.	.	.	.	.	.	.	.	.	.	.	.	.	.	.	.	IncL/M(pOXA-48)/89.56/100/661	.	.	.	.
OW969743.1	-11.5962	-17.5668	0.775899	10	n/a	15	.	.	.	.	.	.	.	.	.	.	.	.	.	.	.	OXA-48-like	.	.	.	.	.	.	.	.	.	.	.	.	.	.	.	.	.	.	.	.	.	.	IncL/M(pOXA-48)/89.56/100/661	.	.	.	.
OW969735.1	-11.5829	-17.4852	1	10	n/a	15	.	.	.	.	.	.	.	.	.	.	.	.	.	.	.	OXA-48-like	.	.	.	.	.	.	.	.	.	.	.	.	.	.	.	.	.	.	.	.	.	.	IncL/M(pOXA-48)/89.56/100/661	.	.	.	.
OW969731.1	-11.5698	-17.6536	1	10	n/a	11	.	.	.	.	.	.	.	.	.	.	.	.	.	.	.	OXA-48-like	.	.	.	.	.	.	.	.	.	.	.	.	.	.	.	.	.	.	.	.	.	.	IncL/M(pOXA-48)/89.56/100/661	.	.	.	.
OW969705.1	-11.5862	-17.4854	1	10	n/a	307	.	.	.	.	.	.	.	.	.	.	.	.	.	.	.	OXA-48-like	.	.	.	.	.	.	.	.	.	.	.	.	.	.	.	.	.	.	.	.	.	.	IncL/M(pOXA-48)/89.56/100/661	.	.	.	.
OW969697.1	-11.6794	-18.5834	1	10	n/a	15	.	.	.	.	.	.	.	.	.	.	.	.	.	.	.	OXA-48-like	.	.	.	.	.	.	.	.	.	.	.	.	.	.	.	.	.	.	.	.	.	.	IncL/M(pOXA-48)/89.56/100/661	.	.	.	.
OW969680.1	-12.7143	-17.5922	0.616492	10	n/a	11	.	.	.	.	.	.	.	.	.	.	.	.	.	.	.	OXA-48-like	.	.	.	.	.	.	.	.	.	.	.	.	.	.	.	.	.	.	.	.	.	.	IncL/M(pOXA-48)/89.56/100/661	.	.	.	.
OW969658.1	-11.5729	-17.6539	1	10	n/a	5001	.	.	.	.	.	.	.	.	.	.	.	.	.	.	.	OXA-48-like	.	.	.	.	.	.	.	.	.	.	.	.	.	.	.	.	.	.	.	.	.	.	IncL/M(pOXA-48)/89.56/100/661	.	.	.	.
OW969646.1	-9.7214	-19.4916	0.499661	10	n/a	11	.	.	.	.	.	CTX-M-1-like	.	.	.	.	.	.	.	OXA-1-like	.	.	.	.	blaCTX-M-15	.	.	.	.	.	.	.	.	blaOXA-1	.	.	.	.	.	.	.	.	.	.	IncL/M(pOXA-48)/89.56/100/661	.	.	.	.
OW969640.1	-11.5802	-17.6547	1	10	n/a	392	.	.	.	.	.	.	.	.	.	.	.	.	.	.	.	OXA-48-like	.	.	.	.	.	.	.	.	.	.	.	.	.	.	.	.	.	.	.	.	.	.	IncL/M(pOXA-48)/89.56/100/661	.	.	.	.
OW969637.1	-11.5802	-17.6547	1	10	n/a	392	.	.	.	.	.	.	.	.	.	.	.	.	.	.	.	OXA-48-like	.	.	.	.	.	.	.	.	.	.	.	.	.	.	.	.	.	.	.	.	.	.	IncL/M(pOXA-48)/89.56/100/661	.	.	.	.
OW969595.1	-11.583	-17.6551	1	10	n/a	15	.	.	.	.	.	.	.	.	.	.	.	.	.	.	.	OXA-48-like	.	.	.	.	.	.	.	.	.	.	.	.	.	.	.	.	.	.	.	.	.	.	IncL/M(pOXA-48)/89.56/100/661	.	.	.	.
OW968461.1	-14.1172	-19.0475	0.353725	10	n/a	307	.	.	.	.	.	.	.	.	.	.	.	.	.	.	.	.	.	.	.	.	.	.	.	.	.	.	.	.	.	.	.	.	.	.	.	.	.	.	IncL/M(pOXA-48)/89.56/100/661	.	.	.	.
OW968437.1	-11.1564	-18.5271	1	10	n/a	307	.	.	.	.	.	.	.	.	.	.	.	.	.	.	.	OXA-48-like	.	.	.	.	.	.	.	.	.	.	.	.	.	.	.	.	.	.	.	.	.	.	IncL/M(pOXA-48)/89.56/100/661	.	.	.	.
OW968427.1	-13.2577	-18.4909	0.560545	10	n/a	13	.	.	.	.	.	.	.	.	.	.	.	.	.	.	.	OXA-48-like	.	.	.	.	.	.	.	.	.	.	.	.	.	.	.	.	.	.	.	.	.	.	IncL/M(pOXA-48)/89.56/100/661	.	.	.	.
OW968385.1	-11.6881	-17.662	1	10	n/a	11	.	.	.	.	.	.	.	.	.	.	.	.	.	.	.	OXA-48-like	.	.	.	.	.	.	.	.	.	.	.	.	.	.	.	.	.	.	.	.	.	.	IncL/M(pOXA-48)/89.56/100/661	.	.	.	.
OW968376.1	-11.1563	-18.5272	1	10	n/a	307	.	.	.	.	.	.	.	.	.	.	.	.	.	.	.	OXA-48-like	.	.	.	.	.	.	.	.	.	.	.	.	.	.	.	.	.	.	.	.	.	.	IncL/M(pOXA-48)/89.56/100/661	.	.	.	.
OW968367.1	-11.1563	-18.5272	1	10	n/a	307	.	.	.	.	.	.	.	.	.	.	.	.	.	.	.	OXA-48-like	.	.	.	.	.	.	.	.	.	.	.	.	.	.	.	.	.	.	.	.	.	.	IncL/M(pOXA-48)/89.56/100/661	.	.	.	.
OW968352.1	-11.5698	-17.6536	1	10	n/a	307	.	.	.	.	.	.	.	.	.	.	.	.	.	.	.	OXA-48-like	.	.	.	.	.	.	.	.	.	.	.	.	.	.	.	.	.	.	.	.	.	.	IncL/M(pOXA-48)/89.56/100/661	.	.	.	.
OW968320.1	-11.1564	-18.5271	1	10	n/a	15	.	.	.	.	.	.	.	.	.	.	.	.	.	.	.	OXA-48-like	.	.	.	.	.	.	.	.	.	.	.	.	.	.	.	.	.	.	.	.	.	.	IncL/M(pOXA-48)/89.56/100/661	.	.	.	.
OW968285.1	-12.2771	-19.1903	0.922427	10	n/a	405	.	.	.	.	.	.	.	.	.	.	.	.	.	.	.	OXA-48-like	.	.	.	.	.	.	.	.	.	.	.	.	.	.	.	.	.	.	.	.	.	.	IncL/M(pOXA-48)/89.56/100/661	.	.	.	.
OW968269.1	-11.1563	-18.5272	1	10	n/a	307	.	.	.	.	.	.	.	.	.	.	.	.	.	.	.	OXA-48-like	.	.	.	.	.	.	.	.	.	.	.	.	.	.	.	.	.	.	.	.	.	.	IncL/M(pOXA-48)/89.56/100/661	.	.	.	.
OW968262.1	-11.1564	-18.5271	1	10	n/a	307	.	.	.	.	.	.	.	.	.	.	.	.	.	.	.	OXA-48-like	.	.	.	.	.	.	.	.	.	.	.	.	.	.	.	.	.	.	.	.	.	.	IncL/M(pOXA-48)/89.56/100/661	.	.	.	.
OW968255.1	-11.1563	-18.5272	1	10	n/a	15	.	.	.	.	.	.	.	.	.	.	.	.	.	.	.	OXA-48-like	.	.	.	.	.	.	.	.	.	.	.	.	.	.	.	.	.	.	.	.	.	.	IncL/M(pOXA-48)/89.56/100/661	.	.	.	.
OW968236.1	-11.5802	-17.6547	1	10	n/a	392	.	.	.	.	.	.	.	.	.	.	.	.	.	.	.	OXA-48-like	.	.	.	.	.	.	.	.	.	.	.	.	.	.	.	.	.	.	.	.	.	.	IncL/M(pOXA-48)/89.56/100/661	.	.	.	.
OW968227.1	-12.0721	-19.2542	0.964137	10	n/a	307	.	.	.	.	.	.	.	.	.	.	.	.	.	.	.	OXA-48-like	.	.	.	.	.	.	.	.	.	.	.	.	.	.	.	.	.	.	.	.	.	.	IncL/M(pOXA-48)/89.56/99.83/661	.	.	.	.
OW968218.1	-11.1563	-18.5272	1	10	n/a	5002	.	.	.	.	.	.	.	.	.	.	.	.	.	.	.	OXA-48-like	.	.	.	.	.	.	.	.	.	.	.	.	.	.	.	.	.	.	.	.	.	.	IncL/M(pOXA-48)/89.56/100/661	.	.	.	.
OW968206.1	-11.1564	-18.5271	1	10	n/a	307	.	.	.	.	.	.	.	.	.	.	.	.	.	.	.	OXA-48-like	.	.	.	.	.	.	.	.	.	.	.	.	.	.	.	.	.	.	.	.	.	.	IncL/M(pOXA-48)/89.56/100/661	.	.	.	.
OW968122.1	-11.1563	-18.5272	1	10	n/a	307	.	.	.	.	.	.	.	.	.	.	.	.	.	.	.	OXA-48-like	.	.	.	.	.	.	.	.	.	.	.	.	.	.	.	.	.	.	.	.	.	.	IncL/M(pOXA-48)/89.56/100/661	.	.	.	.
OW968093.1	-11.5698	-17.6536	1	10	n/a	11	.	.	.	.	.	.	.	.	.	.	.	.	.	.	.	OXA-48-like	.	.	.	.	.	.	.	.	.	.	.	.	.	.	.	.	.	.	.	.	.	.	IncL/M(pOXA-48)/89.56/100/661	.	.	.	.
OW968082.1	-11.1563	-18.5274	1	10	n/a	152	.	.	.	.	.	.	.	.	.	.	.	.	.	.	.	OXA-48-like	.	.	.	.	.	.	.	.	.	.	.	.	.	.	.	.	.	.	.	.	.	.	IncL/M(pOXA-48)/89.56/100/661	.	.	.	.
OW968066.1	-11.1563	-18.5273	1	10	n/a	1401	.	.	.	.	.	.	.	.	.	.	.	.	.	.	.	OXA-48-like	.	.	.	.	.	.	.	.	.	.	.	.	.	.	.	.	.	.	.	.	.	.	IncL/M(pOXA-48)/89.56/100/661	.	.	.	.
OW968043.1	-10.3513	-19.4642	0.540906	10	n/a	39	.	.	.	.	.	.	.	.	.	.	.	.	.	.	.	.	.	.	.	.	.	.	.	.	.	.	.	.	.	.	.	.	.	.	.	.	.	.	IncL/M(pOXA-48)/89.56/100/661	.	.	.	.
OW968039.1	-11.5698	-17.6536	1	10	n/a	11	.	.	.	.	.	.	.	.	.	.	.	.	.	.	.	OXA-48-like	.	.	.	.	.	.	.	.	.	.	.	.	.	.	.	.	.	.	.	.	.	.	IncL/M(pOXA-48)/89.56/100/661	.	.	.	.
OW968036.1	-11.5698	-17.6536	1	10	n/a	307	.	.	.	.	.	.	.	.	.	.	.	.	.	.	.	OXA-48-like	.	.	.	.	.	.	.	.	.	.	.	.	.	.	.	.	.	.	.	.	.	.	IncL/M(pOXA-48)/89.56/100/661	.	.	.	.
OW968025.1	-11.5698	-17.6536	1	10	n/a	11	.	.	.	.	.	.	.	.	.	.	.	.	.	.	.	OXA-48-like	.	.	.	.	.	.	.	.	.	.	.	.	.	.	.	.	.	.	.	.	.	.	IncL/M(pOXA-48)/89.56/100/661	.	.	.	.
OW968009.1	-11.8735	-17.3236	0.970639	10	n/a	11	.	.	.	.	.	.	.	.	.	.	.	.	.	.	.	OXA-48-like	.	.	.	.	.	.	.	.	.	.	.	.	.	.	.	.	.	.	.	.	.	.	IncL/M(pOXA-48)/89.56/100/661	.	.	.	.
OW967998.1	-11.1743	-18.5136	1	10	n/a	392	.	.	.	.	.	.	.	.	.	.	.	.	.	.	.	OXA-48-like	.	.	.	.	.	.	.	.	.	.	.	.	.	.	.	.	.	.	.	.	.	.	IncL/M(pOXA-48)/89.56/100/661	.	.	.	.
OW967993.1	-11.5698	-17.6536	1	10	n/a	11	.	.	.	.	.	.	.	.	.	.	.	.	.	.	.	OXA-48-like	.	.	.	.	.	.	.	.	.	.	.	.	.	.	.	.	.	.	.	.	.	.	IncL/M(pOXA-48)/89.56/100/661	.	.	.	.
OW967986.1	-11.1563	-18.5272	1	10	n/a	15	.	.	.	.	.	.	.	.	.	.	.	.	.	.	.	OXA-48-like	.	.	.	.	.	.	.	.	.	.	.	.	.	.	.	.	.	.	.	.	.	.	IncL/M(pOXA-48)/89.56/100/661	.	.	.	.
OW967962.1	-11.1563	-18.5272	1	10	n/a	15	.	.	.	.	.	.	.	.	.	.	.	.	.	.	.	OXA-48-like	.	.	.	.	.	.	.	.	.	.	.	.	.	.	.	.	.	.	.	.	.	.	IncL/M(pOXA-48)/89.56/100/661	.	.	.	.
OW967951.1	-10.3641	-19.3509	0.580116	10	n/a	307	.	.	.	.	.	.	.	.	.	.	.	.	.	.	.	.	.	.	.	.	.	.	.	.	.	.	.	.	.	.	.	.	.	.	.	.	.	.	IncL/M(pOXA-48)/89.56/100/661	.	.	.	.
OW967902.1	-11.1563	-18.5274	1	10	n/a	152	.	.	.	.	.	.	.	.	.	.	.	.	.	.	.	OXA-48-like	.	.	.	.	.	.	.	.	.	.	.	.	.	.	.	.	.	.	.	.	.	.	IncL/M(pOXA-48)/89.56/100/661	.	.	.	.
OW967870.1	-11.1564	-18.5271	1	10	n/a	307	.	.	.	.	.	.	.	.	.	.	.	.	.	.	.	OXA-48-like	.	.	.	.	.	.	.	.	.	.	.	.	.	.	.	.	.	.	.	.	.	.	IncL/M(pOXA-48)/89.56/100/661	.	.	.	.
OW967863.1	-11.5698	-17.6536	1	10	n/a	11	.	.	.	.	.	.	.	.	.	.	.	.	.	.	.	OXA-48-like	.	.	.	.	.	.	.	.	.	.	.	.	.	.	.	.	.	.	.	.	.	.	IncL/M(pOXA-48)/89.56/100/661	.	.	.	.
OW967859.1	-11.1837	-17.5409	0.793017	10	n/a	11	.	.	.	.	.	.	.	.	.	.	.	.	.	.	.	OXA-48-like	.	.	.	.	.	.	.	.	.	.	.	.	.	.	.	.	.	.	.	.	.	.	IncL/M(pOXA-48)/89.56/100/661	.	.	.	.
OW967839.1	-11.5344	-17.7589	0.978843	10	n/a	11	.	.	.	.	.	.	.	.	.	.	.	.	.	.	.	OXA-48-like	.	.	.	.	.	.	.	.	.	.	.	.	.	.	.	.	.	.	.	.	.	.	IncL/M(pOXA-48)/89.56/100/661	.	.	.	.
OW967817.1	-11.1563	-18.5274	1	10	n/a	147	.	.	.	.	.	.	.	.	.	.	.	.	.	.	.	OXA-48-like	.	.	.	.	.	.	.	.	.	.	.	.	.	.	.	.	.	.	.	.	.	.	IncL/M(pOXA-48)/89.56/100/661	.	.	.	.
OW967792.1	-11.5698	-17.6536	1	10	n/a	340	.	.	.	.	.	.	.	.	.	.	.	.	.	.	.	OXA-48-like	.	.	.	.	.	.	.	.	.	.	.	.	.	.	.	.	.	.	.	.	.	.	IncL/M(pOXA-48)/89.56/100/661	.	.	.	.
OW967785.1	-12.3216	-18.7017	1	10	n/a	151	.	.	.	.	.	.	.	.	.	.	.	.	.	.	.	OXA-48-like	.	.	.	.	.	.	.	.	.	.	.	.	.	.	.	.	.	.	.	.	.	.	IncL/M(pOXA-48)/89.56/100/661	.	.	.	.
OW967779.1	-11.2256	-18.482	0.999455	10	n/a	392	.	.	.	.	.	.	.	.	.	.	.	.	.	.	.	OXA-48-like	.	.	.	.	.	.	.	.	.	.	.	.	.	.	.	.	.	.	.	.	.	.	IncL/M(pOXA-48)/89.56/100/661	.	.	.	.
OW967771.1	-11.9207	-17.5524	0.986391	10	n/a	307	.	.	.	.	.	.	.	.	.	.	.	.	.	.	.	OXA-48-like	.	.	.	.	.	.	.	.	.	.	.	.	.	.	.	.	.	.	.	.	.	.	IncL/M(pOXA-48)/89.56/100/661	.	.	.	.
OW967762.1	-11.1564	-18.5271	1	10	n/a	198	.	.	.	.	.	.	.	.	.	.	.	.	.	.	.	OXA-48-like	.	.	.	.	.	.	.	.	.	.	.	.	.	.	.	.	.	.	.	.	.	.	IncL/M(pOXA-48)/89.56/100/661	.	.	.	.
OW967617.1	-11.5802	-17.6547	1	10	n/a	392	.	.	.	.	.	.	.	.	.	.	.	.	.	.	.	OXA-48-like	.	.	.	.	.	.	.	.	.	.	.	.	.	.	.	.	.	.	.	.	.	.	IncL/M(pOXA-48)/89.56/100/661	.	.	.	.
OW967598.1	-12.0884	-17.2535	0.816465	10	n/a	11	.	.	.	.	.	.	.	.	.	.	.	.	.	.	.	OXA-48-like	.	.	.	.	.	.	.	.	.	.	.	.	.	.	.	.	.	.	.	.	.	.	IncL/M(pOXA-48)/89.56/100/661	.	.	.	.
OW967542.1	-11.6881	-17.662	1	10	n/a	11	.	.	.	.	.	.	.	.	.	.	.	.	.	.	.	OXA-48-like	.	.	.	.	.	.	.	.	.	.	.	.	.	.	.	.	.	.	.	.	.	.	IncL/M(pOXA-48)/89.56/100/661	.	.	.	.
OW967458.1	-11.2394	-18.4444	1	10	n/a	15	.	.	.	.	.	.	.	.	.	.	.	.	.	.	.	OXA-48-like	.	.	.	.	.	.	.	.	.	.	.	.	.	.	.	.	.	.	.	.	.	.	IncL/M(pOXA-48)/89.56/100/661	.	.	.	.
OW967402.1	-11.6881	-17.662	1	10	n/a	5000	.	.	.	.	.	.	.	.	.	.	.	.	.	.	.	OXA-48-like	.	.	.	.	.	.	.	.	.	.	.	.	.	.	.	.	.	.	.	.	.	.	IncL/M(pOXA-48)/89.56/100/661	.	.	.	.
OW967398.1	-11.6881	-17.662	1	10	n/a	11	.	.	.	.	.	.	.	.	.	.	.	.	.	.	.	OXA-48-like	.	.	.	.	.	.	.	.	.	.	.	.	.	.	.	.	.	.	.	.	.	.	IncL/M(pOXA-48)/89.56/100/661	.	.	.	.
OW967384.1	-11.5237	-17.6098	0.835272	10	n/a	405	.	.	.	.	.	.	.	.	.	.	.	.	.	.	.	OXA-48-like	.	.	.	.	.	.	.	.	.	.	.	.	.	.	.	.	.	.	.	.	.	.	IncL/M(pOXA-48)/89.56/100/661	.	.	.	.
OW967362.1	-11.6881	-17.662	1	10	n/a	11	.	.	.	.	.	.	.	.	.	.	.	.	.	.	.	OXA-48-like	.	.	.	.	.	.	.	.	.	.	.	.	.	.	.	.	.	.	.	.	.	.	IncL/M(pOXA-48)/89.56/100/661	.	.	.	.
OW967358.1	-11.6881	-17.662	1	10	n/a	5000	.	.	.	.	.	.	.	.	.	.	.	.	.	.	.	OXA-48-like	.	.	.	.	.	.	.	.	.	.	.	.	.	.	.	.	.	.	.	.	.	.	IncL/M(pOXA-48)/89.56/100/661	.	.	.	.
OW967302.1	-11.6881	-17.662	1	10	n/a	5000	.	.	.	.	.	.	.	.	.	.	.	.	.	.	.	OXA-48-like	.	.	.	.	.	.	.	.	.	.	.	.	.	.	.	.	.	.	.	.	.	.	IncL/M(pOXA-48)/89.56/100/661	.	.	.	.
OW967272.1	-11.5829	-17.4852	1	10	n/a	15	.	.	.	.	.	.	.	.	.	.	.	.	.	.	.	OXA-48-like	.	.	.	.	.	.	.	.	.	.	.	.	.	.	.	.	.	.	.	.	.	.	IncL/M(pOXA-48)/89.56/100/661	.	.	.	.
OW967221.1	-11.2096	-18.432	0.991122	10	n/a	628	.	.	.	.	.	.	.	.	.	.	.	.	.	.	.	OXA-48-like	.	.	.	.	.	.	.	.	.	.	.	.	.	.	.	.	.	.	.	.	.	.	IncL/M(pOXA-48)/89.56/100/661	.	.	.	.
OW967201.1	-12.5868	-17.5525	0.660778	10	n/a	11	.	.	.	.	.	.	.	.	.	.	.	.	.	.	.	OXA-48-like	.	.	.	.	.	.	.	.	.	.	.	.	.	.	.	.	.	.	.	.	.	.	IncL/M(pOXA-48)/89.56/100/661	.	.	.	.
OW967032.1	-12.1935	-18.6561	0.922083	10	n/a	405	.	.	.	.	.	.	.	.	.	.	.	.	.	.	.	OXA-48-like	.	.	.	.	.	.	.	.	.	.	.	.	.	.	.	.	.	.	.	.	.	.	IncL/M(pOXA-48)/89.56/100/661	.	.	.	.
OW966974.1	-12.0877	-17.2601	0.818205	10	n/a	11	.	.	.	.	.	.	.	.	.	.	.	.	.	.	.	OXA-48-like	.	.	.	.	.	.	.	.	.	.	.	.	.	.	.	.	.	.	.	.	.	.	IncL/M(pOXA-48)/89.56/100/661	.	.	.	.
OW966966.1	-11.6881	-17.662	1	10	n/a	11	.	.	.	.	.	.	.	.	.	.	.	.	.	.	.	OXA-48-like	.	.	.	.	.	.	.	.	.	.	.	.	.	.	.	.	.	.	.	.	.	.	IncL/M(pOXA-48)/89.56/100/661	.	.	.	.
OW966941.1	-11.1508	-18.449	1	10	n/a	15	.	.	.	.	.	.	.	.	.	.	.	.	.	.	.	OXA-48-like	.	.	.	.	.	.	.	.	.	.	.	.	.	.	.	.	.	.	.	.	.	.	IncL/M(pOXA-48)/89.56/100/661	.	.	.	.
OW959933.1	-11.2204	-17.4102	0.713378	10	n/a	5000	.	.	.	.	.	CTX-M-1-like	.	.	.	.	.	.	.	.	.	OXA-48-like	.	.	blaCTX-M-15	.	.	.	.	.	.	.	.	.	.	.	.	.	.	.	.	.	.	.	IncL/M(pOXA-48)/89.56/100/661	.	.	.	.
OW959927.1	-11.1564	-18.5271	1	10	n/a	11	.	.	.	.	.	.	.	.	.	.	.	.	.	.	.	OXA-48-like	.	.	.	.	.	.	.	.	.	.	.	.	.	.	.	.	.	.	.	.	.	.	IncL/M(pOXA-48)/89.56/100/661	.	.	.	.
OW959921.1	-10.1993	-16.7931	0.415132	10	n/a	101	.	.	.	.	.	.	.	.	.	.	.	.	.	.	.	OXA-48-like	.	.	.	.	.	.	.	.	.	.	.	.	.	.	.	.	.	.	.	.	.	.	IncL/M/89.16/96.15/664	IncN/100/99.22/514	.	.	.
OW959910.1	-11.1564	-18.5271	1	10	n/a	11	.	.	.	.	.	.	.	.	.	.	.	.	.	.	.	OXA-48-like	.	.	.	.	.	.	.	.	.	.	.	.	.	.	.	.	.	.	.	.	.	.	IncL/M(pOXA-48)/89.56/100/661	.	.	.	.
OW959906.1	-12.0269	-17.8256	0.966131	10	n/a	11	.	.	.	.	.	.	.	.	.	.	.	.	.	.	.	OXA-48-like	.	.	.	.	.	.	.	.	.	.	.	.	.	.	.	.	.	.	.	.	.	.	IncL/M(pOXA-48)/89.56/100/661	.	.	.	.
OW959901.1	-8.95718	-19.4716	0.514922	10	n/a	307	.	.	.	.	.	CTX-M-1-like	.	.	.	.	.	.	.	.	.	OXA-48-like	.	.	blaCTX-M-15	.	.	.	.	.	.	.	.	.	.	.	.	.	.	.	.	.	.	.	IncL/M/89.16/96.15/664	.	.	.	.
OW849513.1	-11.2984	-18.9891	1	10	n/a	15	.	.	.	.	.	.	.	.	.	.	.	.	.	.	.	OXA-48-like	.	.	.	.	.	.	.	.	.	.	.	.	.	.	.	.	.	.	.	.	.	.	IncL/M(pOXA-48)/89.56/99.83/661	.	.	.	.
OW849490.1	-11.6622	-17.6592	1	10	n/a	11	.	.	.	.	.	.	.	.	.	.	.	.	.	.	.	OXA-48-like	.	.	.	.	.	.	.	.	.	.	.	.	.	.	.	.	.	.	.	.	.	.	IncL/M(pOXA-48)/89.56/100/661	.	.	.	.
OW849482.1	-11.6881	-17.662	1	10	n/a	5000	.	.	.	.	.	.	.	.	.	.	.	.	.	.	.	OXA-48-like	.	.	.	.	.	.	.	.	.	.	.	.	.	.	.	.	.	.	.	.	.	.	IncL/M(pOXA-48)/89.56/100/661	.	.	.	.
OW849453.1	-11.2968	-18.9879	1	10	n/a	326	.	.	.	.	.	.	.	.	.	.	.	.	.	.	.	OXA-48-like	.	.	.	.	.	.	.	.	.	.	.	.	.	.	.	.	.	.	.	.	.	.	IncL/M(pOXA-48)/89.56/99.83/661	.	.	.	.
OW849442.1	-11.2991	-18.9895	1	10	n/a	147	.	.	.	.	.	.	.	.	.	.	.	.	.	.	.	OXA-48-like	.	.	.	.	.	.	.	.	.	.	.	.	.	.	.	.	.	.	.	.	.	.	IncL/M(pOXA-48)/89.56/99.83/661	.	.	.	.
OW849436.1	-11.2991	-18.9895	1	10	n/a	485	.	.	.	.	.	.	.	.	.	.	.	.	.	.	.	OXA-48-like	.	.	.	.	.	.	.	.	.	.	.	.	.	.	.	.	.	.	.	.	.	.	IncL/M(pOXA-48)/89.56/99.83/661	.	.	.	.
OW849431.1	-12.65	-18.6628	1	10	n/a	437	.	.	.	.	.	.	.	.	.	.	.	.	.	.	.	OXA-48-like	.	.	.	.	.	.	.	.	.	.	.	.	.	.	.	.	.	.	.	.	.	.	IncL/M(pOXA-48)/89.56/100/661	.	.	.	.
OW849423.1	-11.4605	-18.8425	1	10	n/a	307	.	.	.	.	.	.	.	.	.	.	.	.	.	.	.	OXA-48-like	.	.	.	.	.	.	.	.	.	.	.	.	.	.	.	.	.	.	.	.	.	.	IncL/M(pOXA-48)/89.56/100/661	.	.	.	.
OW849407.1	-11.2968	-18.9879	1	10	n/a	405	.	.	.	.	.	.	.	.	.	.	.	.	.	.	.	OXA-48-like	.	.	.	.	.	.	.	.	.	.	.	.	.	.	.	.	.	.	.	.	.	.	IncL/M(pOXA-48)/89.56/99.83/661	.	.	.	.
OW849397.1	-11.1564	-18.5271	1	10	n/a	307	.	.	.	.	.	.	.	.	.	.	.	.	.	.	.	OXA-48-like	.	.	.	.	.	.	.	.	.	.	.	.	.	.	.	.	.	.	.	.	.	.	IncL/M(pOXA-48)/89.56/100/661	.	.	.	.
OW849390.1	-12.65	-18.6628	1	10	n/a	11	.	.	.	.	.	.	.	.	.	.	.	.	.	.	.	OXA-48-like	.	.	.	.	.	.	.	.	.	.	.	.	.	.	.	.	.	.	.	.	.	.	IncL/M(pOXA-48)/89.56/100/661	.	.	.	.
OW849376.1	-12.1295	-19.0733	1	10	n/a	567	.	.	.	.	.	.	.	.	.	.	.	.	.	.	.	OXA-48-like	.	.	.	.	.	.	.	.	.	.	.	.	.	.	.	.	.	.	.	.	.	.	IncL/M(pOXA-48)/89.56/99.83/661	.	.	.	.
OW849368.1	-11.6881	-17.662	1	10	n/a	5000	.	.	.	.	.	.	.	.	.	.	.	.	.	.	.	OXA-48-like	.	.	.	.	.	.	.	.	.	.	.	.	.	.	.	.	.	.	.	.	.	.	IncL/M(pOXA-48)/89.56/100/661	.	.	.	.
OW849353.1	-11.2968	-18.9879	1	10	n/a	326	.	.	.	.	.	.	.	.	.	.	.	.	.	.	.	OXA-48-like	.	.	.	.	.	.	.	.	.	.	.	.	.	.	.	.	.	.	.	.	.	.	IncL/M(pOXA-48)/89.56/99.83/661	.	.	.	.
OW849347.1	-11.3582	-18.9502	1	10	n/a	147	.	.	.	.	.	.	.	.	.	.	.	.	.	.	.	OXA-48-like	.	.	.	.	.	.	.	.	.	.	.	.	.	.	.	.	.	.	.	.	.	.	IncL/M(pOXA-48)/89.56/99.83/661	.	.	.	.
OW849337.1	-11.1564	-18.5271	1	10	n/a	307	.	.	.	.	.	.	.	.	.	.	.	.	.	.	.	OXA-48-like	.	.	.	.	.	.	.	.	.	.	.	.	.	.	.	.	.	.	.	.	.	.	IncL/M(pOXA-48)/89.56/100/661	.	.	.	.
OW849328.1	-11.1563	-18.5274	1	10	n/a	405	.	.	.	.	.	.	.	.	.	.	.	.	.	.	.	OXA-48-like	.	.	.	.	.	.	.	.	.	.	.	.	.	.	.	.	.	.	.	.	.	.	IncL/M(pOXA-48)/89.56/100/661	.	.	.	.
OW849299.1	-11.2975	-18.9887	1	10	n/a	15	.	.	.	.	.	.	.	.	.	.	.	.	.	.	.	OXA-48-like	.	.	.	.	.	.	.	.	.	.	.	.	.	.	.	.	.	.	.	.	.	.	IncL/M(pOXA-48)/88.5/99.83/661	.	.	.	.
OW849291.1	-11.36	-18.9547	1	10	n/a	326	.	.	.	.	.	.	.	.	.	.	.	.	.	.	.	OXA-48-like	.	.	.	.	.	.	.	.	.	.	.	.	.	.	.	.	.	.	.	.	.	.	IncL/M(pOXA-48)/89.56/99.83/661	.	.	.	.
OW849285.1	-12.65	-18.6628	1	10	n/a	11	.	.	.	.	.	.	.	.	.	.	.	.	.	.	.	OXA-48-like	.	.	.	.	.	.	.	.	.	.	.	.	.	.	.	.	.	.	.	.	.	.	IncL/M(pOXA-48)/89.56/100/661	.	.	.	.
OW849279.1	-12.65	-18.6628	1	10	n/a	11	.	.	.	.	.	.	.	.	.	.	.	.	.	.	.	OXA-48-like	.	.	.	.	.	.	.	.	.	.	.	.	.	.	.	.	.	.	.	.	.	.	IncL/M(pOXA-48)/89.56/100/661	.	.	.	.
OW849274.1	-11.298	-18.9892	1	10	n/a	15	.	.	.	.	.	.	.	.	.	.	.	.	.	.	.	OXA-48-like	.	.	.	.	.	.	.	.	.	.	.	.	.	.	.	.	.	.	.	.	.	.	IncL/M(pOXA-48)/88.5/99.83/661	.	.	.	.
OW849267.1	-11.1564	-18.5271	1	10	n/a	11	.	.	.	.	.	.	.	.	.	.	.	.	.	.	.	OXA-48-like	.	.	.	.	.	.	.	.	.	.	.	.	.	.	.	.	.	.	.	.	.	.	IncL/M(pOXA-48)/89.56/100/661	.	.	.	.
OW849264.1	-10.4001	-19.3217	0.601364	10	n/a	14	.	.	.	.	.	.	.	.	.	.	.	.	.	.	.	.	.	.	.	.	.	.	.	.	.	.	.	.	.	.	.	.	.	.	.	.	.	.	IncL/M(pOXA-48)/89.56/100/661	.	.	.	.
OW849252.1	-12.6809	-18.6108	0.780483	10	n/a	11	.	.	.	.	.	.	.	.	.	.	.	.	.	.	.	OXA-48-like	.	.	.	.	.	.	.	.	.	.	.	.	.	.	.	.	.	.	.	.	.	.	IncL/M(pOXA-48)/89.56/100/661	.	.	.	.
OW849246.1	-11.2991	-18.9895	1	10	n/a	147	.	.	.	.	.	.	.	.	.	.	.	.	.	.	.	OXA-48-like	.	.	.	.	.	.	.	.	.	.	.	.	.	.	.	.	.	.	.	.	.	.	IncL/M(pOXA-48)/89.56/99.83/661	.	.	.	.
OW849241.1	-11.517	-17.7527	0.98109	10	n/a	5000	.	.	.	.	.	.	.	.	.	.	.	.	.	.	.	OXA-48-like	.	.	.	.	.	.	.	.	.	.	.	.	.	blaOXA-48	.	.	.	.	.	.	.	.	IncL/M(pOXA-48)/89.56/100/661	.	.	.	.
OW849228.1	-11.2968	-18.9879	1	10	n/a	405	.	.	.	.	.	.	.	.	.	.	.	.	.	.	.	OXA-48-like	.	.	.	.	.	.	.	.	.	.	.	.	.	.	.	.	.	.	.	.	.	.	IncL/M(pOXA-48)/89.56/99.83/661	.	.	.	.
OW849223.1	-11.1564	-18.5271	1	10	n/a	307	.	.	.	.	.	.	.	.	.	.	.	.	.	.	.	OXA-48-like	.	.	.	.	.	.	.	.	.	.	.	.	.	.	.	.	.	.	.	.	.	.	IncL/M(pOXA-48)/89.56/100/661	.	.	.	.
OW849186.1	-11.1564	-18.5271	1	10	n/a	307	.	.	.	.	.	.	.	.	.	.	.	.	.	.	.	OXA-48-like	.	.	.	.	.	.	.	.	.	.	.	.	.	.	.	.	.	.	.	.	.	.	IncL/M(pOXA-48)/89.56/100/661	.	.	.	.
OW849120.1	-11.5802	-17.6547	1	10	n/a	392	.	.	.	.	.	.	.	.	.	.	.	.	.	.	.	OXA-48-like	.	.	.	.	.	.	.	.	.	.	.	.	.	.	.	.	.	.	.	.	.	.	IncL/M(pOXA-48)/89.56/100/661	.	.	.	.
OW849088.1	-11.1563	-18.5273	1	10	n/a	392	.	.	.	.	.	.	.	.	.	.	.	.	.	.	.	OXA-48-like	.	.	.	.	.	.	.	.	.	.	.	.	.	.	.	.	.	.	.	.	.	.	IncL/M(pOXA-48)/89.56/100/661	.	.	.	.
OW849054.1	-11.1563	-18.5273	1	10	n/a	392	.	.	.	.	.	.	.	.	.	.	.	.	.	.	.	OXA-48-like	.	.	.	.	.	.	.	.	.	.	.	.	.	.	.	.	.	.	.	.	.	.	IncL/M(pOXA-48)/89.56/100/661	.	.	.	.
OW849014.1	-11.5862	-17.4854	1	10	n/a	392	.	.	.	.	.	.	.	.	.	.	.	.	.	.	.	OXA-48-like	.	.	.	.	.	.	.	.	.	.	.	.	.	.	.	.	.	.	.	.	.	.	IncL/M(pOXA-48)/89.56/100/661	.	.	.	.
OW848967.1	-11.5862	-17.4854	1	10	n/a	392	.	.	.	.	.	.	.	.	.	.	.	.	.	.	.	OXA-48-like	.	.	.	.	.	.	.	.	.	.	.	.	.	.	.	.	.	.	.	.	.	.	IncL/M(pOXA-48)/89.56/100/661	.	.	.	.
OW848903.1	-11.1563	-18.5272	1	10	n/a	11	.	.	.	.	.	.	.	.	.	.	.	.	.	.	.	OXA-48-like	.	.	.	.	.	.	.	.	.	.	.	.	.	.	.	.	.	.	.	.	.	.	IncL/M(pOXA-48)/89.56/100/661	.	.	.	.
OW848895.1	-11.1563	-18.5272	1	10	n/a	219	.	.	.	.	.	.	.	.	.	.	.	.	.	.	.	OXA-48-like	.	.	.	.	.	.	.	.	.	.	.	.	.	.	.	.	.	.	.	.	.	.	IncL/M(pOXA-48)/89.56/100/661	.	.	.	.
OW848889.1	-11.1563	-18.5273	1	10	n/a	392	.	.	.	.	.	.	.	.	.	.	.	.	.	.	.	OXA-48-like	.	.	.	.	.	.	.	.	.	.	.	.	.	.	.	.	.	.	.	.	.	.	IncL/M(pOXA-48)/89.56/100/661	.	.	.	.
OW848882.1	-11.1563	-18.5273	1	10	n/a	392	.	.	.	.	.	.	.	.	.	.	.	.	.	.	.	OXA-48-like	.	.	.	.	.	.	.	.	.	.	.	.	.	.	.	.	.	.	.	.	.	.	IncL/M(pOXA-48)/89.56/100/661	.	.	.	.
OW848871.1	-11.15	-18.4485	1	10	n/a	405	.	.	.	.	.	.	.	.	.	.	.	.	.	.	.	OXA-48-like	.	.	.	.	.	.	.	.	.	.	.	.	.	.	.	.	.	.	.	.	.	.	IncL/M(pOXA-48)/89.56/100/661	.	.	.	.
OW848864.1	-11.1531	-18.4501	1	10	n/a	405	.	.	.	.	.	.	.	.	.	.	.	.	.	.	.	OXA-48-like	.	.	.	.	.	.	.	.	.	.	.	.	.	.	.	.	.	.	.	.	.	.	IncL/M(pOXA-48)/89.56/100/661	.	.	.	.
OW848852.1	-11.2129	-18.4294	0.996219	10	n/a	11	.	.	.	.	.	.	.	.	.	.	.	.	.	.	.	OXA-48-like	.	.	.	.	.	.	.	.	.	.	.	.	.	.	.	.	.	.	.	.	.	.	IncL/M(pOXA-48)/89.56/100/661	.	.	.	.
OW848847.1	-12.8726	-18.9634	0.637589	10	n/a	405	.	.	.	.	.	.	.	.	.	.	.	.	.	.	.	OXA-48-like	.	.	.	.	.	.	.	.	.	.	.	.	.	.	.	.	.	.	.	.	.	.	IncL/M(pOXA-48)/89.56/100/661	.	.	.	.
OW848836.1	-11.1564	-18.5271	1	10	n/a	15	.	.	.	.	.	.	.	.	.	.	.	.	.	.	.	OXA-48-like	.	.	.	.	.	.	.	.	.	.	.	.	.	.	.	.	.	.	.	.	.	.	IncL/M(pOXA-48)/89.56/100/661	.	.	.	.
OW848819.1	-11.2125	-18.4284	0.997304	10	n/a	405	.	.	.	.	.	.	.	.	.	.	.	.	.	.	.	OXA-48-like	.	.	.	.	.	.	.	.	.	.	.	.	.	.	.	.	.	.	.	.	.	.	IncL/M(pOXA-48)/89.56/100/661	.	.	.	.
OW848809.1	-11.2139	-17.4215	0.719825	10	n/a	11	.	.	.	.	.	CTX-M-1-like	.	.	.	.	.	.	.	.	.	OXA-48-like	.	.	blaCTX-M-15	.	.	.	.	.	.	.	.	.	.	.	.	.	.	.	.	.	.	.	IncL/M(pOXA-48)/89.56/100/661	.	.	.	.
OW848800.1	-11.3577	-18.9693	1	10	n/a	15	.	.	.	.	.	.	.	.	.	.	.	.	.	.	.	OXA-48-like	.	.	.	.	.	.	.	.	.	.	.	.	.	.	.	.	.	.	.	.	.	.	IncL/M(pOXA-48)/88.5/99.83/661	.	.	.	.
OW635552.1	-11.1563	-18.5273	1	10	n/a	392	.	.	.	.	.	.	.	.	.	.	.	.	.	.	.	OXA-48-like	.	.	.	.	.	.	.	.	.	.	.	.	.	.	.	.	.	.	.	.	.	.	IncL/M(pOXA-48)/89.56/100/661	.	.	.	.
OV754012.1	-8.5749	-21.0815	0.445447	10	n/a	39	.	.	.	.	.	.	.	.	.	.	.	.	.	.	.	.	.	SHV-like	.	.	.	.	.	.	.	.	.	.	.	.	.	.	.	.	.	.	.	.	IncL/M(pOXA-48)/89.41/96.64/661	.	.	.	.
OV753989.1	-8.55341	-21.0725	0.440401	10	n/a	39	.	.	.	.	.	.	.	.	.	.	.	.	.	.	.	.	.	SHV-like	.	.	.	.	.	.	.	.	.	.	.	.	.	.	.	.	.	.	.	.	IncL/M(pOXA-48)/89.41/96.64/661	.	.	.	.
OU342709.1	-10.3969	-19.3016	0.604964	10	n/a	39	.	.	.	.	.	.	.	.	.	.	.	.	.	.	.	.	.	.	.	.	.	.	.	.	.	.	.	.	.	.	.	.	.	.	.	.	.	.	IncL/M(pOXA-48)/89.56/100/661	.	.	.	.
LR890707.1	-12.1267	-17.7387	1	10	n/a	231	.	.	.	.	.	.	.	.	.	.	.	.	.	.	.	OXA-48-like	.	.	.	.	.	.	.	.	.	.	.	.	.	.	.	.	.	.	.	.	.	.	IncL/M(pOXA-48)/89.56/100/661	.	.	.	.
LR890637.1	-12.1267	-17.7387	1	10	n/a	231	.	.	.	.	.	.	.	.	.	.	.	.	.	.	.	OXA-48-like	.	.	.	.	.	.	.	.	.	.	.	.	.	.	.	.	.	.	.	.	.	.	IncL/M(pOXA-48)/89.56/100/661	.	.	.	.
LR890520.1	-12.1267	-17.7387	1	10	n/a	231	.	.	.	.	.	.	.	.	.	.	.	.	.	.	.	OXA-48-like	.	.	.	.	.	.	.	.	.	.	.	.	.	.	.	.	.	.	.	.	.	.	IncL/M(pOXA-48)/89.56/100/661	.	.	.	.
LR890505.1	-12.1267	-17.7387	1	10	n/a	231	.	.	.	.	.	.	.	.	.	.	.	.	.	.	.	OXA-48-like	.	.	.	.	.	.	.	.	.	.	.	.	.	.	.	.	.	.	.	.	.	.	IncL/M(pOXA-48)/89.56/100/661	.	.	.	.
LR890436.1	-12.3229	-20.5893	0.420587	10	n/a	17	.	.	.	.	.	.	.	.	.	.	.	.	.	.	.	.	.	.	.	.	.	.	.	.	.	.	.	.	.	.	.	.	.	.	.	.	.	.	IncL/M/89.16/96.15/664	.	.	.	.
LR890431.1	-12.1267	-17.7387	1	10	n/a	231	.	.	.	.	.	.	.	.	.	.	.	.	.	.	.	OXA-48-like	.	.	.	.	.	.	.	.	.	.	.	.	.	.	.	.	.	.	.	.	.	.	IncL/M(pOXA-48)/89.56/100/661	.	.	.	.
LR890259.1	-12.0763	-17.838	0.961038	10	n/a	231	.	.	.	.	.	.	.	.	.	.	.	.	.	.	.	OXA-48-like	.	.	.	.	.	.	.	.	.	.	.	.	.	.	.	.	.	.	.	.	.	.	IncL/M(pOXA-48)/89.56/100/661	.	.	.	.
LR745044.1	-12.2871	-18.8609	0.899398	10	n/a	86	.	.	.	.	.	.	.	.	.	.	.	.	.	.	.	OXA-48-like	.	.	.	.	.	.	.	.	.	.	.	.	.	.	.	.	.	.	.	.	.	.	IncL/M(pOXA-48)/100/100/661	.	.	.	.
LR025100.1	-11.1563	-18.5274	1	10	n/a	3385	.	.	.	.	.	.	.	.	.	.	.	.	.	.	.	OXA-48-like	.	.	.	.	.	.	.	.	.	.	.	.	.	.	.	.	.	.	.	.	.	.	IncL/M(pOXA-48)/89.56/100/661	.	.	.	.
LR025095.1	-11.5986	-19.1284	0.984281	10	n/a	16	.	.	.	.	.	.	.	.	.	.	.	.	.	.	.	OXA-48-like	.	.	.	.	.	.	.	.	.	.	.	.	.	.	.	.	.	.	.	.	.	.	IncL/M(pOXA-48)/89.56/100/661	.	.	.	.
LR025091.1	-11.1563	-18.5274	1	10	n/a	16	.	.	.	.	.	.	.	.	.	.	.	.	.	.	.	OXA-48-like	.	.	.	.	.	.	.	.	.	.	.	.	.	.	.	.	.	.	.	.	.	.	IncL/M(pOXA-48)/89.56/100/661	.	.	.	.
CP118402.1	-14.4066	-19.1436	0.311109	10	n/a	491	.	.	.	.	.	.	.	.	.	.	.	.	.	.	.	.	.	.	.	.	.	.	.	.	.	.	.	.	.	.	.	.	.	.	.	.	.	.	.	.	.	.	.
CP118400.1	-11.9822	-20.2413	0.53218	10	n/a	491	.	.	.	.	.	.	.	.	.	.	.	.	.	.	.	.	.	.	.	.	.	.	.	.	.	.	.	.	.	.	.	.	.	.	.	.	.	.	IncL/M(pOXA-48)/99.7/95.2/661	.	.	.	.
CP114756.1	-12.1091	-19.2499	0.952868	10	n/a	-	.	.	.	.	.	.	.	.	.	.	.	.	.	.	.	OXA-48-like	.	.	.	.	.	.	.	.	.	.	.	.	.	.	.	.	.	.	.	.	.	.	IncL/M(pOXA-48)/89.56/100/661	.	.	.	.
CP107356.1	-10.1249	-20.6962	0.480568	10	n/a	1049	.	.	.	.	.	.	.	.	.	.	KPC-like	NDM-like	.	.	.	.	.	.	.	.	.	blaKPC-2	.	.	.	.	blaNDM-1	.	.	.	.	.	.	.	.	.	.	.	IncL/M(pMU407)/100/99.46/739	.	.	.	.
CP103701.1	-10.1757	-20.7623	0.462204	10	n/a	307	.	.	.	.	.	.	.	.	.	.	.	.	.	.	.	.	.	.	.	.	.	.	.	.	.	.	.	.	.	.	.	.	.	.	.	.	.	.	IncL/M(pMU407)/100/99.46/739	.	.	.	.
CP103502.1	-10.5764	-21.6941	0.351828	10	n/a	45	.	.	.	.	.	.	.	.	.	.	.	.	.	.	.	.	.	SHV-like	.	.	.	.	.	.	.	.	.	.	.	.	.	.	.	.	.	blaSHV-7	.	.	IncL/M(pMU407)/90.66/99.4/739	.	.	.	.
CP097424.1	-12.0267	-17.8285	0.969763	10	n/a	11	.	.	.	.	.	.	.	.	.	.	.	.	.	.	.	OXA-48-like	.	.	.	.	.	.	.	.	.	.	.	.	.	.	.	.	.	.	.	.	.	.	IncL/M(pOXA-48)/100/100/661	.	.	.	.
CP097422.1	-13.0829	-17.6464	0.540377	10	n/a	11	.	.	.	.	.	.	.	.	.	.	.	.	.	.	.	OXA-48-like	.	.	.	.	.	.	.	.	.	.	.	.	.	.	.	.	.	.	.	.	.	.	IncL/M(pOXA-48)/89.56/100/661	.	.	.	.
CP097417.1	-11.5698	-17.6536	1	10	n/a	307	.	.	.	.	.	.	.	.	.	.	.	.	.	.	.	OXA-48-like	.	.	.	.	.	.	.	.	.	.	.	.	.	.	.	.	.	.	.	.	.	.	IncL/M(pOXA-48)/89.56/100/661	.	.	.	.
CP097413.1	-11.5227	-17.7579	0.984351	10	n/a	307	.	.	.	.	.	.	.	.	.	.	.	.	.	.	.	OXA-48-like	.	.	.	.	.	.	.	.	.	.	.	.	.	.	.	.	.	.	.	.	.	.	IncL/M(pOXA-48)/89.56/100/661	.	.	.	.
CP094900.1	-9.91704	-21.2161	0.418943	10	n/a	941	.	.	.	.	.	.	.	.	.	.	KPC-like	.	.	.	.	.	.	.	.	.	.	.	blaKPC-3	.	.	.	.	.	.	.	.	.	.	.	.	.	.	.	IncL/M(pMU407)/90.66/99.55/739	.	.	.	.
CP092591.1	-11.93	-18.5578	1	10	n/a	11	.	.	.	.	.	.	.	.	.	.	.	.	.	.	.	OXA-48-like	.	.	.	.	.	.	.	.	.	.	.	.	.	.	.	.	.	.	.	.	.	.	IncL/M(pOXA-48)/89.56/100/661	.	.	.	.
CP091815.1	-9.76187	-18.2214	0.4962	10	n/a	383	.	.	.	.	.	.	.	.	.	CTX-M-9-like	.	.	.	.	.	OXA-48-like	.	.	.	blaCTX-M-14	.	.	.	.	.	.	.	.	.	.	.	.	.	.	.	.	.	.	IncL/M(pOXA-48)/89.56/100/661	.	.	.	.
CP089887.1	-12.2359	-20.5579	0.423483	10	n/a	405	.	.	.	.	.	.	.	.	.	.	.	.	.	.	.	.	.	.	.	.	.	.	.	.	.	.	.	.	.	.	.	.	.	.	.	.	.	.	IncL/M(pOXA-48)/99.7/95.2/661	.	.	.	.
CP089027.1	-11.4211	-19.0219	1	10	n/a	23	.	.	.	.	.	.	.	.	.	.	.	.	.	.	.	OXA-48-like	.	.	.	.	.	.	.	.	.	.	.	.	.	.	.	.	.	.	.	.	.	.	IncL/M(pOXA-48)/89.56/100/661	.	.	.	.
CP089016.1	-12.1267	-17.7387	1	10	n/a	11	.	.	.	.	.	.	.	.	.	.	.	.	.	.	.	OXA-48-like	.	.	.	.	.	.	.	.	.	.	.	.	.	.	.	.	.	.	.	.	.	.	IncL/M(pOXA-48)/89.56/100/661	.	.	.	.
CP089008.1	-11.1778	-18.6763	1	10	n/a	147	.	.	.	.	.	.	.	.	.	.	.	.	.	.	.	OXA-48-like	.	.	.	.	.	.	.	.	.	.	.	.	.	.	.	.	.	.	.	.	.	.	IncL/M(pOXA-48)/89.56/100/661	.	.	.	.
CP087620.1	-11.0582	-20.1262	0.597989	10	n/a	15	.	.	.	.	.	.	.	.	.	.	KPC-like	.	.	.	.	.	.	.	.	.	.	blaKPC-2	.	.	.	.	.	.	.	.	.	.	.	.	.	.	.	.	IncL/M(pOXA-48)/89.56/100/661	.	.	.	.
CP086451.1	-11.1809	-18.4954	1	10	n/a	101	.	.	.	.	.	.	.	.	.	.	.	.	.	.	.	OXA-48-like	.	.	.	.	.	.	.	.	.	.	.	.	.	.	.	.	.	.	.	.	.	.	IncL/M(pOXA-48)/89.56/100/661	.	.	.	.
CP086443.1	-11.1809	-18.4954	1	10	n/a	101	.	.	.	.	.	.	.	.	.	.	.	.	.	.	.	OXA-48-like	.	.	.	.	.	.	.	.	.	.	.	.	.	.	.	.	.	.	.	.	.	.	IncL/M(pOXA-48)/89.56/100/661	.	.	.	.
CP086435.1	-11.1809	-18.4954	1	10	n/a	101	.	.	.	.	.	.	.	.	.	.	.	.	.	.	.	OXA-48-like	.	.	.	.	.	.	.	.	.	.	.	.	.	.	.	.	.	.	.	.	.	.	IncL/M(pOXA-48)/89.56/100/661	.	.	.	.
CP086427.1	-11.1809	-18.4954	1	10	n/a	101	.	.	.	.	.	.	.	.	.	.	.	.	.	.	.	OXA-48-like	.	.	.	.	.	.	.	.	.	.	.	.	.	.	.	.	.	.	.	.	.	.	IncL/M(pOXA-48)/89.56/100/661	.	.	.	.
CP085868.1	-11.1563	-18.5274	1	10	n/a	219	.	.	.	.	.	.	.	.	.	.	.	.	.	.	.	OXA-48-like	.	.	.	.	.	.	.	.	.	.	.	.	.	.	.	.	.	.	.	.	.	.	IncL/M(pOXA-48)/89.56/100/661	.	.	.	.
CP085864.1	-11.1563	-18.5274	1	10	n/a	5873	.	.	.	.	.	.	.	.	.	.	.	.	.	.	.	OXA-48-like	.	.	.	.	.	.	.	.	.	.	.	.	.	.	.	.	.	.	.	.	.	.	IncL/M(pOXA-48)/89.56/100/661	.	.	.	.
CP085741.1	-11.1072	-20.9219	0.425889	10	n/a	11	.	.	.	.	.	.	.	.	.	.	.	.	.	.	.	.	.	.	.	.	.	.	.	.	.	.	.	.	.	.	.	.	.	.	.	.	.	.	IncL/M(pMU407)/100/99.46/739	.	.	.	.
CP084499.1	-7.76023	-20.0022	0.397215	10	n/a	11	.	.	.	.	.	CTX-M-1-like	.	.	.	.	.	.	.	.	.	.	.	.	blaCTX-M-15	.	.	.	.	.	.	.	.	.	.	.	.	.	.	.	.	.	.	.	IncL/M/89.61/100/664	.	.	.	.
CP083077.1	-9.27441	-18.2805	0.431275	10	n/a	147	.	.	.	.	.	.	.	.	.	CTX-M-9-like	.	.	.	.	.	OXA-48-like	.	.	.	blaCTX-M-14	.	.	.	.	.	.	.	.	.	.	.	.	.	.	.	.	.	.	IncL/M(pMU407)/90.66/99.55/739	.	.	.	.
CP083073.1	-11.1563	-18.5274	1	10	n/a	392	.	.	.	.	.	.	.	.	.	.	.	.	.	.	.	OXA-48-like	.	.	.	.	.	.	.	.	.	.	.	.	.	.	.	.	.	.	.	.	.	.	IncL/M(pOXA-48)/89.56/100/661	.	.	.	.
CP083068.1	-11.1563	-18.5274	1	10	n/a	1213	.	.	.	.	.	.	.	.	.	.	.	.	.	.	.	OXA-48-like	.	.	.	.	.	.	.	.	.	.	.	.	.	.	.	.	.	.	.	.	.	.	IncL/M(pOXA-48)/89.56/100/661	.	.	.	.
CP083064.1	-12.2072	-18.6551	0.922864	10	n/a	2719	.	.	.	.	.	.	.	.	.	.	.	.	.	.	.	OXA-48-like	.	.	.	.	.	.	.	.	.	.	.	.	.	.	.	.	.	.	.	.	.	.	IncL/M(pOXA-48)/89.56/100/661	.	.	.	.
CP083053.1	-12.1981	-18.6527	0.925994	10	n/a	37	.	.	.	.	.	.	.	.	.	.	.	.	.	.	.	OXA-48-like	.	.	.	.	.	.	.	.	.	.	.	.	.	.	.	.	.	.	.	.	.	.	IncL/M(pOXA-48)/89.56/100/661	.	.	.	.
CP083038.1	-11.1563	-18.5274	1	10	n/a	101	.	.	.	.	.	.	.	.	.	.	.	.	.	.	.	OXA-48-like	.	.	.	.	.	.	.	.	.	.	.	.	.	.	.	.	.	.	.	.	.	.	IncL/M(pOXA-48)/89.56/100/661	.	.	.	.
CP083013.1	-8.88746	-17.8873	1	10	n/a	101	.	.	.	.	.	.	.	.	.	CTX-M-9-like	.	.	.	.	.	OXA-48-like	.	.	.	blaCTX-M-14	.	.	.	.	.	.	.	.	.	.	.	.	.	.	.	.	.	.	IncL/M(pMU407)/90.66/99.55/739	.	.	.	.
CP082996.1	-11.9487	-18.5616	1	10	n/a	437	.	.	.	.	.	.	.	.	.	.	.	.	.	.	.	OXA-48-like	.	.	.	.	.	.	.	.	.	.	.	.	.	.	.	.	.	.	.	.	.	.	IncL/M(pOXA-48)/89.56/100/661	.	.	.	.
CP082980.1	-8.96716	-17.9342	0.364545	10	n/a	101	.	.	.	.	.	.	.	.	.	CTX-M-9-like	.	.	.	.	.	OXA-48-like	.	.	.	blaCTX-M-14	.	.	.	.	.	.	.	.	.	.	.	.	.	.	.	.	.	.	IncL/M(pMU407)/90.66/99.55/739	.	.	.	.
CP082969.1	-11.6653	-19.2109	1	10	n/a	101	.	.	.	.	.	.	.	.	.	.	.	.	.	.	.	OXA-48-like	.	.	.	.	.	.	.	.	.	.	.	.	.	.	.	.	.	.	.	.	.	.	IncL/M(pOXA-48)/89.56/100/661	.	.	.	.
CP082157.1	-11.5058	-17.7609	0.996555	10	n/a	11	.	.	.	.	.	.	.	.	.	.	.	.	.	.	.	OXA-48-like	.	.	.	.	.	.	.	.	.	.	.	.	.	.	.	.	.	.	.	.	.	.	IncL/M(pOXA-48)/100/100/661	.	.	.	.
CP080360.1	-11.2289	-18.4315	1	10	n/a	16	.	.	.	.	.	.	.	.	.	.	.	.	.	.	.	OXA-48-like	.	.	.	.	.	.	.	.	.	.	.	.	.	.	.	.	.	.	.	.	.	.	IncL/M(pOXA-48)/100/100/661	.	.	.	.
CP077782.1	-11.1563	-18.5274	1	10	n/a	377	.	.	.	.	.	.	.	.	.	.	.	.	.	.	.	OXA-48-like	.	.	.	.	.	.	.	.	.	.	.	.	.	.	.	.	.	.	.	.	.	.	IncL/M(pOXA-48)/89.56/100/661	.	.	.	.
CP076010.1	-11.1809	-18.4954	1	10	n/a	147	.	.	.	.	.	.	.	.	.	.	.	.	.	.	.	OXA-48-like	.	.	.	.	.	.	.	.	.	.	.	.	.	.	.	.	.	.	.	.	.	.	IncL/M(pOXA-48)/89.56/100/661	.	.	.	.
CP075893.1	-9.46402	-19.9731	0.485226	10	n/a	11	.	.	.	.	.	.	.	.	.	.	.	.	.	OXA-1-like	.	.	.	.	.	.	.	.	.	.	.	.	.	blaOXA-1	.	.	.	.	.	.	.	.	.	.	IncL/M(pMU407)/100/100/739	.	.	.	.
CP074679.1	-11.1565	-18.5272	1	10	n/a	5580	.	.	.	.	.	.	.	.	.	.	.	.	.	.	.	OXA-48-like	.	.	.	.	.	.	.	.	.	.	.	.	.	.	.	.	.	.	.	.	.	.	IncL/M(pOXA-48)/89.56/100/661	.	.	.	.
CP071281.1	-9.31942	-18.3624	0.449623	10	n/a	14	.	.	.	.	.	.	.	.	.	CTX-M-9-like	.	.	.	.	.	OXA-48-like	.	.	.	blaCTX-M-14	.	.	.	.	.	.	.	.	.	.	.	.	.	.	.	.	.	.	IncL/M(pMU407)/90.66/99.55/739	.	.	.	.
CP071262.1	-11.1563	-18.5274	1	10	n/a	484	.	.	.	.	.	.	.	.	.	.	.	.	.	.	.	OXA-48-like	.	.	.	.	.	.	.	.	.	.	.	.	.	.	.	.	.	.	.	.	.	.	IncL/M(pOXA-48)/89.56/100/661	.	.	.	.
CP071255.1	-11.1563	-18.5274	1	10	n/a	3251	.	.	.	.	.	.	.	.	.	.	.	.	.	.	.	OXA-48-like	.	.	.	.	.	.	.	.	.	.	.	.	.	.	.	.	.	.	.	.	.	.	IncL/M(pOXA-48)/89.56/100/661	.	.	.	.
CP070185.1	-7.51334	-19.3209	0.353512	10	n/a	628	.	.	.	.	.	.	.	.	.	.	.	.	.	.	.	.	.	.	.	.	.	.	.	.	.	.	.	.	.	.	.	.	.	.	.	.	.	.	IncL/M/100/100/664	.	.	.	.
CP070110.1	-7.84499	-20.4104	0.418911	10	n/a	252	.	.	.	.	.	CTX-M-1-like	.	.	.	.	.	.	.	.	.	.	.	.	blaCTX-M-15	.	.	.	.	.	.	.	.	.	.	.	.	.	.	.	.	.	.	.	IncL/M(pOXA-48)/99.7/96.39/661	.	.	.	.
CP069833.1	-8.16965	-20.0746	0.455608	10	n/a	895	.	.	.	.	.	.	.	.	.	.	.	.	.	.	.	.	.	.	.	.	.	.	.	.	.	.	.	.	.	.	.	.	.	.	.	.	.	.	IncL/M/100/100/664	.	.	.	.
CP068574.1	-9.75429	-18.2212	0.493664	10	n/a	11	.	.	.	.	.	.	.	.	.	CTX-M-9-like	.	.	.	.	.	OXA-48-like	.	.	.	blaCTX-M-14	.	.	.	.	.	.	.	.	.	.	.	.	.	.	.	.	.	.	IncL/M(pOXA-48)/99.7/99.7/661	.	.	.	.
CP068017.1	-8.19051	-19.7452	0.482513	10	n/a	23	.	.	.	.	.	.	.	.	.	.	.	.	.	.	.	.	.	.	.	.	.	.	.	.	.	.	.	.	.	.	.	.	.	.	.	.	.	.	IncL/M/89.61/100/664	.	.	.	.
CP067504.1	-11.9655	-20.1014	0.567379	10	n/a	37	.	.	.	.	.	.	.	.	.	.	.	.	.	.	.	.	.	.	.	.	.	.	.	.	.	.	.	.	.	.	.	.	.	.	.	.	.	.	IncL/M(pOXA-48)/89.41/96.81/661	.	.	.	.
CP065954.1	-12.2179	-17.7756	0.84242	10	n/a	11	.	.	.	.	.	.	.	.	.	.	.	.	.	.	.	OXA-48-like	.	.	.	.	.	.	.	.	.	.	.	.	.	.	.	.	.	.	.	.	.	.	IncL/M(pOXA-48)/89.56/100/661	.	.	.	.
CP065455.1	-11.7011	-17.0461	0.712708	10	n/a	11	.	.	.	.	.	.	.	.	.	.	.	.	.	.	.	OXA-48-like	.	.	.	.	.	.	.	.	.	.	.	.	.	.	.	.	.	.	.	.	.	.	IncL/M(pOXA-48)/100/100/661	.	.	.	.
CP063280.1	-11.1764	-18.6704	1	10	n/a	23	.	.	.	.	.	.	.	.	.	.	.	.	.	.	.	OXA-48-like	.	.	.	.	.	.	.	.	.	.	.	.	.	.	.	.	.	.	.	.	.	.	IncL/M(pOXA-48)/89.56/100/661	.	.	.	.
CP063010.1	-7.9316	-19.8719	0.439215	10	n/a	11	.	.	.	.	.	CTX-M-1-like	.	.	.	.	.	.	.	.	.	.	.	.	blaCTX-M-15	.	.	.	.	.	.	.	.	.	.	.	.	.	.	.	.	.	.	.	IncL/M/89.61/100/664	.	.	.	.
CP062988.1	-11.5062	-19.0702	1	10	n/a	377	.	.	.	.	.	.	.	.	.	.	.	.	.	.	.	OXA-48-like	.	.	.	.	.	.	.	.	.	.	.	.	.	.	.	.	.	.	.	.	.	.	IncL/M(pOXA-48)/89.56/100/661	.	.	.	.
CP061978.1	-9.74096	-18.1898	0.488482	10	n/a	147	.	.	.	.	.	.	.	.	.	CTX-M-9-like	.	.	.	.	.	OXA-48-like	.	.	.	blaCTX-M-14	.	.	.	.	.	.	.	.	.	.	.	.	.	.	.	.	.	.	IncL/M(pOXA-48)/100/100/661	.	.	.	.
CP061974.1	-10.1065	-17.4537	0.497997	10	n/a	1128	.	.	.	.	.	.	.	.	.	.	.	.	.	.	.	OXA-48-like	.	.	.	.	.	.	.	.	.	.	.	.	.	.	.	.	.	.	.	.	.	.	IncL/M(pOXA-48)/100/100/661	.	.	.	.
CP061969.1	-11.6991	-19.1535	1	10	n/a	1393	.	.	.	.	.	.	.	.	.	.	.	.	.	.	.	OXA-48-like	.	.	.	.	.	.	.	.	.	.	.	.	.	.	.	.	.	.	.	.	.	.	IncL/M(pOXA-48)/99.85/99.85/661	.	.	.	.
CP061964.1	-11.2335	-18.9231	1	10	n/a	395	.	.	.	.	.	.	.	.	.	.	.	.	.	.	.	OXA-48-like	.	.	.	.	.	.	.	.	.	.	.	.	.	.	.	.	.	.	.	.	.	.	IncL/M(pOXA-48)/100/100/661	.	.	.	.
CP061958.1	-9.35903	-16.8443	0.310548	10	n/a	11	.	.	.	.	.	.	.	.	.	CTX-M-9-like	.	.	.	.	.	OXA-48-like	.	.	.	blaCTX-M-14	.	.	.	.	.	.	.	.	.	.	.	.	.	.	.	.	.	.	IncR/100/100/251	IncL/M(pOXA-48)/100/100/661	.	.	.
CP061956.1	-9.97521	-18.12	0.56287	10	n/a	11	.	.	.	.	.	.	.	.	.	.	.	.	.	.	.	OXA-48-like	.	.	.	.	.	.	.	.	.	.	.	.	.	.	.	.	.	.	.	.	.	.	IncL/M(pOXA-48)/100/100/661	.	.	.	.
CP061951.1	-9.75085	-18.2008	0.492131	10	n/a	383	.	.	.	.	.	.	.	.	.	CTX-M-9-like	.	.	.	.	.	OXA-48-like	.	.	.	blaCTX-M-14	.	.	.	.	.	.	.	.	.	.	.	.	.	.	.	.	.	.	IncL/M(pOXA-48)/100/100/661	.	.	.	.
CP053669.1	-8.01948	-20.0142	0.440875	10	n/a	37	.	.	.	.	.	CTX-M-1-like	.	.	.	.	.	.	.	.	.	.	.	.	.	.	.	.	.	.	.	.	.	.	.	.	.	.	.	.	.	.	.	.	IncL/M/100/100/664	.	.	.	.
CP053361.1	-9.10288	-18.6764	1	10	n/a	17	.	.	.	.	.	.	.	.	.	CTX-M-9-like	.	.	.	.	.	.	.	.	.	blaCTX-M-14	.	.	.	.	.	.	.	.	.	.	.	.	.	.	.	.	.	.	IncL/M(pMU407)/90.66/99.55/739	.	.	.	.
CP053038.1	-12.3463	-20.7091	0.393211	10	n/a	15	.	.	.	.	.	.	.	.	.	.	.	.	.	.	.	.	.	.	.	.	.	.	.	.	.	.	.	.	.	.	.	.	.	.	.	.	.	.	IncL/M(pOXA-48)/89.26/95.81/661	.	.	.	.
CP052472.1	-11.8306	-20.1734	1	10	n/a	789	.	.	.	.	.	.	.	.	.	.	.	.	.	.	.	.	.	.	.	.	.	.	.	.	.	.	.	.	.	.	.	.	.	.	.	.	.	.	IncL/M(pOXA-48)/89.56/100/661	.	.	.	.
CP050846.1	-11.2272	-20.7605	0.451538	10	n/a	228	.	.	.	.	.	.	.	.	.	.	.	.	.	.	.	.	.	.	.	.	.	.	.	.	.	.	.	.	.	.	.	.	.	.	.	.	.	.	IncL/M(pMU407)/100/99.59/739	.	.	.	.
CP049954.1	-11.1563	-18.5274	1	10	n/a	11	.	.	.	.	.	.	.	.	.	.	.	.	.	.	.	OXA-48-like	.	.	.	.	.	.	.	.	.	.	.	.	.	.	.	.	.	.	.	.	.	.	IncL/M(pOXA-48)/89.56/100/661	.	.	.	.
CP049951.1	-11.1563	-18.5274	1	10	n/a	11	.	.	.	.	.	.	.	.	.	.	.	.	.	.	.	OXA-48-like	.	.	.	.	.	.	.	.	.	.	.	.	.	.	.	.	.	.	.	.	.	.	IncL/M(pOXA-48)/89.56/100/661	.	.	.	.
CP049948.1	-11.1563	-18.5274	1	10	n/a	11	.	.	.	.	.	.	.	.	.	.	.	.	.	.	.	OXA-48-like	.	.	.	.	.	.	.	.	.	.	.	.	.	.	.	.	.	.	.	.	.	.	IncL/M(pOXA-48)/89.56/100/661	.	.	.	.
CP048803.1	-9.10288	-18.6764	1	10	n/a	17	.	.	.	.	.	.	.	.	.	CTX-M-9-like	.	.	.	.	.	.	.	.	.	blaCTX-M-14	.	.	.	.	.	.	.	.	.	.	.	.	.	.	.	.	.	.	IncL/M(pMU407)/90.66/99.55/739	.	.	.	.
CP048781.1	-9.10288	-18.6764	1	10	n/a	17	.	.	.	.	.	.	.	.	.	CTX-M-9-like	.	.	.	.	.	.	.	.	.	blaCTX-M-14	.	.	.	.	.	.	.	.	.	.	.	.	.	.	.	.	.	.	IncL/M(pMU407)/90.66/99.55/739	.	.	.	.
CP047704.1	-9.08419	-18.7114	0.465139	10	n/a	376	.	.	.	.	.	.	.	.	.	CTX-M-9-like	.	.	.	.	.	.	.	.	.	blaCTX-M-14	.	.	.	.	.	.	.	.	.	.	.	.	.	.	.	.	.	.	IncL/M(pMU407)/90.66/99.55/739	.	.	.	.
CP046648.1	-9.16122	-18.8241	0.500577	10	n/a	35	.	.	.	.	.	.	.	.	.	CTX-M-9-like	.	.	.	.	.	.	.	.	.	blaCTX-M-14	.	.	.	.	.	.	.	.	.	.	.	.	.	.	.	.	.	.	IncL/M(pMU407)/90.66/99.55/739	.	.	.	.
CP045017.1	-11.0895	-20.8918	0.433095	10	n/a	16	.	.	.	.	.	.	.	.	.	.	.	.	.	.	.	.	.	.	.	.	.	.	.	.	.	.	.	.	.	.	.	.	.	.	.	.	.	.	IncL/M(pOXA-48)/71.1/91.16/661	.	.	.	.
CP044032.1	-11.2276	-18.4284	1	10	n/a	-	.	.	.	.	.	.	.	.	.	.	.	.	.	.	.	OXA-48-like	.	.	.	.	.	.	.	.	.	.	.	.	.	.	.	.	.	.	.	.	.	.	IncL/M(pOXA-48)/100/100/661	.	.	.	.
CP042522.1	-7.83894	-19.813	0.420726	10	n/a	1109	.	.	.	.	.	.	.	.	.	.	.	.	.	.	.	.	.	.	.	.	.	.	.	.	.	.	.	.	.	.	.	.	.	.	.	.	.	.	IncL/M/89.61/100/664	.	.	.	.
CP041085.1	-11.218	-18.4352	0.991692	10	n/a	101	.	.	.	.	.	.	.	.	.	.	.	.	.	.	.	OXA-48-like	.	.	.	.	.	.	.	.	.	.	.	.	.	.	.	.	.	.	.	.	.	.	IncL/M(pOXA-48)/89.56/100/661	.	.	.	.
CP040036.1	-12.1267	-17.7387	1	10	n/a	11	.	.	.	.	.	.	.	.	.	.	.	.	.	.	.	OXA-48-like	.	.	.	.	.	.	.	.	.	.	.	.	.	.	.	.	.	.	.	.	.	.	IncL/M(pOXA-48)/89.56/100/661	.	.	.	.
CP040031.1	-12.1208	-17.8663	0.972814	10	n/a	11	.	.	.	.	.	.	.	.	.	.	.	.	.	.	.	OXA-48-like	.	.	.	.	.	.	.	.	.	.	.	.	.	.	.	.	.	.	.	.	.	.	IncL/M(pOXA-48)/89.56/100/661	.	.	.	.
CP039962.1	-11.1563	-18.5274	1	10	n/a	11	.	.	.	.	.	.	.	.	.	.	.	.	.	.	.	OXA-48-like	.	.	.	.	.	.	.	.	.	.	.	.	.	.	.	.	.	.	.	.	.	.	IncL/M(pOXA-48)/89.56/100/661	.	.	.	.
CP039959.1	-11.1563	-18.5274	1	10	n/a	11	.	.	.	.	.	.	.	.	.	.	.	.	.	.	.	OXA-48-like	.	.	.	.	.	.	.	.	.	.	.	.	.	.	.	.	.	.	.	.	.	.	IncL/M(pOXA-48)/89.56/100/661	.	.	.	.
CP039956.1	-11.1563	-18.5274	1	10	n/a	307	.	.	.	.	.	.	.	.	.	.	.	.	.	.	.	OXA-48-like	.	.	.	.	.	.	.	.	.	.	.	.	.	.	.	.	.	.	.	.	.	.	IncL/M(pOXA-48)/89.56/100/661	.	.	.	.
CP039953.1	-11.1563	-18.5274	1	10	n/a	307	.	.	.	.	.	.	.	.	.	.	.	.	.	.	.	OXA-48-like	.	.	.	.	.	.	.	.	.	.	.	.	.	.	.	.	.	.	.	.	.	.	IncL/M(pOXA-48)/89.56/100/661	.	.	.	.
CP039950.1	-11.1563	-18.5274	1	10	n/a	11	.	.	.	.	.	.	.	.	.	.	.	.	.	.	.	OXA-48-like	.	.	.	.	.	.	.	.	.	.	.	.	.	.	.	.	.	.	.	.	.	.	IncL/M(pOXA-48)/89.56/100/661	.	.	.	.
CP039947.1	-11.1563	-18.5274	1	10	n/a	11	.	.	.	.	.	.	.	.	.	.	.	.	.	.	.	OXA-48-like	.	.	.	.	.	.	.	.	.	.	.	.	.	.	.	.	.	.	.	.	.	.	IncL/M(pOXA-48)/89.56/100/661	.	.	.	.
CP039944.1	-11.1563	-18.5274	1	10	n/a	11	.	.	.	.	.	.	.	.	.	.	.	.	.	.	.	OXA-48-like	.	.	.	.	.	.	.	.	.	.	.	.	.	.	.	.	.	.	.	.	.	.	IncL/M(pOXA-48)/89.56/100/661	.	.	.	.
CP039941.1	-11.1563	-18.5274	1	10	n/a	11	.	.	.	.	.	.	.	.	.	.	.	.	.	.	.	OXA-48-like	.	.	.	.	.	.	.	.	.	.	.	.	.	.	.	.	.	.	.	.	.	.	IncL/M(pOXA-48)/89.56/100/661	.	.	.	.
CP039938.1	-11.1563	-18.5274	1	10	n/a	11	.	.	.	.	.	.	.	.	.	.	.	.	.	.	.	OXA-48-like	.	.	.	.	.	.	.	.	.	.	.	.	.	.	.	.	.	.	.	.	.	.	IncL/M(pOXA-48)/89.56/100/661	.	.	.	.
CP034283.1	-11.4688	-18.8383	1	10	n/a	307	.	.	.	.	.	.	.	.	.	.	.	.	.	.	.	OXA-48-like	.	.	.	.	.	.	.	.	.	.	.	.	.	.	.	.	.	.	.	.	.	.	IncL/M(pOXA-48)/89.56/100/661	.	.	.	.
CP034202.2	-9.69022	-18.1669	1	10	n/a	383	.	.	.	.	.	.	.	.	.	CTX-M-9-like	.	.	.	.	.	OXA-48-like	.	.	.	blaCTX-M-14	.	.	.	.	.	.	.	.	.	.	.	.	.	.	.	.	.	.	IncL/M(pOXA-48)/77.46/100/661	.	.	.	.
CP034041.1	-12.183	-17.8676	0.949518	10	n/a	395	.	.	.	.	.	.	.	.	.	.	.	.	.	.	.	OXA-48-like	.	.	.	.	.	.	.	.	.	.	.	.	.	.	.	.	.	.	.	.	.	.	IncL/M(pOXA-48)/89.56/100/661	.	.	.	.
CP032174.1	-11.2405	-18.4561	1	10	n/a	36	.	.	.	.	.	.	.	.	.	.	.	.	.	.	.	OXA-48-like	.	.	.	.	.	.	.	.	.	.	.	.	.	.	.	.	.	.	.	.	.	.	IncL/M(pOXA-48)/100/100/661	.	.	.	.
CP032170.1	-10.4715	-21.7354	0.342787	10	n/a	2938	.	.	.	.	.	.	.	.	.	.	.	.	.	.	.	.	.	SHV-like	.	.	.	.	.	.	.	.	.	.	.	.	.	.	.	.	.	.	.	.	IncL/M(pMU407)/100/99.46/739	.	.	.	.
CP031805.1	-12.0786	-17.8372	0.959016	10	n/a	231	.	.	.	.	.	.	.	.	.	.	.	.	.	.	.	OXA-48-like	.	.	.	.	.	.	.	.	.	.	.	.	.	.	.	.	.	.	.	.	.	.	IncL/M(pOXA-48)/89.56/100/661	.	.	.	.
CP031374.2	-11.4588	-17.811	1	10	n/a	101	.	.	.	.	.	.	.	.	.	.	.	.	.	.	.	OXA-48-like	.	.	.	.	.	.	.	.	.	.	.	.	.	.	.	.	.	.	.	.	.	.	IncL/M(pOXA-48)/100/100/661	.	.	.	.
CP030295.1	-11.8389	-20.2328	0.542169	10	n/a	11	.	.	.	.	.	.	.	.	.	.	.	.	.	.	.	.	.	.	.	.	.	.	.	.	.	.	.	.	.	.	.	.	.	.	.	.	.	.	IncL/M(pOXA-48)/89.26/97.32/661	.	.	.	.
CP030135.1	-12.081	-17.8366	0.957324	10	n/a	11	.	.	.	.	.	.	.	.	.	.	.	.	.	.	.	OXA-48-like	.	.	.	.	.	.	.	.	.	.	.	.	.	.	.	.	.	.	.	.	.	.	IncL/M(pOXA-48)/100/100/661	.	.	.	.
CP029138.1	-10.2755	-21.8674	0.339147	10	n/a	15	.	.	.	.	.	.	.	.	.	.	.	.	.	.	.	.	.	SHV-like	.	.	.	.	.	.	.	.	.	.	.	.	.	.	.	.	.	blaSHV-7	.	.	IncL/M(pMU407)/100/99.46/739	.	.	.	.
CP027699.1	-9.19273	-20.8473	0.488786	10	n/a	258	.	.	.	.	.	.	.	.	CTX-M-8-like	.	.	.	.	.	.	.	OXA-9-like	.	.	.	.	.	.	.	.	.	.	.	.	.	.	.	.	.	.	.	.	.	IncL/M(pMU407)/99.86/99.32/739	.	.	.	.
CP027154.1	-14.2352	-19.7491	0.315555	10	n/a	258	.	.	.	.	.	.	.	.	.	.	.	.	.	.	.	.	.	.	.	.	.	.	.	.	.	.	.	.	.	.	.	.	.	.	.	.	.	.	.	.	.	.	.
CP027151.1	-11.8956	-21.5638	0.312904	10	n/a	258	.	.	.	.	.	.	.	.	.	.	.	.	.	.	.	.	.	.	.	.	.	.	.	.	.	.	.	.	.	.	.	.	.	.	.	.	.	.	.	.	.	.	.
CP027148.1	-8.89378	-21.7934	0.359414	10	n/a	258	.	.	.	.	.	.	.	.	.	.	.	.	.	.	.	.	.	.	.	.	.	.	.	.	.	.	.	.	.	.	.	.	.	.	.	.	.	.	IncL/M(pMU407)/100/99.46/739	.	.	.	.
CP027039.1	-11.2288	-18.4413	0.996134	10	n/a	11	.	.	.	.	.	.	.	.	.	.	.	.	.	.	.	OXA-48-like	.	.	.	.	.	.	.	.	.	.	.	.	.	.	.	.	.	.	.	.	.	.	IncL/M(pOXA-48)/100/100/661	.	.	.	.
CP026497.1	-9.54922	-20.2238	0.476918	10	n/a	307	.	.	.	.	.	.	.	.	.	.	.	.	.	.	.	.	.	SHV-like	.	.	.	.	.	.	.	.	.	.	.	.	.	.	.	.	.	.	.	.	IncL/M(pMU407)/90.66/100/739	.	.	.	.
CP026395.1	-8.40919	-21.2361	0.404256	10	n/a	252	.	.	.	.	.	.	.	.	.	.	KPC-like	.	.	.	.	.	.	SHV-like	.	.	.	blaKPC-2	.	.	.	.	.	.	.	.	.	.	.	.	.	.	.	blaSHV-12	IncL/M(pOXA-48)/99.85/96.99/661	.	.	.	.
CP026156.1	-7.79026	-19.7004	0.396204	10	n/a	11	.	.	.	.	.	.	.	.	.	.	.	.	.	.	.	.	.	.	.	.	.	.	.	.	.	.	.	.	.	.	.	.	.	.	.	.	.	.	IncL/M/100/100/664	.	.	.	.
CP026142.1	-12.5755	-20.7356	0.376588	10	n/a	11	.	.	.	.	.	.	.	.	.	.	.	.	.	.	.	.	.	.	.	.	.	.	.	.	.	.	.	.	.	.	.	.	.	.	.	.	.	.	IncL/M/99.7/96.09/664	.	.	.	.
CP024878.1	-8.62469	-20.4995	0.488154	10	n/a	15	.	.	.	.	.	.	.	.	.	.	.	.	.	.	.	.	.	SHV-like	.	.	.	.	.	.	.	.	.	.	.	.	.	.	.	.	.	.	.	blaSHV-12	IncL/M(pOXA-48)/100/100/661	.	.	.	.
CP023419.1	-10.3561	-19.3766	0.569279	10	n/a	54	.	.	.	.	.	.	.	.	.	.	.	.	.	.	.	.	.	.	.	.	.	.	.	.	.	.	.	.	.	.	.	.	.	.	.	.	.	.	IncL/M(pOXA-48)/89.56/100/661	.	.	.	.
CP023251.1	-11.7512	-19.1238	1	10	n/a	147	.	.	.	.	.	.	.	.	.	.	.	.	.	.	.	OXA-48-like	.	.	.	.	.	.	.	.	.	.	.	.	.	.	.	.	.	.	.	.	.	.	IncL/M(pOXA-48)/100/100/661	.	.	.	.
CP021742.1	-10.2078	-21.8501	0.349409	10	n/a	45	.	.	.	.	.	.	.	.	.	.	.	.	.	OXA-1-like	.	.	.	SHV-like	.	.	.	.	.	.	.	.	.	blaOXA-1	.	.	.	.	.	.	.	.	.	.	IncL/M(pMU407)/100/99.46/739	.	.	.	.
CP020844.1	-12.2234	-18.7046	0.903291	10	n/a	37	.	.	.	.	.	.	.	.	.	.	.	.	.	.	.	OXA-48-like	.	.	.	.	.	.	.	.	.	.	.	.	.	.	.	.	.	.	.	.	.	.	IncL/M(pOXA-48)/100/100/661	.	.	.	.
CP018736.1	-11.8111	-18.5466	1	10	n/a	101	.	.	.	.	.	.	.	.	.	.	.	.	.	.	.	OXA-48-like	.	.	.	.	.	.	.	.	.	.	.	.	.	.	.	.	.	.	.	.	.	.	IncL/M(pOXA-48)/100/100/661	.	.	.	.
CP018723.1	-11.4861	-18.8135	1	10	n/a	147	.	.	.	.	.	.	.	.	.	.	.	.	.	.	.	OXA-48-like	.	.	.	.	.	.	.	.	.	.	.	.	.	.	.	.	.	.	.	.	.	.	IncL/M(pOXA-48)/100/100/661	.	.	.	.
CP018717.1	-11.8348	-18.5378	1	10	n/a	147	.	.	.	.	.	.	.	.	.	.	.	.	.	.	.	OXA-48-like	.	.	.	.	.	.	.	.	.	.	.	.	.	.	.	.	.	.	.	.	.	.	IncL/M(pOXA-48)/100/100/661	.	.	.	.
CP018712.1	-11.9787	-18.6238	1	10	n/a	147	.	.	.	.	.	.	.	.	.	.	.	.	.	.	.	OXA-48-like	.	.	.	.	.	.	.	.	.	.	.	.	.	.	.	.	.	.	.	.	.	.	IncL/M(pOXA-48)/100/100/661	.	.	.	.
CP018706.1	-11.4634	-18.8155	1	10	n/a	147	.	.	.	.	.	.	.	.	.	.	.	.	.	.	.	OXA-48-like	.	.	.	.	.	.	.	.	.	.	.	.	.	.	.	.	.	.	.	.	.	.	IncL/M(pOXA-48)/100/100/661	.	.	.	.
CP018700.1	-11.484	-18.8179	1	10	n/a	147	.	.	.	.	.	.	.	.	.	.	.	.	.	.	.	OXA-48-like	.	.	.	.	.	.	.	.	.	.	.	.	.	.	.	.	.	.	.	.	.	.	IncL/M(pOXA-48)/100/100/661	.	.	.	.
CP018694.1	-13.1891	-18.4681	0.593021	10	n/a	11	.	.	.	.	.	.	.	.	.	.	.	.	.	.	.	OXA-48-like	.	.	.	.	.	.	.	.	.	.	.	.	.	.	.	.	.	.	.	.	.	.	IncL/M(pOXA-48)/100/100/661	.	.	.	.
CP018690.1	-11.4085	-19.0013	1	10	n/a	147	.	.	.	.	.	.	.	.	.	.	.	.	.	.	.	OXA-48-like	.	.	.	.	.	.	.	.	.	.	.	.	.	.	.	.	.	.	.	.	.	.	IncL/M(pOXA-48)/100/100/661	.	.	.	.
CP018669.1	-10.2098	-21.8569	0.348402	10	n/a	244	.	.	.	.	.	.	.	.	.	.	KPC-like	.	.	.	.	.	.	SHV-like	.	.	.	blaKPC-2	.	.	.	.	.	.	.	.	.	.	.	.	.	blaSHV-7	.	.	IncL/M(pMU407)/100/99.46/739	.	.	.	.
CP018461.1	-11.2072	-18.4266	0.989731	10	n/a	15	.	.	.	.	.	.	.	.	.	.	.	.	.	.	.	OXA-48-like	.	.	.	.	.	.	.	.	.	.	.	.	.	.	.	.	.	.	.	.	.	.	IncL/M(pOXA-48)/100/100/661	.	.	.	.
CP018452.1	-8.9671	-17.9343	0.364544	10	n/a	101	.	.	.	.	.	.	.	.	.	CTX-M-9-like	.	.	.	.	.	OXA-48-like	.	.	.	blaCTX-M-14	.	.	.	.	.	.	.	.	.	.	.	.	.	.	.	.	.	.	IncL/M(pMU407)/100/99.59/739	.	.	.	.
CP018449.1	-8.95838	-17.9335	0.363301	10	n/a	101	.	.	.	.	.	.	.	.	.	CTX-M-9-like	.	.	.	.	.	OXA-48-like	.	.	.	blaCTX-M-14	.	.	.	.	.	.	.	.	.	.	.	.	.	.	.	.	.	.	IncL/M(pMU407)/100/99.59/739	.	.	.	.
CP018443.1	-13.1932	-18.4707	0.590701	10	n/a	11	.	.	.	.	.	.	.	.	.	.	.	.	.	.	.	OXA-48-like	.	.	.	.	.	.	.	.	.	.	.	.	.	.	.	.	.	.	.	.	.	.	IncL/M(pOXA-48)/100/100/661	.	.	.	.
CP018342.1	-11.2565	-18.8055	1	10	n/a	23	.	.	.	.	.	.	.	.	.	.	.	.	.	.	.	OXA-48-like	.	.	.	.	.	.	.	.	.	.	.	.	.	.	.	.	.	.	.	.	.	.	IncL/M(pOXA-48)/100/100/661	.	.	.	.
CP018315.1	-11.8513	-18.5666	1	10	n/a	147	.	.	.	.	.	.	.	.	.	.	.	.	.	.	.	OXA-48-like	.	.	.	.	.	.	.	.	.	.	.	.	.	.	.	.	.	.	.	.	.	.	IncL/M(pOXA-48)/100/100/661	.	.	.	.
CP017936.1	-10.2092	-21.8456	0.349711	10	n/a	45	.	.	.	.	.	.	.	.	.	.	.	.	.	OXA-1-like	.	.	.	SHV-like	.	.	.	.	.	.	.	.	.	blaOXA-1	.	.	.	.	.	.	.	.	.	.	IncL/M(pMU407)/100/99.46/739	.	.	.	.
CP016927.1	-9.55897	-18.2627	0.438987	10	n/a	14	.	.	.	.	.	.	.	.	.	CTX-M-9-like	.	.	.	.	.	OXA-48-like	.	.	.	blaCTX-M-14	.	.	.	.	.	.	.	.	.	.	.	.	.	.	.	.	.	.	IncL/M(pOXA-48)/100/100/661	.	.	.	.
CP014298.1	-8.0925	-19.9358	0.461466	10	n/a	11	.	.	.	.	.	CTX-M-1-like	.	.	.	.	.	.	.	OXA-1-like	.	.	.	.	.	.	.	.	.	.	.	.	.	.	.	.	.	.	.	.	.	.	.	.	IncL/M/95.78/100/664	.	.	.	.
CP007733.1	-8.41466	-21.2268	0.406064	10	n/a	34	.	.	.	.	.	.	.	.	.	.	.	.	.	.	.	.	.	SHV-like	.	.	.	.	.	.	.	.	.	.	.	.	.	.	.	.	.	.	.	blaSHV-12	IncL/M(pOXA-48)/99.85/96.99/661	.	.	.	.
AP019667.1	-9.17876	-20.7921	0.490561	10	n/a	268	.	.	.	.	.	.	.	.	.	.	.	.	.	.	.	.	.	.	.	.	.	.	.	.	.	.	.	.	.	.	.	.	.	.	.	.	.	.	IncL/M(pMU407)/90.66/99.55/739	.	.	.	.
977691_p6	-28.7854	-19.5504	1	11	Thailand	17	.	.	.	.	.	.	.	.	.	.	.	.	.	.	.	.	.	.	.	.	.	.	.	.	.	.	.	.	.	.	.	.	.	.	.	.	.	.	.	.	.	.	.
OX359185.1	-27.4026	-18.2081	0.999999	11	n/a	307	.	.	.	.	.	.	.	.	.	.	.	.	.	.	.	.	.	.	.	.	.	.	.	.	.	.	.	.	.	.	.	.	.	.	.	.	.	.	.	.	.	.	.
OX359184.1	-24.8754	-19.373	0.692509	11	n/a	307	.	.	.	.	.	.	.	.	.	.	.	.	.	.	.	.	.	.	.	.	.	.	.	.	.	.	.	.	.	.	.	.	.	.	.	.	.	.	.	.	.	.	.
OX359177.1	-24.8754	-19.3727	0.69255	11	n/a	307	.	.	.	.	.	.	.	.	.	.	.	.	.	.	.	.	.	.	.	.	.	.	.	.	.	.	.	.	.	.	.	.	.	.	.	.	.	.	.	.	.	.	.
OW970566.1	-27.4026	-18.2082	1	11	n/a	147	.	.	.	.	.	.	.	.	.	.	.	.	.	.	.	.	.	.	.	.	.	.	.	.	.	.	.	.	.	.	.	.	.	.	.	.	.	.	.	.	.	.	.
OW970558.1	-27.3714	-18.1479	1	11	n/a	147	.	.	.	.	.	.	.	.	.	.	.	.	.	.	.	.	.	.	.	.	.	.	.	.	.	.	.	.	.	.	.	.	.	.	.	.	.	.	.	.	.	.	.
OW970546.1	-27.3714	-18.1479	1	11	n/a	147	.	.	.	.	.	.	.	.	.	.	.	.	.	.	.	.	.	.	.	.	.	.	.	.	.	.	.	.	.	.	.	.	.	.	.	.	.	.	.	.	.	.	.
OW970535.1	-27.3802	-18.1562	1	11	n/a	147	.	.	.	.	.	.	.	.	.	.	.	.	.	.	.	.	.	.	.	.	.	.	.	.	.	.	.	.	.	.	.	.	.	.	.	.	.	.	.	.	.	.	.
OW970519.1	-27.3714	-18.1479	1	11	n/a	147	.	.	.	.	.	.	.	.	.	.	.	.	.	.	.	.	.	.	.	.	.	.	.	.	.	.	.	.	.	.	.	.	.	.	.	.	.	.	.	.	.	.	.
OW970498.1	-27.3714	-18.1479	1	11	n/a	147	.	.	.	.	.	.	.	.	.	.	.	.	.	.	.	.	.	.	.	.	.	.	.	.	.	.	.	.	.	.	.	.	.	.	.	.	.	.	.	.	.	.	.
OW970490.1	-27.4026	-18.2081	1	11	n/a	147	.	.	.	.	.	.	.	.	.	.	.	.	.	.	.	.	.	.	.	.	.	.	.	.	.	.	.	.	.	.	.	.	.	.	.	.	.	.	.	.	.	.	.
OW970483.1	-27.4026	-18.208	0.999961	11	n/a	147	.	.	.	.	.	.	.	.	.	.	.	.	.	.	.	.	.	.	.	.	.	.	.	.	.	.	.	.	.	.	.	.	.	.	.	.	.	.	.	.	.	.	.
OW970458.1	-27.3714	-18.1479	1	11	n/a	147	.	.	.	.	.	.	.	.	.	.	.	.	.	.	.	.	.	.	.	.	.	.	.	.	.	.	.	.	.	.	.	.	.	.	.	.	.	.	.	.	.	.	.
OW970442.1	-27.4027	-18.2081	1	11	n/a	147	.	.	.	.	.	.	.	.	.	.	.	.	.	.	.	.	.	.	.	.	.	.	.	.	.	.	.	.	.	.	.	.	.	.	.	.	.	.	.	.	.	.	.
OW970427.1	-27.3873	-18.1613	0.977824	11	n/a	147	.	.	.	.	.	.	.	.	.	.	.	.	.	.	.	.	.	.	.	.	.	.	.	.	.	.	.	.	.	.	.	.	.	.	.	.	.	.	.	.	.	.	.
OW970419.1	-27.3714	-18.1479	1	11	n/a	147	.	.	.	.	.	.	.	.	.	.	.	.	.	.	.	.	.	.	.	.	.	.	.	.	.	.	.	.	.	.	.	.	.	.	.	.	.	.	.	.	.	.	.
OW970371.1	-27.4122	-18.2174	1	11	n/a	147	.	.	.	.	.	.	.	.	.	.	.	.	.	.	.	.	.	.	.	.	.	.	.	.	.	.	.	.	.	.	.	.	.	.	.	.	.	.	.	.	.	.	.
OW970362.1	-27.4029	-18.206	0.999331	11	n/a	147	.	.	.	.	.	.	.	.	.	.	.	.	.	.	.	.	.	.	.	.	.	.	.	.	.	.	.	.	.	.	.	.	.	.	.	.	.	.	.	.	.	.	.
OW969874.1	-28.8412	-19.5003	0.996802	11	n/a	405	.	.	.	.	.	.	.	.	.	.	.	.	.	.	.	.	.	.	.	.	.	.	.	.	.	.	.	.	.	.	.	.	.	.	.	.	.	.	ColRNAI/100/90.08/130	.	.	.	.
OW968286.1	-28.8383	-19.5034	0.996837	11	n/a	405	.	.	.	.	.	.	.	.	.	.	.	.	.	.	.	.	.	.	.	.	.	.	.	.	.	.	.	.	.	.	.	.	.	.	.	.	.	.	ColRNAI/100/90.08/130	.	.	.	.
OW968068.1	-27.9813	-19.6023	1	11	n/a	1401	.	.	.	.	.	.	.	.	.	.	.	.	.	.	.	.	.	.	.	.	.	.	.	.	.	.	.	.	.	.	.	.	.	.	.	.	.	.	.	.	.	.	.
OW967821.1	-27.4026	-18.2081	1	11	n/a	147	.	.	.	.	.	.	.	.	.	.	.	.	.	.	.	.	.	.	.	.	.	.	.	.	.	.	.	.	.	.	.	.	.	.	.	.	.	.	.	.	.	.	.
OW967766.1	-28.8394	-19.5033	0.996475	11	n/a	405	.	.	.	.	.	.	.	.	.	.	.	.	.	.	.	.	.	.	.	.	.	.	.	.	.	.	.	.	.	.	.	.	.	.	.	.	.	.	ColRNAI/100/90.08/130	.	.	.	.
OW849392.1	-28.193	-19.6618	1	11	n/a	11	.	.	.	.	.	.	.	.	.	.	.	.	.	.	.	.	.	.	.	.	.	.	.	.	.	.	.	.	.	.	.	.	.	.	.	.	.	.	.	.	.	.	.
OW849287.1	-28.193	-19.6618	1	11	n/a	11	.	.	.	.	.	.	.	.	.	.	.	.	.	.	.	.	.	.	.	.	.	.	.	.	.	.	.	.	.	.	.	.	.	.	.	.	.	.	.	.	.	.	.
OW849281.1	-28.193	-19.6618	1	11	n/a	11	.	.	.	.	.	.	.	.	.	.	.	.	.	.	.	.	.	.	.	.	.	.	.	.	.	.	.	.	.	.	.	.	.	.	.	.	.	.	.	.	.	.	.
OW849254.1	-28.2724	-19.6397	1	11	n/a	11	.	.	.	.	.	.	.	.	.	.	.	.	.	.	.	.	.	.	.	.	.	.	.	.	.	.	.	.	.	.	.	.	.	.	.	.	.	.	.	.	.	.	.
OV049812.1	-28.7859	-19.854	1	11	n/a	147	.	.	.	.	.	.	.	.	.	.	.	.	.	.	.	.	.	.	.	.	.	.	.	.	.	.	.	.	.	.	.	.	.	.	.	.	.	.	.	.	.	.	.
OV049811.1	-27.4028	-18.2084	1	11	n/a	147	.	.	.	.	.	.	.	.	.	.	.	.	.	.	.	.	.	.	.	.	.	.	.	.	.	.	.	.	.	.	.	.	.	.	.	.	.	.	.	.	.	.	.
LN824137.1	-27.3714	-18.1479	1	11	n/a	147	.	.	.	.	.	.	.	.	.	.	.	.	.	.	.	.	.	.	.	.	.	.	.	.	.	.	.	.	.	.	.	.	.	.	.	.	.	.	.	.	.	.	.
CP102844.1	-29.147	-20.642	0.912253	11	n/a	1027	.	.	.	.	.	.	.	.	.	.	.	.	.	.	.	.	.	.	.	.	.	.	.	.	.	.	.	.	.	.	.	.	.	.	.	.	.	.	.	.	.	.	.
CP100083.1	-27.0563	-20.3392	0.912674	11	n/a	15	.	.	.	.	.	.	.	.	.	.	.	.	.	.	.	.	.	.	.	.	.	.	.	.	.	.	.	.	.	.	.	.	.	.	.	.	.	.	.	.	.	.	.
CP097394.1	-27.0562	-20.3391	0.91264	11	n/a	15	.	.	.	.	.	.	.	.	.	.	.	.	.	.	.	.	.	.	.	.	.	.	.	.	.	.	.	.	.	.	.	.	.	.	.	.	.	.	.	.	.	.	.
CP092800.1	-24.1514	-18.3697	0.591946	11	n/a	11	.	.	.	.	.	.	.	.	.	.	.	.	.	.	.	.	.	.	.	.	.	.	.	.	.	.	.	.	.	.	.	.	.	.	.	.	.	.	.	.	.	.	.
CP092792.1	-24.1505	-18.3702	0.591768	11	n/a	11	.	.	.	.	.	.	.	.	.	.	.	.	.	.	.	.	.	.	.	.	.	.	.	.	.	.	.	.	.	.	.	.	.	.	.	.	.	.	.	.	.	.	.
CP092343.1	-27.0564	-20.3391	0.912702	11	n/a	15	.	.	.	.	.	.	.	.	.	.	.	.	.	.	.	.	.	.	.	.	.	.	.	.	.	.	.	.	.	.	.	.	.	.	.	.	.	.	.	.	.	.	.
CP085865.1	-28.5351	-19.254	1	11	n/a	5873	.	.	.	.	.	.	.	.	.	.	.	.	.	.	.	.	.	.	.	.	.	.	.	.	.	.	.	.	.	.	.	.	.	.	.	.	.	.	.	.	.	.	.
CP083771.1	-27.4029	-18.2091	1	11	n/a	359	.	.	.	.	.	.	.	.	.	.	.	.	.	.	.	.	.	.	.	.	.	.	.	.	.	.	.	.	.	.	.	.	.	.	.	.	.	.	.	.	.	.	.
CP079813.1	-26.8414	-21.3019	0.716354	11	n/a	231	.	.	.	.	.	.	.	.	.	.	.	.	.	.	.	.	.	.	.	.	.	.	.	.	.	.	.	.	.	.	.	.	.	.	.	.	.	.	.	.	.	.	.
CP079733.1	-27.0565	-20.3392	0.912769	11	n/a	15	.	.	.	.	.	.	.	.	.	.	.	.	.	.	.	.	.	.	.	.	.	.	.	.	.	.	.	.	.	.	.	.	.	.	.	.	.	.	.	.	.	.	.
CP075556.1	-29.1465	-20.6383	0.912674	11	n/a	967	.	.	.	.	.	.	.	.	.	.	.	.	.	.	.	.	.	.	.	.	.	.	.	.	.	.	.	.	.	.	.	.	.	.	.	.	.	.	.	.	.	.	.
CP070186.1	-28.9464	-19.469	0.967028	11	n/a	628	.	.	.	.	.	.	.	.	.	.	.	.	.	.	.	.	.	.	.	.	.	.	.	.	.	.	.	.	.	.	.	.	.	.	.	.	.	.	.	.	.	.	.
CP070184.1	-28.7704	-19.487	1	11	n/a	628	.	.	.	.	.	.	.	.	.	.	.	.	.	.	.	.	.	.	.	.	.	.	.	.	.	.	.	.	.	.	.	.	.	.	.	.	.	.	.	.	.	.	.
CP070019.1	-28.8373	-19.9973	1	11	n/a	15	.	.	.	.	.	.	.	.	.	.	.	.	.	.	.	.	.	.	.	.	.	.	.	.	.	.	.	.	.	.	.	.	.	.	.	.	.	.	ColRNAI/99.23/92.48/130	.	.	.	.
CP069835.1	-28.77	-19.4871	1	11	n/a	895	.	.	.	.	.	.	.	.	.	.	.	.	.	.	.	.	.	.	.	.	.	.	.	.	.	.	.	.	.	.	.	.	.	.	.	.	.	.	.	.	.	.	.
CP069831.1	-28.8405	-19.5017	0.996568	11	n/a	895	.	.	.	.	.	.	.	.	.	.	.	.	.	.	.	.	.	.	.	.	.	.	.	.	.	.	.	.	.	.	.	.	.	.	.	.	.	.	ColRNAI/100/90.08/130	.	.	.	.
CP069209.1	-27.4029	-18.2082	1	11	n/a	147	.	.	.	.	.	.	.	.	.	.	.	.	.	.	.	.	.	.	.	.	.	.	.	.	.	.	.	.	.	.	.	.	.	.	.	.	.	.	.	.	.	.	.
CP067971.1	-24.8761	-19.3724	0.692739	11	n/a	307	.	.	.	.	.	.	.	.	.	.	.	.	.	.	.	.	.	.	.	.	.	.	.	.	.	.	.	.	.	.	.	.	.	.	.	.	.	.	.	.	.	.	.
CP067964.1	-27.3714	-18.1479	1	11	n/a	307	.	.	.	.	.	.	.	.	.	.	.	.	.	.	.	.	.	.	.	.	.	.	.	.	.	.	.	.	.	.	.	.	.	.	.	.	.	.	.	.	.	.	.
CP067477.1	-27.4027	-18.2086	1	11	n/a	307	.	.	.	.	.	.	.	.	.	.	.	.	.	.	.	.	.	.	.	.	.	.	.	.	.	.	.	.	.	.	.	.	.	.	.	.	.	.	.	.	.	.	.
CP067452.1	-27.403	-18.2098	1	11	n/a	307	.	.	.	.	.	.	.	.	.	.	.	.	.	.	.	.	.	.	.	.	.	.	.	.	.	.	.	.	.	.	.	.	.	.	.	.	.	.	.	.	.	.	.
CP067260.1	-28.5195	-19.5555	1	11	n/a	307	.	.	.	.	.	.	.	.	.	.	.	.	.	.	.	.	.	.	.	.	.	.	.	.	.	.	.	.	.	.	.	.	.	.	.	.	.	.	Col440I/96.49/93.64/114	.	.	.	.
CP058803.1	-28.6736	-19.6599	1	11	n/a	2096	.	.	.	.	.	.	.	.	.	.	.	.	.	.	.	.	.	.	.	.	.	.	.	.	.	.	.	.	.	.	.	.	.	.	.	.	.	.	.	.	.	.	.
CP055301.1	-24.1504	-18.3704	0.591752	11	n/a	11	.	.	.	.	.	.	.	.	.	.	.	.	.	.	.	.	.	.	.	.	.	.	.	.	.	.	.	.	.	.	.	.	.	.	.	.	.	.	.	.	.	.	.
CP054989.1	-29.148	-20.6418	0.911836	11	n/a	45	.	.	.	.	.	.	.	.	.	.	.	.	.	.	.	.	.	.	.	.	.	.	.	.	.	.	.	.	.	.	.	.	.	.	.	.	.	.	.	.	.	.	.
CP052322.1	-27.7059	-19.4961	1	11	n/a	14	.	.	.	.	.	.	.	.	.	.	.	.	.	.	.	.	.	.	.	.	.	.	.	.	.	.	.	.	.	.	.	.	.	.	.	.	.	.	.	.	.	.	.
CP052221.1	-27.7064	-19.4955	1	11	n/a	15	.	.	.	.	.	.	.	.	.	.	.	.	.	.	.	.	.	.	.	.	.	.	.	.	.	.	.	.	.	.	.	.	.	.	.	.	.	.	.	.	.	.	.
CP050369.1	-27.4029	-18.2093	1	11	n/a	147	.	.	.	.	.	.	.	.	.	.	.	.	.	.	.	.	.	.	.	.	.	.	.	.	.	.	.	.	.	.	.	.	.	.	.	.	.	.	.	.	.	.	.
CP045683.1	-27.0564	-20.3392	0.912714	11	n/a	15	.	.	.	.	.	.	.	.	.	.	.	.	.	.	.	.	.	.	.	.	.	.	.	.	.	.	.	.	.	.	.	.	.	.	.	.	.	.	.	.	.	.	.
CP041097.1	-28.2724	-19.6406	1	11	n/a	3541	.	.	.	.	.	.	.	.	.	.	.	.	.	.	.	.	.	.	.	.	.	.	.	.	.	.	.	.	.	.	.	.	.	.	.	.	.	.	.	.	.	.	.
CP024434.1	-27.4028	-18.2084	1	11	n/a	147	.	.	.	.	.	.	.	.	.	.	.	.	.	.	.	.	.	.	.	.	.	.	.	.	.	.	.	.	.	.	.	.	.	.	.	.	.	.	.	.	.	.	.
977691_p5	-2.68672	-51.1127	0.742399	12	Thailand	17	.	.	.	.	.	.	.	.	.	.	.	.	.	.	.	.	.	.	.	.	.	.	.	.	.	.	.	.	.	.	.	.	.	.	.	.	.	.	ColRNAI/100/97.69/130	.	.	.	.
480738_p4	-3.55186	-49.7667	0.576943	12	Thailand	45	.	.	.	.	.	.	.	.	.	.	.	.	.	.	.	.	.	.	.	.	.	.	.	.	.	.	.	.	.	.	.	.	.	.	.	.	.	.	ColRNAI/100/99.23/130	.	.	.	.
OW969951.1	-7.28915	-52.4512	0.771788	12	n/a	15	.	.	.	.	.	.	.	.	.	.	.	.	.	.	.	.	.	.	.	.	.	.	.	.	.	.	.	.	.	.	.	.	.	.	.	.	.	.	ColRNAI/100/99.23/130	.	.	.	.
OW969944.1	-7.29667	-52.4616	0.766771	12	n/a	11	.	.	.	.	.	.	.	.	.	.	.	.	.	.	.	.	.	.	.	.	.	.	.	.	.	.	.	.	.	.	.	.	.	.	.	.	.	.	ColRNAI/100/99.23/130	.	.	.	.
OW969838.1	-7.2834	-52.4555	0.77504	12	n/a	15	.	.	.	.	.	.	.	.	.	.	.	.	.	.	.	.	.	.	.	.	.	.	.	.	.	.	.	.	.	.	.	.	.	.	.	.	.	.	ColRNAI/100/99.23/130	.	.	.	.
OW969824.1	-8.69225	-53.7892	0.364385	12	n/a	11	.	.	.	.	.	.	.	.	.	.	.	.	.	.	.	.	.	.	.	.	.	.	.	.	.	.	.	.	.	.	.	.	.	.	.	.	.	.	.	.	.	.	.
OW968428.1	-3.12077	-49.0047	0.540256	12	n/a	13	.	.	.	.	.	.	.	.	.	.	.	.	.	.	.	.	.	.	.	.	.	.	.	.	.	.	.	.	.	.	.	.	.	.	.	.	.	.	ColRNAI/73.85/98.96/130	.	.	.	.
CP122392.1	-2.98283	-50.5587	0.692178	12	n/a	866	.	.	.	.	.	.	.	.	.	.	.	.	.	.	.	.	.	.	.	.	.	.	.	.	.	.	.	.	.	.	.	.	.	.	.	.	.	.	ColRNAI/100/98.46/130	.	.	.	.
CP119175.1	-5.70127	-52.9045	1	12	n/a	11	.	.	.	.	.	.	.	.	.	.	.	.	.	.	.	.	.	.	.	.	.	.	.	.	.	.	.	.	.	.	.	.	.	.	.	.	.	.	ColRNAI/100/98.46/130	.	.	.	.
CP119015.1	-6.27362	-52.3236	1	12	n/a	11	.	.	.	.	.	.	.	.	.	.	.	.	.	.	.	.	.	.	.	.	.	.	.	.	.	.	.	.	.	.	.	.	.	.	.	.	.	.	ColRNAI/100/98.46/130	.	.	.	.
CP116907.1	-5.70253	-52.9025	1	12	n/a	11	.	.	.	.	.	.	.	.	.	.	.	.	.	.	.	.	.	.	.	.	.	.	.	.	.	.	.	.	.	.	.	.	.	.	.	.	.	.	ColRNAI/100/98.46/130	ColRNAI/100/98.46/130	.	.	.
CP114856.1	-8.74015	-53.7909	0.358592	12	n/a	307	.	.	.	.	.	.	.	.	.	.	.	.	.	.	.	.	.	.	.	.	.	.	.	.	.	.	.	.	.	.	.	.	.	.	.	.	.	.	.	.	.	.	.
CP109989.1	-4.52415	-51.4797	1	12	n/a	15	.	.	.	.	.	.	.	.	.	.	.	.	.	.	.	.	.	.	.	.	.	.	.	.	.	.	.	.	.	.	.	.	.	.	.	.	.	.	ColRNAI/100/98.46/130	.	.	.	.
CP109977.1	-5.70127	-52.9045	1	12	n/a	11	.	.	.	.	.	.	.	.	.	.	.	.	.	.	.	.	.	.	.	.	.	.	.	.	.	.	.	.	.	.	.	.	.	.	.	.	.	.	ColRNAI/100/98.46/130	.	.	.	.
CP109952.1	-5.70881	-52.8895	1	12	n/a	751	.	.	.	.	.	.	.	.	.	.	.	.	.	.	.	.	.	.	.	.	.	.	.	.	.	.	.	.	.	.	.	.	.	.	.	.	.	.	ColRNAI/100/98.46/130	ColRNAI/100/98.46/130	.	.	.
CP107521.1	-4.39921	-51.9553	1	12	n/a	11	.	.	.	.	.	.	.	.	.	.	.	.	.	.	.	.	.	.	.	.	.	.	.	.	.	.	.	.	.	.	.	.	.	.	.	.	.	.	ColRNAI/100/98.46/130	.	.	.	.
CP107516.1	-6.24212	-52.2837	1	12	n/a	11	.	.	.	.	.	.	.	.	.	.	.	.	.	.	.	.	.	.	.	.	.	.	.	.	.	.	.	.	.	.	.	.	.	.	.	.	.	.	ColRNAI/100/98.46/130	.	.	.	.
CP107511.1	-4.39836	-51.9567	1	12	n/a	11	.	.	.	.	.	.	.	.	.	.	.	.	.	.	.	.	.	.	.	.	.	.	.	.	.	.	.	.	.	.	.	.	.	.	.	.	.	.	ColRNAI/100/98.46/130	.	.	.	.
CP107506.1	-4.39836	-51.9567	1	12	n/a	11	.	.	.	.	.	.	.	.	.	.	.	.	.	.	.	.	.	.	.	.	.	.	.	.	.	.	.	.	.	.	.	.	.	.	.	.	.	.	ColRNAI/100/98.46/130	.	.	.	.
CP107501.1	-4.39921	-51.9553	1	12	n/a	11	.	.	.	.	.	.	.	.	.	.	.	.	.	.	.	.	.	.	.	.	.	.	.	.	.	.	.	.	.	.	.	.	.	.	.	.	.	.	ColRNAI/100/98.46/130	.	.	.	.
CP107496.1	-4.39836	-51.9567	1	12	n/a	11	.	.	.	.	.	.	.	.	.	.	.	.	.	.	.	.	.	.	.	.	.	.	.	.	.	.	.	.	.	.	.	.	.	.	.	.	.	.	ColRNAI/100/98.46/130	.	.	.	.
CP107491.1	-4.39921	-51.9553	1	12	n/a	11	.	.	.	.	.	.	.	.	.	.	.	.	.	.	.	.	.	.	.	.	.	.	.	.	.	.	.	.	.	.	.	.	.	.	.	.	.	.	ColRNAI/100/98.46/130	.	.	.	.
CP107486.1	-4.39836	-51.9567	1	12	n/a	11	.	.	.	.	.	.	.	.	.	.	.	.	.	.	.	.	.	.	.	.	.	.	.	.	.	.	.	.	.	.	.	.	.	.	.	.	.	.	ColRNAI/100/98.46/130	.	.	.	.
CP107481.1	-4.39836	-51.9567	1	12	n/a	11	.	.	.	.	.	.	.	.	.	.	.	.	.	.	.	.	.	.	.	.	.	.	.	.	.	.	.	.	.	.	.	.	.	.	.	.	.	.	ColRNAI/100/98.46/130	.	.	.	.
CP107476.1	-4.39921	-51.9553	1	12	n/a	11	.	.	.	.	.	.	.	.	.	.	.	.	.	.	.	.	.	.	.	.	.	.	.	.	.	.	.	.	.	.	.	.	.	.	.	.	.	.	ColRNAI/100/98.46/130	.	.	.	.
CP107471.1	-4.39836	-51.9567	1	12	n/a	11	.	.	.	.	.	.	.	.	.	.	.	.	.	.	.	.	.	.	.	.	.	.	.	.	.	.	.	.	.	.	.	.	.	.	.	.	.	.	ColRNAI/100/98.46/130	.	.	.	.
CP107466.1	-6.26976	-52.3193	1	12	n/a	11	.	.	.	.	.	.	.	.	.	.	.	.	.	.	.	.	.	.	.	.	.	.	.	.	.	.	.	.	.	.	.	.	.	.	.	.	.	.	ColRNAI/100/98.46/130	.	.	.	.
CP107461.1	-4.39836	-51.9567	1	12	n/a	11	.	.	.	.	.	.	.	.	.	.	.	.	.	.	.	.	.	.	.	.	.	.	.	.	.	.	.	.	.	.	.	.	.	.	.	.	.	.	ColRNAI/100/98.46/130	.	.	.	.
CP107456.1	-6.23908	-52.2824	1	12	n/a	11	.	.	.	.	.	.	.	.	.	.	.	.	.	.	.	.	.	.	.	.	.	.	.	.	.	.	.	.	.	.	.	.	.	.	.	.	.	.	ColRNAI/100/98.46/130	.	.	.	.
CP107450.1	-4.39836	-51.9567	1	12	n/a	11	.	.	.	.	.	.	.	.	.	.	.	.	.	.	.	.	.	.	.	.	.	.	.	.	.	.	.	.	.	.	.	.	.	.	.	.	.	.	ColRNAI/100/98.46/130	.	.	.	.
CP107445.1	-4.39836	-51.9567	1	12	n/a	11	.	.	.	.	.	.	.	.	.	.	.	.	.	.	.	.	.	.	.	.	.	.	.	.	.	.	.	.	.	.	.	.	.	.	.	.	.	.	ColRNAI/100/98.46/130	.	.	.	.
CP107439.1	-4.39836	-51.9567	1	12	n/a	11	.	.	.	.	.	.	.	.	.	.	.	.	.	.	.	.	.	.	.	.	.	.	.	.	.	.	.	.	.	.	.	.	.	.	.	.	.	.	ColRNAI/100/98.46/130	.	.	.	.
CP107435.1	-4.39836	-51.9567	1	12	n/a	11	.	.	.	.	.	.	.	.	.	.	.	.	.	.	.	.	.	.	.	.	.	.	.	.	.	.	.	.	.	.	.	.	.	.	.	.	.	.	ColRNAI/100/98.46/130	.	.	.	.
CP107430.1	-4.39921	-51.9553	1	12	n/a	11	.	.	.	.	.	.	.	.	.	.	.	.	.	.	.	.	.	.	.	.	.	.	.	.	.	.	.	.	.	.	.	.	.	.	.	.	.	.	ColRNAI/100/98.46/130	.	.	.	.
CP107424.1	-4.39836	-51.9567	1	12	n/a	11	.	.	.	.	.	.	.	.	.	.	.	.	.	.	.	.	.	.	.	.	.	.	.	.	.	.	.	.	.	.	.	.	.	.	.	.	.	.	ColRNAI/100/98.46/130	.	.	.	.
CP107420.1	-4.39836	-51.9567	1	12	n/a	11	.	.	.	.	.	.	.	.	.	.	.	.	.	.	.	.	.	.	.	.	.	.	.	.	.	.	.	.	.	.	.	.	.	.	.	.	.	.	ColRNAI/100/98.46/130	.	.	.	.
CP107415.1	-4.39836	-51.9567	1	12	n/a	11	.	.	.	.	.	.	.	.	.	.	.	.	.	.	.	.	.	.	.	.	.	.	.	.	.	.	.	.	.	.	.	.	.	.	.	.	.	.	ColRNAI/100/98.46/130	.	.	.	.
CP107410.1	-6.26976	-52.3193	1	12	n/a	11	.	.	.	.	.	.	.	.	.	.	.	.	.	.	.	.	.	.	.	.	.	.	.	.	.	.	.	.	.	.	.	.	.	.	.	.	.	.	ColRNAI/100/98.46/130	.	.	.	.
CP107406.1	-4.39921	-51.9553	1	12	n/a	11	.	.	.	.	.	.	.	.	.	.	.	.	.	.	.	.	.	.	.	.	.	.	.	.	.	.	.	.	.	.	.	.	.	.	.	.	.	.	ColRNAI/100/98.46/130	.	.	.	.
CP107401.1	-4.39836	-51.9567	1	12	n/a	11	.	.	.	.	.	.	.	.	.	.	.	.	.	.	.	.	.	.	.	.	.	.	.	.	.	.	.	.	.	.	.	.	.	.	.	.	.	.	ColRNAI/100/98.46/130	.	.	.	.
CP107396.1	-4.39921	-51.9553	1	12	n/a	11	.	.	.	.	.	.	.	.	.	.	.	.	.	.	.	.	.	.	.	.	.	.	.	.	.	.	.	.	.	.	.	.	.	.	.	.	.	.	ColRNAI/100/98.46/130	.	.	.	.
CP107392.1	-4.39921	-51.9553	1	12	n/a	11	.	.	.	.	.	.	.	.	.	.	.	.	.	.	.	.	.	.	.	.	.	.	.	.	.	.	.	.	.	.	.	.	.	.	.	.	.	.	ColRNAI/100/98.46/130	.	.	.	.
CP107388.1	-6.23689	-52.2826	1	12	n/a	11	.	.	.	.	.	.	.	.	.	.	.	.	.	.	.	.	.	.	.	.	.	.	.	.	.	.	.	.	.	.	.	.	.	.	.	.	.	.	ColRNAI/100/98.46/130	.	.	.	.
CP107381.1	-4.39836	-51.9567	1	12	n/a	11	.	.	.	.	.	.	.	.	.	.	.	.	.	.	.	.	.	.	.	.	.	.	.	.	.	.	.	.	.	.	.	.	.	.	.	.	.	.	ColRNAI/100/98.46/130	.	.	.	.
CP107377.1	-5.09329	-52.0246	1	12	n/a	11	.	.	.	.	.	.	.	.	.	.	.	.	.	.	.	.	.	.	.	.	.	.	.	.	.	.	.	.	.	.	.	.	.	.	.	.	.	.	ColRNAI/100/98.46/130	.	.	.	.
CP107369.1	-6.24212	-52.2837	1	12	n/a	11	.	.	.	.	.	.	.	.	.	.	.	.	.	.	.	.	.	.	.	.	.	.	.	.	.	.	.	.	.	.	.	.	.	.	.	.	.	.	ColRNAI/100/98.46/130	.	.	.	.
CP107365.1	-4.39921	-51.9553	1	12	n/a	11	.	.	.	.	.	.	.	.	.	.	.	.	.	.	.	.	.	.	.	.	.	.	.	.	.	.	.	.	.	.	.	.	.	.	.	.	.	.	ColRNAI/100/98.46/130	.	.	.	.
CP107361.1	-4.39836	-51.9567	1	12	n/a	11	.	.	.	.	.	.	.	.	.	.	.	.	.	.	.	.	.	.	.	.	.	.	.	.	.	.	.	.	.	.	.	.	.	.	.	.	.	.	ColRNAI/100/98.46/130	.	.	.	.
CP107357.1	-4.39921	-51.9553	1	12	n/a	1049	.	.	.	.	.	.	.	.	.	.	.	.	.	.	.	.	.	.	.	.	.	.	.	.	.	.	.	.	.	.	.	.	.	.	.	.	.	.	ColRNAI/100/98.46/130	.	.	.	.
CP107350.1	-5.70158	-52.9038	1	12	n/a	11	.	.	.	.	.	.	.	.	.	.	.	.	.	.	.	.	.	.	.	.	.	.	.	.	.	.	.	.	.	.	.	.	.	.	.	.	.	.	ColRNAI/100/98.46/130	.	.	.	.
CP107343.1	-4.39921	-51.9553	1	12	n/a	11	.	.	.	.	.	.	.	.	.	.	.	.	.	.	.	.	.	.	.	.	.	.	.	.	.	.	.	.	.	.	.	.	.	.	.	.	.	.	ColRNAI/100/98.46/130	.	.	.	.
CP107339.1	-5.70158	-52.9038	1	12	n/a	11	.	.	.	.	.	.	.	.	.	.	.	.	.	.	.	.	.	.	.	.	.	.	.	.	.	.	.	.	.	.	.	.	.	.	.	.	.	.	ColRNAI/100/98.46/130	.	.	.	.
CP107332.1	-6.23689	-52.2826	1	12	n/a	11	.	.	.	.	.	.	.	.	.	.	.	.	.	.	.	.	.	.	.	.	.	.	.	.	.	.	.	.	.	.	.	.	.	.	.	.	.	.	ColRNAI/100/98.46/130	.	.	.	.
CP107325.1	-6.2338	-52.282	1	12	n/a	11	.	.	.	.	.	.	.	.	.	.	.	.	.	.	.	.	.	.	.	.	.	.	.	.	.	.	.	.	.	.	.	.	.	.	.	.	.	.	ColRNAI/100/98.46/130	.	.	.	.
CP107318.1	-6.23197	-52.2818	1	12	n/a	11	.	.	.	.	.	.	.	.	.	.	.	.	.	.	.	.	.	.	.	.	.	.	.	.	.	.	.	.	.	.	.	.	.	.	.	.	.	.	ColRNAI/100/98.46/130	.	.	.	.
CP107310.1	-6.24212	-52.2837	1	12	n/a	11	.	.	.	.	.	.	.	.	.	.	.	.	.	.	.	.	.	.	.	.	.	.	.	.	.	.	.	.	.	.	.	.	.	.	.	.	.	.	ColRNAI/100/98.46/130	.	.	.	.
CP107306.1	-4.39921	-51.9553	1	12	n/a	11	.	.	.	.	.	.	.	.	.	.	.	.	.	.	.	.	.	.	.	.	.	.	.	.	.	.	.	.	.	.	.	.	.	.	.	.	.	.	ColRNAI/100/98.46/130	.	.	.	.
CP107301.1	-5.70158	-52.9038	1	12	n/a	11	.	.	.	.	.	.	.	.	.	.	.	.	.	.	.	.	.	.	.	.	.	.	.	.	.	.	.	.	.	.	.	.	.	.	.	.	.	.	ColRNAI/100/98.46/130	.	.	.	.
CP107295.1	-5.70283	-52.902	1	12	n/a	11	.	.	.	.	.	.	.	.	.	.	.	.	.	.	.	.	.	.	.	.	.	.	.	.	.	.	.	.	.	.	.	.	.	.	.	.	.	.	ColRNAI/100/98.46/130	.	.	.	.
CP107018.1	-6.27138	-52.3222	1	12	n/a	11	.	.	.	.	.	.	.	.	.	.	.	.	.	.	.	.	.	.	.	.	.	.	.	.	.	.	.	.	.	.	.	.	.	.	.	.	.	.	ColRNAI/100/98.46/130	.	.	.	.
CP106911.1	-4.39884	-51.9559	1	12	n/a	11	.	.	.	.	.	.	.	.	.	.	.	.	.	.	.	.	.	.	.	.	.	.	.	.	.	.	.	.	.	.	.	.	.	.	.	.	.	.	ColRNAI/100/98.46/130	.	.	.	.
CP104313.1	-6.8894	-53.5512	0.740703	12	n/a	751	.	.	.	.	.	.	.	.	.	.	.	.	.	.	.	.	.	.	.	.	.	.	.	.	.	.	.	.	.	.	.	.	.	.	.	.	.	.	.	.	.	.	.
CP104033.1	-4.46166	-51.8049	1	12	n/a	11	.	.	.	.	.	.	.	.	.	.	.	.	.	.	.	.	.	.	.	.	.	.	.	.	.	.	.	.	.	.	.	.	.	.	.	.	.	.	ColRNAI/100/98.46/130	.	.	.	.
CP103620.1	-3.11917	-49.0001	0.541669	12	n/a	15	.	.	.	.	.	.	.	.	.	.	.	.	.	.	.	.	.	.	.	.	.	.	.	.	.	.	.	.	.	.	.	.	.	.	.	.	.	.	ColRNAI/100/97.71/130	.	.	.	.
CP103506.1	-2.95151	-47.1815	0.373611	12	n/a	14	.	.	.	.	.	.	.	.	.	.	.	.	.	.	.	.	.	.	.	.	.	.	.	.	.	.	.	.	.	.	.	.	.	.	.	.	.	.	ColRNAI/100/96.95/130	.	.	.	.
CP103321.1	-5.68759	-52.9382	1	12	n/a	11	.	.	.	.	.	.	.	.	.	.	.	.	.	.	.	.	.	.	.	.	.	.	.	.	.	.	.	.	.	.	.	.	.	.	.	.	.	.	ColRNAI/100/98.46/130	.	.	.	.
CP102843.1	-2.6776	-51.1228	0.742958	12	n/a	1027	.	.	.	.	.	.	.	.	.	.	.	.	.	.	.	.	.	.	.	.	.	.	.	.	.	.	.	.	.	.	.	.	.	.	.	.	.	.	ColRNAI/100/97.69/130	ColRNAI/100/97.69/130	.	.	.
CP102840.1	-5.71017	-52.8843	1	12	n/a	751	.	.	.	.	.	.	.	.	.	.	.	.	.	.	.	.	.	.	.	.	.	.	.	.	.	.	.	.	.	.	.	.	.	.	.	.	.	.	ColRNAI/100/98.46/130	ColRNAI/100/98.46/130	.	.	.
CP102395.1	-4.70484	-52.2538	1	12	n/a	11	.	.	.	.	.	.	.	.	.	.	.	.	.	.	.	.	.	.	.	.	.	.	.	.	.	.	.	.	.	.	.	.	.	.	.	.	.	.	ColRNAI/100/98.46/130	.	.	.	.
CP102195.1	-5.70127	-52.9045	1	12	n/a	11	.	.	.	.	.	.	.	.	.	.	.	.	.	.	.	.	.	.	.	.	.	.	.	.	.	.	.	.	.	.	.	.	.	.	.	.	.	.	ColRNAI/100/98.46/130	.	.	.	.
CP102189.1	-5.69833	-52.9505	1	12	n/a	11	.	.	.	.	.	.	.	.	.	.	.	.	.	.	.	.	.	.	.	.	.	.	.	.	.	.	.	.	.	.	.	.	.	.	.	.	.	.	ColRNAI/100/98.46/130	.	.	.	.
CP101787.1	-6.27362	-52.3236	1	12	n/a	11	.	.	.	.	.	.	.	.	.	.	.	.	.	.	.	.	.	.	.	.	.	.	.	.	.	.	.	.	.	.	.	.	.	.	.	.	.	.	ColRNAI/100/98.46/130	.	.	.	.
CP101781.1	-6.27362	-52.3236	1	12	n/a	11	.	.	.	.	.	.	.	.	.	.	.	.	.	.	.	.	.	.	.	.	.	.	.	.	.	.	.	.	.	.	.	.	.	.	.	.	.	.	ColRNAI/100/98.46/130	.	.	.	.
CP101773.1	-6.26678	-52.3107	1	12	n/a	11	.	.	.	.	.	.	.	.	.	.	.	.	.	.	.	.	.	.	.	.	.	.	.	.	.	.	.	.	.	.	.	.	.	.	.	.	.	.	ColRNAI/100/98.46/130	.	.	.	.
CP101768.1	-5.70127	-52.9045	1	12	n/a	11	.	.	.	.	.	.	.	.	.	.	.	.	.	.	.	.	.	.	.	.	.	.	.	.	.	.	.	.	.	.	.	.	.	.	.	.	.	.	ColRNAI/100/98.46/130	.	.	.	.
CP101729.1	-4.46166	-51.8049	1	12	n/a	11	.	.	.	.	.	.	.	.	.	.	.	.	.	.	.	.	.	.	.	.	.	.	.	.	.	.	.	.	.	.	.	.	.	.	.	.	.	.	ColRNAI/100/98.46/130	.	.	.	.
CP101570.1	-4.39884	-51.9559	1	12	n/a	11	.	.	.	.	.	.	.	.	.	.	.	.	.	.	.	.	.	.	.	.	.	.	.	.	.	.	.	.	.	.	.	.	.	.	.	.	.	.	ColRNAI/100/98.46/130	.	.	.	.
CP101565.1	-3.74292	-51.7401	1	12	n/a	11	.	.	.	.	.	.	.	.	.	.	.	.	.	.	.	.	.	.	.	.	.	.	.	.	.	.	.	.	.	.	.	.	.	.	.	.	.	.	ColRNAI/100/98.46/130	.	.	.	.
CP101544.1	-4.39819	-51.9569	1	12	n/a	11	.	.	.	.	.	.	.	.	.	.	.	.	.	.	.	.	.	.	.	.	.	.	.	.	.	.	.	.	.	.	.	.	.	.	.	.	.	.	ColRNAI/100/98.46/130	.	.	.	.
CP101535.1	-4.39921	-51.9553	1	12	n/a	11	.	.	.	.	.	.	.	.	.	.	.	.	.	.	.	.	.	.	.	.	.	.	.	.	.	.	.	.	.	.	.	.	.	.	.	.	.	.	ColRNAI/100/98.46/130	.	.	.	.
CP100117.1	-4.06102	-52.4659	1	12	n/a	15	.	.	.	.	.	.	.	.	.	.	.	.	.	.	.	.	.	.	.	.	.	.	.	.	.	.	.	.	.	.	.	.	.	.	.	.	.	.	ColRNAI/99.23/95.49/130	.	.	.	.
CP100091.1	-4.39921	-51.9553	1	12	n/a	15	.	.	.	.	.	.	.	.	.	.	.	.	.	.	.	.	.	.	.	.	.	.	.	.	.	.	.	.	.	.	.	.	.	.	.	.	.	.	ColRNAI/100/98.46/130	.	.	.	.
CP100080.1	-2.94836	-47.1607	1	12	n/a	15	.	.	.	.	.	.	.	.	.	.	.	.	.	.	.	.	.	.	.	.	.	.	.	.	.	.	.	.	.	.	.	.	.	.	.	.	.	.	ColRNAI/100/96.95/130	.	.	.	.
CP099525.1	-4.39972	-51.9545	1	12	n/a	11	.	.	.	.	.	.	.	.	.	.	.	.	.	.	.	.	.	.	.	.	.	.	.	.	.	.	.	.	.	.	.	.	.	.	.	.	.	.	ColRNAI/100/98.46/130	.	.	.	.
CP099417.1	-5.69046	-52.9301	1	12	n/a	11	.	.	.	.	.	.	.	.	.	.	.	.	.	.	.	.	.	.	.	.	.	.	.	.	.	.	.	.	.	.	.	.	.	.	.	.	.	.	ColRNAI/100/98.46/130	.	.	.	.
CP098761.1	-4.39857	-51.9563	1	12	n/a	45	.	.	.	.	.	.	.	.	.	.	.	.	.	.	.	.	.	.	.	.	.	.	.	.	.	.	.	.	.	.	.	.	.	.	.	.	.	.	ColRNAI/100/98.46/130	.	.	.	.
CP098173.1	-8.70055	-53.7907	0.363298	12	n/a	392	.	.	.	.	.	.	.	.	.	.	.	.	.	.	.	.	.	.	.	.	.	.	.	.	.	.	.	.	.	.	.	.	.	.	.	.	.	.	.	.	.	.	.
CP097700.1	-7.49865	-52.5342	0.667036	12	n/a	11	.	.	.	.	.	.	.	.	.	.	.	.	.	.	.	.	.	.	.	.	.	.	.	.	.	.	.	.	.	.	.	.	.	.	.	.	.	.	ColRNAI/100/99.23/130	ColRNAI/100/99.23/130	.	.	.
CP097684.1	-4.04626	-52.8656	0.996976	12	n/a	11	.	.	.	.	.	.	.	.	.	.	.	.	.	.	.	.	.	.	.	.	.	.	.	.	.	.	.	.	.	.	.	.	.	.	.	.	.	.	ColRNAI/100/98.46/130	.	.	.	.
CP097671.1	-3.37542	-52.127	1	12	n/a	11	.	.	.	.	.	.	.	.	.	.	.	.	.	.	.	.	.	.	.	.	.	.	.	.	.	.	.	.	.	.	.	.	.	.	.	.	.	.	ColRNAI/100/98.46/130	.	.	.	.
CP097661.1	-6.56072	-51.927	0.796928	12	n/a	11	.	.	.	.	.	.	.	.	.	.	.	.	.	.	.	.	.	.	.	.	.	.	.	.	.	.	.	.	.	.	.	.	.	.	.	.	.	.	ColRNAI/100/98.46/130	.	.	.	.
CP097630.1	-4.33399	-51.9816	1	12	n/a	11	.	.	.	.	.	.	.	.	.	.	.	.	.	.	.	.	.	.	.	.	.	.	.	.	.	.	.	.	.	.	.	.	.	.	.	.	.	.	ColRNAI/100/98.46/130	.	.	.	.
CP097390.1	-2.95324	-47.1828	0.37385	12	n/a	15	.	.	.	.	.	.	.	.	.	.	.	.	.	.	.	.	.	.	.	.	.	.	.	.	.	.	.	.	.	.	.	.	.	.	.	.	.	.	ColRNAI/100/96.95/130	.	.	.	.
CP097085.1	-3.02876	-50.5652	0.710401	12	n/a	268	.	.	.	.	.	.	.	.	.	.	.	.	.	.	.	.	.	.	.	.	.	.	.	.	.	.	.	.	.	.	.	.	.	.	.	.	.	.	ColRNAI/100/98.46/130	.	.	.	.
CP097078.1	-3.02812	-50.5507	0.703843	12	n/a	268	.	.	.	.	.	.	.	.	.	.	.	.	.	.	.	.	.	.	.	.	.	.	.	.	.	.	.	.	.	.	.	.	.	.	.	.	.	.	ColRNAI/100/98.46/130	.	.	.	.
CP096245.1	-4.39884	-51.9559	1	12	n/a	23	.	.	.	.	.	.	.	.	.	.	.	.	.	.	.	.	.	.	.	.	.	.	.	.	.	.	.	.	.	.	.	.	.	.	.	.	.	.	ColRNAI/100/98.46/130	.	.	.	.
CP096237.1	-3.55156	-49.7572	0.573818	12	n/a	23	.	.	.	.	.	.	.	.	.	.	.	.	.	.	.	.	.	.	.	.	.	.	.	.	.	.	.	.	.	.	.	.	.	.	.	.	.	.	ColRNAI/100/99.23/130	.	.	.	.
CP096233.1	-3.63672	-50.9654	1	12	n/a	23	.	.	.	.	.	.	.	.	.	.	.	.	.	.	.	.	.	.	.	.	.	.	.	.	.	.	.	.	.	.	.	.	.	.	.	.	.	.	ColRNAI/100/98.46/130	.	.	.	.
CP095473.1	-8.69675	-53.7926	0.363638	12	n/a	258	.	.	.	.	.	.	.	.	.	.	.	.	.	.	.	.	.	.	.	.	.	.	.	.	.	.	.	.	.	.	.	.	.	.	.	.	.	.	.	.	.	.	.
CP095432.1	-6.32469	-52.9688	1	12	n/a	11	.	.	.	.	.	.	.	.	.	.	.	.	.	.	.	.	.	.	.	.	.	.	.	.	.	.	.	.	.	.	.	.	.	.	.	.	.	.	ColRNAI/96.92/93.02/130	ColRNAI/100/98.46/130	ColRNAI/99.23/90.15/130	.	.
CP095425.1	-4.39836	-51.9567	1	12	n/a	11	.	.	.	.	.	.	.	.	.	.	.	.	.	.	.	.	.	.	.	.	.	.	.	.	.	.	.	.	.	.	.	.	.	.	.	.	.	.	ColRNAI/100/98.46/130	.	.	.	.
CP095267.1	-5.71392	-53.1667	1	12	n/a	11	.	.	.	.	.	.	.	.	.	.	.	.	.	.	.	.	.	.	.	.	.	.	.	.	.	.	.	.	.	.	.	.	.	.	.	.	.	.	ColRNAI/99.23/90.15/130	ColRNAI/100/98.46/130	.	.	.
CP095259.1	-6.2754	-52.326	1	12	n/a	11	.	.	.	.	.	.	.	.	.	.	.	.	.	.	.	.	.	.	.	.	.	.	.	.	.	.	.	.	.	.	.	.	.	.	.	.	.	.	ColRNAI/100/98.46/130	.	.	.	.
CP095246.1	-4.39884	-51.9559	1	12	n/a	11	.	.	.	.	.	.	.	.	.	.	.	.	.	.	.	.	.	.	.	.	.	.	.	.	.	.	.	.	.	.	.	.	.	.	.	.	.	.	ColRNAI/100/98.46/130	.	.	.	.
CP095238.1	-3.67061	-51.957	1	12	n/a	11	.	.	.	.	.	.	.	.	.	.	.	.	.	.	.	.	.	.	.	.	.	.	.	.	.	.	.	.	.	.	.	.	.	.	.	.	.	.	ColRNAI/100/98.46/130	.	.	.	.
CP092798.1	-6.26678	-52.3107	1	12	n/a	11	.	.	.	.	.	.	.	.	.	.	.	.	.	.	.	.	.	.	.	.	.	.	.	.	.	.	.	.	.	.	.	.	.	.	.	.	.	.	ColRNAI/100/98.46/130	.	.	.	.
CP092719.1	-4.26652	-52.1453	1	12	n/a	11	.	.	.	.	.	.	.	.	.	.	.	.	.	.	.	.	.	.	.	.	.	.	.	.	.	.	.	.	.	.	.	.	.	.	.	.	.	.	ColRNAI/100/98.46/130	.	.	.	.
CP092651.1	-2.94835	-47.1607	1	12	n/a	17	.	.	.	.	.	.	.	.	.	.	.	.	.	.	.	.	.	.	.	.	.	.	.	.	.	.	.	.	.	.	.	.	.	.	.	.	.	.	ColRNAI/100/96.95/130	.	.	.	.
CP092339.1	-2.94467	-47.1507	0.369204	12	n/a	15	.	.	.	.	.	.	.	.	.	.	.	.	.	.	.	.	.	.	.	.	.	.	.	.	.	.	.	.	.	.	.	.	.	.	.	.	.	.	ColRNAI/100/93.89/130	.	.	.	.
CP091072.1	-6.76798	-53.0892	0.987478	12	n/a	11	.	.	.	.	.	.	.	.	.	.	.	.	.	.	.	.	.	.	.	.	.	.	.	.	.	.	.	.	.	.	.	.	.	.	.	.	.	.	ColRNAI/100/98.46/130	.	.	.	.
CP090474.1	-2.95018	-47.1545	0.369897	12	n/a	15	.	.	.	.	.	.	.	.	.	.	.	.	.	.	.	.	.	.	.	.	.	.	.	.	.	.	.	.	.	.	.	.	.	.	.	.	.	.	ColRNAI/100/93.13/130	.	.	.	.
CP090466.1	-6.2754	-52.326	1	12	n/a	11	.	.	.	.	.	.	.	.	.	.	.	.	.	.	.	.	.	.	.	.	.	.	.	.	.	.	.	.	.	.	.	.	.	.	.	.	.	.	ColRNAI/100/98.46/130	.	.	.	.
CP090436.1	-5.68759	-52.9382	1	12	n/a	11	.	.	.	.	.	.	.	.	.	.	.	.	.	.	.	.	.	.	.	.	.	.	.	.	.	.	.	.	.	.	.	.	.	.	.	.	.	.	ColRNAI/100/98.46/130	.	.	.	.
CP090131.1	-4.39921	-51.9553	1	12	n/a	15	.	.	.	.	.	.	.	.	.	.	.	.	.	.	.	.	.	.	.	.	.	.	.	.	.	.	.	.	.	.	.	.	.	.	.	.	.	.	ColRNAI/100/98.46/130	.	.	.	.
CP089992.1	-6.2008	-52.4167	1	12	n/a	2407	.	.	.	.	.	.	.	.	.	.	.	.	.	.	.	.	.	.	.	.	.	.	.	.	.	.	.	.	.	.	.	.	.	.	.	.	.	.	ColRNAI/100/98.46/130	.	.	.	.
CP089957.1	-4.16288	-51.5587	1	12	n/a	11	.	.	.	.	.	.	.	.	.	.	.	.	.	.	.	.	.	.	.	.	.	.	.	.	.	.	.	.	.	.	.	.	.	.	.	.	.	.	ColRNAI/100/98.46/130	.	.	.	.
[truncated: 2,053 more rows]
[truncated: 1 more columns]
